# Supplementary material for: Enhanced virome sequencing using targeted sequence capture
Source: HighWire-hosted journal article supplement (doi:10.1101/gr.191049.115), 2015-09-22
Supplement: Supplemental_Figure_S2.pdf [file Supplemental_Figure_S2.pdf]

Supplemental Figure S2: Non-viral read classification based on metagenomic shotgun sequencing before and after viral targeted sequence capture

Sample ID & Sequencing Technology

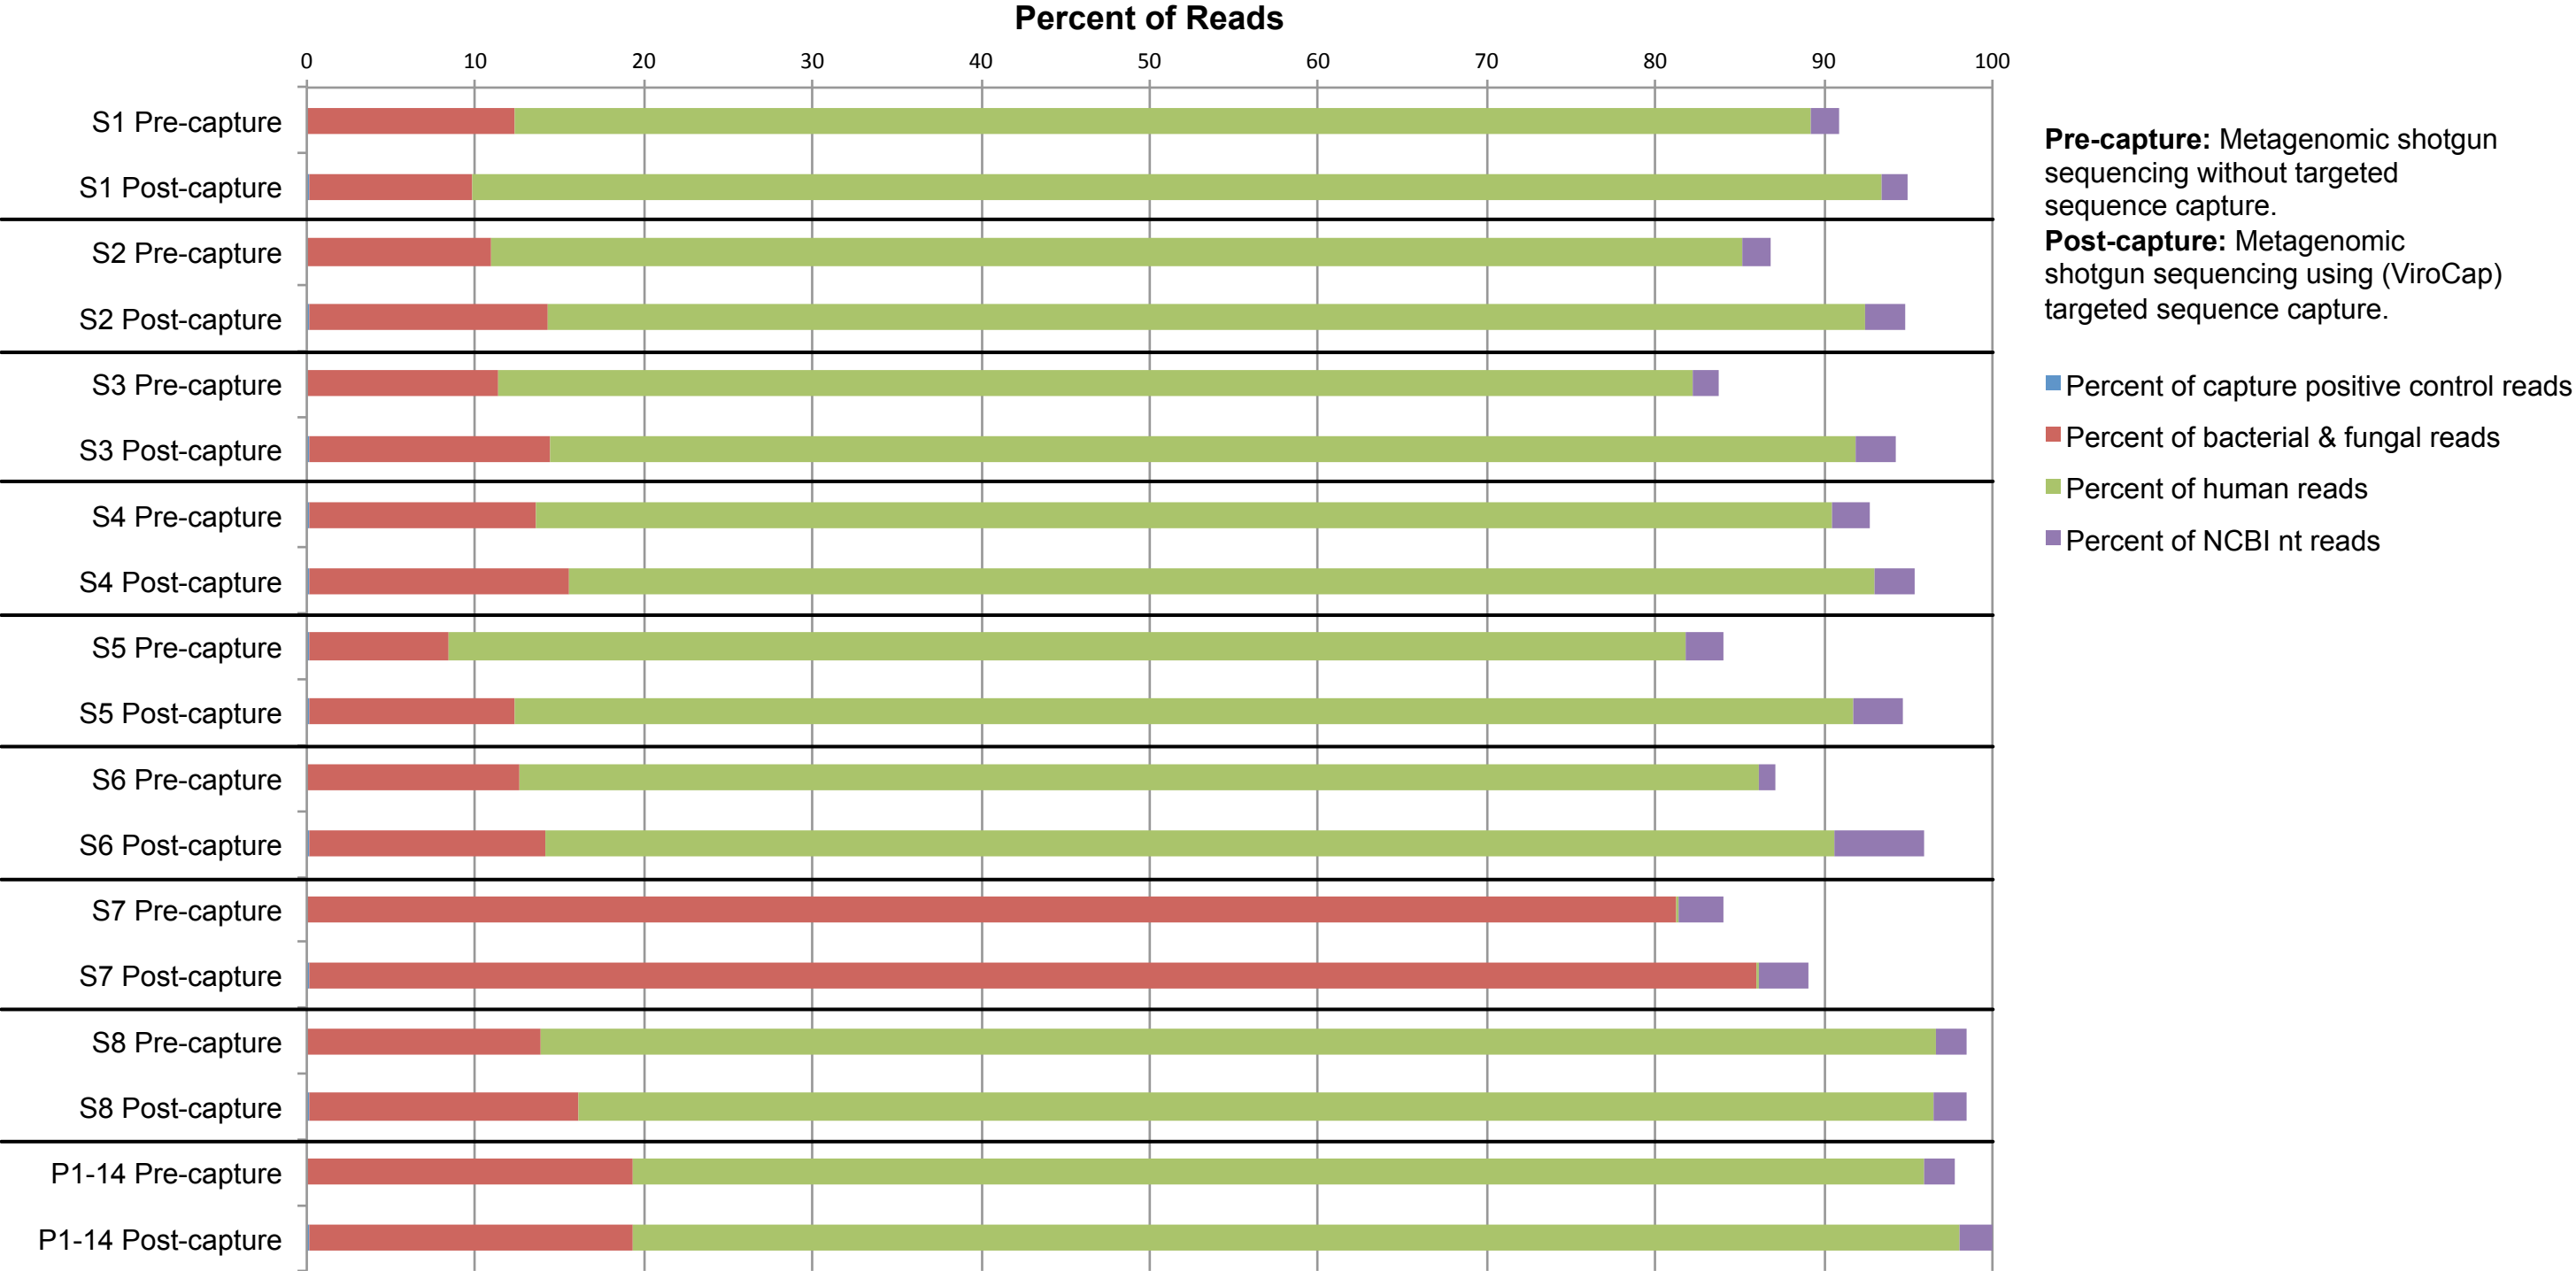

|                                           | P1-14 Post-capture | P1-14 Pre-capture | S8 Post-capture | S8 Pre-capture | S7 Post-capture | S7 Pre-capture | S6 Post-capture | S6 Pre-capture | S5 Post-capture | S5 Pre-capture | S4 Post-capture | S4 Pre-capture | S3 Post-capture | S3 Pre-capture | S2 Post-capture | S2 Pre-capture | S1 Post-capture | S1 Pre-capture |
|-------------------------------------------|--------------------|-------------------|-----------------|----------------|-----------------|----------------|-----------------|----------------|-----------------|----------------|-----------------|----------------|-----------------|----------------|-----------------|----------------|-----------------|----------------|
| Percent of capture positive control reads | 0.1                | 0                 | 0.1             | 0              | 0.1             | 0              | 0.1             | 0              | 0.1             | 0.1            | 0.1             | 0.1            | 0.1             | 0              | 0.1             | 0              | 0.1             | 0              |
| Percent of bacterial & fungal reads       | 19.2               | 19.3              | 16              | 13.9           | 85.9            | 81.3           | 14              | 12.6           | 12.2            | 8.3            | 15.5            | 13.5           | 14.4            | 11.4           | 14.2            | 10.9           | 9.7             | 12.4           |
| Percent of human reads                    | 78.8               | 76.6              | 80.4            | 82.8           | 0.2             | 0.1            | 76.5            | 73.5           | 79.4            | 73.4           | 77.4            | 76.9           | 77.4            | 70.8           | 78.1            | 74.2           | 83.6            | 76.8           |
| Percent of NCBI nt reads                  | 1.9                | 1.9               | 2               | 1.8            | 2.9             | 2.6            | 5.4             | 1              | 3               | 2.2            | 2.4             | 2.2            | 2.4             | 1.6            | 2.4             | 1.8            | 1.5             | 1.7            |
