# Supplementary material for: Enhanced virome sequencing using targeted sequence capture
Source: HighWire-hosted journal article supplement (doi:10.1101/gr.191049.115), 2015-09-22

Supplemental Figure S3: Human chromosome identities based on metagenomic shotgun sequencing before and after viral targeted sequence capture

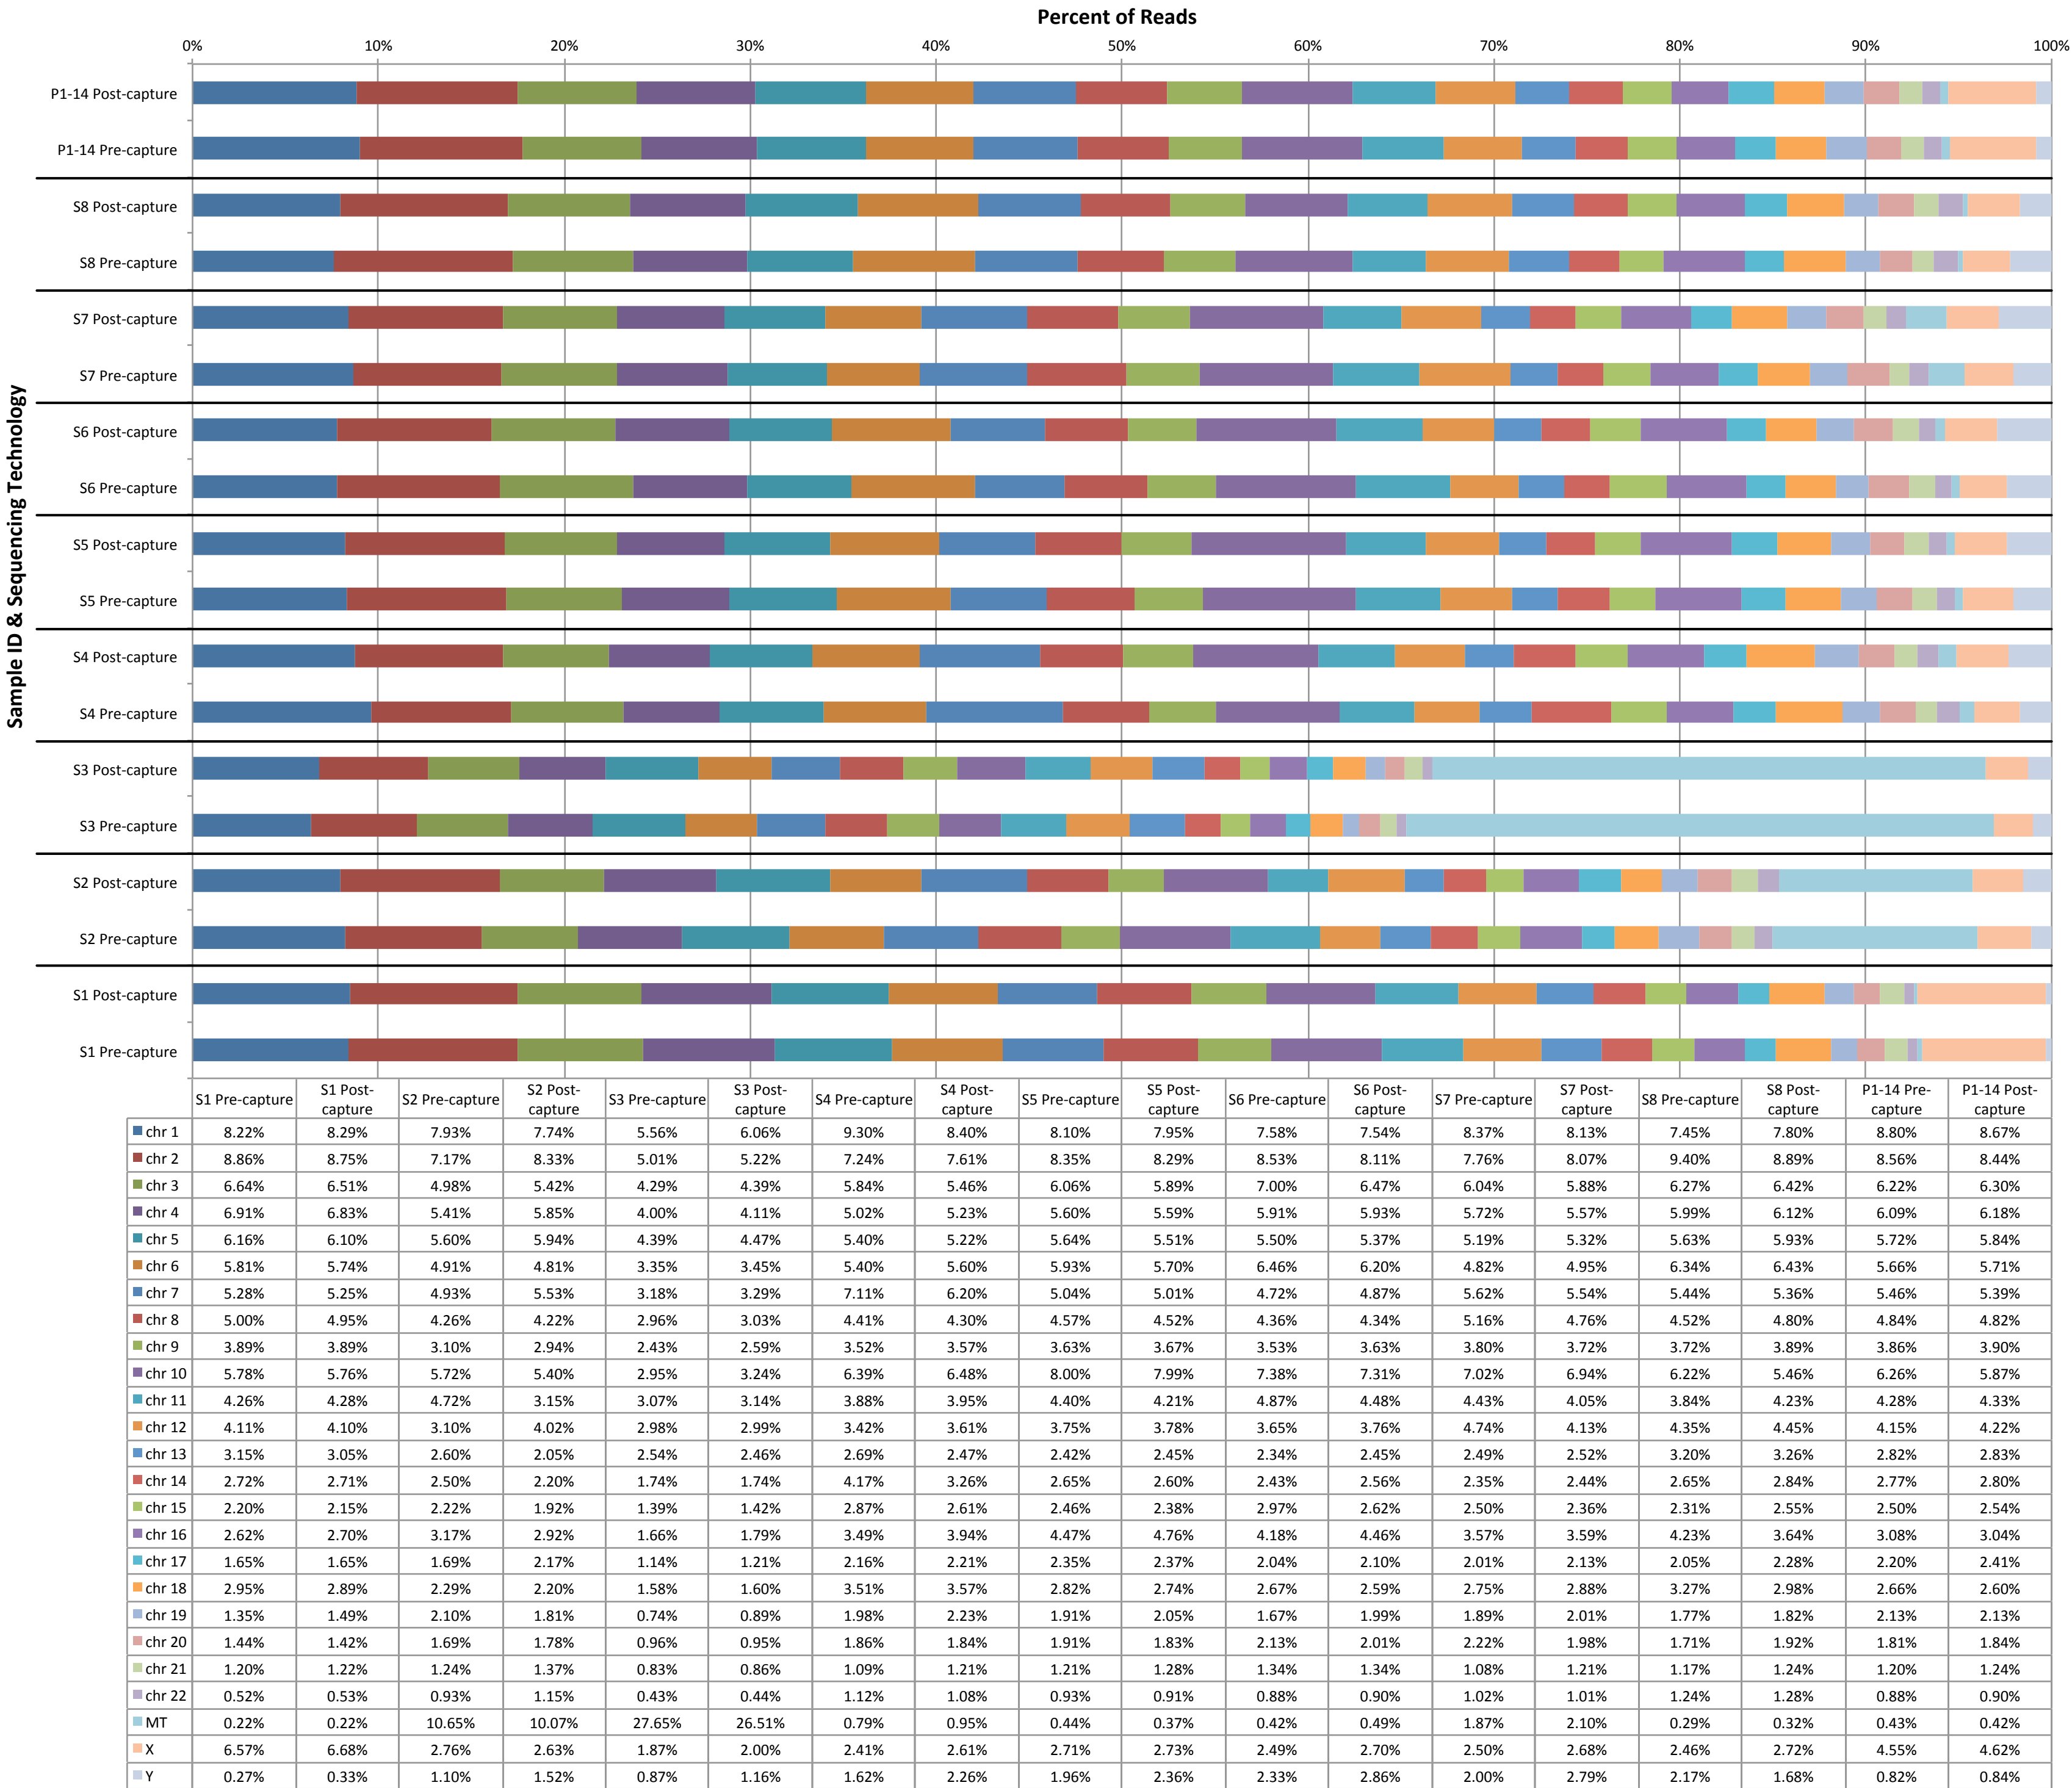

Supplement: Supplemental_Figure_S3.pdf [file Supplemental_Figure_S3.pdf]
