# Supplementary material for: Enhanced virome sequencing using targeted sequence capture
Source: HighWire-hosted journal article supplement (doi:10.1101/gr.191049.115), 2015-09-22
Supplement: Supplemental_Legends.docx [file Supplemental_Legends.docx]

**Supplemental Figure and Table Legends**

**Supplemental Figure S1. Taxonomic distribution of target genomes.**A) Shown are the viral groups, families, and genera included in the ViroCap targeted sequence capture panel. B) Shown are the viral groups, families and genera included in the samples used in ViroCap validation. Taxonomic assignments for panels A and B were obtained from the NCBI Taxonomy Viewer **(**[**http://www.ncbi.nlm.nih.gov/genomes/GenomesGroup.cgi?opt=virus&taxid=10239**](http://www.ncbi.nlm.nih.gov/genomes/GenomesGroup.cgi?opt=virus&taxid=10239)**).**

**Supplemental Figure S2. Non-viral read classification based on metagenomic shotgun sequencing before and after viral targeted sequence capture.** Classifications of non-viral reads were determined based on nucleotide sequence alignment against bacterial and fungal reference genomes, the human genome, NCBI nt, and capture positive control sequences (positive control probes targeting human genes as included by NimbleGen). The percentages of reads per category are shown on the stacked bar charts and in the data table. For each sample, a small percentage of non-viral reads did not map to any of the reference databases evaluated. Proportions of reads mapping to bacteria/fungi, human, and NCBI nt references was similar pre- and post-capture, indicating the viral capture probes did not consistently or strikingly enrich any other class of organisms expected to be found in these samples. As expected, the positive controls were enriched post-capture in each case.

**Supplemental Figure S3. Human chromosome identities based on metagenomic shotgun sequencing before and after viral targeted sequence capture.** The proportions of sequences mapping to each human chromosome and mitochondria are plotted. Viral capture probes did not enrich sequences from human chromosomes. The percentages of human-mapped reads are shown on the stacked bar graphs and in the data table.

**Supplemental Figure S4. Genome Neighbor target sequence selection.** The general approach for Genome Neighbor target sequence selection is illustrated. While this process is performed on all viral RefSeqs, here we illustrate a small genomic region of a single RefSeq and Genome Neighbor pairing. First, all Genome Neighbor sequences related to a single RefSeq entry are located and associated. In this example, the single Genome Neighbor sequence shown, when compared to RefSeq, has a 100 bp span of alternative sequence (panel 1). The Genome Neighbor sequence is used to generate *k*-mers of length 100 bp (i.e. capture probe analogs) by means of an exhaustive 1 bp sliding window algorithm, retaining genomic coordinate origin information for each *k*-mer (panel 2). The resultant set of 100-mers accounts for all potential target sequences that could be used to capture this region. In this example, when comparing Genome Neighbor 100-mers to the corresponding RefSeq genome there is one 100-mer that is completely variant compared to RefSeq, and a set of other 100-mers containing both variant and conserved regions across their lengths due to the nature of the sliding window effect (panel 3). We identify 100-mers that are not represented in the RefSeq genome by sequence clustering (panel 4). Any 100-mers that have >=90% identity to the RefSeq genome are not added to the capture target sequence (Cluster 1, labeled within the figure as “Discarded”). Sequences with <90% identity to RefSeq will form clusters representing variant sequences (Clusters 2-10, labeled within the figure as “Retained”). 100-mers from the variant, non-RefSeq clusters are collected and merged based on genomic coordinates into single, contiguous Genome Neighbor sequence representations used for targeted sequence capture (panel 5).

**Supplemental Table S1 Viral reference genome database size representation in the ViroCap targeted sequence capture panel.**

**Supplemental Table S2. Genome coverage results based on metagenomic shotgun sequencing before and after viral targeted sequence capture.**

**Supplemental Table S3. Segment-level genome coverage results for influenza A and B based on metagenomic shotgun sequencing before and after viral targeted sequence capture.**

**Supplemental Table S4. Anellovirus contig coverage results based on metagenomic shotgun sequencing before and after viral targeted sequence capture.**

**Supplemental Table S5. Non-viral read classification based on metagenomic shotgun sequencing before and after viral targeted sequence capture.**

**Supplemental Table S6. GenBank extended taxonomy and associated base pair representation for targeted sequences in the ViroCap capture panel.**

**Supplemental Table S7. RefSeq and Genome Neighbor ID associations for viruses with vertebrate and invertebrate (insect) hosts as included in the ViroCap capture panel.**

**Supplemental Table S8. ViroCap and PCR correlations.**

**Supplemental Table S9. ViroCap and PCR correlation summary.**
