# Supplementary material for: Enhanced virome sequencing using targeted sequence capture
Source: HighWire-hosted journal article supplement (doi:10.1101/gr.191049.115), 2015-09-22
Supplement: Supplemental_Table_S1.xlsx [file Supplemental_Table_S1.xlsx]

## Sheet: Sheet1
	Supplemental Table S1: Viral reference genome database size representation in the ViroCap targeted sequence capture panel
		Viral sequence representation (Mb)
	Reference sequence database	Before targeted sequence selection	After targeted sequence selection	Fold reduction
	NCBI RefSeq	26.9	26.9	0‡
	NCBI Genome Neighbors	507.1	153.2	3.3
	NCBI Influenza Viral Resource	458.1	15.7	29.2
	Virochip microarray	4.2	3.1	1.4
		996.3	198.9	5
	Sources of viral sequences included in the ViroCap panel include the complete representation of the viral genomes from NCBI’s Reference Sequence (RefSeq) collection, complementary representation of unique regions from Genome Neighbor targets, selected representation of NCBI Influenza Virus Resource sequences, and the entirety of the probe space represented on the Virochip microarray (Guixia Yu et…
	‡ Fold reduction is 0 because reference genomes were completely targeted.
