# Supplementary material for: Enhanced virome sequencing using targeted sequence capture
Source: HighWire-hosted journal article supplement (doi:10.1101/gr.191049.115), 2015-09-22
Supplement: Supplemental_Table_S2.xlsx [file Supplemental_Table_S2.xlsx]

## Sheet: REVISED.xls
	Supplemental Table S2: Genome coverage results based on metagenomic shotgun sequencing before and after viral targeted sequence capture
									Pre-capture: Metagenomic shotgun sequencing without targeted sequence capture													Post-capture: Metagenomic shotgun sequencing using (ViroCap) targeted sequence capture
	Sample ID	Sample type	Virus	Virus length (bp)	GenBank defintion	GenBank version	GenBank GI		Percent of reference bases covereda	No. of reference bases	No. of covered bases	No. of Missing Bases	Ave. coverage depthb	Standard deviation of ave. coverage depth	Median coverage depth	No. of gapsc	Ave. gap length (bp)	Standard deviation of ave. gap length (bp)	Median gap length (bp)	No. of reads layered		Percent of reference bases covereda	No. of reference bases	No. of covered bases	No. of Missing Bases	Ave. coverage depthb	Standard deviation of ave. coverage depth	Median coverage depth	No. of gapsc	Ave. gap length (bp)	Standard deviation of ave. gap length (bp)	Median gap length (bp)	No. of reads layered		∆BoCd
	P1	pooled	Human adenovirus B, type 35	34794	Human adenovirus type 35 strain Holden	AY128640.2	GI:38196041		0.94	34794	328	34466	0.01	0.11	0	5	6893.2	6429.83	6259	5		83.57	34794	29076	5718	19.33	52.7	3	87	65.72	61.71	42	8103		82.63
	P2	pooled	Human bocavirus 1	5299	Human bocavirus DNA, strain: JPOC06-077	AB481073.1	GI:223670841		68.64	5299	3637	1662	1.79	1.98	1	20	83.1	87.51	49	110		100	5299	5299	0	251.09	122.05	233	0	0	NaN	0	15277		31.36
	P3	pooled	Influenza A virus (H3N2)	2341	Influenza A virus (A/New York/392/2004(H3N2)) segment 1	NC_007373.1	GI:73919059		5.85	2341	137	2204	0.06	0.23	0	3	734.67	621.96	362	2		98.25	2341	2300	41	591.6	575.04	382	2	20.5	6.5	20.5	15528		92.4
	P4	pooled	Influenza B virus	2204	Influenza B virus RNA-3	NC_002206.1	GI:8486150		0	2204	0	2204	0	NaN	0	1	2204	NaN	2204	0		30.35	2204	669	1535	13.19	30.71	0	4	383.75	357.82	294	338		30.35
	P5	pooled	Human parvovirus B19	5596	Human parvovirus B19	NC_000883.2	GI:356457872		89.8	5596	5025	571	28.77	17.94	30	3	190.33	150.93	153	1867		100	5596	5596	0	7367.86	4193	7460	0	0	NaN	0	474849		10.2
	P6	pooled	Norovirus GII-4	7560	Norovirus Hu/GII.4/Armidale/NSW390I/2008/AU	GQ845369.3	GI:374674593		46.48	7560	3514	4046	0.8	1.13	0	25	161.84	162.37	128	72		98.35	7560	7435	125	5870.35	8194.3	4296	4	31.25	36.18	15.5	527656		51.87
	P7	pooled	Parechovirus 1	7339	Current classification: Parechovirus 1 (Former name: Echovirus 22 1AB, 1C, 1D, 2A, 2B, 2C, 3A, 3B, 3C, 3D proteins RNA)	L02971.1	GI:323688		0	7339	0	7339	0	NaN	0	1	7339	NaN	7339	0		7.97	7339	585	6754	0.15	0.58	0	6	1125.67	1545.22	94.5	13		7.97
	P8	pooled	BK polyomavirus	5142	BK polyomavirus DNA, isolate: KEN-1	AB263926.1	GI:119926680		1.58	5142	81	5061	0.02	0.12	0	2	2530.5	2000.5	2530.5	1		88.64	5142	4558	584	24.88	32.24	13	7	83.43	67.22	80	1520		87.06
	P9	pooled	JC polyomavirus	5121	JC virus DNA isolate:N4	AB048554.1	GI:15823368		8.59	5121	440	4681	0.09	0.28	0	6	780.17	1012.2	121	5		98.48	5121	5043	78	46.27	53.99	24	4	19.5	16.15	12	2760		89.89
	P10	pooled	Human rhinovirus 15	7134	Human rhinovirus 15	DQ473493.1	GI:95102501		8.8	7134	628	6506	0.09	0.31	0	8	813.25	1006.85	401	8		82.86	7134	5911	1223	115.85	170.32	40	10	122.3	121.68	83.5	9624		74.06
	P11	pooled	Human respiratory syncytial virus, type B	15283	Human respiratory syncytial virus strain NH1067	JQ582844.1	GI:384872840		3.04	15283	464	14819	0.04	0.27	0	6	2469.83	3426.67	985	9		89.45	15283	13671	1612	350.08	1667.22	30	20	80.6	96.83	43	67778		86.41
	P12	pooled	Human herpesvirus 1	152261	Human herpesvirus 1	NC_001806.1	GI:9629378		0	152261	0	152261	0	NaN	0	1	152261	NaN	152261	0		0.78	152261	1189	151072	0.01	0.1	0	11	13733.8	13953.2	7959	0		0.78
	P13	pooled	Torque teno virus	3260	Torque teno virus strain SIA109	FJ426280.1	GI:217416834		1.78	3260	58	3202	0.02	0.13	0	2	1601	837	1601	1		60.74	3260	1980	1280	10.41	23.43	2	10	128	139.87	51	447		58.96
	P14	pooled	Human herpesvirus 3	125030	Human herpesvirus 3 strain 36	DQ479958.1	GI:94482166		0	125030	0	125030	0	NaN	0	1	125030	NaN	125030	0		8.33	125030	10410	114620	0.58	3.52	0	60	1910.33	3636.15	166.5	834		8.33
	S1	single	Torque teno virus	3736	Torque teno virus 7	NC_014080.1	GI:295413954		0	3736	0	3736	0	NaN	0	1	3736	NaN	3736	0		74.38	3736	2779	957	5.22	7.55	2	13	73.62	65.12	49	231		74.38
	S1	single	Human adenovirus B, type 3	35269	Human adenovirus B strain Guangzhou02	DQ105654.4	GI:93308305		89.56	35269	31587	3682	36.14	213.75	6	43	85.63	145.97	45	15116		99.98	35269	35261	8	19097.3	17285.5	13455	2	4	2	4	7703787		10.42
	S2	single	TTV-like mini virus isolate	2912	TTV-like mini virus isolate TTMV_LY1	NC_020498.1	GI:470457049		0	2912	0	2912	0	NaN	0	1	2912	NaN	2912	0		37.5	2912	1092	1820	6.4	18.14	0	3	606.67	509.03	558	249		37.5
	S2	single	Human adenovirus C, type 1	36002	Human adenovirus C strain human/USA/VT13862/2004/1[P1H1F1]	JX173086.1	GI:406679291		15.32	36002	5515	30487	0.2	0.57	0	47	648.66	1049.02	223	87		100	36002	36002	0	283.11	422.28	114	0	0	NaN	0	116502		84.68
	S3	single	Torque teno mini virus	2908	Torque teno mini virus 5	NC_014089.1	GI:295441877		0	2908	0	2908	0	NaN	0	1	2908	NaN	2908	0		22.66	2908	659	2249	6.44	21.77	0	3	749.67	621.73	452	256		22.66
	S3	single	Human parainfluenza virus 3	15462	Human parainfluenza virus 3 strain ZHYMgz01	EU326526.1	GI:163866863		39.54	15462	6114	9348	0.95	1.62	0	33	283.27	444.82	108	172		99.89	15462	15445	17	1462.12	1766.97	768	1	17	NaN	17	262806		60.35
	S4	single	TTV-like mini virus isolate	2915	TTV-like mini virus isolate TTMV_LY3	JX134046.1	GI:459958124		2.81	2915	82	2833	0.03	0.17	0	2	1416.5	1181.5	1416.5	1		13.52	2915	394	2521	23.9	105.69	0	3	840.33	1180.63	7	887		10.71
	S4	single	Human bocavirus 1	5543	Human bocavirus isolate Salvador1	JQ923422.1	GI:404159467		95.4	5543	5288	255	68.3	94.09	41	3	85	65.87	73	4419		100	5543	5543	0	7294.73	3443.14	7246	0	0	NaN	0	460617		4.6
	S5	single	Torque teno virus	3741	Torque teno virus, isolate tth21	AJ620217.1	GI:49202965		0	3741	0	3741	0	NaN	0	1	3741	NaN	3741	0		14.89	3741	557	3184	1.02	3.24	0	5	636.8	507.21	716	56		14.89
	S6	single	Human adenovirus B, type 3A	35264	Human adenovirus B strain human/USA/ak32_AdV3a/2004/3[P3H3F3]	JX423380.1	GI:402173168		0	35264	0	35264	0	NaN	0	1	35264	NaN	35264	0		75.3	35264	26555	8709	2.56	2.76	2	102	85.38	113.63	41.5	1071		75.3
	S6	single	KI polyomavirus	5040	KI polyomavirus Stockholm 380	EF127908.1	GI:124366193		83.37	5040	4202	838	18.39	20.51	9	5	167.6	144.4	94	1034		100	5040	5040	0	7373.19	7123.25	5338	0	0	NaN	0	411173		16.63
	S6	single	Human rhinovirus 80	7138	Human rhinovirus 80 strain ATCC VR-1190	FJ445156.1	GI:217316442		64.95	7138	4636	2502	238.16	313.22	78	12	208.5	182.48	199.5	19232		75.89	7138	5417	1721	39218.6	102546	1785	15	114.73	144.23	61	3120184		10.94
	S7	single	Human adenovirus C, type 1	36006	Human adenovirus C strain human/USA/VT2612/2003/1[P1H1F1]	JX173085.1	GI:406679245		0.77	36006	276	35730	0.01	0.09	0	3	11910	11662.1	5837	3		99.87	36006	35960	46	22.92	25.7	17	4	11.5	12.99	4	9081		99.1
	S7	single	Sapovirus	7429	Sapovirus Chanthaburi-74/Thailand	AY646854.2	GI:380877195		23.26	7429	1728	5701	0.38	0.81	0	14	407.21	546.46	148.5	33		99.95	7429	7425	4	740.14	437.61	682	1	4	NaN	4	61982		76.69
	S7	single	Human astrovirus 1	6816	Human astrovirus 1 strain Hu/Nyergesujfalu/HUN4520/2010/HUN	HQ398856.2	GI:313759913		99.94	6816	6812	4	85.05	135.62	24	1	4	NaN	4	6641		100	6816	6816	0	14725.6	13370.2	9613.5	0	0	NaN	0	1140900		0.06
	S7	single	Human polyomavirus 10	4939	Human polyomavirus 10 isolate 10ww	JX262162.1	GI:394995074		0	4939	0	4939	0	NaN	0	1	4939	NaN	4939	0		70.42	4939	3478	1461	1.57	1.57	1	19	76.89	57.73	70	81		70.42
	S8	single	Torque teno virus	3880	Torque teno virus, isolate TTV-HD20d (uro746)	FR751495.1	GI:339511371		0	3880	0	3880	0	NaN	0	1	3880	NaN	3880	0		38.17	3880	1481	2399	36.98	104.85	0	9	266.56	261.22	131	1817		38.17
	S8	single	Human herpesvirus 6B	161573	Human herpesvirus 6B DNA, strain: HST	AB021506.1	GI:4995977		1.1	161573	1771	159802	0.02	0.23	0	15	10653.5	11967.2	5510	38		38.4	161573	62045	99528	14.24	112.94	0	351	283.56	467.84	148	27523		37.3
	NA: Not applicable; NaN: Not a number
	a Breadth-of-coverage as a percent of total reference length (No. of covered bases divided by No. of reference bases).
	b Mean depth-of-coverage across the reference length; calculated across all positions in the reference, whether covered or uncovered.
	c Number of gapped (uncovered) areas in context of the reference sequence.
	d ∆BoC: Breadth-of-coverage change calculated by subtracting percent of reference bases covered, targeted sequence capture - metagenomic shotgun sequencing.
