# Supplementary material for: Enhanced virome sequencing using targeted sequence capture
Source: HighWire-hosted journal article supplement (doi:10.1101/gr.191049.115), 2015-09-22
Supplement: Supplemental_Table_S5.xlsx [file Supplemental_Table_S5.xlsx]

## Sheet: Table S1
	Supplemental Table S5: Non-viral read classification based on metagenomic shotgun sequencing before and after viral targeted sequence capture
											Non-viral read filtering					Non-viral read identitiesa
	Sample type	Sample ID		Virus(es) detected		Pre- or post-capture	Total reads		Percent viral reads (viral read count)		Total non-viral reads	Percent of reads passing mask filter (read count)	Percent of reads passing mask and adaptor filters (read count)	Percent of reads passing mask, adaptor, and technical filters (read count)		Percent of capture positive control reads (read count)	Percent of bacterial & fungal reads (read count)	Percent of human reads (read count)	Percent of NCBI nt reads (read count)b	Percent of total non-viral reads mapped (read count)
	Nasopharyngeal swab	S1		Torque teno virus; Human adenovirus B, type 3		Pre-capture	4202474		0.4% (15,116)		4187358	83.7% (3,503,645)	79.7% (3,336,097)	79.1% (3,314,130)		0% (0)	12.4% (409,536)	76.8% (2,543,675)	1.7% (57,503)	90.9% (3,010,714)
						Post-capture	16080640		47.9% (7,704,018)		8376622	84.6% (7,084,765)	81.3% (6,813,094)	80.5% (6,746,513)		<0.1% (286)	9.7% (656,181)	83.6% (5,638,382)	1.5% (99,944)	94.8% (6,394,793)
	Nasopharyngeal swab	S2		TTV-like mini virus isolate; Human adenovirus C, type 1		Pre-capture	5087234		<0.1% (87)		5087147	87.8% (4,466,890)	81.9% (4,166,363)	81.3% (4,138,127)		0% (0)	10.9% (451,687)	74.2% (3,069,110)	1.8% (74,979)	86.9% (3,595,776)
						Post-capture	3713962		3.1% (116,751)		3597211	85.9% (3,090,139)	82.7% (2,974,892)	82.0% (2,948,339)		<0.1% (701)	14.2% (417,605)	78.1% (2,303,865)	2.4% (70,786)	94.7% (2,792,957)
	Nasopharyngeal swab	S3		Torque teno mini virus; Human parainfluenza virus 3		Pre-capture	5139462		<0.1% (172)		5139290	82.9% (4,262,698)	78.0% (4,007,111)	77.4% (3,979,138)		0% (0)	11.4% (454,766)	70.8% (2,816,455)	1.6% (62,313)	83.8% (3,333,534)
						Post-capture	4094568		6.4% (263,062)		3831506	80.2% (3,073,249)	77% (2,950,353)	76.1% (2,915,835)		<0.1% (931)	14.4% (418,290)	77.4% (2,255,930)	2.4% (69,352)	94.1% (2,744,503)
	Nasopharyngeal swab	S4		TTV-like mini virus isolate; Human bocavirus 1		Pre-capture	6124424		0.7% (4,420)		6120004	88.6% (5,424,487)	84.7% (5,185,684)	84.2% (5,153,877)		<0.1% (1)	13.5% (693,606)	76.9% (3,961,449)	2.2% (110,525)	92.5% (4,765,581)
						Post-capture	5659554		8.2% (461,504)		5198050	86.5% (4,496,347)	83.5% (4,337,848)	82.8% (4,302,342)		<0.1% (707)	15.5% (665,350)	77.4% (3,329,053)	2.4% (103,954)	95.3% (4,099,064)
	Nasopharyngeal swab	S5		Torque teno virus		Pre-capture	9152970		0% (0)		9152970	84.5% (7,732,422)	78.2% (7,161,848)	77.7% (7,108,816)		<0.1% (1)	8.3% (591,923)	73.4% (5,214,849)	2.2% (154,617)	83.9% (5,961,390)
						Post-capture	5834446		<0.1% (117)		5834329	81.5% (4,756,869)	78.3% (4,565,673)	77.4% (4,515,441)		<0.1% (1076)	12.2% (550,019)	79.4% (3,584,353)	3.0% (133,939)	94.6% (4,269,387)
	Nasopharyngeal swab	S6		Human adenovirus B, type 3A; KI polyomavirus; Human rhinovirus 80		Pre-capture	10179884		0.2% (20,266)		10159618	81.6% (8,291,060)	76.0% (7,724,167)	74.7% (7,589,505)		0% (0)	12.6% (958,739)	73.5% (5,580,948)	1.0% (76,349)	87.2% (6,616,036)
						Post-capture	12064068		29.3% (3,532,428)		8531640	81.6% (6,959,285)	78.3% (6,676,571)	78.2% (6,673,856)		<0.1% (21)	14.2% (948,331)	77.6% (5,180,714)	5.5% (364,115)	97.3% (6,493,181)
	Stool	S7		Human polyomavirus 10; Human adenovirus C, type 1; Sapovirus; Human astrovirus 1		Pre-capture	3691496		0.2% (6,677)		3684819	94.9% (3,495,587)	90.9% (3,347,941)	90.0% (3,316,041)		0% (0)	81.3% (2,695,411)	0.1% (4,197)	2.6% (86,288)	84.0% (2,785,896)
						Post-capture	4104534		29.5% (1,212,044)		2892490	97.2% (2,810,676)	94.1% (2,721,582)	88.0% (2,544,964)		<0.1% (3)	85.9% (2,185,234)	0.2% (5,404)	2.9% (74,491)	89.0% (2,265,132)
	Plasma	S8		Torque teno virus; Human herpesvirus 6B		Pre-capture	10875448		<0.1% (38)		10875410	90.8% (9,879,901)	87.2% (9,484,536)	86.7% (9,428,692)		0% (0)	13.9% (1,309,676)	82.8% (7,804,535)	1.8% (172,740)	98.5% (9,286,951)
						Post-capture	7088360		0.4% (29,340)		7059020	88.6% (6,254,894)	85.1% (6,006,307)	84.5% (5,967,078)		<0.1% (569)	16.0% (954,182)	80.4% (4,798,804)	2.0% (121,960)	98.5% (5,875,515)
	Pooled	P1-P14		Human adenovirus B, type 35; Human bocavirus 1; Influenza A virus (H3N2); Influenza B virus; Human parvovirus B19; Norovirus GII-4; Parechovirus 1; BK polyomavirus; JC polyomavirus; Human rhinovirus 15; Human respiratory syncytial virus, type B; Human herpesvirus 1; Torque teno virus; Human herpesvirus 3		Pre-capture	7458192		<0.1% (2,081)		7456111	88.3% (6,584,766)	84.2% (6,277,629)	83.5% (6,224,995)		0% (0)	19.3% (1,203,117)	76.6% (4,766,963)	1.9% (118,491)	97.8% (6,088,571)
						Post-capture	9295438		12.4% (1,154,647)		8140791	84.8% (6,901,118)	80.8% (6,581,271)	78.3% (6,376,862)		0.1% (2,938)	19.2% (1,224,264)	78.8% (5,024,459)	1.9% (121,258)	99.9% (6,372,919)
	Pre-capture: Metagenomic shotgun sequencing without targeted sequence capture.
	Post-capture: Metagenomic shotgun sequencing using (ViroCap) targeted sequence capture.
	a Non-viral read identities as percent of total reads passing mask, adaptor, and technical filters.
	b The percentage of reads that mapped to the NCBI nt nucleotide database (ftp://ftp.ncbi.nlm.nih.gov/blast/db/)
