# Supplementary material for: Enhanced virome sequencing using targeted sequence capture
Source: HighWire-hosted journal article supplement (doi:10.1101/gr.191049.115), 2015-09-22
Supplement: Supplemental_Table_S6.xlsx [file Supplemental_Table_S6.xlsx]

## Sheet: ViroCap_Viruses_sized.xls
	Supplemental Table S6: GenBank extended taxonomy and associated base pair representation for targeted sequences in the ViroCap capture panel
	GenBank Accession ID	Size (bp)	Division	Rank	ScientificName	TaxId	ParentTaxId	PubDate	Rank1	Rank2	Rank3	Rank4	Superkingdom	Family	Genus	Species	Order	Subfamily	Subgenus	Subspecies
	209842	7734	Viruses	no rank	Human adenovirus 5	28285	129951	1993-04-27 01:00:00	dsDNA viruses, no RNA stage				Viruses	Adenoviridae	Mastadenovirus	Human mastadenovirus C
	1477654	301	Viruses	no rank	Canine adenovirus 1	10512	10537	1993-04-23 01:00:00	dsDNA viruses, no RNA stage				Viruses	Adenoviridae	Mastadenovirus	Canine mastadenovirus A
	1732265	28995	Viruses	no rank	Canine adenovirus 2	10514	10537	1993-04-28 01:00:00	dsDNA viruses, no RNA stage				Viruses	Adenoviridae	Mastadenovirus	Canine mastadenovirus A
	4416335	16768	Viruses	no rank	Human adenovirus 17	46922	130310	1996-05-20 01:00:00	dsDNA viruses, no RNA stage				Viruses	Adenoviridae	Mastadenovirus	Human mastadenovirus D
	6446580	30944	Viruses	species	Murine mastadenovirus A	129956	10509	2000-06-22 13:35:00	dsDNA viruses, no RNA stage				Viruses	Adenoviridae	Mastadenovirus
	6466454	103	Viruses	no rank	Fowl adenovirus 9	172864	190064	2001-10-12 19:01:00	dsDNA viruses, no RNA stage				Viruses	Adenoviridae	Aviadenovirus	Fowl aviadenovirus D
	9626158	35937	Viruses	species	Human mastadenovirus C	129951	10509	2000-06-22 13:18:00	dsDNA viruses, no RNA stage				Viruses	Adenoviridae	Mastadenovirus
	9626553	34214	Viruses	species	Human mastadenovirus F	130309	10509	2000-06-23 17:12:00	dsDNA viruses, no RNA stage				Viruses	Adenoviridae	Mastadenovirus
	9626621	34125	Viruses	species	Human mastadenovirus A	129875	10509	2000-06-21 14:42:00	dsDNA viruses, no RNA stage				Viruses	Adenoviridae	Mastadenovirus
	9628835	43804	Viruses	species	Fowl aviadenovirus A	190061	10552	2002-03-19 18:01:00	dsDNA viruses, no RNA stage				Viruses	Adenoviridae	Aviadenovirus
	9629096	30536	Viruses	species	Canine mastadenovirus A	10537	10509	1993-04-23 01:00:00	dsDNA viruses, no RNA stage				Viruses	Adenoviridae	Mastadenovirus
	9629466	33213	Viruses	species	Duck adenovirus A	130328	100953	2000-06-26 11:42:00	dsDNA viruses, no RNA stage				Viruses	Adenoviridae	Atadenovirus
	9630091	34446	Viruses	species	Bovine mastadenovirus B	129950	10509	2000-06-22 13:12:00	dsDNA viruses, no RNA stage				Viruses	Adenoviridae	Mastadenovirus
	9630778	26263	Viruses	species	Turkey siadenovirus A	298333	129876	2004-10-19 18:05:18	dsDNA viruses, no RNA stage				Viruses	Adenoviridae	Siadenovirus
	9633173	45063	Viruses	species	Fowl aviadenovirus D	190064	10552	2002-03-20 18:19:00	dsDNA viruses, no RNA stage				Viruses	Adenoviridae	Aviadenovirus
	9635795	26163	Viruses	no rank	Frog adenovirus 1	114102	298331	2000-07-23 12:00:00	dsDNA viruses, no RNA stage				Viruses	Adenoviridae	Siadenovirus	Frog siadenovirus A
	9845468	33034	Viruses	species	Ovine mastadenovirus A	114424	10509	2000-02-02 09:48:00	dsDNA viruses, no RNA stage				Viruses	Adenoviridae	Mastadenovirus
	13487858	32621	Viruses	species	Porcine mastadenovirus C	130371	10509	2000-09-08 12:00:00	dsDNA viruses, no RNA stage				Viruses	Adenoviridae	Mastadenovirus
	17105037	16757	Viruses	no rank	Simian adenovirus 25	175567	130308	2001-11-28 18:01:00	dsDNA viruses, no RNA stage				Viruses	Adenoviridae	Mastadenovirus	Human mastadenovirus E
	31339691	31390	Viruses	no rank	Human adenovirus 11	10541	565303	1993-04-28 01:00:00	dsDNA viruses, no RNA stage	Human adenovirus B2			Viruses	Adenoviridae	Mastadenovirus	Human mastadenovirus B
	32967018	31220	Viruses	no rank	Human adenovirus 35	10522	565303	1993-08-04 01:00:00	dsDNA viruses, no RNA stage	Human adenovirus B2			Viruses	Adenoviridae	Mastadenovirus	Human mastadenovirus B
	33330439	7402	Viruses	no rank	Human adenovirus 1	10533	129951	1996-05-20 01:00:00	dsDNA viruses, no RNA stage				Viruses	Adenoviridae	Mastadenovirus	Human mastadenovirus C
	33465830	7626	Viruses	species	Human mastadenovirus C	129951	10509	2000-06-22 13:18:00	dsDNA viruses, no RNA stage				Viruses	Adenoviridae	Mastadenovirus
	34223996	513	Viruses	no rank	Bovine adenovirus 4	70333	130499	1998-06-03 01:00:00	dsDNA viruses, no RNA stage				Viruses	Adenoviridae	Atadenovirus	Bovine adenovirus D
	34303903	31301	Viruses	species	Bovine adenovirus D	130499	100953	2000-06-27 14:47:00	dsDNA viruses, no RNA stage				Viruses	Adenoviridae	Atadenovirus
	38196041	31231	Viruses	no rank	Human adenovirus 35	10522	565303	1993-08-04 01:00:00	dsDNA viruses, no RNA stage	Human adenovirus B2			Viruses	Adenoviridae	Mastadenovirus	Human mastadenovirus B
	40786870	31960	Viruses	no rank	Human adenovirus 7	10519	565302	1993-04-27 01:00:00	dsDNA viruses, no RNA stage	Human adenovirus B1			Viruses	Adenoviridae	Mastadenovirus	Human mastadenovirus B
	41763965	21897	Viruses	no rank	Simian adenovirus 22	175569	130308	2004-02-10 18:02:40	dsDNA viruses, no RNA stage				Viruses	Adenoviridae	Mastadenovirus	Human mastadenovirus E
	41764021	22459	Viruses	no rank	Simian adenovirus 23	35266	130308	1995-03-02	dsDNA viruses, no RNA stage				Viruses	Adenoviridae	Mastadenovirus	Human mastadenovirus E
	41764064	21926	Viruses	no rank	Simian adenovirus 24	175568	130308	2004-02-10 18:02:40	dsDNA viruses, no RNA stage				Viruses	Adenoviridae	Mastadenovirus	Human mastadenovirus E
	42416794	12341	Viruses	no rank	Human adenovirus 4	28280	130308	1993-04-28 01:00:00	dsDNA viruses, no RNA stage				Viruses	Adenoviridae	Mastadenovirus	Human mastadenovirus E
	45504790	11286	Viruses	species	Human mastadenovirus E	130308	10509	2000-06-23 17:11:00	dsDNA viruses, no RNA stage				Viruses	Adenoviridae	Mastadenovirus
	51173196	11352	Viruses	no rank	Human adenovirus 4	28280	130308	1993-04-28 01:00:00	dsDNA viruses, no RNA stage				Viruses	Adenoviridae	Mastadenovirus	Human mastadenovirus E
	51173245	11286	Viruses	no rank	Human adenovirus 4	28280	130308	1993-04-28 01:00:00	dsDNA viruses, no RNA stage				Viruses	Adenoviridae	Mastadenovirus	Human mastadenovirus E
	51173294	31836	Viruses	no rank	Human adenovirus 7	10519	565302	1993-04-27 01:00:00	dsDNA viruses, no RNA stage	Human adenovirus B1			Viruses	Adenoviridae	Mastadenovirus	Human mastadenovirus B
	51518815	34246	Viruses	no rank	Simian adenovirus 3	38420	298334	1995-03-15 09:53:00	dsDNA viruses, no RNA stage				Viruses	Adenoviridae	Mastadenovirus	Simian mastadenovirus A
	51527264	35994	Viruses	species	Human mastadenovirus E	130308	10509	2000-06-23 17:11:00	dsDNA viruses, no RNA stage				Viruses	Adenoviridae	Mastadenovirus
	51702699	31354	Viruses	species	Human mastadenovirus B	108098	10509	1999-11-15 09:04:00	dsDNA viruses, no RNA stage				Viruses	Adenoviridae	Mastadenovirus
	55847711	31707	Viruses	no rank	Human adenovirus 7	10519	565302	1993-04-27 01:00:00	dsDNA viruses, no RNA stage	Human adenovirus B1			Viruses	Adenoviridae	Mastadenovirus	Human mastadenovirus B
	56237058	12166	Viruses	no rank	Human adenovirus 9	10527	130310	1993-04-28 01:00:00	dsDNA viruses, no RNA stage				Viruses	Adenoviridae	Mastadenovirus	Human mastadenovirus D
	57115621	31628	Viruses	no rank	Human adenovirus 14	10521	565303	1996-05-20 01:00:00	dsDNA viruses, no RNA stage	Human adenovirus B2			Viruses	Adenoviridae	Mastadenovirus	Human mastadenovirus B
	57115661	31207	Viruses	no rank	Human adenovirus 34	10548	565303	1993-04-28 01:00:00	dsDNA viruses, no RNA stage	Human adenovirus B2			Viruses	Adenoviridae	Mastadenovirus	Human mastadenovirus B
	57115702	31865	Viruses	no rank	Human adenovirus 50	107462	108098	2001-01-16 12:26:00	dsDNA viruses, no RNA stage				Viruses	Adenoviridae	Mastadenovirus	Human mastadenovirus B
	57115749	31790	Viruses	no rank	Human adenovirus 3	45659	565302	1996-02-07 14:30:00	dsDNA viruses, no RNA stage	Human adenovirus B1			Viruses	Adenoviridae	Mastadenovirus	Human mastadenovirus B
	57115794	14760	Viruses	no rank	Human adenovirus 4	28280	130308	1993-04-28 01:00:00	dsDNA viruses, no RNA stage				Viruses	Adenoviridae	Mastadenovirus	Human mastadenovirus E
	57115841	32032	Viruses	no rank	Human adenovirus 3	45659	565302	1996-02-07 14:30:00	dsDNA viruses, no RNA stage	Human adenovirus B1			Viruses	Adenoviridae	Mastadenovirus	Human mastadenovirus B
	57115887	14480	Viruses	no rank	Human adenovirus 4	28280	130308	1993-04-28 01:00:00	dsDNA viruses, no RNA stage				Viruses	Adenoviridae	Mastadenovirus	Human mastadenovirus E
	57115934	31858	Viruses	no rank	Human adenovirus 21	32608	565302	1994-03-08	dsDNA viruses, no RNA stage	Human adenovirus B1			Viruses	Adenoviridae	Mastadenovirus	Human mastadenovirus B
	57115983	31678	Viruses	no rank	Human adenovirus 7	10519	565302	1993-04-27 01:00:00	dsDNA viruses, no RNA stage	Human adenovirus B1			Viruses	Adenoviridae	Mastadenovirus	Human mastadenovirus B
	57116031	32003	Viruses	no rank	Human adenovirus 16	31544	565302	1994-03-08	dsDNA viruses, no RNA stage	Human adenovirus B1			Viruses	Adenoviridae	Mastadenovirus	Human mastadenovirus B
	58177684	7623	Viruses	no rank	Human adenovirus 5	28285	129951	1993-04-27 01:00:00	dsDNA viruses, no RNA stage				Viruses	Adenoviridae	Mastadenovirus	Human mastadenovirus C
	61602086	34450	Viruses	no rank	Simian adenovirus 1	310540	536079	2005-01-27 18:03:26	dsDNA viruses, no RNA stage				Viruses	Adenoviridae	Mastadenovirus	Human mastadenovirus G
	62177315	13734	Viruses	no rank	Human adenovirus 46	46941	130310	1996-05-20 01:00:00	dsDNA viruses, no RNA stage				Viruses	Adenoviridae	Mastadenovirus	Human mastadenovirus D
	88810171	14515	Viruses	no rank	Human adenovirus 49	218120	130310	2004-04-11 18:02:29	dsDNA viruses, no RNA stage				Viruses	Adenoviridae	Mastadenovirus	Human mastadenovirus D
	93302091	31752	Viruses	species	Human mastadenovirus B	108098	10509	1999-11-15 09:04:00	dsDNA viruses, no RNA stage				Viruses	Adenoviridae	Mastadenovirus
	93308305	31893	Viruses	species	Human mastadenovirus B	108098	10509	1999-11-15 09:04:00	dsDNA viruses, no RNA stage				Viruses	Adenoviridae	Mastadenovirus
	117957257	13365	Viruses	no rank	Human adenovirus 37	52275	130310	1996-03-02	dsDNA viruses, no RNA stage				Viruses	Adenoviridae	Mastadenovirus	Human mastadenovirus D
	124375632	5615	Viruses	no rank	Human adenovirus 52	332179	536079	2005-06-22 18:01:43	dsDNA viruses, no RNA stage				Viruses	Adenoviridae	Mastadenovirus	Human mastadenovirus G
	124388819	12957	Viruses	no rank	Human adenovirus 64	1145295	130310	2012-02-11 18:01:05	dsDNA viruses, no RNA stage				Viruses	Adenoviridae	Mastadenovirus	Human mastadenovirus D
	134105495	28791	Viruses	species	Human mastadenovirus B	108098	10509	1999-11-15 09:04:00	dsDNA viruses, no RNA stage				Viruses	Adenoviridae	Mastadenovirus
	134141802	13745	Viruses	no rank	Human adenovirus 48	39641	130310	1995-04-24 14:26:00	dsDNA viruses, no RNA stage				Viruses	Adenoviridae	Mastadenovirus	Human mastadenovirus D
	134141818	13941	Viruses	no rank	Human adenovirus 26	46928	130310	1996-05-20 01:00:00	dsDNA viruses, no RNA stage				Viruses	Adenoviridae	Mastadenovirus	Human mastadenovirus D
	149395306	11289	Viruses	species	Human mastadenovirus E	130308	10509	2000-06-23 17:11:00	dsDNA viruses, no RNA stage				Viruses	Adenoviridae	Mastadenovirus
	156071807	31290	Viruses	no rank	Human adenovirus 3+11p	459785	108098	2008-07-30 18:00:20	dsDNA viruses, no RNA stage				Viruses	Adenoviridae	Mastadenovirus	Human mastadenovirus B
	156071808	31489	Viruses	no rank	Human adenovirus 3+11p	459785	108098	2008-07-30 18:00:20	dsDNA viruses, no RNA stage				Viruses	Adenoviridae	Mastadenovirus	Human mastadenovirus B
	160700552	27751	Viruses	no rank	Snake adenovirus 1	189830	1146872	2002-03-26 18:01:00	dsDNA viruses, no RNA stage				Viruses	Adenoviridae	Atadenovirus	Snake adenovirus A
	163869641	29576	Viruses	species	Ovine adenovirus D	130327	100953	2000-06-26 11:35:00	dsDNA viruses, no RNA stage				Viruses	Adenoviridae	Atadenovirus
	190340974	35083	Viruses	species	Human mastadenovirus D	130310	10509	2000-06-23 17:34:00	dsDNA viruses, no RNA stage				Viruses	Adenoviridae	Mastadenovirus
	197944726	35343	Viruses	species	Human mastadenovirus B	108098	10509	1999-11-15 09:04:00	dsDNA viruses, no RNA stage				Viruses	Adenoviridae	Mastadenovirus
	197944766	34794	Viruses	species	Human mastadenovirus B	108098	10509	1999-11-15 09:04:00	dsDNA viruses, no RNA stage				Viruses	Adenoviridae	Mastadenovirus
	199589312	25916	Viruses	no rank	Human adenovirus 41	10524	130309	1994-09-21 01:00:00	dsDNA viruses, no RNA stage				Viruses	Adenoviridae	Mastadenovirus	Human mastadenovirus F
	205363480	14680	Viruses	species	Human mastadenovirus D	130310	10509	2000-06-23 17:34:00	dsDNA viruses, no RNA stage				Viruses	Adenoviridae	Mastadenovirus
	218938484	12822	Viruses	no rank	Human adenovirus 22	46924	130310	1996-05-20 01:00:00	dsDNA viruses, no RNA stage				Viruses	Adenoviridae	Mastadenovirus	Human mastadenovirus D
	219522346	36465	Viruses	no rank	Simian adenovirus 44	585078	129951	2009-07-10 18:00:37	dsDNA viruses, no RNA stage				Viruses	Adenoviridae	Mastadenovirus	Human mastadenovirus C
	219522347	36844	Viruses	no rank	Simian adenovirus 43	585077	129951	2009-07-10 18:00:37	dsDNA viruses, no RNA stage				Viruses	Adenoviridae	Mastadenovirus	Human mastadenovirus C
	219522348	36779	Viruses	no rank	Simian adenovirus 45	585079	129951	2009-07-10 18:00:37	dsDNA viruses, no RNA stage				Viruses	Adenoviridae	Mastadenovirus	Human mastadenovirus C
	219522349	36605	Viruses	no rank	Simian adenovirus 42.2	585098	129951	2009-07-10 18:00:37	dsDNA viruses, no RNA stage				Viruses	Adenoviridae	Mastadenovirus	Human mastadenovirus C
	219522350	36590	Viruses	no rank	Simian adenovirus 42.1	585097	129951	2009-07-10 18:00:37	dsDNA viruses, no RNA stage				Viruses	Adenoviridae	Mastadenovirus	Human mastadenovirus C
	219522351	36613	Viruses	no rank	Simian adenovirus 31.2	585088	129951	2009-07-10 18:00:37	dsDNA viruses, no RNA stage				Viruses	Adenoviridae	Mastadenovirus	Human mastadenovirus C
	219522352	36667	Viruses	no rank	Simian adenovirus 34	585068	129951	2009-07-10 18:00:37	dsDNA viruses, no RNA stage				Viruses	Adenoviridae	Mastadenovirus	Human mastadenovirus C
	219522353	35939	Viruses	no rank	Simian adenovirus 31.1	585087	129951	2009-07-10 18:00:37	dsDNA viruses, no RNA stage				Viruses	Adenoviridae	Mastadenovirus	Human mastadenovirus C
	219522354	36575	Viruses	no rank	Simian adenovirus 40.1	585093	129951	2009-07-10 18:00:37	dsDNA viruses, no RNA stage				Viruses	Adenoviridae	Mastadenovirus	Human mastadenovirus C
	219522355	34228	Viruses	no rank	Simian adenovirus 33	585067	108098	2009-07-10 18:00:37	dsDNA viruses, no RNA stage				Viruses	Adenoviridae	Mastadenovirus	Human mastadenovirus B
	219522356	34248	Viruses	no rank	Simian adenovirus 27.1	585083	108098	2009-07-10 18:00:37	dsDNA viruses, no RNA stage				Viruses	Adenoviridae	Mastadenovirus	Human mastadenovirus B
	219522357	34739	Viruses	no rank	Simian adenovirus 35.2	585090	108098	2009-07-10 18:00:37	dsDNA viruses, no RNA stage				Viruses	Adenoviridae	Mastadenovirus	Human mastadenovirus B
	219522358	33199	Viruses	no rank	Simian adenovirus 32	585066	108098	2009-07-10 18:00:37	dsDNA viruses, no RNA stage				Viruses	Adenoviridae	Mastadenovirus	Human mastadenovirus B
	219522359	34785	Viruses	no rank	Simian adenovirus 35.1	585089	108098	2009-07-10 18:00:37	dsDNA viruses, no RNA stage				Viruses	Adenoviridae	Mastadenovirus	Human mastadenovirus B
	219522360	33549	Viruses	no rank	Simian adenovirus 41.1	585095	108098	2009-07-10 18:00:37	dsDNA viruses, no RNA stage				Viruses	Adenoviridae	Mastadenovirus	Human mastadenovirus B
	219522361	33682	Viruses	no rank	Simian adenovirus 28.1	585085	108098	2009-07-10 18:00:37	dsDNA viruses, no RNA stage				Viruses	Adenoviridae	Mastadenovirus	Human mastadenovirus B
	219522362	33863	Viruses	no rank	Simian adenovirus 28.2	585086	108098	2009-07-10 18:00:37	dsDNA viruses, no RNA stage				Viruses	Adenoviridae	Mastadenovirus	Human mastadenovirus B
	219522363	33828	Viruses	no rank	Simian adenovirus 29	585063	108098	2009-07-10 18:00:37	dsDNA viruses, no RNA stage				Viruses	Adenoviridae	Mastadenovirus	Human mastadenovirus B
	219522364	20152	Viruses	no rank	Simian adenovirus 36	585070	130308	2009-07-10 18:00:37	dsDNA viruses, no RNA stage				Viruses	Adenoviridae	Mastadenovirus	Human mastadenovirus E
	219522365	20587	Viruses	no rank	Simian adenovirus 25.2	585082	175567	2009-07-04 18:00:36	dsDNA viruses, no RNA stage	Simian adenovirus 25			Viruses	Adenoviridae	Mastadenovirus	Human mastadenovirus E
	219522366	18821	Viruses	no rank	Simian adenovirus 37.2	585092	585071	2009-07-10 18:00:37	dsDNA viruses, no RNA stage	Simian adenovirus 37			Viruses	Adenoviridae	Mastadenovirus	Human mastadenovirus E
	219522367	17550	Viruses	no rank	Simian adenovirus 30	585064	130308	2009-07-04 18:00:36	dsDNA viruses, no RNA stage				Viruses	Adenoviridae	Mastadenovirus	Human mastadenovirus E
	219522368	18797	Viruses	no rank	Simian adenovirus 37.1	585091	585071	2009-07-10 18:00:37	dsDNA viruses, no RNA stage	Simian adenovirus 37			Viruses	Adenoviridae	Mastadenovirus	Human mastadenovirus E
	219522369	21965	Viruses	no rank	Simian adenovirus 38	585072	130308	2009-07-04 18:00:36	dsDNA viruses, no RNA stage				Viruses	Adenoviridae	Mastadenovirus	Human mastadenovirus E
	219522370	13092	Viruses	no rank	Simian adenovirus 26	585060	130308	2009-07-04 18:00:36	dsDNA viruses, no RNA stage				Viruses	Adenoviridae	Mastadenovirus	Human mastadenovirus E
	219522371	18634	Viruses	no rank	Simian adenovirus 39	585073	130308	2009-07-04 18:00:36	dsDNA viruses, no RNA stage				Viruses	Adenoviridae	Mastadenovirus	Human mastadenovirus E
	219522372	36605	Viruses	no rank	Simian adenovirus 42.3	585099	129951	2009-07-10 18:00:37	dsDNA viruses, no RNA stage				Viruses	Adenoviridae	Mastadenovirus	Human mastadenovirus C
	219522373	36607	Viruses	no rank	Simian adenovirus 40.2	585094	129951	2009-07-10 18:00:37	dsDNA viruses, no RNA stage				Viruses	Adenoviridae	Mastadenovirus	Human mastadenovirus C
	219522374	33938	Viruses	no rank	Simian adenovirus 41.2	585096	108098	2009-07-10 18:00:37	dsDNA viruses, no RNA stage				Viruses	Adenoviridae	Mastadenovirus	Human mastadenovirus B
	219522375	33853	Viruses	no rank	Simian adenovirus 27.2	585084	108098	2009-07-10 18:00:37	dsDNA viruses, no RNA stage				Viruses	Adenoviridae	Mastadenovirus	Human mastadenovirus B
	219522376	33819	Viruses	no rank	Simian adenovirus 47	585081	108098	2009-07-10 18:00:37	dsDNA viruses, no RNA stage				Viruses	Adenoviridae	Mastadenovirus	Human mastadenovirus B
	219522377	33677	Viruses	no rank	Simian adenovirus 46	585080	108098	2009-07-10 18:00:37	dsDNA viruses, no RNA stage				Viruses	Adenoviridae	Mastadenovirus	Human mastadenovirus B
	222143573	13001	Viruses	no rank	Human adenovirus 8	31545	130310	1996-05-20 01:00:00	dsDNA viruses, no RNA stage				Viruses	Adenoviridae	Mastadenovirus	Human mastadenovirus D
	222143610	12439	Viruses	no rank	Human adenovirus 8	31545	130310	1996-05-20 01:00:00	dsDNA viruses, no RNA stage				Viruses	Adenoviridae	Mastadenovirus	Human mastadenovirus D
	222143647	12675	Viruses	no rank	Human adenovirus 8	31545	130310	1996-05-20 01:00:00	dsDNA viruses, no RNA stage				Viruses	Adenoviridae	Mastadenovirus	Human mastadenovirus D
	222143721	12814	Viruses	no rank	Human adenovirus 19	28278	130310	1993-04-28 01:00:00	dsDNA viruses, no RNA stage				Viruses	Adenoviridae	Mastadenovirus	Human mastadenovirus D
	222143758	13023	Viruses	no rank	Human adenovirus 19	28278	130310	1993-04-28 01:00:00	dsDNA viruses, no RNA stage				Viruses	Adenoviridae	Mastadenovirus	Human mastadenovirus D
	222143795	13023	Viruses	no rank	Human adenovirus 19	28278	130310	1993-04-28 01:00:00	dsDNA viruses, no RNA stage				Viruses	Adenoviridae	Mastadenovirus	Human mastadenovirus D
	222143832	13023	Viruses	no rank	Human adenovirus 19	28278	130310	1993-04-28 01:00:00	dsDNA viruses, no RNA stage				Viruses	Adenoviridae	Mastadenovirus	Human mastadenovirus D
	222143869	13209	Viruses	no rank	Human adenovirus 37	52275	130310	1996-03-02	dsDNA viruses, no RNA stage				Viruses	Adenoviridae	Mastadenovirus	Human mastadenovirus D
	222143906	13362	Viruses	no rank	Human adenovirus 37	52275	130310	1996-03-02	dsDNA viruses, no RNA stage				Viruses	Adenoviridae	Mastadenovirus	Human mastadenovirus D
	222143943	13521	Viruses	no rank	Human adenovirus 37	52275	130310	1996-03-02	dsDNA viruses, no RNA stage				Viruses	Adenoviridae	Mastadenovirus	Human mastadenovirus D
	222143980	12711	Viruses	no rank	Human adenovirus 37	52275	130310	1996-03-02	dsDNA viruses, no RNA stage				Viruses	Adenoviridae	Mastadenovirus	Human mastadenovirus D
	225350456	2948	Viruses	no rank	Human adenovirus 6	10534	129951	1996-05-20 01:00:00	dsDNA viruses, no RNA stage				Viruses	Adenoviridae	Mastadenovirus	Human mastadenovirus C
	226726394	31672	Viruses	no rank	Human adenovirus 14	10521	565303	1996-05-20 01:00:00	dsDNA viruses, no RNA stage	Human adenovirus B2			Viruses	Adenoviridae	Mastadenovirus	Human mastadenovirus B
	227122414	30570	Viruses	no rank	Murine adenovirus 3	573199	696859	2009-04-21 18:00:35	dsDNA viruses, no RNA stage				Viruses	Adenoviridae	Mastadenovirus	Murine mastadenovirus C
	233770158	14896	Viruses	no rank	Human adenovirus 28	46930	130310	1996-05-20 01:00:00	dsDNA viruses, no RNA stage				Viruses	Adenoviridae	Mastadenovirus	Human mastadenovirus D
	238915414	13445	Viruses	no rank	Human adenovirus 22	46924	130310	1996-05-20 01:00:00	dsDNA viruses, no RNA stage				Viruses	Adenoviridae	Mastadenovirus	Human mastadenovirus D
	253761974	34920	Viruses	no rank	Human adenovirus 54	651580	130310	2009-06-12 18:00:34	dsDNA viruses, no RNA stage				Viruses	Adenoviridae	Mastadenovirus	Human mastadenovirus D
	255958147	11473	Viruses	no rank	Human adenovirus 54	651580	130310	2009-06-12 18:00:34	dsDNA viruses, no RNA stage				Viruses	Adenoviridae	Mastadenovirus	Human mastadenovirus D
	256028986	31651	Viruses	no rank	Human adenovirus 55	714978	565303	2010-01-30 18:00:36	dsDNA viruses, no RNA stage	Human adenovirus B2			Viruses	Adenoviridae	Mastadenovirus	Human mastadenovirus B
	257122613	31470	Viruses	no rank	Human adenovirus 11a	343463	10541	1994-09-22 01:00:00	dsDNA viruses, no RNA stage	Human adenovirus B2	Human adenovirus 11		Viruses	Adenoviridae	Mastadenovirus	Human mastadenovirus B
	260175491	31828	Viruses	no rank	Human adenovirus 7	10519	565302	1993-04-27 01:00:00	dsDNA viruses, no RNA stage	Human adenovirus B1			Viruses	Adenoviridae	Mastadenovirus	Human mastadenovirus B
	261875889	14142	Viruses	no rank	Human adenovirus 36	46936	130310	1996-05-20 01:00:00	dsDNA viruses, no RNA stage				Viruses	Adenoviridae	Mastadenovirus	Human mastadenovirus D
	269990916	31336	Viruses	no rank	Human adenovirus 31	10529	129875	1993-04-28 01:00:00	dsDNA viruses, no RNA stage				Viruses	Adenoviridae	Mastadenovirus	Human mastadenovirus A
	270567218	31985	Viruses	no rank	Human adenovirus 18	10528	129875	1993-04-28 01:00:00	dsDNA viruses, no RNA stage				Viruses	Adenoviridae	Mastadenovirus	Human mastadenovirus A
	304633245	4035	Viruses	species	Human mastadenovirus C	129951	10509	2000-06-22 13:18:00	dsDNA viruses, no RNA stage				Viruses	Adenoviridae	Mastadenovirus
	308152910	15207	Viruses	no rank	Human adenovirus 15	28276	130310	1996-05-20 01:00:00	dsDNA viruses, no RNA stage				Viruses	Adenoviridae	Mastadenovirus	Human mastadenovirus D
	308152947	14632	Viruses	no rank	Human adenovirus 29	46931	130310	1996-05-20 01:00:00	dsDNA viruses, no RNA stage				Viruses	Adenoviridae	Mastadenovirus	Human mastadenovirus D
	308152983	12016	Viruses	species	Human mastadenovirus D	130310	10509	2000-06-23 17:34:00	dsDNA viruses, no RNA stage				Viruses	Adenoviridae	Mastadenovirus
	308207253	12197	Viruses	no rank	Human adenovirus 56	880565	377622	2010-09-07 18:00:46	dsDNA viruses, no RNA stage	unclassified Human adenovirus D			Viruses	Adenoviridae	Mastadenovirus	Human mastadenovirus D
	312176476	102	Viruses	species	Fowl aviadenovirus C	190063	10552	2002-03-20 18:19:00	dsDNA viruses, no RNA stage				Viruses	Adenoviridae	Aviadenovirus
	315258818	14086	Viruses	species	Human mastadenovirus D	130310	10509	2000-06-23 17:34:00	dsDNA viruses, no RNA stage				Viruses	Adenoviridae	Mastadenovirus
	315258855	13227	Viruses	species	Human mastadenovirus D	130310	10509	2000-06-23 17:34:00	dsDNA viruses, no RNA stage				Viruses	Adenoviridae	Mastadenovirus
	315258891	13194	Viruses	species	Human mastadenovirus D	130310	10509	2000-06-23 17:34:00	dsDNA viruses, no RNA stage				Viruses	Adenoviridae	Mastadenovirus
	315258927	13915	Viruses	no rank	Human adenovirus 53	556926	130310	2008-09-27 18:00:31	dsDNA viruses, no RNA stage				Viruses	Adenoviridae	Mastadenovirus	Human mastadenovirus D
	315258963	13761	Viruses	no rank	Human adenovirus 53	556926	130310	2008-09-27 18:00:31	dsDNA viruses, no RNA stage				Viruses	Adenoviridae	Mastadenovirus	Human mastadenovirus D
	315259000	13931	Viruses	no rank	Human adenovirus 53	556926	130310	2008-09-27 18:00:31	dsDNA viruses, no RNA stage				Viruses	Adenoviridae	Mastadenovirus	Human mastadenovirus D
	315259037	13931	Viruses	no rank	Human adenovirus 53	556926	130310	2008-09-27 18:00:31	dsDNA viruses, no RNA stage				Viruses	Adenoviridae	Mastadenovirus	Human mastadenovirus D
	317140354	2950	Viruses	no rank	Human adenovirus 6	10534	129951	1996-05-20 01:00:00	dsDNA viruses, no RNA stage				Viruses	Adenoviridae	Mastadenovirus	Human mastadenovirus C
	318065965	35203	Viruses	no rank	Murine adenovirus 2	931972	1146873	2011-01-02 18:00:58	dsDNA viruses, no RNA stage				Viruses	Adenoviridae	Mastadenovirus	Murine mastadenovirus B
	320202734	44055	Viruses	species	Fowl aviadenovirus E	190065	10552	2002-03-19 18:01:00	dsDNA viruses, no RNA stage				Viruses	Adenoviridae	Aviadenovirus
	324105303	14288	Viruses	no rank	Human adenovirus 17	46922	130310	1996-05-20 01:00:00	dsDNA viruses, no RNA stage				Viruses	Adenoviridae	Mastadenovirus	Human mastadenovirus D
	325659061	1884	Viruses	no rank	Simian adenovirus 50	995023	1165908	2011-03-15 18:00:31	dsDNA viruses, no RNA stage	unclassified Simian adenoviruses			Viruses	Adenoviridae	Mastadenovirus	Simian adenovirus B
	327409465	45667	Viruses	species	Fowl aviadenovirus C	190063	10552	2002-03-20 18:19:00	dsDNA viruses, no RNA stage				Viruses	Adenoviridae	Aviadenovirus
	327415370	35499	Viruses	no rank	Simian adenovirus 49	995022	1165908	2011-03-15 18:00:31	dsDNA viruses, no RNA stage	unclassified Simian adenoviruses			Viruses	Adenoviridae	Mastadenovirus	Simian adenovirus B
	330368803	29137	Viruses	no rank	Human adenovirus 7	10519	565302	1993-04-27 01:00:00	dsDNA viruses, no RNA stage	Human adenovirus B1			Viruses	Adenoviridae	Mastadenovirus	Human mastadenovirus B
	331271175	26284	Viruses	no rank	Raptor adenovirus 1	1520002	691961	2014-07-14 13:01:58	dsDNA viruses, no RNA stage				Viruses	Adenoviridae	Siadenovirus	Raptor siadenovirus A
	335315321	25935	Viruses	no rank	Human adenovirus 41	10524	130309	1994-09-21 01:00:00	dsDNA viruses, no RNA stage				Viruses	Adenoviridae	Mastadenovirus	Human mastadenovirus F
	341573861	31210	Viruses	no rank	Human adenovirus 61	1069441	129875	2011-07-26 18:00:47	dsDNA viruses, no RNA stage				Viruses	Adenoviridae	Mastadenovirus	Human mastadenovirus A
	341818644	14330	Viruses	species	Human mastadenovirus D	130310	10509	2000-06-23 17:34:00	dsDNA viruses, no RNA stage				Viruses	Adenoviridae	Mastadenovirus
	342898882	15387	Viruses	no rank	Human adenovirus 62	1091197	130310	2011-10-02 18:00:53	dsDNA viruses, no RNA stage				Viruses	Adenoviridae	Mastadenovirus	Human mastadenovirus D
	342898919	14433	Viruses	no rank	Human adenovirus 60a	1091198	130310	2011-10-02 18:00:53	dsDNA viruses, no RNA stage				Viruses	Adenoviridae	Mastadenovirus	Human mastadenovirus D
	345462093	31616	Viruses	no rank	Bat adenovirus 2	696069	1146874	2009-12-05 18:00:40	dsDNA viruses, no RNA stage				Viruses	Adenoviridae	Mastadenovirus	Bat mastadenovirus B
	357640515	31734	Viruses	no rank	Human adenovirus 66	1337398	377612	2013-06-03 13:01:29	dsDNA viruses, no RNA stage	unclassified Human adenovirus B			Viruses	Adenoviridae	Mastadenovirus	Human mastadenovirus B
	357640557	31728	Viruses	no rank	Human adenovirus 7d2	326124	10519	2005-05-02 18:03:56	dsDNA viruses, no RNA stage	Human adenovirus B1	Human adenovirus 7		Viruses	Adenoviridae	Mastadenovirus	Human mastadenovirus B
	357640599	32791	Viruses	no rank	Human adenovirus 68	1096763	565302	2011-12-20 18:01:05	dsDNA viruses, no RNA stage	Human adenovirus B1			Viruses	Adenoviridae	Mastadenovirus	Human mastadenovirus B
	357640641	31683	Viruses	no rank	Human adenovirus 3+7	260047	108098	2004-04-02 18:02:36	dsDNA viruses, no RNA stage				Viruses	Adenoviridae	Mastadenovirus	Human mastadenovirus B
	357640683	31924	Viruses	no rank	Human adenovirus 16	31544	565302	1994-03-08	dsDNA viruses, no RNA stage	Human adenovirus B1			Viruses	Adenoviridae	Mastadenovirus	Human mastadenovirus B
	363540913	26340	Viruses	no rank	Skua adenovirus 1	1520004	886980	2014-07-14 13:01:58	dsDNA viruses, no RNA stage				Viruses	Adenoviridae	Siadenovirus	Skua siadenovirus A
	363987165	13788	Viruses	no rank	Human adenovirus 65	1094363	130310	2011-12-20 18:01:05	dsDNA viruses, no RNA stage				Viruses	Adenoviridae	Mastadenovirus	Human mastadenovirus D
	365775793	4805	Viruses	no rank	Bovine adenovirus 3	10510	129950	1994-04-29 01:00:00	dsDNA viruses, no RNA stage				Viruses	Adenoviridae	Mastadenovirus	Bovine mastadenovirus B
	365824246	45413	Viruses	no rank	Turkey adenovirus 1	878329	1146875	2010-09-06 18:00:44	dsDNA viruses, no RNA stage				Viruses	Adenoviridae	Aviadenovirus	Turkey aviadenovirus B
	375300321	12957	Viruses	no rank	Human adenovirus 64	1145295	130310	2012-02-11 18:01:05	dsDNA viruses, no RNA stage				Viruses	Adenoviridae	Mastadenovirus	Human mastadenovirus D
	375300360	13051	Viruses	no rank	Human adenovirus 64	1145295	130310	2012-02-11 18:01:05	dsDNA viruses, no RNA stage				Viruses	Adenoviridae	Mastadenovirus	Human mastadenovirus D
	375300399	12688	Viruses	no rank	Human adenovirus 64	1145295	130310	2012-02-11 18:01:05	dsDNA viruses, no RNA stage				Viruses	Adenoviridae	Mastadenovirus	Human mastadenovirus D
	375300438	13623	Viruses	no rank	Human adenovirus 19	28278	130310	1993-04-28 01:00:00	dsDNA viruses, no RNA stage				Viruses	Adenoviridae	Mastadenovirus	Human mastadenovirus D
	378554412	31681	Viruses	no rank	Bat adenovirus TJM	727977	1146877	2010-03-06 18:00:45	dsDNA viruses, no RNA stage				Viruses	Adenoviridae	Mastadenovirus	Bat mastadenovirus A
	378786191	15735	Viruses	no rank	Human adenovirus 67	1101371	130310	2012-02-29 18:00:53	dsDNA viruses, no RNA stage				Viruses	Adenoviridae	Mastadenovirus	Human mastadenovirus D
	379977028	7973	Viruses	no rank	Simian adenovirus A1139	1159186	1165908	2012-03-22 18:00:54	dsDNA viruses, no RNA stage	unclassified Simian adenoviruses			Viruses	Adenoviridae	Mastadenovirus	Simian adenovirus B
	379977061	8299	Viruses	no rank	Simian adenovirus A1163	1159187	1165908	2012-03-22 18:00:54	dsDNA viruses, no RNA stage	unclassified Simian adenoviruses			Viruses	Adenoviridae	Mastadenovirus	Simian adenovirus B
	379977093	26610	Viruses	no rank	Simian adenovirus A1173	1159188	1165908	2012-03-22 18:00:54	dsDNA viruses, no RNA stage	unclassified Simian adenoviruses			Viruses	Adenoviridae	Mastadenovirus	Simian adenovirus B
	379977128	26363	Viruses	no rank	Simian adenovirus A1258	1159189	1165908	2012-03-22 18:00:54	dsDNA viruses, no RNA stage	unclassified Simian adenoviruses			Viruses	Adenoviridae	Mastadenovirus	Simian adenovirus B
	379977161	26607	Viruses	no rank	Simian adenovirus A1285	1159190	1165908	2012-03-22 18:00:54	dsDNA viruses, no RNA stage	unclassified Simian adenoviruses			Viruses	Adenoviridae	Mastadenovirus	Simian adenovirus B
	379977195	9398	Viruses	no rank	Simian adenovirus A1296	1159191	1165908	2012-03-22 18:00:54	dsDNA viruses, no RNA stage	unclassified Simian adenoviruses			Viruses	Adenoviridae	Mastadenovirus	Simian adenovirus B
	379977228	8945	Viruses	no rank	Simian adenovirus A1312	1159192	1165908	2012-03-22 18:00:54	dsDNA viruses, no RNA stage	unclassified Simian adenoviruses			Viruses	Adenoviridae	Mastadenovirus	Simian adenovirus B
	379977262	6340	Viruses	no rank	Simian adenovirus A1327	1159193	1165908	2012-03-22 18:00:54	dsDNA viruses, no RNA stage	unclassified Simian adenoviruses			Viruses	Adenoviridae	Mastadenovirus	Simian adenovirus B
	379977295	8148	Viruses	no rank	Simian adenovirus A1335	1159194	1165908	2012-03-22 18:00:54	dsDNA viruses, no RNA stage	unclassified Simian adenoviruses			Viruses	Adenoviridae	Mastadenovirus	Simian adenovirus B
	381214017	940	Viruses	species	Fowl aviadenovirus C	190063	10552	2002-03-20 18:19:00	dsDNA viruses, no RNA stage				Viruses	Adenoviridae	Aviadenovirus
	381283770	13382	Viruses	no rank	Simian adenovirus 6	413259	298334	1995-03-15 09:58:00	dsDNA viruses, no RNA stage				Viruses	Adenoviridae	Mastadenovirus	Simian mastadenovirus A
	384038916	31738	Viruses	no rank	Human adenovirus 14	10521	565303	1996-05-20 01:00:00	dsDNA viruses, no RNA stage	Human adenovirus B2			Viruses	Adenoviridae	Mastadenovirus	Human mastadenovirus B
	384628577	31841	Viruses	no rank	Human adenovirus 7	10519	565302	1993-04-27 01:00:00	dsDNA viruses, no RNA stage	Human adenovirus B1			Viruses	Adenoviridae	Mastadenovirus	Human mastadenovirus B
	386522683	36711	Viruses	no rank	Chimpanzee adenovirus Y25	1123958	130308	2011-12-25 18:01:07	dsDNA viruses, no RNA stage				Viruses	Adenoviridae	Mastadenovirus	Human mastadenovirus E
	388570674	43376	Viruses	no rank	Goose adenovirus 4	1193422	1193420	2012-05-24 18:00:39	dsDNA viruses, no RNA stage				Viruses	Adenoviridae	Aviadenovirus	Goose aviadenovirus A
	401022295	31536	Viruses	no rank	Human adenovirus 55	714978	565303	2010-01-30 18:00:36	dsDNA viruses, no RNA stage	Human adenovirus B2			Viruses	Adenoviridae	Mastadenovirus	Human mastadenovirus B
	401022332	31660	Viruses	no rank	Human adenovirus 55	714978	565303	2010-01-30 18:00:36	dsDNA viruses, no RNA stage	Human adenovirus B2			Viruses	Adenoviridae	Mastadenovirus	Human mastadenovirus B
	401022369	31545	Viruses	no rank	Human adenovirus 55	714978	565303	2010-01-30 18:00:36	dsDNA viruses, no RNA stage	Human adenovirus B2			Viruses	Adenoviridae	Mastadenovirus	Human mastadenovirus B
	402173168	31878	Viruses	species	Human mastadenovirus B	108098	10509	1999-11-15 09:04:00	dsDNA viruses, no RNA stage				Viruses	Adenoviridae	Mastadenovirus
	402173208	31837	Viruses	species	Human mastadenovirus B	108098	10509	1999-11-15 09:04:00	dsDNA viruses, no RNA stage				Viruses	Adenoviridae	Mastadenovirus
	402173248	31832	Viruses	species	Human mastadenovirus B	108098	10509	1999-11-15 09:04:00	dsDNA viruses, no RNA stage				Viruses	Adenoviridae	Mastadenovirus
	402173288	31704	Viruses	species	Human mastadenovirus B	108098	10509	1999-11-15 09:04:00	dsDNA viruses, no RNA stage				Viruses	Adenoviridae	Mastadenovirus
	402173329	31665	Viruses	species	Human mastadenovirus B	108098	10509	1999-11-15 09:04:00	dsDNA viruses, no RNA stage				Viruses	Adenoviridae	Mastadenovirus
	402173369	31485	Viruses	species	Human mastadenovirus B	108098	10509	1999-11-15 09:04:00	dsDNA viruses, no RNA stage				Viruses	Adenoviridae	Mastadenovirus
	402173409	31144	Viruses	species	Human mastadenovirus B	108098	10509	1999-11-15 09:04:00	dsDNA viruses, no RNA stage				Viruses	Adenoviridae	Mastadenovirus
	402173449	31724	Viruses	species	Human mastadenovirus B	108098	10509	1999-11-15 09:04:00	dsDNA viruses, no RNA stage				Viruses	Adenoviridae	Mastadenovirus
	402173490	31675	Viruses	species	Human mastadenovirus B	108098	10509	1999-11-15 09:04:00	dsDNA viruses, no RNA stage				Viruses	Adenoviridae	Mastadenovirus
	402173531	3125	Viruses	species	Human mastadenovirus C	129951	10509	2000-06-22 13:18:00	dsDNA viruses, no RNA stage				Viruses	Adenoviridae	Mastadenovirus
	406678922	7420	Viruses	species	Human mastadenovirus C	129951	10509	2000-06-22 13:18:00	dsDNA viruses, no RNA stage				Viruses	Adenoviridae	Mastadenovirus
	406679016	4740	Viruses	species	Human mastadenovirus C	129951	10509	2000-06-22 13:18:00	dsDNA viruses, no RNA stage				Viruses	Adenoviridae	Mastadenovirus
	406679061	419	Viruses	species	Human mastadenovirus C	129951	10509	2000-06-22 13:18:00	dsDNA viruses, no RNA stage				Viruses	Adenoviridae	Mastadenovirus
	406679107	7293	Viruses	species	Human mastadenovirus C	129951	10509	2000-06-22 13:18:00	dsDNA viruses, no RNA stage				Viruses	Adenoviridae	Mastadenovirus
	406679152	7281	Viruses	species	Human mastadenovirus C	129951	10509	2000-06-22 13:18:00	dsDNA viruses, no RNA stage				Viruses	Adenoviridae	Mastadenovirus
	406679199	100	Viruses	species	Human mastadenovirus C	129951	10509	2000-06-22 13:18:00	dsDNA viruses, no RNA stage				Viruses	Adenoviridae	Mastadenovirus
	406679245	7283	Viruses	species	Human mastadenovirus C	129951	10509	2000-06-22 13:18:00	dsDNA viruses, no RNA stage				Viruses	Adenoviridae	Mastadenovirus
	406679291	7289	Viruses	species	Human mastadenovirus C	129951	10509	2000-06-22 13:18:00	dsDNA viruses, no RNA stage				Viruses	Adenoviridae	Mastadenovirus
	409974355	31669	Viruses	species	Human mastadenovirus B	108098	10509	1999-11-15 09:04:00	dsDNA viruses, no RNA stage				Viruses	Adenoviridae	Mastadenovirus
	410994801	31852	Viruses	no rank	Human adenovirus 7	10519	565302	1993-04-27 01:00:00	dsDNA viruses, no RNA stage	Human adenovirus B1			Viruses	Adenoviridae	Mastadenovirus	Human mastadenovirus B
	440382961	30024	Viruses	no rank	Bovine adenovirus 6	111167	130500	1999-12-30	dsDNA viruses, no RNA stage	unclassified Atadenovirus			Viruses	Adenoviridae	Atadenovirus	Bovine adenovirus E
	451352781	13863	Viruses	no rank	Human adenovirus 43	46938	130310	1996-05-20 01:00:00	dsDNA viruses, no RNA stage				Viruses	Adenoviridae	Mastadenovirus	Human mastadenovirus D
	451963838	31686	Viruses	no rank	Human adenovirus 14	10521	565303	1996-05-20 01:00:00	dsDNA viruses, no RNA stage	Human adenovirus B2			Viruses	Adenoviridae	Mastadenovirus	Human mastadenovirus B
	460042637	34302	Viruses	species	Simian adenovirus 20	585059	413684	2009-07-10 18:00:37	dsDNA viruses, no RNA stage	unclassified Simian adenoviruses			Viruses	Adenoviridae	Mastadenovirus
	482665707	7523	Viruses	species	Simian adenovirus B	1165908	413684	2012-03-22 18:00:54	dsDNA viruses, no RNA stage	unclassified Simian adenoviruses			Viruses	Adenoviridae	Mastadenovirus
	482665779	9359	Viruses	species	Simian adenovirus C	1324794	413684	2013-04-30 01:01:25	dsDNA viruses, no RNA stage	unclassified Simian adenoviruses			Viruses	Adenoviridae	Mastadenovirus
	485191057	34391	Viruses	species	Simian adenovirus C	1324794	413684	2013-04-30 01:01:25	dsDNA viruses, no RNA stage	unclassified Simian adenoviruses			Viruses	Adenoviridae	Mastadenovirus
	496838689	36838	Viruses	species	Titi monkey adenovirus ECC-2011	994672	189831	2011-07-22 18:00:48	dsDNA viruses, no RNA stage	unclassified Adenoviridae			Viruses	Adenoviridae
	501000341	45781	Viruses	no rank	Fowl adenovirus 5	172861	190062	2001-10-12 19:01:00	dsDNA viruses, no RNA stage				Viruses	Adenoviridae	Aviadenovirus	Fowl aviadenovirus B
	530801662	14466	Viruses	no rank	Human adenovirus 4	28280	130308	1993-04-28 01:00:00	dsDNA viruses, no RNA stage				Viruses	Adenoviridae	Mastadenovirus	Human mastadenovirus E
	532127457	31697	Viruses	species	Human mastadenovirus B	108098	10509	1999-11-15 09:04:00	dsDNA viruses, no RNA stage				Viruses	Adenoviridae	Mastadenovirus
	532127502	12701	Viruses	species	Human mastadenovirus D	130310	10509	2000-06-23 17:34:00	dsDNA viruses, no RNA stage				Viruses	Adenoviridae	Mastadenovirus
	532127546	31275	Viruses	species	Human mastadenovirus A	129875	10509	2000-06-21 14:42:00	dsDNA viruses, no RNA stage				Viruses	Adenoviridae	Mastadenovirus
	532127583	31823	Viruses	species	Human mastadenovirus B	108098	10509	1999-11-15 09:04:00	dsDNA viruses, no RNA stage				Viruses	Adenoviridae	Mastadenovirus
	532127626	31432	Viruses	species	Human mastadenovirus B	108098	10509	1999-11-15 09:04:00	dsDNA viruses, no RNA stage				Viruses	Adenoviridae	Mastadenovirus
	532127668	14505	Viruses	species	Human mastadenovirus D	130310	10509	2000-06-23 17:34:00	dsDNA viruses, no RNA stage				Viruses	Adenoviridae	Mastadenovirus
	532127714	31852	Viruses	species	Human mastadenovirus B	108098	10509	1999-11-15 09:04:00	dsDNA viruses, no RNA stage				Viruses	Adenoviridae	Mastadenovirus
	532127757	29372	Viruses	species	Human mastadenovirus B	108098	10509	1999-11-15 09:04:00	dsDNA viruses, no RNA stage				Viruses	Adenoviridae	Mastadenovirus
	532127799	31692	Viruses	species	Human mastadenovirus B	108098	10509	1999-11-15 09:04:00	dsDNA viruses, no RNA stage				Viruses	Adenoviridae	Mastadenovirus
	532127845	31702	Viruses	species	Human mastadenovirus B	108098	10509	1999-11-15 09:04:00	dsDNA viruses, no RNA stage				Viruses	Adenoviridae	Mastadenovirus
	532127889	7623	Viruses	species	Human mastadenovirus C	129951	10509	2000-06-22 13:18:00	dsDNA viruses, no RNA stage				Viruses	Adenoviridae	Mastadenovirus
	532127936	31703	Viruses	species	Human mastadenovirus B	108098	10509	1999-11-15 09:04:00	dsDNA viruses, no RNA stage				Viruses	Adenoviridae	Mastadenovirus
	532127979	6229	Viruses	species	Human mastadenovirus C	129951	10509	2000-06-22 13:18:00	dsDNA viruses, no RNA stage				Viruses	Adenoviridae	Mastadenovirus
	532128070	32043	Viruses	species	Human mastadenovirus B	108098	10509	1999-11-15 09:04:00	dsDNA viruses, no RNA stage				Viruses	Adenoviridae	Mastadenovirus
	532128113	31689	Viruses	species	Human mastadenovirus B	108098	10509	1999-11-15 09:04:00	dsDNA viruses, no RNA stage				Viruses	Adenoviridae	Mastadenovirus
	532128156	31834	Viruses	species	Human mastadenovirus B	108098	10509	1999-11-15 09:04:00	dsDNA viruses, no RNA stage				Viruses	Adenoviridae	Mastadenovirus
	532128199	31771	Viruses	species	Human mastadenovirus B	108098	10509	1999-11-15 09:04:00	dsDNA viruses, no RNA stage				Viruses	Adenoviridae	Mastadenovirus
	532128245	31705	Viruses	species	Human mastadenovirus B	108098	10509	1999-11-15 09:04:00	dsDNA viruses, no RNA stage				Viruses	Adenoviridae	Mastadenovirus
	532128330	31072	Viruses	species	Human mastadenovirus B	108098	10509	1999-11-15 09:04:00	dsDNA viruses, no RNA stage				Viruses	Adenoviridae	Mastadenovirus
	532128372	13870	Viruses	species	Human mastadenovirus D	130310	10509	2000-06-23 17:34:00	dsDNA viruses, no RNA stage				Viruses	Adenoviridae	Mastadenovirus
	532128418	13032	Viruses	species	Human mastadenovirus D	130310	10509	2000-06-23 17:34:00	dsDNA viruses, no RNA stage				Viruses	Adenoviridae	Mastadenovirus
	532128462	7552	Viruses	species	Human mastadenovirus C	129951	10509	2000-06-22 13:18:00	dsDNA viruses, no RNA stage				Viruses	Adenoviridae	Mastadenovirus
	532128550	12467	Viruses	species	Human mastadenovirus D	130310	10509	2000-06-23 17:34:00	dsDNA viruses, no RNA stage				Viruses	Adenoviridae	Mastadenovirus
	532128595	31730	Viruses	species	Human mastadenovirus B	108098	10509	1999-11-15 09:04:00	dsDNA viruses, no RNA stage				Viruses	Adenoviridae	Mastadenovirus
	532128638	13463	Viruses	species	Human mastadenovirus D	130310	10509	2000-06-23 17:34:00	dsDNA viruses, no RNA stage				Viruses	Adenoviridae	Mastadenovirus
	532128730	12689	Viruses	species	Human mastadenovirus D	130310	10509	2000-06-23 17:34:00	dsDNA viruses, no RNA stage				Viruses	Adenoviridae	Mastadenovirus
	532128775	13843	Viruses	species	Human mastadenovirus D	130310	10509	2000-06-23 17:34:00	dsDNA viruses, no RNA stage				Viruses	Adenoviridae	Mastadenovirus
	532128821	14847	Viruses	species	Human mastadenovirus D	130310	10509	2000-06-23 17:34:00	dsDNA viruses, no RNA stage				Viruses	Adenoviridae	Mastadenovirus
	532128867	14927	Viruses	species	Human mastadenovirus D	130310	10509	2000-06-23 17:34:00	dsDNA viruses, no RNA stage				Viruses	Adenoviridae	Mastadenovirus
	532128914	12008	Viruses	species	Human mastadenovirus D	130310	10509	2000-06-23 17:34:00	dsDNA viruses, no RNA stage				Viruses	Adenoviridae	Mastadenovirus
	532128959	31606	Viruses	species	Human mastadenovirus B	108098	10509	1999-11-15 09:04:00	dsDNA viruses, no RNA stage				Viruses	Adenoviridae	Mastadenovirus
	532129004	15265	Viruses	species	Human mastadenovirus D	130310	10509	2000-06-23 17:34:00	dsDNA viruses, no RNA stage				Viruses	Adenoviridae	Mastadenovirus
	532129049	31613	Viruses	species	Human mastadenovirus B	108098	10509	1999-11-15 09:04:00	dsDNA viruses, no RNA stage				Viruses	Adenoviridae	Mastadenovirus
	532129094	12957	Viruses	species	Human mastadenovirus D	130310	10509	2000-06-23 17:34:00	dsDNA viruses, no RNA stage				Viruses	Adenoviridae	Mastadenovirus
	532129187	31768	Viruses	species	Human mastadenovirus B	108098	10509	1999-11-15 09:04:00	dsDNA viruses, no RNA stage				Viruses	Adenoviridae	Mastadenovirus
	532129231	14606	Viruses	species	Human mastadenovirus D	130310	10509	2000-06-23 17:34:00	dsDNA viruses, no RNA stage				Viruses	Adenoviridae	Mastadenovirus
	532129277	12032	Viruses	species	Human mastadenovirus D	130310	10509	2000-06-23 17:34:00	dsDNA viruses, no RNA stage				Viruses	Adenoviridae	Mastadenovirus
	532129322	31804	Viruses	species	Human mastadenovirus B	108098	10509	1999-11-15 09:04:00	dsDNA viruses, no RNA stage				Viruses	Adenoviridae	Mastadenovirus
	532129368	32778	Viruses	species	Human mastadenovirus B	108098	10509	1999-11-15 09:04:00	dsDNA viruses, no RNA stage				Viruses	Adenoviridae	Mastadenovirus
	532129413	31792	Viruses	species	Human mastadenovirus B	108098	10509	1999-11-15 09:04:00	dsDNA viruses, no RNA stage				Viruses	Adenoviridae	Mastadenovirus
	532130058	14062	Viruses	species	Human mastadenovirus D	130310	10509	2000-06-23 17:34:00	dsDNA viruses, no RNA stage				Viruses	Adenoviridae	Mastadenovirus
	532130103	12477	Viruses	species	Human mastadenovirus D	130310	10509	2000-06-23 17:34:00	dsDNA viruses, no RNA stage				Viruses	Adenoviridae	Mastadenovirus
	532130148	14462	Viruses	species	Human mastadenovirus D	130310	10509	2000-06-23 17:34:00	dsDNA viruses, no RNA stage				Viruses	Adenoviridae	Mastadenovirus
	532130193	20590	Viruses	species	Human mastadenovirus D	130310	10509	2000-06-23 17:34:00	dsDNA viruses, no RNA stage				Viruses	Adenoviridae	Mastadenovirus
	532130194	15011	Viruses	species	Human mastadenovirus D	130310	10509	2000-06-23 17:34:00	dsDNA viruses, no RNA stage				Viruses	Adenoviridae	Mastadenovirus
	532130238	14704	Viruses	species	Human mastadenovirus D	130310	10509	2000-06-23 17:34:00	dsDNA viruses, no RNA stage				Viruses	Adenoviridae	Mastadenovirus
	532130330	14135	Viruses	species	Human mastadenovirus D	130310	10509	2000-06-23 17:34:00	dsDNA viruses, no RNA stage				Viruses	Adenoviridae	Mastadenovirus
	532130377	31183	Viruses	species	Human mastadenovirus B	108098	10509	1999-11-15 09:04:00	dsDNA viruses, no RNA stage				Viruses	Adenoviridae	Mastadenovirus
	532130419	12045	Viruses	species	Human mastadenovirus D	130310	10509	2000-06-23 17:34:00	dsDNA viruses, no RNA stage				Viruses	Adenoviridae	Mastadenovirus
	532130464	14948	Viruses	species	Human mastadenovirus D	130310	10509	2000-06-23 17:34:00	dsDNA viruses, no RNA stage				Viruses	Adenoviridae	Mastadenovirus
	532130510	11492	Viruses	species	Human mastadenovirus C	129951	10509	2000-06-22 13:18:00	dsDNA viruses, no RNA stage				Viruses	Adenoviridae	Mastadenovirus
	532130511	13929	Viruses	species	Human mastadenovirus D	130310	10509	2000-06-23 17:34:00	dsDNA viruses, no RNA stage				Viruses	Adenoviridae	Mastadenovirus
	532130556	12161	Viruses	species	Human mastadenovirus D	130310	10509	2000-06-23 17:34:00	dsDNA viruses, no RNA stage				Viruses	Adenoviridae	Mastadenovirus
	532130601	14626	Viruses	species	Human mastadenovirus D	130310	10509	2000-06-23 17:34:00	dsDNA viruses, no RNA stage				Viruses	Adenoviridae	Mastadenovirus
	532130645	13793	Viruses	species	Human mastadenovirus D	130310	10509	2000-06-23 17:34:00	dsDNA viruses, no RNA stage				Viruses	Adenoviridae	Mastadenovirus
	532130688	19191	Viruses	species	Human mastadenovirus D	130310	10509	2000-06-23 17:34:00	dsDNA viruses, no RNA stage				Viruses	Adenoviridae	Mastadenovirus
	532130689	11841	Viruses	species	Human mastadenovirus C	129951	10509	2000-06-22 13:18:00	dsDNA viruses, no RNA stage				Viruses	Adenoviridae	Mastadenovirus
	532130690	18038	Viruses	species	Human mastadenovirus D	130310	10509	2000-06-23 17:34:00	dsDNA viruses, no RNA stage				Viruses	Adenoviridae	Mastadenovirus
	532130691	15409	Viruses	species	Human mastadenovirus D	130310	10509	2000-06-23 17:34:00	dsDNA viruses, no RNA stage				Viruses	Adenoviridae	Mastadenovirus
	532130692	16004	Viruses	species	Human mastadenovirus D	130310	10509	2000-06-23 17:34:00	dsDNA viruses, no RNA stage				Viruses	Adenoviridae	Mastadenovirus
	532130693	31562	Viruses	species	Human mastadenovirus B	108098	10509	1999-11-15 09:04:00	dsDNA viruses, no RNA stage				Viruses	Adenoviridae	Mastadenovirus
	532130694	16657	Viruses	species	Human mastadenovirus D	130310	10509	2000-06-23 17:34:00	dsDNA viruses, no RNA stage				Viruses	Adenoviridae	Mastadenovirus
	532130695	15961	Viruses	species	Human mastadenovirus D	130310	10509	2000-06-23 17:34:00	dsDNA viruses, no RNA stage				Viruses	Adenoviridae	Mastadenovirus
	532130696	12423	Viruses	species	Human mastadenovirus D	130310	10509	2000-06-23 17:34:00	dsDNA viruses, no RNA stage				Viruses	Adenoviridae	Mastadenovirus
	532130740	31134	Viruses	species	Human mastadenovirus B	108098	10509	1999-11-15 09:04:00	dsDNA viruses, no RNA stage				Viruses	Adenoviridae	Mastadenovirus
	532130741	12299	Viruses	species	Human mastadenovirus D	130310	10509	2000-06-23 17:34:00	dsDNA viruses, no RNA stage				Viruses	Adenoviridae	Mastadenovirus
	532130742	7631	Viruses	species	Human mastadenovirus C	129951	10509	2000-06-22 13:18:00	dsDNA viruses, no RNA stage				Viruses	Adenoviridae	Mastadenovirus
	540155826	31967	Viruses	species	Simian adenovirus 18	909210	413684	2010-10-20 18:00:47	dsDNA viruses, no RNA stage	unclassified Simian adenoviruses			Viruses	Adenoviridae	Mastadenovirus
	542098354	34732	Viruses	species	Human mastadenovirus B	108098	10509	1999-11-15 09:04:00	dsDNA viruses, no RNA stage				Viruses	Adenoviridae	Mastadenovirus
	545693829	15873	Viruses	no rank	Human adenovirus 23	46925	130310	1996-05-20 01:00:00	dsDNA viruses, no RNA stage				Viruses	Adenoviridae	Mastadenovirus	Human mastadenovirus D
	555928177	42940	Viruses	species	Turkey adenovirus 4	1408257	280050	2013-10-28 01:01:39	dsDNA viruses, no RNA stage	unclassified Aviadenovirus			Viruses	Adenoviridae	Aviadenovirus
	555928211	43686	Viruses	species	Turkey adenovirus 5	1408258	280050	2013-10-28 01:01:39	dsDNA viruses, no RNA stage	unclassified Aviadenovirus			Viruses	Adenoviridae	Aviadenovirus
	567315454	25517	Viruses	no rank	Human adenovirus 41	10524	130309	1994-09-21 01:00:00	dsDNA viruses, no RNA stage				Viruses	Adenoviridae	Mastadenovirus	Human mastadenovirus F
	106006027	1027	Viruses	species	Cyprinid herpesvirus 3	180230	692606	2001-12-19 18:01:00	dsDNA viruses, no RNA stage				Viruses	Alloherpesviridae	Cyprinivirus		Herpesvirales
	109138081	2105	Viruses	species	Ranid herpesvirus 2	389214	692605	2006-06-20 18:00:23	dsDNA viruses, no RNA stage				Viruses	Alloherpesviridae	Batrachovirus		Herpesvirales
	109138229	819	Viruses	species	Ranid herpesvirus 1	85655	692605	1999-02-04	dsDNA viruses, no RNA stage				Viruses	Alloherpesviridae	Batrachovirus		Herpesvirales
	109638461	220859	Viruses	species	Ranid herpesvirus 1	85655	692605	1999-02-04	dsDNA viruses, no RNA stage				Viruses	Alloherpesviridae	Batrachovirus		Herpesvirales
	109638594	231801	Viruses	species	Ranid herpesvirus 2	389214	692605	2006-06-20 18:00:23	dsDNA viruses, no RNA stage				Viruses	Alloherpesviridae	Batrachovirus		Herpesvirales
	109706605	696	Viruses	species	Cyprinid herpesvirus 3	180230	692606	2001-12-19 18:01:00	dsDNA viruses, no RNA stage				Viruses	Alloherpesviridae	Cyprinivirus		Herpesvirales
	129560509	5330	Viruses	species	Cyprinid herpesvirus 3	180230	692606	2001-12-19 18:01:00	dsDNA viruses, no RNA stage				Viruses	Alloherpesviridae	Cyprinivirus		Herpesvirales
	131840030	295146	Viruses	species	Cyprinid herpesvirus 3	180230	692606	2001-12-19 18:01:00	dsDNA viruses, no RNA stage				Viruses	Alloherpesviridae	Cyprinivirus		Herpesvirales
	386685960	2135	Viruses	species	Cyprinid herpesvirus 1	317858	692606	2005-05-01 18:03:43	dsDNA viruses, no RNA stage				Viruses	Alloherpesviridae	Cyprinivirus		Herpesvirales
	386686104	2364	Viruses	species	Cyprinid herpesvirus 2	317878	692606	2005-05-01 18:03:43	dsDNA viruses, no RNA stage				Viruses	Alloherpesviridae	Cyprinivirus		Herpesvirales
	388260200	638	Viruses	species	Anguillid herpesvirus 1	150286	692606	2001-02-02 18:02:00	dsDNA viruses, no RNA stage				Viruses	Alloherpesviridae	Cyprinivirus		Herpesvirales
	388262476	248526	Viruses	species	Anguillid herpesvirus 1	150286	692606	2001-02-02 18:02:00	dsDNA viruses, no RNA stage				Viruses	Alloherpesviridae	Cyprinivirus		Herpesvirales
	422933554	291144	Viruses	species	Cyprinid herpesvirus 1	317858	692606	2005-05-01 18:03:43	dsDNA viruses, no RNA stage				Viruses	Alloherpesviridae	Cyprinivirus		Herpesvirales
	422933791	290304	Viruses	species	Cyprinid herpesvirus 2	317878	692606	2005-05-01 18:03:43	dsDNA viruses, no RNA stage				Viruses	Alloherpesviridae	Cyprinivirus		Herpesvirales
	519868059	2042	Viruses	species	Ictalurid herpesvirus 1	10401	172653	1993-08-02 01:00:00	dsDNA viruses, no RNA stage				Viruses	Alloherpesviridae	Ictalurivirus		Herpesvirales
	519904135	134226	Viruses	species	Ictalurid herpesvirus 1	10401	172653	1993-08-02 01:00:00	dsDNA viruses, no RNA stage				Viruses	Alloherpesviridae	Ictalurivirus		Herpesvirales
	780375	4865	Viruses	species	African swine fever virus	10497	39743	1993-04-23 01:00:00	dsDNA viruses, no RNA stage				Viruses	Asfarviridae	Asfivirus
	9628113	170101	Viruses	species	African swine fever virus	10497	39743	1993-04-23 01:00:00	dsDNA viruses, no RNA stage				Viruses	Asfarviridae	Asfivirus
	33772320	99133	Viruses	species	African swine fever virus	10497	39743	1993-04-23 01:00:00	dsDNA viruses, no RNA stage				Viruses	Asfarviridae	Asfivirus
	33772321	82011	Viruses	species	African swine fever virus	10497	39743	1993-04-23 01:00:00	dsDNA viruses, no RNA stage				Viruses	Asfarviridae	Asfivirus
	33772322	43922	Viruses	species	African swine fever virus	10497	39743	1993-04-23 01:00:00	dsDNA viruses, no RNA stage				Viruses	Asfarviridae	Asfivirus
	33772323	55490	Viruses	species	African swine fever virus	10497	39743	1993-04-23 01:00:00	dsDNA viruses, no RNA stage				Viruses	Asfarviridae	Asfivirus
	33772324	51560	Viruses	species	African swine fever virus	10497	39743	1993-04-23 01:00:00	dsDNA viruses, no RNA stage				Viruses	Asfarviridae	Asfivirus
	33772325	52197	Viruses	species	African swine fever virus	10497	39743	1993-04-23 01:00:00	dsDNA viruses, no RNA stage				Viruses	Asfarviridae	Asfivirus
	33772326	50591	Viruses	species	African swine fever virus	10497	39743	1993-04-23 01:00:00	dsDNA viruses, no RNA stage				Viruses	Asfarviridae	Asfivirus
	162849209	24363	Viruses	no rank	African swine fever virus Benin 97/1	443876	10497	2007-12-16 18:00:29	dsDNA viruses, no RNA stage				Viruses	Asfarviridae	Asfivirus	African swine fever virus
	162849383	16611	Viruses	no rank	African swine fever virus OURT 88/3	443878	10497	2007-12-16 18:00:29	dsDNA viruses, no RNA stage				Viruses	Asfarviridae	Asfivirus	African swine fever virus
	291289440	23766	Viruses	no rank	African swine fever virus E75	686262	10497	2010-03-20 18:00:42	dsDNA viruses, no RNA stage				Viruses	Asfarviridae	Asfivirus	African swine fever virus
	303398661	48370	Viruses	no rank	African swine fever virus Georgia 2007/1	874269	10497	2010-08-19 18:00:43	dsDNA viruses, no RNA stage				Viruses	Asfarviridae	Asfivirus	African swine fever virus
	59591	25137	Viruses	species	Human herpesvirus 5	10359	10358	1993-04-24 01:00:00	dsDNA viruses, no RNA stage				Viruses	Herpesviridae	Cytomegalovirus		Herpesvirales	Betaherpesvirinae
	59989	456	Viruses	no rank	Human herpesvirus 3 strain Dumas	10338	10335	1993-04-23 01:00:00	dsDNA viruses, no RNA stage				Viruses	Herpesviridae	Varicellovirus	Human herpesvirus 3	Herpesvirales	Alphaherpesvirinae
	60320	863	Viruses	species	Saimiriine herpesvirus 2	10381	10379	1993-04-23 01:00:00	dsDNA viruses, no RNA stage				Viruses	Herpesviridae	Rhadinovirus		Herpesvirales	Gammaherpesvirinae
	695172	5117	Viruses	species	Equid herpesvirus 2	12657	548688	1993-08-04 01:00:00	dsDNA viruses, no RNA stage				Viruses	Herpesviridae	Percavirus		Herpesvirales	Gammaherpesvirinae
	853961	2060	Viruses	species	Human herpesvirus 6	10368	431037	1993-05-05 01:00:00	dsDNA viruses, no RNA stage	unclassified Roseolovirus			Viruses	Herpesviridae	Roseolovirus		Herpesvirales	Betaherpesvirinae
	1236880	1414	Viruses	species	Human herpesvirus 7	10372	40272	1993-08-02 01:00:00	dsDNA viruses, no RNA stage				Viruses	Herpesviridae	Roseolovirus		Herpesvirales	Betaherpesvirinae
	1688100	1071	Viruses	species	Murid herpesvirus 1	10366	10365	1993-04-23 01:00:00	dsDNA viruses, no RNA stage				Viruses	Herpesviridae	Muromegalovirus		Herpesvirales	Betaherpesvirinae
	1944536	610	Viruses	species	Human herpesvirus 1	10298	10294	1993-04-23 01:00:00	dsDNA viruses, no RNA stage				Viruses	Herpesviridae	Simplexvirus		Herpesvirales	Alphaherpesvirinae
	2337967	1289	Viruses	species	Alcelaphine herpesvirus 1	35252	548687	1993-04-29 01:00:00	dsDNA viruses, no RNA stage				Viruses	Herpesviridae	Macavirus		Herpesvirales	Gammaherpesvirinae
	2605950	457	Viruses	species	Equid herpesvirus 4	10331	10319	1993-04-23 01:00:00	dsDNA viruses, no RNA stage				Viruses	Herpesviridae	Varicellovirus		Herpesvirales	Alphaherpesvirinae
	2653291	1261	Viruses	no rank	Bovine herpesvirus type 1.1	79889	10320	1998-07-29 14:42:00	dsDNA viruses, no RNA stage				Viruses	Herpesviridae	Varicellovirus	Bovine herpesvirus 1	Herpesvirales	Alphaherpesvirinae
	2746233	1501	Viruses	species	Human herpesvirus 7	10372	40272	1993-08-02 01:00:00	dsDNA viruses, no RNA stage				Viruses	Herpesviridae	Roseolovirus		Herpesvirales	Betaherpesvirinae
	4019231	464	Viruses	species	Ateline herpesvirus 3	85618	10379	1998-12-14	dsDNA viruses, no RNA stage				Viruses	Herpesviridae	Rhadinovirus		Herpesvirales	Gammaherpesvirinae
	4995977	7025	Viruses	species	Human herpesvirus 6B	32604	40272	1994-05-02 01:00:00	dsDNA viruses, no RNA stage				Viruses	Herpesviridae	Roseolovirus		Herpesvirales	Betaherpesvirinae
	5733510	2073	Viruses	species	Human herpesvirus 6B	32604	40272	1994-05-02 01:00:00	dsDNA viruses, no RNA stage				Viruses	Herpesviridae	Roseolovirus		Herpesvirales	Betaherpesvirinae
	6572414	454	Viruses	species	Human herpesvirus 2	10310	10294	1993-04-23 01:00:00	dsDNA viruses, no RNA stage				Viruses	Herpesviridae	Simplexvirus		Herpesvirales	Alphaherpesvirinae
	6625567	390	Viruses	species	Murid herpesvirus 4	33708	10379	1995-01-01	dsDNA viruses, no RNA stage				Viruses	Herpesviridae	Rhadinovirus		Herpesvirales	Gammaherpesvirinae
	7329990	8970	Viruses	no rank	Rhesus monkey rhadinovirus H26-95	69256	154334	1997-11-20	dsDNA viruses, no RNA stage				Viruses	Herpesviridae	Rhadinovirus	Macacine herpesvirus 5	Herpesvirales	Gammaherpesvirinae
	8714565	574	Viruses	no rank	Macaca mulatta rhadinovirus 17577	83534	154334	1999-03-24	dsDNA viruses, no RNA stage				Viruses	Herpesviridae	Rhadinovirus	Macacine herpesvirus 5	Herpesvirales	Gammaherpesvirinae
	9625875	124884	Viruses	species	Human herpesvirus 3	10335	10319	1993-04-23 01:00:00	dsDNA viruses, no RNA stage				Viruses	Herpesviridae	Varicellovirus		Herpesvirales	Alphaherpesvirinae
	9625955	112930	Viruses	species	Saimiriine herpesvirus 2	10381	10379	1993-04-23 01:00:00	dsDNA viruses, no RNA stage				Viruses	Herpesviridae	Rhadinovirus		Herpesvirales	Gammaherpesvirinae
	9628002	184427	Viruses	species	Equid herpesvirus 2	12657	548688	1993-08-04 01:00:00	dsDNA viruses, no RNA stage				Viruses	Herpesviridae	Percavirus		Herpesvirales	Gammaherpesvirinae
	9629267	154746	Viruses	species	Human herpesvirus 2	10310	10294	1993-04-23 01:00:00	dsDNA viruses, no RNA stage				Viruses	Herpesviridae	Simplexvirus		Herpesvirales	Alphaherpesvirinae
	9629378	152261	Viruses	species	Human herpesvirus 1	10298	10294	1993-04-23 01:00:00	dsDNA viruses, no RNA stage				Viruses	Herpesviridae	Simplexvirus		Herpesvirales	Alphaherpesvirinae
	9629732	145597	Viruses	species	Equid herpesvirus 4	10331	10319	1993-04-23 01:00:00	dsDNA viruses, no RNA stage				Viruses	Herpesviridae	Varicellovirus		Herpesvirales	Alphaherpesvirinae
	9629818	135301	Viruses	species	Bovine herpesvirus 1	10320	10319	1993-04-21 01:00:00	dsDNA viruses, no RNA stage				Viruses	Herpesviridae	Varicellovirus		Herpesvirales	Alphaherpesvirinae
	9631195	108409	Viruses	species	Ateline herpesvirus 3	85618	10379	1998-12-14	dsDNA viruses, no RNA stage				Viruses	Herpesviridae	Rhadinovirus		Herpesvirales	Gammaherpesvirinae
	9633069	162114	Viruses	species	Human herpesvirus 6B	32604	40272	1994-05-02 01:00:00	dsDNA viruses, no RNA stage				Viruses	Herpesviridae	Roseolovirus		Herpesvirales	Betaherpesvirinae
	10140926	130608	Viruses	species	Alcelaphine herpesvirus 1	35252	548687	1993-04-29 01:00:00	dsDNA viruses, no RNA stage				Viruses	Herpesviridae	Macavirus		Herpesvirales	Gammaherpesvirinae
	10180697	455	Viruses	species	Gallid herpesvirus 2	10390	180252	1993-04-23 01:00:00	dsDNA viruses, no RNA stage				Viruses	Herpesviridae	Mardivirus		Herpesvirales	Alphaherpesvirinae
	10799950	637	Viruses	species	Gallid herpesvirus 3	35250	180252	1993-07-26 01:00:00	dsDNA viruses, no RNA stage				Viruses	Herpesviridae	Mardivirus		Herpesvirales	Alphaherpesvirinae
	10834856	164270	Viruses	species	Gallid herpesvirus 3	35250	180252	1993-07-26 01:00:00	dsDNA viruses, no RNA stage				Viruses	Herpesviridae	Mardivirus		Herpesvirales	Alphaherpesvirinae
	11095830	1292	Viruses	species	Meleagrid herpesvirus 1	37108	180252	1994-04-14 01:00:00	dsDNA viruses, no RNA stage				Viruses	Herpesviridae	Mardivirus		Herpesvirales	Alphaherpesvirinae
	12025107	561	Viruses	species	Meleagrid herpesvirus 1	37108	180252	1994-04-14 01:00:00	dsDNA viruses, no RNA stage				Viruses	Herpesviridae	Mardivirus		Herpesvirales	Alphaherpesvirinae
	12084824	159160	Viruses	species	Meleagrid herpesvirus 1	37108	180252	1994-04-14 01:00:00	dsDNA viruses, no RNA stage				Viruses	Herpesviridae	Mardivirus		Herpesvirales	Alphaherpesvirinae
	12802528	356	Viruses	species	Bovine herpesvirus 4	10385	10379	1993-04-24 01:00:00	dsDNA viruses, no RNA stage				Viruses	Herpesviridae	Rhadinovirus		Herpesvirales	Gammaherpesvirinae
	13095578	108873	Viruses	species	Bovine herpesvirus 4	10385	10379	1993-04-24 01:00:00	dsDNA viruses, no RNA stage				Viruses	Herpesviridae	Rhadinovirus		Herpesvirales	Gammaherpesvirinae
	14210661	1634	Viruses	species	Tupaiid herpesvirus 1	10397	686603	1993-08-02 01:00:00	dsDNA viruses, no RNA stage	unassigned Betaherpesvirinae			Viruses	Herpesviridae			Herpesvirales	Betaherpesvirinae
	14250967	195859	Viruses	species	Tupaiid herpesvirus 1	10397	686603	1993-08-02 01:00:00	dsDNA viruses, no RNA stage	unassigned Betaherpesvirinae			Viruses	Herpesviridae			Herpesvirales	Betaherpesvirinae
	18025465	1212	Viruses	species	Macacine herpesvirus 4	45455	10375	1996-08-02 01:00:00	dsDNA viruses, no RNA stage				Viruses	Herpesviridae	Lymphocryptovirus		Herpesvirales	Gammaherpesvirinae
	18653809	133719	Viruses	species	Macacine herpesvirus 5	154334	10379	1999-09-05 01:00:00	dsDNA viruses, no RNA stage				Viruses	Herpesviridae	Rhadinovirus		Herpesvirales	Gammaherpesvirinae
	19881028	534	Viruses	species	Panine herpesvirus 2	188763	10358	2002-04-03 18:01:00	dsDNA viruses, no RNA stage				Viruses	Herpesviridae	Cytomegalovirus		Herpesvirales	Betaherpesvirinae
	20026600	241087	Viruses	species	Panine herpesvirus 2	188763	10358	2002-04-03 18:01:00	dsDNA viruses, no RNA stage				Viruses	Herpesviridae	Cytomegalovirus		Herpesvirales	Betaherpesvirinae
	20178619	1077	Viruses	no rank	Rat cytomegalovirus Maastricht	79700	28304	1998-10-17 01:00:00	dsDNA viruses, no RNA stage				Viruses	Herpesviridae	Muromegalovirus	Murid herpesvirus 2	Herpesvirales	Betaherpesvirinae
	20198505	230138	Viruses	species	Murid herpesvirus 2	28304	10365	1997-12-22	dsDNA viruses, no RNA stage				Viruses	Herpesviridae	Muromegalovirus		Herpesvirales	Betaherpesvirinae
	21716071	230278	Viruses	species	Murid herpesvirus 1	10366	10365	1993-04-23 01:00:00	dsDNA viruses, no RNA stage				Viruses	Herpesviridae	Muromegalovirus		Herpesvirales	Betaherpesvirinae
	24762296	799	Viruses	species	Callitrichine herpesvirus 3	106331	10375	1999-11-04	dsDNA viruses, no RNA stage				Viruses	Herpesviridae	Lymphocryptovirus		Herpesvirales	Gammaherpesvirinae
	24943089	149696	Viruses	species	Callitrichine herpesvirus 3	106331	10375	1999-11-04	dsDNA viruses, no RNA stage				Viruses	Herpesviridae	Lymphocryptovirus		Herpesvirales	Gammaherpesvirinae
	26665420	1250	Viruses	species	Human herpesvirus 3	10335	10319	1993-04-23 01:00:00	dsDNA viruses, no RNA stage				Viruses	Herpesviridae	Varicellovirus		Herpesvirales	Alphaherpesvirinae
	26665422	898	Viruses	species	Human herpesvirus 3	10335	10319	1993-04-23 01:00:00	dsDNA viruses, no RNA stage				Viruses	Herpesviridae	Varicellovirus		Herpesvirales	Alphaherpesvirinae
	30348501	24956	Viruses	species	Saimiriine herpesvirus 2	10381	10379	1993-04-23 01:00:00	dsDNA viruses, no RNA stage				Viruses	Herpesviridae	Rhadinovirus		Herpesvirales	Gammaherpesvirinae
	30844242	1973	Viruses	species	Macacine herpesvirus 1	10325	10294	1994-10-25 01:00:00	dsDNA viruses, no RNA stage				Viruses	Herpesviridae	Simplexvirus		Herpesvirales	Alphaherpesvirinae
	30984428	156789	Viruses	species	Macacine herpesvirus 1	10325	10294	1994-10-25 01:00:00	dsDNA viruses, no RNA stage				Viruses	Herpesviridae	Simplexvirus		Herpesvirales	Alphaherpesvirinae
	31377878	741	Viruses	no rank	Rhesus cytomegalovirus strain 68-1	103930	47929	1999-10-08 01:00:00	dsDNA viruses, no RNA stage				Viruses	Herpesviridae	Cytomegalovirus	Macacine herpesvirus 3	Herpesvirales	Betaherpesvirinae
	33772319	1798	Viruses	species	Bovine herpesvirus 5	35244	10319	1994-09-23 01:00:00	dsDNA viruses, no RNA stage				Viruses	Herpesviridae	Varicellovirus		Herpesvirales	Alphaherpesvirinae
	34500202	354	Viruses	species	Psittacid herpesvirus 1	50294	180255	1996-08-19 01:00:00	dsDNA viruses, no RNA stage				Viruses	Herpesviridae	Iltovirus		Herpesvirales	Alphaherpesvirinae
	37654163	27628	Viruses	species	Human herpesvirus 5	10359	10358	1993-04-24 01:00:00	dsDNA viruses, no RNA stage				Viruses	Herpesviridae	Cytomegalovirus		Herpesvirales	Betaherpesvirinae
	37777313	19921	Viruses	species	Human herpesvirus 5	10359	10358	1993-04-24 01:00:00	dsDNA viruses, no RNA stage				Viruses	Herpesviridae	Cytomegalovirus		Herpesvirales	Betaherpesvirinae
	37777314	19891	Viruses	species	Human herpesvirus 5	10359	10358	1993-04-24 01:00:00	dsDNA viruses, no RNA stage				Viruses	Herpesviridae	Cytomegalovirus		Herpesvirales	Betaherpesvirinae
	37777315	24846	Viruses	species	Human herpesvirus 5	10359	10358	1993-04-24 01:00:00	dsDNA viruses, no RNA stage				Viruses	Herpesviridae	Cytomegalovirus		Herpesvirales	Betaherpesvirinae
	37777316	22945	Viruses	species	Human herpesvirus 5	10359	10358	1993-04-24 01:00:00	dsDNA viruses, no RNA stage				Viruses	Herpesviridae	Cytomegalovirus		Herpesvirales	Betaherpesvirinae
	38093733	27401	Viruses	species	Human herpesvirus 5	10359	10358	1993-04-24 01:00:00	dsDNA viruses, no RNA stage				Viruses	Herpesviridae	Cytomegalovirus		Herpesvirales	Betaherpesvirinae
	38638196	163025	Viruses	species	Psittacid herpesvirus 1	50294	180255	1996-08-19 01:00:00	dsDNA viruses, no RNA stage				Viruses	Herpesviridae	Iltovirus		Herpesvirales	Alphaherpesvirinae
	40253942	2229	Viruses	species	Suid herpesvirus 1	10345	10319	1993-04-23 01:00:00	dsDNA viruses, no RNA stage				Viruses	Herpesviridae	Varicellovirus		Herpesvirales	Alphaherpesvirinae
	41387571	9351	Viruses	species	Gallid herpesvirus 2	10390	180252	1993-04-23 01:00:00	dsDNA viruses, no RNA stage				Viruses	Herpesviridae	Mardivirus		Herpesvirales	Alphaherpesvirinae
	42795127	1586	Viruses	species	Equid herpesvirus 1	10326	10319	1993-04-23 01:00:00	dsDNA viruses, no RNA stage				Viruses	Herpesviridae	Varicellovirus		Herpesvirales	Alphaherpesvirinae
	46519329	42260	Viruses	no rank	Macaca fuscata rhadinovirus	272551	154334	2005-04-26 18:03:04	dsDNA viruses, no RNA stage				Viruses	Herpesviridae	Rhadinovirus	Macacine herpesvirus 5	Herpesvirales	Gammaherpesvirinae
	46981409	1251	Viruses	species	Human herpesvirus 3	10335	10319	1993-04-23 01:00:00	dsDNA viruses, no RNA stage				Viruses	Herpesviridae	Varicellovirus		Herpesvirales	Alphaherpesvirinae
	46981482	683	Viruses	species	Human herpesvirus 3	10335	10319	1993-04-23 01:00:00	dsDNA viruses, no RNA stage				Viruses	Herpesviridae	Varicellovirus		Herpesvirales	Alphaherpesvirinae
	49349068	5152	Viruses	species	Gallid herpesvirus 2	10390	180252	1993-04-23 01:00:00	dsDNA viruses, no RNA stage				Viruses	Herpesviridae	Mardivirus		Herpesvirales	Alphaherpesvirinae
	49616984	640	Viruses	species	Equid herpesvirus 1	10326	10319	1993-04-23 01:00:00	dsDNA viruses, no RNA stage				Viruses	Herpesviridae	Varicellovirus		Herpesvirales	Alphaherpesvirinae
	50313241	150224	Viruses	species	Equid herpesvirus 1	10326	10319	1993-04-23 01:00:00	dsDNA viruses, no RNA stage				Viruses	Herpesviridae	Varicellovirus		Herpesvirales	Alphaherpesvirinae
	51518014	171096	Viruses	species	Macacine herpesvirus 4	45455	10375	1996-08-02 01:00:00	dsDNA viruses, no RNA stage				Viruses	Herpesviridae	Lymphocryptovirus		Herpesvirales	Gammaherpesvirinae
	51556461	221454	Viruses	species	Macacine herpesvirus 3	47929	10358	1996-07-11 01:00:00	dsDNA viruses, no RNA stage				Viruses	Herpesviridae	Cytomegalovirus		Herpesvirales	Betaherpesvirinae
	51557483	143461	Viruses	species	Suid herpesvirus 1	10345	10319	1993-04-23 01:00:00	dsDNA viruses, no RNA stage				Viruses	Herpesviridae	Varicellovirus		Herpesvirales	Alphaherpesvirinae
	51874225	153080	Viruses	species	Human herpesvirus 7	10372	40272	1993-08-02 01:00:00	dsDNA viruses, no RNA stage				Viruses	Herpesviridae	Roseolovirus		Herpesvirales	Betaherpesvirinae
	52843273	2062	Viruses	species	Cercopithecine herpesvirus 2	10317	10294	1993-08-02 01:00:00	dsDNA viruses, no RNA stage				Viruses	Herpesviridae	Simplexvirus		Herpesvirales	Alphaherpesvirinae
	56694721	150715	Viruses	species	Cercopithecine herpesvirus 2	10317	10294	1993-08-02 01:00:00	dsDNA viruses, no RNA stage				Viruses	Herpesviridae	Simplexvirus		Herpesvirales	Alphaherpesvirinae
	57790931	148687	Viruses	species	Gallid herpesvirus 1	10386	180255	1993-04-24 01:00:00	dsDNA viruses, no RNA stage				Viruses	Herpesviridae	Iltovirus		Herpesvirales	Alphaherpesvirinae
	61970953	1453	Viruses	species	Ovine herpesvirus 2	10398	548687	1993-08-02 01:00:00	dsDNA viruses, no RNA stage				Viruses	Herpesviridae	Macavirus		Herpesvirales	Gammaherpesvirinae
	66865971	1204	Viruses	species	Human herpesvirus 3	10335	10319	1993-04-23 01:00:00	dsDNA viruses, no RNA stage				Viruses	Herpesviridae	Varicellovirus		Herpesvirales	Alphaherpesvirinae
	66866043	796	Viruses	species	Human herpesvirus 3	10335	10319	1993-04-23 01:00:00	dsDNA viruses, no RNA stage				Viruses	Herpesviridae	Varicellovirus		Herpesvirales	Alphaherpesvirinae
	73695621	12811	Viruses	species	Macacine herpesvirus 3	47929	10358	1996-07-11 01:00:00	dsDNA viruses, no RNA stage				Viruses	Herpesviridae	Cytomegalovirus		Herpesvirales	Betaherpesvirinae
	75905720	2359	Viruses	species	Papiine herpesvirus 2	340907	10294	1994-10-25 01:00:00	dsDNA viruses, no RNA stage				Viruses	Herpesviridae	Simplexvirus		Herpesvirales	Alphaherpesvirinae
	78127836	4044	Viruses	species	Ovine herpesvirus 2	10398	548687	1993-08-02 01:00:00	dsDNA viruses, no RNA stage				Viruses	Herpesviridae	Macavirus		Herpesvirales	Gammaherpesvirinae
	82503188	171823	Viruses	species	Human herpesvirus 4	10376	10375	1993-04-23 01:00:00	dsDNA viruses, no RNA stage				Viruses	Herpesviridae	Lymphocryptovirus		Herpesvirales	Gammaherpesvirinae
	83642839	135135	Viruses	species	Ovine herpesvirus 2	10398	548687	1993-08-02 01:00:00	dsDNA viruses, no RNA stage				Viruses	Herpesviridae	Macavirus		Herpesvirales	Gammaherpesvirinae
	83721806	1009	Viruses	species	Human herpesvirus 3	10335	10319	1993-04-23 01:00:00	dsDNA viruses, no RNA stage				Viruses	Herpesviridae	Varicellovirus		Herpesvirales	Alphaherpesvirinae
	83722567	156487	Viruses	species	Papiine herpesvirus 2	340907	10294	1994-10-25 01:00:00	dsDNA viruses, no RNA stage				Viruses	Herpesviridae	Simplexvirus		Herpesvirales	Alphaherpesvirinae
	84519641	14840	Viruses	species	Human herpesvirus 4	10376	10375	1993-04-23 01:00:00	dsDNA viruses, no RNA stage				Viruses	Herpesviridae	Lymphocryptovirus		Herpesvirales	Gammaherpesvirinae
	86261677	12751	Viruses	species	Human herpesvirus 4	10376	10375	1993-04-23 01:00:00	dsDNA viruses, no RNA stage				Viruses	Herpesviridae	Lymphocryptovirus		Herpesvirales	Gammaherpesvirinae
	87196820	1130	Viruses	species	Human herpesvirus 8	37296	10379	1994-12-28	dsDNA viruses, no RNA stage				Viruses	Herpesviridae	Rhadinovirus		Herpesvirales	Gammaherpesvirinae
	90992797	967	Viruses	species	Human herpesvirus 3	10335	10319	1993-04-23 01:00:00	dsDNA viruses, no RNA stage				Viruses	Herpesviridae	Varicellovirus		Herpesvirales	Alphaherpesvirinae
	91980297	1042	Viruses	species	Human herpesvirus 3	10335	10319	1993-04-23 01:00:00	dsDNA viruses, no RNA stage				Viruses	Herpesviridae	Varicellovirus		Herpesvirales	Alphaherpesvirinae
	94481796	708	Viruses	species	Human herpesvirus 3	10335	10319	1993-04-23 01:00:00	dsDNA viruses, no RNA stage				Viruses	Herpesviridae	Varicellovirus		Herpesvirales	Alphaherpesvirinae
	94481870	682	Viruses	species	Human herpesvirus 3	10335	10319	1993-04-23 01:00:00	dsDNA viruses, no RNA stage				Viruses	Herpesviridae	Varicellovirus		Herpesvirales	Alphaherpesvirinae
	94481944	974	Viruses	species	Human herpesvirus 3	10335	10319	1993-04-23 01:00:00	dsDNA viruses, no RNA stage				Viruses	Herpesviridae	Varicellovirus		Herpesvirales	Alphaherpesvirinae
	94482018	811	Viruses	species	Human herpesvirus 3	10335	10319	1993-04-23 01:00:00	dsDNA viruses, no RNA stage				Viruses	Herpesviridae	Varicellovirus		Herpesvirales	Alphaherpesvirinae
	94482092	1481	Viruses	species	Human herpesvirus 3	10335	10319	1993-04-23 01:00:00	dsDNA viruses, no RNA stage				Viruses	Herpesviridae	Varicellovirus		Herpesvirales	Alphaherpesvirinae
	94482166	758	Viruses	species	Human herpesvirus 3	10335	10319	1993-04-23 01:00:00	dsDNA viruses, no RNA stage				Viruses	Herpesviridae	Varicellovirus		Herpesvirales	Alphaherpesvirinae
	94482240	755	Viruses	species	Human herpesvirus 3	10335	10319	1993-04-23 01:00:00	dsDNA viruses, no RNA stage				Viruses	Herpesviridae	Varicellovirus		Herpesvirales	Alphaherpesvirinae
	94482314	763	Viruses	species	Human herpesvirus 3	10335	10319	1993-04-23 01:00:00	dsDNA viruses, no RNA stage				Viruses	Herpesviridae	Varicellovirus		Herpesvirales	Alphaherpesvirinae
	94482388	615	Viruses	species	Human herpesvirus 3	10335	10319	1993-04-23 01:00:00	dsDNA viruses, no RNA stage				Viruses	Herpesviridae	Varicellovirus		Herpesvirales	Alphaherpesvirinae
	94482462	716	Viruses	species	Human herpesvirus 3	10335	10319	1993-04-23 01:00:00	dsDNA viruses, no RNA stage				Viruses	Herpesviridae	Varicellovirus		Herpesvirales	Alphaherpesvirinae
	94482536	767	Viruses	species	Human herpesvirus 3	10335	10319	1993-04-23 01:00:00	dsDNA viruses, no RNA stage				Viruses	Herpesviridae	Varicellovirus		Herpesvirales	Alphaherpesvirinae
	104303917	2371	Viruses	species	Gallid herpesvirus 2	10390	180252	1993-04-23 01:00:00	dsDNA viruses, no RNA stage				Viruses	Herpesviridae	Mardivirus		Herpesvirales	Alphaherpesvirinae
	111184725	758	Viruses	species	Human herpesvirus 3	10335	10319	1993-04-23 01:00:00	dsDNA viruses, no RNA stage				Viruses	Herpesviridae	Varicellovirus		Herpesvirales	Alphaherpesvirinae
	114782444	390	Viruses	species	Murid herpesvirus 4	33708	10379	1995-01-01	dsDNA viruses, no RNA stage				Viruses	Herpesviridae	Rhadinovirus		Herpesvirales	Gammaherpesvirinae
	123318702	137821	Viruses	species	Bovine herpesvirus 5	35244	10319	1994-09-23 01:00:00	dsDNA viruses, no RNA stage				Viruses	Herpesviridae	Varicellovirus		Herpesvirales	Alphaherpesvirinae
	124110108	356	Viruses	species	Cercopithecine herpesvirus 9	35246	10319	1993-07-26 01:00:00	dsDNA viruses, no RNA stage				Viruses	Herpesviridae	Varicellovirus		Herpesvirales	Alphaherpesvirinae
	124303521	22516	Viruses	species	Human herpesvirus 5	10359	10358	1993-04-24 01:00:00	dsDNA viruses, no RNA stage				Viruses	Herpesviridae	Cytomegalovirus		Herpesvirales	Betaherpesvirinae
	125745044	177874	Viruses	species	Gallid herpesvirus 2	10390	180252	1993-04-23 01:00:00	dsDNA viruses, no RNA stage				Viruses	Herpesviridae	Mardivirus		Herpesvirales	Alphaherpesvirinae
	126882977	124784	Viruses	species	Cercopithecine herpesvirus 9	35246	10319	1993-07-26 01:00:00	dsDNA viruses, no RNA stage				Viruses	Herpesviridae	Varicellovirus		Herpesvirales	Alphaherpesvirinae
	139424470	172764	Viruses	no rank	Human herpesvirus 4 type 2	12509	10376	1994-04-29 01:00:00	dsDNA viruses, no RNA stage				Viruses	Herpesviridae	Lymphocryptovirus	Human herpesvirus 4	Herpesvirales	Gammaherpesvirinae
	139472801	137969	Viruses	species	Human herpesvirus 8	37296	10379	1994-12-28	dsDNA viruses, no RNA stage				Viruses	Herpesviridae	Rhadinovirus		Herpesvirales	Gammaherpesvirinae
	146261990	119451	Viruses	species	Murid herpesvirus 4	33708	10379	1995-01-01	dsDNA viruses, no RNA stage				Viruses	Herpesviridae	Rhadinovirus		Herpesvirales	Gammaherpesvirinae
	148806278	1988	Viruses	species	Gallid herpesvirus 2	10390	180252	1993-04-23 01:00:00	dsDNA viruses, no RNA stage				Viruses	Herpesviridae	Mardivirus		Herpesvirales	Alphaherpesvirinae
	155573622	235646	Viruses	species	Human herpesvirus 5	10359	10358	1993-04-24 01:00:00	dsDNA viruses, no RNA stage				Viruses	Herpesviridae	Cytomegalovirus		Herpesvirales	Betaherpesvirinae
	155573956	636	Viruses	species	Human herpesvirus 5	10359	10358	1993-04-24 01:00:00	dsDNA viruses, no RNA stage				Viruses	Herpesviridae	Cytomegalovirus		Herpesvirales	Betaherpesvirinae
	157676102	7293	Viruses	no rank	Murine cytomegalovirus (strain K181)	69156	10366	1997-11-04 14:25:00	dsDNA viruses, no RNA stage				Viruses	Herpesviridae	Muromegalovirus	Murid herpesvirus 1	Herpesvirales	Betaherpesvirinae
	157779983	23873	Viruses	species	Human herpesvirus 5	10359	10358	1993-04-24 01:00:00	dsDNA viruses, no RNA stage				Viruses	Herpesviridae	Cytomegalovirus		Herpesvirales	Betaherpesvirinae
	157965723	585	Viruses	species	Human herpesvirus 3	10335	10319	1993-04-23 01:00:00	dsDNA viruses, no RNA stage				Viruses	Herpesviridae	Varicellovirus		Herpesvirales	Alphaherpesvirinae
	190886620	17070	Viruses	no rank	Muromegalovirus G4	524650	10366	2008-06-25 18:00:21	dsDNA viruses, no RNA stage				Viruses	Herpesviridae	Muromegalovirus	Murid herpesvirus 1	Herpesvirales	Betaherpesvirinae
	190886782	19133	Viruses	no rank	Muromegalovirus WP15B	524651	10366	2008-06-25 18:00:21	dsDNA viruses, no RNA stage				Viruses	Herpesviridae	Muromegalovirus	Murid herpesvirus 1	Herpesvirales	Betaherpesvirinae
	190886947	18054	Viruses	no rank	Muromegalovirus C4A	524649	10366	2008-06-25 18:00:21	dsDNA viruses, no RNA stage				Viruses	Herpesviridae	Muromegalovirus	Murid herpesvirus 1	Herpesvirales	Betaherpesvirinae
	194750320	3778	Viruses	species	Gallid herpesvirus 2	10390	180252	1993-04-23 01:00:00	dsDNA viruses, no RNA stage				Viruses	Herpesviridae	Mardivirus		Herpesvirales	Alphaherpesvirinae
	216410006	460	Viruses	species	Equid herpesvirus 9	55744	10319	1996-12-31 13:55:00	dsDNA viruses, no RNA stage				Viruses	Herpesviridae	Varicellovirus		Herpesvirales	Alphaherpesvirinae
	216905852	148371	Viruses	species	Equid herpesvirus 9	55744	10319	1996-12-31 13:55:00	dsDNA viruses, no RNA stage				Viruses	Herpesviridae	Varicellovirus		Herpesvirales	Alphaherpesvirinae
	219879600	23464	Viruses	species	Human herpesvirus 5	10359	10358	1993-04-24 01:00:00	dsDNA viruses, no RNA stage				Viruses	Herpesviridae	Cytomegalovirus		Herpesvirales	Betaherpesvirinae
	222354438	22841	Viruses	species	Human herpesvirus 5	10359	10358	1993-04-24 01:00:00	dsDNA viruses, no RNA stage				Viruses	Herpesviridae	Cytomegalovirus		Herpesvirales	Betaherpesvirinae
	222478328	14469	Viruses	species	Human herpesvirus 1	10298	10294	1993-04-23 01:00:00	dsDNA viruses, no RNA stage				Viruses	Herpesviridae	Simplexvirus		Herpesvirales	Alphaherpesvirinae
	224020395	159322	Viruses	species	Human herpesvirus 6A	32603	40272	1994-05-02 01:00:00	dsDNA viruses, no RNA stage				Viruses	Herpesviridae	Roseolovirus		Herpesvirales	Betaherpesvirinae
	239909366	30672	Viruses	species	Human herpesvirus 5	10359	10358	1993-04-24 01:00:00	dsDNA viruses, no RNA stage				Viruses	Herpesviridae	Cytomegalovirus		Herpesvirales	Betaherpesvirinae
	242345614	23962	Viruses	species	Human herpesvirus 5	10359	10358	1993-04-24 01:00:00	dsDNA viruses, no RNA stage				Viruses	Herpesviridae	Cytomegalovirus		Herpesvirales	Betaherpesvirinae
	242345780	23176	Viruses	species	Human herpesvirus 5	10359	10358	1993-04-24 01:00:00	dsDNA viruses, no RNA stage				Viruses	Herpesviridae	Cytomegalovirus		Herpesvirales	Betaherpesvirinae
	242554068	15387	Viruses	species	Human herpesvirus 5	10359	10358	1993-04-24 01:00:00	dsDNA viruses, no RNA stage				Viruses	Herpesviridae	Cytomegalovirus		Herpesvirales	Betaherpesvirinae
	254770867	25056	Viruses	species	Human herpesvirus 5	10359	10358	1993-04-24 01:00:00	dsDNA viruses, no RNA stage				Viruses	Herpesviridae	Cytomegalovirus		Herpesvirales	Betaherpesvirinae
	254771033	26890	Viruses	species	Human herpesvirus 5	10359	10358	1993-04-24 01:00:00	dsDNA viruses, no RNA stage				Viruses	Herpesviridae	Cytomegalovirus		Herpesvirales	Betaherpesvirinae
	254839979	1071	Viruses	species	Anatid herpesvirus 1	104388	180252	1998-02-23	dsDNA viruses, no RNA stage				Viruses	Herpesviridae	Mardivirus		Herpesvirales	Alphaherpesvirinae
	255683134	158091	Viruses	species	Anatid herpesvirus 1	104388	180252	1998-02-23	dsDNA viruses, no RNA stage				Viruses	Herpesviridae	Mardivirus		Herpesvirales	Alphaherpesvirinae
	256557007	21573	Viruses	species	Human herpesvirus 5	10359	10358	1993-04-24 01:00:00	dsDNA viruses, no RNA stage				Viruses	Herpesviridae	Cytomegalovirus		Herpesvirales	Betaherpesvirinae
	261853473	1363	Viruses	species	Human herpesvirus 8	37296	10379	1994-12-28	dsDNA viruses, no RNA stage				Viruses	Herpesviridae	Rhadinovirus		Herpesvirales	Gammaherpesvirinae
	262285050	104375	Viruses	no rank	Wood mouse herpesvirus	432370	33708	2008-07-30 18:00:21	dsDNA viruses, no RNA stage				Viruses	Herpesviridae	Rhadinovirus	Murid herpesvirus 4	Herpesvirales	Gammaherpesvirinae
	270000249	586	Viruses	species	Felid herpesvirus 1	10334	10319	1993-08-02 01:00:00	dsDNA viruses, no RNA stage				Viruses	Herpesviridae	Varicellovirus		Herpesvirales	Alphaherpesvirinae
	270311373	9750	Viruses	species	Human herpesvirus 5	10359	10358	1993-04-24 01:00:00	dsDNA viruses, no RNA stage				Viruses	Herpesviridae	Cytomegalovirus		Herpesvirales	Betaherpesvirinae
	270355593	23965	Viruses	species	Human herpesvirus 5	10359	10358	1993-04-24 01:00:00	dsDNA viruses, no RNA stage				Viruses	Herpesviridae	Cytomegalovirus		Herpesvirales	Betaherpesvirinae
	270355759	21857	Viruses	species	Human herpesvirus 5	10359	10358	1993-04-24 01:00:00	dsDNA viruses, no RNA stage				Viruses	Herpesviridae	Cytomegalovirus		Herpesvirales	Betaherpesvirinae
	270355925	21051	Viruses	species	Human herpesvirus 5	10359	10358	1993-04-24 01:00:00	dsDNA viruses, no RNA stage				Viruses	Herpesviridae	Cytomegalovirus		Herpesvirales	Betaherpesvirinae
	270356091	23229	Viruses	species	Human herpesvirus 5	10359	10358	1993-04-24 01:00:00	dsDNA viruses, no RNA stage				Viruses	Herpesviridae	Cytomegalovirus		Herpesvirales	Betaherpesvirinae
	281190771	135797	Viruses	species	Felid herpesvirus 1	10334	10319	1993-08-02 01:00:00	dsDNA viruses, no RNA stage				Viruses	Herpesviridae	Varicellovirus		Herpesvirales	Alphaherpesvirinae
	289547215	2498	Viruses	species	Murid herpesvirus 1	10366	10365	1993-04-23 01:00:00	dsDNA viruses, no RNA stage				Viruses	Herpesviridae	Muromegalovirus		Herpesvirales	Betaherpesvirinae
	290564358	21743	Viruses	species	Human herpesvirus 5	10359	10358	1993-04-24 01:00:00	dsDNA viruses, no RNA stage				Viruses	Herpesviridae	Cytomegalovirus		Herpesvirales	Betaherpesvirinae
	290766003	3213	Viruses	species	Human herpesvirus 1	10298	10294	1993-04-23 01:00:00	dsDNA viruses, no RNA stage				Viruses	Herpesviridae	Simplexvirus		Herpesvirales	Alphaherpesvirinae
	290766081	4002	Viruses	species	Human herpesvirus 1	10298	10294	1993-04-23 01:00:00	dsDNA viruses, no RNA stage				Viruses	Herpesviridae	Simplexvirus		Herpesvirales	Alphaherpesvirinae
	294488342	28559	Viruses	species	Human herpesvirus 5	10359	10358	1993-04-24 01:00:00	dsDNA viruses, no RNA stage				Viruses	Herpesviridae	Cytomegalovirus		Herpesvirales	Betaherpesvirinae
	308096431	702	Viruses	species	Saimiriine herpesvirus 1	10353	10294	1993-07-26 01:00:00	dsDNA viruses, no RNA stage				Viruses	Herpesviridae	Simplexvirus		Herpesvirales	Alphaherpesvirinae
	312162798	156742	Viruses	species	Saimiriine herpesvirus 1	10353	10294	1993-07-26 01:00:00	dsDNA viruses, no RNA stage				Viruses	Herpesviridae	Simplexvirus		Herpesvirales	Alphaherpesvirinae
	312275140	2371	Viruses	species	Human herpesvirus 8	37296	10379	1994-12-28	dsDNA viruses, no RNA stage				Viruses	Herpesviridae	Rhadinovirus		Herpesvirales	Gammaherpesvirinae
	317160499	25481	Viruses	species	Human herpesvirus 5	10359	10358	1993-04-24 01:00:00	dsDNA viruses, no RNA stage				Viruses	Herpesviridae	Cytomegalovirus		Herpesvirales	Betaherpesvirinae
	320332449	702	Viruses	species	Rodent herpesvirus Peru	948669	35249	2011-02-16 18:00:32	dsDNA viruses, no RNA stage	unclassified Gammaherpesvirinae			Viruses	Herpesviridae			Herpesvirales	Gammaherpesvirinae
	320332532	697	Viruses	species	Rodent herpesvirus Peru	948669	35249	2011-02-16 18:00:32	dsDNA viruses, no RNA stage	unclassified Gammaherpesvirinae			Viruses	Herpesviridae			Herpesvirales	Gammaherpesvirinae
	321496547	124335	Viruses	species	Rodent herpesvirus Peru	948669	35249	2011-02-16 18:00:32	dsDNA viruses, no RNA stage	unclassified Gammaherpesvirinae			Viruses	Herpesviridae			Herpesvirales	Gammaherpesvirinae
	324039461	1567	Viruses	species	Caviid herpesvirus 2	33706	686603	1994-03-13	dsDNA viruses, no RNA stage	unassigned Betaherpesvirinae			Viruses	Herpesviridae			Herpesvirales	Betaherpesvirinae
	329754414	7629	Viruses	species	Gallid herpesvirus 1	10386	180255	1993-04-24 01:00:00	dsDNA viruses, no RNA stage				Viruses	Herpesviridae	Iltovirus		Herpesvirales	Alphaherpesvirinae
	336091060	5465	Viruses	species	Gallid herpesvirus 3	35250	180252	1993-07-26 01:00:00	dsDNA viruses, no RNA stage				Viruses	Herpesviridae	Mardivirus		Herpesvirales	Alphaherpesvirinae
	342360510	2722	Viruses	species	Bovine herpesvirus 4	10385	10379	1993-04-24 01:00:00	dsDNA viruses, no RNA stage				Viruses	Herpesviridae	Rhadinovirus		Herpesvirales	Gammaherpesvirinae
	343797146	10535	Viruses	species	Suid herpesvirus 1	10345	10319	1993-04-23 01:00:00	dsDNA viruses, no RNA stage				Viruses	Herpesviridae	Varicellovirus		Herpesvirales	Alphaherpesvirinae
	343797212	4814	Viruses	species	Suid herpesvirus 1	10345	10319	1993-04-23 01:00:00	dsDNA viruses, no RNA stage				Viruses	Herpesviridae	Varicellovirus		Herpesvirales	Alphaherpesvirinae
	343797282	15595	Viruses	species	Suid herpesvirus 1	10345	10319	1993-04-23 01:00:00	dsDNA viruses, no RNA stage				Viruses	Herpesviridae	Varicellovirus		Herpesvirales	Alphaherpesvirinae
	345287010	5398	Viruses	species	Anatid herpesvirus 1	104388	180252	1998-02-23	dsDNA viruses, no RNA stage				Viruses	Herpesviridae	Mardivirus		Herpesvirales	Alphaherpesvirinae
	350606646	656	Viruses	species	Cynomolgus macaque cytomegalovirus strain Ottawa	944969	342596	2011-01-18 18:00:29	dsDNA viruses, no RNA stage	unclassified Cytomegalovirus			Viruses	Herpesviridae	Cytomegalovirus		Herpesvirales	Betaherpesvirinae
	353260843	854	Viruses	species	Human herpesvirus 1	10298	10294	1993-04-23 01:00:00	dsDNA viruses, no RNA stage				Viruses	Herpesviridae	Simplexvirus		Herpesvirales	Alphaherpesvirinae
	354550159	4900	Viruses	species	Gallid herpesvirus 1	10386	180255	1993-04-24 01:00:00	dsDNA viruses, no RNA stage				Viruses	Herpesviridae	Iltovirus		Herpesvirales	Alphaherpesvirinae
	354550239	5047	Viruses	species	Gallid herpesvirus 1	10386	180255	1993-04-24 01:00:00	dsDNA viruses, no RNA stage				Viruses	Herpesviridae	Iltovirus		Herpesvirales	Alphaherpesvirinae
	356640291	218041	Viruses	species	Cynomolgus macaque cytomegalovirus strain Ottawa	944969	342596	2011-01-18 18:00:29	dsDNA viruses, no RNA stage	unclassified Cytomegalovirus			Viruses	Herpesviridae	Cytomegalovirus		Herpesvirales	Betaherpesvirinae
	359730200	2402	Viruses	no rank	Gallid herpesvirus 2 strain 814	1123959	10390	2011-12-13 18:00:53	dsDNA viruses, no RNA stage				Viruses	Herpesviridae	Mardivirus	Gallid herpesvirus 2	Herpesvirales	Alphaherpesvirinae
	359831713	906	Viruses	species	Cercopithecine herpesvirus 5	50292	10358	1996-08-19 01:00:00	dsDNA viruses, no RNA stage				Viruses	Herpesviridae	Cytomegalovirus		Herpesvirales	Betaherpesvirinae
	359831897	40420	Viruses	species	Cercopithecine herpesvirus 5	50292	10358	1996-08-19 01:00:00	dsDNA viruses, no RNA stage				Viruses	Herpesviridae	Cytomegalovirus		Herpesvirales	Betaherpesvirinae
	359832077	2643	Viruses	species	Aotine herpesvirus 1	50290	10358	1996-08-19 01:00:00	dsDNA viruses, no RNA stage				Viruses	Herpesviridae	Cytomegalovirus		Herpesvirales	Betaherpesvirinae
	359832231	818	Viruses	species	Saimiriine herpesvirus 4	1535247	10358	2014-08-15 13:02:06	dsDNA viruses, no RNA stage				Viruses	Herpesviridae	Cytomegalovirus		Herpesvirales	Betaherpesvirinae
	359946431	226205	Viruses	species	Cercopithecine herpesvirus 5	50292	10358	1996-08-19 01:00:00	dsDNA viruses, no RNA stage				Viruses	Herpesviridae	Cytomegalovirus		Herpesvirales	Betaherpesvirinae
	360040900	219474	Viruses	species	Aotine herpesvirus 1	50290	10358	1996-08-19 01:00:00	dsDNA viruses, no RNA stage				Viruses	Herpesviridae	Cytomegalovirus		Herpesvirales	Betaherpesvirinae
	360086494	196691	Viruses	species	Saimiriine herpesvirus 4	1535247	10358	2014-08-15 13:02:06	dsDNA viruses, no RNA stage				Viruses	Herpesviridae	Cytomegalovirus		Herpesvirales	Betaherpesvirinae
	365735186	39529	Viruses	no rank	Macaca fuscata rhadinovirus	272551	154334	2005-04-26 18:03:04	dsDNA viruses, no RNA stage				Viruses	Herpesviridae	Rhadinovirus	Macacine herpesvirus 5	Herpesvirales	Gammaherpesvirinae
	365735357	39794	Viruses	no rank	Macaca fuscata rhadinovirus	272551	154334	2005-04-26 18:03:04	dsDNA viruses, no RNA stage				Viruses	Herpesviridae	Rhadinovirus	Macacine herpesvirus 5	Herpesvirales	Gammaherpesvirinae
	365751834	604	Viruses	species	Human herpesvirus 3	10335	10319	1993-04-23 01:00:00	dsDNA viruses, no RNA stage				Viruses	Herpesviridae	Varicellovirus		Herpesvirales	Alphaherpesvirinae
	365751907	776	Viruses	species	Human herpesvirus 3	10335	10319	1993-04-23 01:00:00	dsDNA viruses, no RNA stage				Viruses	Herpesviridae	Varicellovirus		Herpesvirales	Alphaherpesvirinae
	365751980	781	Viruses	species	Human herpesvirus 3	10335	10319	1993-04-23 01:00:00	dsDNA viruses, no RNA stage				Viruses	Herpesviridae	Varicellovirus		Herpesvirales	Alphaherpesvirinae
	365752053	456	Viruses	species	Human herpesvirus 3	10335	10319	1993-04-23 01:00:00	dsDNA viruses, no RNA stage				Viruses	Herpesviridae	Varicellovirus		Herpesvirales	Alphaherpesvirinae
	365752126	460	Viruses	species	Human herpesvirus 3	10335	10319	1993-04-23 01:00:00	dsDNA viruses, no RNA stage				Viruses	Herpesviridae	Varicellovirus		Herpesvirales	Alphaherpesvirinae
	365752199	806	Viruses	species	Human herpesvirus 3	10335	10319	1993-04-23 01:00:00	dsDNA viruses, no RNA stage				Viruses	Herpesviridae	Varicellovirus		Herpesvirales	Alphaherpesvirinae
	365752272	456	Viruses	species	Human herpesvirus 3	10335	10319	1993-04-23 01:00:00	dsDNA viruses, no RNA stage				Viruses	Herpesviridae	Varicellovirus		Herpesvirales	Alphaherpesvirinae
	365752345	715	Viruses	species	Human herpesvirus 3	10335	10319	1993-04-23 01:00:00	dsDNA viruses, no RNA stage				Viruses	Herpesviridae	Varicellovirus		Herpesvirales	Alphaherpesvirinae
	365752418	706	Viruses	species	Human herpesvirus 3	10335	10319	1993-04-23 01:00:00	dsDNA viruses, no RNA stage				Viruses	Herpesviridae	Varicellovirus		Herpesvirales	Alphaherpesvirinae
	365752491	949	Viruses	species	Human herpesvirus 3	10335	10319	1993-04-23 01:00:00	dsDNA viruses, no RNA stage				Viruses	Herpesviridae	Varicellovirus		Herpesvirales	Alphaherpesvirinae
	365752564	582	Viruses	species	Human herpesvirus 3	10335	10319	1993-04-23 01:00:00	dsDNA viruses, no RNA stage				Viruses	Herpesviridae	Varicellovirus		Herpesvirales	Alphaherpesvirinae
	365752637	1123	Viruses	species	Human herpesvirus 3	10335	10319	1993-04-23 01:00:00	dsDNA viruses, no RNA stage				Viruses	Herpesviridae	Varicellovirus		Herpesvirales	Alphaherpesvirinae
	365752710	791	Viruses	species	Human herpesvirus 3	10335	10319	1993-04-23 01:00:00	dsDNA viruses, no RNA stage				Viruses	Herpesviridae	Varicellovirus		Herpesvirales	Alphaherpesvirinae
	365752783	965	Viruses	species	Human herpesvirus 3	10335	10319	1993-04-23 01:00:00	dsDNA viruses, no RNA stage				Viruses	Herpesviridae	Varicellovirus		Herpesvirales	Alphaherpesvirinae
	365752856	776	Viruses	species	Human herpesvirus 3	10335	10319	1993-04-23 01:00:00	dsDNA viruses, no RNA stage				Viruses	Herpesviridae	Varicellovirus		Herpesvirales	Alphaherpesvirinae
	365752929	921	Viruses	species	Human herpesvirus 3	10335	10319	1993-04-23 01:00:00	dsDNA viruses, no RNA stage				Viruses	Herpesviridae	Varicellovirus		Herpesvirales	Alphaherpesvirinae
	365753002	874	Viruses	species	Human herpesvirus 3	10335	10319	1993-04-23 01:00:00	dsDNA viruses, no RNA stage				Viruses	Herpesviridae	Varicellovirus		Herpesvirales	Alphaherpesvirinae
	365753075	719	Viruses	species	Human herpesvirus 3	10335	10319	1993-04-23 01:00:00	dsDNA viruses, no RNA stage				Viruses	Herpesviridae	Varicellovirus		Herpesvirales	Alphaherpesvirinae
	365753148	637	Viruses	species	Human herpesvirus 3	10335	10319	1993-04-23 01:00:00	dsDNA viruses, no RNA stage				Viruses	Herpesviridae	Varicellovirus		Herpesvirales	Alphaherpesvirinae
	365753221	673	Viruses	species	Human herpesvirus 3	10335	10319	1993-04-23 01:00:00	dsDNA viruses, no RNA stage				Viruses	Herpesviridae	Varicellovirus		Herpesvirales	Alphaherpesvirinae
	365753294	918	Viruses	species	Human herpesvirus 3	10335	10319	1993-04-23 01:00:00	dsDNA viruses, no RNA stage				Viruses	Herpesviridae	Varicellovirus		Herpesvirales	Alphaherpesvirinae
	371782284	17035	Viruses	species	Murid herpesvirus 1	10366	10365	1993-04-23 01:00:00	dsDNA viruses, no RNA stage				Viruses	Herpesviridae	Muromegalovirus		Herpesvirales	Betaherpesvirinae
	371782449	14259	Viruses	species	Murid herpesvirus 1	10366	10365	1993-04-23 01:00:00	dsDNA viruses, no RNA stage				Viruses	Herpesviridae	Muromegalovirus		Herpesvirales	Betaherpesvirinae
	371782611	15995	Viruses	species	Murid herpesvirus 1	10366	10365	1993-04-23 01:00:00	dsDNA viruses, no RNA stage				Viruses	Herpesviridae	Muromegalovirus		Herpesvirales	Betaherpesvirinae
	371782776	15967	Viruses	species	Murid herpesvirus 1	10366	10365	1993-04-23 01:00:00	dsDNA viruses, no RNA stage				Viruses	Herpesviridae	Muromegalovirus		Herpesvirales	Betaherpesvirinae
	371782941	14322	Viruses	species	Murid herpesvirus 1	10366	10365	1993-04-23 01:00:00	dsDNA viruses, no RNA stage				Viruses	Herpesviridae	Muromegalovirus		Herpesvirales	Betaherpesvirinae
	371783105	16580	Viruses	species	Murid herpesvirus 1	10366	10365	1993-04-23 01:00:00	dsDNA viruses, no RNA stage				Viruses	Herpesviridae	Muromegalovirus		Herpesvirales	Betaherpesvirinae
	373231357	7680	Viruses	species	Gallid herpesvirus 1	10386	180255	1993-04-24 01:00:00	dsDNA viruses, no RNA stage				Viruses	Herpesviridae	Iltovirus		Herpesvirales	Alphaherpesvirinae
	373231358	7679	Viruses	species	Gallid herpesvirus 1	10386	180255	1993-04-24 01:00:00	dsDNA viruses, no RNA stage				Viruses	Herpesviridae	Iltovirus		Herpesvirales	Alphaherpesvirinae
	374675018	2832	Viruses	species	Gallid herpesvirus 2	10390	180252	1993-04-23 01:00:00	dsDNA viruses, no RNA stage				Viruses	Herpesviridae	Mardivirus		Herpesvirales	Alphaherpesvirinae
	378831686	5640	Viruses	species	Anatid herpesvirus 1	104388	180252	1998-02-23	dsDNA viruses, no RNA stage				Viruses	Herpesviridae	Mardivirus		Herpesvirales	Alphaherpesvirinae
	380259296	3398	Viruses	species	Gallid herpesvirus 1	10386	180255	1993-04-24 01:00:00	dsDNA viruses, no RNA stage				Viruses	Herpesviridae	Iltovirus		Herpesvirales	Alphaherpesvirinae
	380259376	7107	Viruses	species	Gallid herpesvirus 1	10386	180255	1993-04-24 01:00:00	dsDNA viruses, no RNA stage				Viruses	Herpesviridae	Iltovirus		Herpesvirales	Alphaherpesvirinae
	380259456	7469	Viruses	species	Gallid herpesvirus 1	10386	180255	1993-04-24 01:00:00	dsDNA viruses, no RNA stage				Viruses	Herpesviridae	Iltovirus		Herpesvirales	Alphaherpesvirinae
	380259536	7410	Viruses	species	Gallid herpesvirus 1	10386	180255	1993-04-24 01:00:00	dsDNA viruses, no RNA stage				Viruses	Herpesviridae	Iltovirus		Herpesvirales	Alphaherpesvirinae
	380776962	3025	Viruses	species	Human herpesvirus 1	10298	10294	1993-04-23 01:00:00	dsDNA viruses, no RNA stage				Viruses	Herpesviridae	Simplexvirus		Herpesvirales	Alphaherpesvirinae
	384597744	3880	Viruses	species	Human herpesvirus 1	10298	10294	1993-04-23 01:00:00	dsDNA viruses, no RNA stage				Viruses	Herpesviridae	Simplexvirus		Herpesvirales	Alphaherpesvirinae
	384929780	628	Viruses	species	Equid herpesvirus 8	39637	10319	1995-06-01 01:00:00	dsDNA viruses, no RNA stage				Viruses	Herpesviridae	Varicellovirus		Herpesvirales	Alphaherpesvirinae
	385663795	6333	Viruses	species	Suid herpesvirus 1	10345	10319	1993-04-23 01:00:00	dsDNA viruses, no RNA stage				Viruses	Herpesviridae	Varicellovirus		Herpesvirales	Alphaherpesvirinae
	385663865	6648	Viruses	species	Suid herpesvirus 1	10345	10319	1993-04-23 01:00:00	dsDNA viruses, no RNA stage				Viruses	Herpesviridae	Varicellovirus		Herpesvirales	Alphaherpesvirinae
	386522723	149332	Viruses	species	Equid herpesvirus 8	39637	10319	1995-06-01 01:00:00	dsDNA viruses, no RNA stage				Viruses	Herpesviridae	Varicellovirus		Herpesvirales	Alphaherpesvirinae
	389889355	9468	Viruses	species	Macacine herpesvirus 3	47929	10358	1996-07-11 01:00:00	dsDNA viruses, no RNA stage				Viruses	Herpesviridae	Cytomegalovirus		Herpesvirales	Betaherpesvirinae
	390987536	7651	Viruses	species	Gallid herpesvirus 1	10386	180255	1993-04-24 01:00:00	dsDNA viruses, no RNA stage				Viruses	Herpesviridae	Iltovirus		Herpesvirales	Alphaherpesvirinae
	390987616	7675	Viruses	species	Gallid herpesvirus 1	10386	180255	1993-04-24 01:00:00	dsDNA viruses, no RNA stage				Viruses	Herpesviridae	Iltovirus		Herpesvirales	Alphaherpesvirinae
	390987695	7469	Viruses	species	Gallid herpesvirus 1	10386	180255	1993-04-24 01:00:00	dsDNA viruses, no RNA stage				Viruses	Herpesviridae	Iltovirus		Herpesvirales	Alphaherpesvirinae
	390987774	7651	Viruses	species	Gallid herpesvirus 1	10386	180255	1993-04-24 01:00:00	dsDNA viruses, no RNA stage				Viruses	Herpesviridae	Iltovirus		Herpesvirales	Alphaherpesvirinae
	390987854	7735	Viruses	species	Gallid herpesvirus 1	10386	180255	1993-04-24 01:00:00	dsDNA viruses, no RNA stage				Viruses	Herpesviridae	Iltovirus		Herpesvirales	Alphaherpesvirinae
	390987934	7515	Viruses	species	Gallid herpesvirus 1	10386	180255	1993-04-24 01:00:00	dsDNA viruses, no RNA stage				Viruses	Herpesviridae	Iltovirus		Herpesvirales	Alphaherpesvirinae
	392497263	1915	Viruses	species	Gallid herpesvirus 2	10390	180252	1993-04-23 01:00:00	dsDNA viruses, no RNA stage				Viruses	Herpesviridae	Mardivirus		Herpesvirales	Alphaherpesvirinae
	392497452	2010	Viruses	species	Gallid herpesvirus 2	10390	180252	1993-04-23 01:00:00	dsDNA viruses, no RNA stage				Viruses	Herpesviridae	Mardivirus		Herpesvirales	Alphaherpesvirinae
	392497642	2274	Viruses	species	Gallid herpesvirus 2	10390	180252	1993-04-23 01:00:00	dsDNA viruses, no RNA stage				Viruses	Herpesviridae	Mardivirus		Herpesvirales	Alphaherpesvirinae
	392497830	2308	Viruses	species	Gallid herpesvirus 2	10390	180252	1993-04-23 01:00:00	dsDNA viruses, no RNA stage				Viruses	Herpesviridae	Mardivirus		Herpesvirales	Alphaherpesvirinae
	392498012	2422	Viruses	species	Gallid herpesvirus 2	10390	180252	1993-04-23 01:00:00	dsDNA viruses, no RNA stage				Viruses	Herpesviridae	Mardivirus		Herpesvirales	Alphaherpesvirinae
	392498192	3689	Viruses	species	Gallid herpesvirus 2	10390	180252	1993-04-23 01:00:00	dsDNA viruses, no RNA stage				Viruses	Herpesviridae	Mardivirus		Herpesvirales	Alphaherpesvirinae
	393008245	7510	Viruses	species	Gallid herpesvirus 1	10386	180255	1993-04-24 01:00:00	dsDNA viruses, no RNA stage				Viruses	Herpesviridae	Iltovirus		Herpesvirales	Alphaherpesvirinae
	393008325	7624	Viruses	species	Gallid herpesvirus 1	10386	180255	1993-04-24 01:00:00	dsDNA viruses, no RNA stage				Viruses	Herpesviridae	Iltovirus		Herpesvirales	Alphaherpesvirinae
	404314516	23050	Viruses	species	Human herpesvirus 5	10359	10358	1993-04-24 01:00:00	dsDNA viruses, no RNA stage				Viruses	Herpesviridae	Cytomegalovirus		Herpesvirales	Betaherpesvirinae
	404314683	18030	Viruses	species	Human herpesvirus 5	10359	10358	1993-04-24 01:00:00	dsDNA viruses, no RNA stage				Viruses	Herpesviridae	Cytomegalovirus		Herpesvirales	Betaherpesvirinae
	404314843	20407	Viruses	species	Human herpesvirus 5	10359	10358	1993-04-24 01:00:00	dsDNA viruses, no RNA stage				Viruses	Herpesviridae	Cytomegalovirus		Herpesvirales	Betaherpesvirinae
	404315013	22856	Viruses	species	Human herpesvirus 5	10359	10358	1993-04-24 01:00:00	dsDNA viruses, no RNA stage				Viruses	Herpesviridae	Cytomegalovirus		Herpesvirales	Betaherpesvirinae
	404315177	22559	Viruses	species	Human herpesvirus 5	10359	10358	1993-04-24 01:00:00	dsDNA viruses, no RNA stage				Viruses	Herpesviridae	Cytomegalovirus		Herpesvirales	Betaherpesvirinae
	404315347	23047	Viruses	species	Human herpesvirus 5	10359	10358	1993-04-24 01:00:00	dsDNA viruses, no RNA stage				Viruses	Herpesviridae	Cytomegalovirus		Herpesvirales	Betaherpesvirinae
	404315516	24949	Viruses	species	Human herpesvirus 5	10359	10358	1993-04-24 01:00:00	dsDNA viruses, no RNA stage				Viruses	Herpesviridae	Cytomegalovirus		Herpesvirales	Betaherpesvirinae
	404315683	24412	Viruses	species	Human herpesvirus 5	10359	10358	1993-04-24 01:00:00	dsDNA viruses, no RNA stage				Viruses	Herpesviridae	Cytomegalovirus		Herpesvirales	Betaherpesvirinae
	404315851	22201	Viruses	species	Human herpesvirus 5	10359	10358	1993-04-24 01:00:00	dsDNA viruses, no RNA stage				Viruses	Herpesviridae	Cytomegalovirus		Herpesvirales	Betaherpesvirinae
	404316020	27046	Viruses	species	Human herpesvirus 5	10359	10358	1993-04-24 01:00:00	dsDNA viruses, no RNA stage				Viruses	Herpesviridae	Cytomegalovirus		Herpesvirales	Betaherpesvirinae
	404316189	25916	Viruses	species	Human herpesvirus 5	10359	10358	1993-04-24 01:00:00	dsDNA viruses, no RNA stage				Viruses	Herpesviridae	Cytomegalovirus		Herpesvirales	Betaherpesvirinae
	404316357	24164	Viruses	species	Human herpesvirus 5	10359	10358	1993-04-24 01:00:00	dsDNA viruses, no RNA stage				Viruses	Herpesviridae	Cytomegalovirus		Herpesvirales	Betaherpesvirinae
	407355679	4076	Viruses	species	Human herpesvirus 8	37296	10379	1994-12-28	dsDNA viruses, no RNA stage				Viruses	Herpesviridae	Rhadinovirus		Herpesvirales	Gammaherpesvirinae
	410060837	7855	Viruses	no rank	Bovine herpesvirus type 1.1	79889	10320	1998-07-29 14:42:00	dsDNA viruses, no RNA stage				Viruses	Herpesviridae	Varicellovirus	Bovine herpesvirus 1	Herpesvirales	Alphaherpesvirinae
	410777373	1292	Viruses	species	Human herpesvirus 3	10335	10319	1993-04-23 01:00:00	dsDNA viruses, no RNA stage				Viruses	Herpesviridae	Varicellovirus		Herpesvirales	Alphaherpesvirinae
	422900440	534	Viruses	species	Murid herpesvirus 8	1261657	10365	2012-12-04 13:03:05	dsDNA viruses, no RNA stage				Viruses	Herpesviridae	Muromegalovirus		Herpesvirales	Betaherpesvirinae
	425707223	202946	Viruses	species	Murid herpesvirus 8	1261657	10365	2012-12-04 13:03:05	dsDNA viruses, no RNA stage				Viruses	Herpesviridae	Muromegalovirus		Herpesvirales	Betaherpesvirinae
	425856580	4403	Viruses	species	Gallid herpesvirus 2	10390	180252	1993-04-23 01:00:00	dsDNA viruses, no RNA stage				Viruses	Herpesviridae	Mardivirus		Herpesvirales	Alphaherpesvirinae
	428161017	14209	Viruses	species	Human herpesvirus 4	10376	10375	1993-04-23 01:00:00	dsDNA viruses, no RNA stage				Viruses	Herpesviridae	Lymphocryptovirus		Herpesvirales	Gammaherpesvirinae
	428161102	13760	Viruses	species	Human herpesvirus 4	10376	10375	1993-04-23 01:00:00	dsDNA viruses, no RNA stage				Viruses	Herpesviridae	Lymphocryptovirus		Herpesvirales	Gammaherpesvirinae
	429864619	5643	Viruses	species	Anatid herpesvirus 1	104388	180252	1998-02-23	dsDNA viruses, no RNA stage				Viruses	Herpesviridae	Mardivirus		Herpesvirales	Alphaherpesvirinae
	440658203	6061	Viruses	species	Gallid herpesvirus 1	10386	180255	1993-04-24 01:00:00	dsDNA viruses, no RNA stage				Viruses	Herpesviridae	Iltovirus		Herpesvirales	Alphaherpesvirinae
	440658283	7992	Viruses	species	Gallid herpesvirus 1	10386	180255	1993-04-24 01:00:00	dsDNA viruses, no RNA stage				Viruses	Herpesviridae	Iltovirus		Herpesvirales	Alphaherpesvirinae
	442564372	3740	Viruses	species	Equid herpesvirus 1	10326	10319	1993-04-23 01:00:00	dsDNA viruses, no RNA stage				Viruses	Herpesviridae	Varicellovirus		Herpesvirales	Alphaherpesvirinae
	443500624	785	Viruses	species	Human herpesvirus 3	10335	10319	1993-04-23 01:00:00	dsDNA viruses, no RNA stage				Viruses	Herpesviridae	Varicellovirus		Herpesvirales	Alphaherpesvirinae
	444437133	37036	Viruses	species	Elephantid herpesvirus 1	146015	548689	2000-12-22 18:01:00	dsDNA viruses, no RNA stage				Viruses	Herpesviridae	Proboscivirus		Herpesvirales	Betaherpesvirinae
	444437244	536	Viruses	species	Elephantid herpesvirus 1	146015	548689	2000-12-22 18:01:00	dsDNA viruses, no RNA stage				Viruses	Herpesviridae	Proboscivirus		Herpesvirales	Betaherpesvirinae
	444744797	1567	Viruses	species	Caviid herpesvirus 2	33706	686603	1994-03-13	dsDNA viruses, no RNA stage	unassigned Betaherpesvirinae			Viruses	Herpesviridae			Herpesvirales	Betaherpesvirinae
	448824857	233501	Viruses	species	Caviid herpesvirus 2	33706	686603	1994-03-13	dsDNA viruses, no RNA stage	unassigned Betaherpesvirinae			Viruses	Herpesviridae			Herpesvirales	Betaherpesvirinae
	452883368	20690	Viruses	no rank	Elephant endotheliotropic herpesvirus 1A	759753	146015	2010-05-04 18:00:40	dsDNA viruses, no RNA stage				Viruses	Herpesviridae	Proboscivirus	Elephantid herpesvirus 1	Herpesvirales	Betaherpesvirinae
	478735420	7703	Viruses	species	Human herpesvirus 6A	32603	40272	1994-05-02 01:00:00	dsDNA viruses, no RNA stage				Viruses	Herpesviridae	Roseolovirus		Herpesvirales	Betaherpesvirinae
	496991088	180421	Viruses	species	Elephantid herpesvirus 1	146015	548689	2000-12-22 18:01:00	dsDNA viruses, no RNA stage				Viruses	Herpesviridae	Proboscivirus		Herpesvirales	Betaherpesvirinae
	498541268	1115	Viruses	species	Human herpesvirus 3	10335	10319	1993-04-23 01:00:00	dsDNA viruses, no RNA stage				Viruses	Herpesviridae	Varicellovirus		Herpesvirales	Alphaherpesvirinae
	505494902	23109	Viruses	species	Human herpesvirus 5	10359	10358	1993-04-24 01:00:00	dsDNA viruses, no RNA stage				Viruses	Herpesviridae	Cytomegalovirus		Herpesvirales	Betaherpesvirinae
	510382245	7127	Viruses	species	Gallid herpesvirus 1	10386	180255	1993-04-24 01:00:00	dsDNA viruses, no RNA stage				Viruses	Herpesviridae	Iltovirus		Herpesvirales	Alphaherpesvirinae
	523510377	25955	Viruses	species	Human herpesvirus 5	10359	10358	1993-04-24 01:00:00	dsDNA viruses, no RNA stage				Viruses	Herpesviridae	Cytomegalovirus		Herpesvirales	Betaherpesvirinae
	529274767	1075	Viruses	species	Anatid herpesvirus 1	104388	180252	1998-02-23	dsDNA viruses, no RNA stage				Viruses	Herpesviridae	Mardivirus		Herpesvirales	Alphaherpesvirinae
	532597245	611	Viruses	species	Porcine cytomegalovirus	109993	342596	1999-12-11	dsDNA viruses, no RNA stage	unclassified Cytomegalovirus			Viruses	Herpesviridae	Cytomegalovirus		Herpesvirales	Betaherpesvirinae
	538447205	128367	Viruses	species	Porcine cytomegalovirus	109993	342596	1999-12-11	dsDNA viruses, no RNA stage	unclassified Cytomegalovirus			Viruses	Herpesviridae	Cytomegalovirus		Herpesvirales	Betaherpesvirinae
	544590821	1660	Viruses	species	Anatid herpesvirus 1	104388	180252	1998-02-23	dsDNA viruses, no RNA stage				Viruses	Herpesviridae	Mardivirus		Herpesvirales	Alphaherpesvirinae
	551484985	127320	Viruses	no rank	Retroperitoneal fibromatosis-associated herpesvirus	111469	37296	1999-12-27 11:05:00	dsDNA viruses, no RNA stage				Viruses	Herpesviridae	Rhadinovirus	Human herpesvirus 8	Herpesvirales	Gammaherpesvirinae
	554581631	4735	Viruses	species	Human herpesvirus 1	10298	10294	1993-04-23 01:00:00	dsDNA viruses, no RNA stage				Viruses	Herpesviridae	Simplexvirus		Herpesvirales	Alphaherpesvirinae
	557136928	25255	Viruses	no rank	Caviid herpesvirus 2 str. CIDMTR	1415526	33706	2013-11-07 07:01:36	dsDNA viruses, no RNA stage	unassigned Betaherpesvirinae			Viruses	Herpesviridae		Caviid herpesvirus 2	Herpesvirales	Betaherpesvirinae
	557368242	15759	Viruses	species	Human herpesvirus 4	10376	10375	1993-04-23 01:00:00	dsDNA viruses, no RNA stage				Viruses	Herpesviridae	Lymphocryptovirus		Herpesvirales	Gammaherpesvirinae
	559797941	23517	Viruses	species	Human herpesvirus 5	10359	10358	1993-04-24 01:00:00	dsDNA viruses, no RNA stage				Viruses	Herpesviridae	Cytomegalovirus		Herpesvirales	Betaherpesvirinae
	559798111	20550	Viruses	species	Human herpesvirus 5	10359	10358	1993-04-24 01:00:00	dsDNA viruses, no RNA stage				Viruses	Herpesviridae	Cytomegalovirus		Herpesvirales	Betaherpesvirinae
	559798280	26495	Viruses	species	Human herpesvirus 5	10359	10358	1993-04-24 01:00:00	dsDNA viruses, no RNA stage				Viruses	Herpesviridae	Cytomegalovirus		Herpesvirales	Betaherpesvirinae
	559798448	24398	Viruses	species	Human herpesvirus 5	10359	10358	1993-04-24 01:00:00	dsDNA viruses, no RNA stage				Viruses	Herpesviridae	Cytomegalovirus		Herpesvirales	Betaherpesvirinae
	559798614	22839	Viruses	species	Human herpesvirus 5	10359	10358	1993-04-24 01:00:00	dsDNA viruses, no RNA stage				Viruses	Herpesviridae	Cytomegalovirus		Herpesvirales	Betaherpesvirinae
	574959962	4426	Viruses	species	Human herpesvirus 2	10310	10294	1993-04-23 01:00:00	dsDNA viruses, no RNA stage				Viruses	Herpesviridae	Simplexvirus		Herpesvirales	Alphaherpesvirinae
	2276414	356	Viruses	species	Lymphocystis disease virus 1	36363	10494	1995-04-01	dsDNA viruses, no RNA stage				Viruses	Iridoviridae	Lymphocystivirus
	9695413	102653	Viruses	species	Lymphocystis disease virus 1	36363	10494	1995-04-01	dsDNA viruses, no RNA stage				Viruses	Iridoviridae	Lymphocystivirus
	18656492	14869	Viruses	no rank	Tiger frog virus	160691	10493	2001-06-06 19:00:00	dsDNA viruses, no RNA stage				Viruses	Iridoviridae	Ranavirus	Frog virus 3
	19773610	469	Viruses	species	Infectious spleen and kidney necrosis virus	180170	308906	2002-02-04 18:01:00	dsDNA viruses, no RNA stage				Viruses	Iridoviridae	Megalocytivirus
	19881405	111362	Viruses	species	Infectious spleen and kidney necrosis virus	180170	308906	2002-02-04 18:01:00	dsDNA viruses, no RNA stage				Viruses	Iridoviridae	Megalocytivirus
	37722432	1377	Viruses	no rank	Ambystoma tigrinum stebbensi virus	217733	265294	2003-11-11 18:01:30	dsDNA viruses, no RNA stage				Viruses	Iridoviridae	Ranavirus	Ambystoma tigrinum virus
	42517349	1518	Viruses	species	Singapore grouper iridovirus	262968	327987	2004-10-16 18:04:08	dsDNA viruses, no RNA stage	unclassified Ranavirus			Viruses	Iridoviridae	Ranavirus
	44829126	33097	Viruses	species	Lymphocystis disease virus - isolate China	256729	345690	2004-06-16 18:02:57	dsDNA viruses, no RNA stage	unclassified Lymphocystivirus			Viruses	Iridoviridae	Lymphocystivirus
	45686008	106332	Viruses	species	Ambystoma tigrinum virus	265294	10492	2005-01-08 18:02:57	dsDNA viruses, no RNA stage				Viruses	Iridoviridae	Ranavirus
	47060115	885	Viruses	species	Frog virus 3	10493	10492	1993-08-02 01:00:00	dsDNA viruses, no RNA stage				Viruses	Iridoviridae	Ranavirus
	48843719	186250	Viruses	species	Lymphocystis disease virus - isolate China	256729	345690	2004-06-16 18:02:57	dsDNA viruses, no RNA stage	unclassified Lymphocystivirus			Viruses	Iridoviridae	Lymphocystivirus
	49237297	105903	Viruses	species	Frog virus 3	10493	10492	1993-08-02 01:00:00	dsDNA viruses, no RNA stage				Viruses	Iridoviridae	Ranavirus
	50237482	48578	Viruses	no rank	Rock bream iridovirus	263891	180170	2004-03-08 18:04:01	dsDNA viruses, no RNA stage				Viruses	Iridoviridae	Megalocytivirus	Infectious spleen and kidney necrosis virus
	56418213	11724	Viruses	no rank	Grouper iridovirus	127569	262968	2000-06-16 01:00:00	dsDNA viruses, no RNA stage	unclassified Ranavirus			Viruses	Iridoviridae	Ranavirus	Singapore grouper iridovirus
	56692637	140131	Viruses	species	Singapore grouper iridovirus	262968	327987	2004-10-16 18:04:08	dsDNA viruses, no RNA stage	unclassified Ranavirus			Viruses	Iridoviridae	Ranavirus
	62421189	49382	Viruses	no rank	Orange-spotted grouper iridovirus	322017	180170	2005-06-25 18:01:41	dsDNA viruses, no RNA stage				Viruses	Iridoviridae	Megalocytivirus	Infectious spleen and kidney necrosis virus
	113200500	38845	Viruses	no rank	Large yellow croaker iridovirus	216928	180170	2003-01-03 18:01:00	dsDNA viruses, no RNA stage				Viruses	Iridoviridae	Megalocytivirus	Infectious spleen and kidney necrosis virus
	194307489	5827	Viruses	no rank	Soft-shelled turtle iridovirus	365144	10493	2006-12-31 18:00:22	dsDNA viruses, no RNA stage				Viruses	Iridoviridae	Ranavirus	Frog virus 3
	375281729	12236	Viruses	no rank	Common midwife toad ranavirus	540070	10493	2008-06-14 18:00:21	dsDNA viruses, no RNA stage				Viruses	Iridoviridae	Ranavirus	Frog virus 3
	383215167	5862	Viruses	no rank	Rana grylio iridovirus	380178	10493	2006-04-11 18:00:21	dsDNA viruses, no RNA stage				Viruses	Iridoviridae	Ranavirus	Frog virus 3
	387119422	3225	Viruses	species	European catfish virus	84739	10492	1998-12-01	dsDNA viruses, no RNA stage				Viruses	Iridoviridae	Ranavirus
	388260063	127732	Viruses	species	European catfish virus	84739	10492	1998-12-01	dsDNA viruses, no RNA stage				Viruses	Iridoviridae	Ranavirus
	456496280	48432	Viruses	no rank	Rock bream iridovirus	263891	180170	2004-03-08 18:04:01	dsDNA viruses, no RNA stage				Viruses	Iridoviridae	Megalocytivirus	Infectious spleen and kidney necrosis virus
	541134645	13321	Viruses	no rank	Andrias davidianus ranavirus	1398177	10493	2013-09-16 01:01:34	dsDNA viruses, no RNA stage				Viruses	Iridoviridae	Ranavirus	Frog virus 3
	536721239	578	Viruses	species	Ostreid herpesvirus 1	261939	548686	2004-02-03 18:02:20	dsDNA viruses, no RNA stage				Viruses	Malacoherpesviridae	Ostreavirus		Herpesvirales
	537108089	207439	Viruses	species	Ostreid herpesvirus 1	261939	548686	2004-02-03 18:02:20	dsDNA viruses, no RNA stage				Viruses	Malacoherpesviridae	Ostreavirus		Herpesvirales
	60295	7880	Viruses	no rank	Human papillomavirus type 13	10573	333754	1993-08-02 01:00:00	dsDNA viruses, no RNA stage				Viruses	Papillomaviridae	Alphapapillomavirus	Alphapapillomavirus 10
	60862	7265	Viruses	no rank	Bovine papillomavirus type 4	10562	10561	1993-04-29 01:00:00	dsDNA viruses, no RNA stage				Viruses	Papillomaviridae	Xipapillomavirus	Xipapillomavirus 1
	60882	7230	Viruses	no rank	Human papillomavirus type 57	333753	337043	1993-04-21 01:00:00	dsDNA viruses, no RNA stage				Viruses	Papillomaviridae	Alphapapillomavirus	Alphapapillomavirus 4
	61010	7902	Viruses	no rank	Pygmy chimpanzee papillomavirus type 1	10576	333754	1993-04-21 01:00:00	dsDNA viruses, no RNA stage				Viruses	Papillomaviridae	Alphapapillomavirus	Alphapapillomavirus 10
	222386	7824	Viruses	no rank	Human papillomavirus type 58	10598	337041	1996-03-01	dsDNA viruses, no RNA stage				Viruses	Papillomaviridae	Alphapapillomavirus	Alphapapillomavirus 9
	222395	453	Viruses	no rank	Human papillomavirus type 5b	10599	337051	1993-04-29 01:00:00	dsDNA viruses, no RNA stage				Viruses	Papillomaviridae	Betapapillomavirus	Betapapillomavirus 1
	312100	7113	Viruses	no rank	Human papillomavirus type 65	28312	333926	1993-07-27 01:00:00	dsDNA viruses, no RNA stage				Viruses	Papillomaviridae	Gammapapillomavirus	Gammapapillomavirus 1
	332996	6032	Viruses	no rank	Bovine papillomavirus type 2	10560	337052	1993-08-02 01:00:00	dsDNA viruses, no RNA stage				Viruses	Papillomaviridae	Deltapapillomavirus	Deltapapillomavirus 4
	333026	7510	Viruses	no rank	Human papillomavirus type 11	10580	333754	1994-09-28 01:00:00	dsDNA viruses, no RNA stage				Viruses	Papillomaviridae	Alphapapillomavirus	Alphapapillomavirus 10
	333048	7912	Viruses	no rank	Human papillomavirus type 31	10585	337041	1993-08-02 01:00:00	dsDNA viruses, no RNA stage				Viruses	Papillomaviridae	Alphapapillomavirus	Alphapapillomavirus 9
	333049	7909	Viruses	no rank	Human papillomavirus type 33	10586	337041	1993-08-02 01:00:00	dsDNA viruses, no RNA stage				Viruses	Papillomaviridae	Alphapapillomavirus	Alphapapillomavirus 9
	333050	7851	Viruses	no rank	Human papillomavirus type 35	10587	337041	1993-08-02 01:00:00	dsDNA viruses, no RNA stage				Viruses	Papillomaviridae	Alphapapillomavirus	Alphapapillomavirus 9
	333062	7537	Viruses	no rank	Human papillomavirus type 47	10594	337051	1993-08-02 01:00:00	dsDNA viruses, no RNA stage				Viruses	Papillomaviridae	Betapapillomavirus	Betapapillomavirus 1
	333074	7617	Viruses	no rank	Human papillomavirus type 8	10579	337051	1993-08-02 01:00:00	dsDNA viruses, no RNA stage				Viruses	Papillomaviridae	Betapapillomavirus	Betapapillomavirus 1
	333087	7808	Viruses	no rank	Human papillomavirus type 51	10595	337044	1996-03-01	dsDNA viruses, no RNA stage				Viruses	Papillomaviridae	Alphapapillomavirus	Alphapapillomavirus 5
	333211	7788	Viruses	no rank	Human papillomavirus type 42	10590	337048	1993-08-03 01:00:00	dsDNA viruses, no RNA stage				Viruses	Papillomaviridae	Alphapapillomavirus	Alphapapillomavirus 1
	333245	7833	Viruses	no rank	Human papillomavirus type 39	10588	337042	1993-08-03 01:00:00	dsDNA viruses, no RNA stage				Viruses	Papillomaviridae	Alphapapillomavirus	Alphapapillomavirus 7
	396910	7656	Viruses	no rank	Human papillomavirus type 12	10604	337051	1993-08-02 01:00:00	dsDNA viruses, no RNA stage				Viruses	Papillomaviridae	Betapapillomavirus	Betapapillomavirus 1
	396918	7439	Viruses	no rank	Human papillomavirus type 14D	31546	10605	1993-09-03 01:00:00	dsDNA viruses, no RNA stage	Human papillomavirus type 14			Viruses	Papillomaviridae	Betapapillomavirus	Betapapillomavirus 1
	396924	7412	Viruses	no rank	Human papillomavirus type 15	10606	333924	1993-08-02 01:00:00	dsDNA viruses, no RNA stage				Viruses	Papillomaviridae	Betapapillomavirus	Betapapillomavirus 2
	396932	7427	Viruses	no rank	Human papillomavirus type 17	10607	333924	1993-08-02 01:00:00	dsDNA viruses, no RNA stage				Viruses	Papillomaviridae	Betapapillomavirus	Betapapillomavirus 2
	396940	7674	Viruses	no rank	Human papillomavirus type 19	10608	337051	1993-08-02 01:00:00	dsDNA viruses, no RNA stage				Viruses	Papillomaviridae	Betapapillomavirus	Betapapillomavirus 1
	396948	7713	Viruses	no rank	Human papillomavirus type 25	10609	337051	1993-08-02 01:00:00	dsDNA viruses, no RNA stage				Viruses	Papillomaviridae	Betapapillomavirus	Betapapillomavirus 1
	396964	5688	Viruses	no rank	Human papillomavirus type 27	333752	337043	1997-11-06	dsDNA viruses, no RNA stage				Viruses	Papillomaviridae	Alphapapillomavirus	Alphapapillomavirus 4
	396973	7660	Viruses	no rank	Human papillomavirus type 30	10611	337050	1993-08-02 01:00:00	dsDNA viruses, no RNA stage				Viruses	Papillomaviridae	Alphapapillomavirus	Alphapapillomavirus 6
	396997	7879	Viruses	no rank	Human papillomavirus type 35H	31551	10587	1993-09-03 01:00:00	dsDNA viruses, no RNA stage	Human papillomavirus type 35			Viruses	Papillomaviridae	Alphapapillomavirus	Alphapapillomavirus 9
	397005	7654	Viruses	no rank	Human papillomavirus type 3	10614	337039	1993-08-02 01:00:00	dsDNA viruses, no RNA stage				Viruses	Papillomaviridae	Alphapapillomavirus	Alphapapillomavirus 2
	397014	7385	Viruses	no rank	Human papillomavirus type 40	10615	333757	1993-08-02 01:00:00	dsDNA viruses, no RNA stage				Viruses	Papillomaviridae	Alphapapillomavirus	Alphapapillomavirus 8
	397022	7795	Viruses	no rank	Human papillomavirus type 45	10593	337042	1993-08-02 01:00:00	dsDNA viruses, no RNA stage				Viruses	Papillomaviridae	Alphapapillomavirus	Alphapapillomavirus 7
	397038	7942	Viruses	no rank	Human papillomavirus type 52	10618	337041	1993-08-02 01:00:00	dsDNA viruses, no RNA stage				Viruses	Papillomaviridae	Alphapapillomavirus	Alphapapillomavirus 9
	397053	7844	Viruses	no rank	Human papillomavirus type 56	10596	337050	1993-08-02 01:00:00	dsDNA viruses, no RNA stage				Viruses	Papillomaviridae	Alphapapillomavirus	Alphapapillomavirus 6
	458704	102	Viruses	no rank	Human papillomavirus type 1a	10583	334203	1994-05-24 01:00:00	dsDNA viruses, no RNA stage				Viruses	Papillomaviridae	Mupapillomavirus	Mupapillomavirus 1
	492936	7909	Viruses	no rank	Human papillomavirus type 33	10586	337041	1993-08-02 01:00:00	dsDNA viruses, no RNA stage				Viruses	Papillomaviridae	Alphapapillomavirus	Alphapapillomavirus 9
	557236	7896	Viruses	no rank	Human papillomavirus type 59	37115	337042	1994-11-28	dsDNA viruses, no RNA stage				Viruses	Papillomaviridae	Alphapapillomavirus	Alphapapillomavirus 7
	940299	560	Viruses	no rank	Human papillomavirus type 6a	37122	333754	1994-10-08 01:00:00	dsDNA viruses, no RNA stage				Viruses	Papillomaviridae	Alphapapillomavirus	Alphapapillomavirus 10
	1020162	7757	Viruses	no rank	Human papillomavirus type 20	31547	337051	1995-01-14	dsDNA viruses, no RNA stage				Viruses	Papillomaviridae	Betapapillomavirus	Betapapillomavirus 1
	1020170	7779	Viruses	no rank	Human papillomavirus type 21	31548	337051	1995-01-14	dsDNA viruses, no RNA stage				Viruses	Papillomaviridae	Betapapillomavirus	Betapapillomavirus 1
	1020178	7368	Viruses	no rank	Human papillomavirus type 22	37954	333924	1995-01-14	dsDNA viruses, no RNA stage				Viruses	Papillomaviridae	Betapapillomavirus	Betapapillomavirus 2
	1020186	7324	Viruses	no rank	Human papillomavirus type 23	37955	333924	1995-01-14	dsDNA viruses, no RNA stage				Viruses	Papillomaviridae	Betapapillomavirus	Betapapillomavirus 2
	1020194	7452	Viruses	no rank	Human papillomavirus type 24	37956	337051	1995-01-14	dsDNA viruses, no RNA stage				Viruses	Papillomaviridae	Betapapillomavirus	Betapapillomavirus 1
	1020202	7679	Viruses	no rank	Human papillomavirus type 28	37111	337039	1994-11-28	dsDNA viruses, no RNA stage				Viruses	Papillomaviridae	Alphapapillomavirus	Alphapapillomavirus 2
	1020210	7916	Viruses	no rank	Human papillomavirus type 29	37112	337039	1994-11-28	dsDNA viruses, no RNA stage				Viruses	Papillomaviridae	Alphapapillomavirus	Alphapapillomavirus 2
	1020218	7452	Viruses	no rank	Human papillomavirus type 36	37957	337051	1995-01-14	dsDNA viruses, no RNA stage				Viruses	Papillomaviridae	Betapapillomavirus	Betapapillomavirus 1
	1020226	7421	Viruses	no rank	Human papillomavirus type 37	37958	333924	1995-01-14	dsDNA viruses, no RNA stage				Viruses	Papillomaviridae	Betapapillomavirus	Betapapillomavirus 2
	1020234	7400	Viruses	no rank	Human papillomavirus type 38	37959	333924	1995-01-14	dsDNA viruses, no RNA stage				Viruses	Papillomaviridae	Betapapillomavirus	Betapapillomavirus 2
	1020242	7833	Viruses	no rank	Human papillomavirus type 44	10592	333754	1993-08-04 01:00:00	dsDNA viruses, no RNA stage				Viruses	Papillomaviridae	Alphapapillomavirus	Alphapapillomavirus 10
	1020266	7822	Viruses	no rank	Human papillomavirus type 55	37114	333754	1994-11-28	dsDNA viruses, no RNA stage				Viruses	Papillomaviridae	Alphapapillomavirus	Alphapapillomavirus 10
	1020290	7824	Viruses	no rank	Human papillomavirus type 66	37119	337050	1994-11-28	dsDNA viruses, no RNA stage				Viruses	Papillomaviridae	Alphapapillomavirus	Alphapapillomavirus 6
	1173493	7905	Viruses	no rank	Human papillomavirus type 70	39457	337042	1995-04-05 18:32:00	dsDNA viruses, no RNA stage				Viruses	Papillomaviridae	Alphapapillomavirus	Alphapapillomavirus 7
	1249624	7788	Viruses	no rank	Human papillomavirus type 42	10590	337048	1993-08-03 01:00:00	dsDNA viruses, no RNA stage				Viruses	Papillomaviridae	Alphapapillomavirus	Alphapapillomavirus 1
	1491683	7904	Viruses	no rank	Human papillomavirus type 72	333770	333767	1996-08-15 17:46:00	dsDNA viruses, no RNA stage				Viruses	Papillomaviridae	Alphapapillomavirus	Alphapapillomavirus 3
	1491692	7268	Viruses	no rank	Human papillomavirus type 73	51033	337049	1996-08-15 17:47:00	dsDNA viruses, no RNA stage				Viruses	Papillomaviridae	Alphapapillomavirus	Alphapapillomavirus 11
	1813787	6688	Viruses	no rank	Ovine papillomavirus type 2	56145	56144	1997-02-02	dsDNA viruses, no RNA stage				Viruses	Papillomaviridae	Deltapapillomavirus	Deltapapillomavirus 3
	1845202	7267	Viruses	no rank	Human papillomavirus type 57b	186160	333753	2002-02-07 18:01:00	dsDNA viruses, no RNA stage	Human papillomavirus type 57			Viruses	Papillomaviridae	Alphapapillomavirus	Alphapapillomavirus 4
	2218078	7707	Viruses	no rank	Human papillomavirus RTRX7	79691	337051	1998-07-27 18:53:00	dsDNA viruses, no RNA stage				Viruses	Papillomaviridae	Betapapillomavirus	Betapapillomavirus 1
	2454637	7889	Viruses	no rank	Common chimpanzee papillomavirus 1	66261	333754	1997-10-01 01:00:00	dsDNA viruses, no RNA stage				Viruses	Papillomaviridae	Alphapapillomavirus	Alphapapillomavirus 10
	2911544	7527	Viruses	no rank	Human papillomavirus type 75	69984	334207	1998-02-27	dsDNA viruses, no RNA stage				Viruses	Papillomaviridae	Betapapillomavirus	Betapapillomavirus 3
	2911551	7521	Viruses	no rank	Human papillomavirus type 76	69985	334207	1998-02-27	dsDNA viruses, no RNA stage				Viruses	Papillomaviridae	Betapapillomavirus	Betapapillomavirus 3
	2911558	7887	Viruses	no rank	Human papillomavirus type 77	69986	337039	1998-02-27	dsDNA viruses, no RNA stage				Viruses	Papillomaviridae	Alphapapillomavirus	Alphapapillomavirus 2
	2911565	7427	Viruses	no rank	Human papillomavirus type 80	69987	333924	1998-02-27	dsDNA viruses, no RNA stage				Viruses	Papillomaviridae	Betapapillomavirus	Betapapillomavirus 2
	3228267	7801	Viruses	no rank	Human papillomavirus type 67	37120	337041	1994-11-28	dsDNA viruses, no RNA stage				Viruses	Papillomaviridae	Alphapapillomavirus	Alphapapillomavirus 9
	4574720	7812	Viruses	no rank	Human papillomavirus - cand85	151757	337042	2001-02-09 18:01:00	dsDNA viruses, no RNA stage				Viruses	Papillomaviridae	Alphapapillomavirus	Alphapapillomavirus 7
	5059324	8104	Viruses	no rank	Human papillomavirus type 83	333772	333767	1999-06-15 01:00:00	dsDNA viruses, no RNA stage				Viruses	Papillomaviridae	Alphapapillomavirus	Alphapapillomavirus 3
	6002612	524	Viruses	no rank	Human papillomavirus type 6	31552	333754	1993-08-13 01:00:00	dsDNA viruses, no RNA stage				Viruses	Papillomaviridae	Alphapapillomavirus	Alphapapillomavirus 10
	6970418	7497	Viruses	no rank	Human papillomavirus type 69	37121	337044	1994-11-28	dsDNA viruses, no RNA stage				Viruses	Papillomaviridae	Alphapapillomavirus	Alphapapillomavirus 5
	6970427	7871	Viruses	no rank	Human papillomavirus type 82	129724	337044	2000-06-19 17:24:00	dsDNA viruses, no RNA stage				Viruses	Papillomaviridae	Alphapapillomavirus	Alphapapillomavirus 5
	8919565	792	Viruses	species	Kappapapillomavirus 2	10623	325457	1993-08-03 01:00:00	dsDNA viruses, no RNA stage				Viruses	Papillomaviridae	Kappapapillomavirus
	8919744	100	Viruses	species	Kappapapillomavirus 2	10623	325457	1993-08-03 01:00:00	dsDNA viruses, no RNA stage				Viruses	Papillomaviridae	Kappapapillomavirus
	9626032	7860	Viruses	species	Alphapapillomavirus 4	337043	333750	2005-08-28 18:01:31	dsDNA viruses, no RNA stage				Viruses	Papillomaviridae	Alphapapillomavirus
	9626041	7614	Viruses	no rank	Human papillomavirus type 41	10589	334205	1993-04-21 01:00:00	dsDNA viruses, no RNA stage				Viruses	Papillomaviridae	Nupapillomavirus	Nupapillomavirus 1
	9626053	7902	Viruses	no rank	Human papillomavirus type 6b	10600	333754	1996-05-23 01:00:00	dsDNA viruses, no RNA stage				Viruses	Papillomaviridae	Alphapapillomavirus	Alphapapillomavirus 10
	9626063	7815	Viruses	species	Mupapillomavirus 1	334203	334202	2005-06-25 18:01:41	dsDNA viruses, no RNA stage				Viruses	Papillomaviridae	Mupapillomavirus
	9626069	7857	Viruses	species	Alphapapillomavirus 7	337042	333750	2005-08-28 18:01:31	dsDNA viruses, no RNA stage				Viruses	Papillomaviridae	Alphapapillomavirus
	9626597	7353	Viruses	no rank	Human papillomavirus type 4	10617	333926	1993-08-02 01:00:00	dsDNA viruses, no RNA stage				Viruses	Papillomaviridae	Gammapapillomavirus	Gammapapillomavirus 1
	9626605	7348	Viruses	no rank	Human papillomavirus type 63	28311	334204	1993-07-27 01:00:00	dsDNA viruses, no RNA stage				Viruses	Papillomaviridae	Mupapillomavirus	Mupapillomavirus 2
	9627056	7945	Viruses	species	Deltapapillomavirus 4	337052	325454	2005-08-28 18:01:31	dsDNA viruses, no RNA stage				Viruses	Papillomaviridae	Deltapapillomavirus
	9627065	8374	Viruses	species	Deltapapillomavirus 2	10564	325454	1993-08-02 01:00:00	dsDNA viruses, no RNA stage				Viruses	Papillomaviridae	Deltapapillomavirus
	9627074	8095	Viruses	species	Deltapapillomavirus 1	10565	325454	1993-08-02 01:00:00	dsDNA viruses, no RNA stage				Viruses	Papillomaviridae	Deltapapillomavirus
	9627145	7746	Viruses	no rank	Human papillomavirus type 5	333923	337051	1993-08-02 01:00:00	dsDNA viruses, no RNA stage				Viruses	Papillomaviridae	Betapapillomavirus	Betapapillomavirus 1
	9627196	7868	Viruses	species	Kappapapillomavirus 2	10623	325457	1993-08-03 01:00:00	dsDNA viruses, no RNA stage				Viruses	Papillomaviridae	Kappapapillomavirus
	9627257	7919	Viruses	no rank	Human papillomavirus type 10	333759	337039	1993-08-02 01:00:00	dsDNA viruses, no RNA stage				Viruses	Papillomaviridae	Alphapapillomavirus	Alphapapillomavirus 2
	9627305	7855	Viruses	no rank	Human papillomavirus type 26	333762	337044	1993-09-03 01:00:00	dsDNA viruses, no RNA stage				Viruses	Papillomaviridae	Alphapapillomavirus	Alphapapillomavirus 5
	9627327	7961	Viruses	no rank	Human papillomavirus type 32	333763	337048	1993-08-02 01:00:00	dsDNA viruses, no RNA stage				Viruses	Papillomaviridae	Alphapapillomavirus	Alphapapillomavirus 1
	9627334	7723	Viruses	no rank	Human papillomavirus type 34	333764	337049	1993-08-02 01:00:00	dsDNA viruses, no RNA stage				Viruses	Papillomaviridae	Alphapapillomavirus	Alphapapillomavirus 11
	9627363	7560	Viruses	no rank	Human papillomavirus type 49	10616	334207	1993-08-02 01:00:00	dsDNA viruses, no RNA stage				Viruses	Papillomaviridae	Betapapillomavirus	Betapapillomavirus 3
	9627377	7856	Viruses	no rank	Human papillomavirus type 53	333765	337050	1993-08-02 01:00:00	dsDNA viruses, no RNA stage				Viruses	Papillomaviridae	Alphapapillomavirus	Alphapapillomavirus 6
	9627389	8027	Viruses	no rank	Human papillomavirus type 7	10620	333757	1993-08-02 01:00:00	dsDNA viruses, no RNA stage				Viruses	Papillomaviridae	Alphapapillomavirus	Alphapapillomavirus 8
	9627396	7434	Viruses	no rank	Human papillomavirus type 9	10621	333924	1993-08-02 01:00:00	dsDNA viruses, no RNA stage				Viruses	Papillomaviridae	Betapapillomavirus	Betapapillomavirus 2
	9627486	7687	Viruses	species	Iotapapillomavirus 1	10567	325456	1993-12-26	dsDNA viruses, no RNA stage				Viruses	Papillomaviridae	Iotapapillomavirus
	9627734	8607	Viruses	species	Lambdapapillomavirus 2	35258	325462	1994-06-04 01:00:00	dsDNA viruses, no RNA stage				Viruses	Papillomaviridae	Lambdapapillomavirus
	9628437	7759	Viruses	species	Alphapapillomavirus 13	333766	333750	1994-11-28	dsDNA viruses, no RNA stage				Viruses	Papillomaviridae	Alphapapillomavirus
	9628445	8028	Viruses	species	Alphapapillomavirus 12	10570	333750	1993-08-03 01:00:00	dsDNA viruses, no RNA stage				Viruses	Papillomaviridae	Alphapapillomavirus
	9628542	7100	Viruses	no rank	Human papillomavirus type 48	40538	333928	1995-10-18 01:00:00	dsDNA viruses, no RNA stage				Viruses	Papillomaviridae	Gammapapillomavirus	Gammapapillomavirus 2
	9628550	7184	Viruses	no rank	Human papillomavirus type 50	40539	333929	1995-10-18 01:00:00	dsDNA viruses, no RNA stage				Viruses	Papillomaviridae	Gammapapillomavirus	Gammapapillomavirus 3
	9628566	7313	Viruses	no rank	Human papillomavirus type 60	40540	333930	1995-10-18 01:00:00	dsDNA viruses, no RNA stage				Viruses	Papillomaviridae	Gammapapillomavirus	Gammapapillomavirus 4
	9628574	7989	Viruses	species	Alphapapillomavirus 3	333767	333750	2005-06-25 18:01:41	dsDNA viruses, no RNA stage				Viruses	Papillomaviridae	Alphapapillomavirus
	9629249	7761	Viruses	species	Deltapapillomavirus 3	56144	325454	1997-02-02	dsDNA viruses, no RNA stage				Viruses	Papillomaviridae	Deltapapillomavirus
	9635132	7565	Viruses	species	Kappapapillomavirus 1	122291	325457	2000-05-03 01:00:00	dsDNA viruses, no RNA stage				Viruses	Papillomaviridae	Kappapapillomavirus
	12060351	7997	Viruses	no rank	Human papillomavirus type 71	120686	931244	2001-01-16 12:26:00	dsDNA viruses, no RNA stage				Viruses	Papillomaviridae	Alphapapillomavirus	Alphapapillomavirus 14
	12958167	7948	Viruses	no rank	Human papillomavirus type 84	150546	333767	2001-02-22 18:00:00	dsDNA viruses, no RNA stage				Viruses	Papillomaviridae	Alphapapillomavirus	Alphapapillomavirus 3
	13507120	7904	Viruses	no rank	Human papillomavirus type 82	129724	337044	2000-06-19 17:24:00	dsDNA viruses, no RNA stage				Viruses	Papillomaviridae	Alphapapillomavirus	Alphapapillomavirus 5
	14475578	7998	Viruses	no rank	Human papillomavirus type 87	120381	333767	2000-12-07 18:01:00	dsDNA viruses, no RNA stage				Viruses	Papillomaviridae	Alphapapillomavirus	Alphapapillomavirus 3
	15741127	7983	Viruses	no rank	Human papillomavirus type 86	171370	333767	2001-09-26 19:01:00	dsDNA viruses, no RNA stage				Viruses	Papillomaviridae	Alphapapillomavirus	Alphapapillomavirus 3
	18138516	7879	Viruses	species	Omikronpapillomavirus 1	82676	325461	2000-05-27 01:00:00	dsDNA viruses, no RNA stage				Viruses	Papillomaviridae	Omikronpapillomavirus
	20428628	7610	Viruses	no rank	Equus caballus papillomavirus 1	333920	333919	2002-05-01 19:01:00	dsDNA viruses, no RNA stage				Viruses	Papillomaviridae	Zetapapillomavirus	Zetapapillomavirus 1
	21039033	182	Viruses	species	Lambdapapillomavirus 1	181667	325462	2002-03-09 18:01:00	dsDNA viruses, no RNA stage				Viruses	Papillomaviridae	Lambdapapillomavirus
	21326229	7304	Viruses	species	Thetapapillomavirus 1	197772	334213	2002-06-04 19:01:00	dsDNA viruses, no RNA stage				Viruses	Papillomaviridae	Thetapapillomavirus
	21844535	7729	Viruses	species	Etapapillomavirus 1	197771	325458	2002-07-12 19:01:00	dsDNA viruses, no RNA stage				Viruses	Papillomaviridae	Etapapillomavirus
	22023568	7966	Viruses	no rank	Human papillomavirus type 91	202252	333757	2002-08-01 19:01:00	dsDNA viruses, no RNA stage				Viruses	Papillomaviridae	Alphapapillomavirus	Alphapapillomavirus 8
	22095322	8078	Viruses	no rank	Human papillomavirus type 89	202250	333767	2002-08-06 19:00:00	dsDNA viruses, no RNA stage				Viruses	Papillomaviridae	Alphapapillomavirus	Alphapapillomavirus 3
	22138122	8033	Viruses	no rank	Human papillomavirus type 90	333769	931244	2002-08-08 15:43:00	dsDNA viruses, no RNA stage				Viruses	Papillomaviridae	Alphapapillomavirus	Alphapapillomavirus 14
	22901192	117	Viruses	species	Zetapapillomavirus 1	333919	333918	2002-09-18 18:59:00	dsDNA viruses, no RNA stage				Viruses	Papillomaviridae	Zetapapillomavirus
	22901245	8090	Viruses	no rank	Reindeer papillomavirus	10569	10565	1993-08-03 01:00:00	dsDNA viruses, no RNA stage				Viruses	Papillomaviridae	Deltapapillomavirus	Deltapapillomavirus 1
	23216976	7276	Viruses	species	Xipapillomavirus 1	10561	333921	1995-07-13 01:00:00	dsDNA viruses, no RNA stage				Viruses	Papillomaviridae	Xipapillomavirus
	23217014	7841	Viruses	species	Epsilonpapillomavirus 1	40537	325459	1995-07-13 01:00:00	dsDNA viruses, no RNA stage				Viruses	Papillomaviridae	Epsilonpapillomavirus
	27462475	1654	Viruses	species	Alphapapillomavirus 13	333766	333750	1994-11-28	dsDNA viruses, no RNA stage				Viruses	Papillomaviridae	Alphapapillomavirus
	27462483	7887	Viruses	no rank	Human papillomavirus type 74	44028	333754	1996-08-16 01:00:00	dsDNA viruses, no RNA stage				Viruses	Papillomaviridae	Alphapapillomavirus	Alphapapillomavirus 10
	27463075	163	Viruses	no rank	Human papillomavirus type 16	333760	337041	1993-08-02 01:00:00	dsDNA viruses, no RNA stage				Viruses	Papillomaviridae	Alphapapillomavirus	Alphapapillomavirus 9
	27463084	148	Viruses	no rank	Human papillomavirus type 16	333760	337041	1993-08-02 01:00:00	dsDNA viruses, no RNA stage				Viruses	Papillomaviridae	Alphapapillomavirus	Alphapapillomavirus 9
	27531786	7461	Viruses	no rank	Human papillomavirus type 92	211787	334208	2003-01-04 18:01:00	dsDNA viruses, no RNA stage				Viruses	Papillomaviridae	Betapapillomavirus	Betapapillomavirus 4
	29468132	174	Viruses	no rank	Human papillomavirus type 16	333760	337041	1993-08-02 01:00:00	dsDNA viruses, no RNA stage				Viruses	Papillomaviridae	Alphapapillomavirus	Alphapapillomavirus 9
	30315794	8300	Viruses	no rank	Felis domesticus papillomavirus type 1	188524	181667	2002-03-09 18:01:00	dsDNA viruses, no RNA stage				Viruses	Papillomaviridae	Lambdapapillomavirus	Lambdapapillomavirus 1
	33330945	135	Viruses	no rank	Human papillomavirus type 16	333760	337041	1993-08-02 01:00:00	dsDNA viruses, no RNA stage				Viruses	Papillomaviridae	Alphapapillomavirus	Alphapapillomavirus 9
	37089393	7450	Viruses	no rank	Human papillomavirus type 93	247268	337051	2003-10-08 18:03:03	dsDNA viruses, no RNA stage				Viruses	Papillomaviridae	Betapapillomavirus	Betapapillomavirus 1
	37622177	8014	Viruses	no rank	Human papillomavirus type 71	120686	931244	2001-01-16 12:26:00	dsDNA viruses, no RNA stage				Viruses	Papillomaviridae	Alphapapillomavirus	Alphapapillomavirus 14
	37622185	8007	Viruses	no rank	Human papillomavirus type 71	120686	931244	2001-01-16 12:26:00	dsDNA viruses, no RNA stage				Viruses	Papillomaviridae	Alphapapillomavirus	Alphapapillomavirus 14
	37622193	8010	Viruses	no rank	Human papillomavirus type 71	120686	931244	2001-01-16 12:26:00	dsDNA viruses, no RNA stage				Viruses	Papillomaviridae	Alphapapillomavirus	Alphapapillomavirus 14
	37622201	8015	Viruses	no rank	Human papillomavirus type 71	120686	931244	2001-01-16 12:26:00	dsDNA viruses, no RNA stage				Viruses	Papillomaviridae	Alphapapillomavirus	Alphapapillomavirus 14
	39932599	8092	Viruses	no rank	Human papillomavirus type 62	334210	333767	1994-11-28	dsDNA viruses, no RNA stage				Viruses	Papillomaviridae	Alphapapillomavirus	Alphapapillomavirus 3
	40804474	7975	Viruses	no rank	Human papillomavirus type 43	10591	333757	1993-08-04 01:00:00	dsDNA viruses, no RNA stage				Viruses	Papillomaviridae	Alphapapillomavirus	Alphapapillomavirus 8
	40804485	182	Viruses	species	Epsilonpapillomavirus 1	40537	325459	1995-07-13 01:00:00	dsDNA viruses, no RNA stage				Viruses	Papillomaviridae	Epsilonpapillomavirus
	40804492	178	Viruses	species	Xipapillomavirus 1	10561	333921	1995-07-13 01:00:00	dsDNA viruses, no RNA stage				Viruses	Papillomaviridae	Xipapillomavirus
	40804501	7296	Viruses	no rank	Bovine papillomavirus type 6	10563	10561	1995-07-13 01:00:00	dsDNA viruses, no RNA stage				Viruses	Papillomaviridae	Xipapillomavirus	Xipapillomavirus 1
	40804509	8070	Viruses	no rank	Human papillomavirus type 81	333771	333767	2004-01-14 18:03:24	dsDNA viruses, no RNA stage				Viruses	Papillomaviridae	Alphapapillomavirus	Alphapapillomavirus 3
	40804520	7331	Viruses	no rank	Human papillomavirus type 95	260716	333926	2004-01-14 18:03:25	dsDNA viruses, no RNA stage				Viruses	Papillomaviridae	Gammapapillomavirus	Gammapapillomavirus 1
	40804528	6367	Viruses	no rank	Human papillomavirus type 94	260717	337039	2004-01-14 18:03:25	dsDNA viruses, no RNA stage				Viruses	Papillomaviridae	Alphapapillomavirus	Alphapapillomavirus 2
	50253426	7438	Viruses	no rank	Human papillomavirus type 96	247269	334209	2003-10-08 18:03:03	dsDNA viruses, no RNA stage				Viruses	Papillomaviridae	Betapapillomavirus	Betapapillomavirus 5
	56462978	200	Viruses	no rank	Human papillomavirus type 16	333760	337041	1993-08-02 01:00:00	dsDNA viruses, no RNA stage				Viruses	Papillomaviridae	Alphapapillomavirus	Alphapapillomavirus 9
	56463005	177	Viruses	no rank	Human papillomavirus type 16	333760	337041	1993-08-02 01:00:00	dsDNA viruses, no RNA stage				Viruses	Papillomaviridae	Alphapapillomavirus	Alphapapillomavirus 9
	56693036	8101	Viruses	no rank	Canis familiaris papillomavirus 2	292792	1176148	2004-09-21 18:04:02	dsDNA viruses, no RNA stage				Viruses	Papillomaviridae	Taupapillomavirus	Taupapillomavirus 1
	56698748	7722	Viruses	no rank	Trichechus manatus papillomavirus 1	291589	1176146	2004-11-08 18:05:15	dsDNA viruses, no RNA stage				Viruses	Papillomaviridae	Rhopapillomavirus	Rhopapillomavirus 1
	58430757	6238	Viruses	no rank	Human papillomavirus type 94	260717	337039	2004-01-14 18:03:25	dsDNA viruses, no RNA stage				Viruses	Papillomaviridae	Alphapapillomavirus	Alphapapillomavirus 2
	62362146	7428	Viruses	no rank	Erethizon dorsatum papillomavirus 1	291590	1176147	2005-01-11 18:03:56	dsDNA viruses, no RNA stage				Viruses	Papillomaviridae	Sigmapapillomavirus	Sigmapapillomavirus 1
	62547897	8233	Viruses	no rank	Lynx rufus papillomavirus type 1	323364	181667	2006-03-01 18:00:20	dsDNA viruses, no RNA stage				Viruses	Papillomaviridae	Lambdapapillomavirus	Lambdapapillomavirus 1
	62547905	8321	Viruses	no rank	Puma concolor papillomavirus type 1	323365	181667	2006-03-01 18:00:20	dsDNA viruses, no RNA stage				Viruses	Papillomaviridae	Lambdapapillomavirus	Lambdapapillomavirus 1
	62547913	8103	Viruses	no rank	Panthera leo persica papillomavirus type 1	323366	181667	2006-03-01 18:00:20	dsDNA viruses, no RNA stage				Viruses	Papillomaviridae	Lambdapapillomavirus	Lambdapapillomavirus 1
	68304288	8170	Viruses	no rank	Procyon lotor papillomavirus 1	312349	1175855	2005-06-21 18:04:49	dsDNA viruses, no RNA stage				Viruses	Papillomaviridae	Lambdapapillomavirus	Lambdapapillomavirus 4
	71061109	5413	Viruses	no rank	Human papillomavirus type 27b	325568	333752	2005-08-28 18:01:31	dsDNA viruses, no RNA stage	Human papillomavirus type 27			Viruses	Papillomaviridae	Alphapapillomavirus	Alphapapillomavirus 4
	71726685	7822	Viruses	no rank	Human papillomavirus type 68a	338322	45240	2005-12-07 18:00:14	dsDNA viruses, no RNA stage	Human papillomavirus type 68			Viruses	Papillomaviridae	Alphapapillomavirus	Alphapapillomavirus 7
	71726694	7671	Viruses	no rank	Human papillomavirus type 97	338324	337042	2006-05-31 18:00:23	dsDNA viruses, no RNA stage				Viruses	Papillomaviridae	Alphapapillomavirus	Alphapapillomavirus 7
	71726710	7776	Viruses	no rank	Human papillomavirus type 106	338326	931244	2005-12-07 18:00:14	dsDNA viruses, no RNA stage				Viruses	Papillomaviridae	Alphapapillomavirus	Alphapapillomavirus 14
	71726718	8078	Viruses	no rank	Human papillomavirus type 102	338327	333767	2005-12-07 18:00:14	dsDNA viruses, no RNA stage				Viruses	Papillomaviridae	Alphapapillomavirus	Alphapapillomavirus 3
	74484000	7400	Viruses	no rank	Human papillomavirus type 38b	334514	37959	2005-07-04 18:01:56	dsDNA viruses, no RNA stage	Human papillomavirus type 38			Viruses	Papillomaviridae	Betapapillomavirus	Betapapillomavirus 2
	77157775	8078	Viruses	no rank	Uncia uncia papillomavirus type 1	348686	181667	2007-04-19 18:01:18	dsDNA viruses, no RNA stage				Viruses	Papillomaviridae	Lambdapapillomavirus	Lambdapapillomavirus 1
	82547780	7412	Viruses	no rank	Bos taurus papillomavirus 7	1001533	1513255	2011-03-26 18:00:33	dsDNA viruses, no RNA stage				Viruses	Papillomaviridae	Dyoxipapillomavirus	Dyoxipapillomavirus 1
	82621093	7393	Viruses	no rank	Micromys minutus papillomavirus 1	10568	1176145	1993-08-03 01:00:00	dsDNA viruses, no RNA stage				Viruses	Papillomaviridae	Pipapillomavirus	Pipapillomavirus 2
	85827580	7880	Viruses	no rank	Human papillomavirus type 13	10573	333754	1993-08-02 01:00:00	dsDNA viruses, no RNA stage				Viruses	Papillomaviridae	Alphapapillomavirus	Alphapapillomavirus 10
	89034256	7791	Viruses	no rank	Bovine papillomavirus 8	374077	40537	2007-07-07 18:00:55	dsDNA viruses, no RNA stage				Viruses	Papillomaviridae	Epsilonpapillomavirus	Epsilonpapillomavirus 1
	89034263	7773	Viruses	no rank	Bovine papillomavirus type 8-EB	374078	374077	2007-07-07 18:00:55	dsDNA viruses, no RNA stage	Bovine papillomavirus 8			Viruses	Papillomaviridae	Epsilonpapillomavirus	Epsilonpapillomavirus 1
	97331426	7542	Viruses	no rank	Capra hircus papillomavirus 1	338903	1177757	2006-05-13 18:00:20	dsDNA viruses, no RNA stage				Viruses	Papillomaviridae	Phipapillomavirus	Phipapillomavirus 1
	109390374	7866	Viruses	no rank	Tursiops truncatus papillomavirus 2	936060	1176149	2006-03-01 18:00:20	dsDNA viruses, no RNA stage				Viruses	Papillomaviridae	Upsilonpapillomavirus	Upsilonpapillomavirus 2
	109390382	7263	Viruses	no rank	Human papillomavirus type 103	338323	1175848	2006-05-31 18:00:23	dsDNA viruses, no RNA stage				Viruses	Papillomaviridae	Gammapapillomavirus	Gammapapillomavirus 6
	109390389	7259	Viruses	no rank	Human papillomavirus type 101	915425	1175848	2006-05-31 18:00:23	dsDNA viruses, no RNA stage				Viruses	Papillomaviridae	Gammapapillomavirus	Gammapapillomavirus 6
	113200740	7801	Viruses	no rank	Canine papillomavirus 3	360397	1177758	2006-08-01 18:00:26	dsDNA viruses, no RNA stage				Viruses	Papillomaviridae	Chipapillomavirus	Chipapillomavirus 1
	113200763	7970	Viruses	no rank	Rousettus aegyptiacus papillomavirus 1	369584	1177762	2006-08-03 18:00:21	dsDNA viruses, no RNA stage				Viruses	Papillomaviridae	Psipapillomavirus	Psipapillomavirus 1
	116536728	7522	Viruses	no rank	Mastomys coucha papillomavirus 2	392505	334212	2006-10-01 18:00:21	dsDNA viruses, no RNA stage				Viruses	Papillomaviridae	Pipapillomavirus	Pipapillomavirus 1
	118129780	7393	Viruses	no rank	Micromys minutus papillomavirus 1	10568	1176145	1993-08-03 01:00:00	dsDNA viruses, no RNA stage				Viruses	Papillomaviridae	Pipapillomavirus	Pipapillomavirus 2
	122891970	7588	Viruses	no rank	Macaca fascicularis papillomavirus type 1	419544	337051	2007-02-01 18:00:23	dsDNA viruses, no RNA stage				Viruses	Papillomaviridae	Betapapillomavirus	Betapapillomavirus 1
	126131393	7562	Viruses	no rank	Human papillomavirus type 107	427343	333924	2007-02-28 18:00:25	dsDNA viruses, no RNA stage				Viruses	Papillomaviridae	Betapapillomavirus	Betapapillomavirus 2
	126738383	7671	Viruses	no rank	Human papillomavirus type 97	338324	337042	2006-05-31 18:00:23	dsDNA viruses, no RNA stage				Viruses	Papillomaviridae	Alphapapillomavirus	Alphapapillomavirus 7
	138374731	7866	Viruses	no rank	Human papillomavirus type 56	10596	337050	1993-08-02 01:00:00	dsDNA viruses, no RNA stage				Viruses	Papillomaviridae	Alphapapillomavirus	Alphapapillomavirus 6
	138374746	7866	Viruses	no rank	Human papillomavirus type 56	10596	337050	1993-08-02 01:00:00	dsDNA viruses, no RNA stage				Viruses	Papillomaviridae	Alphapapillomavirus	Alphapapillomavirus 6
	138374760	7790	Viruses	no rank	Human papillomavirus type 56	10596	337050	1993-08-02 01:00:00	dsDNA viruses, no RNA stage				Viruses	Papillomaviridae	Alphapapillomavirus	Alphapapillomavirus 6
	138374778	7790	Viruses	no rank	Human papillomavirus type 56	10596	337050	1993-08-02 01:00:00	dsDNA viruses, no RNA stage				Viruses	Papillomaviridae	Alphapapillomavirus	Alphapapillomavirus 6
	138374801	7845	Viruses	no rank	Human papillomavirus type 56	10596	337050	1993-08-02 01:00:00	dsDNA viruses, no RNA stage				Viruses	Papillomaviridae	Alphapapillomavirus	Alphapapillomavirus 6
	138374823	7845	Viruses	no rank	Human papillomavirus type 56	10596	337050	1993-08-02 01:00:00	dsDNA viruses, no RNA stage				Viruses	Papillomaviridae	Alphapapillomavirus	Alphapapillomavirus 6
	138374843	7818	Viruses	no rank	Human papillomavirus type 66	37119	337050	1994-11-28	dsDNA viruses, no RNA stage				Viruses	Papillomaviridae	Alphapapillomavirus	Alphapapillomavirus 6
	138374869	7816	Viruses	no rank	Human papillomavirus type 66	37119	337050	1994-11-28	dsDNA viruses, no RNA stage				Viruses	Papillomaviridae	Alphapapillomavirus	Alphapapillomavirus 6
	138374884	7816	Viruses	no rank	Human papillomavirus type 66	37119	337050	1994-11-28	dsDNA viruses, no RNA stage				Viruses	Papillomaviridae	Alphapapillomavirus	Alphapapillomavirus 6
	138374911	7824	Viruses	no rank	Human papillomavirus type 66	37119	337050	1994-11-28	dsDNA viruses, no RNA stage				Viruses	Papillomaviridae	Alphapapillomavirus	Alphapapillomavirus 6
	138374933	7824	Viruses	no rank	Human papillomavirus type 66	37119	337050	1994-11-28	dsDNA viruses, no RNA stage				Viruses	Papillomaviridae	Alphapapillomavirus	Alphapapillomavirus 6
	138374954	7816	Viruses	no rank	Human papillomavirus type 66	37119	337050	1994-11-28	dsDNA viruses, no RNA stage				Viruses	Papillomaviridae	Alphapapillomavirus	Alphapapillomavirus 6
	138374972	7816	Viruses	no rank	Human papillomavirus type 66	37119	337050	1994-11-28	dsDNA viruses, no RNA stage				Viruses	Papillomaviridae	Alphapapillomavirus	Alphapapillomavirus 6
	138374994	7816	Viruses	no rank	Human papillomavirus type 66	37119	337050	1994-11-28	dsDNA viruses, no RNA stage				Viruses	Papillomaviridae	Alphapapillomavirus	Alphapapillomavirus 6
	138375013	7816	Viruses	no rank	Human papillomavirus type 66	37119	337050	1994-11-28	dsDNA viruses, no RNA stage				Viruses	Papillomaviridae	Alphapapillomavirus	Alphapapillomavirus 6
	138375030	7816	Viruses	no rank	Human papillomavirus type 66	37119	337050	1994-11-28	dsDNA viruses, no RNA stage				Viruses	Papillomaviridae	Alphapapillomavirus	Alphapapillomavirus 6
	145968235	120	Viruses	no rank	Human papillomavirus type 18	333761	337042	1993-08-02 01:00:00	dsDNA viruses, no RNA stage				Viruses	Papillomaviridae	Alphapapillomavirus	Alphapapillomavirus 7
	145968244	118	Viruses	no rank	Human papillomavirus type 18	333761	337042	1993-08-02 01:00:00	dsDNA viruses, no RNA stage				Viruses	Papillomaviridae	Alphapapillomavirus	Alphapapillomavirus 7
	145968253	120	Viruses	no rank	Human papillomavirus type 18	333761	337042	1993-08-02 01:00:00	dsDNA viruses, no RNA stage				Viruses	Papillomaviridae	Alphapapillomavirus	Alphapapillomavirus 7
	145968262	118	Viruses	no rank	Human papillomavirus type 18	333761	337042	1993-08-02 01:00:00	dsDNA viruses, no RNA stage				Viruses	Papillomaviridae	Alphapapillomavirus	Alphapapillomavirus 7
	145968271	7792	Viruses	no rank	Human papillomavirus type 45	10593	337042	1993-08-02 01:00:00	dsDNA viruses, no RNA stage				Viruses	Papillomaviridae	Alphapapillomavirus	Alphapapillomavirus 7
	145968280	7788	Viruses	no rank	Human papillomavirus type 45	10593	337042	1993-08-02 01:00:00	dsDNA viruses, no RNA stage				Viruses	Papillomaviridae	Alphapapillomavirus	Alphapapillomavirus 7
	145968289	7788	Viruses	no rank	Human papillomavirus type 45	10593	337042	1993-08-02 01:00:00	dsDNA viruses, no RNA stage				Viruses	Papillomaviridae	Alphapapillomavirus	Alphapapillomavirus 7
	145968298	7788	Viruses	no rank	Human papillomavirus type 45	10593	337042	1993-08-02 01:00:00	dsDNA viruses, no RNA stage				Viruses	Papillomaviridae	Alphapapillomavirus	Alphapapillomavirus 7
	145968307	7788	Viruses	no rank	Human papillomavirus type 45	10593	337042	1993-08-02 01:00:00	dsDNA viruses, no RNA stage				Viruses	Papillomaviridae	Alphapapillomavirus	Alphapapillomavirus 7
	145968316	7764	Viruses	no rank	Human papillomavirus type 45	10593	337042	1993-08-02 01:00:00	dsDNA viruses, no RNA stage				Viruses	Papillomaviridae	Alphapapillomavirus	Alphapapillomavirus 7
	145968325	7764	Viruses	no rank	Human papillomavirus type 45	10593	337042	1993-08-02 01:00:00	dsDNA viruses, no RNA stage				Viruses	Papillomaviridae	Alphapapillomavirus	Alphapapillomavirus 7
	145968334	7753	Viruses	no rank	Human papillomavirus type 45	10593	337042	1993-08-02 01:00:00	dsDNA viruses, no RNA stage				Viruses	Papillomaviridae	Alphapapillomavirus	Alphapapillomavirus 7
	145968343	7764	Viruses	no rank	Human papillomavirus type 45	10593	337042	1993-08-02 01:00:00	dsDNA viruses, no RNA stage				Viruses	Papillomaviridae	Alphapapillomavirus	Alphapapillomavirus 7
	145968352	7790	Viruses	no rank	Human papillomavirus type 45	10593	337042	1993-08-02 01:00:00	dsDNA viruses, no RNA stage				Viruses	Papillomaviridae	Alphapapillomavirus	Alphapapillomavirus 7
	145968361	7764	Viruses	no rank	Human papillomavirus type 45	10593	337042	1993-08-02 01:00:00	dsDNA viruses, no RNA stage				Viruses	Papillomaviridae	Alphapapillomavirus	Alphapapillomavirus 7
	145968370	7764	Viruses	no rank	Human papillomavirus type 45	10593	337042	1993-08-02 01:00:00	dsDNA viruses, no RNA stage				Viruses	Papillomaviridae	Alphapapillomavirus	Alphapapillomavirus 7
	145968379	7671	Viruses	no rank	Human papillomavirus type 97	338324	337042	2006-05-31 18:00:23	dsDNA viruses, no RNA stage				Viruses	Papillomaviridae	Alphapapillomavirus	Alphapapillomavirus 7
	156151685	110	Viruses	no rank	Human papillomavirus type 53	333765	337050	1993-08-02 01:00:00	dsDNA viruses, no RNA stage				Viruses	Papillomaviridae	Alphapapillomavirus	Alphapapillomavirus 6
	156633497	7957	Viruses	no rank	Macaca fascicularis papillomavirus type 3b	464936	10570	2008-07-30 18:00:21	dsDNA viruses, no RNA stage				Viruses	Papillomaviridae	Alphapapillomavirus	Alphapapillomavirus 12
	157678963	7096	Viruses	no rank	Human papillomavirus type 57c	471358	333753	2007-09-27 18:00:33	dsDNA viruses, no RNA stage	Human papillomavirus type 57			Viruses	Papillomaviridae	Alphapapillomavirus	Alphapapillomavirus 4
	161019484	8063	Viruses	no rank	Macaca fascicularis papillomavirus type 7	471185	10570	2008-07-30 18:00:21	dsDNA viruses, no RNA stage				Viruses	Papillomaviridae	Alphapapillomavirus	Alphapapillomavirus 12
	161019504	7943	Viruses	no rank	Macaca fascicularis papillomavirus type 6	471184	10570	2008-07-30 18:00:21	dsDNA viruses, no RNA stage				Viruses	Papillomaviridae	Alphapapillomavirus	Alphapapillomavirus 12
	161019514	7950	Viruses	no rank	Macaca fascicularis papillomavirus type 4	471182	10570	2008-07-30 18:00:21	dsDNA viruses, no RNA stage				Viruses	Papillomaviridae	Alphapapillomavirus	Alphapapillomavirus 12
	161019524	8001	Viruses	no rank	Macaca fascicularis papillomavirus type 8	471186	10570	2008-07-30 18:00:21	dsDNA viruses, no RNA stage				Viruses	Papillomaviridae	Alphapapillomavirus	Alphapapillomavirus 12
	161019534	7990	Viruses	no rank	Macaca fascicularis papillomavirus type 5	471183	10570	2008-07-30 18:00:21	dsDNA viruses, no RNA stage				Viruses	Papillomaviridae	Alphapapillomavirus	Alphapapillomavirus 12
	161622648	7295	Viruses	species	Bandicoot papillomatosis carcinomatosis virus type 1	479058	333938	2007-11-30 18:00:29	dsDNA viruses, no RNA stage	unclassified Papillomaviridae	non-primate mammal papillomaviruses		Viruses	Papillomaviridae
	163914074	7303	Viruses	no rank	Bovine papillomavirus type 9	453460	10561	2007-12-22 18:00:33	dsDNA viruses, no RNA stage				Viruses	Papillomaviridae	Xipapillomavirus	Xipapillomavirus 1
	163914081	7399	Viruses	no rank	Bovine papillomavirus type 10	453461	10561	2007-12-22 18:00:33	dsDNA viruses, no RNA stage				Viruses	Papillomaviridae	Xipapillomavirus	Xipapillomavirus 1
	164429763	7742	Viruses	no rank	Canine papillomavirus 4	464980	1177759	2007-12-31 18:00:28	dsDNA viruses, no RNA stage				Viruses	Papillomaviridae	Chipapillomavirus	Chipapillomavirus 2
	165909225	7915	Viruses	no rank	Tursiops truncatus papillomavirus type 3	496865	936059	2008-07-30 18:00:21	dsDNA viruses, no RNA stage	Tursiops truncatus papillomavirus 1			Viruses	Papillomaviridae	Upsilonpapillomavirus	Upsilonpapillomavirus 1
	167600365	7326	Viruses	no rank	Human papillomavirus type 88	337054	333931	2007-11-16 18:00:32	dsDNA viruses, no RNA stage				Viruses	Papillomaviridae	Gammapapillomavirus	Gammapapillomavirus 5
	169641576	7271	Viruses	no rank	Bovine papillomavirus BAA5-Japan	508418	453461	2008-03-11 18:00:30	dsDNA viruses, no RNA stage	Bovine papillomavirus type 10			Viruses	Papillomaviridae	Xipapillomavirus	Xipapillomavirus 1
	186461186	7401	Viruses	no rank	Human papillomavirus FA75/KI88-03	563190	518628	2008-09-25 18:00:33	dsDNA viruses, no RNA stage	Human papillomavirus type 104			Viruses	Papillomaviridae	Betapapillomavirus	Betapapillomavirus 2
	186461194	7423	Viruses	no rank	Human papillomavirus type 110	518629	333924	2008-07-30 18:00:21	dsDNA viruses, no RNA stage				Viruses	Papillomaviridae	Betapapillomavirus	Betapapillomavirus 2
	186461202	7178	Viruses	no rank	Human papillomavirus type 111	518630	333924	2008-07-30 18:00:21	dsDNA viruses, no RNA stage				Viruses	Papillomaviridae	Betapapillomavirus	Betapapillomavirus 2
	186972294	7988	Viruses	no rank	Macaca fascicularis papillomavirus type 9	524652	10570	2008-07-30 18:00:21	dsDNA viruses, no RNA stage				Viruses	Papillomaviridae	Alphapapillomavirus	Alphapapillomavirus 12
	187941626	6953	Viruses	no rank	Chelonia mydas papillomavirus 1	485242	485241	2007-12-03 18:00:28	dsDNA viruses, no RNA stage	Caretta caretta papillomavirus 1			Viruses	Papillomaviridae	Dyozetapapillomavirus	Dyozetapapillomavirus 1
	189043078	7582	Viruses	no rank	Ursus maritimus papillomavirus 1	461322	1177763	2008-04-26 18:01:00	dsDNA viruses, no RNA stage				Viruses	Papillomaviridae	Omegapapillomavirus	Omegapapillomavirus 1
	189475225	7277	Viruses	species	Bandicoot papillomatosis carcinomatosis virus type 2	500654	333938	2008-06-03 18:00:21	dsDNA viruses, no RNA stage	unclassified Papillomaviridae	non-primate mammal papillomaviruses		Viruses	Papillomaviridae
	194268064	8032	Viruses	no rank	Capreolus capreolus papillomavirus 1	470214	1175853	2008-07-01 18:00:20	dsDNA viruses, no RNA stage				Viruses	Papillomaviridae	Deltapapillomavirus	Deltapapillomavirus 5
	195661184	8089	Viruses	no rank	Tursiops truncatus papillomavirus 1	936059	1176150	2008-07-30 18:00:21	dsDNA viruses, no RNA stage				Viruses	Papillomaviridae	Upsilonpapillomavirus	Upsilonpapillomavirus 1
	196170262	169	Viruses	no rank	Human papillomavirus type 16	333760	337041	1993-08-02 01:00:00	dsDNA viruses, no RNA stage				Viruses	Papillomaviridae	Alphapapillomavirus	Alphapapillomavirus 9
	206599537	7260	Viruses	no rank	Sus scrofa papillomavirus 1	446138	1177764	2008-07-30 18:00:21	dsDNA viruses, no RNA stage				Viruses	Papillomaviridae	Dyodeltapapillomavirus	Dyodeltapapillomavirus 1
	211939961	7824	Viruses	no rank	Human papillomavirus type 58	10598	337041	1996-03-01	dsDNA viruses, no RNA stage				Viruses	Papillomaviridae	Alphapapillomavirus	Alphapapillomavirus 9
	211939970	7824	Viruses	no rank	Human papillomavirus type 58	10598	337041	1996-03-01	dsDNA viruses, no RNA stage				Viruses	Papillomaviridae	Alphapapillomavirus	Alphapapillomavirus 9
	211939979	7824	Viruses	no rank	Human papillomavirus type 58	10598	337041	1996-03-01	dsDNA viruses, no RNA stage				Viruses	Papillomaviridae	Alphapapillomavirus	Alphapapillomavirus 9
	211939988	7824	Viruses	no rank	Human papillomavirus type 58	10598	337041	1996-03-01	dsDNA viruses, no RNA stage				Viruses	Papillomaviridae	Alphapapillomavirus	Alphapapillomavirus 9
	211939997	7824	Viruses	no rank	Human papillomavirus type 58	10598	337041	1996-03-01	dsDNA viruses, no RNA stage				Viruses	Papillomaviridae	Alphapapillomavirus	Alphapapillomavirus 9
	211940006	7825	Viruses	no rank	Human papillomavirus type 58	10598	337041	1996-03-01	dsDNA viruses, no RNA stage				Viruses	Papillomaviridae	Alphapapillomavirus	Alphapapillomavirus 9
	211940015	7836	Viruses	no rank	Human papillomavirus type 58	10598	337041	1996-03-01	dsDNA viruses, no RNA stage				Viruses	Papillomaviridae	Alphapapillomavirus	Alphapapillomavirus 9
	211940024	7824	Viruses	no rank	Human papillomavirus type 58	10598	337041	1996-03-01	dsDNA viruses, no RNA stage				Viruses	Papillomaviridae	Alphapapillomavirus	Alphapapillomavirus 9
	212286048	7020	Viruses	no rank	Caretta caretta papillomavirus 1	485241	1177766	2007-12-03 18:00:28	dsDNA viruses, no RNA stage				Viruses	Papillomaviridae	Dyozetapapillomavirus	Dyozetapapillomavirus 1
	218685637	8256	Viruses	no rank	Erinaceus europaeus papillomavirus 1	445217	1177767	2008-01-31 18:00:29	dsDNA viruses, no RNA stage				Viruses	Papillomaviridae	Dyoetapapillomavirus	Dyoetapapillomavirus 1
	218931413	7824	Viruses	no rank	Human papillomavirus type 58	10598	337041	1996-03-01	dsDNA viruses, no RNA stage				Viruses	Papillomaviridae	Alphapapillomavirus	Alphapapillomavirus 9
	218931422	7833	Viruses	no rank	Human papillomavirus type 33	10586	337041	1993-08-02 01:00:00	dsDNA viruses, no RNA stage				Viruses	Papillomaviridae	Alphapapillomavirus	Alphapapillomavirus 9
	218931431	7897	Viruses	no rank	Human papillomavirus type 59	37115	337042	1994-11-28	dsDNA viruses, no RNA stage				Viruses	Papillomaviridae	Alphapapillomavirus	Alphapapillomavirus 7
	218931440	7510	Viruses	no rank	Human papillomavirus type 11	10580	333754	1994-09-28 01:00:00	dsDNA viruses, no RNA stage				Viruses	Papillomaviridae	Alphapapillomavirus	Alphapapillomavirus 10
	218931450	7834	Viruses	no rank	Human papillomavirus type 68	45240	337042	1996-02-18	dsDNA viruses, no RNA stage				Viruses	Papillomaviridae	Alphapapillomavirus	Alphapapillomavirus 7
	218953352	1241	Viruses	no rank	Rhesus papillomavirus type 1b	464935	10570	2008-07-30 18:00:21	dsDNA viruses, no RNA stage				Viruses	Papillomaviridae	Alphapapillomavirus	Alphapapillomavirus 12
	218953354	7912	Viruses	no rank	Macaca fascicularis papillomavirus type 10	524653	10570	2008-07-30 18:00:21	dsDNA viruses, no RNA stage				Viruses	Papillomaviridae	Alphapapillomavirus	Alphapapillomavirus 12
	224460777	7802	Viruses	species	Equine papillomavirus 2	526413	1233178	2008-07-30 18:00:21	dsDNA viruses, no RNA stage	unclassified Dyoiotapapillomavirus			Viruses	Papillomaviridae	Dyoiotapapillomavirus
	224762743	7149	Viruses	no rank	Human papillomavirus type 108	565537	1175848	2009-03-10 18:00:34	dsDNA viruses, no RNA stage				Viruses	Papillomaviridae	Gammapapillomavirus	Gammapapillomavirus 6
	224983322	7149	Viruses	no rank	Human papillomavirus type 108	565537	1175848	2009-03-10 18:00:34	dsDNA viruses, no RNA stage				Viruses	Papillomaviridae	Gammapapillomavirus	Gammapapillomavirus 6
	225927560	7346	Viruses	no rank	Human papillomavirus type 109	915426	1175849	2008-07-30 18:00:21	dsDNA viruses, no RNA stage				Viruses	Papillomaviridae	Gammapapillomavirus	Gammapapillomavirus 7
	225927568	7227	Viruses	no rank	Human papillomavirus type 112	915427	1175850	2008-07-30 18:00:21	dsDNA viruses, no RNA stage				Viruses	Papillomaviridae	Gammapapillomavirus	Gammapapillomavirus 8
	238623435	7559	Viruses	no rank	Human papillomavirus type 99	587348	337051	2009-05-29 18:00:34	dsDNA viruses, no RNA stage				Viruses	Papillomaviridae	Betapapillomavirus	Betapapillomavirus 1
	238623442	7380	Viruses	no rank	Human papillomavirus type 100	587349	333924	2009-05-29 18:00:34	dsDNA viruses, no RNA stage				Viruses	Papillomaviridae	Betapapillomavirus	Betapapillomavirus 2
	238623450	7386	Viruses	no rank	Human papillomavirus type 104	518628	333924	2009-05-29 18:00:34	dsDNA viruses, no RNA stage				Viruses	Papillomaviridae	Betapapillomavirus	Betapapillomavirus 2
	238623458	7657	Viruses	no rank	Human papillomavirus type 105	587350	337051	2009-05-29 18:00:34	dsDNA viruses, no RNA stage				Viruses	Papillomaviridae	Betapapillomavirus	Betapapillomavirus 1
	238623465	7164	Viruses	no rank	Human papillomavirus type 113	587351	333924	2009-05-29 18:00:34	dsDNA viruses, no RNA stage				Viruses	Papillomaviridae	Betapapillomavirus	Betapapillomavirus 2
	238800244	7935	Viruses	no rank	Macaca fascicularis papillomavirus type 3	471181	10570	2008-07-30 18:00:21	dsDNA viruses, no RNA stage				Viruses	Papillomaviridae	Alphapapillomavirus	Alphapapillomavirus 12
	253558906	8014	Viruses	no rank	Macaca fascicularis papillomavirus type 11	656889	10570	2009-07-14 18:00:37	dsDNA viruses, no RNA stage				Viruses	Papillomaviridae	Alphapapillomavirus	Alphapapillomavirus 12
	254810663	7184	Viruses	no rank	Human papillomavirus 116	915428	1175851	2009-07-28 18:00:36	dsDNA viruses, no RNA stage				Viruses	Papillomaviridae	Gammapapillomavirus	Gammapapillomavirus 9
	255683756	7955	Viruses	no rank	Canine papillomavirus 7	658423	292792	2005-10-29 18:00:14	dsDNA viruses, no RNA stage	Canis familiaris papillomavirus 2			Viruses	Papillomaviridae	Taupapillomavirus	Taupapillomavirus 1
	255683764	7782	Viruses	no rank	Canine papillomavirus 5	658422	360397	2009-09-15 18:00:35	dsDNA viruses, no RNA stage	Canine papillomavirus 3			Viruses	Papillomaviridae	Chipapillomavirus	Chipapillomavirus 1
	255762023	7378	Viruses	no rank	Rattus norvegicus papillomavirus 1 EES-2009	664730	334212	2009-08-31 18:00:35	dsDNA viruses, no RNA stage				Viruses	Papillomaviridae	Pipapillomavirus	Pipapillomavirus 1
	256352174	7498	Viruses	no rank	Francolinus leucoscepus papillomavirus 1	485362	1177765	2008-07-30 18:00:21	dsDNA viruses, no RNA stage				Viruses	Papillomaviridae	Dyoepsilonpapillomavirus	Dyoepsilonpapillomavirus 1
	256807724	6911	Viruses	no rank	Human papillomavirus type 117	720708	337039	2010-02-19 18:00:39	dsDNA viruses, no RNA stage				Viruses	Papillomaviridae	Alphapapillomavirus	Alphapapillomavirus 2
	256807731	7597	Viruses	no rank	Human papillomavirus type 118	927771	337051	2010-11-18 18:00:47	dsDNA viruses, no RNA stage				Viruses	Papillomaviridae	Betapapillomavirus	Betapapillomavirus 1
	256860447	1149	Viruses	no rank	Rhesus papillomavirus type 1b	464935	10570	2008-07-30 18:00:21	dsDNA viruses, no RNA stage				Viruses	Papillomaviridae	Alphapapillomavirus	Alphapapillomavirus 12
	258611059	8242	Viruses	no rank	Canis familiaris papillomavirus 6	1513269	1175854	2014-06-24 19:01:57	dsDNA viruses, no RNA stage				Viruses	Papillomaviridae	Lambdapapillomavirus	Lambdapapillomavirus 3
	260169909	7855	Viruses	no rank	Human papillomavirus type 42	10590	337048	1993-08-03 01:00:00	dsDNA viruses, no RNA stage				Viruses	Papillomaviridae	Alphapapillomavirus	Alphapapillomavirus 1
	260169916	7960	Viruses	no rank	Human papillomavirus type 52	10618	337041	1993-08-02 01:00:00	dsDNA viruses, no RNA stage				Viruses	Papillomaviridae	Alphapapillomavirus	Alphapapillomavirus 9
	260169930	7824	Viruses	no rank	Human papillomavirus type 58	10598	337041	1996-03-01	dsDNA viruses, no RNA stage				Viruses	Papillomaviridae	Alphapapillomavirus	Alphapapillomavirus 9
	260169939	7830	Viruses	no rank	Human papillomavirus type 68	45240	337042	1996-02-18	dsDNA viruses, no RNA stage				Viruses	Papillomaviridae	Alphapapillomavirus	Alphapapillomavirus 7
	262113834	7466	Viruses	no rank	Human papillomavirus type 98	587347	337051	2009-05-29 18:00:34	dsDNA viruses, no RNA stage				Viruses	Papillomaviridae	Betapapillomavirus	Betapapillomavirus 1
	270048212	7476	Viruses	no rank	Human papillomavirus type 115	696746	334207	2009-12-07 18:00:38	dsDNA viruses, no RNA stage				Viruses	Papillomaviridae	Betapapillomavirus	Betapapillomavirus 3
	270119448	7304	Viruses	no rank	Human papillomavirus type 120	765052	333924	2009-12-03 18:00:36	dsDNA viruses, no RNA stage				Viruses	Papillomaviridae	Betapapillomavirus	Betapapillomavirus 2
	289656451	8069	Viruses	no rank	Human papillomavirus type 114	735496	333767	2010-03-03 18:00:41	dsDNA viruses, no RNA stage				Viruses	Papillomaviridae	Alphapapillomavirus	Alphapapillomavirus 3
	290964853	7404	Viruses	no rank	Human papillomavirus type 150	743811	334209	2010-03-12 18:00:39	dsDNA viruses, no RNA stage				Viruses	Papillomaviridae	Betapapillomavirus	Betapapillomavirus 5
	290964861	7386	Viruses	no rank	Human papillomavirus type 151	743812	333924	2010-03-12 18:00:39	dsDNA viruses, no RNA stage				Viruses	Papillomaviridae	Betapapillomavirus	Betapapillomavirus 2
	296040251	7737	Viruses	no rank	Bettongia penicillata papillomavirus 1	759701	1513248	2010-05-08 18:00:45	dsDNA viruses, no RNA stage				Viruses	Papillomaviridae	Dyolambdapapillomavirus	Dyolambdapapillomavirus 1
	296495828	7251	Viruses	no rank	Human papillomavirus type 119	765051	1175850	2010-05-26 18:00:41	dsDNA viruses, no RNA stage				Viruses	Papillomaviridae	Gammapapillomavirus	Gammapapillomavirus 8
	296495836	7304	Viruses	no rank	Human papillomavirus type 120	765052	333924	2009-12-03 18:00:36	dsDNA viruses, no RNA stage				Viruses	Papillomaviridae	Betapapillomavirus	Betapapillomavirus 2
	296495852	7262	Viruses	no rank	Human papillomavirus type 122	765054	333924	2010-05-26 18:00:41	dsDNA viruses, no RNA stage				Viruses	Papillomaviridae	Betapapillomavirus	Betapapillomavirus 2
	296495860	7329	Viruses	no rank	Human papillomavirus type 123	765055	1175849	2010-05-26 18:00:41	dsDNA viruses, no RNA stage				Viruses	Papillomaviridae	Gammapapillomavirus	Gammapapillomavirus 7
	296495868	7489	Viruses	no rank	Human papillomavirus type 124	765056	337051	2010-05-26 18:00:41	dsDNA viruses, no RNA stage				Viruses	Papillomaviridae	Betapapillomavirus	Betapapillomavirus 1
	296936109	345	Viruses	no rank	Human papillomavirus type 16	333760	337041	1993-08-02 01:00:00	dsDNA viruses, no RNA stage				Viruses	Papillomaviridae	Alphapapillomavirus	Alphapapillomavirus 9
	297342356	7342	Viruses	no rank	Human papillomavirus type 121	915429	1175852	2010-05-26 18:00:41	dsDNA viruses, no RNA stage				Viruses	Papillomaviridae	Gammapapillomavirus	Gammapapillomavirus 10
	297523816	7510	Viruses	no rank	Human papillomavirus type 11	10580	333754	1994-09-28 01:00:00	dsDNA viruses, no RNA stage				Viruses	Papillomaviridae	Alphapapillomavirus	Alphapapillomavirus 10
	297523826	7522	Viruses	no rank	Human papillomavirus type 11	10580	333754	1994-09-28 01:00:00	dsDNA viruses, no RNA stage				Viruses	Papillomaviridae	Alphapapillomavirus	Alphapapillomavirus 10
	298103601	7515	Viruses	no rank	Human papillomavirus type 11	10580	333754	1994-09-28 01:00:00	dsDNA viruses, no RNA stage				Viruses	Papillomaviridae	Alphapapillomavirus	Alphapapillomavirus 10
	298103611	7515	Viruses	no rank	Human papillomavirus type 11	10580	333754	1994-09-28 01:00:00	dsDNA viruses, no RNA stage				Viruses	Papillomaviridae	Alphapapillomavirus	Alphapapillomavirus 10
	298103621	7526	Viruses	no rank	Human papillomavirus type 11	10580	333754	1994-09-28 01:00:00	dsDNA viruses, no RNA stage				Viruses	Papillomaviridae	Alphapapillomavirus	Alphapapillomavirus 10
	298103631	7515	Viruses	no rank	Human papillomavirus type 11	10580	333754	1994-09-28 01:00:00	dsDNA viruses, no RNA stage				Viruses	Papillomaviridae	Alphapapillomavirus	Alphapapillomavirus 10
	298103641	7515	Viruses	no rank	Human papillomavirus type 11	10580	333754	1994-09-28 01:00:00	dsDNA viruses, no RNA stage				Viruses	Papillomaviridae	Alphapapillomavirus	Alphapapillomavirus 10
	298103651	7528	Viruses	no rank	Human papillomavirus type 11	10580	333754	1994-09-28 01:00:00	dsDNA viruses, no RNA stage				Viruses	Papillomaviridae	Alphapapillomavirus	Alphapapillomavirus 10
	298103661	7509	Viruses	no rank	Human papillomavirus type 11	10580	333754	1994-09-28 01:00:00	dsDNA viruses, no RNA stage				Viruses	Papillomaviridae	Alphapapillomavirus	Alphapapillomavirus 10
	298103671	7520	Viruses	no rank	Human papillomavirus type 11	10580	333754	1994-09-28 01:00:00	dsDNA viruses, no RNA stage				Viruses	Papillomaviridae	Alphapapillomavirus	Alphapapillomavirus 10
	300252217	7909	Viruses	no rank	Lagenorhynchus acutus papillomavirus	706530	496865	2011-04-04 18:00:35	dsDNA viruses, no RNA stage	Tursiops truncatus papillomavirus 1	Tursiops truncatus papillomavirus type 3		Viruses	Papillomaviridae	Upsilonpapillomavirus	Upsilonpapillomavirus 1
	300252705	7852	Viruses	no rank	Delphinus delphis papillomavirus	706524	936059	2011-04-04 18:00:35	dsDNA viruses, no RNA stage	Tursiops truncatus papillomavirus 1			Viruses	Papillomaviridae	Upsilonpapillomavirus	Upsilonpapillomavirus 1
	301173443	7510	Viruses	no rank	Mus musculus papillomavirus type 1	763552	1176145	2010-07-01 18:00:51	dsDNA viruses, no RNA stage				Viruses	Papillomaviridae	Pipapillomavirus	Pipapillomavirus 2
	301335131	7251	Viruses	no rank	Bovine papillomavirus type 11	714200	10561	2010-07-27 18:00:46	dsDNA viruses, no RNA stage				Viruses	Papillomaviridae	Xipapillomavirus	Xipapillomavirus 1
	304522114	7181	Viruses	no rank	Human papillomavirus type 127	746832	1513257	2010-08-25 18:00:44	dsDNA viruses, no RNA stage				Viruses	Papillomaviridae	Gammapapillomavirus	Gammapapillomavirus 12
	309273978	7164	Viruses	no rank	Human papillomavirus type 148	942038	1316040	2011-01-01 18:00:50	dsDNA viruses, no RNA stage	unclassified Gammapapillomavirus			Viruses	Papillomaviridae	Gammapapillomavirus	Human papillomavirus 132-like viruses
	310698439	7905	Viruses	no rank	Human papillomavirus type 16	333760	337041	1993-08-02 01:00:00	dsDNA viruses, no RNA stage				Viruses	Papillomaviridae	Alphapapillomavirus	Alphapapillomavirus 9
	312451772	6220	Viruses	no rank	Human papillomavirus type 94	260717	337039	2004-01-14 18:03:25	dsDNA viruses, no RNA stage				Viruses	Papillomaviridae	Alphapapillomavirus	Alphapapillomavirus 2
	312451781	7333	Viruses	no rank	Human papillomavirus type 149	909328	1175849	2011-01-01 18:00:50	dsDNA viruses, no RNA stage				Viruses	Papillomaviridae	Gammapapillomavirus	Gammapapillomavirus 7
	312451789	7388	Viruses	no rank	Human papillomavirus type 130	909329	1175852	2011-01-01 18:00:50	dsDNA viruses, no RNA stage				Viruses	Papillomaviridae	Gammapapillomavirus	Gammapapillomavirus 10
	312451813	7358	Viruses	no rank	Human papillomavirus type 133	909332	1175852	2011-01-01 18:00:50	dsDNA viruses, no RNA stage				Viruses	Papillomaviridae	Gammapapillomavirus	Gammapapillomavirus 10
	315629559	7836	Viruses	no rank	Human papillomavirus type 68b	940838	45240	2010-12-30 18:00:49	dsDNA viruses, no RNA stage	Human papillomavirus type 68			Viruses	Papillomaviridae	Alphapapillomavirus	Alphapapillomavirus 7
	318066353	404	Viruses	no rank	Human papillomavirus type 6	31552	333754	1993-08-13 01:00:00	dsDNA viruses, no RNA stage				Viruses	Papillomaviridae	Alphapapillomavirus	Alphapapillomavirus 10
	318066363	404	Viruses	no rank	Human papillomavirus type 6	31552	333754	1993-08-13 01:00:00	dsDNA viruses, no RNA stage				Viruses	Papillomaviridae	Alphapapillomavirus	Alphapapillomavirus 10
	318066373	404	Viruses	no rank	Human papillomavirus type 6	31552	333754	1993-08-13 01:00:00	dsDNA viruses, no RNA stage				Viruses	Papillomaviridae	Alphapapillomavirus	Alphapapillomavirus 10
	318066383	404	Viruses	no rank	Human papillomavirus type 6	31552	333754	1993-08-13 01:00:00	dsDNA viruses, no RNA stage				Viruses	Papillomaviridae	Alphapapillomavirus	Alphapapillomavirus 10
	318066393	402	Viruses	no rank	Human papillomavirus type 6	31552	333754	1993-08-13 01:00:00	dsDNA viruses, no RNA stage				Viruses	Papillomaviridae	Alphapapillomavirus	Alphapapillomavirus 10
	318066403	402	Viruses	no rank	Human papillomavirus type 6	31552	333754	1993-08-13 01:00:00	dsDNA viruses, no RNA stage				Viruses	Papillomaviridae	Alphapapillomavirus	Alphapapillomavirus 10
	318066413	744	Viruses	no rank	Human papillomavirus type 6	31552	333754	1993-08-13 01:00:00	dsDNA viruses, no RNA stage				Viruses	Papillomaviridae	Alphapapillomavirus	Alphapapillomavirus 10
	318066423	738	Viruses	no rank	Human papillomavirus type 6	31552	333754	1993-08-13 01:00:00	dsDNA viruses, no RNA stage				Viruses	Papillomaviridae	Alphapapillomavirus	Alphapapillomavirus 10
	318066433	730	Viruses	no rank	Human papillomavirus type 6	31552	333754	1993-08-13 01:00:00	dsDNA viruses, no RNA stage				Viruses	Papillomaviridae	Alphapapillomavirus	Alphapapillomavirus 10
	318066443	729	Viruses	no rank	Human papillomavirus type 6	31552	333754	1993-08-13 01:00:00	dsDNA viruses, no RNA stage				Viruses	Papillomaviridae	Alphapapillomavirus	Alphapapillomavirus 10
	318066453	751	Viruses	no rank	Human papillomavirus type 6	31552	333754	1993-08-13 01:00:00	dsDNA viruses, no RNA stage				Viruses	Papillomaviridae	Alphapapillomavirus	Alphapapillomavirus 10
	318066463	729	Viruses	no rank	Human papillomavirus type 6	31552	333754	1993-08-13 01:00:00	dsDNA viruses, no RNA stage				Viruses	Papillomaviridae	Alphapapillomavirus	Alphapapillomavirus 10
	318066473	729	Viruses	no rank	Human papillomavirus type 6	31552	333754	1993-08-13 01:00:00	dsDNA viruses, no RNA stage				Viruses	Papillomaviridae	Alphapapillomavirus	Alphapapillomavirus 10
	318066483	729	Viruses	no rank	Human papillomavirus type 6	31552	333754	1993-08-13 01:00:00	dsDNA viruses, no RNA stage				Viruses	Papillomaviridae	Alphapapillomavirus	Alphapapillomavirus 10
	318066493	729	Viruses	no rank	Human papillomavirus type 6	31552	333754	1993-08-13 01:00:00	dsDNA viruses, no RNA stage				Viruses	Papillomaviridae	Alphapapillomavirus	Alphapapillomavirus 10
	318066503	729	Viruses	no rank	Human papillomavirus type 6	31552	333754	1993-08-13 01:00:00	dsDNA viruses, no RNA stage				Viruses	Papillomaviridae	Alphapapillomavirus	Alphapapillomavirus 10
	318066513	711	Viruses	no rank	Human papillomavirus type 6	31552	333754	1993-08-13 01:00:00	dsDNA viruses, no RNA stage				Viruses	Papillomaviridae	Alphapapillomavirus	Alphapapillomavirus 10
	318066523	729	Viruses	no rank	Human papillomavirus type 6	31552	333754	1993-08-13 01:00:00	dsDNA viruses, no RNA stage				Viruses	Papillomaviridae	Alphapapillomavirus	Alphapapillomavirus 10
	318066533	729	Viruses	no rank	Human papillomavirus type 6	31552	333754	1993-08-13 01:00:00	dsDNA viruses, no RNA stage				Viruses	Papillomaviridae	Alphapapillomavirus	Alphapapillomavirus 10
	319962660	7309	Viruses	species	Human papillomavirus type 134	909333	735504	2011-01-01 18:00:50	dsDNA viruses, no RNA stage	unclassified Gammapapillomavirus			Viruses	Papillomaviridae	Gammapapillomavirus
	319962668	7125	Viruses	no rank	Human papillomavirus type 132	909331	1316040	2011-01-01 18:00:50	dsDNA viruses, no RNA stage	unclassified Gammapapillomavirus			Viruses	Papillomaviridae	Gammapapillomavirus	Human papillomavirus 132-like viruses
	319976668	7182	Viruses	no rank	Human papillomavirus type 131	909330	1513259	2011-01-01 18:00:50	dsDNA viruses, no RNA stage				Viruses	Papillomaviridae	Gammapapillomavirus	Gammapapillomavirus 14
	319976676	7219	Viruses	species	Human papillomavirus type 129	931210	735504	2011-01-01 18:00:50	dsDNA viruses, no RNA stage	unclassified Gammapapillomavirus			Viruses	Papillomaviridae	Gammapapillomavirus
	319976684	7259	Viruses	no rank	Human papillomavirus type 128	931209	1513258	2011-01-01 18:00:50	dsDNA viruses, no RNA stage				Viruses	Papillomaviridae	Gammapapillomavirus	Gammapapillomavirus 13
	320526310	8060	Viruses	no rank	Colobus guereza papillomavirus type 1	889812	931244	2011-06-17 18:00:45	dsDNA viruses, no RNA stage				Viruses	Papillomaviridae	Alphapapillomavirus	Alphapapillomavirus 14
	326631676	7679	Viruses	no rank	Camelus dromedarius papillomavirus type 1	996650	1513268	2011-03-20 18:00:29	dsDNA viruses, no RNA stage				Viruses	Papillomaviridae	Deltapapillomavirus	Deltapapillomavirus 6
	326631684	7906	Viruses	species	Camelus dromedarius papillomavirus type 2	996651	470213	2011-03-20 18:00:29	dsDNA viruses, no RNA stage	unclassified Deltapapillomavirus			Viruses	Papillomaviridae	Deltapapillomavirus
	332288077	7584	Viruses	no rank	Zalophus californianus papillomavirus 1	998829	1513250	2011-03-27 18:00:31	dsDNA viruses, no RNA stage				Viruses	Papillomaviridae	Dyonupapillomavirus	Dyonupapillomavirus 1
	333906187	100	Viruses	species	Kappapapillomavirus 2	10623	325457	1993-08-03 01:00:00	dsDNA viruses, no RNA stage				Viruses	Papillomaviridae	Kappapapillomavirus
	335334258	7515	Viruses	no rank	Human papillomavirus type 11	10580	333754	1994-09-28 01:00:00	dsDNA viruses, no RNA stage				Viruses	Papillomaviridae	Alphapapillomavirus	Alphapapillomavirus 10
	337237882	7908	Viruses	no rank	Human papillomavirus type 31	10585	337041	1993-08-02 01:00:00	dsDNA viruses, no RNA stage				Viruses	Papillomaviridae	Alphapapillomavirus	Alphapapillomavirus 9
	337237891	7920	Viruses	no rank	Human papillomavirus type 31	10585	337041	1993-08-02 01:00:00	dsDNA viruses, no RNA stage				Viruses	Papillomaviridae	Alphapapillomavirus	Alphapapillomavirus 9
	337237900	7914	Viruses	no rank	Human papillomavirus type 31	10585	337041	1993-08-02 01:00:00	dsDNA viruses, no RNA stage				Viruses	Papillomaviridae	Alphapapillomavirus	Alphapapillomavirus 9
	337237909	7908	Viruses	no rank	Human papillomavirus type 31	10585	337041	1993-08-02 01:00:00	dsDNA viruses, no RNA stage				Viruses	Papillomaviridae	Alphapapillomavirus	Alphapapillomavirus 9
	337237918	7908	Viruses	no rank	Human papillomavirus type 31	10585	337041	1993-08-02 01:00:00	dsDNA viruses, no RNA stage				Viruses	Papillomaviridae	Alphapapillomavirus	Alphapapillomavirus 9
	337237927	7908	Viruses	no rank	Human papillomavirus type 31	10585	337041	1993-08-02 01:00:00	dsDNA viruses, no RNA stage				Viruses	Papillomaviridae	Alphapapillomavirus	Alphapapillomavirus 9
	337237936	7902	Viruses	no rank	Human papillomavirus type 31	10585	337041	1993-08-02 01:00:00	dsDNA viruses, no RNA stage				Viruses	Papillomaviridae	Alphapapillomavirus	Alphapapillomavirus 9
	337237945	7902	Viruses	no rank	Human papillomavirus type 31	10585	337041	1993-08-02 01:00:00	dsDNA viruses, no RNA stage				Viruses	Papillomaviridae	Alphapapillomavirus	Alphapapillomavirus 9
	337237954	7942	Viruses	no rank	Human papillomavirus type 31	10585	337041	1993-08-02 01:00:00	dsDNA viruses, no RNA stage				Viruses	Papillomaviridae	Alphapapillomavirus	Alphapapillomavirus 9
	337237963	7945	Viruses	no rank	Human papillomavirus type 31	10585	337041	1993-08-02 01:00:00	dsDNA viruses, no RNA stage				Viruses	Papillomaviridae	Alphapapillomavirus	Alphapapillomavirus 9
	337237972	7898	Viruses	no rank	Human papillomavirus type 31	10585	337041	1993-08-02 01:00:00	dsDNA viruses, no RNA stage				Viruses	Papillomaviridae	Alphapapillomavirus	Alphapapillomavirus 9
	337237981	7898	Viruses	no rank	Human papillomavirus type 31	10585	337041	1993-08-02 01:00:00	dsDNA viruses, no RNA stage				Viruses	Papillomaviridae	Alphapapillomavirus	Alphapapillomavirus 9
	337237990	7895	Viruses	no rank	Human papillomavirus type 31	10585	337041	1993-08-02 01:00:00	dsDNA viruses, no RNA stage				Viruses	Papillomaviridae	Alphapapillomavirus	Alphapapillomavirus 9
	337237999	7892	Viruses	no rank	Human papillomavirus type 31	10585	337041	1993-08-02 01:00:00	dsDNA viruses, no RNA stage				Viruses	Papillomaviridae	Alphapapillomavirus	Alphapapillomavirus 9
	337238008	7886	Viruses	no rank	Human papillomavirus type 31	10585	337041	1993-08-02 01:00:00	dsDNA viruses, no RNA stage				Viruses	Papillomaviridae	Alphapapillomavirus	Alphapapillomavirus 9
	337238017	7892	Viruses	no rank	Human papillomavirus type 31	10585	337041	1993-08-02 01:00:00	dsDNA viruses, no RNA stage				Viruses	Papillomaviridae	Alphapapillomavirus	Alphapapillomavirus 9
	337238026	7878	Viruses	no rank	Human papillomavirus type 31	10585	337041	1993-08-02 01:00:00	dsDNA viruses, no RNA stage				Viruses	Papillomaviridae	Alphapapillomavirus	Alphapapillomavirus 9
	337238035	7878	Viruses	no rank	Human papillomavirus type 31	10585	337041	1993-08-02 01:00:00	dsDNA viruses, no RNA stage				Viruses	Papillomaviridae	Alphapapillomavirus	Alphapapillomavirus 9
	337238044	7878	Viruses	no rank	Human papillomavirus type 31	10585	337041	1993-08-02 01:00:00	dsDNA viruses, no RNA stage				Viruses	Papillomaviridae	Alphapapillomavirus	Alphapapillomavirus 9
	337238053	7878	Viruses	no rank	Human papillomavirus type 31	10585	337041	1993-08-02 01:00:00	dsDNA viruses, no RNA stage				Viruses	Papillomaviridae	Alphapapillomavirus	Alphapapillomavirus 9
	337238062	7878	Viruses	no rank	Human papillomavirus type 31	10585	337041	1993-08-02 01:00:00	dsDNA viruses, no RNA stage				Viruses	Papillomaviridae	Alphapapillomavirus	Alphapapillomavirus 9
	337238071	7878	Viruses	no rank	Human papillomavirus type 31	10585	337041	1993-08-02 01:00:00	dsDNA viruses, no RNA stage				Viruses	Papillomaviridae	Alphapapillomavirus	Alphapapillomavirus 9
	337238108	7910	Viruses	no rank	Human papillomavirus type 33	10586	337041	1993-08-02 01:00:00	dsDNA viruses, no RNA stage				Viruses	Papillomaviridae	Alphapapillomavirus	Alphapapillomavirus 9
	337238117	7912	Viruses	no rank	Human papillomavirus type 33	10586	337041	1993-08-02 01:00:00	dsDNA viruses, no RNA stage				Viruses	Papillomaviridae	Alphapapillomavirus	Alphapapillomavirus 9
	337238126	7912	Viruses	no rank	Human papillomavirus type 33	10586	337041	1993-08-02 01:00:00	dsDNA viruses, no RNA stage				Viruses	Papillomaviridae	Alphapapillomavirus	Alphapapillomavirus 9
	337238135	7909	Viruses	no rank	Human papillomavirus type 33	10586	337041	1993-08-02 01:00:00	dsDNA viruses, no RNA stage				Viruses	Papillomaviridae	Alphapapillomavirus	Alphapapillomavirus 9
	337238144	7909	Viruses	no rank	Human papillomavirus type 33	10586	337041	1993-08-02 01:00:00	dsDNA viruses, no RNA stage				Viruses	Papillomaviridae	Alphapapillomavirus	Alphapapillomavirus 9
	337238153	7909	Viruses	no rank	Human papillomavirus type 33	10586	337041	1993-08-02 01:00:00	dsDNA viruses, no RNA stage				Viruses	Papillomaviridae	Alphapapillomavirus	Alphapapillomavirus 9
	337238162	7909	Viruses	no rank	Human papillomavirus type 33	10586	337041	1993-08-02 01:00:00	dsDNA viruses, no RNA stage				Viruses	Papillomaviridae	Alphapapillomavirus	Alphapapillomavirus 9
	337238171	7911	Viruses	no rank	Human papillomavirus type 33	10586	337041	1993-08-02 01:00:00	dsDNA viruses, no RNA stage				Viruses	Papillomaviridae	Alphapapillomavirus	Alphapapillomavirus 9
	337238180	7912	Viruses	no rank	Human papillomavirus type 33	10586	337041	1993-08-02 01:00:00	dsDNA viruses, no RNA stage				Viruses	Papillomaviridae	Alphapapillomavirus	Alphapapillomavirus 9
	337238189	7908	Viruses	no rank	Human papillomavirus type 33	10586	337041	1993-08-02 01:00:00	dsDNA viruses, no RNA stage				Viruses	Papillomaviridae	Alphapapillomavirus	Alphapapillomavirus 9
	337238198	7831	Viruses	no rank	Human papillomavirus type 33	10586	337041	1993-08-02 01:00:00	dsDNA viruses, no RNA stage				Viruses	Papillomaviridae	Alphapapillomavirus	Alphapapillomavirus 9
	337238207	7830	Viruses	no rank	Human papillomavirus type 33	10586	337041	1993-08-02 01:00:00	dsDNA viruses, no RNA stage				Viruses	Papillomaviridae	Alphapapillomavirus	Alphapapillomavirus 9
	337238216	7830	Viruses	no rank	Human papillomavirus type 33	10586	337041	1993-08-02 01:00:00	dsDNA viruses, no RNA stage				Viruses	Papillomaviridae	Alphapapillomavirus	Alphapapillomavirus 9
	337238225	7833	Viruses	no rank	Human papillomavirus type 33	10586	337041	1993-08-02 01:00:00	dsDNA viruses, no RNA stage				Viruses	Papillomaviridae	Alphapapillomavirus	Alphapapillomavirus 9
	337238234	7838	Viruses	no rank	Human papillomavirus type 33	10586	337041	1993-08-02 01:00:00	dsDNA viruses, no RNA stage				Viruses	Papillomaviridae	Alphapapillomavirus	Alphapapillomavirus 9
	337238243	7830	Viruses	no rank	Human papillomavirus type 33	10586	337041	1993-08-02 01:00:00	dsDNA viruses, no RNA stage				Viruses	Papillomaviridae	Alphapapillomavirus	Alphapapillomavirus 9
	337238252	7830	Viruses	no rank	Human papillomavirus type 33	10586	337041	1993-08-02 01:00:00	dsDNA viruses, no RNA stage				Viruses	Papillomaviridae	Alphapapillomavirus	Alphapapillomavirus 9
	337238261	7832	Viruses	no rank	Human papillomavirus type 33	10586	337041	1993-08-02 01:00:00	dsDNA viruses, no RNA stage				Viruses	Papillomaviridae	Alphapapillomavirus	Alphapapillomavirus 9
	337238270	7830	Viruses	no rank	Human papillomavirus type 33	10586	337041	1993-08-02 01:00:00	dsDNA viruses, no RNA stage				Viruses	Papillomaviridae	Alphapapillomavirus	Alphapapillomavirus 9
	337238279	7830	Viruses	no rank	Human papillomavirus type 33	10586	337041	1993-08-02 01:00:00	dsDNA viruses, no RNA stage				Viruses	Papillomaviridae	Alphapapillomavirus	Alphapapillomavirus 9
	337238317	7879	Viruses	no rank	Human papillomavirus type 35	10587	337041	1993-08-02 01:00:00	dsDNA viruses, no RNA stage				Viruses	Papillomaviridae	Alphapapillomavirus	Alphapapillomavirus 9
	337238326	7879	Viruses	no rank	Human papillomavirus type 35	10587	337041	1993-08-02 01:00:00	dsDNA viruses, no RNA stage				Viruses	Papillomaviridae	Alphapapillomavirus	Alphapapillomavirus 9
	337238335	7879	Viruses	no rank	Human papillomavirus type 35	10587	337041	1993-08-02 01:00:00	dsDNA viruses, no RNA stage				Viruses	Papillomaviridae	Alphapapillomavirus	Alphapapillomavirus 9
	337238344	7879	Viruses	no rank	Human papillomavirus type 35	10587	337041	1993-08-02 01:00:00	dsDNA viruses, no RNA stage				Viruses	Papillomaviridae	Alphapapillomavirus	Alphapapillomavirus 9
	337238353	7879	Viruses	no rank	Human papillomavirus type 35	10587	337041	1993-08-02 01:00:00	dsDNA viruses, no RNA stage				Viruses	Papillomaviridae	Alphapapillomavirus	Alphapapillomavirus 9
	337238362	7883	Viruses	no rank	Human papillomavirus type 35	10587	337041	1993-08-02 01:00:00	dsDNA viruses, no RNA stage				Viruses	Papillomaviridae	Alphapapillomavirus	Alphapapillomavirus 9
	337238371	7894	Viruses	no rank	Human papillomavirus type 35	10587	337041	1993-08-02 01:00:00	dsDNA viruses, no RNA stage				Viruses	Papillomaviridae	Alphapapillomavirus	Alphapapillomavirus 9
	337238380	7883	Viruses	no rank	Human papillomavirus type 35	10587	337041	1993-08-02 01:00:00	dsDNA viruses, no RNA stage				Viruses	Papillomaviridae	Alphapapillomavirus	Alphapapillomavirus 9
	337238389	7894	Viruses	no rank	Human papillomavirus type 35	10587	337041	1993-08-02 01:00:00	dsDNA viruses, no RNA stage				Viruses	Papillomaviridae	Alphapapillomavirus	Alphapapillomavirus 9
	337238398	7894	Viruses	no rank	Human papillomavirus type 35	10587	337041	1993-08-02 01:00:00	dsDNA viruses, no RNA stage				Viruses	Papillomaviridae	Alphapapillomavirus	Alphapapillomavirus 9
	337238407	7894	Viruses	no rank	Human papillomavirus type 35	10587	337041	1993-08-02 01:00:00	dsDNA viruses, no RNA stage				Viruses	Papillomaviridae	Alphapapillomavirus	Alphapapillomavirus 9
	337238416	7885	Viruses	no rank	Human papillomavirus type 35	10587	337041	1993-08-02 01:00:00	dsDNA viruses, no RNA stage				Viruses	Papillomaviridae	Alphapapillomavirus	Alphapapillomavirus 9
	337238425	7885	Viruses	no rank	Human papillomavirus type 35	10587	337041	1993-08-02 01:00:00	dsDNA viruses, no RNA stage				Viruses	Papillomaviridae	Alphapapillomavirus	Alphapapillomavirus 9
	337238434	7879	Viruses	no rank	Human papillomavirus type 35	10587	337041	1993-08-02 01:00:00	dsDNA viruses, no RNA stage				Viruses	Papillomaviridae	Alphapapillomavirus	Alphapapillomavirus 9
	337238443	7881	Viruses	no rank	Human papillomavirus type 35	10587	337041	1993-08-02 01:00:00	dsDNA viruses, no RNA stage				Viruses	Papillomaviridae	Alphapapillomavirus	Alphapapillomavirus 9
	337238452	7876	Viruses	no rank	Human papillomavirus type 35	10587	337041	1993-08-02 01:00:00	dsDNA viruses, no RNA stage				Viruses	Papillomaviridae	Alphapapillomavirus	Alphapapillomavirus 9
	337238461	7878	Viruses	no rank	Human papillomavirus type 35	10587	337041	1993-08-02 01:00:00	dsDNA viruses, no RNA stage				Viruses	Papillomaviridae	Alphapapillomavirus	Alphapapillomavirus 9
	337238470	7879	Viruses	no rank	Human papillomavirus type 35	10587	337041	1993-08-02 01:00:00	dsDNA viruses, no RNA stage				Viruses	Papillomaviridae	Alphapapillomavirus	Alphapapillomavirus 9
	337238479	7879	Viruses	no rank	Human papillomavirus type 35	10587	337041	1993-08-02 01:00:00	dsDNA viruses, no RNA stage				Viruses	Papillomaviridae	Alphapapillomavirus	Alphapapillomavirus 9
	337238488	7879	Viruses	no rank	Human papillomavirus type 35	10587	337041	1993-08-02 01:00:00	dsDNA viruses, no RNA stage				Viruses	Papillomaviridae	Alphapapillomavirus	Alphapapillomavirus 9
	337238497	7899	Viruses	no rank	Human papillomavirus type 35	10587	337041	1993-08-02 01:00:00	dsDNA viruses, no RNA stage				Viruses	Papillomaviridae	Alphapapillomavirus	Alphapapillomavirus 9
	337238506	7908	Viruses	no rank	Human papillomavirus type 35	10587	337041	1993-08-02 01:00:00	dsDNA viruses, no RNA stage				Viruses	Papillomaviridae	Alphapapillomavirus	Alphapapillomavirus 9
	337238515	7908	Viruses	no rank	Human papillomavirus type 35	10587	337041	1993-08-02 01:00:00	dsDNA viruses, no RNA stage				Viruses	Papillomaviridae	Alphapapillomavirus	Alphapapillomavirus 9
	337238552	7937	Viruses	no rank	Human papillomavirus type 52	10618	337041	1993-08-02 01:00:00	dsDNA viruses, no RNA stage				Viruses	Papillomaviridae	Alphapapillomavirus	Alphapapillomavirus 9
	337238561	7937	Viruses	no rank	Human papillomavirus type 52	10618	337041	1993-08-02 01:00:00	dsDNA viruses, no RNA stage				Viruses	Papillomaviridae	Alphapapillomavirus	Alphapapillomavirus 9
	337238570	7937	Viruses	no rank	Human papillomavirus type 52	10618	337041	1993-08-02 01:00:00	dsDNA viruses, no RNA stage				Viruses	Papillomaviridae	Alphapapillomavirus	Alphapapillomavirus 9
	337238579	7937	Viruses	no rank	Human papillomavirus type 52	10618	337041	1993-08-02 01:00:00	dsDNA viruses, no RNA stage				Viruses	Papillomaviridae	Alphapapillomavirus	Alphapapillomavirus 9
	337238588	7937	Viruses	no rank	Human papillomavirus type 52	10618	337041	1993-08-02 01:00:00	dsDNA viruses, no RNA stage				Viruses	Papillomaviridae	Alphapapillomavirus	Alphapapillomavirus 9
	337238597	7937	Viruses	no rank	Human papillomavirus type 52	10618	337041	1993-08-02 01:00:00	dsDNA viruses, no RNA stage				Viruses	Papillomaviridae	Alphapapillomavirus	Alphapapillomavirus 9
	337238606	7937	Viruses	no rank	Human papillomavirus type 52	10618	337041	1993-08-02 01:00:00	dsDNA viruses, no RNA stage				Viruses	Papillomaviridae	Alphapapillomavirus	Alphapapillomavirus 9
	337238615	7933	Viruses	no rank	Human papillomavirus type 52	10618	337041	1993-08-02 01:00:00	dsDNA viruses, no RNA stage				Viruses	Papillomaviridae	Alphapapillomavirus	Alphapapillomavirus 9
	337238624	7933	Viruses	no rank	Human papillomavirus type 52	10618	337041	1993-08-02 01:00:00	dsDNA viruses, no RNA stage				Viruses	Papillomaviridae	Alphapapillomavirus	Alphapapillomavirus 9
	337238633	7962	Viruses	no rank	Human papillomavirus type 52	10618	337041	1993-08-02 01:00:00	dsDNA viruses, no RNA stage				Viruses	Papillomaviridae	Alphapapillomavirus	Alphapapillomavirus 9
	337238642	7951	Viruses	no rank	Human papillomavirus type 52	10618	337041	1993-08-02 01:00:00	dsDNA viruses, no RNA stage				Viruses	Papillomaviridae	Alphapapillomavirus	Alphapapillomavirus 9
	337238651	7944	Viruses	no rank	Human papillomavirus type 52	10618	337041	1993-08-02 01:00:00	dsDNA viruses, no RNA stage				Viruses	Papillomaviridae	Alphapapillomavirus	Alphapapillomavirus 9
	337238660	7960	Viruses	no rank	Human papillomavirus type 52	10618	337041	1993-08-02 01:00:00	dsDNA viruses, no RNA stage				Viruses	Papillomaviridae	Alphapapillomavirus	Alphapapillomavirus 9
	337238669	7974	Viruses	no rank	Human papillomavirus type 52	10618	337041	1993-08-02 01:00:00	dsDNA viruses, no RNA stage				Viruses	Papillomaviridae	Alphapapillomavirus	Alphapapillomavirus 9
	337238678	7962	Viruses	no rank	Human papillomavirus type 52	10618	337041	1993-08-02 01:00:00	dsDNA viruses, no RNA stage				Viruses	Papillomaviridae	Alphapapillomavirus	Alphapapillomavirus 9
	337238687	7962	Viruses	no rank	Human papillomavirus type 52	10618	337041	1993-08-02 01:00:00	dsDNA viruses, no RNA stage				Viruses	Papillomaviridae	Alphapapillomavirus	Alphapapillomavirus 9
	337238696	7937	Viruses	no rank	Human papillomavirus type 52	10618	337041	1993-08-02 01:00:00	dsDNA viruses, no RNA stage				Viruses	Papillomaviridae	Alphapapillomavirus	Alphapapillomavirus 9
	337238705	7937	Viruses	no rank	Human papillomavirus type 52	10618	337041	1993-08-02 01:00:00	dsDNA viruses, no RNA stage				Viruses	Papillomaviridae	Alphapapillomavirus	Alphapapillomavirus 9
	337238714	7951	Viruses	no rank	Human papillomavirus type 52	10618	337041	1993-08-02 01:00:00	dsDNA viruses, no RNA stage				Viruses	Papillomaviridae	Alphapapillomavirus	Alphapapillomavirus 9
	337238723	7951	Viruses	no rank	Human papillomavirus type 52	10618	337041	1993-08-02 01:00:00	dsDNA viruses, no RNA stage				Viruses	Papillomaviridae	Alphapapillomavirus	Alphapapillomavirus 9
	337238732	7934	Viruses	no rank	Human papillomavirus type 52	10618	337041	1993-08-02 01:00:00	dsDNA viruses, no RNA stage				Viruses	Papillomaviridae	Alphapapillomavirus	Alphapapillomavirus 9
	337238770	7824	Viruses	no rank	Human papillomavirus type 58	10598	337041	1996-03-01	dsDNA viruses, no RNA stage				Viruses	Papillomaviridae	Alphapapillomavirus	Alphapapillomavirus 9
	337238779	7824	Viruses	no rank	Human papillomavirus type 58	10598	337041	1996-03-01	dsDNA viruses, no RNA stage				Viruses	Papillomaviridae	Alphapapillomavirus	Alphapapillomavirus 9
	337238788	7824	Viruses	no rank	Human papillomavirus type 58	10598	337041	1996-03-01	dsDNA viruses, no RNA stage				Viruses	Papillomaviridae	Alphapapillomavirus	Alphapapillomavirus 9
	337238797	7824	Viruses	no rank	Human papillomavirus type 58	10598	337041	1996-03-01	dsDNA viruses, no RNA stage				Viruses	Papillomaviridae	Alphapapillomavirus	Alphapapillomavirus 9
	337238806	7836	Viruses	no rank	Human papillomavirus type 58	10598	337041	1996-03-01	dsDNA viruses, no RNA stage				Viruses	Papillomaviridae	Alphapapillomavirus	Alphapapillomavirus 9
	337238815	7836	Viruses	no rank	Human papillomavirus type 58	10598	337041	1996-03-01	dsDNA viruses, no RNA stage				Viruses	Papillomaviridae	Alphapapillomavirus	Alphapapillomavirus 9
	337238824	7836	Viruses	no rank	Human papillomavirus type 58	10598	337041	1996-03-01	dsDNA viruses, no RNA stage				Viruses	Papillomaviridae	Alphapapillomavirus	Alphapapillomavirus 9
	337238833	7836	Viruses	no rank	Human papillomavirus type 58	10598	337041	1996-03-01	dsDNA viruses, no RNA stage				Viruses	Papillomaviridae	Alphapapillomavirus	Alphapapillomavirus 9
	337238842	7836	Viruses	no rank	Human papillomavirus type 58	10598	337041	1996-03-01	dsDNA viruses, no RNA stage				Viruses	Papillomaviridae	Alphapapillomavirus	Alphapapillomavirus 9
	337238851	7823	Viruses	no rank	Human papillomavirus type 58	10598	337041	1996-03-01	dsDNA viruses, no RNA stage				Viruses	Papillomaviridae	Alphapapillomavirus	Alphapapillomavirus 9
	337238860	7823	Viruses	no rank	Human papillomavirus type 58	10598	337041	1996-03-01	dsDNA viruses, no RNA stage				Viruses	Papillomaviridae	Alphapapillomavirus	Alphapapillomavirus 9
	337238869	7823	Viruses	no rank	Human papillomavirus type 58	10598	337041	1996-03-01	dsDNA viruses, no RNA stage				Viruses	Papillomaviridae	Alphapapillomavirus	Alphapapillomavirus 9
	337238878	7825	Viruses	no rank	Human papillomavirus type 58	10598	337041	1996-03-01	dsDNA viruses, no RNA stage				Viruses	Papillomaviridae	Alphapapillomavirus	Alphapapillomavirus 9
	337238887	7825	Viruses	no rank	Human papillomavirus type 58	10598	337041	1996-03-01	dsDNA viruses, no RNA stage				Viruses	Papillomaviridae	Alphapapillomavirus	Alphapapillomavirus 9
	337238896	7814	Viruses	no rank	Human papillomavirus type 58	10598	337041	1996-03-01	dsDNA viruses, no RNA stage				Viruses	Papillomaviridae	Alphapapillomavirus	Alphapapillomavirus 9
	337238905	7814	Viruses	no rank	Human papillomavirus type 58	10598	337041	1996-03-01	dsDNA viruses, no RNA stage				Viruses	Papillomaviridae	Alphapapillomavirus	Alphapapillomavirus 9
	337238914	7814	Viruses	no rank	Human papillomavirus type 58	10598	337041	1996-03-01	dsDNA viruses, no RNA stage				Viruses	Papillomaviridae	Alphapapillomavirus	Alphapapillomavirus 9
	337238923	7817	Viruses	no rank	Human papillomavirus type 58	10598	337041	1996-03-01	dsDNA viruses, no RNA stage				Viruses	Papillomaviridae	Alphapapillomavirus	Alphapapillomavirus 9
	337238932	7817	Viruses	no rank	Human papillomavirus type 58	10598	337041	1996-03-01	dsDNA viruses, no RNA stage				Viruses	Papillomaviridae	Alphapapillomavirus	Alphapapillomavirus 9
	337238941	7817	Viruses	no rank	Human papillomavirus type 58	10598	337041	1996-03-01	dsDNA viruses, no RNA stage				Viruses	Papillomaviridae	Alphapapillomavirus	Alphapapillomavirus 9
	337238950	7820	Viruses	no rank	Human papillomavirus type 58	10598	337041	1996-03-01	dsDNA viruses, no RNA stage				Viruses	Papillomaviridae	Alphapapillomavirus	Alphapapillomavirus 9
	337238959	7820	Viruses	no rank	Human papillomavirus type 58	10598	337041	1996-03-01	dsDNA viruses, no RNA stage				Viruses	Papillomaviridae	Alphapapillomavirus	Alphapapillomavirus 9
	337238968	7820	Viruses	no rank	Human papillomavirus type 58	10598	337041	1996-03-01	dsDNA viruses, no RNA stage				Viruses	Papillomaviridae	Alphapapillomavirus	Alphapapillomavirus 9
	337238977	7820	Viruses	no rank	Human papillomavirus type 58	10598	337041	1996-03-01	dsDNA viruses, no RNA stage				Viruses	Papillomaviridae	Alphapapillomavirus	Alphapapillomavirus 9
	337238986	7820	Viruses	no rank	Human papillomavirus type 58	10598	337041	1996-03-01	dsDNA viruses, no RNA stage				Viruses	Papillomaviridae	Alphapapillomavirus	Alphapapillomavirus 9
	337238995	7820	Viruses	no rank	Human papillomavirus type 58	10598	337041	1996-03-01	dsDNA viruses, no RNA stage				Viruses	Papillomaviridae	Alphapapillomavirus	Alphapapillomavirus 9
	337239026	7819	Viruses	no rank	Human papillomavirus type 67	37120	337041	1994-11-28	dsDNA viruses, no RNA stage				Viruses	Papillomaviridae	Alphapapillomavirus	Alphapapillomavirus 9
	337239035	7819	Viruses	no rank	Human papillomavirus type 67	37120	337041	1994-11-28	dsDNA viruses, no RNA stage				Viruses	Papillomaviridae	Alphapapillomavirus	Alphapapillomavirus 9
	337239044	7803	Viruses	no rank	Human papillomavirus type 67	37120	337041	1994-11-28	dsDNA viruses, no RNA stage				Viruses	Papillomaviridae	Alphapapillomavirus	Alphapapillomavirus 9
	337239053	7803	Viruses	no rank	Human papillomavirus type 67	37120	337041	1994-11-28	dsDNA viruses, no RNA stage				Viruses	Papillomaviridae	Alphapapillomavirus	Alphapapillomavirus 9
	337239062	7809	Viruses	no rank	Human papillomavirus type 67	37120	337041	1994-11-28	dsDNA viruses, no RNA stage				Viruses	Papillomaviridae	Alphapapillomavirus	Alphapapillomavirus 9
	337239071	7809	Viruses	no rank	Human papillomavirus type 67	37120	337041	1994-11-28	dsDNA viruses, no RNA stage				Viruses	Papillomaviridae	Alphapapillomavirus	Alphapapillomavirus 9
	337239080	7809	Viruses	no rank	Human papillomavirus type 67	37120	337041	1994-11-28	dsDNA viruses, no RNA stage				Viruses	Papillomaviridae	Alphapapillomavirus	Alphapapillomavirus 9
	338209357	7632	Viruses	no rank	Macaca fascicularis papillomavirus 2	915424	1172193	2011-06-17 18:00:45	dsDNA viruses, no RNA stage				Viruses	Papillomaviridae	Betapapillomavirus	Betapapillomavirus 6
	338209365	7686	Viruses	no rank	Colobus guereza papillomavirus type 2	889813	52438	2011-06-17 18:00:45	dsDNA viruses, no RNA stage	unclassified Betapapillomavirus			Viruses	Papillomaviridae	Betapapillomavirus	Colobus monkey papillomavirus
	339639364	7792	Viruses	no rank	Human papillomavirus type 125	673323	337039	2009-09-20 18:00:35	dsDNA viruses, no RNA stage				Viruses	Papillomaviridae	Alphapapillomavirus	Alphapapillomavirus 2
	340544548	7515	Viruses	no rank	Human papillomavirus type 11	10580	333754	1994-09-28 01:00:00	dsDNA viruses, no RNA stage				Viruses	Papillomaviridae	Alphapapillomavirus	Alphapapillomavirus 10
	340544558	7499	Viruses	no rank	Human papillomavirus type 11	10580	333754	1994-09-28 01:00:00	dsDNA viruses, no RNA stage				Viruses	Papillomaviridae	Alphapapillomavirus	Alphapapillomavirus 10
	340544568	7515	Viruses	no rank	Human papillomavirus type 11	10580	333754	1994-09-28 01:00:00	dsDNA viruses, no RNA stage				Viruses	Papillomaviridae	Alphapapillomavirus	Alphapapillomavirus 10
	340544578	7522	Viruses	no rank	Human papillomavirus type 11	10580	333754	1994-09-28 01:00:00	dsDNA viruses, no RNA stage				Viruses	Papillomaviridae	Alphapapillomavirus	Alphapapillomavirus 10
	340544588	7499	Viruses	no rank	Human papillomavirus type 11	10580	333754	1994-09-28 01:00:00	dsDNA viruses, no RNA stage				Viruses	Papillomaviridae	Alphapapillomavirus	Alphapapillomavirus 10
	343174546	7197	Viruses	no rank	Bos taurus papillomavirus 12	1070324	1513273	2011-08-14 18:00:51	dsDNA viruses, no RNA stage				Viruses	Papillomaviridae	Xipapillomavirus	Xipapillomavirus 2
	343174555	3363	Viruses	no rank	Bos taurus papillomavirus 12	1070324	1513273	2011-08-14 18:00:51	dsDNA viruses, no RNA stage				Viruses	Papillomaviridae	Xipapillomavirus	Xipapillomavirus 2
	347750413	7048	Viruses	no rank	Morelia spilota papillomavirus 1	1081054	1513249	2011-09-24 18:02:37	dsDNA viruses, no RNA stage				Viruses	Papillomaviridae	Dyomupapillomavirus	Dyomupapillomavirus 1
	347750421	7784	Viruses	no rank	Canis familiaris papillomavirus 8	1081055	1513276	2011-09-24 18:02:37	dsDNA viruses, no RNA stage				Viruses	Papillomaviridae	Chipapillomavirus	Chipapillomavirus 3
	348659024	7810	Viruses	no rank	Canine papillomavirus 11	1091166	360397	2011-10-09 18:01:37	dsDNA viruses, no RNA stage	Canine papillomavirus 3			Viruses	Papillomaviridae	Chipapillomavirus	Chipapillomavirus 1
	356871241	7515	Viruses	no rank	Human papillomavirus type 11	10580	333754	1994-09-28 01:00:00	dsDNA viruses, no RNA stage				Viruses	Papillomaviridae	Alphapapillomavirus	Alphapapillomavirus 10
	356871251	7515	Viruses	no rank	Human papillomavirus type 11	10580	333754	1994-09-28 01:00:00	dsDNA viruses, no RNA stage				Viruses	Papillomaviridae	Alphapapillomavirus	Alphapapillomavirus 10
	356871261	7515	Viruses	no rank	Human papillomavirus type 11	10580	333754	1994-09-28 01:00:00	dsDNA viruses, no RNA stage				Viruses	Papillomaviridae	Alphapapillomavirus	Alphapapillomavirus 10
	356871271	7515	Viruses	no rank	Human papillomavirus type 11	10580	333754	1994-09-28 01:00:00	dsDNA viruses, no RNA stage				Viruses	Papillomaviridae	Alphapapillomavirus	Alphapapillomavirus 10
	356871281	7515	Viruses	no rank	Human papillomavirus type 11	10580	333754	1994-09-28 01:00:00	dsDNA viruses, no RNA stage				Viruses	Papillomaviridae	Alphapapillomavirus	Alphapapillomavirus 10
	356871291	7515	Viruses	no rank	Human papillomavirus type 11	10580	333754	1994-09-28 01:00:00	dsDNA viruses, no RNA stage				Viruses	Papillomaviridae	Alphapapillomavirus	Alphapapillomavirus 10
	356871301	7515	Viruses	no rank	Human papillomavirus type 11	10580	333754	1994-09-28 01:00:00	dsDNA viruses, no RNA stage				Viruses	Papillomaviridae	Alphapapillomavirus	Alphapapillomavirus 10
	356871311	7515	Viruses	no rank	Human papillomavirus type 11	10580	333754	1994-09-28 01:00:00	dsDNA viruses, no RNA stage				Viruses	Papillomaviridae	Alphapapillomavirus	Alphapapillomavirus 10
	356871321	7515	Viruses	no rank	Human papillomavirus type 11	10580	333754	1994-09-28 01:00:00	dsDNA viruses, no RNA stage				Viruses	Papillomaviridae	Alphapapillomavirus	Alphapapillomavirus 10
	356871331	7515	Viruses	no rank	Human papillomavirus type 11	10580	333754	1994-09-28 01:00:00	dsDNA viruses, no RNA stage				Viruses	Papillomaviridae	Alphapapillomavirus	Alphapapillomavirus 10
	356871341	7515	Viruses	no rank	Human papillomavirus type 11	10580	333754	1994-09-28 01:00:00	dsDNA viruses, no RNA stage				Viruses	Papillomaviridae	Alphapapillomavirus	Alphapapillomavirus 10
	356871351	7515	Viruses	no rank	Human papillomavirus type 11	10580	333754	1994-09-28 01:00:00	dsDNA viruses, no RNA stage				Viruses	Papillomaviridae	Alphapapillomavirus	Alphapapillomavirus 10
	356871361	7515	Viruses	no rank	Human papillomavirus type 11	10580	333754	1994-09-28 01:00:00	dsDNA viruses, no RNA stage				Viruses	Papillomaviridae	Alphapapillomavirus	Alphapapillomavirus 10
	356871371	7515	Viruses	no rank	Human papillomavirus type 11	10580	333754	1994-09-28 01:00:00	dsDNA viruses, no RNA stage				Viruses	Papillomaviridae	Alphapapillomavirus	Alphapapillomavirus 10
	356871381	7515	Viruses	no rank	Human papillomavirus type 11	10580	333754	1994-09-28 01:00:00	dsDNA viruses, no RNA stage				Viruses	Papillomaviridae	Alphapapillomavirus	Alphapapillomavirus 10
	356871391	7515	Viruses	no rank	Human papillomavirus type 11	10580	333754	1994-09-28 01:00:00	dsDNA viruses, no RNA stage				Viruses	Papillomaviridae	Alphapapillomavirus	Alphapapillomavirus 10
	356871401	7515	Viruses	no rank	Human papillomavirus type 11	10580	333754	1994-09-28 01:00:00	dsDNA viruses, no RNA stage				Viruses	Papillomaviridae	Alphapapillomavirus	Alphapapillomavirus 10
	358356460	7326	Viruses	no rank	Human papillomavirus type 126	1055684	1513256	2011-11-09 18:00:52	dsDNA viruses, no RNA stage				Viruses	Papillomaviridae	Gammapapillomavirus	Gammapapillomavirus 11
	363540888	7873	Viruses	species	Canine papillomavirus 9	1087108	333938	2011-10-09 18:01:37	dsDNA viruses, no RNA stage	unclassified Papillomaviridae	non-primate mammal papillomaviruses		Viruses	Papillomaviridae
	363540896	7774	Viruses	species	Canine papillomavirus 10	1087109	333938	2011-10-09 18:01:37	dsDNA viruses, no RNA stage	unclassified Papillomaviridae	non-primate mammal papillomaviruses		Viruses	Papillomaviridae
	374257624	169	Viruses	no rank	Human papillomavirus type 16	333760	337041	1993-08-02 01:00:00	dsDNA viruses, no RNA stage				Viruses	Papillomaviridae	Alphapapillomavirus	Alphapapillomavirus 9
	374257642	174	Viruses	no rank	Human papillomavirus type 16	333760	337041	1993-08-02 01:00:00	dsDNA viruses, no RNA stage				Viruses	Papillomaviridae	Alphapapillomavirus	Alphapapillomavirus 9
	374257660	173	Viruses	no rank	Human papillomavirus type 16	333760	337041	1993-08-02 01:00:00	dsDNA viruses, no RNA stage				Viruses	Papillomaviridae	Alphapapillomavirus	Alphapapillomavirus 9
	374257669	174	Viruses	no rank	Human papillomavirus type 16	333760	337041	1993-08-02 01:00:00	dsDNA viruses, no RNA stage				Viruses	Papillomaviridae	Alphapapillomavirus	Alphapapillomavirus 9
	374257678	120	Viruses	no rank	Human papillomavirus type 16	333760	337041	1993-08-02 01:00:00	dsDNA viruses, no RNA stage				Viruses	Papillomaviridae	Alphapapillomavirus	Alphapapillomavirus 9
	379046889	7516	Viruses	no rank	Human papillomavirus type 11	10580	333754	1994-09-28 01:00:00	dsDNA viruses, no RNA stage				Viruses	Papillomaviridae	Alphapapillomavirus	Alphapapillomavirus 10
	379046899	9713	Viruses	no rank	Human papillomavirus type 11	10580	333754	1994-09-28 01:00:00	dsDNA viruses, no RNA stage				Viruses	Papillomaviridae	Alphapapillomavirus	Alphapapillomavirus 10
	379059601	7855	Viruses	species	Trichechus manatus latirostris papillomavirus 2	1144379	333938	2012-02-13 18:00:54	dsDNA viruses, no RNA stage	unclassified Papillomaviridae	non-primate mammal papillomaviruses		Viruses	Papillomaviridae
	381138178	7515	Viruses	no rank	Human papillomavirus type 11	10580	333754	1994-09-28 01:00:00	dsDNA viruses, no RNA stage				Viruses	Papillomaviridae	Alphapapillomavirus	Alphapapillomavirus 10
	381138188	7515	Viruses	no rank	Human papillomavirus type 11	10580	333754	1994-09-28 01:00:00	dsDNA viruses, no RNA stage				Viruses	Papillomaviridae	Alphapapillomavirus	Alphapapillomavirus 10
	381138198	7515	Viruses	no rank	Human papillomavirus type 11	10580	333754	1994-09-28 01:00:00	dsDNA viruses, no RNA stage				Viruses	Papillomaviridae	Alphapapillomavirus	Alphapapillomavirus 10
	381138208	7515	Viruses	no rank	Human papillomavirus type 11	10580	333754	1994-09-28 01:00:00	dsDNA viruses, no RNA stage				Viruses	Papillomaviridae	Alphapapillomavirus	Alphapapillomavirus 10
	381138218	7515	Viruses	no rank	Human papillomavirus type 11	10580	333754	1994-09-28 01:00:00	dsDNA viruses, no RNA stage				Viruses	Papillomaviridae	Alphapapillomavirus	Alphapapillomavirus 10
	386576350	8008	Viruses	species	Papio hamadryas papillomavirus type 1	990303	333933	2012-03-29 18:00:53	dsDNA viruses, no RNA stage	unclassified Papillomaviridae	primate papillomaviruses		Viruses	Papillomaviridae
	386645020	7582	Viruses	no rank	Equus caballus papillomavirus 3	940834	1513253	2011-01-12 18:00:29	dsDNA viruses, no RNA stage				Viruses	Papillomaviridae	Dyorhopapillomavirus	Dyorhopapillomavirus 1
	386785679	7307	Viruses	no rank	Human papillomavirus type 120	765052	333924	2009-12-03 18:00:36	dsDNA viruses, no RNA stage				Viruses	Papillomaviridae	Betapapillomavirus	Betapapillomavirus 2
	386785687	7304	Viruses	no rank	Human papillomavirus type 120	765052	333924	2009-12-03 18:00:36	dsDNA viruses, no RNA stage				Viruses	Papillomaviridae	Betapapillomavirus	Betapapillomavirus 2
	388542469	7336	Viruses	no rank	Canine papillomavirus 12	1194330	1087108	2012-05-30 18:00:57	dsDNA viruses, no RNA stage	unclassified Papillomaviridae	non-primate mammal papillomaviruses		Viruses	Papillomaviridae		Canine papillomavirus 9
	389656400	7293	Viruses	no rank	Human papillomavirus type 135	1070408	1513260	2012-03-29 18:00:53	dsDNA viruses, no RNA stage				Viruses	Papillomaviridae	Gammapapillomavirus	Gammapapillomavirus 15
	389656408	7319	Viruses	species	Human papillomavirus type 136	1070409	173087	2012-03-29 18:00:53	dsDNA viruses, no RNA stage	unclassified Papillomaviridae	Human papillomavirus types		Viruses	Papillomaviridae
	389656416	7236	Viruses	no rank	Human papillomavirus type 137	1070410	1513261	2012-03-29 18:00:53	dsDNA viruses, no RNA stage				Viruses	Papillomaviridae	Gammapapillomavirus	Gammapapillomavirus 16
	389656424	7341	Viruses	species	Human papillomavirus type 140	1070413	173087	2012-03-29 18:00:53	dsDNA viruses, no RNA stage	unclassified Papillomaviridae	Human papillomavirus types		Viruses	Papillomaviridae
	389656432	7271	Viruses	no rank	Human papillomavirus type 144	1070417	1513262	2012-03-29 18:00:53	dsDNA viruses, no RNA stage				Viruses	Papillomaviridae	Gammapapillomavirus	Gammapapillomavirus 17
	389885555	148	Viruses	no rank	Human papillomavirus type 5	333923	337051	1993-08-02 01:00:00	dsDNA viruses, no RNA stage				Viruses	Papillomaviridae	Betapapillomavirus	Betapapillomavirus 1
	389885562	7426	Viruses	no rank	Human papillomavirus type 17	10607	333924	1993-08-02 01:00:00	dsDNA viruses, no RNA stage				Viruses	Papillomaviridae	Betapapillomavirus	Betapapillomavirus 2
	389885570	7397	Viruses	no rank	Human papillomavirus type 38	37959	333924	1995-01-14	dsDNA viruses, no RNA stage				Viruses	Papillomaviridae	Betapapillomavirus	Betapapillomavirus 2
	390432826	552	Viruses	no rank	Human papillomavirus type 6	31552	333754	1993-08-13 01:00:00	dsDNA viruses, no RNA stage				Viruses	Papillomaviridae	Alphapapillomavirus	Alphapapillomavirus 10
	390432836	552	Viruses	no rank	Human papillomavirus type 6	31552	333754	1993-08-13 01:00:00	dsDNA viruses, no RNA stage				Viruses	Papillomaviridae	Alphapapillomavirus	Alphapapillomavirus 10
	390432846	551	Viruses	no rank	Human papillomavirus type 6	31552	333754	1993-08-13 01:00:00	dsDNA viruses, no RNA stage				Viruses	Papillomaviridae	Alphapapillomavirus	Alphapapillomavirus 10
	390432856	552	Viruses	no rank	Human papillomavirus type 6	31552	333754	1993-08-13 01:00:00	dsDNA viruses, no RNA stage				Viruses	Papillomaviridae	Alphapapillomavirus	Alphapapillomavirus 10
	390432866	552	Viruses	no rank	Human papillomavirus type 6	31552	333754	1993-08-13 01:00:00	dsDNA viruses, no RNA stage				Viruses	Papillomaviridae	Alphapapillomavirus	Alphapapillomavirus 10
	390432876	552	Viruses	no rank	Human papillomavirus type 6	31552	333754	1993-08-13 01:00:00	dsDNA viruses, no RNA stage				Viruses	Papillomaviridae	Alphapapillomavirus	Alphapapillomavirus 10
	390432886	552	Viruses	no rank	Human papillomavirus type 6	31552	333754	1993-08-13 01:00:00	dsDNA viruses, no RNA stage				Viruses	Papillomaviridae	Alphapapillomavirus	Alphapapillomavirus 10
	390432896	561	Viruses	no rank	Human papillomavirus type 6	31552	333754	1993-08-13 01:00:00	dsDNA viruses, no RNA stage				Viruses	Papillomaviridae	Alphapapillomavirus	Alphapapillomavirus 10
	390432906	235	Viruses	no rank	Human papillomavirus type 6	31552	333754	1993-08-13 01:00:00	dsDNA viruses, no RNA stage				Viruses	Papillomaviridae	Alphapapillomavirus	Alphapapillomavirus 10
	390432916	235	Viruses	no rank	Human papillomavirus type 6	31552	333754	1993-08-13 01:00:00	dsDNA viruses, no RNA stage				Viruses	Papillomaviridae	Alphapapillomavirus	Alphapapillomavirus 10
	392283730	7635	Viruses	species	Phocoena phocoena papillomavirus 2	706526	333938	2011-04-04 18:00:35	dsDNA viruses, no RNA stage	unclassified Papillomaviridae	non-primate mammal papillomaviruses		Viruses	Papillomaviridae
	392283737	7348	Viruses	no rank	Phocoena phocoena papillomavirus 4	706527	1513252	2011-04-04 18:00:35	dsDNA viruses, no RNA stage				Viruses	Papillomaviridae	Dyopipapillomavirus	Dyopipapillomavirus 1
	392283758	7596	Viruses	species	Phocoena phocoena papillomavirus 1	706525	333938	2011-04-04 18:00:35	dsDNA viruses, no RNA stage	unclassified Papillomaviridae	non-primate mammal papillomaviruses		Viruses	Papillomaviridae
	393793799	7515	Viruses	no rank	Human papillomavirus type 11	10580	333754	1994-09-28 01:00:00	dsDNA viruses, no RNA stage				Viruses	Papillomaviridae	Alphapapillomavirus	Alphapapillomavirus 10
	393793809	7515	Viruses	no rank	Human papillomavirus type 11	10580	333754	1994-09-28 01:00:00	dsDNA viruses, no RNA stage				Viruses	Papillomaviridae	Alphapapillomavirus	Alphapapillomavirus 10
	393793819	7515	Viruses	no rank	Human papillomavirus type 11	10580	333754	1994-09-28 01:00:00	dsDNA viruses, no RNA stage				Viruses	Papillomaviridae	Alphapapillomavirus	Alphapapillomavirus 10
	393793829	729	Viruses	no rank	Human papillomavirus type 6	31552	333754	1993-08-13 01:00:00	dsDNA viruses, no RNA stage				Viruses	Papillomaviridae	Alphapapillomavirus	Alphapapillomavirus 10
	393793839	729	Viruses	no rank	Human papillomavirus type 6	31552	333754	1993-08-13 01:00:00	dsDNA viruses, no RNA stage				Viruses	Papillomaviridae	Alphapapillomavirus	Alphapapillomavirus 10
	393793849	729	Viruses	no rank	Human papillomavirus type 6	31552	333754	1993-08-13 01:00:00	dsDNA viruses, no RNA stage				Viruses	Papillomaviridae	Alphapapillomavirus	Alphapapillomavirus 10
	393793859	729	Viruses	no rank	Human papillomavirus type 6	31552	333754	1993-08-13 01:00:00	dsDNA viruses, no RNA stage				Viruses	Papillomaviridae	Alphapapillomavirus	Alphapapillomavirus 10
	393793869	402	Viruses	no rank	Human papillomavirus type 6	31552	333754	1993-08-13 01:00:00	dsDNA viruses, no RNA stage				Viruses	Papillomaviridae	Alphapapillomavirus	Alphapapillomavirus 10
	393793879	402	Viruses	no rank	Human papillomavirus type 6	31552	333754	1993-08-13 01:00:00	dsDNA viruses, no RNA stage				Viruses	Papillomaviridae	Alphapapillomavirus	Alphapapillomavirus 10
	393793889	402	Viruses	no rank	Human papillomavirus type 6	31552	333754	1993-08-13 01:00:00	dsDNA viruses, no RNA stage				Viruses	Papillomaviridae	Alphapapillomavirus	Alphapapillomavirus 10
	394332527	7820	Viruses	no rank	Human papillomavirus type 35	10587	337041	1993-08-02 01:00:00	dsDNA viruses, no RNA stage				Viruses	Papillomaviridae	Alphapapillomavirus	Alphapapillomavirus 9
	394332539	7894	Viruses	no rank	Human papillomavirus type 35	10587	337041	1993-08-02 01:00:00	dsDNA viruses, no RNA stage				Viruses	Papillomaviridae	Alphapapillomavirus	Alphapapillomavirus 9
	394332551	7879	Viruses	no rank	Human papillomavirus type 35	10587	337041	1993-08-02 01:00:00	dsDNA viruses, no RNA stage				Viruses	Papillomaviridae	Alphapapillomavirus	Alphapapillomavirus 9
	394332562	7879	Viruses	no rank	Human papillomavirus type 35	10587	337041	1993-08-02 01:00:00	dsDNA viruses, no RNA stage				Viruses	Papillomaviridae	Alphapapillomavirus	Alphapapillomavirus 9
	394556730	7515	Viruses	no rank	Human papillomavirus type 11	10580	333754	1994-09-28 01:00:00	dsDNA viruses, no RNA stage				Viruses	Papillomaviridae	Alphapapillomavirus	Alphapapillomavirus 10
	394556741	7515	Viruses	no rank	Human papillomavirus type 11	10580	333754	1994-09-28 01:00:00	dsDNA viruses, no RNA stage				Viruses	Papillomaviridae	Alphapapillomavirus	Alphapapillomavirus 10
	394556752	7515	Viruses	no rank	Human papillomavirus type 11	10580	333754	1994-09-28 01:00:00	dsDNA viruses, no RNA stage				Viruses	Papillomaviridae	Alphapapillomavirus	Alphapapillomavirus 10
	394556763	7520	Viruses	no rank	Human papillomavirus type 11	10580	333754	1994-09-28 01:00:00	dsDNA viruses, no RNA stage				Viruses	Papillomaviridae	Alphapapillomavirus	Alphapapillomavirus 10
	395627595	7431	Viruses	no rank	Human papillomavirus type 159	1209820	333924	2012-07-17 18:00:58	dsDNA viruses, no RNA stage				Viruses	Papillomaviridae	Betapapillomavirus	Betapapillomavirus 2
	396085025	169	Viruses	no rank	Human papillomavirus type 16	333760	337041	1993-08-02 01:00:00	dsDNA viruses, no RNA stage				Viruses	Papillomaviridae	Alphapapillomavirus	Alphapapillomavirus 9
	396085034	169	Viruses	no rank	Human papillomavirus type 16	333760	337041	1993-08-02 01:00:00	dsDNA viruses, no RNA stage				Viruses	Papillomaviridae	Alphapapillomavirus	Alphapapillomavirus 9
	396085043	169	Viruses	no rank	Human papillomavirus type 16	333760	337041	1993-08-02 01:00:00	dsDNA viruses, no RNA stage				Viruses	Papillomaviridae	Alphapapillomavirus	Alphapapillomavirus 9
	396085052	169	Viruses	no rank	Human papillomavirus type 16	333760	337041	1993-08-02 01:00:00	dsDNA viruses, no RNA stage				Viruses	Papillomaviridae	Alphapapillomavirus	Alphapapillomavirus 9
	399525642	154	Viruses	no rank	Human papillomavirus type 16	333760	337041	1993-08-02 01:00:00	dsDNA viruses, no RNA stage				Viruses	Papillomaviridae	Alphapapillomavirus	Alphapapillomavirus 9
	399525651	164	Viruses	no rank	Human papillomavirus type 16	333760	337041	1993-08-02 01:00:00	dsDNA viruses, no RNA stage				Viruses	Papillomaviridae	Alphapapillomavirus	Alphapapillomavirus 9
	399525660	162	Viruses	no rank	Human papillomavirus type 16	333760	337041	1993-08-02 01:00:00	dsDNA viruses, no RNA stage				Viruses	Papillomaviridae	Alphapapillomavirus	Alphapapillomavirus 9
	399525669	163	Viruses	no rank	Human papillomavirus type 16	333760	337041	1993-08-02 01:00:00	dsDNA viruses, no RNA stage				Viruses	Papillomaviridae	Alphapapillomavirus	Alphapapillomavirus 9
	399525678	175	Viruses	no rank	Human papillomavirus type 16	333760	337041	1993-08-02 01:00:00	dsDNA viruses, no RNA stage				Viruses	Papillomaviridae	Alphapapillomavirus	Alphapapillomavirus 9
	399525687	189	Viruses	no rank	Human papillomavirus type 16	333760	337041	1993-08-02 01:00:00	dsDNA viruses, no RNA stage				Viruses	Papillomaviridae	Alphapapillomavirus	Alphapapillomavirus 9
	399525696	110	Viruses	no rank	Human papillomavirus type 16	333760	337041	1993-08-02 01:00:00	dsDNA viruses, no RNA stage				Viruses	Papillomaviridae	Alphapapillomavirus	Alphapapillomavirus 9
	399525705	189	Viruses	no rank	Human papillomavirus type 16	333760	337041	1993-08-02 01:00:00	dsDNA viruses, no RNA stage				Viruses	Papillomaviridae	Alphapapillomavirus	Alphapapillomavirus 9
	399525732	176	Viruses	no rank	Human papillomavirus type 16	333760	337041	1993-08-02 01:00:00	dsDNA viruses, no RNA stage				Viruses	Papillomaviridae	Alphapapillomavirus	Alphapapillomavirus 9
	399525750	162	Viruses	no rank	Human papillomavirus type 16	333760	337041	1993-08-02 01:00:00	dsDNA viruses, no RNA stage				Viruses	Papillomaviridae	Alphapapillomavirus	Alphapapillomavirus 9
	399525759	148	Viruses	no rank	Human papillomavirus type 16	333760	337041	1993-08-02 01:00:00	dsDNA viruses, no RNA stage				Viruses	Papillomaviridae	Alphapapillomavirus	Alphapapillomavirus 9
	399525777	148	Viruses	no rank	Human papillomavirus type 16	333760	337041	1993-08-02 01:00:00	dsDNA viruses, no RNA stage				Viruses	Papillomaviridae	Alphapapillomavirus	Alphapapillomavirus 9
	399525786	192	Viruses	no rank	Human papillomavirus type 16	333760	337041	1993-08-02 01:00:00	dsDNA viruses, no RNA stage				Viruses	Papillomaviridae	Alphapapillomavirus	Alphapapillomavirus 9
	399525795	188	Viruses	no rank	Human papillomavirus type 16	333760	337041	1993-08-02 01:00:00	dsDNA viruses, no RNA stage				Viruses	Papillomaviridae	Alphapapillomavirus	Alphapapillomavirus 9
	399525804	175	Viruses	no rank	Human papillomavirus type 16	333760	337041	1993-08-02 01:00:00	dsDNA viruses, no RNA stage				Viruses	Papillomaviridae	Alphapapillomavirus	Alphapapillomavirus 9
	399525822	181	Viruses	no rank	Human papillomavirus type 16	333760	337041	1993-08-02 01:00:00	dsDNA viruses, no RNA stage				Viruses	Papillomaviridae	Alphapapillomavirus	Alphapapillomavirus 9
	399525876	176	Viruses	no rank	Human papillomavirus type 16	333760	337041	1993-08-02 01:00:00	dsDNA viruses, no RNA stage				Viruses	Papillomaviridae	Alphapapillomavirus	Alphapapillomavirus 9
	399525894	175	Viruses	no rank	Human papillomavirus type 16	333760	337041	1993-08-02 01:00:00	dsDNA viruses, no RNA stage				Viruses	Papillomaviridae	Alphapapillomavirus	Alphapapillomavirus 9
	399525921	106	Viruses	no rank	Human papillomavirus type 16	333760	337041	1993-08-02 01:00:00	dsDNA viruses, no RNA stage				Viruses	Papillomaviridae	Alphapapillomavirus	Alphapapillomavirus 9
	399525930	175	Viruses	no rank	Human papillomavirus type 16	333760	337041	1993-08-02 01:00:00	dsDNA viruses, no RNA stage				Viruses	Papillomaviridae	Alphapapillomavirus	Alphapapillomavirus 9
	399525939	189	Viruses	no rank	Human papillomavirus type 16	333760	337041	1993-08-02 01:00:00	dsDNA viruses, no RNA stage				Viruses	Papillomaviridae	Alphapapillomavirus	Alphapapillomavirus 9
	399525966	176	Viruses	no rank	Human papillomavirus type 16	333760	337041	1993-08-02 01:00:00	dsDNA viruses, no RNA stage				Viruses	Papillomaviridae	Alphapapillomavirus	Alphapapillomavirus 9
	399525993	174	Viruses	no rank	Human papillomavirus type 16	333760	337041	1993-08-02 01:00:00	dsDNA viruses, no RNA stage				Viruses	Papillomaviridae	Alphapapillomavirus	Alphapapillomavirus 9
	399526002	177	Viruses	no rank	Human papillomavirus type 16	333760	337041	1993-08-02 01:00:00	dsDNA viruses, no RNA stage				Viruses	Papillomaviridae	Alphapapillomavirus	Alphapapillomavirus 9
	399526011	175	Viruses	no rank	Human papillomavirus type 16	333760	337041	1993-08-02 01:00:00	dsDNA viruses, no RNA stage				Viruses	Papillomaviridae	Alphapapillomavirus	Alphapapillomavirus 9
	399526020	310	Viruses	no rank	Human papillomavirus type 16	333760	337041	1993-08-02 01:00:00	dsDNA viruses, no RNA stage				Viruses	Papillomaviridae	Alphapapillomavirus	Alphapapillomavirus 9
	399526038	299	Viruses	no rank	Human papillomavirus type 16	333760	337041	1993-08-02 01:00:00	dsDNA viruses, no RNA stage				Viruses	Papillomaviridae	Alphapapillomavirus	Alphapapillomavirus 9
	399526074	174	Viruses	no rank	Human papillomavirus type 16	333760	337041	1993-08-02 01:00:00	dsDNA viruses, no RNA stage				Viruses	Papillomaviridae	Alphapapillomavirus	Alphapapillomavirus 9
	399526101	174	Viruses	no rank	Human papillomavirus type 16	333760	337041	1993-08-02 01:00:00	dsDNA viruses, no RNA stage				Viruses	Papillomaviridae	Alphapapillomavirus	Alphapapillomavirus 9
	399526110	180	Viruses	no rank	Human papillomavirus type 16	333760	337041	1993-08-02 01:00:00	dsDNA viruses, no RNA stage				Viruses	Papillomaviridae	Alphapapillomavirus	Alphapapillomavirus 9
	399526119	162	Viruses	no rank	Human papillomavirus type 16	333760	337041	1993-08-02 01:00:00	dsDNA viruses, no RNA stage				Viruses	Papillomaviridae	Alphapapillomavirus	Alphapapillomavirus 9
	399526128	148	Viruses	no rank	Human papillomavirus type 16	333760	337041	1993-08-02 01:00:00	dsDNA viruses, no RNA stage				Viruses	Papillomaviridae	Alphapapillomavirus	Alphapapillomavirus 9
	399526137	148	Viruses	no rank	Human papillomavirus type 16	333760	337041	1993-08-02 01:00:00	dsDNA viruses, no RNA stage				Viruses	Papillomaviridae	Alphapapillomavirus	Alphapapillomavirus 9
	399526146	162	Viruses	no rank	Human papillomavirus type 16	333760	337041	1993-08-02 01:00:00	dsDNA viruses, no RNA stage				Viruses	Papillomaviridae	Alphapapillomavirus	Alphapapillomavirus 9
	399526155	169	Viruses	no rank	Human papillomavirus type 16	333760	337041	1993-08-02 01:00:00	dsDNA viruses, no RNA stage				Viruses	Papillomaviridae	Alphapapillomavirus	Alphapapillomavirus 9
	399526164	169	Viruses	no rank	Human papillomavirus type 16	333760	337041	1993-08-02 01:00:00	dsDNA viruses, no RNA stage				Viruses	Papillomaviridae	Alphapapillomavirus	Alphapapillomavirus 9
	399526173	144	Viruses	no rank	Human papillomavirus type 16	333760	337041	1993-08-02 01:00:00	dsDNA viruses, no RNA stage				Viruses	Papillomaviridae	Alphapapillomavirus	Alphapapillomavirus 9
	399526191	110	Viruses	no rank	Human papillomavirus type 16	333760	337041	1993-08-02 01:00:00	dsDNA viruses, no RNA stage				Viruses	Papillomaviridae	Alphapapillomavirus	Alphapapillomavirus 9
	399526200	144	Viruses	no rank	Human papillomavirus type 16	333760	337041	1993-08-02 01:00:00	dsDNA viruses, no RNA stage				Viruses	Papillomaviridae	Alphapapillomavirus	Alphapapillomavirus 9
	402694777	7062	Viruses	no rank	Bos grunniens papillomavirus type 1	1229657	337052	2012-09-05 18:00:58	dsDNA viruses, no RNA stage				Viruses	Papillomaviridae	Deltapapillomavirus	Deltapapillomavirus 4
	402694786	7062	Viruses	no rank	Bos grunniens papillomavirus type 1	1229657	337052	2012-09-05 18:00:58	dsDNA viruses, no RNA stage				Viruses	Papillomaviridae	Deltapapillomavirus	Deltapapillomavirus 4
	402694795	7062	Viruses	no rank	Bos grunniens papillomavirus type 1	1229657	337052	2012-09-05 18:00:58	dsDNA viruses, no RNA stage				Viruses	Papillomaviridae	Deltapapillomavirus	Deltapapillomavirus 4
	402694804	7062	Viruses	no rank	Bos grunniens papillomavirus type 1	1229657	337052	2012-09-05 18:00:58	dsDNA viruses, no RNA stage				Viruses	Papillomaviridae	Deltapapillomavirus	Deltapapillomavirus 4
	402694813	7062	Viruses	no rank	Bos grunniens papillomavirus type 1	1229657	337052	2012-09-05 18:00:58	dsDNA viruses, no RNA stage				Viruses	Papillomaviridae	Deltapapillomavirus	Deltapapillomavirus 4
	402694822	7062	Viruses	no rank	Bos grunniens papillomavirus type 1	1229657	337052	2012-09-05 18:00:58	dsDNA viruses, no RNA stage				Viruses	Papillomaviridae	Deltapapillomavirus	Deltapapillomavirus 4
	404184232	8344	Viruses	no rank	Crocuta crocuta papillomavirus 1	1104917	1513272	2012-03-29 18:00:53	dsDNA viruses, no RNA stage				Viruses	Papillomaviridae	Lambdapapillomavirus	Lambdapapillomavirus 5
	404503488	6282	Viruses	no rank	Bovine papillomavirus type 13	1232138	337052	2012-10-06 18:00:43	dsDNA viruses, no RNA stage				Viruses	Papillomaviridae	Deltapapillomavirus	Deltapapillomavirus 4
	409183105	7252	Viruses	no rank	Human papillomavirus type 169	1315260	1513256	2013-04-05 07:01:16	dsDNA viruses, no RNA stage				Viruses	Papillomaviridae	Gammapapillomavirus	Gammapapillomavirus 11
	409183113	7119	Viruses	no rank	Human papillomavirus type 164	1315261	1175850	2013-04-05 07:01:16	dsDNA viruses, no RNA stage				Viruses	Papillomaviridae	Gammapapillomavirus	Gammapapillomavirus 8
	409183121	7233	Viruses	no rank	Human papillomavirus type 163	1315262	1513265	2013-04-05 07:01:16	dsDNA viruses, no RNA stage				Viruses	Papillomaviridae	Gammapapillomavirus	Gammapapillomavirus 20
	409183128	7174	Viruses	no rank	Human papillomavirus type 162	1315263	1513264	2013-04-05 07:01:16	dsDNA viruses, no RNA stage				Viruses	Papillomaviridae	Gammapapillomavirus	Gammapapillomavirus 19
	409183135	7238	Viruses	no rank	Human papillomavirus type 161	1315264	1513264	2013-04-05 07:01:16	dsDNA viruses, no RNA stage				Viruses	Papillomaviridae	Gammapapillomavirus	Gammapapillomavirus 19
	409183142	7417	Viruses	no rank	Human papillomavirus type 170	1315265	1175849	2013-04-05 07:01:16	dsDNA viruses, no RNA stage				Viruses	Papillomaviridae	Gammapapillomavirus	Gammapapillomavirus 7
	409183149	7129	Viruses	no rank	Human papillomavirus type 165	1315266	1316040	2013-04-05 07:01:16	dsDNA viruses, no RNA stage	unclassified Gammapapillomavirus			Viruses	Papillomaviridae	Gammapapillomavirus	Human papillomavirus 132-like viruses
	409183156	7143	Viruses	species	Human papillomavirus	10566	173087	1993-08-02 01:00:00	dsDNA viruses, no RNA stage	unclassified Papillomaviridae	Human papillomavirus types		Viruses	Papillomaviridae
	410118099	7212	Viruses	no rank	Human papillomavirus type 166	1315259	1513264	2013-04-05 07:01:16	dsDNA viruses, no RNA stage				Viruses	Papillomaviridae	Gammapapillomavirus	Gammapapillomavirus 19
	430025787	7826	Viruses	species	Canine papillomavirus 14	1236767	333938	2012-12-04 13:03:05	dsDNA viruses, no RNA stage	unclassified Papillomaviridae	non-primate mammal papillomaviruses		Viruses	Papillomaviridae
	444303709	7628	Viruses	no rank	Human papillomavirus type XS2	1288116	337039	2013-02-04 07:01:12	dsDNA viruses, no RNA stage				Viruses	Papillomaviridae	Alphapapillomavirus	Alphapapillomavirus 2
	448261092	7519	Viruses	species	Equus ferus caballus papillomavirus type 5	1235429	333938	2012-12-31 13:01:12	dsDNA viruses, no RNA stage	unclassified Papillomaviridae	non-primate mammal papillomaviruses		Viruses	Papillomaviridae
	448261100	7554	Viruses	species	Equus ferus caballus papillomavirus type 4	1235428	333938	2012-12-31 13:01:12	dsDNA viruses, no RNA stage	unclassified Papillomaviridae	non-primate mammal papillomaviruses		Viruses	Papillomaviridae
	470457100	7551	Viruses	species	Equine papillomavirus type 6	1235427	333938	2013-03-21 07:01:16	dsDNA viruses, no RNA stage	unclassified Papillomaviridae	non-primate mammal papillomaviruses		Viruses	Papillomaviridae
	470457140	7619	Viruses	species	Equus ferus caballus papillomavirus type 7	1235430	333938	2013-03-21 07:01:16	dsDNA viruses, no RNA stage	unclassified Papillomaviridae	non-primate mammal papillomaviruses		Viruses	Papillomaviridae
	511534171	7583	Viruses	species	Felis catus papillomavirus 3	1336600	1336599	2013-06-04 01:01:22	dsDNA viruses, no RNA stage	unclassified Taupapillomavirus			Viruses	Papillomaviridae	Taupapillomavirus
	512721866	7286	Viruses	species	Human papillomavirus type 154	1195796	173087	2013-06-05 19:01:22	dsDNA viruses, no RNA stage	unclassified Papillomaviridae	Human papillomavirus types		Viruses	Papillomaviridae
	523372239	7824	Viruses	no rank	Human papillomavirus type 58	10598	337041	1996-03-01	dsDNA viruses, no RNA stage				Viruses	Papillomaviridae	Alphapapillomavirus	Alphapapillomavirus 9
	523372248	7824	Viruses	no rank	Human papillomavirus type 58	10598	337041	1996-03-01	dsDNA viruses, no RNA stage				Viruses	Papillomaviridae	Alphapapillomavirus	Alphapapillomavirus 9
	523372257	7824	Viruses	no rank	Human papillomavirus type 58	10598	337041	1996-03-01	dsDNA viruses, no RNA stage				Viruses	Papillomaviridae	Alphapapillomavirus	Alphapapillomavirus 9
	525341911	175	Viruses	no rank	Human papillomavirus type 16	333760	337041	1993-08-02 01:00:00	dsDNA viruses, no RNA stage				Viruses	Papillomaviridae	Alphapapillomavirus	Alphapapillomavirus 9
	525341920	147	Viruses	no rank	Human papillomavirus type 16	333760	337041	1993-08-02 01:00:00	dsDNA viruses, no RNA stage				Viruses	Papillomaviridae	Alphapapillomavirus	Alphapapillomavirus 9
	525341957	7960	Viruses	no rank	Human papillomavirus type 52	10618	337041	1993-08-02 01:00:00	dsDNA viruses, no RNA stage				Viruses	Papillomaviridae	Alphapapillomavirus	Alphapapillomavirus 9
	525341966	7960	Viruses	no rank	Human papillomavirus type 52	10618	337041	1993-08-02 01:00:00	dsDNA viruses, no RNA stage				Viruses	Papillomaviridae	Alphapapillomavirus	Alphapapillomavirus 9
	525341975	7960	Viruses	no rank	Human papillomavirus type 52	10618	337041	1993-08-02 01:00:00	dsDNA viruses, no RNA stage				Viruses	Papillomaviridae	Alphapapillomavirus	Alphapapillomavirus 9
	525341984	7824	Viruses	no rank	Human papillomavirus type 58	10598	337041	1996-03-01	dsDNA viruses, no RNA stage				Viruses	Papillomaviridae	Alphapapillomavirus	Alphapapillomavirus 9
	525341993	7824	Viruses	no rank	Human papillomavirus type 58	10598	337041	1996-03-01	dsDNA viruses, no RNA stage				Viruses	Papillomaviridae	Alphapapillomavirus	Alphapapillomavirus 9
	525342002	7824	Viruses	no rank	Human papillomavirus type 58	10598	337041	1996-03-01	dsDNA viruses, no RNA stage				Viruses	Papillomaviridae	Alphapapillomavirus	Alphapapillomavirus 9
	525342011	7824	Viruses	no rank	Human papillomavirus type 58	10598	337041	1996-03-01	dsDNA viruses, no RNA stage				Viruses	Papillomaviridae	Alphapapillomavirus	Alphapapillomavirus 9
	525342020	7836	Viruses	no rank	Human papillomavirus type 58	10598	337041	1996-03-01	dsDNA viruses, no RNA stage				Viruses	Papillomaviridae	Alphapapillomavirus	Alphapapillomavirus 9
	526481953	6027	Viruses	no rank	Bovine papillomavirus type 2	10560	337052	1993-08-02 01:00:00	dsDNA viruses, no RNA stage				Viruses	Papillomaviridae	Deltapapillomavirus	Deltapapillomavirus 4
	529217046	7267	Viruses	species	Rangifer tarandus papillomavirus 2	1370094	333938	2013-07-31 07:01:31	dsDNA viruses, no RNA stage	unclassified Papillomaviridae	non-primate mammal papillomaviruses		Viruses	Papillomaviridae
	530787707	7228	Viruses	species	Human papillomavirus type 179	1472342	173087	2014-03-15 07:01:27	dsDNA viruses, no RNA stage	unclassified Papillomaviridae	Human papillomavirus types		Viruses	Papillomaviridae
	532235009	7270	Viruses	no rank	Bovine papillomavirus type 10	453461	10561	2007-12-22 18:00:33	dsDNA viruses, no RNA stage				Viruses	Papillomaviridae	Xipapillomavirus	Xipapillomavirus 1
	537801820	118	Viruses	no rank	Human papillomavirus type 18	333761	337042	1993-08-02 01:00:00	dsDNA viruses, no RNA stage				Viruses	Papillomaviridae	Alphapapillomavirus	Alphapapillomavirus 7
	537801830	118	Viruses	no rank	Human papillomavirus type 18	333761	337042	1993-08-02 01:00:00	dsDNA viruses, no RNA stage				Viruses	Papillomaviridae	Alphapapillomavirus	Alphapapillomavirus 7
	537801840	118	Viruses	no rank	Human papillomavirus type 18	333761	337042	1993-08-02 01:00:00	dsDNA viruses, no RNA stage				Viruses	Papillomaviridae	Alphapapillomavirus	Alphapapillomavirus 7
	537801850	118	Viruses	no rank	Human papillomavirus type 18	333761	337042	1993-08-02 01:00:00	dsDNA viruses, no RNA stage				Viruses	Papillomaviridae	Alphapapillomavirus	Alphapapillomavirus 7
	537801859	118	Viruses	no rank	Human papillomavirus type 18	333761	337042	1993-08-02 01:00:00	dsDNA viruses, no RNA stage				Viruses	Papillomaviridae	Alphapapillomavirus	Alphapapillomavirus 7
	537801868	118	Viruses	no rank	Human papillomavirus type 18	333761	337042	1993-08-02 01:00:00	dsDNA viruses, no RNA stage				Viruses	Papillomaviridae	Alphapapillomavirus	Alphapapillomavirus 7
	537801877	118	Viruses	no rank	Human papillomavirus type 18	333761	337042	1993-08-02 01:00:00	dsDNA viruses, no RNA stage				Viruses	Papillomaviridae	Alphapapillomavirus	Alphapapillomavirus 7
	537801886	118	Viruses	no rank	Human papillomavirus type 18	333761	337042	1993-08-02 01:00:00	dsDNA viruses, no RNA stage				Viruses	Papillomaviridae	Alphapapillomavirus	Alphapapillomavirus 7
	537801895	118	Viruses	no rank	Human papillomavirus type 18	333761	337042	1993-08-02 01:00:00	dsDNA viruses, no RNA stage				Viruses	Papillomaviridae	Alphapapillomavirus	Alphapapillomavirus 7
	537801906	118	Viruses	no rank	Human papillomavirus type 18	333761	337042	1993-08-02 01:00:00	dsDNA viruses, no RNA stage				Viruses	Papillomaviridae	Alphapapillomavirus	Alphapapillomavirus 7
	537801916	118	Viruses	no rank	Human papillomavirus type 18	333761	337042	1993-08-02 01:00:00	dsDNA viruses, no RNA stage				Viruses	Papillomaviridae	Alphapapillomavirus	Alphapapillomavirus 7
	537801926	118	Viruses	no rank	Human papillomavirus type 18	333761	337042	1993-08-02 01:00:00	dsDNA viruses, no RNA stage				Viruses	Papillomaviridae	Alphapapillomavirus	Alphapapillomavirus 7
	537801935	120	Viruses	no rank	Human papillomavirus type 18	333761	337042	1993-08-02 01:00:00	dsDNA viruses, no RNA stage				Viruses	Papillomaviridae	Alphapapillomavirus	Alphapapillomavirus 7
	537801945	120	Viruses	no rank	Human papillomavirus type 18	333761	337042	1993-08-02 01:00:00	dsDNA viruses, no RNA stage				Viruses	Papillomaviridae	Alphapapillomavirus	Alphapapillomavirus 7
	537801954	120	Viruses	no rank	Human papillomavirus type 18	333761	337042	1993-08-02 01:00:00	dsDNA viruses, no RNA stage				Viruses	Papillomaviridae	Alphapapillomavirus	Alphapapillomavirus 7
	537801991	7833	Viruses	no rank	Human papillomavirus type 39	10588	337042	1993-08-03 01:00:00	dsDNA viruses, no RNA stage				Viruses	Papillomaviridae	Alphapapillomavirus	Alphapapillomavirus 7
	537802000	7833	Viruses	no rank	Human papillomavirus type 39	10588	337042	1993-08-03 01:00:00	dsDNA viruses, no RNA stage				Viruses	Papillomaviridae	Alphapapillomavirus	Alphapapillomavirus 7
	537802009	7833	Viruses	no rank	Human papillomavirus type 39	10588	337042	1993-08-03 01:00:00	dsDNA viruses, no RNA stage				Viruses	Papillomaviridae	Alphapapillomavirus	Alphapapillomavirus 7
	537802018	7833	Viruses	no rank	Human papillomavirus type 39	10588	337042	1993-08-03 01:00:00	dsDNA viruses, no RNA stage				Viruses	Papillomaviridae	Alphapapillomavirus	Alphapapillomavirus 7
	537802027	7833	Viruses	no rank	Human papillomavirus type 39	10588	337042	1993-08-03 01:00:00	dsDNA viruses, no RNA stage				Viruses	Papillomaviridae	Alphapapillomavirus	Alphapapillomavirus 7
	537802037	7885	Viruses	no rank	Human papillomavirus type 39	10588	337042	1993-08-03 01:00:00	dsDNA viruses, no RNA stage				Viruses	Papillomaviridae	Alphapapillomavirus	Alphapapillomavirus 7
	537802048	7833	Viruses	no rank	Human papillomavirus type 39	10588	337042	1993-08-03 01:00:00	dsDNA viruses, no RNA stage				Viruses	Papillomaviridae	Alphapapillomavirus	Alphapapillomavirus 7
	537802059	7833	Viruses	no rank	Human papillomavirus type 39	10588	337042	1993-08-03 01:00:00	dsDNA viruses, no RNA stage				Viruses	Papillomaviridae	Alphapapillomavirus	Alphapapillomavirus 7
	537802068	7860	Viruses	no rank	Human papillomavirus type 39	10588	337042	1993-08-03 01:00:00	dsDNA viruses, no RNA stage				Viruses	Papillomaviridae	Alphapapillomavirus	Alphapapillomavirus 7
	537802077	7860	Viruses	no rank	Human papillomavirus type 39	10588	337042	1993-08-03 01:00:00	dsDNA viruses, no RNA stage				Viruses	Papillomaviridae	Alphapapillomavirus	Alphapapillomavirus 7
	537802086	7860	Viruses	no rank	Human papillomavirus type 39	10588	337042	1993-08-03 01:00:00	dsDNA viruses, no RNA stage				Viruses	Papillomaviridae	Alphapapillomavirus	Alphapapillomavirus 7
	537802095	7860	Viruses	no rank	Human papillomavirus type 39	10588	337042	1993-08-03 01:00:00	dsDNA viruses, no RNA stage				Viruses	Papillomaviridae	Alphapapillomavirus	Alphapapillomavirus 7
	537802104	7860	Viruses	no rank	Human papillomavirus type 39	10588	337042	1993-08-03 01:00:00	dsDNA viruses, no RNA stage				Viruses	Papillomaviridae	Alphapapillomavirus	Alphapapillomavirus 7
	537802113	7860	Viruses	no rank	Human papillomavirus type 39	10588	337042	1993-08-03 01:00:00	dsDNA viruses, no RNA stage				Viruses	Papillomaviridae	Alphapapillomavirus	Alphapapillomavirus 7
	537802122	7860	Viruses	no rank	Human papillomavirus type 39	10588	337042	1993-08-03 01:00:00	dsDNA viruses, no RNA stage				Viruses	Papillomaviridae	Alphapapillomavirus	Alphapapillomavirus 7
	537802136	7860	Viruses	no rank	Human papillomavirus type 39	10588	337042	1993-08-03 01:00:00	dsDNA viruses, no RNA stage				Viruses	Papillomaviridae	Alphapapillomavirus	Alphapapillomavirus 7
	537802145	7833	Viruses	no rank	Human papillomavirus type 39	10588	337042	1993-08-03 01:00:00	dsDNA viruses, no RNA stage				Viruses	Papillomaviridae	Alphapapillomavirus	Alphapapillomavirus 7
	537802154	7833	Viruses	no rank	Human papillomavirus type 39	10588	337042	1993-08-03 01:00:00	dsDNA viruses, no RNA stage				Viruses	Papillomaviridae	Alphapapillomavirus	Alphapapillomavirus 7
	537802165	7833	Viruses	no rank	Human papillomavirus type 39	10588	337042	1993-08-03 01:00:00	dsDNA viruses, no RNA stage				Viruses	Papillomaviridae	Alphapapillomavirus	Alphapapillomavirus 7
	537802176	7792	Viruses	no rank	Human papillomavirus type 45	10593	337042	1993-08-02 01:00:00	dsDNA viruses, no RNA stage				Viruses	Papillomaviridae	Alphapapillomavirus	Alphapapillomavirus 7
	537802222	7792	Viruses	no rank	Human papillomavirus type 45	10593	337042	1993-08-02 01:00:00	dsDNA viruses, no RNA stage				Viruses	Papillomaviridae	Alphapapillomavirus	Alphapapillomavirus 7
	537802231	7789	Viruses	no rank	Human papillomavirus type 45	10593	337042	1993-08-02 01:00:00	dsDNA viruses, no RNA stage				Viruses	Papillomaviridae	Alphapapillomavirus	Alphapapillomavirus 7
	537802238	7788	Viruses	no rank	Human papillomavirus type 45	10593	337042	1993-08-02 01:00:00	dsDNA viruses, no RNA stage				Viruses	Papillomaviridae	Alphapapillomavirus	Alphapapillomavirus 7
	537802249	7788	Viruses	no rank	Human papillomavirus type 45	10593	337042	1993-08-02 01:00:00	dsDNA viruses, no RNA stage				Viruses	Papillomaviridae	Alphapapillomavirus	Alphapapillomavirus 7
	537802256	7788	Viruses	no rank	Human papillomavirus type 45	10593	337042	1993-08-02 01:00:00	dsDNA viruses, no RNA stage				Viruses	Papillomaviridae	Alphapapillomavirus	Alphapapillomavirus 7
	537802263	7781	Viruses	no rank	Human papillomavirus type 45	10593	337042	1993-08-02 01:00:00	dsDNA viruses, no RNA stage				Viruses	Papillomaviridae	Alphapapillomavirus	Alphapapillomavirus 7
	537802272	7770	Viruses	no rank	Human papillomavirus type 45	10593	337042	1993-08-02 01:00:00	dsDNA viruses, no RNA stage				Viruses	Papillomaviridae	Alphapapillomavirus	Alphapapillomavirus 7
	537802280	7764	Viruses	no rank	Human papillomavirus type 45	10593	337042	1993-08-02 01:00:00	dsDNA viruses, no RNA stage				Viruses	Papillomaviridae	Alphapapillomavirus	Alphapapillomavirus 7
	537802287	7764	Viruses	no rank	Human papillomavirus type 45	10593	337042	1993-08-02 01:00:00	dsDNA viruses, no RNA stage				Viruses	Papillomaviridae	Alphapapillomavirus	Alphapapillomavirus 7
	537802294	7764	Viruses	no rank	Human papillomavirus type 45	10593	337042	1993-08-02 01:00:00	dsDNA viruses, no RNA stage				Viruses	Papillomaviridae	Alphapapillomavirus	Alphapapillomavirus 7
	537802304	7898	Viruses	no rank	Human papillomavirus type 59	37115	337042	1994-11-28	dsDNA viruses, no RNA stage				Viruses	Papillomaviridae	Alphapapillomavirus	Alphapapillomavirus 7
	537802314	7898	Viruses	no rank	Human papillomavirus type 59	37115	337042	1994-11-28	dsDNA viruses, no RNA stage				Viruses	Papillomaviridae	Alphapapillomavirus	Alphapapillomavirus 7
	537802324	7897	Viruses	no rank	Human papillomavirus type 59	37115	337042	1994-11-28	dsDNA viruses, no RNA stage				Viruses	Papillomaviridae	Alphapapillomavirus	Alphapapillomavirus 7
	537802335	7898	Viruses	no rank	Human papillomavirus type 59	37115	337042	1994-11-28	dsDNA viruses, no RNA stage				Viruses	Papillomaviridae	Alphapapillomavirus	Alphapapillomavirus 7
	537802344	7898	Viruses	no rank	Human papillomavirus type 59	37115	337042	1994-11-28	dsDNA viruses, no RNA stage				Viruses	Papillomaviridae	Alphapapillomavirus	Alphapapillomavirus 7
	537802353	7898	Viruses	no rank	Human papillomavirus type 59	37115	337042	1994-11-28	dsDNA viruses, no RNA stage				Viruses	Papillomaviridae	Alphapapillomavirus	Alphapapillomavirus 7
	537802364	7822	Viruses	no rank	Human papillomavirus type 68	45240	337042	1996-02-18	dsDNA viruses, no RNA stage				Viruses	Papillomaviridae	Alphapapillomavirus	Alphapapillomavirus 7
	537802373	7822	Viruses	no rank	Human papillomavirus type 68	45240	337042	1996-02-18	dsDNA viruses, no RNA stage				Viruses	Papillomaviridae	Alphapapillomavirus	Alphapapillomavirus 7
	537802415	7822	Viruses	no rank	Human papillomavirus type 68	45240	337042	1996-02-18	dsDNA viruses, no RNA stage				Viruses	Papillomaviridae	Alphapapillomavirus	Alphapapillomavirus 7
	537802423	7814	Viruses	no rank	Human papillomavirus type 68	45240	337042	1996-02-18	dsDNA viruses, no RNA stage				Viruses	Papillomaviridae	Alphapapillomavirus	Alphapapillomavirus 7
	537802432	7814	Viruses	no rank	Human papillomavirus type 68	45240	337042	1996-02-18	dsDNA viruses, no RNA stage				Viruses	Papillomaviridae	Alphapapillomavirus	Alphapapillomavirus 7
	537802441	7836	Viruses	no rank	Human papillomavirus type 68	45240	337042	1996-02-18	dsDNA viruses, no RNA stage				Viruses	Papillomaviridae	Alphapapillomavirus	Alphapapillomavirus 7
	537802451	7836	Viruses	no rank	Human papillomavirus type 68	45240	337042	1996-02-18	dsDNA viruses, no RNA stage				Viruses	Papillomaviridae	Alphapapillomavirus	Alphapapillomavirus 7
	537802459	7836	Viruses	no rank	Human papillomavirus type 68	45240	337042	1996-02-18	dsDNA viruses, no RNA stage				Viruses	Papillomaviridae	Alphapapillomavirus	Alphapapillomavirus 7
	537802468	7830	Viruses	no rank	Human papillomavirus type 68	45240	337042	1996-02-18	dsDNA viruses, no RNA stage				Viruses	Papillomaviridae	Alphapapillomavirus	Alphapapillomavirus 7
	537802476	7830	Viruses	no rank	Human papillomavirus type 68	45240	337042	1996-02-18	dsDNA viruses, no RNA stage				Viruses	Papillomaviridae	Alphapapillomavirus	Alphapapillomavirus 7
	537802485	7830	Viruses	no rank	Human papillomavirus type 68	45240	337042	1996-02-18	dsDNA viruses, no RNA stage				Viruses	Papillomaviridae	Alphapapillomavirus	Alphapapillomavirus 7
	537802493	7830	Viruses	no rank	Human papillomavirus type 68	45240	337042	1996-02-18	dsDNA viruses, no RNA stage				Viruses	Papillomaviridae	Alphapapillomavirus	Alphapapillomavirus 7
	537802502	7828	Viruses	no rank	Human papillomavirus type 68	45240	337042	1996-02-18	dsDNA viruses, no RNA stage				Viruses	Papillomaviridae	Alphapapillomavirus	Alphapapillomavirus 7
	537802510	7836	Viruses	no rank	Human papillomavirus type 68	45240	337042	1996-02-18	dsDNA viruses, no RNA stage				Viruses	Papillomaviridae	Alphapapillomavirus	Alphapapillomavirus 7
	537802518	7838	Viruses	no rank	Human papillomavirus type 68	45240	337042	1996-02-18	dsDNA viruses, no RNA stage				Viruses	Papillomaviridae	Alphapapillomavirus	Alphapapillomavirus 7
	537802527	7836	Viruses	no rank	Human papillomavirus type 68	45240	337042	1996-02-18	dsDNA viruses, no RNA stage				Viruses	Papillomaviridae	Alphapapillomavirus	Alphapapillomavirus 7
	537802536	7836	Viruses	no rank	Human papillomavirus type 68	45240	337042	1996-02-18	dsDNA viruses, no RNA stage				Viruses	Papillomaviridae	Alphapapillomavirus	Alphapapillomavirus 7
	537802544	7905	Viruses	no rank	Human papillomavirus type 70	39457	337042	1995-04-05 18:32:00	dsDNA viruses, no RNA stage				Viruses	Papillomaviridae	Alphapapillomavirus	Alphapapillomavirus 7
	537802553	7905	Viruses	no rank	Human papillomavirus type 70	39457	337042	1995-04-05 18:32:00	dsDNA viruses, no RNA stage				Viruses	Papillomaviridae	Alphapapillomavirus	Alphapapillomavirus 7
	537802562	7911	Viruses	no rank	Human papillomavirus type 70	39457	337042	1995-04-05 18:32:00	dsDNA viruses, no RNA stage				Viruses	Papillomaviridae	Alphapapillomavirus	Alphapapillomavirus 7
	537802571	7922	Viruses	no rank	Human papillomavirus type 70	39457	337042	1995-04-05 18:32:00	dsDNA viruses, no RNA stage				Viruses	Papillomaviridae	Alphapapillomavirus	Alphapapillomavirus 7
	537802581	7922	Viruses	no rank	Human papillomavirus type 70	39457	337042	1995-04-05 18:32:00	dsDNA viruses, no RNA stage				Viruses	Papillomaviridae	Alphapapillomavirus	Alphapapillomavirus 7
	537802590	7922	Viruses	no rank	Human papillomavirus type 70	39457	337042	1995-04-05 18:32:00	dsDNA viruses, no RNA stage				Viruses	Papillomaviridae	Alphapapillomavirus	Alphapapillomavirus 7
	537802600	7922	Viruses	no rank	Human papillomavirus type 70	39457	337042	1995-04-05 18:32:00	dsDNA viruses, no RNA stage				Viruses	Papillomaviridae	Alphapapillomavirus	Alphapapillomavirus 7
	537802609	7922	Viruses	no rank	Human papillomavirus type 70	39457	337042	1995-04-05 18:32:00	dsDNA viruses, no RNA stage				Viruses	Papillomaviridae	Alphapapillomavirus	Alphapapillomavirus 7
	538654784	7985	Viruses	species	Ferret papillomavirus	1394141	333938	2013-09-06 19:01:32	dsDNA viruses, no RNA stage	unclassified Papillomaviridae	non-primate mammal papillomaviruses		Viruses	Papillomaviridae
	545302080	7616	Viruses	species	Felis catus papillomavirus 4	1398507	1336599	2013-09-17 07:01:32	dsDNA viruses, no RNA stage	unclassified Taupapillomavirus			Viruses	Papillomaviridae	Taupapillomavirus
	556503837	7647	Viruses	species	Mesocricetus auratus papillomavirus 1	1408129	333938	2013-10-24 20:17:33	dsDNA viruses, no RNA stage	unclassified Papillomaviridae	non-primate mammal papillomaviruses		Viruses	Papillomaviridae
	557825766	7204	Viruses	no rank	Human papillomavirus type 168	1420544	1175850	2013-11-18 07:01:23	dsDNA viruses, no RNA stage				Viruses	Papillomaviridae	Gammapapillomavirus	Gammapapillomavirus 8
	559797726	7228	Viruses	species	Human papillomavirus type 167	1420545	735504	2013-11-18 07:01:23	dsDNA viruses, no RNA stage	unclassified Gammapapillomavirus			Viruses	Papillomaviridae	Gammapapillomavirus
	570364812	7435	Viruses	no rank	Castor canadensis papillomavirus 1	1352235	1513254	2013-12-18 07:01:24	dsDNA viruses, no RNA stage				Viruses	Papillomaviridae	Dyosigmapapillomavirus	Dyosigmapapillomavirus 1
	575072567	402	Viruses	no rank	Human papillomavirus type 6	31552	333754	1993-08-13 01:00:00	dsDNA viruses, no RNA stage				Viruses	Papillomaviridae	Alphapapillomavirus	Alphapapillomavirus 10
	575072577	729	Viruses	no rank	Human papillomavirus type 6	31552	333754	1993-08-13 01:00:00	dsDNA viruses, no RNA stage				Viruses	Papillomaviridae	Alphapapillomavirus	Alphapapillomavirus 10
	575072587	415	Viruses	no rank	Human papillomavirus type 6	31552	333754	1993-08-13 01:00:00	dsDNA viruses, no RNA stage				Viruses	Papillomaviridae	Alphapapillomavirus	Alphapapillomavirus 10
	575072597	744	Viruses	no rank	Human papillomavirus type 6	31552	333754	1993-08-13 01:00:00	dsDNA viruses, no RNA stage				Viruses	Papillomaviridae	Alphapapillomavirus	Alphapapillomavirus 10
	575072607	415	Viruses	no rank	Human papillomavirus type 6	31552	333754	1993-08-13 01:00:00	dsDNA viruses, no RNA stage				Viruses	Papillomaviridae	Alphapapillomavirus	Alphapapillomavirus 10
	575072617	415	Viruses	no rank	Human papillomavirus type 6	31552	333754	1993-08-13 01:00:00	dsDNA viruses, no RNA stage				Viruses	Papillomaviridae	Alphapapillomavirus	Alphapapillomavirus 10
	575072627	415	Viruses	no rank	Human papillomavirus type 6	31552	333754	1993-08-13 01:00:00	dsDNA viruses, no RNA stage				Viruses	Papillomaviridae	Alphapapillomavirus	Alphapapillomavirus 10
	575072637	836	Viruses	no rank	Human papillomavirus type 6	31552	333754	1993-08-13 01:00:00	dsDNA viruses, no RNA stage				Viruses	Papillomaviridae	Alphapapillomavirus	Alphapapillomavirus 10
	575072647	415	Viruses	no rank	Human papillomavirus type 6	31552	333754	1993-08-13 01:00:00	dsDNA viruses, no RNA stage				Viruses	Papillomaviridae	Alphapapillomavirus	Alphapapillomavirus 10
	575072657	415	Viruses	no rank	Human papillomavirus type 6	31552	333754	1993-08-13 01:00:00	dsDNA viruses, no RNA stage				Viruses	Papillomaviridae	Alphapapillomavirus	Alphapapillomavirus 10
	575072667	738	Viruses	no rank	Human papillomavirus type 6	31552	333754	1993-08-13 01:00:00	dsDNA viruses, no RNA stage				Viruses	Papillomaviridae	Alphapapillomavirus	Alphapapillomavirus 10
	575072677	415	Viruses	no rank	Human papillomavirus type 6	31552	333754	1993-08-13 01:00:00	dsDNA viruses, no RNA stage				Viruses	Papillomaviridae	Alphapapillomavirus	Alphapapillomavirus 10
	575072687	415	Viruses	no rank	Human papillomavirus type 6	31552	333754	1993-08-13 01:00:00	dsDNA viruses, no RNA stage				Viruses	Papillomaviridae	Alphapapillomavirus	Alphapapillomavirus 10
	575072697	415	Viruses	no rank	Human papillomavirus type 6	31552	333754	1993-08-13 01:00:00	dsDNA viruses, no RNA stage				Viruses	Papillomaviridae	Alphapapillomavirus	Alphapapillomavirus 10
	575072707	415	Viruses	no rank	Human papillomavirus type 6	31552	333754	1993-08-13 01:00:00	dsDNA viruses, no RNA stage				Viruses	Papillomaviridae	Alphapapillomavirus	Alphapapillomavirus 10
	575072717	731	Viruses	no rank	Human papillomavirus type 6	31552	333754	1993-08-13 01:00:00	dsDNA viruses, no RNA stage				Viruses	Papillomaviridae	Alphapapillomavirus	Alphapapillomavirus 10
	575072727	402	Viruses	no rank	Human papillomavirus type 6	31552	333754	1993-08-13 01:00:00	dsDNA viruses, no RNA stage				Viruses	Papillomaviridae	Alphapapillomavirus	Alphapapillomavirus 10
	575072737	762	Viruses	no rank	Human papillomavirus type 6	31552	333754	1993-08-13 01:00:00	dsDNA viruses, no RNA stage				Viruses	Papillomaviridae	Alphapapillomavirus	Alphapapillomavirus 10
	575072747	744	Viruses	no rank	Human papillomavirus type 6	31552	333754	1993-08-13 01:00:00	dsDNA viruses, no RNA stage				Viruses	Papillomaviridae	Alphapapillomavirus	Alphapapillomavirus 10
	575072757	634	Viruses	no rank	Human papillomavirus type 6	31552	333754	1993-08-13 01:00:00	dsDNA viruses, no RNA stage				Viruses	Papillomaviridae	Alphapapillomavirus	Alphapapillomavirus 10
	575072767	732	Viruses	no rank	Human papillomavirus type 6	31552	333754	1993-08-13 01:00:00	dsDNA viruses, no RNA stage				Viruses	Papillomaviridae	Alphapapillomavirus	Alphapapillomavirus 10
	575072777	929	Viruses	no rank	Human papillomavirus type 6	31552	333754	1993-08-13 01:00:00	dsDNA viruses, no RNA stage				Viruses	Papillomaviridae	Alphapapillomavirus	Alphapapillomavirus 10
	575072787	729	Viruses	no rank	Human papillomavirus type 6	31552	333754	1993-08-13 01:00:00	dsDNA viruses, no RNA stage				Viruses	Papillomaviridae	Alphapapillomavirus	Alphapapillomavirus 10
	575072797	745	Viruses	no rank	Human papillomavirus type 6	31552	333754	1993-08-13 01:00:00	dsDNA viruses, no RNA stage				Viruses	Papillomaviridae	Alphapapillomavirus	Alphapapillomavirus 10
	575072807	729	Viruses	no rank	Human papillomavirus type 6	31552	333754	1993-08-13 01:00:00	dsDNA viruses, no RNA stage				Viruses	Papillomaviridae	Alphapapillomavirus	Alphapapillomavirus 10
	575072817	729	Viruses	no rank	Human papillomavirus type 6	31552	333754	1993-08-13 01:00:00	dsDNA viruses, no RNA stage				Viruses	Papillomaviridae	Alphapapillomavirus	Alphapapillomavirus 10
	575072827	711	Viruses	no rank	Human papillomavirus type 6	31552	333754	1993-08-13 01:00:00	dsDNA viruses, no RNA stage				Viruses	Papillomaviridae	Alphapapillomavirus	Alphapapillomavirus 10
	575072837	729	Viruses	no rank	Human papillomavirus type 6	31552	333754	1993-08-13 01:00:00	dsDNA viruses, no RNA stage				Viruses	Papillomaviridae	Alphapapillomavirus	Alphapapillomavirus 10
	575072847	744	Viruses	no rank	Human papillomavirus type 6	31552	333754	1993-08-13 01:00:00	dsDNA viruses, no RNA stage				Viruses	Papillomaviridae	Alphapapillomavirus	Alphapapillomavirus 10
	575072857	404	Viruses	no rank	Human papillomavirus type 6	31552	333754	1993-08-13 01:00:00	dsDNA viruses, no RNA stage				Viruses	Papillomaviridae	Alphapapillomavirus	Alphapapillomavirus 10
	575072867	744	Viruses	no rank	Human papillomavirus type 6	31552	333754	1993-08-13 01:00:00	dsDNA viruses, no RNA stage				Viruses	Papillomaviridae	Alphapapillomavirus	Alphapapillomavirus 10
	575072877	744	Viruses	no rank	Human papillomavirus type 6	31552	333754	1993-08-13 01:00:00	dsDNA viruses, no RNA stage				Viruses	Papillomaviridae	Alphapapillomavirus	Alphapapillomavirus 10
	575072887	402	Viruses	no rank	Human papillomavirus type 6	31552	333754	1993-08-13 01:00:00	dsDNA viruses, no RNA stage				Viruses	Papillomaviridae	Alphapapillomavirus	Alphapapillomavirus 10
	575072897	402	Viruses	no rank	Human papillomavirus type 6	31552	333754	1993-08-13 01:00:00	dsDNA viruses, no RNA stage				Viruses	Papillomaviridae	Alphapapillomavirus	Alphapapillomavirus 10
	575072907	729	Viruses	no rank	Human papillomavirus type 6	31552	333754	1993-08-13 01:00:00	dsDNA viruses, no RNA stage				Viruses	Papillomaviridae	Alphapapillomavirus	Alphapapillomavirus 10
	575072917	729	Viruses	no rank	Human papillomavirus type 6	31552	333754	1993-08-13 01:00:00	dsDNA viruses, no RNA stage				Viruses	Papillomaviridae	Alphapapillomavirus	Alphapapillomavirus 10
	575072927	729	Viruses	no rank	Human papillomavirus type 6	31552	333754	1993-08-13 01:00:00	dsDNA viruses, no RNA stage				Viruses	Papillomaviridae	Alphapapillomavirus	Alphapapillomavirus 10
	575072937	729	Viruses	no rank	Human papillomavirus type 6	31552	333754	1993-08-13 01:00:00	dsDNA viruses, no RNA stage				Viruses	Papillomaviridae	Alphapapillomavirus	Alphapapillomavirus 10
	575072947	729	Viruses	no rank	Human papillomavirus type 6	31552	333754	1993-08-13 01:00:00	dsDNA viruses, no RNA stage				Viruses	Papillomaviridae	Alphapapillomavirus	Alphapapillomavirus 10
	575072957	730	Viruses	no rank	Human papillomavirus type 6	31552	333754	1993-08-13 01:00:00	dsDNA viruses, no RNA stage				Viruses	Papillomaviridae	Alphapapillomavirus	Alphapapillomavirus 10
	575072967	729	Viruses	no rank	Human papillomavirus type 6	31552	333754	1993-08-13 01:00:00	dsDNA viruses, no RNA stage				Viruses	Papillomaviridae	Alphapapillomavirus	Alphapapillomavirus 10
	575072977	738	Viruses	no rank	Human papillomavirus type 6	31552	333754	1993-08-13 01:00:00	dsDNA viruses, no RNA stage				Viruses	Papillomaviridae	Alphapapillomavirus	Alphapapillomavirus 10
	575072987	730	Viruses	no rank	Human papillomavirus type 6	31552	333754	1993-08-13 01:00:00	dsDNA viruses, no RNA stage				Viruses	Papillomaviridae	Alphapapillomavirus	Alphapapillomavirus 10
	575072997	761	Viruses	no rank	Human papillomavirus type 6	31552	333754	1993-08-13 01:00:00	dsDNA viruses, no RNA stage				Viruses	Papillomaviridae	Alphapapillomavirus	Alphapapillomavirus 10
	575073007	744	Viruses	no rank	Human papillomavirus type 6	31552	333754	1993-08-13 01:00:00	dsDNA viruses, no RNA stage				Viruses	Papillomaviridae	Alphapapillomavirus	Alphapapillomavirus 10
	575073017	402	Viruses	no rank	Human papillomavirus type 6	31552	333754	1993-08-13 01:00:00	dsDNA viruses, no RNA stage				Viruses	Papillomaviridae	Alphapapillomavirus	Alphapapillomavirus 10
	575073027	404	Viruses	no rank	Human papillomavirus type 6	31552	333754	1993-08-13 01:00:00	dsDNA viruses, no RNA stage				Viruses	Papillomaviridae	Alphapapillomavirus	Alphapapillomavirus 10
	575073037	404	Viruses	no rank	Human papillomavirus type 6	31552	333754	1993-08-13 01:00:00	dsDNA viruses, no RNA stage				Viruses	Papillomaviridae	Alphapapillomavirus	Alphapapillomavirus 10
	575073047	404	Viruses	no rank	Human papillomavirus type 6	31552	333754	1993-08-13 01:00:00	dsDNA viruses, no RNA stage				Viruses	Papillomaviridae	Alphapapillomavirus	Alphapapillomavirus 10
	575073057	404	Viruses	no rank	Human papillomavirus type 6	31552	333754	1993-08-13 01:00:00	dsDNA viruses, no RNA stage				Viruses	Papillomaviridae	Alphapapillomavirus	Alphapapillomavirus 10
	575073067	404	Viruses	no rank	Human papillomavirus type 6	31552	333754	1993-08-13 01:00:00	dsDNA viruses, no RNA stage				Viruses	Papillomaviridae	Alphapapillomavirus	Alphapapillomavirus 10
	575073077	729	Viruses	no rank	Human papillomavirus type 6	31552	333754	1993-08-13 01:00:00	dsDNA viruses, no RNA stage				Viruses	Papillomaviridae	Alphapapillomavirus	Alphapapillomavirus 10
	575073087	729	Viruses	no rank	Human papillomavirus type 6	31552	333754	1993-08-13 01:00:00	dsDNA viruses, no RNA stage				Viruses	Papillomaviridae	Alphapapillomavirus	Alphapapillomavirus 10
	575073097	729	Viruses	no rank	Human papillomavirus type 6	31552	333754	1993-08-13 01:00:00	dsDNA viruses, no RNA stage				Viruses	Papillomaviridae	Alphapapillomavirus	Alphapapillomavirus 10
	575073107	730	Viruses	no rank	Human papillomavirus type 6	31552	333754	1993-08-13 01:00:00	dsDNA viruses, no RNA stage				Viruses	Papillomaviridae	Alphapapillomavirus	Alphapapillomavirus 10
	575073117	711	Viruses	no rank	Human papillomavirus type 6	31552	333754	1993-08-13 01:00:00	dsDNA viruses, no RNA stage				Viruses	Papillomaviridae	Alphapapillomavirus	Alphapapillomavirus 10
	575073127	729	Viruses	no rank	Human papillomavirus type 6	31552	333754	1993-08-13 01:00:00	dsDNA viruses, no RNA stage				Viruses	Papillomaviridae	Alphapapillomavirus	Alphapapillomavirus 10
	575073137	729	Viruses	no rank	Human papillomavirus type 6	31552	333754	1993-08-13 01:00:00	dsDNA viruses, no RNA stage				Viruses	Papillomaviridae	Alphapapillomavirus	Alphapapillomavirus 10
	575073146	732	Viruses	no rank	Human papillomavirus type 6	31552	333754	1993-08-13 01:00:00	dsDNA viruses, no RNA stage				Viruses	Papillomaviridae	Alphapapillomavirus	Alphapapillomavirus 10
	575073156	731	Viruses	no rank	Human papillomavirus type 6	31552	333754	1993-08-13 01:00:00	dsDNA viruses, no RNA stage				Viruses	Papillomaviridae	Alphapapillomavirus	Alphapapillomavirus 10
	575073166	744	Viruses	no rank	Human papillomavirus type 6	31552	333754	1993-08-13 01:00:00	dsDNA viruses, no RNA stage				Viruses	Papillomaviridae	Alphapapillomavirus	Alphapapillomavirus 10
	575073176	402	Viruses	no rank	Human papillomavirus type 6	31552	333754	1993-08-13 01:00:00	dsDNA viruses, no RNA stage				Viruses	Papillomaviridae	Alphapapillomavirus	Alphapapillomavirus 10
	575073186	729	Viruses	no rank	Human papillomavirus type 6	31552	333754	1993-08-13 01:00:00	dsDNA viruses, no RNA stage				Viruses	Papillomaviridae	Alphapapillomavirus	Alphapapillomavirus 10
	575073196	751	Viruses	no rank	Human papillomavirus type 6	31552	333754	1993-08-13 01:00:00	dsDNA viruses, no RNA stage				Viruses	Papillomaviridae	Alphapapillomavirus	Alphapapillomavirus 10
	575073206	730	Viruses	no rank	Human papillomavirus type 6	31552	333754	1993-08-13 01:00:00	dsDNA viruses, no RNA stage				Viruses	Papillomaviridae	Alphapapillomavirus	Alphapapillomavirus 10
	575073216	730	Viruses	no rank	Human papillomavirus type 6	31552	333754	1993-08-13 01:00:00	dsDNA viruses, no RNA stage				Viruses	Papillomaviridae	Alphapapillomavirus	Alphapapillomavirus 10
	575073226	712	Viruses	no rank	Human papillomavirus type 6	31552	333754	1993-08-13 01:00:00	dsDNA viruses, no RNA stage				Viruses	Papillomaviridae	Alphapapillomavirus	Alphapapillomavirus 10
	575073236	729	Viruses	no rank	Human papillomavirus type 6	31552	333754	1993-08-13 01:00:00	dsDNA viruses, no RNA stage				Viruses	Papillomaviridae	Alphapapillomavirus	Alphapapillomavirus 10
	575073246	729	Viruses	no rank	Human papillomavirus type 6	31552	333754	1993-08-13 01:00:00	dsDNA viruses, no RNA stage				Viruses	Papillomaviridae	Alphapapillomavirus	Alphapapillomavirus 10
	575073256	730	Viruses	no rank	Human papillomavirus type 6	31552	333754	1993-08-13 01:00:00	dsDNA viruses, no RNA stage				Viruses	Papillomaviridae	Alphapapillomavirus	Alphapapillomavirus 10
	575073266	732	Viruses	no rank	Human papillomavirus type 6	31552	333754	1993-08-13 01:00:00	dsDNA viruses, no RNA stage				Viruses	Papillomaviridae	Alphapapillomavirus	Alphapapillomavirus 10
	575073276	730	Viruses	no rank	Human papillomavirus type 6	31552	333754	1993-08-13 01:00:00	dsDNA viruses, no RNA stage				Viruses	Papillomaviridae	Alphapapillomavirus	Alphapapillomavirus 10
	575073286	731	Viruses	no rank	Human papillomavirus type 6	31552	333754	1993-08-13 01:00:00	dsDNA viruses, no RNA stage				Viruses	Papillomaviridae	Alphapapillomavirus	Alphapapillomavirus 10
	575073296	745	Viruses	no rank	Human papillomavirus type 6	31552	333754	1993-08-13 01:00:00	dsDNA viruses, no RNA stage				Viruses	Papillomaviridae	Alphapapillomavirus	Alphapapillomavirus 10
	575073306	744	Viruses	no rank	Human papillomavirus type 6	31552	333754	1993-08-13 01:00:00	dsDNA viruses, no RNA stage				Viruses	Papillomaviridae	Alphapapillomavirus	Alphapapillomavirus 10
	575073316	744	Viruses	no rank	Human papillomavirus type 6	31552	333754	1993-08-13 01:00:00	dsDNA viruses, no RNA stage				Viruses	Papillomaviridae	Alphapapillomavirus	Alphapapillomavirus 10
	575073326	404	Viruses	no rank	Human papillomavirus type 6	31552	333754	1993-08-13 01:00:00	dsDNA viruses, no RNA stage				Viruses	Papillomaviridae	Alphapapillomavirus	Alphapapillomavirus 10
	575073336	414	Viruses	no rank	Human papillomavirus type 6	31552	333754	1993-08-13 01:00:00	dsDNA viruses, no RNA stage				Viruses	Papillomaviridae	Alphapapillomavirus	Alphapapillomavirus 10
	575073346	711	Viruses	no rank	Human papillomavirus type 6	31552	333754	1993-08-13 01:00:00	dsDNA viruses, no RNA stage				Viruses	Papillomaviridae	Alphapapillomavirus	Alphapapillomavirus 10
	575073356	729	Viruses	no rank	Human papillomavirus type 6	31552	333754	1993-08-13 01:00:00	dsDNA viruses, no RNA stage				Viruses	Papillomaviridae	Alphapapillomavirus	Alphapapillomavirus 10
	575073366	738	Viruses	no rank	Human papillomavirus type 6	31552	333754	1993-08-13 01:00:00	dsDNA viruses, no RNA stage				Viruses	Papillomaviridae	Alphapapillomavirus	Alphapapillomavirus 10
	575073376	738	Viruses	no rank	Human papillomavirus type 6	31552	333754	1993-08-13 01:00:00	dsDNA viruses, no RNA stage				Viruses	Papillomaviridae	Alphapapillomavirus	Alphapapillomavirus 10
	575073386	738	Viruses	no rank	Human papillomavirus type 6	31552	333754	1993-08-13 01:00:00	dsDNA viruses, no RNA stage				Viruses	Papillomaviridae	Alphapapillomavirus	Alphapapillomavirus 10
	575073396	755	Viruses	no rank	Human papillomavirus type 6	31552	333754	1993-08-13 01:00:00	dsDNA viruses, no RNA stage				Viruses	Papillomaviridae	Alphapapillomavirus	Alphapapillomavirus 10
	575073406	739	Viruses	no rank	Human papillomavirus type 6	31552	333754	1993-08-13 01:00:00	dsDNA viruses, no RNA stage				Viruses	Papillomaviridae	Alphapapillomavirus	Alphapapillomavirus 10
	575073416	731	Viruses	no rank	Human papillomavirus type 6	31552	333754	1993-08-13 01:00:00	dsDNA viruses, no RNA stage				Viruses	Papillomaviridae	Alphapapillomavirus	Alphapapillomavirus 10
	575073426	744	Viruses	no rank	Human papillomavirus type 6	31552	333754	1993-08-13 01:00:00	dsDNA viruses, no RNA stage				Viruses	Papillomaviridae	Alphapapillomavirus	Alphapapillomavirus 10
	575073436	720	Viruses	no rank	Human papillomavirus type 6	31552	333754	1993-08-13 01:00:00	dsDNA viruses, no RNA stage				Viruses	Papillomaviridae	Alphapapillomavirus	Alphapapillomavirus 10
	575073446	745	Viruses	no rank	Human papillomavirus type 6	31552	333754	1993-08-13 01:00:00	dsDNA viruses, no RNA stage				Viruses	Papillomaviridae	Alphapapillomavirus	Alphapapillomavirus 10
	575073456	753	Viruses	no rank	Human papillomavirus type 6	31552	333754	1993-08-13 01:00:00	dsDNA viruses, no RNA stage				Viruses	Papillomaviridae	Alphapapillomavirus	Alphapapillomavirus 10
	575073466	744	Viruses	no rank	Human papillomavirus type 6	31552	333754	1993-08-13 01:00:00	dsDNA viruses, no RNA stage				Viruses	Papillomaviridae	Alphapapillomavirus	Alphapapillomavirus 10
	575073476	817	Viruses	no rank	Human papillomavirus type 6	31552	333754	1993-08-13 01:00:00	dsDNA viruses, no RNA stage				Viruses	Papillomaviridae	Alphapapillomavirus	Alphapapillomavirus 10
	575073486	817	Viruses	no rank	Human papillomavirus type 6	31552	333754	1993-08-13 01:00:00	dsDNA viruses, no RNA stage				Viruses	Papillomaviridae	Alphapapillomavirus	Alphapapillomavirus 10
	575073496	729	Viruses	no rank	Human papillomavirus type 6	31552	333754	1993-08-13 01:00:00	dsDNA viruses, no RNA stage				Viruses	Papillomaviridae	Alphapapillomavirus	Alphapapillomavirus 10
	575073506	731	Viruses	no rank	Human papillomavirus type 6	31552	333754	1993-08-13 01:00:00	dsDNA viruses, no RNA stage				Viruses	Papillomaviridae	Alphapapillomavirus	Alphapapillomavirus 10
	575073516	730	Viruses	no rank	Human papillomavirus type 6	31552	333754	1993-08-13 01:00:00	dsDNA viruses, no RNA stage				Viruses	Papillomaviridae	Alphapapillomavirus	Alphapapillomavirus 10
	575073526	730	Viruses	no rank	Human papillomavirus type 6	31552	333754	1993-08-13 01:00:00	dsDNA viruses, no RNA stage				Viruses	Papillomaviridae	Alphapapillomavirus	Alphapapillomavirus 10
	575073536	744	Viruses	no rank	Human papillomavirus type 6	31552	333754	1993-08-13 01:00:00	dsDNA viruses, no RNA stage				Viruses	Papillomaviridae	Alphapapillomavirus	Alphapapillomavirus 10
	575073546	738	Viruses	no rank	Human papillomavirus type 6	31552	333754	1993-08-13 01:00:00	dsDNA viruses, no RNA stage				Viruses	Papillomaviridae	Alphapapillomavirus	Alphapapillomavirus 10
	575073556	536	Viruses	no rank	Human papillomavirus type 6	31552	333754	1993-08-13 01:00:00	dsDNA viruses, no RNA stage				Viruses	Papillomaviridae	Alphapapillomavirus	Alphapapillomavirus 10
	575073566	727	Viruses	no rank	Human papillomavirus type 6	31552	333754	1993-08-13 01:00:00	dsDNA viruses, no RNA stage				Viruses	Papillomaviridae	Alphapapillomavirus	Alphapapillomavirus 10
	575073576	729	Viruses	no rank	Human papillomavirus type 6	31552	333754	1993-08-13 01:00:00	dsDNA viruses, no RNA stage				Viruses	Papillomaviridae	Alphapapillomavirus	Alphapapillomavirus 10
	575073586	729	Viruses	no rank	Human papillomavirus type 6	31552	333754	1993-08-13 01:00:00	dsDNA viruses, no RNA stage				Viruses	Papillomaviridae	Alphapapillomavirus	Alphapapillomavirus 10
	575073596	711	Viruses	no rank	Human papillomavirus type 6	31552	333754	1993-08-13 01:00:00	dsDNA viruses, no RNA stage				Viruses	Papillomaviridae	Alphapapillomavirus	Alphapapillomavirus 10
	575073606	721	Viruses	no rank	Human papillomavirus type 6	31552	333754	1993-08-13 01:00:00	dsDNA viruses, no RNA stage				Viruses	Papillomaviridae	Alphapapillomavirus	Alphapapillomavirus 10
	575073616	729	Viruses	no rank	Human papillomavirus type 6	31552	333754	1993-08-13 01:00:00	dsDNA viruses, no RNA stage				Viruses	Papillomaviridae	Alphapapillomavirus	Alphapapillomavirus 10
	575073626	731	Viruses	no rank	Human papillomavirus type 6	31552	333754	1993-08-13 01:00:00	dsDNA viruses, no RNA stage				Viruses	Papillomaviridae	Alphapapillomavirus	Alphapapillomavirus 10
	575073636	730	Viruses	no rank	Human papillomavirus type 6	31552	333754	1993-08-13 01:00:00	dsDNA viruses, no RNA stage				Viruses	Papillomaviridae	Alphapapillomavirus	Alphapapillomavirus 10
	575073646	739	Viruses	no rank	Human papillomavirus type 6	31552	333754	1993-08-13 01:00:00	dsDNA viruses, no RNA stage				Viruses	Papillomaviridae	Alphapapillomavirus	Alphapapillomavirus 10
	575073656	732	Viruses	no rank	Human papillomavirus type 6	31552	333754	1993-08-13 01:00:00	dsDNA viruses, no RNA stage				Viruses	Papillomaviridae	Alphapapillomavirus	Alphapapillomavirus 10
	575073666	730	Viruses	no rank	Human papillomavirus type 6	31552	333754	1993-08-13 01:00:00	dsDNA viruses, no RNA stage				Viruses	Papillomaviridae	Alphapapillomavirus	Alphapapillomavirus 10
	575073676	746	Viruses	no rank	Human papillomavirus type 6	31552	333754	1993-08-13 01:00:00	dsDNA viruses, no RNA stage				Viruses	Papillomaviridae	Alphapapillomavirus	Alphapapillomavirus 10
	575073686	744	Viruses	no rank	Human papillomavirus type 6	31552	333754	1993-08-13 01:00:00	dsDNA viruses, no RNA stage				Viruses	Papillomaviridae	Alphapapillomavirus	Alphapapillomavirus 10
	575073696	416	Viruses	no rank	Human papillomavirus type 6	31552	333754	1993-08-13 01:00:00	dsDNA viruses, no RNA stage				Viruses	Papillomaviridae	Alphapapillomavirus	Alphapapillomavirus 10
	575073706	404	Viruses	no rank	Human papillomavirus type 6	31552	333754	1993-08-13 01:00:00	dsDNA viruses, no RNA stage				Viruses	Papillomaviridae	Alphapapillomavirus	Alphapapillomavirus 10
	575073716	727	Viruses	no rank	Human papillomavirus type 6	31552	333754	1993-08-13 01:00:00	dsDNA viruses, no RNA stage				Viruses	Papillomaviridae	Alphapapillomavirus	Alphapapillomavirus 10
	575073726	729	Viruses	no rank	Human papillomavirus type 6	31552	333754	1993-08-13 01:00:00	dsDNA viruses, no RNA stage				Viruses	Papillomaviridae	Alphapapillomavirus	Alphapapillomavirus 10
	575073736	729	Viruses	no rank	Human papillomavirus type 6	31552	333754	1993-08-13 01:00:00	dsDNA viruses, no RNA stage				Viruses	Papillomaviridae	Alphapapillomavirus	Alphapapillomavirus 10
	575073746	729	Viruses	no rank	Human papillomavirus type 6	31552	333754	1993-08-13 01:00:00	dsDNA viruses, no RNA stage				Viruses	Papillomaviridae	Alphapapillomavirus	Alphapapillomavirus 10
	575073756	730	Viruses	no rank	Human papillomavirus type 6	31552	333754	1993-08-13 01:00:00	dsDNA viruses, no RNA stage				Viruses	Papillomaviridae	Alphapapillomavirus	Alphapapillomavirus 10
	575073766	740	Viruses	no rank	Human papillomavirus type 6	31552	333754	1993-08-13 01:00:00	dsDNA viruses, no RNA stage				Viruses	Papillomaviridae	Alphapapillomavirus	Alphapapillomavirus 10
	575073776	744	Viruses	no rank	Human papillomavirus type 6	31552	333754	1993-08-13 01:00:00	dsDNA viruses, no RNA stage				Viruses	Papillomaviridae	Alphapapillomavirus	Alphapapillomavirus 10
	575073786	744	Viruses	no rank	Human papillomavirus type 6	31552	333754	1993-08-13 01:00:00	dsDNA viruses, no RNA stage				Viruses	Papillomaviridae	Alphapapillomavirus	Alphapapillomavirus 10
	575073796	744	Viruses	no rank	Human papillomavirus type 6	31552	333754	1993-08-13 01:00:00	dsDNA viruses, no RNA stage				Viruses	Papillomaviridae	Alphapapillomavirus	Alphapapillomavirus 10
	575073806	730	Viruses	no rank	Human papillomavirus type 6	31552	333754	1993-08-13 01:00:00	dsDNA viruses, no RNA stage				Viruses	Papillomaviridae	Alphapapillomavirus	Alphapapillomavirus 10
	575073816	729	Viruses	no rank	Human papillomavirus type 6	31552	333754	1993-08-13 01:00:00	dsDNA viruses, no RNA stage				Viruses	Papillomaviridae	Alphapapillomavirus	Alphapapillomavirus 10
	575073826	729	Viruses	no rank	Human papillomavirus type 6	31552	333754	1993-08-13 01:00:00	dsDNA viruses, no RNA stage				Viruses	Papillomaviridae	Alphapapillomavirus	Alphapapillomavirus 10
	575073836	711	Viruses	no rank	Human papillomavirus type 6	31552	333754	1993-08-13 01:00:00	dsDNA viruses, no RNA stage				Viruses	Papillomaviridae	Alphapapillomavirus	Alphapapillomavirus 10
	575073846	756	Viruses	no rank	Human papillomavirus type 6	31552	333754	1993-08-13 01:00:00	dsDNA viruses, no RNA stage				Viruses	Papillomaviridae	Alphapapillomavirus	Alphapapillomavirus 10
	575073856	711	Viruses	no rank	Human papillomavirus type 6	31552	333754	1993-08-13 01:00:00	dsDNA viruses, no RNA stage				Viruses	Papillomaviridae	Alphapapillomavirus	Alphapapillomavirus 10
	575073866	751	Viruses	no rank	Human papillomavirus type 6	31552	333754	1993-08-13 01:00:00	dsDNA viruses, no RNA stage				Viruses	Papillomaviridae	Alphapapillomavirus	Alphapapillomavirus 10
	60851	717	Viruses	species	BK polyomavirus	10629	10624	1993-04-23 01:00:00	dsDNA viruses, no RNA stage				Viruses	Polyomaviridae	Polyomavirus
	332759	249	Viruses	no rank	Murine polyomavirus strain A3	157703	10634	2001-04-17 18:00:00	dsDNA viruses, no RNA stage				Viruses	Polyomaviridae	Polyomavirus	Murine polyomavirus
	332774	1602	Viruses	species	BK polyomavirus	10629	10624	1993-04-23 01:00:00	dsDNA viruses, no RNA stage				Viruses	Polyomaviridae	Polyomavirus
	332788	537	Viruses	no rank	Mouse polyomavirus (strain Crawford small-plaque)	10637	10634	1993-04-23 01:00:00	dsDNA viruses, no RNA stage				Viruses	Polyomaviridae	Polyomavirus	Murine polyomavirus
	333282	497	Viruses	no rank	Monkey B-lymphotropic papovavirus	10574	12480	1993-08-03 01:00:00	dsDNA viruses, no RNA stage				Viruses	Polyomaviridae	Polyomavirus	African green monkey polyomavirus
	915348	506	Viruses	species	Murine polyomavirus	10634	10624	1993-04-23 01:00:00	dsDNA viruses, no RNA stage				Viruses	Polyomaviridae	Polyomavirus
	915355	457	Viruses	species	Murine polyomavirus	10634	10624	1993-04-23 01:00:00	dsDNA viruses, no RNA stage				Viruses	Polyomaviridae	Polyomavirus
	1438955	265	Viruses	species	JC polyomavirus	10632	10624	1993-08-02 01:00:00	dsDNA viruses, no RNA stage				Viruses	Polyomaviridae	Polyomavirus
	1813573	265	Viruses	species	JC polyomavirus	10632	10624	1993-08-02 01:00:00	dsDNA viruses, no RNA stage				Viruses	Polyomaviridae	Polyomavirus
	1813580	276	Viruses	species	JC polyomavirus	10632	10624	1993-08-02 01:00:00	dsDNA viruses, no RNA stage				Viruses	Polyomaviridae	Polyomavirus
	1813587	276	Viruses	species	JC polyomavirus	10632	10624	1993-08-02 01:00:00	dsDNA viruses, no RNA stage				Viruses	Polyomaviridae	Polyomavirus
	2246606	358	Viruses	species	JC polyomavirus	10632	10624	1993-08-02 01:00:00	dsDNA viruses, no RNA stage				Viruses	Polyomaviridae	Polyomavirus
	2246613	456	Viruses	species	JC polyomavirus	10632	10624	1993-08-02 01:00:00	dsDNA viruses, no RNA stage				Viruses	Polyomaviridae	Polyomavirus
	2724088	174	Viruses	species	Simian virus 40	10633	10624	1993-08-03 01:00:00	dsDNA viruses, no RNA stage				Viruses	Polyomaviridae	Polyomavirus
	3098269	236	Viruses	species	JC polyomavirus	10632	10624	1993-08-02 01:00:00	dsDNA viruses, no RNA stage				Viruses	Polyomaviridae	Polyomavirus
	5053089	343	Viruses	species	Simian virus 40	10633	10624	1993-08-03 01:00:00	dsDNA viruses, no RNA stage				Viruses	Polyomaviridae	Polyomavirus
	5059399	173	Viruses	species	Simian virus 40	10633	10624	1993-08-03 01:00:00	dsDNA viruses, no RNA stage				Viruses	Polyomaviridae	Polyomavirus
	5059411	166	Viruses	species	Simian virus 40	10633	10624	1993-08-03 01:00:00	dsDNA viruses, no RNA stage				Viruses	Polyomaviridae	Polyomavirus
	5457120	299	Viruses	species	Simian virus 40	10633	10624	1993-08-03 01:00:00	dsDNA viruses, no RNA stage				Viruses	Polyomaviridae	Polyomavirus
	5457127	166	Viruses	species	Simian virus 40	10633	10624	1993-08-03 01:00:00	dsDNA viruses, no RNA stage				Viruses	Polyomaviridae	Polyomavirus
	6760242	184	Viruses	species	Simian virus 40	10633	10624	1993-08-03 01:00:00	dsDNA viruses, no RNA stage				Viruses	Polyomaviridae	Polyomavirus
	9626482	4697	Viruses	species	Bovine polyomavirus	10627	10624	1993-08-02 01:00:00	dsDNA viruses, no RNA stage				Viruses	Polyomaviridae	Polyomavirus
	9627020	5297	Viruses	species	Murine polyomavirus	10634	10624	1993-04-23 01:00:00	dsDNA viruses, no RNA stage				Viruses	Polyomaviridae	Polyomavirus
	9627180	5153	Viruses	species	BK polyomavirus	10629	10624	1993-04-23 01:00:00	dsDNA viruses, no RNA stage				Viruses	Polyomaviridae	Polyomavirus
	9628283	5366	Viruses	species	Hamster polyomavirus	10626	10624	1993-04-29 01:00:00	dsDNA viruses, no RNA stage				Viruses	Polyomaviridae	Polyomavirus
	9628421	5243	Viruses	species	Simian virus 40	10633	10624	1993-08-03 01:00:00	dsDNA viruses, no RNA stage				Viruses	Polyomaviridae	Polyomavirus
	9628642	5130	Viruses	species	JC polyomavirus	10632	10624	1993-08-02 01:00:00	dsDNA viruses, no RNA stage				Viruses	Polyomaviridae	Polyomavirus
	9796397	265	Viruses	species	JC polyomavirus	10632	10624	1993-08-02 01:00:00	dsDNA viruses, no RNA stage				Viruses	Polyomaviridae	Polyomavirus
	9796404	264	Viruses	species	JC polyomavirus	10632	10624	1993-08-02 01:00:00	dsDNA viruses, no RNA stage				Viruses	Polyomaviridae	Polyomavirus
	9796411	264	Viruses	species	JC polyomavirus	10632	10624	1993-08-02 01:00:00	dsDNA viruses, no RNA stage				Viruses	Polyomaviridae	Polyomavirus
	9796418	255	Viruses	species	JC polyomavirus	10632	10624	1993-08-02 01:00:00	dsDNA viruses, no RNA stage				Viruses	Polyomaviridae	Polyomavirus
	9796425	265	Viruses	species	JC polyomavirus	10632	10624	1993-08-02 01:00:00	dsDNA viruses, no RNA stage				Viruses	Polyomaviridae	Polyomavirus
	9796432	497	Viruses	species	JC polyomavirus	10632	10624	1993-08-02 01:00:00	dsDNA viruses, no RNA stage				Viruses	Polyomaviridae	Polyomavirus
	9796439	244	Viruses	species	JC polyomavirus	10632	10624	1993-08-02 01:00:00	dsDNA viruses, no RNA stage				Viruses	Polyomaviridae	Polyomavirus
	11612147	166	Viruses	species	Simian virus 40	10633	10624	1993-08-03 01:00:00	dsDNA viruses, no RNA stage				Viruses	Polyomaviridae	Polyomavirus
	12698883	342	Viruses	species	Simian virus 40	10633	10624	1993-08-03 01:00:00	dsDNA viruses, no RNA stage				Viruses	Polyomaviridae	Polyomavirus
	13345942	166	Viruses	species	Simian virus 40	10633	10624	1993-08-03 01:00:00	dsDNA viruses, no RNA stage				Viruses	Polyomaviridae	Polyomavirus
	13517906	346	Viruses	species	Simian virus 40	10633	10624	1993-08-03 01:00:00	dsDNA viruses, no RNA stage				Viruses	Polyomaviridae	Polyomavirus
	13517913	350	Viruses	species	Simian virus 40	10633	10624	1993-08-03 01:00:00	dsDNA viruses, no RNA stage				Viruses	Polyomaviridae	Polyomavirus
	14586696	215	Viruses	species	JC polyomavirus	10632	10624	1993-08-02 01:00:00	dsDNA viruses, no RNA stage				Viruses	Polyomaviridae	Polyomavirus
	14586703	105	Viruses	species	JC polyomavirus	10632	10624	1993-08-02 01:00:00	dsDNA viruses, no RNA stage				Viruses	Polyomaviridae	Polyomavirus
	15428853	361	Viruses	species	JC polyomavirus	10632	10624	1993-08-02 01:00:00	dsDNA viruses, no RNA stage				Viruses	Polyomaviridae	Polyomavirus
	15428860	361	Viruses	species	JC polyomavirus	10632	10624	1993-08-02 01:00:00	dsDNA viruses, no RNA stage				Viruses	Polyomaviridae	Polyomavirus
	15428867	361	Viruses	species	JC polyomavirus	10632	10624	1993-08-02 01:00:00	dsDNA viruses, no RNA stage				Viruses	Polyomaviridae	Polyomavirus
	15428874	361	Viruses	species	JC polyomavirus	10632	10624	1993-08-02 01:00:00	dsDNA viruses, no RNA stage				Viruses	Polyomaviridae	Polyomavirus
	15428881	361	Viruses	species	JC polyomavirus	10632	10624	1993-08-02 01:00:00	dsDNA viruses, no RNA stage				Viruses	Polyomaviridae	Polyomavirus
	15428888	361	Viruses	species	JC polyomavirus	10632	10624	1993-08-02 01:00:00	dsDNA viruses, no RNA stage				Viruses	Polyomaviridae	Polyomavirus
	15428895	361	Viruses	species	JC polyomavirus	10632	10624	1993-08-02 01:00:00	dsDNA viruses, no RNA stage				Viruses	Polyomaviridae	Polyomavirus
	15428902	351	Viruses	species	JC polyomavirus	10632	10624	1993-08-02 01:00:00	dsDNA viruses, no RNA stage				Viruses	Polyomaviridae	Polyomavirus
	15428909	351	Viruses	species	JC polyomavirus	10632	10624	1993-08-02 01:00:00	dsDNA viruses, no RNA stage				Viruses	Polyomaviridae	Polyomavirus
	15428916	351	Viruses	species	JC polyomavirus	10632	10624	1993-08-02 01:00:00	dsDNA viruses, no RNA stage				Viruses	Polyomaviridae	Polyomavirus
	15428923	351	Viruses	species	JC polyomavirus	10632	10624	1993-08-02 01:00:00	dsDNA viruses, no RNA stage				Viruses	Polyomaviridae	Polyomavirus
	15428930	361	Viruses	species	JC polyomavirus	10632	10624	1993-08-02 01:00:00	dsDNA viruses, no RNA stage				Viruses	Polyomaviridae	Polyomavirus
	15428937	361	Viruses	species	JC polyomavirus	10632	10624	1993-08-02 01:00:00	dsDNA viruses, no RNA stage				Viruses	Polyomaviridae	Polyomavirus
	15428944	363	Viruses	species	JC polyomavirus	10632	10624	1993-08-02 01:00:00	dsDNA viruses, no RNA stage				Viruses	Polyomaviridae	Polyomavirus
	15428951	361	Viruses	species	JC polyomavirus	10632	10624	1993-08-02 01:00:00	dsDNA viruses, no RNA stage				Viruses	Polyomaviridae	Polyomavirus
	15428958	351	Viruses	species	JC polyomavirus	10632	10624	1993-08-02 01:00:00	dsDNA viruses, no RNA stage				Viruses	Polyomaviridae	Polyomavirus
	15428965	351	Viruses	species	JC polyomavirus	10632	10624	1993-08-02 01:00:00	dsDNA viruses, no RNA stage				Viruses	Polyomaviridae	Polyomavirus
	15428972	351	Viruses	species	JC polyomavirus	10632	10624	1993-08-02 01:00:00	dsDNA viruses, no RNA stage				Viruses	Polyomaviridae	Polyomavirus
	15428979	351	Viruses	species	JC polyomavirus	10632	10624	1993-08-02 01:00:00	dsDNA viruses, no RNA stage				Viruses	Polyomaviridae	Polyomavirus
	15428986	351	Viruses	species	JC polyomavirus	10632	10624	1993-08-02 01:00:00	dsDNA viruses, no RNA stage				Viruses	Polyomaviridae	Polyomavirus
	15428993	355	Viruses	species	JC polyomavirus	10632	10624	1993-08-02 01:00:00	dsDNA viruses, no RNA stage				Viruses	Polyomaviridae	Polyomavirus
	15429000	361	Viruses	species	JC polyomavirus	10632	10624	1993-08-02 01:00:00	dsDNA viruses, no RNA stage				Viruses	Polyomaviridae	Polyomavirus
	15429007	361	Viruses	species	JC polyomavirus	10632	10624	1993-08-02 01:00:00	dsDNA viruses, no RNA stage				Viruses	Polyomaviridae	Polyomavirus
	15823305	265	Viruses	species	JC polyomavirus	10632	10624	1993-08-02 01:00:00	dsDNA viruses, no RNA stage				Viruses	Polyomaviridae	Polyomavirus
	15823312	265	Viruses	species	JC polyomavirus	10632	10624	1993-08-02 01:00:00	dsDNA viruses, no RNA stage				Viruses	Polyomaviridae	Polyomavirus
	15823319	265	Viruses	species	JC polyomavirus	10632	10624	1993-08-02 01:00:00	dsDNA viruses, no RNA stage				Viruses	Polyomaviridae	Polyomavirus
	15823326	255	Viruses	species	JC polyomavirus	10632	10624	1993-08-02 01:00:00	dsDNA viruses, no RNA stage				Viruses	Polyomaviridae	Polyomavirus
	15823333	265	Viruses	species	JC polyomavirus	10632	10624	1993-08-02 01:00:00	dsDNA viruses, no RNA stage				Viruses	Polyomaviridae	Polyomavirus
	15823340	265	Viruses	species	JC polyomavirus	10632	10624	1993-08-02 01:00:00	dsDNA viruses, no RNA stage				Viruses	Polyomaviridae	Polyomavirus
	15823347	265	Viruses	species	JC polyomavirus	10632	10624	1993-08-02 01:00:00	dsDNA viruses, no RNA stage				Viruses	Polyomaviridae	Polyomavirus
	15823354	265	Viruses	species	JC polyomavirus	10632	10624	1993-08-02 01:00:00	dsDNA viruses, no RNA stage				Viruses	Polyomaviridae	Polyomavirus
	15823361	265	Viruses	species	JC polyomavirus	10632	10624	1993-08-02 01:00:00	dsDNA viruses, no RNA stage				Viruses	Polyomaviridae	Polyomavirus
	15823368	264	Viruses	species	JC polyomavirus	10632	10624	1993-08-02 01:00:00	dsDNA viruses, no RNA stage				Viruses	Polyomaviridae	Polyomavirus
	15823375	265	Viruses	species	JC polyomavirus	10632	10624	1993-08-02 01:00:00	dsDNA viruses, no RNA stage				Viruses	Polyomaviridae	Polyomavirus
	15823382	265	Viruses	species	JC polyomavirus	10632	10624	1993-08-02 01:00:00	dsDNA viruses, no RNA stage				Viruses	Polyomaviridae	Polyomavirus
	15823389	265	Viruses	species	JC polyomavirus	10632	10624	1993-08-02 01:00:00	dsDNA viruses, no RNA stage				Viruses	Polyomaviridae	Polyomavirus
	15823396	265	Viruses	species	JC polyomavirus	10632	10624	1993-08-02 01:00:00	dsDNA viruses, no RNA stage				Viruses	Polyomaviridae	Polyomavirus
	15823403	265	Viruses	species	JC polyomavirus	10632	10624	1993-08-02 01:00:00	dsDNA viruses, no RNA stage				Viruses	Polyomaviridae	Polyomavirus
	15823410	265	Viruses	species	JC polyomavirus	10632	10624	1993-08-02 01:00:00	dsDNA viruses, no RNA stage				Viruses	Polyomaviridae	Polyomavirus
	15823417	265	Viruses	species	JC polyomavirus	10632	10624	1993-08-02 01:00:00	dsDNA viruses, no RNA stage				Viruses	Polyomaviridae	Polyomavirus
	15823424	265	Viruses	species	JC polyomavirus	10632	10624	1993-08-02 01:00:00	dsDNA viruses, no RNA stage				Viruses	Polyomaviridae	Polyomavirus
	15823431	264	Viruses	species	JC polyomavirus	10632	10624	1993-08-02 01:00:00	dsDNA viruses, no RNA stage				Viruses	Polyomaviridae	Polyomavirus
	15823438	264	Viruses	species	JC polyomavirus	10632	10624	1993-08-02 01:00:00	dsDNA viruses, no RNA stage				Viruses	Polyomaviridae	Polyomavirus
	15823445	264	Viruses	species	JC polyomavirus	10632	10624	1993-08-02 01:00:00	dsDNA viruses, no RNA stage				Viruses	Polyomaviridae	Polyomavirus
	15823452	264	Viruses	species	JC polyomavirus	10632	10624	1993-08-02 01:00:00	dsDNA viruses, no RNA stage				Viruses	Polyomaviridae	Polyomavirus
	15823459	264	Viruses	species	JC polyomavirus	10632	10624	1993-08-02 01:00:00	dsDNA viruses, no RNA stage				Viruses	Polyomaviridae	Polyomavirus
	15823466	264	Viruses	species	JC polyomavirus	10632	10624	1993-08-02 01:00:00	dsDNA viruses, no RNA stage				Viruses	Polyomaviridae	Polyomavirus
	15823473	264	Viruses	species	JC polyomavirus	10632	10624	1993-08-02 01:00:00	dsDNA viruses, no RNA stage				Viruses	Polyomaviridae	Polyomavirus
	15823480	264	Viruses	species	JC polyomavirus	10632	10624	1993-08-02 01:00:00	dsDNA viruses, no RNA stage				Viruses	Polyomaviridae	Polyomavirus
	15823487	264	Viruses	species	JC polyomavirus	10632	10624	1993-08-02 01:00:00	dsDNA viruses, no RNA stage				Viruses	Polyomaviridae	Polyomavirus
	15823494	264	Viruses	species	JC polyomavirus	10632	10624	1993-08-02 01:00:00	dsDNA viruses, no RNA stage				Viruses	Polyomaviridae	Polyomavirus
	15823501	264	Viruses	species	JC polyomavirus	10632	10624	1993-08-02 01:00:00	dsDNA viruses, no RNA stage				Viruses	Polyomaviridae	Polyomavirus
	15823508	264	Viruses	species	JC polyomavirus	10632	10624	1993-08-02 01:00:00	dsDNA viruses, no RNA stage				Viruses	Polyomaviridae	Polyomavirus
	15823515	286	Viruses	species	JC polyomavirus	10632	10624	1993-08-02 01:00:00	dsDNA viruses, no RNA stage				Viruses	Polyomaviridae	Polyomavirus
	15823522	264	Viruses	species	JC polyomavirus	10632	10624	1993-08-02 01:00:00	dsDNA viruses, no RNA stage				Viruses	Polyomaviridae	Polyomavirus
	15823529	264	Viruses	species	JC polyomavirus	10632	10624	1993-08-02 01:00:00	dsDNA viruses, no RNA stage				Viruses	Polyomaviridae	Polyomavirus
	15823536	264	Viruses	species	JC polyomavirus	10632	10624	1993-08-02 01:00:00	dsDNA viruses, no RNA stage				Viruses	Polyomaviridae	Polyomavirus
	15823543	265	Viruses	species	JC polyomavirus	10632	10624	1993-08-02 01:00:00	dsDNA viruses, no RNA stage				Viruses	Polyomaviridae	Polyomavirus
	15823550	265	Viruses	species	JC polyomavirus	10632	10624	1993-08-02 01:00:00	dsDNA viruses, no RNA stage				Viruses	Polyomaviridae	Polyomavirus
	15823557	265	Viruses	species	JC polyomavirus	10632	10624	1993-08-02 01:00:00	dsDNA viruses, no RNA stage				Viruses	Polyomaviridae	Polyomavirus
	15823564	265	Viruses	species	JC polyomavirus	10632	10624	1993-08-02 01:00:00	dsDNA viruses, no RNA stage				Viruses	Polyomaviridae	Polyomavirus
	17105224	217	Viruses	no rank	Murine polyomavirus strain BG	179241	10634	2001-11-28 18:01:00	dsDNA viruses, no RNA stage				Viruses	Polyomaviridae	Polyomavirus	Murine polyomavirus
	21068896	264	Viruses	species	JC polyomavirus	10632	10624	1993-08-02 01:00:00	dsDNA viruses, no RNA stage				Viruses	Polyomaviridae	Polyomavirus
	21068903	299	Viruses	species	JC polyomavirus	10632	10624	1993-08-02 01:00:00	dsDNA viruses, no RNA stage				Viruses	Polyomaviridae	Polyomavirus
	21068910	264	Viruses	species	JC polyomavirus	10632	10624	1993-08-02 01:00:00	dsDNA viruses, no RNA stage				Viruses	Polyomaviridae	Polyomavirus
	21068917	264	Viruses	species	JC polyomavirus	10632	10624	1993-08-02 01:00:00	dsDNA viruses, no RNA stage				Viruses	Polyomaviridae	Polyomavirus
	21068924	264	Viruses	species	JC polyomavirus	10632	10624	1993-08-02 01:00:00	dsDNA viruses, no RNA stage				Viruses	Polyomaviridae	Polyomavirus
	21068931	264	Viruses	species	JC polyomavirus	10632	10624	1993-08-02 01:00:00	dsDNA viruses, no RNA stage				Viruses	Polyomaviridae	Polyomavirus
	21068938	264	Viruses	species	JC polyomavirus	10632	10624	1993-08-02 01:00:00	dsDNA viruses, no RNA stage				Viruses	Polyomaviridae	Polyomavirus
	21068945	264	Viruses	species	JC polyomavirus	10632	10624	1993-08-02 01:00:00	dsDNA viruses, no RNA stage				Viruses	Polyomaviridae	Polyomavirus
	21068952	262	Viruses	species	JC polyomavirus	10632	10624	1993-08-02 01:00:00	dsDNA viruses, no RNA stage				Viruses	Polyomaviridae	Polyomavirus
	21068959	237	Viruses	species	JC polyomavirus	10632	10624	1993-08-02 01:00:00	dsDNA viruses, no RNA stage				Viruses	Polyomaviridae	Polyomavirus
	21068966	264	Viruses	species	JC polyomavirus	10632	10624	1993-08-02 01:00:00	dsDNA viruses, no RNA stage				Viruses	Polyomaviridae	Polyomavirus
	21068973	264	Viruses	species	JC polyomavirus	10632	10624	1993-08-02 01:00:00	dsDNA viruses, no RNA stage				Viruses	Polyomaviridae	Polyomavirus
	21068980	264	Viruses	species	JC polyomavirus	10632	10624	1993-08-02 01:00:00	dsDNA viruses, no RNA stage				Viruses	Polyomaviridae	Polyomavirus
	21068987	282	Viruses	species	JC polyomavirus	10632	10624	1993-08-02 01:00:00	dsDNA viruses, no RNA stage				Viruses	Polyomaviridae	Polyomavirus
	21068994	264	Viruses	species	JC polyomavirus	10632	10624	1993-08-02 01:00:00	dsDNA viruses, no RNA stage				Viruses	Polyomaviridae	Polyomavirus
	21069001	247	Viruses	species	JC polyomavirus	10632	10624	1993-08-02 01:00:00	dsDNA viruses, no RNA stage				Viruses	Polyomaviridae	Polyomavirus
	21069008	264	Viruses	species	JC polyomavirus	10632	10624	1993-08-02 01:00:00	dsDNA viruses, no RNA stage				Viruses	Polyomaviridae	Polyomavirus
	21635338	104	Viruses	species	JC polyomavirus	10632	10624	1993-08-02 01:00:00	dsDNA viruses, no RNA stage				Viruses	Polyomaviridae	Polyomavirus
	21727916	265	Viruses	species	JC polyomavirus	10632	10624	1993-08-02 01:00:00	dsDNA viruses, no RNA stage				Viruses	Polyomaviridae	Polyomavirus
	21727923	265	Viruses	species	JC polyomavirus	10632	10624	1993-08-02 01:00:00	dsDNA viruses, no RNA stage				Viruses	Polyomaviridae	Polyomavirus
	21727930	265	Viruses	species	JC polyomavirus	10632	10624	1993-08-02 01:00:00	dsDNA viruses, no RNA stage				Viruses	Polyomaviridae	Polyomavirus
	21727937	265	Viruses	species	JC polyomavirus	10632	10624	1993-08-02 01:00:00	dsDNA viruses, no RNA stage				Viruses	Polyomaviridae	Polyomavirus
	21727944	265	Viruses	species	JC polyomavirus	10632	10624	1993-08-02 01:00:00	dsDNA viruses, no RNA stage				Viruses	Polyomaviridae	Polyomavirus
	21727951	265	Viruses	species	JC polyomavirus	10632	10624	1993-08-02 01:00:00	dsDNA viruses, no RNA stage				Viruses	Polyomaviridae	Polyomavirus
	21727958	265	Viruses	species	JC polyomavirus	10632	10624	1993-08-02 01:00:00	dsDNA viruses, no RNA stage				Viruses	Polyomaviridae	Polyomavirus
	21727965	265	Viruses	species	JC polyomavirus	10632	10624	1993-08-02 01:00:00	dsDNA viruses, no RNA stage				Viruses	Polyomaviridae	Polyomavirus
	21727972	265	Viruses	species	JC polyomavirus	10632	10624	1993-08-02 01:00:00	dsDNA viruses, no RNA stage				Viruses	Polyomaviridae	Polyomavirus
	21727979	265	Viruses	species	JC polyomavirus	10632	10624	1993-08-02 01:00:00	dsDNA viruses, no RNA stage				Viruses	Polyomaviridae	Polyomavirus
	21727986	265	Viruses	species	JC polyomavirus	10632	10624	1993-08-02 01:00:00	dsDNA viruses, no RNA stage				Viruses	Polyomaviridae	Polyomavirus
	21727993	265	Viruses	species	JC polyomavirus	10632	10624	1993-08-02 01:00:00	dsDNA viruses, no RNA stage				Viruses	Polyomaviridae	Polyomavirus
	21728000	265	Viruses	species	JC polyomavirus	10632	10624	1993-08-02 01:00:00	dsDNA viruses, no RNA stage				Viruses	Polyomaviridae	Polyomavirus
	21728007	265	Viruses	species	JC polyomavirus	10632	10624	1993-08-02 01:00:00	dsDNA viruses, no RNA stage				Viruses	Polyomaviridae	Polyomavirus
	21728014	265	Viruses	species	JC polyomavirus	10632	10624	1993-08-02 01:00:00	dsDNA viruses, no RNA stage				Viruses	Polyomaviridae	Polyomavirus
	21728021	265	Viruses	species	JC polyomavirus	10632	10624	1993-08-02 01:00:00	dsDNA viruses, no RNA stage				Viruses	Polyomaviridae	Polyomavirus
	21728028	326	Viruses	species	JC polyomavirus	10632	10624	1993-08-02 01:00:00	dsDNA viruses, no RNA stage				Viruses	Polyomaviridae	Polyomavirus
	21728035	265	Viruses	species	JC polyomavirus	10632	10624	1993-08-02 01:00:00	dsDNA viruses, no RNA stage				Viruses	Polyomaviridae	Polyomavirus
	21728042	265	Viruses	species	JC polyomavirus	10632	10624	1993-08-02 01:00:00	dsDNA viruses, no RNA stage				Viruses	Polyomaviridae	Polyomavirus
	21728049	265	Viruses	species	JC polyomavirus	10632	10624	1993-08-02 01:00:00	dsDNA viruses, no RNA stage				Viruses	Polyomaviridae	Polyomavirus
	21728056	265	Viruses	species	JC polyomavirus	10632	10624	1993-08-02 01:00:00	dsDNA viruses, no RNA stage				Viruses	Polyomaviridae	Polyomavirus
	21728063	265	Viruses	species	JC polyomavirus	10632	10624	1993-08-02 01:00:00	dsDNA viruses, no RNA stage				Viruses	Polyomaviridae	Polyomavirus
	21728070	265	Viruses	species	JC polyomavirus	10632	10624	1993-08-02 01:00:00	dsDNA viruses, no RNA stage				Viruses	Polyomaviridae	Polyomavirus
	21728077	265	Viruses	species	JC polyomavirus	10632	10624	1993-08-02 01:00:00	dsDNA viruses, no RNA stage				Viruses	Polyomaviridae	Polyomavirus
	21728084	265	Viruses	species	JC polyomavirus	10632	10624	1993-08-02 01:00:00	dsDNA viruses, no RNA stage				Viruses	Polyomaviridae	Polyomavirus
	21950752	166	Viruses	species	Simian virus 40	10633	10624	1993-08-03 01:00:00	dsDNA viruses, no RNA stage				Viruses	Polyomaviridae	Polyomavirus
	22830610	265	Viruses	species	JC polyomavirus	10632	10624	1993-08-02 01:00:00	dsDNA viruses, no RNA stage				Viruses	Polyomaviridae	Polyomavirus
	22830617	264	Viruses	species	JC polyomavirus	10632	10624	1993-08-02 01:00:00	dsDNA viruses, no RNA stage				Viruses	Polyomaviridae	Polyomavirus
	22830624	265	Viruses	species	JC polyomavirus	10632	10624	1993-08-02 01:00:00	dsDNA viruses, no RNA stage				Viruses	Polyomaviridae	Polyomavirus
	22830631	265	Viruses	species	JC polyomavirus	10632	10624	1993-08-02 01:00:00	dsDNA viruses, no RNA stage				Viruses	Polyomaviridae	Polyomavirus
	22830638	264	Viruses	species	JC polyomavirus	10632	10624	1993-08-02 01:00:00	dsDNA viruses, no RNA stage				Viruses	Polyomaviridae	Polyomavirus
	22830645	265	Viruses	species	JC polyomavirus	10632	10624	1993-08-02 01:00:00	dsDNA viruses, no RNA stage				Viruses	Polyomaviridae	Polyomavirus
	22830652	264	Viruses	species	JC polyomavirus	10632	10624	1993-08-02 01:00:00	dsDNA viruses, no RNA stage				Viruses	Polyomaviridae	Polyomavirus
	22830659	265	Viruses	species	JC polyomavirus	10632	10624	1993-08-02 01:00:00	dsDNA viruses, no RNA stage				Viruses	Polyomaviridae	Polyomavirus
	22830666	267	Viruses	species	JC polyomavirus	10632	10624	1993-08-02 01:00:00	dsDNA viruses, no RNA stage				Viruses	Polyomaviridae	Polyomavirus
	22830673	264	Viruses	species	JC polyomavirus	10632	10624	1993-08-02 01:00:00	dsDNA viruses, no RNA stage				Viruses	Polyomaviridae	Polyomavirus
	22830680	265	Viruses	species	JC polyomavirus	10632	10624	1993-08-02 01:00:00	dsDNA viruses, no RNA stage				Viruses	Polyomaviridae	Polyomavirus
	22830687	277	Viruses	species	JC polyomavirus	10632	10624	1993-08-02 01:00:00	dsDNA viruses, no RNA stage				Viruses	Polyomaviridae	Polyomavirus
	22830694	254	Viruses	species	JC polyomavirus	10632	10624	1993-08-02 01:00:00	dsDNA viruses, no RNA stage				Viruses	Polyomaviridae	Polyomavirus
	22830701	265	Viruses	species	JC polyomavirus	10632	10624	1993-08-02 01:00:00	dsDNA viruses, no RNA stage				Viruses	Polyomaviridae	Polyomavirus
	22830708	267	Viruses	species	JC polyomavirus	10632	10624	1993-08-02 01:00:00	dsDNA viruses, no RNA stage				Viruses	Polyomaviridae	Polyomavirus
	22830715	264	Viruses	species	JC polyomavirus	10632	10624	1993-08-02 01:00:00	dsDNA viruses, no RNA stage				Viruses	Polyomaviridae	Polyomavirus
	22830722	287	Viruses	species	JC polyomavirus	10632	10624	1993-08-02 01:00:00	dsDNA viruses, no RNA stage				Viruses	Polyomaviridae	Polyomavirus
	22830729	265	Viruses	species	JC polyomavirus	10632	10624	1993-08-02 01:00:00	dsDNA viruses, no RNA stage				Viruses	Polyomaviridae	Polyomavirus
	22830736	265	Viruses	species	JC polyomavirus	10632	10624	1993-08-02 01:00:00	dsDNA viruses, no RNA stage				Viruses	Polyomaviridae	Polyomavirus
	22830743	265	Viruses	species	JC polyomavirus	10632	10624	1993-08-02 01:00:00	dsDNA viruses, no RNA stage				Viruses	Polyomaviridae	Polyomavirus
	24636303	245	Viruses	species	JC polyomavirus	10632	10624	1993-08-02 01:00:00	dsDNA viruses, no RNA stage				Viruses	Polyomaviridae	Polyomavirus
	24636310	264	Viruses	species	JC polyomavirus	10632	10624	1993-08-02 01:00:00	dsDNA viruses, no RNA stage				Viruses	Polyomaviridae	Polyomavirus
	24636317	282	Viruses	species	JC polyomavirus	10632	10624	1993-08-02 01:00:00	dsDNA viruses, no RNA stage				Viruses	Polyomaviridae	Polyomavirus
	24636324	264	Viruses	species	JC polyomavirus	10632	10624	1993-08-02 01:00:00	dsDNA viruses, no RNA stage				Viruses	Polyomaviridae	Polyomavirus
	24636331	264	Viruses	species	JC polyomavirus	10632	10624	1993-08-02 01:00:00	dsDNA viruses, no RNA stage				Viruses	Polyomaviridae	Polyomavirus
	24636338	263	Viruses	species	JC polyomavirus	10632	10624	1993-08-02 01:00:00	dsDNA viruses, no RNA stage				Viruses	Polyomaviridae	Polyomavirus
	24636345	254	Viruses	species	JC polyomavirus	10632	10624	1993-08-02 01:00:00	dsDNA viruses, no RNA stage				Viruses	Polyomaviridae	Polyomavirus
	24636352	254	Viruses	species	JC polyomavirus	10632	10624	1993-08-02 01:00:00	dsDNA viruses, no RNA stage				Viruses	Polyomaviridae	Polyomavirus
	24636359	254	Viruses	species	JC polyomavirus	10632	10624	1993-08-02 01:00:00	dsDNA viruses, no RNA stage				Viruses	Polyomaviridae	Polyomavirus
	24636366	254	Viruses	species	JC polyomavirus	10632	10624	1993-08-02 01:00:00	dsDNA viruses, no RNA stage				Viruses	Polyomaviridae	Polyomavirus
	24636373	267	Viruses	species	JC polyomavirus	10632	10624	1993-08-02 01:00:00	dsDNA viruses, no RNA stage				Viruses	Polyomaviridae	Polyomavirus
	24636380	264	Viruses	species	JC polyomavirus	10632	10624	1993-08-02 01:00:00	dsDNA viruses, no RNA stage				Viruses	Polyomaviridae	Polyomavirus
	24636387	265	Viruses	species	JC polyomavirus	10632	10624	1993-08-02 01:00:00	dsDNA viruses, no RNA stage				Viruses	Polyomaviridae	Polyomavirus
	24636394	267	Viruses	species	JC polyomavirus	10632	10624	1993-08-02 01:00:00	dsDNA viruses, no RNA stage				Viruses	Polyomaviridae	Polyomavirus
	24636401	267	Viruses	species	JC polyomavirus	10632	10624	1993-08-02 01:00:00	dsDNA viruses, no RNA stage				Viruses	Polyomaviridae	Polyomavirus
	24636408	264	Viruses	species	JC polyomavirus	10632	10624	1993-08-02 01:00:00	dsDNA viruses, no RNA stage				Viruses	Polyomaviridae	Polyomavirus
	24636415	267	Viruses	species	JC polyomavirus	10632	10624	1993-08-02 01:00:00	dsDNA viruses, no RNA stage				Viruses	Polyomaviridae	Polyomavirus
	24636422	254	Viruses	species	JC polyomavirus	10632	10624	1993-08-02 01:00:00	dsDNA viruses, no RNA stage				Viruses	Polyomaviridae	Polyomavirus
	24636429	253	Viruses	species	JC polyomavirus	10632	10624	1993-08-02 01:00:00	dsDNA viruses, no RNA stage				Viruses	Polyomaviridae	Polyomavirus
	24636436	253	Viruses	species	JC polyomavirus	10632	10624	1993-08-02 01:00:00	dsDNA viruses, no RNA stage				Viruses	Polyomaviridae	Polyomavirus
	24636443	253	Viruses	species	JC polyomavirus	10632	10624	1993-08-02 01:00:00	dsDNA viruses, no RNA stage				Viruses	Polyomaviridae	Polyomavirus
	24636450	253	Viruses	species	JC polyomavirus	10632	10624	1993-08-02 01:00:00	dsDNA viruses, no RNA stage				Viruses	Polyomaviridae	Polyomavirus
	24636457	253	Viruses	species	JC polyomavirus	10632	10624	1993-08-02 01:00:00	dsDNA viruses, no RNA stage				Viruses	Polyomaviridae	Polyomavirus
	24636464	264	Viruses	species	JC polyomavirus	10632	10624	1993-08-02 01:00:00	dsDNA viruses, no RNA stage				Viruses	Polyomaviridae	Polyomavirus
	24636471	264	Viruses	species	JC polyomavirus	10632	10624	1993-08-02 01:00:00	dsDNA viruses, no RNA stage				Viruses	Polyomaviridae	Polyomavirus
	24636478	384	Viruses	species	JC polyomavirus	10632	10624	1993-08-02 01:00:00	dsDNA viruses, no RNA stage				Viruses	Polyomaviridae	Polyomavirus
	26541426	361	Viruses	species	JC polyomavirus	10632	10624	1993-08-02 01:00:00	dsDNA viruses, no RNA stage				Viruses	Polyomaviridae	Polyomavirus
	26541434	361	Viruses	species	JC polyomavirus	10632	10624	1993-08-02 01:00:00	dsDNA viruses, no RNA stage				Viruses	Polyomaviridae	Polyomavirus
	26541442	354	Viruses	species	JC polyomavirus	10632	10624	1993-08-02 01:00:00	dsDNA viruses, no RNA stage				Viruses	Polyomaviridae	Polyomavirus
	26541450	354	Viruses	species	JC polyomavirus	10632	10624	1993-08-02 01:00:00	dsDNA viruses, no RNA stage				Viruses	Polyomaviridae	Polyomavirus
	26541459	354	Viruses	species	JC polyomavirus	10632	10624	1993-08-02 01:00:00	dsDNA viruses, no RNA stage				Viruses	Polyomaviridae	Polyomavirus
	28376615	4754	Viruses	species	Murine pneumotropic virus	229278	10624	2003-05-01 18:02:00	dsDNA viruses, no RNA stage				Viruses	Polyomaviridae	Polyomavirus
	29292581	262	Viruses	species	JC polyomavirus	10632	10624	1993-08-02 01:00:00	dsDNA viruses, no RNA stage				Viruses	Polyomaviridae	Polyomavirus
	29292588	264	Viruses	species	JC polyomavirus	10632	10624	1993-08-02 01:00:00	dsDNA viruses, no RNA stage				Viruses	Polyomaviridae	Polyomavirus
	29292595	264	Viruses	species	JC polyomavirus	10632	10624	1993-08-02 01:00:00	dsDNA viruses, no RNA stage				Viruses	Polyomaviridae	Polyomavirus
	29292602	277	Viruses	species	JC polyomavirus	10632	10624	1993-08-02 01:00:00	dsDNA viruses, no RNA stage				Viruses	Polyomaviridae	Polyomavirus
	29292609	264	Viruses	species	JC polyomavirus	10632	10624	1993-08-02 01:00:00	dsDNA viruses, no RNA stage				Viruses	Polyomaviridae	Polyomavirus
	29292616	264	Viruses	species	JC polyomavirus	10632	10624	1993-08-02 01:00:00	dsDNA viruses, no RNA stage				Viruses	Polyomaviridae	Polyomavirus
	29292623	277	Viruses	species	JC polyomavirus	10632	10624	1993-08-02 01:00:00	dsDNA viruses, no RNA stage				Viruses	Polyomaviridae	Polyomavirus
	29292630	264	Viruses	species	JC polyomavirus	10632	10624	1993-08-02 01:00:00	dsDNA viruses, no RNA stage				Viruses	Polyomaviridae	Polyomavirus
	29292638	264	Viruses	species	JC polyomavirus	10632	10624	1993-08-02 01:00:00	dsDNA viruses, no RNA stage				Viruses	Polyomaviridae	Polyomavirus
	29292645	265	Viruses	species	JC polyomavirus	10632	10624	1993-08-02 01:00:00	dsDNA viruses, no RNA stage				Viruses	Polyomaviridae	Polyomavirus
	30408029	391	Viruses	species	Simian virus 40	10633	10624	1993-08-03 01:00:00	dsDNA viruses, no RNA stage				Viruses	Polyomaviridae	Polyomavirus
	30408044	300	Viruses	species	Simian virus 40	10633	10624	1993-08-03 01:00:00	dsDNA viruses, no RNA stage				Viruses	Polyomaviridae	Polyomavirus
	30518360	5256	Viruses	species	Goose hemorrhagic polyomavirus	208491	344005	2003-05-09 18:03:00	dsDNA viruses, no RNA stage	unclassified Polyomavirus			Viruses	Polyomaviridae	Polyomavirus
	32344861	360	Viruses	species	JC polyomavirus	10632	10624	1993-08-02 01:00:00	dsDNA viruses, no RNA stage				Viruses	Polyomaviridae	Polyomavirus
	32344868	360	Viruses	species	JC polyomavirus	10632	10624	1993-08-02 01:00:00	dsDNA viruses, no RNA stage				Viruses	Polyomaviridae	Polyomavirus
	32344875	360	Viruses	species	JC polyomavirus	10632	10624	1993-08-02 01:00:00	dsDNA viruses, no RNA stage				Viruses	Polyomaviridae	Polyomavirus
	32344882	478	Viruses	species	JC polyomavirus	10632	10624	1993-08-02 01:00:00	dsDNA viruses, no RNA stage				Viruses	Polyomaviridae	Polyomavirus
	32344889	358	Viruses	species	JC polyomavirus	10632	10624	1993-08-02 01:00:00	dsDNA viruses, no RNA stage				Viruses	Polyomaviridae	Polyomavirus
	32344896	354	Viruses	species	JC polyomavirus	10632	10624	1993-08-02 01:00:00	dsDNA viruses, no RNA stage				Viruses	Polyomaviridae	Polyomavirus
	32344903	361	Viruses	species	JC polyomavirus	10632	10624	1993-08-02 01:00:00	dsDNA viruses, no RNA stage				Viruses	Polyomaviridae	Polyomavirus
	32344910	361	Viruses	species	JC polyomavirus	10632	10624	1993-08-02 01:00:00	dsDNA viruses, no RNA stage				Viruses	Polyomaviridae	Polyomavirus
	32344917	361	Viruses	species	JC polyomavirus	10632	10624	1993-08-02 01:00:00	dsDNA viruses, no RNA stage				Viruses	Polyomaviridae	Polyomavirus
	34014425	265	Viruses	species	JC polyomavirus	10632	10624	1993-08-02 01:00:00	dsDNA viruses, no RNA stage				Viruses	Polyomaviridae	Polyomavirus
	34014436	458	Viruses	species	JC polyomavirus	10632	10624	1993-08-02 01:00:00	dsDNA viruses, no RNA stage				Viruses	Polyomaviridae	Polyomavirus
	34014443	264	Viruses	species	JC polyomavirus	10632	10624	1993-08-02 01:00:00	dsDNA viruses, no RNA stage				Viruses	Polyomaviridae	Polyomavirus
	34014450	264	Viruses	species	JC polyomavirus	10632	10624	1993-08-02 01:00:00	dsDNA viruses, no RNA stage				Viruses	Polyomaviridae	Polyomavirus
	34014457	264	Viruses	species	JC polyomavirus	10632	10624	1993-08-02 01:00:00	dsDNA viruses, no RNA stage				Viruses	Polyomaviridae	Polyomavirus
	34014464	369	Viruses	species	JC polyomavirus	10632	10624	1993-08-02 01:00:00	dsDNA viruses, no RNA stage				Viruses	Polyomaviridae	Polyomavirus
	34014471	552	Viruses	species	JC polyomavirus	10632	10624	1993-08-02 01:00:00	dsDNA viruses, no RNA stage				Viruses	Polyomaviridae	Polyomavirus
	34014476	369	Viruses	species	JC polyomavirus	10632	10624	1993-08-02 01:00:00	dsDNA viruses, no RNA stage				Viruses	Polyomaviridae	Polyomavirus
	34014483	369	Viruses	species	JC polyomavirus	10632	10624	1993-08-02 01:00:00	dsDNA viruses, no RNA stage				Viruses	Polyomaviridae	Polyomavirus
	34014490	369	Viruses	species	JC polyomavirus	10632	10624	1993-08-02 01:00:00	dsDNA viruses, no RNA stage				Viruses	Polyomaviridae	Polyomavirus
	34014497	455	Viruses	species	JC polyomavirus	10632	10624	1993-08-02 01:00:00	dsDNA viruses, no RNA stage				Viruses	Polyomaviridae	Polyomavirus
	34014504	370	Viruses	species	JC polyomavirus	10632	10624	1993-08-02 01:00:00	dsDNA viruses, no RNA stage				Viruses	Polyomaviridae	Polyomavirus
	34014511	264	Viruses	species	JC polyomavirus	10632	10624	1993-08-02 01:00:00	dsDNA viruses, no RNA stage				Viruses	Polyomaviridae	Polyomavirus
	34014518	278	Viruses	species	JC polyomavirus	10632	10624	1993-08-02 01:00:00	dsDNA viruses, no RNA stage				Viruses	Polyomaviridae	Polyomavirus
	34014525	264	Viruses	species	JC polyomavirus	10632	10624	1993-08-02 01:00:00	dsDNA viruses, no RNA stage				Viruses	Polyomaviridae	Polyomavirus
	34014532	264	Viruses	species	JC polyomavirus	10632	10624	1993-08-02 01:00:00	dsDNA viruses, no RNA stage				Viruses	Polyomaviridae	Polyomavirus
	34014539	265	Viruses	species	JC polyomavirus	10632	10624	1993-08-02 01:00:00	dsDNA viruses, no RNA stage				Viruses	Polyomaviridae	Polyomavirus
	34014546	265	Viruses	species	JC polyomavirus	10632	10624	1993-08-02 01:00:00	dsDNA viruses, no RNA stage				Viruses	Polyomaviridae	Polyomavirus
	34014553	265	Viruses	species	JC polyomavirus	10632	10624	1993-08-02 01:00:00	dsDNA viruses, no RNA stage				Viruses	Polyomaviridae	Polyomavirus
	34014560	264	Viruses	species	JC polyomavirus	10632	10624	1993-08-02 01:00:00	dsDNA viruses, no RNA stage				Viruses	Polyomaviridae	Polyomavirus
	34014567	384	Viruses	species	JC polyomavirus	10632	10624	1993-08-02 01:00:00	dsDNA viruses, no RNA stage				Viruses	Polyomaviridae	Polyomavirus
	34014574	264	Viruses	species	JC polyomavirus	10632	10624	1993-08-02 01:00:00	dsDNA viruses, no RNA stage				Viruses	Polyomaviridae	Polyomavirus
	34014581	264	Viruses	species	JC polyomavirus	10632	10624	1993-08-02 01:00:00	dsDNA viruses, no RNA stage				Viruses	Polyomaviridae	Polyomavirus
	34221940	427	Viruses	species	JC polyomavirus	10632	10624	1993-08-02 01:00:00	dsDNA viruses, no RNA stage				Viruses	Polyomaviridae	Polyomavirus
	37050845	358	Viruses	species	JC polyomavirus	10632	10624	1993-08-02 01:00:00	dsDNA viruses, no RNA stage				Viruses	Polyomaviridae	Polyomavirus
	37050852	358	Viruses	species	JC polyomavirus	10632	10624	1993-08-02 01:00:00	dsDNA viruses, no RNA stage				Viruses	Polyomaviridae	Polyomavirus
	37777757	358	Viruses	species	JC polyomavirus	10632	10624	1993-08-02 01:00:00	dsDNA viruses, no RNA stage				Viruses	Polyomaviridae	Polyomavirus
	37777764	357	Viruses	species	JC polyomavirus	10632	10624	1993-08-02 01:00:00	dsDNA viruses, no RNA stage				Viruses	Polyomaviridae	Polyomavirus
	37992998	362	Viruses	species	JC polyomavirus	10632	10624	1993-08-02 01:00:00	dsDNA viruses, no RNA stage				Viruses	Polyomaviridae	Polyomavirus
	38156669	351	Viruses	species	JC polyomavirus	10632	10624	1993-08-02 01:00:00	dsDNA viruses, no RNA stage				Viruses	Polyomaviridae	Polyomavirus
	38176425	351	Viruses	species	JC polyomavirus	10632	10624	1993-08-02 01:00:00	dsDNA viruses, no RNA stage				Viruses	Polyomaviridae	Polyomavirus
	38195904	362	Viruses	species	JC polyomavirus	10632	10624	1993-08-02 01:00:00	dsDNA viruses, no RNA stage				Viruses	Polyomaviridae	Polyomavirus
	39939393	362	Viruses	species	JC polyomavirus	10632	10624	1993-08-02 01:00:00	dsDNA viruses, no RNA stage				Viruses	Polyomaviridae	Polyomavirus
	40313340	265	Viruses	species	JC polyomavirus	10632	10624	1993-08-02 01:00:00	dsDNA viruses, no RNA stage				Viruses	Polyomaviridae	Polyomavirus
	40313346	265	Viruses	species	JC polyomavirus	10632	10624	1993-08-02 01:00:00	dsDNA viruses, no RNA stage				Viruses	Polyomaviridae	Polyomavirus
	40313353	265	Viruses	species	JC polyomavirus	10632	10624	1993-08-02 01:00:00	dsDNA viruses, no RNA stage				Viruses	Polyomaviridae	Polyomavirus
	40313360	265	Viruses	species	JC polyomavirus	10632	10624	1993-08-02 01:00:00	dsDNA viruses, no RNA stage				Viruses	Polyomaviridae	Polyomavirus
	40313367	265	Viruses	species	JC polyomavirus	10632	10624	1993-08-02 01:00:00	dsDNA viruses, no RNA stage				Viruses	Polyomaviridae	Polyomavirus
	40313374	265	Viruses	species	JC polyomavirus	10632	10624	1993-08-02 01:00:00	dsDNA viruses, no RNA stage				Viruses	Polyomaviridae	Polyomavirus
	40313381	276	Viruses	species	JC polyomavirus	10632	10624	1993-08-02 01:00:00	dsDNA viruses, no RNA stage				Viruses	Polyomaviridae	Polyomavirus
	40313388	265	Viruses	species	JC polyomavirus	10632	10624	1993-08-02 01:00:00	dsDNA viruses, no RNA stage				Viruses	Polyomaviridae	Polyomavirus
	40313395	265	Viruses	species	JC polyomavirus	10632	10624	1993-08-02 01:00:00	dsDNA viruses, no RNA stage				Viruses	Polyomaviridae	Polyomavirus
	40313402	265	Viruses	species	JC polyomavirus	10632	10624	1993-08-02 01:00:00	dsDNA viruses, no RNA stage				Viruses	Polyomaviridae	Polyomavirus
	40313409	265	Viruses	species	JC polyomavirus	10632	10624	1993-08-02 01:00:00	dsDNA viruses, no RNA stage				Viruses	Polyomaviridae	Polyomavirus
	40313416	265	Viruses	species	JC polyomavirus	10632	10624	1993-08-02 01:00:00	dsDNA viruses, no RNA stage				Viruses	Polyomaviridae	Polyomavirus
	40313423	385	Viruses	species	JC polyomavirus	10632	10624	1993-08-02 01:00:00	dsDNA viruses, no RNA stage				Viruses	Polyomaviridae	Polyomavirus
	40313430	265	Viruses	species	JC polyomavirus	10632	10624	1993-08-02 01:00:00	dsDNA viruses, no RNA stage				Viruses	Polyomaviridae	Polyomavirus
	40313437	265	Viruses	species	JC polyomavirus	10632	10624	1993-08-02 01:00:00	dsDNA viruses, no RNA stage				Viruses	Polyomaviridae	Polyomavirus
	40313444	385	Viruses	species	JC polyomavirus	10632	10624	1993-08-02 01:00:00	dsDNA viruses, no RNA stage				Viruses	Polyomaviridae	Polyomavirus
	40313451	265	Viruses	species	JC polyomavirus	10632	10624	1993-08-02 01:00:00	dsDNA viruses, no RNA stage				Viruses	Polyomaviridae	Polyomavirus
	40313458	265	Viruses	species	JC polyomavirus	10632	10624	1993-08-02 01:00:00	dsDNA viruses, no RNA stage				Viruses	Polyomaviridae	Polyomavirus
	40313465	276	Viruses	species	JC polyomavirus	10632	10624	1993-08-02 01:00:00	dsDNA viruses, no RNA stage				Viruses	Polyomaviridae	Polyomavirus
	40313472	265	Viruses	species	JC polyomavirus	10632	10624	1993-08-02 01:00:00	dsDNA viruses, no RNA stage				Viruses	Polyomaviridae	Polyomavirus
	40313479	265	Viruses	species	JC polyomavirus	10632	10624	1993-08-02 01:00:00	dsDNA viruses, no RNA stage				Viruses	Polyomaviridae	Polyomavirus
	40313486	265	Viruses	species	JC polyomavirus	10632	10624	1993-08-02 01:00:00	dsDNA viruses, no RNA stage				Viruses	Polyomaviridae	Polyomavirus
	40313493	265	Viruses	species	JC polyomavirus	10632	10624	1993-08-02 01:00:00	dsDNA viruses, no RNA stage				Viruses	Polyomaviridae	Polyomavirus
	40313500	265	Viruses	species	JC polyomavirus	10632	10624	1993-08-02 01:00:00	dsDNA viruses, no RNA stage				Viruses	Polyomaviridae	Polyomavirus
	40313507	265	Viruses	species	JC polyomavirus	10632	10624	1993-08-02 01:00:00	dsDNA viruses, no RNA stage				Viruses	Polyomaviridae	Polyomavirus
	40313514	265	Viruses	species	JC polyomavirus	10632	10624	1993-08-02 01:00:00	dsDNA viruses, no RNA stage				Viruses	Polyomaviridae	Polyomavirus
	40313521	265	Viruses	species	JC polyomavirus	10632	10624	1993-08-02 01:00:00	dsDNA viruses, no RNA stage				Viruses	Polyomaviridae	Polyomavirus
	40313528	265	Viruses	species	JC polyomavirus	10632	10624	1993-08-02 01:00:00	dsDNA viruses, no RNA stage				Viruses	Polyomaviridae	Polyomavirus
	40363485	265	Viruses	species	JC polyomavirus	10632	10624	1993-08-02 01:00:00	dsDNA viruses, no RNA stage				Viruses	Polyomaviridae	Polyomavirus
	40363492	284	Viruses	species	JC polyomavirus	10632	10624	1993-08-02 01:00:00	dsDNA viruses, no RNA stage				Viruses	Polyomaviridae	Polyomavirus
	40737211	362	Viruses	species	JC polyomavirus	10632	10624	1993-08-02 01:00:00	dsDNA viruses, no RNA stage				Viruses	Polyomaviridae	Polyomavirus
	40737218	360	Viruses	species	JC polyomavirus	10632	10624	1993-08-02 01:00:00	dsDNA viruses, no RNA stage				Viruses	Polyomaviridae	Polyomavirus
	40737225	358	Viruses	species	JC polyomavirus	10632	10624	1993-08-02 01:00:00	dsDNA viruses, no RNA stage				Viruses	Polyomaviridae	Polyomavirus
	40737232	358	Viruses	species	JC polyomavirus	10632	10624	1993-08-02 01:00:00	dsDNA viruses, no RNA stage				Viruses	Polyomaviridae	Polyomavirus
	40737239	360	Viruses	species	JC polyomavirus	10632	10624	1993-08-02 01:00:00	dsDNA viruses, no RNA stage				Viruses	Polyomaviridae	Polyomavirus
	40737246	362	Viruses	species	JC polyomavirus	10632	10624	1993-08-02 01:00:00	dsDNA viruses, no RNA stage				Viruses	Polyomaviridae	Polyomavirus
	40737253	362	Viruses	species	JC polyomavirus	10632	10624	1993-08-02 01:00:00	dsDNA viruses, no RNA stage				Viruses	Polyomaviridae	Polyomavirus
	40737260	362	Viruses	species	JC polyomavirus	10632	10624	1993-08-02 01:00:00	dsDNA viruses, no RNA stage				Viruses	Polyomaviridae	Polyomavirus
	40737267	362	Viruses	species	JC polyomavirus	10632	10624	1993-08-02 01:00:00	dsDNA viruses, no RNA stage				Viruses	Polyomaviridae	Polyomavirus
	40737274	358	Viruses	species	JC polyomavirus	10632	10624	1993-08-02 01:00:00	dsDNA viruses, no RNA stage				Viruses	Polyomaviridae	Polyomavirus
	40737281	362	Viruses	species	JC polyomavirus	10632	10624	1993-08-02 01:00:00	dsDNA viruses, no RNA stage				Viruses	Polyomaviridae	Polyomavirus
	40737288	362	Viruses	species	JC polyomavirus	10632	10624	1993-08-02 01:00:00	dsDNA viruses, no RNA stage				Viruses	Polyomaviridae	Polyomavirus
	40737295	361	Viruses	species	JC polyomavirus	10632	10624	1993-08-02 01:00:00	dsDNA viruses, no RNA stage				Viruses	Polyomaviridae	Polyomavirus
	40737539	362	Viruses	species	JC polyomavirus	10632	10624	1993-08-02 01:00:00	dsDNA viruses, no RNA stage				Viruses	Polyomaviridae	Polyomavirus
	40737546	357	Viruses	species	JC polyomavirus	10632	10624	1993-08-02 01:00:00	dsDNA viruses, no RNA stage				Viruses	Polyomaviridae	Polyomavirus
	40737553	358	Viruses	species	JC polyomavirus	10632	10624	1993-08-02 01:00:00	dsDNA viruses, no RNA stage				Viruses	Polyomaviridae	Polyomavirus
	40737560	358	Viruses	species	JC polyomavirus	10632	10624	1993-08-02 01:00:00	dsDNA viruses, no RNA stage				Viruses	Polyomaviridae	Polyomavirus
	42416965	181	Viruses	species	Simian virus 40	10633	10624	1993-08-03 01:00:00	dsDNA viruses, no RNA stage				Viruses	Polyomaviridae	Polyomavirus
	42768820	161	Viruses	species	Simian virus 40	10633	10624	1993-08-03 01:00:00	dsDNA viruses, no RNA stage				Viruses	Polyomaviridae	Polyomavirus
	44885688	265	Viruses	species	JC polyomavirus	10632	10624	1993-08-02 01:00:00	dsDNA viruses, no RNA stage				Viruses	Polyomaviridae	Polyomavirus
	44885695	265	Viruses	species	JC polyomavirus	10632	10624	1993-08-02 01:00:00	dsDNA viruses, no RNA stage				Viruses	Polyomaviridae	Polyomavirus
	44885702	265	Viruses	species	JC polyomavirus	10632	10624	1993-08-02 01:00:00	dsDNA viruses, no RNA stage				Viruses	Polyomaviridae	Polyomavirus
	44885709	265	Viruses	species	JC polyomavirus	10632	10624	1993-08-02 01:00:00	dsDNA viruses, no RNA stage				Viruses	Polyomaviridae	Polyomavirus
	44885716	265	Viruses	species	JC polyomavirus	10632	10624	1993-08-02 01:00:00	dsDNA viruses, no RNA stage				Viruses	Polyomaviridae	Polyomavirus
	44885730	265	Viruses	species	JC polyomavirus	10632	10624	1993-08-02 01:00:00	dsDNA viruses, no RNA stage				Viruses	Polyomaviridae	Polyomavirus
	44885737	264	Viruses	species	JC polyomavirus	10632	10624	1993-08-02 01:00:00	dsDNA viruses, no RNA stage				Viruses	Polyomaviridae	Polyomavirus
	44885744	265	Viruses	species	JC polyomavirus	10632	10624	1993-08-02 01:00:00	dsDNA viruses, no RNA stage				Viruses	Polyomaviridae	Polyomavirus
	44885751	265	Viruses	species	JC polyomavirus	10632	10624	1993-08-02 01:00:00	dsDNA viruses, no RNA stage				Viruses	Polyomaviridae	Polyomavirus
	44885758	253	Viruses	species	JC polyomavirus	10632	10624	1993-08-02 01:00:00	dsDNA viruses, no RNA stage				Viruses	Polyomaviridae	Polyomavirus
	44885765	265	Viruses	species	JC polyomavirus	10632	10624	1993-08-02 01:00:00	dsDNA viruses, no RNA stage				Viruses	Polyomaviridae	Polyomavirus
	44885772	265	Viruses	species	JC polyomavirus	10632	10624	1993-08-02 01:00:00	dsDNA viruses, no RNA stage				Viruses	Polyomaviridae	Polyomavirus
	44885779	265	Viruses	species	JC polyomavirus	10632	10624	1993-08-02 01:00:00	dsDNA viruses, no RNA stage				Viruses	Polyomaviridae	Polyomavirus
	44885786	265	Viruses	species	JC polyomavirus	10632	10624	1993-08-02 01:00:00	dsDNA viruses, no RNA stage				Viruses	Polyomaviridae	Polyomavirus
	47078334	279	Viruses	species	JC polyomavirus	10632	10624	1993-08-02 01:00:00	dsDNA viruses, no RNA stage				Viruses	Polyomaviridae	Polyomavirus
	47078341	265	Viruses	species	JC polyomavirus	10632	10624	1993-08-02 01:00:00	dsDNA viruses, no RNA stage				Viruses	Polyomaviridae	Polyomavirus
	47078348	264	Viruses	species	JC polyomavirus	10632	10624	1993-08-02 01:00:00	dsDNA viruses, no RNA stage				Viruses	Polyomaviridae	Polyomavirus
	47078355	245	Viruses	species	JC polyomavirus	10632	10624	1993-08-02 01:00:00	dsDNA viruses, no RNA stage				Viruses	Polyomaviridae	Polyomavirus
	47078362	285	Viruses	species	JC polyomavirus	10632	10624	1993-08-02 01:00:00	dsDNA viruses, no RNA stage				Viruses	Polyomaviridae	Polyomavirus
	47847030	253	Viruses	species	JC polyomavirus	10632	10624	1993-08-02 01:00:00	dsDNA viruses, no RNA stage				Viruses	Polyomaviridae	Polyomavirus
	47847044	264	Viruses	species	JC polyomavirus	10632	10624	1993-08-02 01:00:00	dsDNA viruses, no RNA stage				Viruses	Polyomaviridae	Polyomavirus
	47847058	264	Viruses	species	JC polyomavirus	10632	10624	1993-08-02 01:00:00	dsDNA viruses, no RNA stage				Viruses	Polyomaviridae	Polyomavirus
	47847065	264	Viruses	species	JC polyomavirus	10632	10624	1993-08-02 01:00:00	dsDNA viruses, no RNA stage				Viruses	Polyomaviridae	Polyomavirus
	47847072	264	Viruses	species	JC polyomavirus	10632	10624	1993-08-02 01:00:00	dsDNA viruses, no RNA stage				Viruses	Polyomaviridae	Polyomavirus
	47847079	264	Viruses	species	JC polyomavirus	10632	10624	1993-08-02 01:00:00	dsDNA viruses, no RNA stage				Viruses	Polyomaviridae	Polyomavirus
	47847100	264	Viruses	species	JC polyomavirus	10632	10624	1993-08-02 01:00:00	dsDNA viruses, no RNA stage				Viruses	Polyomaviridae	Polyomavirus
	47847107	265	Viruses	species	JC polyomavirus	10632	10624	1993-08-02 01:00:00	dsDNA viruses, no RNA stage				Viruses	Polyomaviridae	Polyomavirus
	48869447	215	Viruses	species	BK polyomavirus	10629	10624	1993-04-23 01:00:00	dsDNA viruses, no RNA stage				Viruses	Polyomaviridae	Polyomavirus
	48869454	277	Viruses	species	BK polyomavirus	10629	10624	1993-04-23 01:00:00	dsDNA viruses, no RNA stage				Viruses	Polyomaviridae	Polyomavirus
	48869461	277	Viruses	species	BK polyomavirus	10629	10624	1993-04-23 01:00:00	dsDNA viruses, no RNA stage				Viruses	Polyomaviridae	Polyomavirus
	48869468	295	Viruses	species	BK polyomavirus	10629	10624	1993-04-23 01:00:00	dsDNA viruses, no RNA stage				Viruses	Polyomaviridae	Polyomavirus
	48869475	295	Viruses	species	BK polyomavirus	10629	10624	1993-04-23 01:00:00	dsDNA viruses, no RNA stage				Viruses	Polyomaviridae	Polyomavirus
	48869482	295	Viruses	species	BK polyomavirus	10629	10624	1993-04-23 01:00:00	dsDNA viruses, no RNA stage				Viruses	Polyomaviridae	Polyomavirus
	48869489	298	Viruses	species	BK polyomavirus	10629	10624	1993-04-23 01:00:00	dsDNA viruses, no RNA stage				Viruses	Polyomaviridae	Polyomavirus
	48869496	295	Viruses	species	BK polyomavirus	10629	10624	1993-04-23 01:00:00	dsDNA viruses, no RNA stage				Viruses	Polyomaviridae	Polyomavirus
	48869503	295	Viruses	species	BK polyomavirus	10629	10624	1993-04-23 01:00:00	dsDNA viruses, no RNA stage				Viruses	Polyomaviridae	Polyomavirus
	48869510	295	Viruses	species	BK polyomavirus	10629	10624	1993-04-23 01:00:00	dsDNA viruses, no RNA stage				Viruses	Polyomaviridae	Polyomavirus
	48869517	295	Viruses	species	BK polyomavirus	10629	10624	1993-04-23 01:00:00	dsDNA viruses, no RNA stage				Viruses	Polyomaviridae	Polyomavirus
	48869524	295	Viruses	species	BK polyomavirus	10629	10624	1993-04-23 01:00:00	dsDNA viruses, no RNA stage				Viruses	Polyomaviridae	Polyomavirus
	48869531	295	Viruses	species	BK polyomavirus	10629	10624	1993-04-23 01:00:00	dsDNA viruses, no RNA stage				Viruses	Polyomaviridae	Polyomavirus
	48869538	299	Viruses	species	BK polyomavirus	10629	10624	1993-04-23 01:00:00	dsDNA viruses, no RNA stage				Viruses	Polyomaviridae	Polyomavirus
	48869545	279	Viruses	species	BK polyomavirus	10629	10624	1993-04-23 01:00:00	dsDNA viruses, no RNA stage				Viruses	Polyomaviridae	Polyomavirus
	49658538	264	Viruses	species	JC polyomavirus	10632	10624	1993-08-02 01:00:00	dsDNA viruses, no RNA stage				Viruses	Polyomaviridae	Polyomavirus
	55953225	265	Viruses	species	JC polyomavirus	10632	10624	1993-08-02 01:00:00	dsDNA viruses, no RNA stage				Viruses	Polyomaviridae	Polyomavirus
	55953231	264	Viruses	species	JC polyomavirus	10632	10624	1993-08-02 01:00:00	dsDNA viruses, no RNA stage				Viruses	Polyomaviridae	Polyomavirus
	55953237	264	Viruses	species	JC polyomavirus	10632	10624	1993-08-02 01:00:00	dsDNA viruses, no RNA stage				Viruses	Polyomaviridae	Polyomavirus
	55953243	264	Viruses	species	JC polyomavirus	10632	10624	1993-08-02 01:00:00	dsDNA viruses, no RNA stage				Viruses	Polyomaviridae	Polyomavirus
	62086816	265	Viruses	species	JC polyomavirus	10632	10624	1993-08-02 01:00:00	dsDNA viruses, no RNA stage				Viruses	Polyomaviridae	Polyomavirus
	66730884	264	Viruses	species	JC polyomavirus	10632	10624	1993-08-02 01:00:00	dsDNA viruses, no RNA stage				Viruses	Polyomaviridae	Polyomavirus
	66730891	264	Viruses	species	JC polyomavirus	10632	10624	1993-08-02 01:00:00	dsDNA viruses, no RNA stage				Viruses	Polyomaviridae	Polyomavirus
	68444967	265	Viruses	species	JC polyomavirus	10632	10624	1993-08-02 01:00:00	dsDNA viruses, no RNA stage				Viruses	Polyomaviridae	Polyomavirus
	68444974	265	Viruses	species	JC polyomavirus	10632	10624	1993-08-02 01:00:00	dsDNA viruses, no RNA stage				Viruses	Polyomaviridae	Polyomavirus
	68444981	265	Viruses	species	JC polyomavirus	10632	10624	1993-08-02 01:00:00	dsDNA viruses, no RNA stage				Viruses	Polyomaviridae	Polyomavirus
	68444988	255	Viruses	species	JC polyomavirus	10632	10624	1993-08-02 01:00:00	dsDNA viruses, no RNA stage				Viruses	Polyomaviridae	Polyomavirus
	68444995	265	Viruses	species	JC polyomavirus	10632	10624	1993-08-02 01:00:00	dsDNA viruses, no RNA stage				Viruses	Polyomaviridae	Polyomavirus
	68445002	265	Viruses	species	JC polyomavirus	10632	10624	1993-08-02 01:00:00	dsDNA viruses, no RNA stage				Viruses	Polyomaviridae	Polyomavirus
	68445009	265	Viruses	species	JC polyomavirus	10632	10624	1993-08-02 01:00:00	dsDNA viruses, no RNA stage				Viruses	Polyomaviridae	Polyomavirus
	68445016	265	Viruses	species	JC polyomavirus	10632	10624	1993-08-02 01:00:00	dsDNA viruses, no RNA stage				Viruses	Polyomaviridae	Polyomavirus
	68445023	265	Viruses	species	JC polyomavirus	10632	10624	1993-08-02 01:00:00	dsDNA viruses, no RNA stage				Viruses	Polyomaviridae	Polyomavirus
	68445030	265	Viruses	species	JC polyomavirus	10632	10624	1993-08-02 01:00:00	dsDNA viruses, no RNA stage				Viruses	Polyomaviridae	Polyomavirus
	68445037	265	Viruses	species	JC polyomavirus	10632	10624	1993-08-02 01:00:00	dsDNA viruses, no RNA stage				Viruses	Polyomaviridae	Polyomavirus
	68445044	265	Viruses	species	JC polyomavirus	10632	10624	1993-08-02 01:00:00	dsDNA viruses, no RNA stage				Viruses	Polyomaviridae	Polyomavirus
	68445051	265	Viruses	species	JC polyomavirus	10632	10624	1993-08-02 01:00:00	dsDNA viruses, no RNA stage				Viruses	Polyomaviridae	Polyomavirus
	68445058	265	Viruses	species	JC polyomavirus	10632	10624	1993-08-02 01:00:00	dsDNA viruses, no RNA stage				Viruses	Polyomaviridae	Polyomavirus
	68445065	265	Viruses	species	JC polyomavirus	10632	10624	1993-08-02 01:00:00	dsDNA viruses, no RNA stage				Viruses	Polyomaviridae	Polyomavirus
	68445072	265	Viruses	species	JC polyomavirus	10632	10624	1993-08-02 01:00:00	dsDNA viruses, no RNA stage				Viruses	Polyomaviridae	Polyomavirus
	68445079	265	Viruses	species	JC polyomavirus	10632	10624	1993-08-02 01:00:00	dsDNA viruses, no RNA stage				Viruses	Polyomaviridae	Polyomavirus
	68445086	265	Viruses	species	JC polyomavirus	10632	10624	1993-08-02 01:00:00	dsDNA viruses, no RNA stage				Viruses	Polyomaviridae	Polyomavirus
	68445093	265	Viruses	species	JC polyomavirus	10632	10624	1993-08-02 01:00:00	dsDNA viruses, no RNA stage				Viruses	Polyomaviridae	Polyomavirus
	68445100	255	Viruses	species	JC polyomavirus	10632	10624	1993-08-02 01:00:00	dsDNA viruses, no RNA stage				Viruses	Polyomaviridae	Polyomavirus
	68445107	265	Viruses	species	JC polyomavirus	10632	10624	1993-08-02 01:00:00	dsDNA viruses, no RNA stage				Viruses	Polyomaviridae	Polyomavirus
	68445114	265	Viruses	species	JC polyomavirus	10632	10624	1993-08-02 01:00:00	dsDNA viruses, no RNA stage				Viruses	Polyomaviridae	Polyomavirus
	68445121	265	Viruses	species	JC polyomavirus	10632	10624	1993-08-02 01:00:00	dsDNA viruses, no RNA stage				Viruses	Polyomaviridae	Polyomavirus
	68445128	265	Viruses	species	JC polyomavirus	10632	10624	1993-08-02 01:00:00	dsDNA viruses, no RNA stage				Viruses	Polyomaviridae	Polyomavirus
	68445135	255	Viruses	species	JC polyomavirus	10632	10624	1993-08-02 01:00:00	dsDNA viruses, no RNA stage				Viruses	Polyomaviridae	Polyomavirus
	68445142	265	Viruses	species	JC polyomavirus	10632	10624	1993-08-02 01:00:00	dsDNA viruses, no RNA stage				Viruses	Polyomaviridae	Polyomavirus
	68445149	265	Viruses	species	JC polyomavirus	10632	10624	1993-08-02 01:00:00	dsDNA viruses, no RNA stage				Viruses	Polyomaviridae	Polyomavirus
	68445156	277	Viruses	species	JC polyomavirus	10632	10624	1993-08-02 01:00:00	dsDNA viruses, no RNA stage				Viruses	Polyomaviridae	Polyomavirus
	68445163	265	Viruses	species	JC polyomavirus	10632	10624	1993-08-02 01:00:00	dsDNA viruses, no RNA stage				Viruses	Polyomaviridae	Polyomavirus
	68445170	265	Viruses	species	JC polyomavirus	10632	10624	1993-08-02 01:00:00	dsDNA viruses, no RNA stage				Viruses	Polyomaviridae	Polyomavirus
	68445177	265	Viruses	species	JC polyomavirus	10632	10624	1993-08-02 01:00:00	dsDNA viruses, no RNA stage				Viruses	Polyomaviridae	Polyomavirus
	68445184	265	Viruses	species	JC polyomavirus	10632	10624	1993-08-02 01:00:00	dsDNA viruses, no RNA stage				Viruses	Polyomaviridae	Polyomavirus
	68445191	265	Viruses	species	JC polyomavirus	10632	10624	1993-08-02 01:00:00	dsDNA viruses, no RNA stage				Viruses	Polyomaviridae	Polyomavirus
	68445198	265	Viruses	species	JC polyomavirus	10632	10624	1993-08-02 01:00:00	dsDNA viruses, no RNA stage				Viruses	Polyomaviridae	Polyomavirus
	68445205	265	Viruses	species	JC polyomavirus	10632	10624	1993-08-02 01:00:00	dsDNA viruses, no RNA stage				Viruses	Polyomaviridae	Polyomavirus
	68445212	265	Viruses	species	JC polyomavirus	10632	10624	1993-08-02 01:00:00	dsDNA viruses, no RNA stage				Viruses	Polyomaviridae	Polyomavirus
	68445219	265	Viruses	species	JC polyomavirus	10632	10624	1993-08-02 01:00:00	dsDNA viruses, no RNA stage				Viruses	Polyomaviridae	Polyomavirus
	68445226	265	Viruses	species	JC polyomavirus	10632	10624	1993-08-02 01:00:00	dsDNA viruses, no RNA stage				Viruses	Polyomaviridae	Polyomavirus
	68445233	265	Viruses	species	JC polyomavirus	10632	10624	1993-08-02 01:00:00	dsDNA viruses, no RNA stage				Viruses	Polyomaviridae	Polyomavirus
	68445240	265	Viruses	species	JC polyomavirus	10632	10624	1993-08-02 01:00:00	dsDNA viruses, no RNA stage				Viruses	Polyomaviridae	Polyomavirus
	68445247	265	Viruses	species	JC polyomavirus	10632	10624	1993-08-02 01:00:00	dsDNA viruses, no RNA stage				Viruses	Polyomaviridae	Polyomavirus
	68445254	265	Viruses	species	JC polyomavirus	10632	10624	1993-08-02 01:00:00	dsDNA viruses, no RNA stage				Viruses	Polyomaviridae	Polyomavirus
	68445261	265	Viruses	species	JC polyomavirus	10632	10624	1993-08-02 01:00:00	dsDNA viruses, no RNA stage				Viruses	Polyomaviridae	Polyomavirus
	68445268	265	Viruses	species	JC polyomavirus	10632	10624	1993-08-02 01:00:00	dsDNA viruses, no RNA stage				Viruses	Polyomaviridae	Polyomavirus
	68445275	265	Viruses	species	JC polyomavirus	10632	10624	1993-08-02 01:00:00	dsDNA viruses, no RNA stage				Viruses	Polyomaviridae	Polyomavirus
	68445282	265	Viruses	species	JC polyomavirus	10632	10624	1993-08-02 01:00:00	dsDNA viruses, no RNA stage				Viruses	Polyomaviridae	Polyomavirus
	68445289	265	Viruses	species	JC polyomavirus	10632	10624	1993-08-02 01:00:00	dsDNA viruses, no RNA stage				Viruses	Polyomaviridae	Polyomavirus
	76667075	265	Viruses	species	JC polyomavirus	10632	10624	1993-08-02 01:00:00	dsDNA viruses, no RNA stage				Viruses	Polyomaviridae	Polyomavirus
	76667082	265	Viruses	species	JC polyomavirus	10632	10624	1993-08-02 01:00:00	dsDNA viruses, no RNA stage				Viruses	Polyomaviridae	Polyomavirus
	76667089	265	Viruses	species	JC polyomavirus	10632	10624	1993-08-02 01:00:00	dsDNA viruses, no RNA stage				Viruses	Polyomaviridae	Polyomavirus
	76667096	265	Viruses	species	JC polyomavirus	10632	10624	1993-08-02 01:00:00	dsDNA viruses, no RNA stage				Viruses	Polyomaviridae	Polyomavirus
	76667104	265	Viruses	species	JC polyomavirus	10632	10624	1993-08-02 01:00:00	dsDNA viruses, no RNA stage				Viruses	Polyomaviridae	Polyomavirus
	76667111	265	Viruses	species	JC polyomavirus	10632	10624	1993-08-02 01:00:00	dsDNA viruses, no RNA stage				Viruses	Polyomaviridae	Polyomavirus
	76667118	265	Viruses	species	JC polyomavirus	10632	10624	1993-08-02 01:00:00	dsDNA viruses, no RNA stage				Viruses	Polyomaviridae	Polyomavirus
	76667125	276	Viruses	species	JC polyomavirus	10632	10624	1993-08-02 01:00:00	dsDNA viruses, no RNA stage				Viruses	Polyomaviridae	Polyomavirus
	76667132	265	Viruses	species	JC polyomavirus	10632	10624	1993-08-02 01:00:00	dsDNA viruses, no RNA stage				Viruses	Polyomaviridae	Polyomavirus
	76667139	265	Viruses	species	JC polyomavirus	10632	10624	1993-08-02 01:00:00	dsDNA viruses, no RNA stage				Viruses	Polyomaviridae	Polyomavirus
	76667146	265	Viruses	species	JC polyomavirus	10632	10624	1993-08-02 01:00:00	dsDNA viruses, no RNA stage				Viruses	Polyomaviridae	Polyomavirus
	76667153	265	Viruses	species	JC polyomavirus	10632	10624	1993-08-02 01:00:00	dsDNA viruses, no RNA stage				Viruses	Polyomaviridae	Polyomavirus
	76667160	265	Viruses	species	JC polyomavirus	10632	10624	1993-08-02 01:00:00	dsDNA viruses, no RNA stage				Viruses	Polyomaviridae	Polyomavirus
	76667167	265	Viruses	species	JC polyomavirus	10632	10624	1993-08-02 01:00:00	dsDNA viruses, no RNA stage				Viruses	Polyomaviridae	Polyomavirus
	76667174	265	Viruses	species	JC polyomavirus	10632	10624	1993-08-02 01:00:00	dsDNA viruses, no RNA stage				Viruses	Polyomaviridae	Polyomavirus
	77799529	464	Viruses	species	BK polyomavirus	10629	10624	1993-04-23 01:00:00	dsDNA viruses, no RNA stage				Viruses	Polyomaviridae	Polyomavirus
	78191099	3930	Viruses	species	Simian virus 40	10633	10624	1993-08-03 01:00:00	dsDNA viruses, no RNA stage				Viruses	Polyomaviridae	Polyomavirus
	82524372	5230	Viruses	species	Simian virus 12	46771	10624	1996-04-05 12:53:00	dsDNA viruses, no RNA stage				Viruses	Polyomaviridae	Polyomavirus
	83281130	464	Viruses	species	BK polyomavirus	10629	10624	1993-04-23 01:00:00	dsDNA viruses, no RNA stage				Viruses	Polyomaviridae	Polyomavirus
	83281137	464	Viruses	species	BK polyomavirus	10629	10624	1993-04-23 01:00:00	dsDNA viruses, no RNA stage				Viruses	Polyomaviridae	Polyomavirus
	83281144	2119	Viruses	species	BK polyomavirus	10629	10624	1993-04-23 01:00:00	dsDNA viruses, no RNA stage				Viruses	Polyomaviridae	Polyomavirus
	83281151	464	Viruses	species	BK polyomavirus	10629	10624	1993-04-23 01:00:00	dsDNA viruses, no RNA stage				Viruses	Polyomaviridae	Polyomavirus
	83281158	464	Viruses	species	BK polyomavirus	10629	10624	1993-04-23 01:00:00	dsDNA viruses, no RNA stage				Viruses	Polyomaviridae	Polyomavirus
	83415612	319	Viruses	species	BK polyomavirus	10629	10624	1993-04-23 01:00:00	dsDNA viruses, no RNA stage				Viruses	Polyomaviridae	Polyomavirus
	84794480	276	Viruses	species	JC polyomavirus	10632	10624	1993-08-02 01:00:00	dsDNA viruses, no RNA stage				Viruses	Polyomaviridae	Polyomavirus
	84794487	276	Viruses	species	JC polyomavirus	10632	10624	1993-08-02 01:00:00	dsDNA viruses, no RNA stage				Viruses	Polyomaviridae	Polyomavirus
	84794494	276	Viruses	species	JC polyomavirus	10632	10624	1993-08-02 01:00:00	dsDNA viruses, no RNA stage				Viruses	Polyomaviridae	Polyomavirus
	84794501	276	Viruses	species	JC polyomavirus	10632	10624	1993-08-02 01:00:00	dsDNA viruses, no RNA stage				Viruses	Polyomaviridae	Polyomavirus
	84794508	276	Viruses	species	JC polyomavirus	10632	10624	1993-08-02 01:00:00	dsDNA viruses, no RNA stage				Viruses	Polyomaviridae	Polyomavirus
	90288029	346	Viruses	species	Simian virus 12	46771	10624	1996-04-05 12:53:00	dsDNA viruses, no RNA stage				Viruses	Polyomaviridae	Polyomavirus
	90403553	5079	Viruses	species	Crow polyomavirus	349563	344005	2006-03-20 18:00:22	dsDNA viruses, no RNA stage	unclassified Polyomavirus			Viruses	Polyomaviridae	Polyomavirus
	90403560	5278	Viruses	species	Finch polyomavirus	349564	344005	2006-03-20 18:00:22	dsDNA viruses, no RNA stage	unclassified Polyomavirus			Viruses	Polyomaviridae	Polyomavirus
	103484476	226	Viruses	species	JC polyomavirus	10632	10624	1993-08-02 01:00:00	dsDNA viruses, no RNA stage				Viruses	Polyomaviridae	Polyomavirus
	103484483	225	Viruses	species	JC polyomavirus	10632	10624	1993-08-02 01:00:00	dsDNA viruses, no RNA stage				Viruses	Polyomaviridae	Polyomavirus
	103484490	242	Viruses	species	JC polyomavirus	10632	10624	1993-08-02 01:00:00	dsDNA viruses, no RNA stage				Viruses	Polyomaviridae	Polyomavirus
	109150299	478	Viruses	species	BK polyomavirus	10629	10624	1993-04-23 01:00:00	dsDNA viruses, no RNA stage				Viruses	Polyomaviridae	Polyomavirus
	109150306	478	Viruses	species	BK polyomavirus	10629	10624	1993-04-23 01:00:00	dsDNA viruses, no RNA stage				Viruses	Polyomaviridae	Polyomavirus
	109150313	464	Viruses	species	BK polyomavirus	10629	10624	1993-04-23 01:00:00	dsDNA viruses, no RNA stage				Viruses	Polyomaviridae	Polyomavirus
	109150320	464	Viruses	species	BK polyomavirus	10629	10624	1993-04-23 01:00:00	dsDNA viruses, no RNA stage				Viruses	Polyomaviridae	Polyomavirus
	109150327	2120	Viruses	species	BK polyomavirus	10629	10624	1993-04-23 01:00:00	dsDNA viruses, no RNA stage				Viruses	Polyomaviridae	Polyomavirus
	109150334	2121	Viruses	species	BK polyomavirus	10629	10624	1993-04-23 01:00:00	dsDNA viruses, no RNA stage				Viruses	Polyomaviridae	Polyomavirus
	109727191	323	Viruses	species	Simian virus 40	10633	10624	1993-08-03 01:00:00	dsDNA viruses, no RNA stage				Viruses	Polyomaviridae	Polyomavirus
	111559189	453	Viruses	species	JC polyomavirus	10632	10624	1993-08-02 01:00:00	dsDNA viruses, no RNA stage				Viruses	Polyomaviridae	Polyomavirus
	111559196	517	Viruses	species	JC polyomavirus	10632	10624	1993-08-02 01:00:00	dsDNA viruses, no RNA stage				Viruses	Polyomaviridae	Polyomavirus
	112419603	429	Viruses	species	BK polyomavirus	10629	10624	1993-04-23 01:00:00	dsDNA viruses, no RNA stage				Viruses	Polyomaviridae	Polyomavirus
	112419610	478	Viruses	species	BK polyomavirus	10629	10624	1993-04-23 01:00:00	dsDNA viruses, no RNA stage				Viruses	Polyomaviridae	Polyomavirus
	112419617	468	Viruses	species	BK polyomavirus	10629	10624	1993-04-23 01:00:00	dsDNA viruses, no RNA stage				Viruses	Polyomaviridae	Polyomavirus
	112419624	467	Viruses	species	BK polyomavirus	10629	10624	1993-04-23 01:00:00	dsDNA viruses, no RNA stage				Viruses	Polyomaviridae	Polyomavirus
	112419631	464	Viruses	species	BK polyomavirus	10629	10624	1993-04-23 01:00:00	dsDNA viruses, no RNA stage				Viruses	Polyomaviridae	Polyomavirus
	112419638	464	Viruses	species	BK polyomavirus	10629	10624	1993-04-23 01:00:00	dsDNA viruses, no RNA stage				Viruses	Polyomaviridae	Polyomavirus
	112419645	468	Viruses	species	BK polyomavirus	10629	10624	1993-04-23 01:00:00	dsDNA viruses, no RNA stage				Viruses	Polyomaviridae	Polyomavirus
	112419652	464	Viruses	species	BK polyomavirus	10629	10624	1993-04-23 01:00:00	dsDNA viruses, no RNA stage				Viruses	Polyomaviridae	Polyomavirus
	112419659	464	Viruses	species	BK polyomavirus	10629	10624	1993-04-23 01:00:00	dsDNA viruses, no RNA stage				Viruses	Polyomaviridae	Polyomavirus
	112419666	464	Viruses	species	BK polyomavirus	10629	10624	1993-04-23 01:00:00	dsDNA viruses, no RNA stage				Viruses	Polyomaviridae	Polyomavirus
	112419673	464	Viruses	species	BK polyomavirus	10629	10624	1993-04-23 01:00:00	dsDNA viruses, no RNA stage				Viruses	Polyomaviridae	Polyomavirus
	112419680	464	Viruses	species	BK polyomavirus	10629	10624	1993-04-23 01:00:00	dsDNA viruses, no RNA stage				Viruses	Polyomaviridae	Polyomavirus
	112419687	464	Viruses	species	BK polyomavirus	10629	10624	1993-04-23 01:00:00	dsDNA viruses, no RNA stage				Viruses	Polyomaviridae	Polyomavirus
	112419694	1705	Viruses	species	BK polyomavirus	10629	10624	1993-04-23 01:00:00	dsDNA viruses, no RNA stage				Viruses	Polyomaviridae	Polyomavirus
	112419701	2146	Viruses	species	BK polyomavirus	10629	10624	1993-04-23 01:00:00	dsDNA viruses, no RNA stage				Viruses	Polyomaviridae	Polyomavirus
	112419708	1874	Viruses	species	BK polyomavirus	10629	10624	1993-04-23 01:00:00	dsDNA viruses, no RNA stage				Viruses	Polyomaviridae	Polyomavirus
	112419715	2087	Viruses	species	BK polyomavirus	10629	10624	1993-04-23 01:00:00	dsDNA viruses, no RNA stage				Viruses	Polyomaviridae	Polyomavirus
	112806971	458	Viruses	species	BK polyomavirus	10629	10624	1993-04-23 01:00:00	dsDNA viruses, no RNA stage				Viruses	Polyomaviridae	Polyomavirus
	112806978	458	Viruses	species	BK polyomavirus	10629	10624	1993-04-23 01:00:00	dsDNA viruses, no RNA stage				Viruses	Polyomaviridae	Polyomavirus
	112806985	458	Viruses	species	BK polyomavirus	10629	10624	1993-04-23 01:00:00	dsDNA viruses, no RNA stage				Viruses	Polyomaviridae	Polyomavirus
	112806992	458	Viruses	species	BK polyomavirus	10629	10624	1993-04-23 01:00:00	dsDNA viruses, no RNA stage				Viruses	Polyomaviridae	Polyomavirus
	112806999	458	Viruses	species	BK polyomavirus	10629	10624	1993-04-23 01:00:00	dsDNA viruses, no RNA stage				Viruses	Polyomaviridae	Polyomavirus
	112807006	1967	Viruses	species	BK polyomavirus	10629	10624	1993-04-23 01:00:00	dsDNA viruses, no RNA stage				Viruses	Polyomaviridae	Polyomavirus
	112807012	1967	Viruses	species	BK polyomavirus	10629	10624	1993-04-23 01:00:00	dsDNA viruses, no RNA stage				Viruses	Polyomaviridae	Polyomavirus
	119116419	265	Viruses	species	JC polyomavirus	10632	10624	1993-08-02 01:00:00	dsDNA viruses, no RNA stage				Viruses	Polyomaviridae	Polyomavirus
	119116426	265	Viruses	species	JC polyomavirus	10632	10624	1993-08-02 01:00:00	dsDNA viruses, no RNA stage				Viruses	Polyomaviridae	Polyomavirus
	119116433	265	Viruses	species	JC polyomavirus	10632	10624	1993-08-02 01:00:00	dsDNA viruses, no RNA stage				Viruses	Polyomaviridae	Polyomavirus
	119116440	265	Viruses	species	JC polyomavirus	10632	10624	1993-08-02 01:00:00	dsDNA viruses, no RNA stage				Viruses	Polyomaviridae	Polyomavirus
	119116447	265	Viruses	species	JC polyomavirus	10632	10624	1993-08-02 01:00:00	dsDNA viruses, no RNA stage				Viruses	Polyomaviridae	Polyomavirus
	119116454	265	Viruses	species	JC polyomavirus	10632	10624	1993-08-02 01:00:00	dsDNA viruses, no RNA stage				Viruses	Polyomaviridae	Polyomavirus
	119116461	265	Viruses	species	JC polyomavirus	10632	10624	1993-08-02 01:00:00	dsDNA viruses, no RNA stage				Viruses	Polyomaviridae	Polyomavirus
	119116468	256	Viruses	species	JC polyomavirus	10632	10624	1993-08-02 01:00:00	dsDNA viruses, no RNA stage				Viruses	Polyomaviridae	Polyomavirus
	119116475	265	Viruses	species	JC polyomavirus	10632	10624	1993-08-02 01:00:00	dsDNA viruses, no RNA stage				Viruses	Polyomaviridae	Polyomavirus
	119116482	375	Viruses	species	JC polyomavirus	10632	10624	1993-08-02 01:00:00	dsDNA viruses, no RNA stage				Viruses	Polyomaviridae	Polyomavirus
	119116489	265	Viruses	species	JC polyomavirus	10632	10624	1993-08-02 01:00:00	dsDNA viruses, no RNA stage				Viruses	Polyomaviridae	Polyomavirus
	119116496	265	Viruses	species	JC polyomavirus	10632	10624	1993-08-02 01:00:00	dsDNA viruses, no RNA stage				Viruses	Polyomaviridae	Polyomavirus
	119116503	265	Viruses	species	JC polyomavirus	10632	10624	1993-08-02 01:00:00	dsDNA viruses, no RNA stage				Viruses	Polyomaviridae	Polyomavirus
	119116510	265	Viruses	species	JC polyomavirus	10632	10624	1993-08-02 01:00:00	dsDNA viruses, no RNA stage				Viruses	Polyomaviridae	Polyomavirus
	119116517	265	Viruses	species	JC polyomavirus	10632	10624	1993-08-02 01:00:00	dsDNA viruses, no RNA stage				Viruses	Polyomaviridae	Polyomavirus
	119116524	265	Viruses	species	JC polyomavirus	10632	10624	1993-08-02 01:00:00	dsDNA viruses, no RNA stage				Viruses	Polyomaviridae	Polyomavirus
	119116531	265	Viruses	species	JC polyomavirus	10632	10624	1993-08-02 01:00:00	dsDNA viruses, no RNA stage				Viruses	Polyomaviridae	Polyomavirus
	119116538	265	Viruses	species	JC polyomavirus	10632	10624	1993-08-02 01:00:00	dsDNA viruses, no RNA stage				Viruses	Polyomaviridae	Polyomavirus
	119926572	446	Viruses	species	BK polyomavirus	10629	10624	1993-04-23 01:00:00	dsDNA viruses, no RNA stage				Viruses	Polyomaviridae	Polyomavirus
	119926579	446	Viruses	species	BK polyomavirus	10629	10624	1993-04-23 01:00:00	dsDNA viruses, no RNA stage				Viruses	Polyomaviridae	Polyomavirus
	119926586	446	Viruses	species	BK polyomavirus	10629	10624	1993-04-23 01:00:00	dsDNA viruses, no RNA stage				Viruses	Polyomaviridae	Polyomavirus
	119926593	460	Viruses	species	BK polyomavirus	10629	10624	1993-04-23 01:00:00	dsDNA viruses, no RNA stage				Viruses	Polyomaviridae	Polyomavirus
	119926600	1274	Viruses	species	BK polyomavirus	10629	10624	1993-04-23 01:00:00	dsDNA viruses, no RNA stage				Viruses	Polyomaviridae	Polyomavirus
	119926615	461	Viruses	species	BK polyomavirus	10629	10624	1993-04-23 01:00:00	dsDNA viruses, no RNA stage				Viruses	Polyomaviridae	Polyomavirus
	119926622	458	Viruses	species	BK polyomavirus	10629	10624	1993-04-23 01:00:00	dsDNA viruses, no RNA stage				Viruses	Polyomaviridae	Polyomavirus
	119926629	459	Viruses	species	BK polyomavirus	10629	10624	1993-04-23 01:00:00	dsDNA viruses, no RNA stage				Viruses	Polyomaviridae	Polyomavirus
	119926636	1436	Viruses	species	BK polyomavirus	10629	10624	1993-04-23 01:00:00	dsDNA viruses, no RNA stage				Viruses	Polyomaviridae	Polyomavirus
	119926644	458	Viruses	species	BK polyomavirus	10629	10624	1993-04-23 01:00:00	dsDNA viruses, no RNA stage				Viruses	Polyomaviridae	Polyomavirus
	119926651	479	Viruses	species	BK polyomavirus	10629	10624	1993-04-23 01:00:00	dsDNA viruses, no RNA stage				Viruses	Polyomaviridae	Polyomavirus
	119926659	458	Viruses	species	BK polyomavirus	10629	10624	1993-04-23 01:00:00	dsDNA viruses, no RNA stage				Viruses	Polyomaviridae	Polyomavirus
	119926666	466	Viruses	species	BK polyomavirus	10629	10624	1993-04-23 01:00:00	dsDNA viruses, no RNA stage				Viruses	Polyomaviridae	Polyomavirus
	119926673	462	Viruses	species	BK polyomavirus	10629	10624	1993-04-23 01:00:00	dsDNA viruses, no RNA stage				Viruses	Polyomaviridae	Polyomavirus
	119926680	457	Viruses	species	BK polyomavirus	10629	10624	1993-04-23 01:00:00	dsDNA viruses, no RNA stage				Viruses	Polyomaviridae	Polyomavirus
	119926687	478	Viruses	species	BK polyomavirus	10629	10624	1993-04-23 01:00:00	dsDNA viruses, no RNA stage				Viruses	Polyomaviridae	Polyomavirus
	119926806	446	Viruses	species	BK polyomavirus	10629	10624	1993-04-23 01:00:00	dsDNA viruses, no RNA stage				Viruses	Polyomaviridae	Polyomavirus
	119926813	509	Viruses	species	BK polyomavirus	10629	10624	1993-04-23 01:00:00	dsDNA viruses, no RNA stage				Viruses	Polyomaviridae	Polyomavirus
	119926820	464	Viruses	species	BK polyomavirus	10629	10624	1993-04-23 01:00:00	dsDNA viruses, no RNA stage				Viruses	Polyomaviridae	Polyomavirus
	119926827	464	Viruses	species	BK polyomavirus	10629	10624	1993-04-23 01:00:00	dsDNA viruses, no RNA stage				Viruses	Polyomaviridae	Polyomavirus
	119926834	478	Viruses	species	BK polyomavirus	10629	10624	1993-04-23 01:00:00	dsDNA viruses, no RNA stage				Viruses	Polyomaviridae	Polyomavirus
	119926842	478	Viruses	species	BK polyomavirus	10629	10624	1993-04-23 01:00:00	dsDNA viruses, no RNA stage				Viruses	Polyomaviridae	Polyomavirus
	119926849	479	Viruses	species	BK polyomavirus	10629	10624	1993-04-23 01:00:00	dsDNA viruses, no RNA stage				Viruses	Polyomaviridae	Polyomavirus
	119926856	458	Viruses	species	BK polyomavirus	10629	10624	1993-04-23 01:00:00	dsDNA viruses, no RNA stage				Viruses	Polyomaviridae	Polyomavirus
	119926863	461	Viruses	species	BK polyomavirus	10629	10624	1993-04-23 01:00:00	dsDNA viruses, no RNA stage				Viruses	Polyomaviridae	Polyomavirus
	119926870	478	Viruses	species	BK polyomavirus	10629	10624	1993-04-23 01:00:00	dsDNA viruses, no RNA stage				Viruses	Polyomaviridae	Polyomavirus
	119926879	446	Viruses	species	BK polyomavirus	10629	10624	1993-04-23 01:00:00	dsDNA viruses, no RNA stage				Viruses	Polyomaviridae	Polyomavirus
	122892776	1206	Viruses	species	Murine pneumotropic virus	229278	10624	2003-05-01 18:02:00	dsDNA viruses, no RNA stage				Viruses	Polyomaviridae	Polyomavirus
[truncated: 42,843 more rows]
