# Supplementary material for: Enhanced virome sequencing using targeted sequence capture
Source: HighWire-hosted journal article supplement (doi:10.1101/gr.191049.115), 2015-09-22
Supplement: Supplemental_Table_S8.xlsx [file Supplemental_Table_S8.xlsx]

## Sheet: Data
Supplemental Table S8
DATA
Sample ID from Table 1	Sample	Sample type	Virus identified in clinical laboratory prior to pooling	PCR results on pool	Sequencing results on pool
P1	Pooled clinical samples	Pool	Adenovirus	+	+
P2	Pooled clinical samples	Pool	Human Bocavirus	+	+
P3	Pooled clinical samples	Pool	Influenza A	+	+
P4	Pooled clinical samples	Pool	Influenza B	+	+
P5	Pooled clinical samples	Pool	Parvovirus	+	+
P6	Pooled clinical samples	Pool	Norovirus G2	+	+
P7	Pooled clinical samples	Pool	Parechovirus 1	+	+
P8	Pooled clinical samples	Pool	BK polyomavirus	+	+
P9	Pooled clinical samples	Pool	JC polyomavirus	+	+
P10	Pooled clinical samples	Pool	Rhinovirus	+	+
P11	Pooled clinical samples	Pool	Respiratory syncytial virus	+	+
P12	Pooled clinical samples	Pool	HSV-1	+	+
P13	Pooled clinical samples	Pool	Torque teno virus	Not tested	+
P14	Pooled clinical samples	Pool	HHV-3	-	+
NA	Pooled clinical samples	Pool	HHV-6	-	-
NA	Pooled clinical samples	Pool	Enterovirus	-	-
NA	Pooled clinical samples	Pool	Parainfluenzavirus 1	+	-
NA	Pooled clinical samples	Pool	Parainfluenzavirus 3	-	-
NA	Pooled clinical samples	Pool	Parainfluenzavrus 4	+	-
NA	Pooled clinical samples	Pool	Human metapneumovirus	-	-
NA	Pooled clinical samples	Pool	HHV-8	-	-
NA	Pooled clinical samples	Pool	HHV-4	-	-
Sample ID from Table 2	Sample	Sample type	Virus identified in research study	PCR results on sample	PCR results on sequencing library	Sequencing results
S1	H_LA-567-9007	Nasopharyngeal swab	Anellovirus	+	+	+
S1	H_LA-567-9007	Nasopharyngeal swab	Adenovirus	+	+	+
S1	H_LA-567-9007	Nasopharyngeal swab	KI	+	-	-
S2	H_LA-624-9065	Nasopharyngeal swab	Anellovirus	+	+	+
S2	H_LA-624-9065	Nasopharyngeal swab	Adenovirus	+	+	+
S2	H_LA-624-9065	Nasopharyngeal swab	WU polyomavirus	+	-	-
S2	H_LA-624-9065	Nasopharyngeal swab	Enterovirus/Rhinovirus	+	+	-
S3	H_LA-638-9079	Nasopharyngeal swab	Anellovirus	+	+	+
S3	H_LA-638-9079	Nasopharyngeal swab	Parainfluenzavirus 3	+	+	+
S3	H_LA-638-9079	Nasopharyngeal swab	Enterovirus/rhinovirus	+	-	-
S4	H_LA-663-9105	Nasopharyngeal swab	Anellovirus	+	+	+
S4	H_LA-663-9105	Nasopharyngeal swab	Human Bocavirus	+	+	+
S4	H_LA-663-9105	Nasopharyngeal swab	WU	+	-	-
S4	H_LA-663-9105	Nasopharyngeal swab	Enterovirus/Rhinovirus	+	-	-
S5	H_LA-723-9169	Nasopharyngeal swab	Anellovirus	+	+	+
S5	H_LA-723-9169	Nasopharyngeal swab	Enterovirus/Rhinovirus	+	-	-
S5	H_LA-723-9169	Nasopharyngeal swab	KI	+	-	-
S6	H_LA-1575-9316	Nasopharyngeal swab	Adenovirus	+	+	+
S6	H_LA-1575-9316	Nasopharyngeal swab	KI polyomavirus	+	+	+
S6	H_LA-1575-9316	Nasopharyngeal swab	Enterovirus/Rhinovirus	+	+	+
S7	H_LA-1334-9376	Stool	Adenovirus	+	+	+
S7	H_LA-1334-9376	Stool	Sapovirus	+	+	+
S7	H_LA-1334-9376	Stool	Astrovirus	+	+	+
S7	H_LA-1334-9376	Stool	HPy10	+	Not tested, no library remaining	+
S8	H_LA-1347-9383	Plasma	Anellovirus	+	+	+
S8	H_LA-1347-9383	Plasma	HHV-6	+	+	+
