# Supplementary material for: Enhanced virome sequencing using targeted sequence capture
Source: HighWire-hosted journal article supplement (doi:10.1101/gr.191049.115), 2015-09-22
Supplement: Supplemental_Table_S9.xlsx [file Supplemental_Table_S9.xlsx]

## Sheet: Sheet1
Detection of viruses by PCR and ViroCap
Supplemental Table S9
	Number of viruses detected by:
Experiment	Either PCR or ViroCap	Both PCR and ViroCap	PCR only	ViroCap only
1	15a	12	2b	1c
(pooled clinical specimens)
2	26	18	8d,e	0
(individual specimens)
Total	41	30	10	1
a Table does not include a torque teno virus detected in the clinical pool but not tested for by PCR
b Parainfluenza virus types 1 and 4; These viruses were detected by PCR with high crossing threshold (Ct) values, indicating very low levels of virus.
c Varicella-zoster virus
d Rhinovirus; This virus was detected by PCR with high crossing threshold (Ct) values, indicating very low levels of virus.
e Of the 8 viruses detected in the samples by PCR but not by sequencing, 7 were not detected in the sequencing libraries, indicating that the failure to detect was attributable to library preparation rather than ViroCap.
