# Supplementary material for: Enhanced virome sequencing using targeted sequence capture
Source: HighWire-hosted journal article supplement (doi:10.1101/gr.191049.115), 2015-09-22
Supplement: ViroCap-1.0.zip [file NBR_vertebrates.xlsx]

## Sheet: NBR_vertebrates_20140219.xls
Taxonomy	Representative Accession ID	Host	# GN's	Lineage	Segment Count	GN Accession IDs
Bovine ephemeral fever virus	NC_002526	invertebrates,vertebrates	1	Rhabdoviridae,Ephemerovirus,Bovine ephemeral fever virus	-	AF234533
Kotonkan virus	NC_017714	invertebrates,vertebrates	1	Rhabdoviridae,Ephemerovirus,Kotonkan virus	-	HM474855
Murrumbidgee virus	NC_022595	invertebrates,vertebrates	1	Bunyaviridae,Orthobunyavirus,Murrumbidgee virus	segment L	KF234253
Murrumbidgee virus	NC_022596	invertebrates,vertebrates	1	Bunyaviridae,Orthobunyavirus,Murrumbidgee virus	segment M	KF234254
Murrumbidgee virus	NC_022597	invertebrates,vertebrates	1	Bunyaviridae,Orthobunyavirus,Murrumbidgee virus	segment S	KF234255
Ngaingan virus	NC_013955	invertebrates,vertebrates	1	Rhabdoviridae,,Ngaingan virus	-	FJ715959
Tibrogargan virus	NC_020804	invertebrates,vertebrates	1	Rhabdoviridae,Tibrovirus,Tibrogargan virus	-	GQ294472
Circovirus-like genome BBC-A	NC_013020	unknown	1	Circovirus-like genome BBC-A	-	FJ959086
Circovirus-like genome CB-A	NC_013028	unknown	1	Circovirus-like genome CB-A	-	FJ959082
Circovirus-like genome CB-B	NC_013029	unknown	1	Circovirus-like genome CB-B	-	FJ959083
Circovirus-like genome RW-A	NC_013023	unknown	1	Circovirus-like genome RW-A	-	FJ959077
Circovirus-like genome RW-B	NC_013024	unknown	1	Circovirus-like genome RW-B	-	FJ959078
Circovirus-like genome RW-C	NC_013025	unknown	1	Circovirus-like genome RW-C	-	FJ959079
Circovirus-like genome RW-D	NC_013026	unknown	1	Circovirus-like genome RW-D	-	FJ959080
Circovirus-like genome RW-E	NC_013027	unknown	1	Circovirus-like genome RW-E	-	FJ959081
Circovirus-like genome SAR-A	NC_013030	unknown	1	Circovirus-like genome SAR-A	-	FJ959084
Circovirus-like genome SAR-B	NC_013018	unknown	1	Circovirus-like genome SAR-B	-	FJ959085
Dragonfly larvae associated circular virus-1	NC_023427	unknown	1	Dragonfly larvae associated circular virus-1	-	KF738873
Dragonfly larvae associated circular virus-10	NC_023436	unknown	2	Dragonfly larvae associated circular virus-10	-	KF738885,KF738884
Dragonfly larvae associated circular virus-2	NC_023428	unknown	1	Dragonfly larvae associated circular virus-2	-	KF738874
Dragonfly larvae associated circular virus-3	NC_023429	unknown	2	Dragonfly larvae associated circular virus-3	-	KF738875,KF738876
Dragonfly larvae associated circular virus-4	NC_023430	unknown	1	Dragonfly larvae associated circular virus-4	-	KF738877
Dragonfly larvae associated circular virus-5	NC_023431	unknown	2	Dragonfly larvae associated circular virus-5	-	KF738878,KF738879
Dragonfly larvae associated circular virus-6	NC_023432	unknown	1	Dragonfly larvae associated circular virus-6	-	KF738880
Dragonfly larvae associated circular virus-7	NC_023433	unknown	1	Dragonfly larvae associated circular virus-7	-	KF738881
Dragonfly larvae associated circular virus-8	NC_023434	unknown	1	Dragonfly larvae associated circular virus-8	-	KF738882
Dragonfly larvae associated circular virus-9	NC_023435	unknown	1	Dragonfly larvae associated circular virus-9	-	KF738883
Marine RNA virus JP-A	NC_009757	unknown	1	Marine RNA virus JP-A	-	EF198241
Marine RNA virus JP-B	NC_009758	unknown	1	Marine RNA virus JP-B	-	EF198242
Marine RNA virus SOG	NC_009756	unknown	1	Marine RNA virus SOG	-	EF198240
Ostreid herpesvirus 1	NC_005881	unknown	1	Malacoherpesviridae,Ostreavirus,Ostreid herpesvirus 1	-	AY509253
Pig stool associated circular ssDNA virus	NC_017916	unknown	8	Pig stool associated circular ssDNA virus	-	JX305996,JX305993,JX305991,JX305997,JX305998,JX305992,JX305994,JX305995
Pig stool associated circular ssDNA virus GER2011	NC_017916	unknown	1	Pig stool associated circular ssDNA virus	-	JQ023166
Pithovirus sibericum	NC_023423	unknown	1	Pithovirus sibericum	-	KF740664
Porcine associated stool circular virus	NC_018617	unknown	1	Porcine associated stool circular virus	-	JX274036
Porcine stool-associated circular virus 2	NC_021203	unknown	1	Porcine stool-associated circular virus 2	-	KC545226
Porcine stool-associated circular virus 3	NC_021204	unknown	4	Porcine stool-associated circular virus 3	-	KC545228,KC545229,KC545227,KC545230
Sclerotinia sclerotiorum hypovirulence associated DNA virus 1	NC_013116	unknown	5	Sclerotinia sclerotiorum hypovirulence associated DNA virus 1	-	KF268026,KF268027,KF268028,GQ365709,KF268025
Wallerfield virus	NC_023440	unknown	1	Negevirus,Wallerfield virus	-	KF042857
AKR (endogenous) murine leukemia virus	NC_001702,NC_001819,NC_001362,NC_001501	vertebrates	1	Retroviridae,Gammaretrovirus,Murine leukemia virus	-	J01998
ARV-138	NC_015132	vertebrates	1	Reoviridae,Orthoreovirus,Avian orthoreovirus	segment S1	AF218359
ARV-176	NC_015132	vertebrates	1	Reoviridae,Orthoreovirus,Avian orthoreovirus	segment S1	AF218358
Abelson murine leukemia virus	NC_001499	vertebrates	1	Retroviridae,Gammaretrovirus,Abelson murine leukemia virus	-	AF033812
Acartia tonsa copepod circovirus	NC_020099	vertebrates	1	Circoviridae,Circovirus,Acartia tonsa copepod circovirus	-	JQ837277
Adeno-associated virus - 1	NC_002077	vertebrates	1	Parvoviridae,Dependovirus,Adeno-associated virus - 1	-	AF063497
Adeno-associated virus - 4	NC_001829	vertebrates	1	Parvoviridae,Dependovirus,Adeno-associated virus - 4	-	U89790
Adeno-associated virus - 6	NC_002077	vertebrates	1	Parvoviridae,Dependovirus,Adeno-associated virus - 1	-	AF028704
Adeno-associated virus - 7	NC_006260	vertebrates	1	Parvoviridae,Dependovirus,Adeno-associated virus - 7	-	AF513851
Adeno-associated virus - 8	NC_006261	vertebrates	1	Parvoviridae,Dependovirus,Adeno-associated virus - 8	-	AF513852
African elephant polyomavirus 1	NC_022519	vertebrates	1	Polyomaviridae,Polyomavirus,African elephant polyomavirus 1	-	KF147833
African green monkey polyomavirus	NC_004763	vertebrates	1	Polyomaviridae,Polyomavirus,African green monkey polyomavirus	-	K02562
African green monkey simian foamy virus	NC_010820	vertebrates	1	Retroviridae,Spumavirus,African green monkey simian foamy virus	-	M74895
Aichi virus	NC_001918	vertebrates	10	Picornaviridae,Kobuvirus,Aichivirus A	-	FJ890523,DQ028632,AY747174,GQ927704,JX564249,GQ927705,GQ927712,AB040749,GQ927706,GQ927711
Aichi virus 1	NC_001918	vertebrates	1	Picornaviridae,Kobuvirus,Aichivirus A	-	AB010145
Alcelaphine herpesvirus 1	NC_002531	vertebrates	1	Herpesviridae,Macavirus,Alcelaphine herpesvirus 1	-	AF005370
Aleutian mink disease virus	NC_001662	vertebrates	6	Parvoviridae,Amdovirus,Aleutian mink disease virus	-	GU269892,JN040434,Z18276,M20036,GU183264,GU183265
Ambystoma tigrinum virus	NC_005832	vertebrates	1	Iridoviridae,Ranavirus,Ambystoma tigrinum virus	-	AY150217
American bat vesiculovirus TFFN-2013	NC_022755	vertebrates	1	Rhabdoviridae,Vesiculovirus,American bat vesiculovirus TFFN-2013	-	JX569193
American grass carp reovirus	NC_010584	vertebrates	1	Reoviridae,Aquareovirus,Aquareovirus G	segment 1	EF589098
American grass carp reovirus	NC_010585	vertebrates	1	Reoviridae,Aquareovirus,Aquareovirus G	segment 2	EF589099
American grass carp reovirus	NC_010586	vertebrates	1	Reoviridae,Aquareovirus,Aquareovirus G	segment 3	EF589100
American grass carp reovirus	NC_010587	vertebrates	1	Reoviridae,Aquareovirus,Aquareovirus G	segment 4	EF589101
American grass carp reovirus	NC_010588	vertebrates	1	Reoviridae,Aquareovirus,Aquareovirus G	segment 5	EF589102
American grass carp reovirus	NC_010589	vertebrates	1	Reoviridae,Aquareovirus,Aquareovirus G	segment 6	EF589103
American grass carp reovirus	NC_010590	vertebrates	1	Reoviridae,Aquareovirus,Aquareovirus G	segment 7	EF589104
American grass carp reovirus	NC_010591	vertebrates	1	Reoviridae,Aquareovirus,Aquareovirus G	segment 8	EF589105
American grass carp reovirus	NC_010592	vertebrates	1	Reoviridae,Aquareovirus,Aquareovirus G	segment 9	EF589106
American grass carp reovirus	NC_010593	vertebrates	1	Reoviridae,Aquareovirus,Aquareovirus G	segment 10	EF589107
American grass carp reovirus	NC_010594	vertebrates	1	Reoviridae,Aquareovirus,Aquareovirus G	segment 11	EF589108
Amphotropic murine leukemia virus	NC_001702,NC_001819,NC_001362,NC_001501	vertebrates	1	Retroviridae,Gammaretrovirus,Murine leukemia virus	-	AF411814
Anatid herpesvirus 1	NC_013036	vertebrates	6	Herpesviridae,Mardivirus,Anatid herpesvirus 1	-	JQ673560,KF487736,JF999965,KF263690,EU082088,JQ647509
Andrias davidianus ranavirus	NC_005946	vertebrates	1	Iridoviridae,Ranavirus,Frog virus 3	-	KC865735
Anguilla anguilla circovirus	NC_023421	vertebrates	1	Circoviridae,Circovirus,Anguilla anguilla circovirus	-	KC469701
Anguillid herpesvirus 1	NC_013668	vertebrates	1	Alloherpesviridae,Cyprinivirus,Anguillid herpesvirus 1	-	FJ940765
Aotine herpesvirus 1	NC_016447	vertebrates	1	Herpesviridae,Cytomegalovirus,Aotine herpesvirus 1	-	FJ483970
Aquareovirus A	NC_007582	vertebrates	1	Reoviridae,Aquareovirus,Aquareovirus A	segment 1	AF418294
Aquareovirus A	NC_007583	vertebrates	1	Reoviridae,Aquareovirus,Aquareovirus A	segment 2	AF418295
Aquareovirus A	NC_007584	vertebrates	1	Reoviridae,Aquareovirus,Aquareovirus A	segment 3	AF418296
Aquareovirus A	NC_007585	vertebrates	1	Reoviridae,Aquareovirus,Aquareovirus A	segment 4	AF418297
Aquareovirus A	NC_007588	vertebrates	1	Reoviridae,Aquareovirus,Aquareovirus A	segment 8	AF418301
Aquareovirus A	NC_007589	vertebrates	1	Reoviridae,Aquareovirus,Aquareovirus A	segment 9	AF418302
Aquareovirus A	NC_007590	vertebrates	1	Reoviridae,Aquareovirus,Aquareovirus A	segment 10	AF418303
Aquareovirus A	NC_007591	vertebrates	1	Reoviridae,Aquareovirus,Aquareovirus A	segment 11	AF418304
Aquareovirus A	NC_007592	vertebrates	1	Reoviridae,Aquareovirus,Aquareovirus A	segment 6	AF418299
Aquareovirus C	NC_005166	vertebrates	1	Reoviridae,Aquareovirus,Aquareovirus C	segment 1	AF403398
Aquareovirus C	NC_005167	vertebrates	1	Reoviridae,Aquareovirus,Aquareovirus C	segment 2	AF403399
Aquareovirus C	NC_005168	vertebrates	1	Reoviridae,Aquareovirus,Aquareovirus C	segment 3	AF403400
Aquareovirus C	NC_005169	vertebrates	1	Reoviridae,Aquareovirus,Aquareovirus C	segment 4	AF403401
Aquareovirus C	NC_005170	vertebrates	1	Reoviridae,Aquareovirus,Aquareovirus C	segment 5	AF403402
Aquareovirus C	NC_005171	vertebrates	1	Reoviridae,Aquareovirus,Aquareovirus C	segment 6	AF403403
Aquareovirus C	NC_005172	vertebrates	1	Reoviridae,Aquareovirus,Aquareovirus C	segment 7	AF403404
Aquareovirus C	NC_005173	vertebrates	1	Reoviridae,Aquareovirus,Aquareovirus C	segment 8	AF403405
Aquareovirus C	NC_005174	vertebrates	1	Reoviridae,Aquareovirus,Aquareovirus C	segment 9	AF403406
Aquareovirus C	NC_005175	vertebrates	1	Reoviridae,Aquareovirus,Aquareovirus C	segment 10	AF403407
Aquareovirus C	NC_005176	vertebrates	1	Reoviridae,Aquareovirus,Aquareovirus C	segment 11	AF403408
Arctic ground squirrel hepatitis B virus	NC_001484	vertebrates	1	Hepadnaviridae,Orthohepadnavirus,Ground squirrel hepatitis virus	-	U29144
Artibeus jamaicensis parvovirus 1	NC_016752	vertebrates	1	Parvoviridae,,Artibeus jamaicensis parvovirus 1	-	JQ037754
Astrovirus MLB1	NC_011400	vertebrates	5	Astroviridae,,Astrovirus MLB1	-	JQ086552,AB823732,AB823731,FJ402983,FJ222451
Astrovirus MLB1 HK05	NC_011400	vertebrates	1	Astroviridae,,Astrovirus MLB1	-	HM450380
Astrovirus MLB2	NC_016155	vertebrates	2	Astroviridae,,Astrovirus MLB2	-	JF742759,AB829252
Astrovirus MLB3	NC_019028	vertebrates	1	Astroviridae,,Astrovirus MLB3	-	JX857870
Astrovirus VA1	NC_013060	vertebrates	1	Astroviridae,,Astrovirus VA1	-	FJ973620
Astrovirus VA2	NC_018669	vertebrates	1	Astroviridae,,Astrovirus VA2	-	GQ502193
Astrovirus VA3	NC_019026	vertebrates	1	Astroviridae,,Astrovirus VA3	-	JX857868
Astrovirus VA4	NC_019027	vertebrates	1	Astroviridae,,Astrovirus VA4	-	JX857869
Astrovirus wild boar/WBAstV-1/2011/HUN	NC_016896	vertebrates	1	Astroviridae,Mamastrovirus,Astrovirus wild boar/WBAstV-1/2011/HUN	-	JQ340310
Ateles paniscus polyomavirus 1	NC_019853	vertebrates	1	Polyomaviridae,Polyomavirus,Ateles paniscus polyomavirus 1	-	JX159987
Ateline herpesvirus 3	NC_001987	vertebrates	1	Herpesviridae,Rhadinovirus,Ateline herpesvirus 3	-	AF083424
Atlantic salmon reovirus TS	NC_007583	vertebrates	1	Reoviridae,Aquareovirus,Aquareovirus A	segment 2	EF434978
Atlantic salmon reovirus TS	NC_007590	vertebrates	1	Reoviridae,Aquareovirus,Aquareovirus A	segment 10	EF434979
Atlantic salmon swim bladder sarcoma virus	NC_007654	vertebrates	1	Retroviridae,,Atlantic salmon swim bladder sarcoma virus	-	DQ174103
Avian adeno-associated virus	NC_006263	vertebrates	1	Parvoviridae,Dependovirus,Avian adeno-associated virus	-	GQ368252
Avian adeno-associated virus ATCC VR-865	NC_004828	vertebrates	2	Parvoviridae,Dependovirus,Avian adeno-associated virus ATCC VR-865	-	AY186198,AY629582
Avian adeno-associated virus strain DA-1	NC_006263	vertebrates	1	Parvoviridae,Dependovirus,Avian adeno-associated virus	-	AY629583
Avian carcinoma virus	NC_001402	vertebrates	1	Retroviridae,Alpharetrovirus,Avian carcinoma virus	-	M14008
Avian encephalomyelitis virus	NC_003990	vertebrates	3	Picornaviridae,Tremovirus,Avian encephalomyelitis virus	-	AJ225173,AY275539,AY517471
Avian endogenous retrovirus EAV-HP	NC_005947	vertebrates	7	Retroviridae,,Avian endogenous retrovirus EAV-HP	-	AJ623291,AJ238124,AJ238125,AJ623292,AJ623289,AJ292966,AJ623290
Avian gyrovirus 2	NC_015396	vertebrates	2	Circoviridae,Gyrovirus,Avian gyrovirus 2	-	HM590588,JQ690763
Avian infectious bronchitis virus (strain Beaudette CK)	NC_010800,NC_001451	vertebrates	1	Coronaviridae,Gammacoronavirus,Avian coronavirus	-	AJ311317
Avian infectious bronchitis virus partridge/GD/S14/2003	NC_010800,NC_001451	vertebrates	1	Coronaviridae,Gammacoronavirus,Avian coronavirus	-	AY646283
Avian leukemia virus	NC_015116,NC_001408	vertebrates	1	Retroviridae,Alpharetrovirus,Avian leukosis virus	-	HQ425636
Avian leukosis virus	NC_015116,NC_001408	vertebrates	59	Retroviridae,Alpharetrovirus,Avian leukosis virus	-	KF562374,JF932001,JF932004,HQ148555,AY013303,AB669569,JF931999,HM582657,AB669897,AB669433,AB670314,AB764104,AB303223,EU070900,JF826241,JX254901,JF932002,HM452340,HM235667,KF738251,KF562373,HM235669,EU070902,JF932003,DQ365814,JN389518,AB764106,FJ216405,AB669896,HM452342,HM235668,HM452339,JN624880,JF932000,AB764107,GU982310,JN389517,HQ148554,HM452341,GU982308,EU070901,AB682778,HQ900844,EF467236,JN6…
Avian leukosis virus HPRS103	NC_015116,NC_001408	vertebrates	1	Retroviridae,Alpharetrovirus,Avian leukosis virus	-	Z46390
Avian leukosis virus LR-9	NC_015116,NC_001408	vertebrates	1	Retroviridae,Alpharetrovirus,Avian leukosis virus	-	AY350569
Avian myelocytomatosis virus	NC_001866	vertebrates	2	Retroviridae,Alpharetrovirus,Avian myelocytomatosis virus	-	M11784,AF033809
Avian orthoreovirus	NC_015126	vertebrates	8	Reoviridae,Orthoreovirus,Avian orthoreovirus	segment L1	FR694191,DQ238093,DQ238094,EU616739,EU616735,HM222978,AY547458,KC183748
Avian orthoreovirus	NC_015127	vertebrates	2	Reoviridae,Orthoreovirus,Avian orthoreovirus	segment L2	HM222980,FR694192
Avian orthoreovirus	NC_015128	vertebrates	14	Reoviridae,Orthoreovirus,Avian orthoreovirus	segment L3	AY652695,AY652698,AY652700,DQ300175,AY652694,EU616738,FR694193,HM222979,AY652699,AY652697,AY652696,AY652701,EU616737,AY652693
Avian orthoreovirus	NC_015129	vertebrates	19	Reoviridae,Orthoreovirus,Avian orthoreovirus	segment M1	AY639620,AY639614,AY557188,EU616736,AY639612,AY557189,AY639619,AY639617,AY639621,AY639613,AY639616,FR694194,AY639611,AY639618,AY639615,EU616740,HM222977,DQ300176,AY639610
Avian orthoreovirus	NC_015130	vertebrates	19	Reoviridae,Orthoreovirus,Avian orthoreovirus	segment M2	AY635940,AY635938,EU616741,HM222976,AY635936,DQ300177,AY635943,AY635935,AY635945,AY635944,EU616742,AY635941,AY635934,AY635939,AY750053,AY635937,AY635942,FR694195,AY750052
Avian orthoreovirus	NC_015131	vertebrates	21	Reoviridae,Orthoreovirus,Avian orthoreovirus	segment M3	AY573911,FR694196,AY573912,AY573913,AY573908,AY573907,AY557191,AY573909,EU616744,AY573905,AY573910,KC865791,AY573914,AY608700,AY557190,AY573904,AY573915,EU616743,HM222975,AY303993,AY573906
Avian orthoreovirus	NC_015132	vertebrates	15	Reoviridae,Orthoreovirus,Avian orthoreovirus	segment S1	AF004857,JN559377,L39002,HM222974,DQ525419,JN559375,FR694197,DQ643974,DQ868790,DQ868791,DQ643975,EF057397,DQ868789,EF057398,EU526387
Avian orthoreovirus	NC_015133	vertebrates	6	Reoviridae,Orthoreovirus,Avian orthoreovirus	segment S2	AF059717,FR694198,AF104311,JN559376,AF059716,HM222973
Avian orthoreovirus	NC_015134	vertebrates	12	Reoviridae,Orthoreovirus,Avian orthoreovirus	segment S3	EF030496,JQ924284,AF059720,EF030498,AF059721,EF030497,HM222972,AF004856,EF030499,JQ916907,DQ415659,FR694199
Avian orthoreovirus	NC_015135	vertebrates	6	Reoviridae,Orthoreovirus,Avian orthoreovirus	segment S4	HM222971,AF059725,EF122838,JN559378,AF059724,FR694200
Avian orthoreovirus strain 1017-1	NC_015126	vertebrates	1	Reoviridae,Orthoreovirus,Avian orthoreovirus	segment L1	AY641740
Avian orthoreovirus strain 2408	NC_015126	vertebrates	1	Reoviridae,Orthoreovirus,Avian orthoreovirus	segment L1	AY641742
Avian orthoreovirus strain 601G	NC_015126	vertebrates	1	Reoviridae,Orthoreovirus,Avian orthoreovirus	segment L1	AY641736
Avian orthoreovirus strain 916	NC_015126	vertebrates	1	Reoviridae,Orthoreovirus,Avian orthoreovirus	segment L1	AY641737
Avian orthoreovirus strain 918	NC_015126	vertebrates	1	Reoviridae,Orthoreovirus,Avian orthoreovirus	segment L1	AY641738
Avian orthoreovirus strain 919	NC_015126	vertebrates	1	Reoviridae,Orthoreovirus,Avian orthoreovirus	segment L1	AY641739
Avian orthoreovirus strain OS161	NC_015126	vertebrates	1	Reoviridae,Orthoreovirus,Avian orthoreovirus	segment L1	AY641743
Avian orthoreovirus strain R2/TW	NC_015126	vertebrates	1	Reoviridae,Orthoreovirus,Avian orthoreovirus	segment L1	AY641744
Avian reovirus strain 1733	NC_015126	vertebrates	1	Reoviridae,Orthoreovirus,Avian orthoreovirus	segment L1	AY641741
Avian reovirus strain 1733	NC_015128	vertebrates	1	Reoviridae,Orthoreovirus,Avian orthoreovirus	segment L3	AF384171
Avian reovirus strain S1133	NC_015126	vertebrates	1	Reoviridae,Orthoreovirus,Avian orthoreovirus	segment L1	AY641735
Avian reovirus strain S1133	NC_015132	vertebrates	1	Reoviridae,Orthoreovirus,Avian orthoreovirus	segment S1	AF330703
Avian sapelovirus	NC_006553	vertebrates	1	Picornaviridae,Sapelovirus,Avian sapelovirus	-	AY563023
Avirulent turkey hemorrhagic enteritis virus	NC_001958	vertebrates	1	Adenoviridae,Siadenovirus,Turkey adenovirus A	-	AY849321
Baboon enterovirus	NC_010415	vertebrates	1	Picornaviridae,Enterovirus,Enterovirus J	-	AF326766
Baboon orthoreovirus	NC_015877	vertebrates	1	Reoviridae,Orthoreovirus,Baboon orthoreovirus	segment L1	HQ847903
Baboon orthoreovirus	NC_015878	vertebrates	1	Reoviridae,Orthoreovirus,Baboon orthoreovirus	segment L2	HQ847904
Baboon orthoreovirus	NC_015879	vertebrates	1	Reoviridae,Orthoreovirus,Baboon orthoreovirus	segment L3	HQ847905
Baboon orthoreovirus	NC_015880	vertebrates	1	Reoviridae,Orthoreovirus,Baboon orthoreovirus	segment M1	HQ847906
Baboon orthoreovirus	NC_015881	vertebrates	1	Reoviridae,Orthoreovirus,Baboon orthoreovirus	segment M2	HQ847907
Baboon orthoreovirus	NC_015882	vertebrates	1	Reoviridae,Orthoreovirus,Baboon orthoreovirus	segment M3	HQ847908
Baboon orthoreovirus	NC_015883	vertebrates	1	Reoviridae,Orthoreovirus,Baboon orthoreovirus	segment S1	AF059719
Baboon orthoreovirus	NC_015884	vertebrates	1	Reoviridae,Orthoreovirus,Baboon orthoreovirus	segment S2	AF059723
Baboon orthoreovirus	NC_015885	vertebrates	1	Reoviridae,Orthoreovirus,Baboon orthoreovirus	segment S4	AF406787
Baboon orthoreovirus	NC_015886	vertebrates	1	Reoviridae,Orthoreovirus,Baboon orthoreovirus	segment S3	AF059727
Bandicoot papillomatosis carcinomatosis virus type 1	NC_010107	vertebrates	1	Papillomaviridae,,Bandicoot papillomatosis carcinomatosis virus type 1	-	EU069819
Bandicoot papillomatosis carcinomatosis virus type 2	NC_010817	vertebrates	1	Papillomaviridae,,Bandicoot papillomatosis carcinomatosis virus type 2	-	EU277647
Barbel circovirus	NC_015399	vertebrates	2	Circoviridae,Circovirus,Barbel circovirus	-	JF279961,GU799606
Barfin flounder nervous necrosis virus	NC_013458	vertebrates	1	Nodaviridae,Betanodavirus,Barfin flounder nervous necrosis virus	segment RNA 1	EU236146
Barfin flounder nervous necrosis virus	NC_013459	vertebrates	1	Nodaviridae,Betanodavirus,Barfin flounder nervous necrosis virus	segment RNA 2	EU236147
Barfin flounder virus BF93Hok	NC_011063	vertebrates	1	Nodaviridae,Betanodavirus,Barfin flounder virus BF93Hok	segment RNA 1	EU826137
Barfin flounder virus BF93Hok	NC_011064	vertebrates	1	Nodaviridae,Betanodavirus,Barfin flounder virus BF93Hok	segment RNA 2	EU826138
Bat adeno-associated virus YNM	NC_014468	vertebrates	1	Parvoviridae,Dependovirus,Bat adeno-associated virus YNM	-	GU226971
Bat adenovirus 2	NC_015932	vertebrates	1	Adenoviridae,Mastadenovirus,Bat adenovirus B	-	JN252129
Bat adenovirus TJM	NC_016895	vertebrates	1	Adenoviridae,Mastadenovirus,Bat adenovirus A	-	GU226970
Bat circovirus	NC_021206	vertebrates	2	Circoviridae,Circovirus,Bat circovirus	-	KC339249,JX863737
Bat coronavirus (BtCoV/133/2005)	NC_008315	vertebrates	1	Coronaviridae,Betacoronavirus,Bat coronavirus (BtCoV/133/2005)	-	DQ648794
Bat coronavirus 1A	NC_010437	vertebrates	1	Coronaviridae,Alphacoronavirus,Bat coronavirus 1A	-	EU420138
Bat coronavirus 1B	NC_010436	vertebrates	1	Coronaviridae,Alphacoronavirus,Bat coronavirus 1B	-	EU420137
Bat coronavirus BM48-31/BGR/2008	NC_014470	vertebrates	1	Coronaviridae,,Bat coronavirus BM48-31/BGR/2008	-	GU190215
Bat coronavirus CDPHE15/USA/2006	NC_022103	vertebrates	1	Coronaviridae,Alphacoronavirus,Bat coronavirus CDPHE15/USA/2006	-	KF430219
Bat coronavirus HKU4-2	NC_009019	vertebrates	1	Coronaviridae,Betacoronavirus,Tylonycteris bat coronavirus HKU4	-	EF065506
Bat coronavirus HKU4-3	NC_009019	vertebrates	1	Coronaviridae,Betacoronavirus,Tylonycteris bat coronavirus HKU4	-	EF065507
Bat coronavirus HKU4-4	NC_009019	vertebrates	1	Coronaviridae,Betacoronavirus,Tylonycteris bat coronavirus HKU4	-	EF065508
Bat coronavirus HKU5-2	NC_009020	vertebrates	1	Coronaviridae,Betacoronavirus,Pipistrellus bat coronavirus HKU5	-	EF065510
Bat coronavirus HKU5-3	NC_009020	vertebrates	1	Coronaviridae,Betacoronavirus,Pipistrellus bat coronavirus HKU5	-	EF065511
Bat coronavirus HKU5-5	NC_009020	vertebrates	1	Coronaviridae,Betacoronavirus,Pipistrellus bat coronavirus HKU5	-	EF065512
Bat coronavirus HKU9-10-1	NC_009021	vertebrates	1	Coronaviridae,Betacoronavirus,Rousettus bat coronavirus HKU9	-	HM211100
Bat coronavirus HKU9-10-2	NC_009021	vertebrates	1	Coronaviridae,Betacoronavirus,Rousettus bat coronavirus HKU9	-	HM211101
Bat coronavirus HKU9-2	NC_009021	vertebrates	1	Coronaviridae,Betacoronavirus,Rousettus bat coronavirus HKU9	-	EF065514
Bat coronavirus HKU9-3	NC_009021	vertebrates	1	Coronaviridae,Betacoronavirus,Rousettus bat coronavirus HKU9	-	EF065515
Bat coronavirus HKU9-4	NC_009021	vertebrates	1	Coronaviridae,Betacoronavirus,Rousettus bat coronavirus HKU9	-	EF065516
Bat coronavirus HKU9-5-1	NC_009021	vertebrates	1	Coronaviridae,Betacoronavirus,Rousettus bat coronavirus HKU9	-	HM211098
Bat coronavirus HKU9-5-2	NC_009021	vertebrates	1	Coronaviridae,Betacoronavirus,Rousettus bat coronavirus HKU9	-	HM211099
Bat hepatitis virus	NC_020881	vertebrates	3	Hepadnaviridae,,Bat hepatitis virus	-	JX941466,JX941467,JX941468
Bat picornavirus 1	NC_015940	vertebrates	2	Picornaviridae,,Bat picornavirus 1	-	HQ595341,HQ595340
Bat picornavirus 2	NC_015941	vertebrates	2	Picornaviridae,,Bat picornavirus 2	-	HQ595342,HQ595343
Bat picornavirus 3	NC_015934	vertebrates	2	Picornaviridae,,Bat picornavirus 3	-	HQ595345,HQ595344
Beak and feather disease virus	NC_001944	vertebrates	205	Circoviridae,Circovirus,Beak and feather disease virus	-	JQ782201,GU936294,JX221005,JX221002,GU936287,JQ782197,GQ396655,JX221003,AY521238,KF188694,AF311297,JX049206,JX221025,GQ165756,GU015021,JX221014,AY450436,GU015014,HM748920,JX221001,HM748922,GU936289,AY521236,JX049195,GU936291,GU015015,JF519618,JX221031,JX221030,AB277750,GQ396653,GU936290,HM748927,HM748935,AF311299,JX221007,GU015023,KC980909,AB277747,JX221011,HM748924,GQ120621,JX221006,JX049198,AY4…
Beluga Whale coronavirus SW1	NC_010646	vertebrates	1	Coronaviridae,Gammacoronavirus,Beluga Whale coronavirus SW1	-	EU111742
Betacoronavirus England 1	NC_019843	vertebrates	1	Coronaviridae,Betacoronavirus,Middle East respiratory syndrome coronavirus	-	KC164505
Betacoronavirus Erinaceus/VMC/DEU/2012	NC_022643	vertebrates	2	Coronaviridae,Betacoronavirus,Betacoronavirus Erinaceus/VMC/DEU/2012	-	KC545383,KC545386
Bettongia penicillata papillomavirus 1	NC_014143	vertebrates	1	Papillomaviridae,,Bettongia penicillata papillomavirus 1	-	GU220391
Blotched snakehead virus	NC_005982	vertebrates	1	Birnaviridae,Blosnavirus,Blotched snakehead virus	segment A	AJ459382
Blotched snakehead virus	NC_005983	vertebrates	1	Birnaviridae,Blosnavirus,Blotched snakehead virus	segment B	AJ459383
Bluegill picornavirus	NC_018506	vertebrates	1	Bluegill picornavirus	-	JX134222
Bocavirus gorilla/GBoV1/2009	NC_014358	vertebrates	1	Parvoviridae,Bocavirus,Bocavirus gorilla/GBoV1/2009	-	HM145750
Border disease virus	NC_003679	vertebrates	5	Flaviviridae,Pestivirus,Border disease virus	-	KC963426,KF925348,AF037405,GU270877,GQ902940
Border disease virus - BD31	NC_003679	vertebrates	1	Flaviviridae,Pestivirus,Border disease virus	-	U70263
Bos grunniens papillomavirus type 1	NC_001522	vertebrates	6	Papillomaviridae,Deltapapillomavirus,Deltapapillomavirus 4	-	JX174438,JX174439,JX174441,JX174442,JX174437,JX174440
Bottlenose dolphin coronavirus HKU22	NC_010646	vertebrates	3	Coronaviridae,Gammacoronavirus,Beluga Whale coronavirus SW1	-	KF793824,KF793825,KF793826
Bovine adeno-associated virus	NC_005889	vertebrates	1	Parvoviridae,Dependovirus,Bovine adeno-associated virus	-	AY388617
Bovine adenovirus 3	NC_001876	vertebrates	1	Adenoviridae,Mastadenovirus,Bovine adenovirus B	-	JN381195
Bovine adenovirus 6	NC_020074	vertebrates	1	Adenoviridae,Atadenovirus,Bovine adenovirus E	-	JQ345700
Bovine adenovirus B	NC_001876	vertebrates	1	Adenoviridae,Mastadenovirus,Bovine adenovirus B	-	AF030154
Bovine adenovirus D	NC_002685	vertebrates	1	Adenoviridae,Atadenovirus,Bovine adenovirus D	-	AF036092
Bovine calicivirus	NC_002551	vertebrates	1	Caliciviridae,Vesivirus,Vesicular exanthema of swine virus	-	AJ011099
Bovine circovirus	NC_005148	vertebrates	1	Circoviridae,Circovirus,Porcine circovirus 2	-	AF109397
Bovine coronavirus	NC_010327,NC_007732,NC_005147,NC_003045	vertebrates	4	Coronaviridae,Betacoronavirus,Betacoronavirus 1	-	AF391542,AF220295,U00735,AB354579
Bovine coronavirus DB2	NC_010327,NC_007732,NC_005147,NC_003045	vertebrates	1	Coronaviridae,Betacoronavirus,Betacoronavirus 1	-	DQ811784
Bovine coronavirus E-AH187	NC_010327,NC_007732,NC_005147,NC_003045	vertebrates	1	Coronaviridae,Betacoronavirus,Betacoronavirus 1	-	EF424619
Bovine coronavirus E-AH187-TC	NC_010327,NC_007732,NC_005147,NC_003045	vertebrates	1	Coronaviridae,Betacoronavirus,Betacoronavirus 1	-	FJ938064
Bovine coronavirus E-AH65	NC_010327,NC_007732,NC_005147,NC_003045	vertebrates	1	Coronaviridae,Betacoronavirus,Betacoronavirus 1	-	EF424615
Bovine coronavirus E-AH65-TC	NC_010327,NC_007732,NC_005147,NC_003045	vertebrates	1	Coronaviridae,Betacoronavirus,Betacoronavirus 1	-	EF424616
Bovine coronavirus E-DB2-TC	NC_010327,NC_007732,NC_005147,NC_003045	vertebrates	1	Coronaviridae,Betacoronavirus,Betacoronavirus 1	-	FJ938063
Bovine coronavirus R-AH187	NC_010327,NC_007732,NC_005147,NC_003045	vertebrates	1	Coronaviridae,Betacoronavirus,Betacoronavirus 1	-	EF424620
Bovine coronavirus R-AH65	NC_010327,NC_007732,NC_005147,NC_003045	vertebrates	1	Coronaviridae,Betacoronavirus,Betacoronavirus 1	-	EF424617
Bovine coronavirus R-AH65-TC	NC_010327,NC_007732,NC_005147,NC_003045	vertebrates	1	Coronaviridae,Betacoronavirus,Betacoronavirus 1	-	EF424618
Bovine coronavirus isolate Alpaca	NC_010327,NC_007732,NC_005147,NC_003045	vertebrates	1	Coronaviridae,Betacoronavirus,Betacoronavirus 1	-	DQ915164
Bovine enterovirus	NC_001859	vertebrates	4	Picornaviridae,Enterovirus,Enterovirus E	-	DQ092769,DQ092771,DQ092792,DQ092793
Bovine enterovirus strain K2577	NC_001859	vertebrates	1	Picornaviridae,Enterovirus,Enterovirus E	-	AF123432
Bovine enterovirus strain SL305	NC_001859	vertebrates	1	Picornaviridae,Enterovirus,Enterovirus E	-	AF123433
Bovine enterovirus type 2	NC_021220	vertebrates	4	Picornaviridae,Enterovirus,Enterovirus F	-	HQ663846,AY508696,HQ917060,AY508697
Bovine foamy virus	NC_001831	vertebrates	4	Retroviridae,Spumavirus,Bovine foamy virus	-	U94514,JX307861,AY134750,JX307862
Bovine herpesvirus 1	NC_001847	vertebrates	1	Herpesviridae,Varicellovirus,Bovine herpesvirus 1	-	AJ004801
Bovine herpesvirus 4	NC_002665	vertebrates	2	Herpesviridae,Rhadinovirus,Bovine herpesvirus 4	-	AF318573,JN133502
Bovine herpesvirus 5	NC_005261	vertebrates	1	Herpesviridae,Varicellovirus,Bovine herpesvirus 5	-	AY261359
Bovine herpesvirus type 1.1	NC_001847	vertebrates	1	Herpesviridae,Varicellovirus,Bovine herpesvirus 1	-	JX898220
Bovine hungarovirus 1	NC_018668	vertebrates	1	Picornaviridae,Hunnivirus,Hunnivirus A	-	JQ941880
Bovine immunodeficiency virus	NC_001413	vertebrates	1	Retroviridae,Lentivirus,Bovine immunodeficiency virus	-	M32690
Bovine kobuvirus	NC_004421	vertebrates	1	Picornaviridae,Kobuvirus,Aichivirus B	-	AB084788
Bovine leukemia virus	NC_001414	vertebrates	9	Retroviridae,Deltaretrovirus,Bovine leukemia virus	-	AF033818,FJ914764,D00647,AF257515,HE967301,K02120,HE967303,EF600696,HE967302
Bovine papillomavirus - 1	NC_001522	vertebrates	1	Papillomaviridae,Deltapapillomavirus,Deltapapillomavirus 4	-	X02346
Bovine papillomavirus - 3	NC_004197	vertebrates	1	Papillomaviridae,Xipapillomavirus,Xipapillomavirus 1	-	AJ620207
Bovine papillomavirus - 4	NC_004197	vertebrates	1	Papillomaviridae,Xipapillomavirus,Xipapillomavirus 1	-	X05817
Bovine papillomavirus - 5	NC_004195	vertebrates	1	Papillomaviridae,Epsilonpapillomavirus,Epsilonpapillomavirus 1	-	AJ620206
Bovine papillomavirus - 6	NC_004197	vertebrates	1	Papillomaviridae,Xipapillomavirus,Xipapillomavirus 1	-	AJ620208
Bovine papillomavirus 3	NC_004197	vertebrates	1	Papillomaviridae,Xipapillomavirus,Xipapillomavirus 1	-	AF486184
Bovine papillomavirus 7	NC_007612	vertebrates	1	Papillomaviridae,,Bovine papillomavirus 7	-	DQ217793
Bovine papillomavirus 8	NC_004195	vertebrates	1	Papillomaviridae,Epsilonpapillomavirus,Epsilonpapillomavirus 1	-	DQ098913
Bovine papillomavirus BAA5-Japan	NC_004197	vertebrates	1	Papillomaviridae,Xipapillomavirus,Xipapillomavirus 1	-	EU360723
Bovine papillomavirus type 1	NC_001522	vertebrates	2	Papillomaviridae,Deltapapillomavirus,Deltapapillomavirus 4	-	JX678969,AB626705
Bovine papillomavirus type 10	NC_004197	vertebrates	2	Papillomaviridae,Xipapillomavirus,Xipapillomavirus 1	-	AB331651,KF017607
Bovine papillomavirus type 11	NC_004197	vertebrates	1	Papillomaviridae,Xipapillomavirus,Xipapillomavirus 1	-	AB543507
Bovine papillomavirus type 12	NC_004197	vertebrates	2	Papillomaviridae,Xipapillomavirus,Xipapillomavirus 1	-	JF834524,JF834523
Bovine papillomavirus type 13	NC_001522	vertebrates	1	Papillomaviridae,Deltapapillomavirus,Deltapapillomavirus 4	-	JQ798171
Bovine papillomavirus type 2	NC_001522	vertebrates	2	Papillomaviridae,Deltapapillomavirus,Deltapapillomavirus 4	-	M20219,KC878306
Bovine papillomavirus type 8-EB	NC_004195	vertebrates	1	Papillomaviridae,Epsilonpapillomavirus,Epsilonpapillomavirus 1	-	DQ098917
Bovine papillomavirus type 9	NC_004197	vertebrates	1	Papillomaviridae,Xipapillomavirus,Xipapillomavirus 1	-	AB331650
Bovine papular stomatitis virus	NC_005337	vertebrates	1	Poxviridae,Parapoxvirus,Bovine papular stomatitis virus	-	AY386265
Bovine parvovirus	NC_001540	vertebrates	1	Parvoviridae,Bocavirus,Bovine parvovirus	-	M14363
Bovine parvovirus - 2	NC_006259	vertebrates	1	Parvoviridae,Dependovirus,Bovine parvovirus - 2	-	AF406966
Bovine parvovirus-1	NC_001540	vertebrates	1	Parvoviridae,Bocavirus,Bovine parvovirus	-	DQ335247
Bovine polyomavirus	NC_001442	vertebrates	1	Polyomaviridae,Polyomavirus,Bovine polyomavirus	-	D13942
Bovine respiratory coronavirus AH187	NC_012948	vertebrates	1	Coronaviridae,,Bovine respiratory coronavirus AH187	-	FJ938065
Bovine respiratory coronavirus bovine/US/OH-440-TC/1996	NC_012949	vertebrates	1	Coronaviridae,,Bovine respiratory coronavirus bovine/US/OH-440-TC/1996	-	FJ938066
Bovine rhinitis B virus	NC_010354	vertebrates	1	Picornaviridae,Aphthovirus,Bovine rhinitis B virus	-	EU236594
Bovine viral diarrhea virus 1	NC_001461	vertebrates	17	Flaviviridae,Pestivirus,Bovine viral diarrhea virus 1	-	JX419397,U86599,AJ133739,KC963967,AF041040,KC757383,M31182,AJ133738,EF101530,KF772785,U86600,AF268278,DQ088995,JN400273,AF220247,JX419398,JQ799141
Bovine viral diarrhea virus 1 strain ZM-95	NC_001461	vertebrates	1	Flaviviridae,Pestivirus,Bovine viral diarrhea virus 1	-	AF526381
Bovine viral diarrhea virus 2	NC_002032	vertebrates	8	Flaviviridae,Pestivirus,Bovine viral diarrhea virus 2	-	AB567658,AF002227,GQ888686,FJ527854,AY149215,HQ258810,KC963968,AF145967
Bovine viral diarrhea virus 2-New York'93	NC_002032	vertebrates	1	Flaviviridae,Pestivirus,Bovine viral diarrhea virus 2	-	AF502399
Bovine viral diarrhea virus 3	NC_012812	vertebrates	8	Flaviviridae,Pestivirus,Bovine viral diarrhea virus 3	-	JX469119,JX985409,JQ612704,AB871953,KC297709,HQ231763,JQ612705,KC788748
Bovine viral diarrhea virus 3 Th/04_KhonKaen	NC_012812	vertebrates	1	Flaviviridae,Pestivirus,Bovine viral diarrhea virus 3	-	FJ040215
Bovine viral diarrhea virus VEDEVAC	NC_001461	vertebrates	1	Flaviviridae,Pestivirus,Bovine viral diarrhea virus 1	-	AJ585412
Bovine viral diarrhea virus strain Oregon C24V	NC_001461	vertebrates	1	Flaviviridae,Pestivirus,Bovine viral diarrhea virus 1	-	AF091605
Bovine viral diarrhea virus type 1a	NC_001461	vertebrates	3	Flaviviridae,Pestivirus,Bovine viral diarrhea virus 1	-	HQ174293,HQ174292,JN380080
Bovine viral diarrhea virus type 1b	NC_001461	vertebrates	6	Flaviviridae,Pestivirus,Bovine viral diarrhea virus 1	-	HQ174296,JN644055,JN380089,JN380088,JN704144,HQ174294
Breda virus	NC_007447	vertebrates	1	Coronaviridae,Torovirus,Bovine torovirus	-	AY427798
Broome virus	NC_014236	vertebrates	1	Reoviridae,Orthoreovirus,Broome virus	segment L1	GQ258977
Broome virus	NC_014237	vertebrates	1	Reoviridae,Orthoreovirus,Broome virus	segment L2	GQ258978
Broome virus	NC_014238	vertebrates	1	Reoviridae,Orthoreovirus,Broome virus	segment L3	GQ258979
Broome virus	NC_014239	vertebrates	1	Reoviridae,Orthoreovirus,Broome virus	segment M1	GQ258980
Broome virus	NC_014240	vertebrates	1	Reoviridae,Orthoreovirus,Broome virus	segment M2	GQ258981
Broome virus	NC_014241	vertebrates	1	Reoviridae,Orthoreovirus,Broome virus	segment M3	GQ258982
Broome virus	NC_014242	vertebrates	1	Reoviridae,Orthoreovirus,Broome virus	segment S1	GQ258983
Broome virus	NC_014243	vertebrates	1	Reoviridae,Orthoreovirus,Broome virus	segment S2	GQ258984
Broome virus	NC_014244	vertebrates	1	Reoviridae,Orthoreovirus,Broome virus	segment S3	GQ258985
Broome virus	NC_014245	vertebrates	1	Reoviridae,Orthoreovirus,Broome virus	segment S4	GQ258986
Budgerigar fledgling disease polyomavirus	NC_004764	vertebrates	14	Polyomaviridae,Polyomavirus,Budgerigar fledgling disease polyomavirus	-	AB453165,AF118150,AB453166,M20775,AB453162,GU452537,AB477106,AB453160,AB453161,FJ385773,AY672646,AB453159,AB453164,AB453163
Budgerigar fledgling disease virus - 1	NC_004764	vertebrates	1	Polyomaviridae,Polyomavirus,Budgerigar fledgling disease polyomavirus	-	AF241168
Budgerigar fledgling disease virus - 4	NC_004764	vertebrates	1	Polyomaviridae,Polyomavirus,Budgerigar fledgling disease polyomavirus	-	AF241169
Budgerigar fledgling disease virus - 5	NC_004764	vertebrates	1	Polyomaviridae,Polyomavirus,Budgerigar fledgling disease polyomavirus	-	AF241170
Butcherbird polyomavirus	NC_023008	vertebrates	1	Polyomaviridae,Polyomavirus,Butcherbird polyomavirus	-	KF360862
Calf-giraffe coronavirus US/OH3/2006	NC_010327,NC_007732,NC_005147,NC_003045	vertebrates	1	Coronaviridae,Betacoronavirus,Betacoronavirus 1	-	EF424624
Calicivirus isolate Allston 2008/US	NC_004542	vertebrates	1	Caliciviridae,,Canine calicivirus	-	GQ475302
Calicivirus isolate Allston 2009/US	NC_004542	vertebrates	1	Caliciviridae,,Canine calicivirus	-	GQ475301
Calicivirus isolate TCG	NC_006875	vertebrates	1	Caliciviridae,,Calicivirus isolate TCG	-	AB117797
Calicivirus pig/AB104/CAN	NC_012699	vertebrates	1	Caliciviridae,,St-Valerien swine virus	-	FJ355930
Calicivirus pig/AB90/CAN	NC_012699	vertebrates	1	Caliciviridae,,St-Valerien swine virus	-	FJ355928
Calicivirus pig/F15-10/CAN	NC_012699	vertebrates	1	Caliciviridae,,St-Valerien swine virus	-	FJ355929
Calicivirus pig/NC-WGP93C/USA/2009	NC_012699	vertebrates	1	Caliciviridae,,St-Valerien swine virus	-	GU592498
Calicivirus strain NB	NC_004064,NC_007916	vertebrates	1	Caliciviridae,Nebovirus,Newbury-1 virus	-	AY082891
California sea lion polyomavirus 1	NC_013796	vertebrates	1	Polyomaviridae,Polyomavirus,California sea lion polyomavirus 1	-	GQ331138
Callitrichine herpesvirus 3	NC_004367	vertebrates	1	Herpesviridae,Lymphocryptovirus,Callitrichine herpesvirus 3	-	AF319782
Camelpox virus	NC_003391	vertebrates	1	Poxviridae,Orthopoxvirus,Camelpox virus	-	AF438165
Camelpox virus CMS	NC_003391	vertebrates	1	Poxviridae,Orthopoxvirus,Camelpox virus	-	AY009089
Camelus dromedarius papillomavirus type 1	NC_015267	vertebrates	1	Papillomaviridae,Deltapapillomavirus,Camelus dromedarius papillomavirus type 1	-	HQ912790
Camelus dromedarius papillomavirus type 2	NC_015268	vertebrates	1	Papillomaviridae,Deltapapillomavirus,Camelus dromedarius papillomavirus type 2	-	HQ912791
Canary circovirus	NC_003410	vertebrates	1	Circoviridae,Circovirus,Canary circovirus	-	AJ301633
Canary polyomavirus	NC_017085	vertebrates	1	Polyomaviridae,Polyomavirus,Canary polyomavirus	-	GU345044
Canarypox virus	NC_005309	vertebrates	1	Poxviridae,Avipoxvirus,Canarypox virus	-	AY318871
Canine adenovirus	NC_001734	vertebrates	1	Adenoviridae,Mastadenovirus,Canine adenovirus A	-	Y07760
Canine adenovirus 1	NC_001734	vertebrates	1	Adenoviridae,Mastadenovirus,Canine adenovirus A	-	U55001
Canine adenovirus 2	NC_001734	vertebrates	1	Adenoviridae,Mastadenovirus,Canine adenovirus A	-	U77082
Canine bocavirus	NC_020499	vertebrates	5	Parvoviridae,Bocavirus,Canine bocavirus	-	JQ692588,JN648103,JQ692591,JQ692590,JQ692589
Canine calicivirus	NC_004542	vertebrates	1	Caliciviridae,,Canine calicivirus	-	AB070225
Canine circovirus	NC_020904	vertebrates	3	Circoviridae,Circovirus,Canine circovirus	-	KC241982,KC241983,KC241984
Canine coronavirus	NC_002306	vertebrates	4	Coronaviridae,Alphacoronavirus,Alphacoronavirus 1	-	GQ477367,JQ404409,JQ404410,JN856008
Canine kobuvirus 1	NC_001918	vertebrates	1	Picornaviridae,Kobuvirus,Aichivirus A	-	KC161964
Canine kobuvirus US-PC0082	NC_001918	vertebrates	1	Picornaviridae,Kobuvirus,Aichivirus A	-	JN088541
Canine minute virus	NC_004442	vertebrates	6	Parvoviridae,Bocavirus,Canine minute virus	-	FJ214110,AB518884,AF495467,AB518883,FJ899734,AB158475
Canine oral papillomavirus	NC_001619	vertebrates	2	Papillomaviridae,Lambdapapillomavirus,Lambdapapillomavirus 2	-	D55633,L22695
Canine papillomavirus 10	NC_016075	vertebrates	1	Papillomaviridae,,Canine papillomavirus 10	-	JF800657
Canine papillomavirus 11	NC_008297	vertebrates	1	Papillomaviridae,Chipapillomavirus,Chipapillomavirus 1	-	JF800658
Canine papillomavirus 12	NC_016074	vertebrates	1	Papillomaviridae,,Canine papillomavirus 9	-	JQ754321
Canine papillomavirus 14	NC_019852	vertebrates	1	Papillomaviridae,,Canine papillomavirus 14	-	JQ701802
Canine papillomavirus 2	NC_006564	vertebrates	1	Papillomaviridae,Taupapillomavirus,Taupapillomavirus 1	-	AY722648
Canine papillomavirus 3	NC_008297	vertebrates	1	Papillomaviridae,Chipapillomavirus,Chipapillomavirus 1	-	DQ295066
Canine papillomavirus 4	NC_010226	vertebrates	1	Papillomaviridae,Chipapillomavirus,Chipapillomavirus 2	-	EF584537
Canine papillomavirus 5	NC_008297	vertebrates	1	Papillomaviridae,Chipapillomavirus,Chipapillomavirus 1	-	FJ492743
Canine papillomavirus 7	NC_006564	vertebrates	1	Papillomaviridae,Taupapillomavirus,Taupapillomavirus 1	-	FJ492742
Canine papillomavirus 8	NC_016014	vertebrates	1	Papillomaviridae,,Canine papillomavirus 8	-	HQ262536
Canine papillomavirus 9	NC_016074	vertebrates	1	Papillomaviridae,,Canine papillomavirus 9	-	JF800656
Canine parvovirus	NC_001539	vertebrates	4	Parvoviridae,Parvovirus,Feline panleukopenia virus	-	EU310373,M19296,JN033694,D26079
Canine parvovirus 2b	NC_001539	vertebrates	1	Parvoviridae,Parvovirus,Feline panleukopenia virus	-	JQ268284
Canine picodicistrovirus	NC_021178	vertebrates	3	Picornaviridae,Dicipivirus,Cadicivirus A	-	JN819202,JN819203,JN819204
Canine picornavirus	NC_016964	vertebrates	1	Canine picornavirus	-	JN831356
Capra hircus papillomavirus type 1	NC_008032	vertebrates	1	Papillomaviridae,Phipapillomavirus,Phipapillomavirus 1	-	DQ091200
Capreolus capreolus papillomavirus 1	NC_011051	vertebrates	1	Papillomaviridae,Deltapapillomavirus,Deltapapillomavirus 5	-	EF680235
Caprine arthritis encephalitis virus	NC_001463	vertebrates	6	Retroviridae,Lentivirus,Caprine arthritis encephalitis virus	-	GQ381130,JF502416,M33677,AF322109,GU120138,AY900630
Caprine arthritis encephalitis virus Ov496	NC_001463	vertebrates	1	Retroviridae,Lentivirus,Caprine arthritis encephalitis virus	-	FJ195346
Caprine arthritis encephalitis virus Roccaverano	NC_001463	vertebrates	1	Retroviridae,Lentivirus,Caprine arthritis encephalitis virus	-	EU293537
Caprine kobuvirus	NC_023422	vertebrates	1	Picornaviridae,Kobuvirus,Caprine kobuvirus	-	KF793927
Cardioderma polyomavirus	NC_020067	vertebrates	1	Polyomaviridae,Polyomavirus,Cardioderma polyomavirus	-	JX520659
Cardiovirus BR/118/2006	NC_009448,NC_001366,NC_010810	vertebrates	1	Picornaviridae,Cardiovirus,Theilovirus	-	EU681177
Cardiovirus D/VI2223/2004	NC_009448,NC_001366,NC_010810	vertebrates	1	Picornaviridae,Cardiovirus,Theilovirus	-	EU681179
Cardiovirus D/VI2229/2004	NC_009448,NC_001366,NC_010810	vertebrates	1	Picornaviridae,Cardiovirus,Theilovirus	-	EU681176
Cardiovirus D/VI2273/2004	NC_009448,NC_001366,NC_010810	vertebrates	1	Picornaviridae,Cardiovirus,Theilovirus	-	EU681178
Caretta caretta papillomavirus 1	NC_011530	vertebrates	1	Papillomaviridae,Dyozetapapillomavirus,Dyozetapapillomavirus 1	-	EU493092
Carp picornavirus 1	NC_023162	vertebrates	1	Carp picornavirus 1	-	KF306267
Cas-Br-E murine leukemia virus	NC_001702,NC_001819,NC_001362,NC_001501	vertebrates	1	Retroviridae,Gammaretrovirus,Murine leukemia virus	-	X57540
Castor canadensis papillomavirus type 1	NC_023178	vertebrates	1	Papillomaviridae,,Castor canadensis papillomavirus type 1	-	KC020689
Caviid herpesvirus 2	NC_020231	vertebrates	2	Herpesviridae,,Caviid herpesvirus 2	-	AB592928,KC503762
Caviid herpesvirus 2 str. CIDMTR	NC_020231	vertebrates	1	Herpesviridae,,Caviid herpesvirus 2	-	HG531783
Cebus albifrons polyomavirus 1	NC_019854	vertebrates	1	Polyomaviridae,Polyomavirus,Cebus albifrons polyomavirus 1	-	JX159988
Cercopithecine herpesvirus 2	NC_006560	vertebrates	1	Herpesviridae,Simplexvirus,Cercopithecine herpesvirus 2	-	AY714813
Cercopithecine herpesvirus 5	NC_012783	vertebrates	2	Herpesviridae,Cytomegalovirus,Cercopithecine herpesvirus 5	-	FJ483968,FJ483969
Cercopithecine herpesvirus 9	NC_002686	vertebrates	1	Herpesviridae,Varicellovirus,Cercopithecine herpesvirus 9	-	AF275348
Chaerephon polyomavirus 1	NC_020065	vertebrates	1	Polyomaviridae,Polyomavirus,Chaerephon polyomavirus 1	-	JX520657
Chelonia mydas papillomavirus 1	NC_011530	vertebrates	1	Papillomaviridae,Dyozetapapillomavirus,Dyozetapapillomavirus 1	-	EU493091
Chicken anemia virus	NC_001427	vertebrates	52	Circoviridae,Gyrovirus,Chicken anemia virus	-	KF224936,DQ217400,KF224938,DQ124936,KF224935,AF311900,JX964755,DQ141673,KC414026,KF224929,AY999018,AY839944,KF224934,DQ217401,AJ297685,AB027470,KF224937,DQ141670,DQ141672,KF224926,AF311892,DQ141671,AF390102,EF176599,KF224931,U66304,AF390038,AY040632,JF507715,DQ124935,FJ172347,DQ991394,M55918,D10068,KF224933,DQ124934,A48606,AF285882,AB119448,L14767,KF224932,KF224928,JQ690762,AF395114,JX260426,U654…
Chicken astrovirus	NC_003790	vertebrates	1	Astroviridae,Avastrovirus,Chicken astrovirus	-	AB033998
Chimpanzee polyomavirus	NC_014743	vertebrates	3	Polyomaviridae,Polyomavirus,Chimpanzee polyomavirus	-	FR692336,FR692334,FR692335
Cimodo virus	NC_023420	vertebrates	1	Reoviridae,,Cimodo virus	segment 1	KF880772
Circovirus NGchicken38/NGA/2009	NC_002361	vertebrates	1	Circoviridae,Circovirus,Columbid circovirus	-	HQ738642
Citrus endogenous pararetrovirus	NC_023153	vertebrates	3	Retroviridae,,Citrus endogenous pararetrovirus	-	KF800045,KF800044,KF800043
Classical swine fever virus	NC_002657	vertebrates	59	Flaviviridae,Pestivirus,Classical swine fever virus	-	U45477,HQ148063,A47690,JQ268754,EU915211,GQ902941,KC851953,D49532,JX262391,AY775178,AY578687,AF099102,EU857642,AF333000,GU324242,L49347,AY259122,AF352565,GU233731,FJ529205,A16790,AF091507,GQ923951,AY646427,HQ380231,AX191158,EU789580,AF092448,D49533,AY382481,GU233733,EU497410,U45478,A77196,AY578688,X96550,AY568569,AY663656,AY367767,GU233732,GQ122383,HM237795,AF091661,AY805221,U90951,GU592790,JX218…
Classical swine fever virus - Alfort/187	NC_002657	vertebrates	1	Flaviviridae,Pestivirus,Classical swine fever virus	-	X87939
Classical swine fever virus - Alfort/Tuebingen	NC_002657	vertebrates	1	Flaviviridae,Pestivirus,Classical swine fever virus	-	J04358
Classical swine fever virus - Brescia	NC_002657	vertebrates	1	Flaviviridae,Pestivirus,Classical swine fever virus	-	M31768
Classical swine fever virus - C	NC_002657	vertebrates	1	Flaviviridae,Pestivirus,Classical swine fever virus	-	Z46258
Classical swine fever virus 39	NC_002657	vertebrates	1	Flaviviridae,Pestivirus,Classical swine fever virus	-	AF407339
Classical swine fever virus 96TD	NC_002657	vertebrates	1	Flaviviridae,Pestivirus,Classical swine fever virus	-	AY554397
Colobus guereza papillomavirus type 1	NC_004104	vertebrates	1	Papillomaviridae,Alphapapillomavirus,Alphapapillomavirus 14	-	GU014532
Columbid circovirus	NC_002361	vertebrates	16	Circoviridae,Circovirus,Columbid circovirus	-	DQ915950,DQ915959,EU840176,DQ915957,DQ090944,DQ090945,AF252610,DQ915958,AJ298230,JX901125,AJ298229,JN183455,DQ915961,DQ915962,DQ915956,DQ915960
Common chimpanzee papillomavirus 1	NC_001355	vertebrates	1	Papillomaviridae,Alphapapillomavirus,Alphapapillomavirus 10	-	AF020905
Common marmoset foamy virus	NC_001364	vertebrates	1	Retroviridae,Spumavirus,Simian foamy virus	-	GU356395
Common midwife toad ranavirus	NC_005946	vertebrates	1	Iridoviridae,Ranavirus,Frog virus 3	-	JQ231222
Common-moorhen coronavirus HKU21	NC_016996	vertebrates	1	Coronaviridae,Deltacoronavirus,Common-moorhen coronavirus HKU21	-	JQ065049
Cosavirus A	NC_012800	vertebrates	2	Picornaviridae,Cosavirus,Cosavirus A	-	FJ438902,GU968209
Cotia virus SPAn232	NC_016924	vertebrates	1	Poxviridae,,Cotia virus	-	HQ647181
Cottontail rabbit papillomavirus	NC_001541	vertebrates	4	Papillomaviridae,Kappapapillomavirus,Kappapapillomavirus 2	-	AJ404003,JF303889,AJ243287,K02708
Cowpox virus	NC_003663	vertebrates	34	Poxviridae,Orthopoxvirus,Cowpox virus	-	KC813499,HQ420896,KC813496,KC813500,KC813492,DQ437593,HQ420895,HQ420897,KC813505,X94355,HQ407377,KC813512,KC813501,KC813493,KC813494,HQ420894,HQ420899,HQ420900,KC813510,KC813491,KC813502,KC813495,KC813509,KC813511,AF482758,KC813503,HQ420893,KC813507,HQ420898,KC813506,KC813508,KC813504,KC813498,KC813497
Crocuta crocuta papillomavirus 1	NC_018575	vertebrates	1	Papillomaviridae,Lambdapapillomavirus,Crocuta crocuta papillomavirus 1	-	HQ585856
Crow polyomavirus	NC_007922	vertebrates	1	Polyomaviridae,Polyomavirus,Crow polyomavirus	-	DQ192570
Cyclovirus NGchicken15/NGA/2009	NC_014930	vertebrates	1	Circoviridae,,Cyclovirus NGchicken15/NGA/2009	-	HQ738644
Cyclovirus NGchicken8/NGA/2009	NC_014930	vertebrates	1	Circoviridae,,Cyclovirus NGchicken15/NGA/2009	-	HQ738643
Cyclovirus PKbeef23/PAK/2009	NC_014927	vertebrates	1	Circoviridae,,Cyclovirus PKgoat21/PAK/2009	-	HQ738634
Cyclovirus PKgoat11/PAK/2009	NC_014928	vertebrates	1	Circoviridae,,Cyclovirus PKgoat11/PAK/2009	-	HQ738636
Cyclovirus PKgoat21/PAK/2009	NC_014927	vertebrates	1	Circoviridae,,Cyclovirus PKgoat21/PAK/2009	-	HQ738635
Cyclovirus VN	NC_021707	vertebrates	8	Circoviridae,,Cyclovirus VN	-	KF031491,KF031469,KF031467,KF031471,KF031466,KF031465,KF031468,KF031470
Cyclovirus bat/USA/2009	NC_014929	vertebrates	1	Circoviridae,,Cyclovirus bat/USA/2009	-	HQ738637
Cynomolgus macaque cytomegalovirus strain Ottawa	NC_016154	vertebrates	1	Herpesviridae,Cytomegalovirus,Cynomolgus macaque cytomegalovirus strain Ottawa	-	JN227533
Cyprinid herpesvirus 1	NC_019491	vertebrates	1	Alloherpesviridae,Cyprinivirus,Cyprinid herpesvirus 1	-	JQ815363
Cyprinid herpesvirus 2	NC_019495	vertebrates	1	Alloherpesviridae,Cyprinivirus,Cyprinid herpesvirus 2	-	JQ815364
Cyprinid herpesvirus 3	NC_009127	vertebrates	3	Alloherpesviridae,Cyprinivirus,Cyprinid herpesvirus 3	-	DQ657948,AP008984,DQ177346
DG-75 Murine leukemia virus	NC_001702,NC_001819,NC_001362,NC_001501	vertebrates	1	Retroviridae,Gammaretrovirus,Murine leukemia virus	-	AF221065
Deer papillomavirus	NC_001523	vertebrates	1	Papillomaviridae,Deltapapillomavirus,Deltapapillomavirus 2	-	M11910
Deerpox virus W-1170-84	NC_006967	vertebrates	1	Poxviridae,Cervidpoxvirus,Deerpox virus W-1170-84	-	AY689437
Deerpox virus W-848-83	NC_006966	vertebrates	1	Poxviridae,Cervidpoxvirus,Deerpox virus W-848-83	-	AY689436
Delphinus delphis papillomavirus	NC_011109	vertebrates	1	Papillomaviridae,Upsilonpapillomavirus,Upsilonpapillomavirus 1	-	GU117620
Duck adenovirus 1	NC_001813	vertebrates	1	Adenoviridae,Atadenovirus,Duck adenovirus A	-	KF286430
Duck adenovirus A	NC_001813	vertebrates	1	Adenoviridae,Atadenovirus,Duck adenovirus A	-	Y09598
Duck astrovirus 1	NC_012437	vertebrates	5	Astroviridae,Avastrovirus,Duck astrovirus GII.A	-	JX439643,FJ919225,FJ919228,FJ919226,FJ919227
Duck astrovirus C-NGB	NC_012437	vertebrates	1	Astroviridae,Avastrovirus,Duck astrovirus GII.A	-	FJ434664
Duck circovirus	NC_005053,NC_007220,NC_006561	vertebrates	47	Circoviridae,Circovirus,Duck circovirus	-	KC460533,HG532019,GU131340,EU499309,EU344803,HM162348,EU022375,HM162351,KC460528,JX241046,EU344805,GU131343,JX241045,EU344804,EU499310,JQ740360,KC460530,HM162349,HM162352,KC460527,GU131341,JQ740361,KC460532,KC460526,KC460525,HM162347,KC460524,HM162345,KC460529,KF726087,JQ740362,KC460535,GU131342,EU499311,GQ423740,HM162353,GU014543,GQ423747,HM162350,JQ740363,EU344806,HM162346,KC460534,EU344802,EU0…
Duck coronavirus	NC_010800,NC_001451	vertebrates	1	Coronaviridae,Gammacoronavirus,Avian coronavirus	-	JF705860
Duck hepatitis A virus	NC_008250	vertebrates	13	Picornaviridae,Avihepatovirus,Duck hepatitis A virus	-	JX235698,JQ301467,GU066820,EU352805,HQ654774,GU066824,GU066825,GU066823,GU944671,GU066822,GU066819,KC893553,GU066821
Duck hepatitis A virus 1	NC_008250	vertebrates	30	Picornaviridae,Avihepatovirus,Duck hepatitis A virus	-	JF828983,JF828984,DQ249299,JF914945,JQ316452,JF828989,JF828992,JF828996,JF829000,KC904272,JF828985,JF828987,JF828998,JF828994,JF828986,JF828997,JF828991,JF828993,JF828982,JF828999,DQ226541,JQ031262,JF828990,JQ804521,JF828988,JF828995,JX390984,JQ804522,JX390982,JX390983
Duck hepatitis A virus 3	NC_008250	vertebrates	6	Picornaviridae,Avihepatovirus,Duck hepatitis A virus	-	DQ256132,KC993890,JQ409566,JF835025,JF914944,JX312194
Duck hepatitis B virus	NC_001344	vertebrates	43	Hepadnaviridae,Avihepadnavirus,Duck hepatitis B virus	-	DQ195079,AY494850,AF404406,AF047045,M60677,EU429326,X60213,JX469898,K01834,AY433937,X58567,HM043822,AY250904,AY250901,HQ214130,AY494851,X58568,X58569,AF493986,M32990,X74623,AY294028,EU429324,JX469896,AY250902,AY392760,AY294656,HQ132730,AJ006350,M32991,HM590411,DQ276978,M21953,AY536371,AF505512,AY521226,AY294029,AY521227,HQ328779,X12798,JX469897,EU429325,AY250903
Duck hepatitis virus 1	NC_008250	vertebrates	44	Picornaviridae,Avihepatovirus,Duck hepatitis A virus	-	FJ157172,FJ157179,EU395435,EU888310,FJ436047,FJ157173,EU841005,DQ864514,FJ157174,EU371557,FJ496339,EU395436,FJ496344,DQ249301,EU395439,EF585200,EF427899,EF151312,EU395438,EU264072,FJ496341,EF382778,FJ157177,EF151313,FJ496340,FJ157176,DQ219396,EU877916,EU395440,GQ130377,FJ496343,EF427900,EF093502,DQ886445,FJ157178,FJ496342,EU747874,FJ157175,EU753359,FJ971623,EU395437,FJ157180,EF417871,DQ249300
Duck hepatitis virus 1 strain 04G	NC_008250	vertebrates	1	Picornaviridae,Avihepatovirus,Duck hepatitis A virus	-	EF067923
Duck hepatitis virus 1 strain 90D	NC_008250	vertebrates	1	Picornaviridae,Avihepatovirus,Duck hepatitis A virus	-	EF067924
Duck hepatitis virus AP-04009	NC_008250	vertebrates	1	Picornaviridae,Avihepatovirus,Duck hepatitis A virus	-	DQ256133
Duck hepatitis virus AP-04203	NC_008250	vertebrates	1	Picornaviridae,Avihepatovirus,Duck hepatitis A virus	-	DQ256134
Duck hepatitis virus DHV-HS	NC_008250	vertebrates	1	Picornaviridae,Avihepatovirus,Duck hepatitis A virus	-	DQ812094
Duck hepatitis virus DHV-HSS	NC_008250	vertebrates	1	Picornaviridae,Avihepatovirus,Duck hepatitis A virus	-	DQ812092
Duck hepatitis virus FC64/CHN/2009	NC_008250	vertebrates	1	Picornaviridae,Avihepatovirus,Duck hepatitis A virus	-	HQ232302
Duck hepatitis virus G	NC_008250	vertebrates	1	Picornaviridae,Avihepatovirus,Duck hepatitis A virus	-	EU755009
Duck hepatitis virus GD	NC_008250	vertebrates	1	Picornaviridae,Avihepatovirus,Duck hepatitis A virus	-	GQ122332
Duck hepatitis virus SD01	NC_008250	vertebrates	1	Picornaviridae,Avihepatovirus,Duck hepatitis A virus	-	GQ485310
Duck hepatitis virus SD02	NC_008250	vertebrates	1	Picornaviridae,Avihepatovirus,Duck hepatitis A virus	-	GQ485311
Duck hepatitis virus YYF-2008	NC_008250	vertebrates	1	Picornaviridae,Avihepatovirus,Duck hepatitis A virus	-	DQ812093
Duck reovirus	NC_015126	vertebrates	3	Reoviridae,Orthoreovirus,Avian orthoreovirus	segment L1	KF154110,KC493572,JX478250
Duck reovirus	NC_015127	vertebrates	3	Reoviridae,Orthoreovirus,Avian orthoreovirus	segment L2	KF154111,JX478251,KC493573
Duck reovirus	NC_015128	vertebrates	3	Reoviridae,Orthoreovirus,Avian orthoreovirus	segment L3	KF154112,KC493574,JX478252
Duck reovirus	NC_015129	vertebrates	3	Reoviridae,Orthoreovirus,Avian orthoreovirus	segment M1	KF154113,JX478253,JX440513
Duck reovirus	NC_015130	vertebrates	3	Reoviridae,Orthoreovirus,Avian orthoreovirus	segment M2	KF154114,JX478254,JX440514
Duck reovirus	NC_015131	vertebrates	3	Reoviridae,Orthoreovirus,Avian orthoreovirus	segment M3	JX478255,JX440512,KF154115
Duck reovirus	NC_015132	vertebrates	1	Reoviridae,Orthoreovirus,Avian orthoreovirus	segment S1	KF689545
Duck reovirus	NC_015133	vertebrates	8	Reoviridae,Orthoreovirus,Avian orthoreovirus	segment S2	JX852430,KF154117,JX852432,JX852431,JX852434,JQ863359,JX852433,JX478257
Duck reovirus	NC_015134	vertebrates	8	Reoviridae,Orthoreovirus,Avian orthoreovirus	segment S3	KF154118,JX826588,KF163096,KF163098,JX478258,KF163097,KF163099,KF163095
Duck reovirus	NC_015135	vertebrates	9	Reoviridae,Orthoreovirus,Avian orthoreovirus	segment S4	JX826589,KF163100,KF163104,KF163102,JX478259,KF154119,KF163103,JQ922269,KF163101
Duck reovirus NP03/CHN/2009	NC_015126	vertebrates	1	Reoviridae,Orthoreovirus,Avian orthoreovirus	segment L1	KC312700
Duck reovirus NP03/CHN/2009	NC_015127	vertebrates	1	Reoviridae,Orthoreovirus,Avian orthoreovirus	segment L2	KC312701
Duck reovirus NP03/CHN/2009	NC_015128	vertebrates	1	Reoviridae,Orthoreovirus,Avian orthoreovirus	segment L3	KC312702
Ectromelia virus	NC_004105	vertebrates	2	Poxviridae,Orthopoxvirus,Ectromelia virus	-	JQ410350,AF012825
Eel picornavirus 1	NC_022332	vertebrates	1	Picornaviridae,,Eel picornavirus 1	-	KC843627
Eel virus European X	NC_022581	vertebrates	1	Rhabdoviridae,Perhabdovirus,Anguillid rhabdovirus	-	FN557213
Eidolon helvum parvovirus 1	NC_016744	vertebrates	1	Parvoviridae,,Eidolon helvum parvovirus 1	-	JQ037753
Eidolon polyomavirus 1	NC_020068	vertebrates	1	Polyomaviridae,Polyomavirus,Eidolon polyomavirus 1	-	JX520660
Elephant endotheliotropic herpesvirus 1A	NC_020474	vertebrates	1	Herpesviridae,Proboscivirus,Elephantid herpesvirus 1	-	KC618527
Elephantid herpesvirus 1	NC_020474	vertebrates	2	Herpesviridae,Proboscivirus,Elephantid herpesvirus 1	-	KC462165,KC462164
Encephalomyocarditis virus	NC_001479	vertebrates	16	Picornaviridae,Cardiovirus,Encephalomyocarditis virus	-	M37588,AY296731,KF293299,FJ897755,EU780149,X87335,DQ288856,M22458,M22457,EU780148,AF356822,X74312,DQ464062,KF709977,M81861,DQ464063
Endogenous mouse mammary tumor virus Mtv1	NC_001503	vertebrates	1	Retroviridae,Betaretrovirus,Mouse mammary tumor virus	-	AF228550
Enterovirus 103	NC_010415	vertebrates	1	Picornaviridae,Enterovirus,Enterovirus J	-	FJ007373
Enterovirus 103	NC_013695	vertebrates	1	Picornaviridae,Enterovirus,Enterovirus J	-	FJ007373
Enterovirus E	NC_001859	vertebrates	1	Picornaviridae,Enterovirus,Enterovirus E	-	D00214
Enterovirus E	NC_021220	vertebrates	2	Picornaviridae,Enterovirus,Enterovirus F	-	DQ092795,DQ092794
Enterovirus F	NC_021220	vertebrates	2	Picornaviridae,Enterovirus,Enterovirus F	-	KC748420,DQ092770
Enterovirus J	NC_010415	vertebrates	1	Picornaviridae,Enterovirus,Enterovirus J	-	AF414372
Enterovirus J	NC_013695	vertebrates	2	Picornaviridae,Enterovirus,Enterovirus J	-	AF414372,AF414373
Enzootic nasal tumor virus	NC_007015	vertebrates	5	Retroviridae,Betaretrovirus,Ovine enzootic nasal tumor virus	-	FJ744146,FJ744150,FJ744148,FJ744147,FJ744149
Enzootic nasal tumour virus of goats	NC_004994	vertebrates	2	Retroviridae,Betaretrovirus,Enzootic nasal tumour virus of goats	-	HM104174,AY197548
Epinephelus tauvina nervous necrosis virus	NC_004136	vertebrates	2	Nodaviridae,Betanodavirus,Epinephelus tauvina nervous necrosis virus	segment RNA 2	AF281657,AF318942
Epinephelus tauvina nervous necrosis virus	NC_004137	vertebrates	2	Nodaviridae,Betanodavirus,Epinephelus tauvina nervous necrosis virus	segment RNA 1	AF326776,AF319555
Epsilonpapillomavirus 1	NC_004195	vertebrates	1	Papillomaviridae,Epsilonpapillomavirus,Epsilonpapillomavirus 1	-	AF457465
Equid herpesvirus 1	NC_001491	vertebrates	3	Herpesviridae,Varicellovirus,Equid herpesvirus 1	-	AP012321,AY665713,AY464052
Equid herpesvirus 2	NC_001650	vertebrates	1	Herpesviridae,Percavirus,Equid herpesvirus 2	-	U20824
Equid herpesvirus 4	NC_001844	vertebrates	1	Herpesviridae,Varicellovirus,Equid herpesvirus 4	-	AF030027
Equid herpesvirus 8	NC_017826	vertebrates	1	Herpesviridae,Varicellovirus,Equid herpesvirus 8	-	JQ343919
Equid herpesvirus 9	NC_011644	vertebrates	1	Herpesviridae,Varicellovirus,Equid herpesvirus 9	-	AP010838
Equine arteritis virus	NC_002532	vertebrates	33	Arteriviridae,Arterivirus,Equine arteritis virus	-	GQ903801,X53459,AY349168,GQ903807,JN211318,EU586274,EU252114,GQ903806,GQ903800,EU252113,GQ903798,GQ903805,GQ903811,JN211316,GQ903795,GQ903810,EU586275,GQ903804,GQ903809,GQ903802,A45589,JN211320,EU586273,AY349167,JN211319,JN211317,GQ903799,DQ846750,GQ903797,GQ903808,GQ903803,GQ903794,GQ903796
Equine coronavirus	NC_010327,NC_007732,NC_005147,NC_003045	vertebrates	1	Coronaviridae,Betacoronavirus,Betacoronavirus 1	-	EF446615
Equine foamy virus	NC_002201	vertebrates	1	Retroviridae,Spumavirus,Equine foamy virus	-	AF201902
Equine infectious anemia virus	NC_001450	vertebrates	26	Retroviridae,Lentivirus,Equine infectious anemia virus	-	M87581,U01866,HM141912,HM141917,HM141921,AF327877,HM141915,HM141918,HM141913,HM141919,AF327878,HM141914,JX003263,AF016316,HM141909,HM141922,AF028231,HM141920,AF033820,M16575,HM141911,HM141910,AF028232,HM141916,AF247394,HM141923
Equine papillomavirus 2	NC_012123	vertebrates	2	Papillomaviridae,Dyoiotapapillomavirus,Equine papillomavirus 2	-	EU503122,HM461973
Equine papillomavirus 3	NC_017862	vertebrates	1	Papillomaviridae,,Equine papillomavirus 3	-	GU384895
Equine papillomavirus type 6	NC_020500	vertebrates	1	Papillomaviridae,,Equine papillomavirus type 6	-	JQ965698
Equine pegivirus 1	NC_020902	vertebrates	1	Flaviviridae,Pegivirus,Equine pegivirus 1	-	KC410872
Equine polyomavirus	NC_017982	vertebrates	1	Polyomaviridae,Polyomavirus,Equine polyomavirus	-	JQ412134
Equine rhinitis A virus	NC_003982	vertebrates	8	Picornaviridae,Aphthovirus,Equine rhinitis A virus	-	DQ268580,DQ272128,DQ272577,X96870,DQ272127,JX294351,DQ272578,L43052
Equine rhinitis B virus 1	NC_003983	vertebrates	1	Picornaviridae,Erbovirus,Equine rhinitis B virus	-	X96871
Equine rhinitis B virus 2	NC_003983	vertebrates	1	Picornaviridae,Erbovirus,Equine rhinitis B virus	-	AF361253
Equus caballus papillomavirus 1	NC_003748	vertebrates	1	Papillomaviridae,Zetapapillomavirus,Zetapapillomavirus 1	-	AF498323
Equus ferus caballus papillomavirus type 4	NC_020085	vertebrates	1	Papillomaviridae,,Equus ferus caballus papillomavirus type 4	-	JQ031032
Equus ferus caballus papillomavirus type 5	NC_020084	vertebrates	1	Papillomaviridae,,Equus ferus caballus papillomavirus type 5	-	JQ031033
Equus ferus caballus papillomavirus type 7	NC_020501	vertebrates	1	Papillomaviridae,,Equus ferus caballus papillomavirus type 7	-	JX035935
Erethizon dorsatum papillomavirus type 1	NC_006951	vertebrates	1	Papillomaviridae,Sigmapapillomavirus,Sigmapapillomavirus 1	-	AY684126
Erinaceus europaeus papillomavirus	NC_011765	vertebrates	1	Papillomaviridae,Dyoetapapillomavirus,Dyoetapapillomavirus 1	-	FJ379293
Espirito Santo virus	NC_016517	vertebrates	1	Birnaviridae,,Espirito Santo virus	segment B	JN589002
Espirito Santo virus	NC_016518	vertebrates	1	Birnaviridae,,Espirito Santo virus	segment A	JN589003
European brown hare syndrome virus	NC_002615	vertebrates	3	Caliciviridae,Lagovirus,European brown hare syndrome virus	-	KC832838,KC832839,Z69620
European catfish virus	NC_017940	vertebrates	1	Iridoviridae,Ranavirus,European catfish virus	-	JQ724856
European elk papillomavirus	NC_001524	vertebrates	1	Papillomaviridae,Deltapapillomavirus,Deltapapillomavirus 1	-	M15953
Exogenous mouse mammary tumor virus	NC_001503	vertebrates	2	Retroviridae,Betaretrovirus,Mouse mammary tumor virus	-	AF228551,AF228552
FBR murine osteosarcoma virus	NC_001506	vertebrates	1	Retroviridae,Gammaretrovirus,Murine osteosarcoma virus	-	K02712
Fathead minnow picornavirus	NC_023437	vertebrates	1	Picornaviridae,,Fathead minnow picornavirus	-	KC465953
Felid herpesvirus 1	NC_013590	vertebrates	1	Herpesviridae,Varicellovirus,Felid herpesvirus 1	-	FJ478159
Feline astrovirus 2	NC_022249	vertebrates	1	Astroviridae,Mamastrovirus,Feline astrovirus 2	-	KF499111
Feline astrovirus Viseu	NC_022249	vertebrates	1	Astroviridae,Mamastrovirus,Feline astrovirus 2	-	KF374704
Feline bocavirus	NC_017823	vertebrates	3	Parvoviridae,Bocavirus,Feline bocavirus	-	JQ692586,JQ692585,JQ692587
Feline bocavirus 2	NC_022800	vertebrates	1	Parvoviridae,Bocavirus,Feline bocavirus 2	-	KF792837
Feline calicivirus	NC_001481	vertebrates	28	Caliciviridae,Vesivirus,Feline calicivirus	-	KC835209,AY560117,JX519213,JX519209,JN210884,JN210886,AY560118,M86379,L40021,JX519211,AY560113,JN210890,U13992,GU214989,JN210889,AY560114,JN210888,DQ424892,JX519214,JN210887,AY560116,AF479590,JN210885,JX519212,D31836,JX519210,AY560115,AF109465
Feline coronavirus	NC_002306	vertebrates	8	Coronaviridae,Alphacoronavirus,Alphacoronavirus 1	-	JQ408980,GQ152141,KF530123,DQ010921,JN634064,DQ286389,DQ848678,EU186072
Feline coronavirus RM	NC_002306	vertebrates	1	Coronaviridae,Alphacoronavirus,Alphacoronavirus 1	-	FJ938051
Feline coronavirus UU10	NC_002306	vertebrates	1	Coronaviridae,Alphacoronavirus,Alphacoronavirus 1	-	FJ938059
Feline coronavirus UU11	NC_002306	vertebrates	1	Coronaviridae,Alphacoronavirus,Alphacoronavirus 1	-	FJ938052
Feline coronavirus UU15	NC_002306	vertebrates	1	Coronaviridae,Alphacoronavirus,Alphacoronavirus 1	-	FJ938057
Feline coronavirus UU16	NC_002306	vertebrates	1	Coronaviridae,Alphacoronavirus,Alphacoronavirus 1	-	FJ938058
Feline coronavirus UU17	NC_002306	vertebrates	1	Coronaviridae,Alphacoronavirus,Alphacoronavirus 1	-	HQ012367
Feline coronavirus UU18	NC_002306	vertebrates	1	Coronaviridae,Alphacoronavirus,Alphacoronavirus 1	-	HQ012368
Feline coronavirus UU19	NC_002306	vertebrates	1	Coronaviridae,Alphacoronavirus,Alphacoronavirus 1	-	HQ392470
Feline coronavirus UU2	NC_002306	vertebrates	1	Coronaviridae,Alphacoronavirus,Alphacoronavirus 1	-	FJ938060
Feline coronavirus UU20	NC_002306	vertebrates	1	Coronaviridae,Alphacoronavirus,Alphacoronavirus 1	-	HQ392471
Feline coronavirus UU21	NC_002306	vertebrates	1	Coronaviridae,Alphacoronavirus,Alphacoronavirus 1	-	HQ012369
Feline coronavirus UU22	NC_002306	vertebrates	1	Coronaviridae,Alphacoronavirus,Alphacoronavirus 1	-	GU553361
Feline coronavirus UU23	NC_002306	vertebrates	1	Coronaviridae,Alphacoronavirus,Alphacoronavirus 1	-	GU553362
Feline coronavirus UU24	NC_002306	vertebrates	1	Coronaviridae,Alphacoronavirus,Alphacoronavirus 1	-	HQ012370
Feline coronavirus UU3	NC_002306	vertebrates	1	Coronaviridae,Alphacoronavirus,Alphacoronavirus 1	-	FJ938061
Feline coronavirus UU30	NC_002306	vertebrates	1	Coronaviridae,Alphacoronavirus,Alphacoronavirus 1	-	HQ392472
Feline coronavirus UU31	NC_002306	vertebrates	1	Coronaviridae,Alphacoronavirus,Alphacoronavirus 1	-	HQ012371
Feline coronavirus UU34	NC_002306	vertebrates	1	Coronaviridae,Alphacoronavirus,Alphacoronavirus 1	-	HQ012372
Feline coronavirus UU4	NC_002306	vertebrates	1	Coronaviridae,Alphacoronavirus,Alphacoronavirus 1	-	FJ938054
Feline coronavirus UU40	NC_002306	vertebrates	1	Coronaviridae,Alphacoronavirus,Alphacoronavirus 1	-	HQ392469
Feline coronavirus UU47	NC_002306	vertebrates	1	Coronaviridae,Alphacoronavirus,Alphacoronavirus 1	-	JN183882
Feline coronavirus UU5	NC_002306	vertebrates	1	Coronaviridae,Alphacoronavirus,Alphacoronavirus 1	-	FJ938056
Feline coronavirus UU54	NC_002306	vertebrates	1	Coronaviridae,Alphacoronavirus,Alphacoronavirus 1	-	JN183883
Feline coronavirus UU7	NC_002306	vertebrates	1	Coronaviridae,Alphacoronavirus,Alphacoronavirus 1	-	FJ938053
Feline coronavirus UU8	NC_002306	vertebrates	1	Coronaviridae,Alphacoronavirus,Alphacoronavirus 1	-	FJ938055
Feline coronavirus UU9	NC_002306	vertebrates	1	Coronaviridae,Alphacoronavirus,Alphacoronavirus 1	-	FJ938062
Feline foamy virus	NC_001871	vertebrates	8	Retroviridae,Spumavirus,Feline foamy virus	-	AJ564746,KC292055,U85043,AJ223851,KC292054,AB052797,Y08851,AJ564745
Feline immunodeficiency virus	NC_001482	vertebrates	27	Retroviridae,Lentivirus,Feline immunodeficiency virus	-	EF455611,EF455612,EF455609,EU117991,EF455608,EF455603,M36968,AY713445,EU117992,M25381,AY600517,X57002,U56928,AF474246,DQ192583,EF455607,DD029017,EF455606,EF455614,E43300,EF455613,EF455615,EF455610,EF455605,M59418,U11820,EF455604
Feline infectious peritonitis virus	NC_002306	vertebrates	5	Coronaviridae,Alphacoronavirus,Alphacoronavirus 1	-	JQ408981,KC461236,KC461237,KC461235,AY994055
Feline leukemia virus	NC_001940	vertebrates	3	Retroviridae,Gammaretrovirus,Feline leukemia virus	-	AB060732,M18247,AF052723
Feline papillomavirus	NC_004765	vertebrates	1	Papillomaviridae,Lambdapapillomavirus,Lambdapapillomavirus 1	-	AF377865
Feline picornavirus	NC_016156	vertebrates	5	Picornaviridae,,Feline picornavirus	-	JN572118,JN572117,JN572116,JN572115,JN572119
Feline sakobuvirus A	NC_022802	vertebrates	1	Picornaviridae,,Feline sakobuvirus A	-	KF387721
Felis catus papillomavirus 4	NC_022373	vertebrates	1	Papillomaviridae,Taupapillomavirus,Felis catus papillomavirus 4	-	KF147892
Felis catus papillomavirus-3	NC_021472	vertebrates	1	Papillomaviridae,Taupapillomavirus,Felis catus papillomavirus 3	-	JX972168
Felis domesticus papillomavirus type 1	NC_004765	vertebrates	1	Papillomaviridae,Lambdapapillomavirus,Lambdapapillomavirus 1	-	AF480454
Ferret papillomavirus	NC_022253	vertebrates	1	Papillomaviridae,,Ferret papillomavirus	-	KF006988
Finch circovirus	NC_008522	vertebrates	1	Circoviridae,Circovirus,Finch circovirus	-	DQ845075
Finch polyomavirus	NC_007923	vertebrates	1	Polyomaviridae,Polyomavirus,Finch polyomavirus	-	DQ192571
Florida woods cockroach-associated cyclovirus	NC_020206	vertebrates	1	Circoviridae,,Florida woods cockroach-associated cyclovirus	-	JX569794
Foot-and-mouth disease virus	NC_004004	vertebrates	8	Picornaviridae,Aphthovirus,Foot-and-mouth disease virus	-	AM503966,X00871,AM409190,AM503965,M10975,AJ007572,AJ007347,AF154271
Foot-and-mouth disease virus - type A	NC_004004	vertebrates	86	Picornaviridae,Aphthovirus,Foot-and-mouth disease virus	-	KC440881,HQ832576,AY593784,AY593802,HQ832585,HQ832579,HQ832582,JF749843,AY593770,AY593765,HQ832581,KC588943,AY593753,AY593788,AY593793,AY593803,HQ632773,AY593760,AY593774,AY593769,HQ832587,AY593776,AY593757,AY593751,AY593754,HQ832588,HQ832592,AY593780,AY593758,KC440882,X74812,JF749841,HQ832591,AY593779,JN006722,HQ832586,AY593783,AY593771,AY593759,AY593762,AY593772,HM854025,HM854023,HQ832583,HQ832…
Foot-and-mouth disease virus - type Asia 1	NC_004004	vertebrates	46	Picornaviridae,Aphthovirus,Foot-and-mouth disease virus	-	GU125646,AY593798,DQ989320,DQ989314,EF149009,DQ533483,DQ989312,DQ989308,DQ989319,DQ989311,DQ989309,KC462884,DQ989322,AY593796,DQ989307,DQ989310,EF149010,AY593799,HQ632774,GU125645,AY304994,DQ989317,DQ989303,JN006719,DQ989305,DQ989313,DQ989323,AY390432,DQ989316,AY593800,JF739177,DQ989315,JN006720,AY687333,DQ989306,HQ631363,DQ989318,GU931682,AY593795,FJ906802,DQ989321,AY687334,KC412634,EF614458,AY5…
Foot-and-mouth disease virus - type C	NC_004004	vertebrates	16	Picornaviridae,Aphthovirus,Foot-and-mouth disease virus	-	AF274010,AJ133358,DQ409184,AJ133357,AY593810,DQ409190,DQ409191,DQ409183,DQ409187,AM409325,AJ133359,DQ409186,DQ409189,DQ409185,FJ824812,DQ409188
Foot-and-mouth disease virus - type O	NC_004004	vertebrates	200	Picornaviridae,Aphthovirus,Foot-and-mouth disease virus	-	JX869181,DQ404158,JX040485,AJ320488,JX040491,KF501486,DQ404173,EU448380,JX869178,AY593833,JX570654,HM229661,AY593815,DQ404170,AF506822,FJ542369,KF694737,HQ632770,DQ404169,KF694738,JX570644,KF112889,EU448377,KF694743,EU448381,DQ404167,DQ404159,JX570647,JN998085,GU125648,AY593821,KF112888,JX040486,JX040490,KF694739,HQ268524,DQ404174,KF112883,AY593816,FJ542370,AJ539141,KF112887,FJ175666,AY593830,AJ5…
Foot-and-mouth disease virus - type SAT 1	NC_004004	vertebrates	10	Picornaviridae,Aphthovirus,Foot-and-mouth disease virus	-	AY593838,AY593845,AY593839,AY593841,AY593844,JF749860,AY593840,AY593843,AY593842,AY593846
Foot-and-mouth disease virus - type SAT 2	NC_004004	vertebrates	11	Picornaviridae,Aphthovirus,Foot-and-mouth disease virus	-	AY593849,JX014256,AF540910,JF749862,AY593848,KC440884,JF749861,AY593847,AJ251473,JF749864,JX014255
Foot-and-mouth disease virus - type SAT 3	NC_004004	vertebrates	4	Picornaviridae,Aphthovirus,Foot-and-mouth disease virus	-	AY593852,AY593851,AY593850,AY593853
Foot-and-mouth disease virus C1	NC_004004	vertebrates	2	Picornaviridae,Aphthovirus,Foot-and-mouth disease virus	-	AY593804,AY593805
Foot-and-mouth disease virus C3	NC_004004	vertebrates	2	Picornaviridae,Aphthovirus,Foot-and-mouth disease virus	-	AY593806,AY593807
Foot-and-mouth disease virus C4	NC_004004	vertebrates	1	Picornaviridae,Aphthovirus,Foot-and-mouth disease virus	-	AY593808
Foot-and-mouth disease virus C5	NC_004004	vertebrates	1	Picornaviridae,Aphthovirus,Foot-and-mouth disease virus	-	AY593809
Foot-and-mouth disease virus HKN/2002	NC_004004	vertebrates	1	Picornaviridae,Aphthovirus,Foot-and-mouth disease virus	-	AY317098
Foot-and-mouth disease virus O/ES/2001	NC_004004	vertebrates	1	Picornaviridae,Aphthovirus,Foot-and-mouth disease virus	-	AY686687
Foot-and-mouth disease virus O/SKR/2000	NC_004004	vertebrates	1	Picornaviridae,Aphthovirus,Foot-and-mouth disease virus	-	AF377945
Foot-and-mouth disease virus O/UKG/3952/2001	NC_004004	vertebrates	1	Picornaviridae,Aphthovirus,Foot-and-mouth disease virus	-	EF552688
Foot-and-mouth disease virus O/UKG/4014/2001	NC_004004	vertebrates	1	Picornaviridae,Aphthovirus,Foot-and-mouth disease virus	-	EF552693
Foot-and-mouth disease virus O/UKG/4141/2001	NC_004004	vertebrates	1	Picornaviridae,Aphthovirus,Foot-and-mouth disease virus	-	EF552689
Foot-and-mouth disease virus O/UKG/4998/2001	NC_004004	vertebrates	1	Picornaviridae,Aphthovirus,Foot-and-mouth disease virus	-	EF552694
Foot-and-mouth disease virus O/UKG/5470/2001	NC_004004	vertebrates	1	Picornaviridae,Aphthovirus,Foot-and-mouth disease virus	-	EF552696
Foot-and-mouth disease virus O/UKG/5681/2001	NC_004004	vertebrates	1	Picornaviridae,Aphthovirus,Foot-and-mouth disease virus	-	EF552697
Foot-and-mouth disease virus O/UKG/7039/2001	NC_004004	vertebrates	1	Picornaviridae,Aphthovirus,Foot-and-mouth disease virus	-	EF552690
Foot-and-mouth disease virus O/UKG/7299/2001	NC_004004	vertebrates	1	Picornaviridae,Aphthovirus,Foot-and-mouth disease virus	-	EF552692
Foot-and-mouth disease virus O/UKG/9161/2001	NC_004004	vertebrates	1	Picornaviridae,Aphthovirus,Foot-and-mouth disease virus	-	EF552691
Foot-and-mouth disease virus O/UKG/9443/2001	NC_004004	vertebrates	1	Picornaviridae,Aphthovirus,Foot-and-mouth disease virus	-	EF552695
Fowl adenovirus 5	NC_021221	vertebrates	1	Adenoviridae,Aviadenovirus,Fowl adenovirus B	-	KC493646
Fowl adenovirus A	NC_001720	vertebrates	1	Adenoviridae,Aviadenovirus,Fowl adenovirus A	-	U46933
Fowl adenovirus C	NC_015323	vertebrates	2	Adenoviridae,Aviadenovirus,Fowl adenovirus C	-	HE608152,GU188428
Fowl adenovirus D	NC_000899	vertebrates	1	Adenoviridae,Aviadenovirus,Fowl adenovirus D	-	AF083975
Fowl adenovirus E	NC_014969	vertebrates	1	Adenoviridae,Aviadenovirus,Fowl adenovirus E	-	GU734104
Fowlpox virus	NC_002188	vertebrates	1	Poxviridae,Avipoxvirus,Fowlpox virus	-	AF198100
Fowlpox virus (isolate HP-438[Munich])	NC_002188	vertebrates	1	Poxviridae,Avipoxvirus,Fowlpox virus	-	AJ581527
Francolinus leucoscepus papillomavirus 1	NC_013117	vertebrates	1	Papillomaviridae,Dyoepsilonpapillomavirus,Dyoepsilonpapillomavirus 1	-	EU188799
Friend murine leukemia virus	NC_001702,NC_001819,NC_001362,NC_001501	vertebrates	4	Retroviridae,Gammaretrovirus,Murine leukemia virus	-	D88386,X02794,A42090,M93134
Fringilla coelebs papillomavirus	NC_004068	vertebrates	1	Papillomaviridae,Etapapillomavirus,Etapapillomavirus 1	-	AY057109
Frog adenovirus 1	NC_002501	vertebrates	1	Adenoviridae,Siadenovirus,Frog adenovirus A	-	AF224336
Frog virus 3	NC_005946	vertebrates	1	Iridoviridae,Ranavirus,Frog virus 3	-	AY548484
Fujinami sarcoma virus	NC_001403	vertebrates	2	Retroviridae,Alpharetrovirus,Fujinami sarcoma virus	-	AF033810,J02194
GB virus A	NC_001837	vertebrates	3	Flaviviridae,Pegivirus,Pegivirus A	-	U22303,AF023425,AF023424
Gallid herpesvirus 1	NC_006623	vertebrates	21	Herpesviridae,Iltovirus,Gallid herpesvirus 1	-	JX458822,JN596962,JN580317,JN542533,JX646898,JN804826,JN580312,U80762,HQ630064,JN804827,JN580313,JX646899,JN580315,JN580314,JN542535,JQ083494,JN542534,JN596963,JQ083493,JN542536,JN580316
Gallid herpesvirus 2	NC_002229	vertebrates	14	Herpesviridae,Mardivirus,Gallid herpesvirus 2	-	AF147806,AF243438,JQ806362,JQ809692,AY510475,JQ836662,JQ820250,EU499381,JX844666,DQ530348,JQ809691,EF523390,JQ314003,JQ806361
Gallid herpesvirus 2 strain 814	NC_002229	vertebrates	1	Herpesviridae,Mardivirus,Gallid herpesvirus 2	-	JF742597
Gallid herpesvirus 3	NC_002577	vertebrates	2	Herpesviridae,Mardivirus,Gallid herpesvirus 3	-	AB049735,HQ840738
Gammapapillomavirus HPV127	NC_014469	vertebrates	1	Papillomaviridae,Gammapapillomavirus,Gammapapillomavirus HPV127	-	HM011570
Gibbon ape leukemia virus	NC_001885	vertebrates	2	Retroviridae,Gammaretrovirus,Gibbon ape leukemia virus	-	U60065,M26927
Giraffe coronavirus US/OH3-TC/2006	NC_010327,NC_007732,NC_005147,NC_003045	vertebrates	1	Coronaviridae,Betacoronavirus,Betacoronavirus 1	-	EF424622
Giraffe coronavirus US/OH3/2003	NC_010327,NC_007732,NC_005147,NC_003045	vertebrates	1	Coronaviridae,Betacoronavirus,Betacoronavirus 1	-	EF424623
Goatpox virus G20-LKV	NC_004003	vertebrates	1	Poxviridae,Capripoxvirus,Goatpox virus	-	AY077836
Goatpox virus Pellor	NC_004003	vertebrates	1	Poxviridae,Capripoxvirus,Goatpox virus	-	AY077835
Golden ide reovirus	NC_010588	vertebrates	1	Reoviridae,Aquareovirus,Aquareovirus G	segment 5	AF450324
Goose adenovirus 4	NC_017979	vertebrates	1	Adenoviridae,Aviadenovirus,Goose adenovirus A	-	JF510462
Goose circovirus	NC_003054	vertebrates	24	Circoviridae,Circovirus,Goose circovirus	-	DQ192283,DQ192279,AY633653,DQ192282,AF536933,GU320569,DQ192285,AF536934,AF536932,AF536939,AF536941,AF536940,AF536936,DQ192287,DQ192280,AJ304456,AF536935,AF536931,AF536938,AF536937,AF418552,DQ192281,DQ192286,DQ192284
Goose hemorrhagic polyomavirus	NC_004800	vertebrates	6	Polyomaviridae,Polyomavirus,Goose hemorrhagic polyomavirus	-	HQ681904,HQ681903,AY140894,HQ681905,JF304775,HQ681902
Goose orthoreovirus	NC_015126	vertebrates	1	Reoviridae,Orthoreovirus,Avian orthoreovirus	segment L1	JX145328
Goose orthoreovirus	NC_015127	vertebrates	1	Reoviridae,Orthoreovirus,Avian orthoreovirus	segment L2	JX145329
Goose orthoreovirus	NC_015128	vertebrates	1	Reoviridae,Orthoreovirus,Avian orthoreovirus	segment L3	JX145330
Goose orthoreovirus	NC_015129	vertebrates	1	Reoviridae,Orthoreovirus,Avian orthoreovirus	segment M1	JX145331
Goose orthoreovirus	NC_015130	vertebrates	1	Reoviridae,Orthoreovirus,Avian orthoreovirus	segment M2	JX145332
Goose orthoreovirus	NC_015131	vertebrates	1	Reoviridae,Orthoreovirus,Avian orthoreovirus	segment M3	JX145333
Goose orthoreovirus	NC_015132	vertebrates	1	Reoviridae,Orthoreovirus,Avian orthoreovirus	segment S1	JX145334
Goose orthoreovirus	NC_015133	vertebrates	1	Reoviridae,Orthoreovirus,Avian orthoreovirus	segment S2	JX145335
Goose orthoreovirus	NC_015134	vertebrates	1	Reoviridae,Orthoreovirus,Avian orthoreovirus	segment S3	JX145336
Goose orthoreovirus	NC_015135	vertebrates	1	Reoviridae,Orthoreovirus,Avian orthoreovirus	segment S4	JX145337
Goose parvovirus	NC_001701	vertebrates	12	Parvoviridae,Dependovirus,Goose parvovirus	-	EU583390,KC178571,EU583389,JF333590,KC184133,KC996730,U25749,EU583391,EU583392,KC996729,HQ891825,KC478066
Grass carp hemorrhagic virus	NC_005167	vertebrates	1	Reoviridae,Aquareovirus,Aquareovirus C	segment 2	AF284502
Grass carp hemorrhagic virus	NC_005168	vertebrates	1	Reoviridae,Aquareovirus,Aquareovirus C	segment 3	AF284503
Grass carp hemorrhagic virus	NC_005170	vertebrates	1	Reoviridae,Aquareovirus,Aquareovirus C	segment 5	AF251262
Grass carp hemorrhagic virus	NC_005171	vertebrates	1	Reoviridae,Aquareovirus,Aquareovirus C	segment 6	AF239175
Grass carp hemorrhagic virus	NC_005172	vertebrates	1	Reoviridae,Aquareovirus,Aquareovirus C	segment 7	AF239174
Grass carp hemorrhagic virus	NC_005174	vertebrates	1	Reoviridae,Aquareovirus,Aquareovirus C	segment 9	AF284504
Grass carp hemorrhagic virus	NC_005175	vertebrates	1	Reoviridae,Aquareovirus,Aquareovirus C	segment 10	AF236688
Grass carp hemorrhagic virus	NC_005176	vertebrates	1	Reoviridae,Aquareovirus,Aquareovirus C	segment 11	AF234321
Grass carp reovirus	NC_005166	vertebrates	4	Reoviridae,Aquareovirus,Aquareovirus C	segment 1	AF260511,GQ896334,KC847320,HQ231198
Grass carp reovirus	NC_005167	vertebrates	4	Reoviridae,Aquareovirus,Aquareovirus C	segment 2	HQ231199,AF260512,GQ896335,KC847321
Grass carp reovirus	NC_005168	vertebrates	4	Reoviridae,Aquareovirus,Aquareovirus C	segment 3	AF260513,HQ231200,GU350742,KC847322
Grass carp reovirus	NC_005169	vertebrates	4	Reoviridae,Aquareovirus,Aquareovirus C	segment 4	KC847323,HQ231201,GU350743,AF403390
Grass carp reovirus	NC_005170	vertebrates	4	Reoviridae,Aquareovirus,Aquareovirus C	segment 5	AF403391,GQ896336,HQ231202,KC847324
Grass carp reovirus	NC_005171	vertebrates	5	Reoviridae,Aquareovirus,Aquareovirus C	segment 6	JN206664,AF403392,GQ896337,KC847325,HQ231208
Grass carp reovirus	NC_005172	vertebrates	4	Reoviridae,Aquareovirus,Aquareovirus C	segment 7	HQ231203,AF403393,GU350744,KC847326
Grass carp reovirus	NC_005173	vertebrates	5	Reoviridae,Aquareovirus,Aquareovirus C	segment 8	AF403394,AF259053,GU350745,HQ231204,KC847327
Grass carp reovirus	NC_005174	vertebrates	4	Reoviridae,Aquareovirus,Aquareovirus C	segment 9	GU350746,KC847328,AF403395,HQ231205
Grass carp reovirus	NC_005175	vertebrates	5	Reoviridae,Aquareovirus,Aquareovirus C	segment 10	GU350747,HQ231206,KC847329,AF403396,JN206665
Grass carp reovirus	NC_005176	vertebrates	4	Reoviridae,Aquareovirus,Aquareovirus C	segment 11	KC847330,HQ231207,AF403397,GU350748
Ground squirrel hepatitis virus	NC_001484	vertebrates	1	Hepadnaviridae,Orthohepadnavirus,Ground squirrel hepatitis virus	-	K02715
Grouper iridovirus	NC_006549	vertebrates	1	Iridoviridae,Ranavirus,Singapore grouper iridovirus	-	AY666015
Gull circovirus	NC_008521	vertebrates	2	Circoviridae,Circovirus,Gull circovirus	-	DQ845074,JQ685854
Gyrovirus 4	NC_018401	vertebrates	1	Circoviridae,Gyrovirus,Gyrovirus 4	-	JX310702
Gyrovirus GyV3	NC_017091	vertebrates	1	Circoviridae,Gyrovirus,Gyrovirus GyV3	-	JQ308210
Gyrovirus Tu243	NC_022788	vertebrates	1	Circoviridae,Gyrovirus,Gyrovirus Tu243	-	KF294861
Gyrovirus Tu789	NC_022789	vertebrates	1	Circoviridae,Gyrovirus,Gyrovirus Tu789	-	KF294862
H-1 parvovirus	NC_001358	vertebrates	1	Parvoviridae,Parvovirus,H-1 parvovirus	-	X01457
HMO Astrovirus A	NC_013443	vertebrates	1	Astroviridae,Mamastrovirus,HMO Astrovirus A	-	GQ415660
Halastavi arva RNA virus	NC_016418	vertebrates	1	Halastavi arva RNA virus	-	JN000306
Hamster polyomavirus	NC_001663	vertebrates	8	Polyomaviridae,Polyomavirus,Hamster polyomavirus	-	JX036360,JX416850,M26281,X02449,JX416853,JX416852,JX416849,JX416851
Hepatitis A virus	NC_001489	vertebrates	77	Picornaviridae,Hepatovirus,Hepatitis A virus	-	AB839696,AY644337,EU526089,X75215,M20273,X75214,AB618529,FJ360733,AB839694,HQ437707,AB279732,EF406359,DQ991030,AB020565,KC182588,X75216,EF406363,AB793726,AB279734,EU251188,JQ655151,AB279733,AB258387,AB839692,AB839693,KC182589,EF406358,AF314208,DQ991029,FJ360731,HM769724,AB793725,EU011791,AB819870,K02990,AB020566,AB020568,FJ360734,KC182590,FJ360735,JQ425480,AY644670,EF207320,AF268396,KC182587,AF51…
Hepatitis GB virus B	NC_001655	vertebrates	10	Flaviviridae,,Hepatitis GB virus B	-	AB630364,AF179612,AB630361,AB630360,U22304,AB630359,AJ277947,AB630363,AB630362,AB630358
Heron hepatitis B virus	NC_001486	vertebrates	1	Hepadnaviridae,Avihepadnavirus,Heron hepatitis B virus	-	M22056
Hipposideros bat coronavirus HKU10	NC_018871	vertebrates	6	Coronaviridae,Alphacoronavirus,Bat coronavirus HKU10	-	JQ989266,JQ989272,JQ989269,JQ989273,JQ989267,JQ989268
Hirame rhabdovirus	NC_005093	vertebrates	2	Rhabdoviridae,Novirhabdovirus,Hirame rhabdovirus	-	AF104985,FJ376982
Human T-cell lymphotropic virus type 2b	NC_001815,NC_001488	vertebrates	1	Retroviridae,Deltaretrovirus,Primate T-lymphotropic virus 2	-	Y13051
Human T-lymphotropic virus 1	NC_000858,NC_001436	vertebrates	18	Retroviridae,Deltaretrovirus,Primate T-lymphotropic virus 1	-	JX891479,L36905,AF259264,J02029,HQ606138,D13784,JX891478,AF042071,AF139170,U19949,HQ606137,AY563954,AY563953,KC807984,L03561,L02534,AB513134,L03562
Human T-lymphotropic virus 2	NC_001815,NC_001488	vertebrates	10	Retroviridae,Deltaretrovirus,Primate T-lymphotropic virus 2	-	GU212854,AF074965,AF139382,L20734,AF326584,X89270,L11456,AF412314,AF326583,Y14365
Human T-lymphotropic virus 3	NC_003323	vertebrates	4	Retroviridae,Deltaretrovirus,Primate T-lymphotropic virus 3	-	EU649782,DQ093792,DQ462191,GQ463602
Human T-lymphotropic virus 4	NC_011800	vertebrates	1	Retroviridae,Deltaretrovirus,Human T-lymphotropic virus 4	-	EF488483
Human TMEV-like cardiovirus	NC_009448,NC_001366,NC_010810	vertebrates	1	Picornaviridae,Cardiovirus,Theilovirus	-	GU595289
Human adenovirus 4	NC_003266,NC_017825	vertebrates	6	Adenoviridae,Mastadenovirus,Human adenovirus E	-	AY594254,KF006344,AY594253,AY599837,AY599835,AY458656
Human adenovirus 41	NC_001454	vertebrates	3	Adenoviridae,Mastadenovirus,Human adenovirus F	-	DQ315364,AB728839,HM565136
Human adenovirus 52	NC_006879	vertebrates	1	Adenoviridae,Mastadenovirus,Human adenovirus G	-	DQ923122
Human adenovirus E	NC_003266,NC_017825	vertebrates	2	Adenoviridae,Mastadenovirus,Human adenovirus E	-	AY487947,EF371058
Human adenovirus F	NC_001454	vertebrates	1	Adenoviridae,Mastadenovirus,Human adenovirus F	-	L19443
Human betacoronavirus 2c EMC/2012	NC_019843	vertebrates	1	Coronaviridae,Betacoronavirus,Middle East respiratory syndrome coronavirus	-	JX869059
Human betacoronavirus 2c England-Qatar/2012	NC_019843	vertebrates	1	Coronaviridae,Betacoronavirus,Middle East respiratory syndrome coronavirus	-	KC667074
Human betacoronavirus 2c Jordan-N3/2012	NC_019843	vertebrates	1	Coronaviridae,Betacoronavirus,Middle East respiratory syndrome coronavirus	-	KC776174
Human bocavirus 4	NC_007018	vertebrates	1	Parvoviridae,Parvovirus,Human parvovirus 4	-	HQ113143
Human coronavirus OC43	NC_010327,NC_007732,NC_005147,NC_003045	vertebrates	6	Coronaviridae,Betacoronavirus,Betacoronavirus 1	-	AY903459,AY585229,AY585228,JN129835,JN129834,AY903460
Human cosavirus A2	NC_012800	vertebrates	1	Picornaviridae,Cosavirus,Cosavirus A	-	FJ438903
Human cosavirus B	NC_012801	vertebrates	1	Picornaviridae,Cosavirus,Human cosavirus B	-	FJ438907
Human cosavirus D	NC_012802	vertebrates	1	Picornaviridae,Cosavirus,Human cosavirus D	-	FJ438908
Human cosavirus E	NC_012798	vertebrates	1	Picornaviridae,Cosavirus,Human cosavirus E	-	FJ555055
Human cyclovirus VS5700009	NC_021568	vertebrates	1	Circoviridae,,Human cyclovirus VS5700009	-	KC771281
Human enteric coronavirus 4408	NC_010327,NC_007732,NC_005147,NC_003045	vertebrates	1	Coronaviridae,Betacoronavirus,Betacoronavirus 1	-	FJ415324
Human erythrovirus V9	NC_004295	vertebrates	1	Parvoviridae,Erythrovirus,Human erythrovirus V9	-	AJ249437
Human foamy virus	NC_001364	vertebrates	2	Retroviridae,Spumavirus,Simian foamy virus	-	Y07724,Y07725
Human gyrovirus type 1	NC_015630	vertebrates	1	Circoviridae,Gyrovirus,Human gyrovirus type 1	-	FR823283
Human herpesvirus 6A	NC_001664	vertebrates	2	Herpesviridae,Roseolovirus,Human herpesvirus 6A	-	KC465951,X83413
Human herpesvirus 6B	NC_000898	vertebrates	2	Herpesviridae,Roseolovirus,Human herpesvirus 6B	-	AB021506,AF157706
Human papillomavirus	NC_001457	vertebrates	1	Papillomaviridae,Gammapapillomavirus,Gammapapillomavirus 1	-	JX413107
Human papillomavirus	NC_012485	vertebrates	1	Papillomaviridae,Gammapapillomavirus,Gammapapillomavirus 7	-	JX413110
Human papillomavirus	NC_012486	vertebrates	1	Papillomaviridae,Gammapapillomavirus,Gammapapillomavirus 8	-	JX413106
Human papillomavirus	NC_014955	vertebrates	1	Papillomaviridae,Gammapapillomavirus,Human papillomavirus 132-like viruses	-	JX444072
Human papillomavirus - 1	NC_001356	vertebrates	1	Papillomaviridae,Mupapillomavirus,Mupapillomavirus 1	-	V01116
Human papillomavirus - 18	NC_001357	vertebrates	1	Papillomaviridae,Alphapapillomavirus,Alphapapillomavirus 7	-	X05015
Human papillomavirus - 2	NC_001352	vertebrates	1	Papillomaviridae,Alphapapillomavirus,Alphapapillomavirus 4	-	X55964
Human papillomavirus - 54	NC_001676	vertebrates	1	Papillomaviridae,Alphapapillomavirus,Alphapapillomavirus 13	-	AF436129
Human papillomavirus - 72	NC_001694	vertebrates	1	Papillomaviridae,Alphapapillomavirus,Alphapapillomavirus 3	-	X94164
Human papillomavirus - 81	NC_001694	vertebrates	1	Papillomaviridae,Alphapapillomavirus,Alphapapillomavirus 3	-	AJ620209
Human papillomavirus - 83	NC_001694	vertebrates	1	Papillomaviridae,Alphapapillomavirus,Alphapapillomavirus 3	-	AF151983
Human papillomavirus - cand62	NC_001694	vertebrates	1	Papillomaviridae,Alphapapillomavirus,Alphapapillomavirus 3	-	AY395706
Human papillomavirus - cand85	NC_001357	vertebrates	1	Papillomaviridae,Alphapapillomavirus,Alphapapillomavirus 7	-	AF131950
Human papillomavirus - cand86	NC_001694	vertebrates	1	Papillomaviridae,Alphapapillomavirus,Alphapapillomavirus 3	-	AF349909
Human papillomavirus - cand87	NC_001694	vertebrates	1	Papillomaviridae,Alphapapillomavirus,Alphapapillomavirus 3	-	AJ400628
Human papillomavirus - cand89	NC_001694	vertebrates	1	Papillomaviridae,Alphapapillomavirus,Alphapapillomavirus 3	-	AF436128
Human papillomavirus - cand91	NC_001595	vertebrates	1	Papillomaviridae,Alphapapillomavirus,Alphapapillomavirus 8	-	AF419318
Human papillomavirus 109	NC_012485	vertebrates	1	Papillomaviridae,Gammapapillomavirus,Gammapapillomavirus 7	-	EU541441
Human papillomavirus 112	NC_012486	vertebrates	1	Papillomaviridae,Gammapapillomavirus,Gammapapillomavirus 8	-	EU541442
Human papillomavirus 116	NC_013035	vertebrates	1	Papillomaviridae,Gammapapillomavirus,Gammapapillomavirus 9	-	FJ804072
Human papillomavirus 121	NC_014185	vertebrates	1	Papillomaviridae,Gammapapillomavirus,Gammapapillomavirus 10	-	GQ845443
Human papillomavirus 54	NC_001676	vertebrates	1	Papillomaviridae,Alphapapillomavirus,Alphapapillomavirus 13	-	U37488
Human papillomavirus 61	NC_001694	vertebrates	1	Papillomaviridae,Alphapapillomavirus,Alphapapillomavirus 3	-	U31793
Human papillomavirus SIBX9	NC_001576	vertebrates	1	Papillomaviridae,Alphapapillomavirus,Alphapapillomavirus 2	-	FN547152
Human papillomavirus type 10	NC_001576	vertebrates	1	Papillomaviridae,Alphapapillomavirus,Alphapapillomavirus 2	-	X74465
Human papillomavirus type 102	NC_001694	vertebrates	1	Papillomaviridae,Alphapapillomavirus,Alphapapillomavirus 3	-	DQ080083
Human papillomavirus type 106	NC_004104	vertebrates	1	Papillomaviridae,Alphapapillomavirus,Alphapapillomavirus 14	-	DQ080082
Human papillomavirus type 108	NC_012213,NC_008188,NC_008189	vertebrates	1	Papillomaviridae,Gammapapillomavirus,Gammapapillomavirus 6	-	FM212639
Human papillomavirus type 11	NC_001355	vertebrates	49	Papillomaviridae,Alphapapillomavirus,Alphapapillomavirus 10	-	FN907959,FN907964,HE574703,FN870021,HE611271,HE611263,HE611259,HE611273,HE962365,HE611264,JN644142,FN870022,HE611267,JQ773412,EU918768,HE611260,HE962023,HE574704,HE611268,HE962366,FN907963,M14119,JQ773409,HE574701,FN907961,JN644141,FN907957,FN907960,HE962024,HE611270,JQ773411,FR872717,HE611266,HE611274,HE574705,JQ773410,HE611272,HE611269,HE962368,HE611265,HE611258,FN907958,HE611261,JQ773408,HE962…
Human papillomavirus type 114	NC_001694	vertebrates	1	Papillomaviridae,Alphapapillomavirus,Alphapapillomavirus 3	-	GQ244463
Human papillomavirus type 117	NC_001576	vertebrates	1	Papillomaviridae,Alphapapillomavirus,Alphapapillomavirus 2	-	GQ246950
Human papillomavirus type 119	NC_012486	vertebrates	1	Papillomaviridae,Gammapapillomavirus,Gammapapillomavirus 8	-	GQ845441
Human papillomavirus type 123	NC_012485	vertebrates	1	Papillomaviridae,Gammapapillomavirus,Gammapapillomavirus 7	-	GQ845445
Human papillomavirus type 128	NC_014952	vertebrates	1	Papillomaviridae,Gammapapillomavirus,Human papillomavirus type 128	-	GU225708
Human papillomavirus type 129	NC_014953	vertebrates	1	Papillomaviridae,Gammapapillomavirus,Human papillomavirus type 129	-	GU233853
Human papillomavirus type 13	NC_001355	vertebrates	2	Papillomaviridae,Alphapapillomavirus,Alphapapillomavirus 10	-	X62843,DQ344807
Human papillomavirus type 130	NC_014185	vertebrates	1	Papillomaviridae,Gammapapillomavirus,Gammapapillomavirus 10	-	GU117630
Human papillomavirus type 131	NC_014954	vertebrates	1	Papillomaviridae,Gammapapillomavirus,Human papillomavirus type 131	-	GU117631
Human papillomavirus type 132	NC_014955	vertebrates	1	Papillomaviridae,Gammapapillomavirus,Human papillomavirus 132-like viruses	-	GU117632
Human papillomavirus type 133	NC_014185	vertebrates	1	Papillomaviridae,Gammapapillomavirus,Gammapapillomavirus 10	-	GU117633
Human papillomavirus type 134	NC_014956	vertebrates	1	Papillomaviridae,Gammapapillomavirus,Human papillomavirus type 134	-	GU117634
Human papillomavirus type 148	NC_014955	vertebrates	1	Papillomaviridae,Gammapapillomavirus,Human papillomavirus 132-like viruses	-	GU129016
Human papillomavirus type 149	NC_012485	vertebrates	1	Papillomaviridae,Gammapapillomavirus,Gammapapillomavirus 7	-	GU117629
Human papillomavirus type 16	NC_001526	vertebrates	119	Papillomaviridae,Alphapapillomavirus,Alphapapillomavirus 9	-	HQ644258,HQ644259,HQ644243,AB818687,JQ004097,HQ644262,HQ644298,FJ610149,HQ644249,FJ610152,HQ644264,AB889490,HQ644263,AF536179,HQ644283,HQ644292,HQ644261,HQ644273,AY686580,HQ644296,JQ004096,AB818688,AB818690,JQ004094,AF472509,FJ610146,JN565302,HQ644239,AB889492,HQ644240,HQ644250,HQ644286,HQ644269,HQ644278,HQ644280,HQ644288,FJ610151,HQ644294,HQ644248,HQ644241,HQ644238,HQ644236,HQ644265,HQ644287,HQ6…
Human papillomavirus type 167	NC_022892	vertebrates	1	Papillomaviridae,Gammapapillomavirus,Human papillomavirus type 167	-	KC862318
Human papillomavirus type 168	NC_012486	vertebrates	1	Papillomaviridae,Gammapapillomavirus,Gammapapillomavirus 8	-	KC862317
Human papillomavirus type 18	NC_001357	vertebrates	46	Papillomaviridae,Alphapapillomavirus,Alphapapillomavirus 7	-	GQ180792,EF202155,EF202149,EF202148,KC470211,KC470216,EF202150,KC470230,EF202153,GQ180788,KC470214,GQ180786,KC470221,KC470218,KC470228,GQ180784,KC470227,KC470229,KC470226,KC470217,KC470213,GQ180790,KC470209,GQ180791,EF202143,EF202145,GQ180789,KC470222,KC470215,KC470220,EF202152,EF202154,AY262282,EF202151,KC470225,GQ180787,EF202147,GQ180785,KC470212,KC470219,KC470210,EF202144,KC470223,EF202146,KC4…
Human papillomavirus type 1a	NC_001356	vertebrates	1	Papillomaviridae,Mupapillomavirus,Mupapillomavirus 1	-	U06714
Human papillomavirus type 2	NC_001352	vertebrates	4	Papillomaviridae,Alphapapillomavirus,Alphapapillomavirus 4	-	EF362755,EF362754,EF117891,EF117890
Human papillomavirus type 26	NC_001583	vertebrates	1	Papillomaviridae,Alphapapillomavirus,Alphapapillomavirus 5	-	X74472
Human papillomavirus type 27	NC_001352	vertebrates	1	Papillomaviridae,Alphapapillomavirus,Alphapapillomavirus 4	-	X74473
Human papillomavirus type 27b	NC_001352	vertebrates	1	Papillomaviridae,Alphapapillomavirus,Alphapapillomavirus 4	-	AB211993
Human papillomavirus type 28	NC_001576	vertebrates	1	Papillomaviridae,Alphapapillomavirus,Alphapapillomavirus 2	-	U31783
Human papillomavirus type 29	NC_001576	vertebrates	1	Papillomaviridae,Alphapapillomavirus,Alphapapillomavirus 2	-	U31784
Human papillomavirus type 3	NC_001576	vertebrates	1	Papillomaviridae,Alphapapillomavirus,Alphapapillomavirus 2	-	X74462
Human papillomavirus type 30	NC_001593	vertebrates	1	Papillomaviridae,Alphapapillomavirus,Alphapapillomavirus 6	-	X74474
Human papillomavirus type 31	NC_001526	vertebrates	23	Papillomaviridae,Alphapapillomavirus,Alphapapillomavirus 9	-	J04353,HQ537667,HQ537678,HQ537674,HQ537669,HQ537668,HQ537679,HQ537670,HQ537671,HQ537681,HQ537673,HQ537687,HQ537666,HQ537677,HQ537685,HQ537682,HQ537683,HQ537680,HQ537672,HQ537676,HQ537675,HQ537684,HQ537686
Human papillomavirus type 32	NC_001586	vertebrates	1	Papillomaviridae,Alphapapillomavirus,Alphapapillomavirus 1	-	X74475
Human papillomavirus type 33	NC_001526	vertebrates	23	Papillomaviridae,Alphapapillomavirus,Alphapapillomavirus 9	-	HQ537706,HQ537702,HQ537701,HQ537698,M12732,HQ537694,HQ537696,HQ537707,HQ537692,HQ537688,HQ537697,HQ537689,HQ537703,EU918766,HQ537693,HQ537700,HQ537704,HQ537690,HQ537691,HQ537695,HQ537699,HQ537705,A12360
Human papillomavirus type 34	NC_001587	vertebrates	1	Papillomaviridae,Alphapapillomavirus,Alphapapillomavirus 11	-	X74476
Human papillomavirus type 35	NC_001526	vertebrates	28	Papillomaviridae,Alphapapillomavirus,Alphapapillomavirus 9	-	HQ537725,HQ537708,HQ537715,HQ537730,HQ537711,HQ537726,JX129488,HQ537720,HQ537718,HQ537713,HQ537717,HQ537729,HQ537723,HQ537714,HQ537722,M74117,HQ537710,HQ537716,HQ537719,JX129486,HQ537728,HQ537721,HQ537712,HQ537727,HQ537709,HQ537724,JX129487,JX129485
Human papillomavirus type 35H	NC_001526	vertebrates	1	Papillomaviridae,Alphapapillomavirus,Alphapapillomavirus 9	-	X74477
Human papillomavirus type 39	NC_001357	vertebrates	20	Papillomaviridae,Alphapapillomavirus,Alphapapillomavirus 7	-	KC470243,KC470238,KC470239,KC470240,KC470247,KC470231,KC470241,KC470236,M62849,KC470242,KC470232,KC470244,KC470246,KC470237,KC470235,KC470249,KC470234,KC470245,KC470248,KC470233
Human papillomavirus type 4	NC_001457	vertebrates	1	Papillomaviridae,Gammapapillomavirus,Gammapapillomavirus 1	-	X70827
Human papillomavirus type 40	NC_001595	vertebrates	1	Papillomaviridae,Alphapapillomavirus,Alphapapillomavirus 8	-	X74478
Human papillomavirus type 41	NC_001354	vertebrates	1	Papillomaviridae,Nupapillomavirus,Nupapillomavirus 1	-	X56147
Human papillomavirus type 42	NC_001586	vertebrates	3	Papillomaviridae,Alphapapillomavirus,Alphapapillomavirus 1	-	GQ472847,A28090,M73236
Human papillomavirus type 43	NC_001595	vertebrates	1	Papillomaviridae,Alphapapillomavirus,Alphapapillomavirus 8	-	AJ620205
Human papillomavirus type 44	NC_001355	vertebrates	1	Papillomaviridae,Alphapapillomavirus,Alphapapillomavirus 10	-	U31788
Human papillomavirus type 45	NC_001357	vertebrates	24	Papillomaviridae,Alphapapillomavirus,Alphapapillomavirus 7	-	EF202158,EF202157,KC470251,EF202165,EF202162,KC470255,EF202167,EF202161,KC470252,KC470250,X74479,EF202163,KC470256,EF202166,EF202160,KC470259,KC470258,EF202156,KC470253,KC470260,KC470257,EF202159,EF202164,KC470254
Human papillomavirus type 48	NC_001690	vertebrates	1	Papillomaviridae,Gammapapillomavirus,Gammapapillomavirus 2	-	U31789
Human papillomavirus type 50	NC_001691	vertebrates	1	Papillomaviridae,Gammapapillomavirus,Gammapapillomavirus 3	-	U31790
Human papillomavirus type 51	NC_001583	vertebrates	1	Papillomaviridae,Alphapapillomavirus,Alphapapillomavirus 5	-	M62877
Human papillomavirus type 52	NC_001526	vertebrates	26	Papillomaviridae,Alphapapillomavirus,Alphapapillomavirus 9	-	HQ537751,HQ537736,HQ537734,HQ537742,HQ537746,AB819274,HQ537732,HQ537745,AB819273,HQ537738,HQ537743,AB819272,HQ537733,HQ537740,GQ472848,HQ537750,HQ537747,HQ537735,HQ537741,HQ537749,HQ537739,HQ537737,X74481,HQ537744,HQ537731,HQ537748
Human papillomavirus type 53	NC_001593	vertebrates	16	Papillomaviridae,Alphapapillomavirus,Alphapapillomavirus 6	-	EF546474,EF546479,EF546469,EF546470,X74482,EF546478,EF546480,EF546473,EF546482,EF546475,EF546472,EF546481,EF546471,EF546477,GQ472849,EF546476
Human papillomavirus type 55	NC_001355	vertebrates	1	Papillomaviridae,Alphapapillomavirus,Alphapapillomavirus 10	-	U31791
Human papillomavirus type 56	NC_001593	vertebrates	7	Papillomaviridae,Alphapapillomavirus,Alphapapillomavirus 6	-	EF177178,EF177181,EF177177,EF177179,X74483,EF177176,EF177180
Human papillomavirus type 57	NC_001352	vertebrates	1	Papillomaviridae,Alphapapillomavirus,Alphapapillomavirus 4	-	X55965
Human papillomavirus type 57b	NC_001352	vertebrates	1	Papillomaviridae,Alphapapillomavirus,Alphapapillomavirus 4	-	U37537
Human papillomavirus type 57c	NC_001352	vertebrates	1	Papillomaviridae,Alphapapillomavirus,Alphapapillomavirus 4	-	AB361563
Human papillomavirus type 58	NC_001526	vertebrates	45	Papillomaviridae,Alphapapillomavirus,Alphapapillomavirus 9	-	KC860271,HQ537758,HQ537757,EU918765,AB819278,HQ537753,FJ385267,HQ537763,HQ537775,HQ537769,FJ385261,FJ385265,GQ472850,HQ537768,AB819279,HQ537771,HQ537755,HQ537760,HQ537762,D90400,HQ537770,AB819276,FJ385268,HQ537759,FJ385266,KC860269,HQ537754,FJ385262,AB819277,HQ537777,HQ537766,HQ537765,HQ537764,HQ537761,AB819275,HQ537767,FJ385263,HQ537756,HQ537752,FJ385264,HQ537776,HQ537773,HQ537774,HQ537772,KC860…
Human papillomavirus type 59	NC_001357	vertebrates	8	Papillomaviridae,Alphapapillomavirus,Alphapapillomavirus 7	-	KC470262,KC470261,X77858,KC470266,KC470265,KC470263,KC470264,EU918767
Human papillomavirus type 6	NC_001355	vertebrates	168	Papillomaviridae,Alphapapillomavirus,Alphapapillomavirus 10	-	HG793909,HE962032,HG793933,HG793917,HG793935,HG793881,HG793851,HG793906,JN252321,HG793918,HG793900,HG793875,HG793847,HG793852,HG793908,HG793868,HG793878,HG793890,HG793839,FR751329,HG793826,HG793843,HG793821,FR751324,JN252320,HG793874,HG793856,HG793925,HG793937,HG793840,HG793849,HG793894,HG793882,HG793866,HG793896,HG793886,HG793865,HG793869,FR751320,HG793844,HG793905,FR751322,HE962028,HG793902,FR7…
Human papillomavirus type 60	NC_001693	vertebrates	1	Papillomaviridae,Gammapapillomavirus,Gammapapillomavirus 4	-	U31792
Human papillomavirus type 63	NC_001458	vertebrates	1	Papillomaviridae,Mupapillomavirus,Mupapillomavirus 2	-	X70828
Human papillomavirus type 65	NC_001457	vertebrates	1	Papillomaviridae,Gammapapillomavirus,Gammapapillomavirus 1	-	X70829
Human papillomavirus type 66	NC_001593	vertebrates	11	Papillomaviridae,Alphapapillomavirus,Alphapapillomavirus 6	-	EF177186,U31794,EF177184,EF177188,EF177185,EF177183,EF177191,EF177187,EF177182,EF177189,EF177190
Human papillomavirus type 67	NC_001526	vertebrates	8	Papillomaviridae,Alphapapillomavirus,Alphapapillomavirus 9	-	HQ537781,HQ537782,HQ537778,HQ537784,HQ537780,HQ537783,HQ537779,D21208
Human papillomavirus type 68	NC_001357	vertebrates	19	Papillomaviridae,Alphapapillomavirus,Alphapapillomavirus 7	-	KC470277,KC470271,KC470276,EU918769,KC470270,KC470282,KC470274,KC470278,KC470267,KC470275,KC470272,KC470279,KC470268,KC470273,KC470269,KC470283,GQ472851,KC470281,KC470280
Human papillomavirus type 68a	NC_001357	vertebrates	1	Papillomaviridae,Alphapapillomavirus,Alphapapillomavirus 7	-	DQ080079
Human papillomavirus type 68b	NC_001357	vertebrates	1	Papillomaviridae,Alphapapillomavirus,Alphapapillomavirus 7	-	FR751039
Human papillomavirus type 69	NC_001583	vertebrates	1	Papillomaviridae,Alphapapillomavirus,Alphapapillomavirus 5	-	AB027020
Human papillomavirus type 6a	NC_001355	vertebrates	1	Papillomaviridae,Alphapapillomavirus,Alphapapillomavirus 10	-	L41216
Human papillomavirus type 6b	NC_001355	vertebrates	1	Papillomaviridae,Alphapapillomavirus,Alphapapillomavirus 10	-	X00203
Human papillomavirus type 7	NC_001595	vertebrates	1	Papillomaviridae,Alphapapillomavirus,Alphapapillomavirus 8	-	X74463
Human papillomavirus type 70	NC_001357	vertebrates	9	Papillomaviridae,Alphapapillomavirus,Alphapapillomavirus 7	-	KC470289,KC470290,KC470291,U21941,KC470288,KC470287,KC470286,KC470284,KC470285
Human papillomavirus type 71	NC_004104	vertebrates	5	Papillomaviridae,Alphapapillomavirus,Alphapapillomavirus 14	-	AB040456,AY330623,AY330620,AY330622,AY330621
Human papillomavirus type 73	NC_001587	vertebrates	1	Papillomaviridae,Alphapapillomavirus,Alphapapillomavirus 11	-	X94165
Human papillomavirus type 74	NC_001355	vertebrates	1	Papillomaviridae,Alphapapillomavirus,Alphapapillomavirus 10	-	AF436130
Human papillomavirus type 77	NC_001576	vertebrates	1	Papillomaviridae,Alphapapillomavirus,Alphapapillomavirus 2	-	Y15175
Human papillomavirus type 82	NC_001583	vertebrates	2	Papillomaviridae,Alphapapillomavirus,Alphapapillomavirus 5	-	AB027021,AF293961
Human papillomavirus type 84	NC_001694	vertebrates	1	Papillomaviridae,Alphapapillomavirus,Alphapapillomavirus 3	-	AF293960
Human papillomavirus type 88	NC_010329	vertebrates	1	Papillomaviridae,Gammapapillomavirus,Gammapapillomavirus 5	-	EF467176
Human papillomavirus type 90	NC_004104	vertebrates	2	Papillomaviridae,Alphapapillomavirus,Alphapapillomavirus 14	-	AY057438,AB542808
Human papillomavirus type 94	NC_001576	vertebrates	3	Papillomaviridae,Alphapapillomavirus,Alphapapillomavirus 2	-	AB201226,GU117628,AJ620211
Human papillomavirus type 95	NC_001457	vertebrates	1	Papillomaviridae,Gammapapillomavirus,Gammapapillomavirus 1	-	AJ620210
Human papillomavirus type 97	NC_001357	vertebrates	3	Papillomaviridae,Alphapapillomavirus,Alphapapillomavirus 7	-	DQ080080,EF202168,EF436229
Human papillomavirus type XS2	NC_001576	vertebrates	1	Papillomaviridae,Alphapapillomavirus,Alphapapillomavirus 2	-	KC138720
Human parechovirus	NC_001897	vertebrates	3	Picornaviridae,Parechovirus,Human parechovirus	-	EU022171,KJ152442,AJ005695
Human parechovirus 1	NC_001897	vertebrates	18	Picornaviridae,Parechovirus,Human parechovirus	-	EF051629,S45208,GQ183021,GQ183035,GQ183023,FJ840477,GQ183019,JX441355,GQ183022,FM178558,KC769584,GQ183018,GQ183024,JX575746,GQ183020,GQ183025,L02971,GQ183034
Human parechovirus 2	NC_001897	vertebrates	1	Picornaviridae,Parechovirus,Human parechovirus	-	AF055846
Human parechovirus 3	NC_001897	vertebrates	13	Picornaviridae,Parechovirus,Human parechovirus	-	GQ183031,AJ889918,GQ183026,JX826607,GQ183027,AB668029,GQ183032,GQ183028,JX682576,AB084913,GQ183030,GQ183033,GQ183029
Human parechovirus 4	NC_001897	vertebrates	3	Picornaviridae,Parechovirus,Human parechovirus	-	DQ315670,AM235750,AB433629
Human parechovirus 5	NC_001897	vertebrates	2	Picornaviridae,Parechovirus,Human parechovirus	-	AM235749,JX050181
Human parechovirus 6	NC_001897	vertebrates	4	Picornaviridae,Parechovirus,Human parechovirus	-	AB252582,EU077518,FJ888592,EU024629
Human parechovirus 7	NC_001897	vertebrates	1	Picornaviridae,Parechovirus,Human parechovirus	-	EU556224
Human parechovirus 8	NC_001897	vertebrates	1	Picornaviridae,Parechovirus,Human parechovirus	-	EU716175
Human parechovirus type 1 PicoBank/HPeV1/a	NC_001897	vertebrates	1	Picornaviridae,Parechovirus,Human parechovirus	-	FM242866
Human parvovirus 4	NC_007018	vertebrates	7	Parvoviridae,Parvovirus,Human parvovirus 4	-	DQ873387,DQ873388,EU175856,EU175855,AY622943,EU874248,DQ873389
Human polyomavirus 10	NC_018102	vertebrates	1	Polyomaviridae,Polyomavirus,MW polyomavirus	-	JX262162
Human polyomavirus 12	NC_020890	vertebrates	1	Polyomaviridae,Polyomavirus,Human polyomavirus 12	-	JX308829
Human polyomavirus 9	NC_015150	vertebrates	2	Polyomaviridae,Polyomavirus,Human polyomavirus 9	-	KC831440,HQ696595
Human rhinovirus C	NC_009996	vertebrates	16	Picornaviridae,Enterovirus,Rhinovirus C	-	JF317015,JN798567,JF317014,JF317016,JN205461,JX291115,GU219984,EU840952,JF317013,JF317017,JQ245968,EF582386,JN837688,EF582385,DQ875932,EF582387
Human rhinovirus C strain QCE	NC_009996	vertebrates	1	Picornaviridae,Enterovirus,Rhinovirus C	-	GQ323774
Human rhinovirus C3	NC_009996	vertebrates	1	Picornaviridae,Enterovirus,Rhinovirus C	-	EF186077
Human rhinovirus C35	NC_009996	vertebrates	1	Picornaviridae,Enterovirus,Rhinovirus C	-	JF436925
Human spumaretrovirus	NC_001364	vertebrates	1	Retroviridae,Spumavirus,Simian foamy virus	-	U21247
Ictalurid herpesvirus 1	NC_001493	vertebrates	1	Alloherpesviridae,Ictalurivirus,Ictalurid herpesvirus 1	-	M75136
Infectious bronchitis virus	NC_010800,NC_001451	vertebrates	71	Coronaviridae,Gammacoronavirus,Avian coronavirus	-	DQ288927,DQ001339,AY338732,GU393335,GU393333,FJ904717,FJ904723,JQ977698,FJ904720,GU393337,EU714028,FJ904716,HM245924,JF274479,GQ504720,GU393332,GU393334,FJ904721,FJ904713,JX195175,JX195177,JF828981,JF893452,AY514485,GQ504723,FJ888351,JX195178,GU393331,GU393338,FJ807652,GQ504722,EU526388,GQ504721,DQ646405,JX195176,FJ904722,KF574761,KF377577,EU637854,JF330899,JX897900,DQ834384,AY641576,DQ001338,AY8…
Infectious bronchitis virus ITA/90254/2005	NC_010800,NC_001451	vertebrates	1	Coronaviridae,Gammacoronavirus,Avian coronavirus	-	FN430414
Infectious bronchitis virus NGA/A116E7/2006	NC_010800,NC_001451	vertebrates	1	Coronaviridae,Gammacoronavirus,Avian coronavirus	-	FN430415
Infectious bursal disease virus	NC_004178	vertebrates	93	Birnaviridae,Avibirnavirus,Infectious bursal disease virus	segment A	EF418034,AF051837,GQ166970,DQ403248,AF533670,AF092171,AF165150,JQ411012,EU162089,JF907702,EF418036,D00499,AF240686,GQ451330,EU595669,JX134483,D00867,AJ427340,AY598356,EU595670,AJ310185,EF418035,AY099456,AM167550,AY462026,AF140705,EU595667,EU595668,AY319768,AF362776,EU184687,FJ695138,AY134874,Z21971,X84034,AY323952,AF321054,AF527039,EU595672,DQ906921,D83985,EF646853,D00869,DQ927040,AY444873,AF0929…
Infectious bursal disease virus	NC_004179	vertebrates	87	Birnaviridae,Avibirnavirus,Infectious bursal disease virus	segment B	AY598355,EU162092,AM167551,AJ318897,JQ403647,AF493979,EU162093,AY459320,AY459321,AF322445,GQ166971,JX134484,AY134875,U30819,EU162095,EU595675,EU595677,AF092944,EF576658,EU162091,JF907704,AB368971,AF362748,AJ880090,AB368969,M19336,AY103464,X92761,EU595676,AF133905,AF203880,EU162094,JQ411013,GQ451331,AF083092,AF362774,X84035,U62661,EF688065,AY654284,AM111354,JF907705,AF499930,AF083093,AJ496637,D497…
Infectious bursal disease virus CU-1	NC_004178	vertebrates	1	Birnaviridae,Avibirnavirus,Infectious bursal disease virus	segment A	X16107
Infectious hematopoietic necrosis virus	NC_001652	vertebrates	5	Rhabdoviridae,Novirhabdovirus,Infectious hematopoietic necrosis virus	-	GQ413939,JX649101,X89213,L40883,HM461966
Infectious pancreatic necrosis virus	NC_001915	vertebrates	29	Birnaviridae,Aquabirnavirus,Infectious pancreatic necrosis virus	segment A	DQ536090,AY780919,AJ622822,AY780923,AY780921,M18049,AY374435,AY379738,AY780918,AY354519,AY379737,D00701,AY379736,AY780922,AY379742,DQ536091,AY823632,AY354520,AY379744,AY283780,AF078668,AY780924,U56907,D26526,EF493156,AY780920,AY354521,AY379735,AY379740
Infectious pancreatic necrosis virus	NC_001916	vertebrates	20	Birnaviridae,Aquabirnavirus,Infectious pancreatic necrosis virus	segment B	AY379741,AY379739,AY780930,AY379743,AY823633,M58756,AY129664,AY354522,AY780927,AY354523,AY354524,M58757,AY780929,AY780931,AY780925,AY780926,AY780928,D26527,AJ622823,AF078669
Infectious pancreatic necrosis virus - Mexico	NC_001916	vertebrates	1	Birnaviridae,Aquabirnavirus,Infectious pancreatic necrosis virus	segment B	EU665685
Infectious salmon anemia virus	NC_006497	vertebrates	44	Orthomyxoviridae,Isavirus,Infectious salmon anemia virus	segment 8	DQ022085,DQ785283,DQ785275,DQ785286,DQ003603,DQ785276,DQ003600,AF262386,EU118822,AF315063,DQ785278,AF404340,DQ785281,DQ003601,AF262382,DQ785279,AF262388,AF262380,DQ003607,AF262383,AY744395,DQ785285,AJ012285,DQ785277,AF262389,DQ058660,DQ003602,DQ785274,AF312317,Y10404,AF312315,DQ003606,DQ785280,AF262384,DQ003605,AF262381,DQ785284,AF262387,DQ785282,DQ003604,DQ785273,AJ242016,AF262385,AF312316
Infectious salmon anemia virus	NC_006498	vertebrates	8	Orthomyxoviridae,Isavirus,Infectious salmon anemia virus	segment 7	AY044132,AJ306487,AF404341,AF429990,AF328627,DQ673253,AF429989,DQ673254
Infectious salmon anemia virus	NC_006499	vertebrates	9	Orthomyxoviridae,Isavirus,Infectious salmon anemia virus	segment 6	AF404342,JN711062,AF220607,JN711065,AY059402,JN711074,JN711093,JN711096,JN711060
Infectious salmon anemia virus	NC_006500	vertebrates	38	Orthomyxoviridae,Isavirus,Infectious salmon anemia virus	segment 5	JN711056,JN711023,DQ465047,JN711047,JN711040,AF429986,JN711041,JN711021,JN711054,DQ465043,JN711030,JN711024,JN711019,DQ465044,AJ277461,DQ440507,JN711043,AF404343,AF429988,JN711044,DQ440508,AF429987,JN711053,JN711026,JN711055,JN711049,DQ465045,JN711045,JN711042,JN711050,JN711033,JN711046,JN711036,DQ465046,JN711022,JN711051,DQ440506,JN711031
Infectious salmon anemia virus	NC_006501	vertebrates	25	Orthomyxoviridae,Isavirus,Infectious salmon anemia virus	segment 4	DQ785227,DQ785223,DQ785221,DQ520600,DQ785218,DQ785224,AY744391,DQ785217,HM172539,DQ785222,DQ520601,DQ785229,DQ785219,DQ785228,DQ520602,DQ520598,AF404344,DQ520597,DQ785225,DQ785220,DQ785226,EU118818,DQ785230,AF306548,DQ520599
Infectious salmon anemia virus	NC_006502	vertebrates	92	Orthomyxoviridae,Isavirus,Infectious salmon anemia virus	segment 3	JN710910,JN710861,JN710908,JN710864,JN710894,JN710866,JN710854,JN710843,JN710915,JN710889,JN710839,JN710871,JN710846,JN710904,JN710918,JN710907,JN710840,JN710913,JN710881,JN710916,JN710858,JN710853,JN710919,JN710872,JN710844,JN710883,JN710903,AJ276858,JN710887,JN710906,JN710835,JN710842,HM172538,JN710837,AF404345,JN710873,JN710914,JN710867,JX070881,JN710890,JN710905,JN710879,JN710896,JN710841,JN7…
Infectious salmon anemia virus	NC_006503	vertebrates	23	Orthomyxoviridae,Isavirus,Infectious salmon anemia virus	segment 2	DQ676937,DQ785200,DQ785198,DQ785195,DQ785191,DQ785199,DQ785194,DQ520596,DQ785190,HM172537,AJ242808,EU118816,DQ785189,DQ520595,DQ785197,DQ785192,AF404346,AJ002475,AY744389,DQ785202,DQ785196,DQ785193,DQ785201
Infectious salmon anemia virus	NC_006505	vertebrates	32	Orthomyxoviridae,Isavirus,Infectious salmon anemia virus	segment 1	DQ785181,AY860813,AY168787,DQ785188,AY860812,AY954528,AY373381,DQ785183,DQ785176,DQ785186,AY373379,AY373380,DQ785175,AY860811,DQ785185,DQ785182,AY860808,AY373382,DQ785180,DQ785187,AY860809,AY860810,AJ514403,DQ785179,AY744388,EU118815,DQ785178,AY954527,HM172536,DQ785184,DQ785177,AY954526
Infectious spleen and kidney necrosis virus	NC_003494	vertebrates	1	Iridoviridae,Megalocytivirus,Infectious spleen and kidney necrosis virus	-	AF371960
Jaagsiekte sheep retrovirus	NC_001494	vertebrates	6	Retroviridae,Betaretrovirus,Jaagsiekte sheep retrovirus	-	AF105220,DQ838494,A27950,CQ964469,AF357971,M80216
Japanese eel endothelial cells-infecting virus	NC_015123	vertebrates	1	Japanese eel endothelial cells-infecting virus	-	AB543063
Jembrana disease virus	NC_001413	vertebrates	1	Retroviridae,Lentivirus,Bovine immunodeficiency virus	-	U21603
Koala retrovirus	NC_021704	vertebrates	1	Retroviridae,Gammaretrovirus,Koala retrovirus	-	KC779547
Kobuvirus pig/JY-2010a/CHN	NC_011829,NC_016769	vertebrates	1	Picornaviridae,Kobuvirus,Aichivirus C	-	GU292559
Kobuvirus sewage Kathmandu	NC_001918	vertebrates	1	Picornaviridae,Kobuvirus,Aichivirus A	-	JQ898342
Labidocera aestiva circovirus	NC_017843	vertebrates	1	Circoviridae,Circovirus,Labidocera aestiva circovirus	-	JF912805
Lactate dehydrogenase-elevating virus	NC_001639	vertebrates	2	Arteriviridae,Arterivirus,Lactate dehydrogenase-elevating virus	-	U15146,L13298
Lagenorhynchus acutus papillomavirus	NC_011109	vertebrates	1	Papillomaviridae,Upsilonpapillomavirus,Upsilonpapillomavirus 1	-	GU117624
Lambdapapillomavirus 3	NC_013237	vertebrates	1	Papillomaviridae,Lambdapapillomavirus,Lambdapapillomavirus 3	-	FJ492744
Large yellow croaker iridovirus	NC_003494	vertebrates	1	Iridoviridae,Megalocytivirus,Infectious spleen and kidney necrosis virus	-	AY779031
Lelystad virus	NC_001961	vertebrates	1	Arteriviridae,Arterivirus,Porcine reproductive and respiratory syndrome virus	-	M96262
Ljungan virus	NC_003976	vertebrates	3	Picornaviridae,Parechovirus,Ljungan virus	-	AF538689,EF202833,AF327920
Ljungan virus strain 145SL	NC_003976	vertebrates	2	Picornaviridae,Parechovirus,Ljungan virus	-	AF327922,FJ384560
Ljungan virus strain 174F	NC_003976	vertebrates	1	Picornaviridae,Parechovirus,Ljungan virus	-	AF327921
LuIII virus	NC_004713	vertebrates	1	Parvoviridae,Parvovirus,LuIII virus	-	M81888
Lumpy skin disease virus	NC_003027	vertebrates	1	Poxviridae,Capripoxvirus,Lumpy skin disease virus	-	AF409138
Lumpy skin disease virus NI-2490	NC_003027	vertebrates	1	Poxviridae,Capripoxvirus,Lumpy skin disease virus	-	AF325528
Lumpy skin disease virus NW-LW	NC_003027	vertebrates	1	Poxviridae,Capripoxvirus,Lumpy skin disease virus	-	AF409137
Lymphocystis disease virus - isolate China	NC_005902	vertebrates	1	Iridoviridae,Lymphocystivirus,Lymphocystis disease virus - isolate China	-	AY380826
Lymphocystis disease virus 1	NC_001824	vertebrates	1	Iridoviridae,Lymphocystivirus,Lymphocystis disease virus 1	-	L63545
Lynx rufus papillomavirus type 1	NC_004765	vertebrates	1	Papillomaviridae,Lambdapapillomavirus,Lambdapapillomavirus 1	-	AY904722
MW polyomavirus	NC_018102	vertebrates	11	Polyomaviridae,Polyomavirus,MW polyomavirus	-	JQ898292,KC549591,KC549588,JQ898291,KC549590,KC549587,KC549589,KC549593,KC549594,KC549592,KC549586
Macaca fascicularis papillomavirus type 10	NC_001678	vertebrates	1	Papillomaviridae,Alphapapillomavirus,Alphapapillomavirus 12	-	EU490515
Macaca fascicularis papillomavirus type 11	NC_001678	vertebrates	1	Papillomaviridae,Alphapapillomavirus,Alphapapillomavirus 12	-	GQ227670
Macaca fascicularis papillomavirus type 3	NC_001678	vertebrates	1	Papillomaviridae,Alphapapillomavirus,Alphapapillomavirus 12	-	EF558839
Macaca fascicularis papillomavirus type 3b	NC_001678	vertebrates	1	Papillomaviridae,Alphapapillomavirus,Alphapapillomavirus 12	-	EF591299
Macaca fascicularis papillomavirus type 4	NC_001678	vertebrates	1	Papillomaviridae,Alphapapillomavirus,Alphapapillomavirus 12	-	EF558841
Macaca fascicularis papillomavirus type 5	NC_001678	vertebrates	1	Papillomaviridae,Alphapapillomavirus,Alphapapillomavirus 12	-	EF558843
Macaca fascicularis papillomavirus type 6	NC_001678	vertebrates	1	Papillomaviridae,Alphapapillomavirus,Alphapapillomavirus 12	-	EF558840
Macaca fascicularis papillomavirus type 7	NC_001678	vertebrates	1	Papillomaviridae,Alphapapillomavirus,Alphapapillomavirus 12	-	EF558838
Macaca fascicularis papillomavirus type 8	NC_001678	vertebrates	1	Papillomaviridae,Alphapapillomavirus,Alphapapillomavirus 12	-	EF558842
Macaca fascicularis papillomavirus type 9	NC_001678	vertebrates	1	Papillomaviridae,Alphapapillomavirus,Alphapapillomavirus 12	-	EU490516
Macaca fascicularis polyomavirus 1	NC_019851	vertebrates	1	Polyomaviridae,Polyomavirus,Macaca fascicularis polyomavirus 1	-	JX159986
Macaca fuscata rhadinovirus	NC_003401	vertebrates	3	Herpesviridae,Rhadinovirus,Macacine herpesvirus 5	-	JN885137,AY528864,JN885136
Macacine herpesvirus 1	NC_004812	vertebrates	1	Herpesviridae,Simplexvirus,Macacine herpesvirus 1	-	AF533768
Macacine herpesvirus 3	NC_006150	vertebrates	3	Herpesviridae,Cytomegalovirus,Macacine herpesvirus 3	-	DQ120516,JQ795930,AY186194
Macacine herpesvirus 4	NC_006146	vertebrates	1	Herpesviridae,Lymphocryptovirus,Macacine herpesvirus 4	-	AY037858
Macacine herpesvirus 5	NC_003401	vertebrates	1	Herpesviridae,Rhadinovirus,Macacine herpesvirus 5	-	AF083501
Macaque simian foamy virus	NC_010819	vertebrates	2	Retroviridae,Spumavirus,Macaque simian foamy virus	-	X54482,JN801175
Magpie-robin coronavirus HKU18	NC_016993	vertebrates	1	Coronaviridae,Deltacoronavirus,Magpie-robin coronavirus HKU18	-	JQ065046
Mamastrovirus 10	NC_004579	vertebrates	1	Astroviridae,Mamastrovirus,Mamastrovirus 10	-	AY179509
Mamastrovirus 13	NC_002469	vertebrates	1	Astroviridae,Mamastrovirus,Mamastrovirus 13	-	Y15937
Mammalian Orthoreovirus strain T3/Bat/Germany/342/08	NC_004274	vertebrates	1	Reoviridae,Orthoreovirus,Mammalian orthoreovirus	segment L3	JQ412757
Mammalian Orthoreovirus strain T3/Bat/Germany/342/08	NC_004275	vertebrates	1	Reoviridae,Orthoreovirus,Mammalian orthoreovirus	segment L2	JQ412756
Mammalian Orthoreovirus strain T3/Bat/Germany/342/08	NC_004276	vertebrates	1	Reoviridae,Orthoreovirus,Mammalian orthoreovirus	segment S4	JQ412764
Mammalian Orthoreovirus strain T3/Bat/Germany/342/08	NC_004277	vertebrates	1	Reoviridae,Orthoreovirus,Mammalian orthoreovirus	segment S1	JQ412761
Mammalian Orthoreovirus strain T3/Bat/Germany/342/08	NC_004278	vertebrates	1	Reoviridae,Orthoreovirus,Mammalian orthoreovirus	segment M2	JQ412759
Mammalian Orthoreovirus strain T3/Bat/Germany/342/08	NC_004279	vertebrates	1	Reoviridae,Orthoreovirus,Mammalian orthoreovirus	segment S2	JQ412762
Mammalian Orthoreovirus strain T3/Bat/Germany/342/08	NC_004280	vertebrates	1	Reoviridae,Orthoreovirus,Mammalian orthoreovirus	segment M1	JQ412758
Mammalian Orthoreovirus strain T3/Bat/Germany/342/08	NC_004281	vertebrates	1	Reoviridae,Orthoreovirus,Mammalian orthoreovirus	segment M3	JQ412760
Mammalian Orthoreovirus strain T3/Bat/Germany/342/08	NC_004282	vertebrates	1	Reoviridae,Orthoreovirus,Mammalian orthoreovirus	segment L1	JQ412755
Mammalian Orthoreovirus strain T3/Bat/Germany/342/08	NC_004283	vertebrates	1	Reoviridae,Orthoreovirus,Mammalian orthoreovirus	segment S3	JQ412763
Mammalian Orthoreovirus strain T3/Bat/Germany/342/08	NC_013228	vertebrates	1	Reoviridae,Orthoreovirus,Mammalian orthoreovirus	segment M2	JQ412759
Mammalian Orthoreovirus strain T3/Bat/Germany/342/08	NC_013230	vertebrates	1	Reoviridae,Orthoreovirus,Mammalian orthoreovirus	segment M3	JQ412760
Mammalian Orthoreovirus strain T3/Bat/Germany/342/08	NC_013232	vertebrates	1	Reoviridae,Orthoreovirus,Mammalian orthoreovirus	segment S2	JQ412762
Mammalian Orthoreovirus strain T3/Bat/Germany/342/08	NC_013234	vertebrates	1	Reoviridae,Orthoreovirus,Mammalian orthoreovirus	segment S4	JQ412764
Mammalian orthoreovirus	NC_004274	vertebrates	2	Reoviridae,Orthoreovirus,Mammalian orthoreovirus	segment L3	EF029088,JN799428
Mammalian orthoreovirus	NC_004275	vertebrates	3	Reoviridae,Orthoreovirus,Mammalian orthoreovirus	segment L2	DQ885990,HQ642770,JN799427
Mammalian orthoreovirus	NC_004276	vertebrates	2	Reoviridae,Orthoreovirus,Mammalian orthoreovirus	segment S4	DQ396806,JN799422
Mammalian orthoreovirus	NC_004277	vertebrates	3	Reoviridae,Orthoreovirus,Mammalian orthoreovirus	segment S1	DQ911244,HQ642775,JN799419
Mammalian orthoreovirus	NC_004278	vertebrates	3	Reoviridae,Orthoreovirus,Mammalian orthoreovirus	segment M2	JN799424,HQ642772,DQ482462
Mammalian orthoreovirus	NC_004279	vertebrates	3	Reoviridae,Orthoreovirus,Mammalian orthoreovirus	segment S2	JN799420,DQ396805,HQ642776
Mammalian orthoreovirus	NC_004280	vertebrates	3	Reoviridae,Orthoreovirus,Mammalian orthoreovirus	segment M1	HQ642773,JN799423,DQ396804
Mammalian orthoreovirus	NC_004281	vertebrates	2	Reoviridae,Orthoreovirus,Mammalian orthoreovirus	segment M3	JN799425,DQ403254
Mammalian orthoreovirus	NC_004282	vertebrates	3	Reoviridae,Orthoreovirus,Mammalian orthoreovirus	segment L1	JN799426,HQ642771,DQ997719
Mammalian orthoreovirus	NC_004283	vertebrates	3	Reoviridae,Orthoreovirus,Mammalian orthoreovirus	segment S3	JN799421,HQ642777,DQ411553
Mammalian orthoreovirus	NC_013228	vertebrates	3	Reoviridae,Orthoreovirus,Mammalian orthoreovirus	segment M2	JN799424,HQ642772,DQ482462
Mammalian orthoreovirus	NC_013230	vertebrates	2	Reoviridae,Orthoreovirus,Mammalian orthoreovirus	segment M3	JN799425,DQ403254
Mammalian orthoreovirus	NC_013232	vertebrates	3	Reoviridae,Orthoreovirus,Mammalian orthoreovirus	segment S2	JN799420,DQ396805,HQ642776
Mammalian orthoreovirus	NC_013234	vertebrates	2	Reoviridae,Orthoreovirus,Mammalian orthoreovirus	segment S4	DQ396806,JN799422
Mammalian orthoreovirus 1	NC_004274	vertebrates	1	Reoviridae,Orthoreovirus,Mammalian orthoreovirus	segment L3	AF129820
Mammalian orthoreovirus 1	NC_004275	vertebrates	1	Reoviridae,Orthoreovirus,Mammalian orthoreovirus	segment L2	AF378004
Mammalian orthoreovirus 1	NC_004276	vertebrates	2	Reoviridae,Orthoreovirus,Mammalian orthoreovirus	segment S4	X61586,M13139
Mammalian orthoreovirus 1	NC_004277	vertebrates	8	Reoviridae,Orthoreovirus,Mammalian orthoreovirus	segment S1	AY862136,EF494445,M10260,AY862135,M35963,M14779,AY862133,AY862134
Mammalian orthoreovirus 1	NC_004278	vertebrates	2	Reoviridae,Orthoreovirus,Mammalian orthoreovirus	segment M2	M19345,M19407
Mammalian orthoreovirus 1	NC_004279	vertebrates	2	Reoviridae,Orthoreovirus,Mammalian orthoreovirus	segment S2	M17598,L19774
Mammalian orthoreovirus 1	NC_004280	vertebrates	4	Reoviridae,Orthoreovirus,Mammalian orthoreovirus	segment M1	AY428872,X59945,AY428870,AY428871
Mammalian orthoreovirus 1	NC_004281	vertebrates	1	Reoviridae,Orthoreovirus,Mammalian orthoreovirus	segment M3	AF174382
Mammalian orthoreovirus 1	NC_004283	vertebrates	2	Reoviridae,Orthoreovirus,Mammalian orthoreovirus	segment S3	M14325,M18389
Mammalian orthoreovirus 1	NC_013228	vertebrates	2	Reoviridae,Orthoreovirus,Mammalian orthoreovirus	segment M2	M19345,M19407
Mammalian orthoreovirus 1	NC_013230	vertebrates	1	Reoviridae,Orthoreovirus,Mammalian orthoreovirus	segment M3	AF174382
Mammalian orthoreovirus 1	NC_013232	vertebrates	2	Reoviridae,Orthoreovirus,Mammalian orthoreovirus	segment S2	M17598,L19774
Mammalian orthoreovirus 1	NC_013234	vertebrates	2	Reoviridae,Orthoreovirus,Mammalian orthoreovirus	segment S4	X61586,M13139
Mammalian orthoreovirus 2	NC_004274	vertebrates	3	Reoviridae,Orthoreovirus,Mammalian orthoreovirus	segment L3	AF129821,GU196308,DQ664186
Mammalian orthoreovirus 2	NC_004275	vertebrates	3	Reoviridae,Orthoreovirus,Mammalian orthoreovirus	segment L2	DQ664185,GU196307,AF378006
Mammalian orthoreovirus 2	NC_004276	vertebrates	2	Reoviridae,Orthoreovirus,Mammalian orthoreovirus	segment S4	DQ318037,GU196313
Mammalian orthoreovirus 2	NC_004277	vertebrates	10	Reoviridae,Orthoreovirus,Mammalian orthoreovirus	segment S1	EU049605,AY862137,EU049607,EU049604,EU049603,M35964,GU196315,AY862138,EU049606,DQ312301
Mammalian orthoreovirus 2	NC_004278	vertebrates	2	Reoviridae,Orthoreovirus,Mammalian orthoreovirus	segment M2	DQ664188,GU196310
Mammalian orthoreovirus 2	NC_004279	vertebrates	2	Reoviridae,Orthoreovirus,Mammalian orthoreovirus	segment S2	GU196311,DQ664190
Mammalian orthoreovirus 2	NC_004280	vertebrates	4	Reoviridae,Orthoreovirus,Mammalian orthoreovirus	segment M1	AY428873,DQ664187,GU196309,AY428874
Mammalian orthoreovirus 2	NC_004281	vertebrates	3	Reoviridae,Orthoreovirus,Mammalian orthoreovirus	segment M3	GU196314,DQ664189,AF174383
Mammalian orthoreovirus 2	NC_004282	vertebrates	2	Reoviridae,Orthoreovirus,Mammalian orthoreovirus	segment L1	DQ664184,GU196306
Mammalian orthoreovirus 2	NC_004283	vertebrates	3	Reoviridae,Orthoreovirus,Mammalian orthoreovirus	segment S3	GU196312,M18390,DQ664191
Mammalian orthoreovirus 2	NC_013228	vertebrates	2	Reoviridae,Orthoreovirus,Mammalian orthoreovirus	segment M2	DQ664188,GU196310
Mammalian orthoreovirus 2	NC_013230	vertebrates	3	Reoviridae,Orthoreovirus,Mammalian orthoreovirus	segment M3	GU196314,DQ664189,AF174383
Mammalian orthoreovirus 2	NC_013232	vertebrates	2	Reoviridae,Orthoreovirus,Mammalian orthoreovirus	segment S2	GU196311,DQ664190
Mammalian orthoreovirus 2	NC_013234	vertebrates	2	Reoviridae,Orthoreovirus,Mammalian orthoreovirus	segment S4	DQ318037,GU196313
Mammalian orthoreovirus 2 D5/Jones	NC_004276	vertebrates	1	Reoviridae,Orthoreovirus,Mammalian orthoreovirus	segment S4	X60066
Mammalian orthoreovirus 2 D5/Jones	NC_013234	vertebrates	1	Reoviridae,Orthoreovirus,Mammalian orthoreovirus	segment S4	X60066
Mammalian orthoreovirus 3	NC_004274	vertebrates	8	Reoviridae,Orthoreovirus,Mammalian orthoreovirus	segment L3	GU991661,JX486059,JQ599141,EF494437,M23747,AF129822,GU991671,GU589579
Mammalian orthoreovirus 3	NC_004275	vertebrates	11	Reoviridae,Orthoreovirus,Mammalian orthoreovirus	segment L2	JQ599139,AF378008,GU991660,AF378007,JX486058,EF494436,GU991670,AF378010,AF378009,GU589578,J03488
Mammalian orthoreovirus 3	NC_004276	vertebrates	12	Reoviridae,Orthoreovirus,Mammalian orthoreovirus	segment S4	GU991678,K02739,DQ004471,DQ004472,DQ004473,GU589586,JX486066,DQ004470,DQ004474,EF494444,DQ004475,GU991668
Mammalian orthoreovirus 3	NC_004277	vertebrates	24	Reoviridae,Orthoreovirus,Mammalian orthoreovirus	segment S1	JQ979280,JQ979277,GU991675,JQ599138,JQ979273,GU991665,AY302467,JQ979272,JQ979275,JQ979284,EF494441,JQ979282,GU589583,JQ979274,JX486063,JQ979271,JQ979281,X01161,JQ979283,JQ979278,JQ979285,M10262,JQ979279,JQ979276
Mammalian orthoreovirus 3	NC_004278	vertebrates	8	Reoviridae,Orthoreovirus,Mammalian orthoreovirus	segment M2	GU991663,GU589581,M20161,EF494439,GU991673,JX486061,M19408,U24260
Mammalian orthoreovirus 3	NC_004279	vertebrates	8	Reoviridae,Orthoreovirus,Mammalian orthoreovirus	segment S2	GU589584,JX486064,GU991666,L19776,GU991676,EF494442,J02327,M25780
Mammalian orthoreovirus 3	NC_004280	vertebrates	13	Reoviridae,Orthoreovirus,Mammalian orthoreovirus	segment M1	GU991672,GU589580,GU991662,AY428878,M27261,AY428875,AY551083,EF494438,AY428876,AF461683,AY428877,JX486060,AF461684
Mammalian orthoreovirus 3	NC_004281	vertebrates	7	Reoviridae,Orthoreovirus,Mammalian orthoreovirus	segment M3	GU991664,AF174384,JX486062,EF494440,M27262,GU589582,GU991674
Mammalian orthoreovirus 3	NC_004282	vertebrates	7	Reoviridae,Orthoreovirus,Mammalian orthoreovirus	segment L1	M31058,GU991669,JQ599140,GU589577,EF494435,JX486057,GU991659
Mammalian orthoreovirus 3	NC_004283	vertebrates	6	Reoviridae,Orthoreovirus,Mammalian orthoreovirus	segment S3	JX486065,X01627,GU991667,GU991677,GU589585,EF494443
Mammalian orthoreovirus 3	NC_013225	vertebrates	1	Reoviridae,Orthoreovirus,Mammalian orthoreovirus	segment L1	GQ468266
Mammalian orthoreovirus 3	NC_013226	vertebrates	1	Reoviridae,Orthoreovirus,Mammalian orthoreovirus	segment L2	GQ468267
Mammalian orthoreovirus 3	NC_013227	vertebrates	1	Reoviridae,Orthoreovirus,Mammalian orthoreovirus	segment M1	GQ468268
Mammalian orthoreovirus 3	NC_013228	vertebrates	8	Reoviridae,Orthoreovirus,Mammalian orthoreovirus	segment M2	GU991663,GU589581,M20161,EF494439,GU991673,GQ468269,JX486061,U24260
Mammalian orthoreovirus 3	NC_013229	vertebrates	1	Reoviridae,Orthoreovirus,Mammalian orthoreovirus	segment L3	GQ468270
Mammalian orthoreovirus 3	NC_013230	vertebrates	7	Reoviridae,Orthoreovirus,Mammalian orthoreovirus	segment M3	GU991664,AF174384,JX486062,EF494440,GU589582,GU991674,GQ468271
Mammalian orthoreovirus 3	NC_013231	vertebrates	1	Reoviridae,Orthoreovirus,Mammalian orthoreovirus	segment S1	GQ468272
Mammalian orthoreovirus 3	NC_013232	vertebrates	8	Reoviridae,Orthoreovirus,Mammalian orthoreovirus	segment S2	GU589584,JX486064,GU991666,L19776,GU991676,EF494442,GQ468273,J02327
Mammalian orthoreovirus 3	NC_013233	vertebrates	1	Reoviridae,Orthoreovirus,Mammalian orthoreovirus	segment S3	GQ468274
Mammalian orthoreovirus 3	NC_013234	vertebrates	12	Reoviridae,Orthoreovirus,Mammalian orthoreovirus	segment S4	GU991678,DQ004471,DQ004472,DQ004473,GU589586,JX486066,GQ468275,DQ004470,DQ004474,EF494444,DQ004475,GU991668
Mammalian orthoreovirus 3 Dearing	NC_004274	vertebrates	1	Reoviridae,Orthoreovirus,Mammalian orthoreovirus	segment L3	HM159615
Mammalian orthoreovirus 3 Dearing	NC_004275	vertebrates	1	Reoviridae,Orthoreovirus,Mammalian orthoreovirus	segment L2	HM159614
Mammalian orthoreovirus 3 Dearing	NC_004276	vertebrates	4	Reoviridae,Orthoreovirus,Mammalian orthoreovirus	segment S4	AF332135,HM159622,AF332136,AF332137
Mammalian orthoreovirus 3 Dearing	NC_004277	vertebrates	1	Reoviridae,Orthoreovirus,Mammalian orthoreovirus	segment S1	HM159619
Mammalian orthoreovirus 3 Dearing	NC_004278	vertebrates	1	Reoviridae,Orthoreovirus,Mammalian orthoreovirus	segment M2	HM159617
Mammalian orthoreovirus 3 Dearing	NC_004279	vertebrates	1	Reoviridae,Orthoreovirus,Mammalian orthoreovirus	segment S2	HM159620
Mammalian orthoreovirus 3 Dearing	NC_004280	vertebrates	1	Reoviridae,Orthoreovirus,Mammalian orthoreovirus	segment M1	HM159616
Mammalian orthoreovirus 3 Dearing	NC_004281	vertebrates	1	Reoviridae,Orthoreovirus,Mammalian orthoreovirus	segment M3	HM159618
Mammalian orthoreovirus 3 Dearing	NC_004282	vertebrates	1	Reoviridae,Orthoreovirus,Mammalian orthoreovirus	segment L1	HM159613
Mammalian orthoreovirus 3 Dearing	NC_004283	vertebrates	1	Reoviridae,Orthoreovirus,Mammalian orthoreovirus	segment S3	HM159621
Mammalian orthoreovirus 3 Dearing	NC_013228	vertebrates	1	Reoviridae,Orthoreovirus,Mammalian orthoreovirus	segment M2	HM159617
Mammalian orthoreovirus 3 Dearing	NC_013230	vertebrates	1	Reoviridae,Orthoreovirus,Mammalian orthoreovirus	segment M3	HM159618
Mammalian orthoreovirus 3 Dearing	NC_013232	vertebrates	1	Reoviridae,Orthoreovirus,Mammalian orthoreovirus	segment S2	HM159620
Mammalian orthoreovirus 3 Dearing	NC_013234	vertebrates	4	Reoviridae,Orthoreovirus,Mammalian orthoreovirus	segment S4	AF332135,HM159622,AF332136,AF332137
Mammalian orthoreovirus 4 Ndelle	NC_004276	vertebrates	1	Reoviridae,Orthoreovirus,Mammalian orthoreovirus	segment S4	AF368037
Mammalian orthoreovirus 4 Ndelle	NC_004277	vertebrates	1	Reoviridae,Orthoreovirus,Mammalian orthoreovirus	segment S1	AF368035
Mammalian orthoreovirus 4 Ndelle	NC_004278	vertebrates	1	Reoviridae,Orthoreovirus,Mammalian orthoreovirus	segment M2	AF368034
Mammalian orthoreovirus 4 Ndelle	NC_004279	vertebrates	1	Reoviridae,Orthoreovirus,Mammalian orthoreovirus	segment S2	AF368036
Mammalian orthoreovirus 4 Ndelle	NC_004282	vertebrates	1	Reoviridae,Orthoreovirus,Mammalian orthoreovirus	segment L1	AF368033
Mammalian orthoreovirus 4 Ndelle	NC_013228	vertebrates	1	Reoviridae,Orthoreovirus,Mammalian orthoreovirus	segment M2	AF368034
Mammalian orthoreovirus 4 Ndelle	NC_013232	vertebrates	1	Reoviridae,Orthoreovirus,Mammalian orthoreovirus	segment S2	AF368036
Mammalian orthoreovirus 4 Ndelle	NC_013234	vertebrates	1	Reoviridae,Orthoreovirus,Mammalian orthoreovirus	segment S4	AF368037
Marine birnavirus	NC_008019	vertebrates	5	Birnaviridae,Aquabirnavirus,Marine birnavirus	segment A	AY283785,AY064396,AY283781,AY283782,AY283784
Marine birnavirus	NC_008026	vertebrates	3	Birnaviridae,Aquabirnavirus,Marine birnavirus	segment B	AY123970,AY129665,AY129666
Marine birnavirus - H1	NC_008019	vertebrates	1	Birnaviridae,Aquabirnavirus,Marine birnavirus	segment A	AY283783
Mason-Pfizer monkey virus	NC_001550	vertebrates	2	Retroviridae,Betaretrovirus,Mason-Pfizer monkey virus	-	AF033815,M12349
Mastomys coucha papillomavirus 2	NC_008519	vertebrates	1	Papillomaviridae,Pipapillomavirus,Pipapillomavirus 1	-	DQ664501
Mastomys natalensis papillomavirus	NC_001605	vertebrates	1	Papillomaviridae,Iotapapillomavirus,Iotapapillomavirus 1	-	U01834
Melaka orthoreovirus	NC_020439	vertebrates	1	Reoviridae,Orthoreovirus,Melaka orthoreovirus	segment L1	JF342660
Melaka orthoreovirus	NC_020440	vertebrates	1	Reoviridae,Orthoreovirus,Melaka orthoreovirus	segment L3	JF342662
Melaka orthoreovirus	NC_020441	vertebrates	1	Reoviridae,Orthoreovirus,Melaka orthoreovirus	segment M1	JF342663
Melaka orthoreovirus	NC_020442	vertebrates	1	Reoviridae,Orthoreovirus,Melaka orthoreovirus	segment M2	JF342664
Melaka orthoreovirus	NC_020443	vertebrates	1	Reoviridae,Orthoreovirus,Melaka orthoreovirus	segment M3	JF342665
Melaka orthoreovirus	NC_020444	vertebrates	1	Reoviridae,Orthoreovirus,Melaka orthoreovirus	segment S2	EF026044
Melaka orthoreovirus	NC_020445	vertebrates	1	Reoviridae,Orthoreovirus,Melaka orthoreovirus	segment S3	EF026045
Melaka orthoreovirus	NC_020446	vertebrates	1	Reoviridae,Orthoreovirus,Melaka orthoreovirus	segment S4	EF026046
Melaka orthoreovirus	NC_020447	vertebrates	1	Reoviridae,Orthoreovirus,Melaka orthoreovirus	segment L2	JF342661
Melaka orthoreovirus	NC_020448	vertebrates	1	Reoviridae,Orthoreovirus,Melaka orthoreovirus	segment S1	EF026043
Meleagrid herpesvirus 1	NC_002641	vertebrates	2	Herpesviridae,Mardivirus,Meleagrid herpesvirus 1	-	AF282130,AF291866
Mengo virus	NC_001479	vertebrates	2	Picornaviridae,Cardiovirus,Encephalomyocarditis virus	-	L22089,DQ294633
Mesocricetus auratus papillomavirus 1	NC_022647	vertebrates	1	Papillomaviridae,,Mesocricetus auratus papillomavirus 1	-	HG530538
Middle East respiratory syndrome coronavirus	NC_019843	vertebrates	30	Coronaviridae,Betacoronavirus,Middle East respiratory syndrome coronavirus	-	KF600645,KF192507,KJ156944,KJ156952,KJ156869,KF600630,KF600652,KF600634,KJ156934,KF600620,KF600651,KF600644,KF600612,KF600627,KF600628,KF961221,KF961222,KF600613,KF186565,KF745068,KF186564,KF186566,KF600647,KF186567,KJ156910,KJ156874,KF600632,KJ156881,KJ156866,KJ156949
Miniopterus bat coronavirus HKU8	NC_010438	vertebrates	1	Coronaviridae,Alphacoronavirus,Miniopterus bat coronavirus HKU8	-	EU420139
Miniopterus polyomavirus	NC_020069	vertebrates	1	Polyomaviridae,Polyomavirus,Miniopterus polyomavirus	-	JX520661
Mink astrovirus	NC_004579	vertebrates	1	Astroviridae,Mamastrovirus,Mamastrovirus 10	-	GU985458
Mink calicivirus	NC_019712	vertebrates	1	Caliciviridae,Vesivirus,Mink calicivirus	-	JX847605
Minute virus of mice	NC_001510	vertebrates	3	Parvoviridae,Parvovirus,Minute virus of mice	-	M12032,J02275,DQ196317
Molluscum contagiosum virus subtype 1	NC_001731	vertebrates	1	Poxviridae,Molluscipoxvirus,Molluscum contagiosum virus	-	U60315
Moloney murine leukemia virus	NC_001702,NC_001819,NC_001362,NC_001501	vertebrates	2	Retroviridae,Gammaretrovirus,Murine leukemia virus	-	AF462057,CS272315
Moloney murine sarcoma virus	NC_001502	vertebrates	4	Retroviridae,Gammaretrovirus,Moloney murine sarcoma virus	-	J02266,V01185,V01184,AF033813
Monkey B-lymphotropic papovavirus	NC_004763	vertebrates	1	Polyomaviridae,Polyomavirus,African green monkey polyomavirus	-	M30540
Monkeypox virus	NC_003310	vertebrates	36	Poxviridae,Orthopoxvirus,Monkeypox virus	-	JX878427,AY741551,JX878415,JX878410,JX878416,JX878422,DQ011156,JX878419,HQ857562,JX878407,JX878414,DQ011154,JX878408,JX878428,AY753185,DQ011155,JX878409,JX878420,JX878426,JX878417,JX878429,HM172544,JX878412,JX878423,DQ011157,JX878425,DQ011153,JX878421,KC257459,JX878424,KC257460,AY603973,HQ857563,JX878411,JX878413,JX878418
Monkeypox virus Zaire-96-I-16	NC_003310	vertebrates	1	Poxviridae,Orthopoxvirus,Monkeypox virus	-	AF380138
Morelia spilota papillomavirus 1	NC_016013	vertebrates	1	Papillomaviridae,,Morelia spilota papillomavirus 1	-	HQ262535
Mouse astrovirus M-52/USA/2008	NC_015935	vertebrates	1	Astroviridae,,Mouse astrovirus M-52/USA/2008	-	JF755422
Mouse kobuvirus M-5/USA/2010	NC_015936	vertebrates	1	Picornaviridae,Kobuvirus,Mouse kobuvirus M-5/USA/2010	-	JF755427
Mouse mammary tumor virus	NC_001503	vertebrates	3	Retroviridae,Betaretrovirus,Mouse mammary tumor virus	-	AF033807,M15122,D16249
Mouse parvovirus 1	NC_001630	vertebrates	1	Parvoviridae,Parvovirus,Mouse parvovirus 1	-	U12469
Mouse parvovirus 1e	NC_001630	vertebrates	1	Parvoviridae,Parvovirus,Mouse parvovirus 1	-	DQ898166
Mouse parvovirus 2	NC_008186	vertebrates	1	Parvoviridae,Parvovirus,Mouse parvovirus 2	-	DQ196319
Mouse parvovirus 3	NC_008185	vertebrates	1	Parvoviridae,Parvovirus,Mouse parvovirus 3	-	DQ196318
Mouse parvovirus 4a	NC_011619	vertebrates	1	Parvoviridae,Parvovirus,Mouse parvovirus 4	-	FJ440683
Mouse parvovirus 4b	NC_011619	vertebrates	1	Parvoviridae,Parvovirus,Mouse parvovirus 4	-	FJ445512
Mouse parvovirus 5a	NC_011618	vertebrates	1	Parvoviridae,Parvovirus,Mouse parvovirus 5a	-	FJ441297
Mouse polyomavirus (strain Crawford small-plaque)	NC_001515	vertebrates	1	Polyomaviridae,Polyomavirus,Murine polyomavirus	-	K02737
Mulard duck circovirus	NC_005053,NC_007220,NC_006561	vertebrates	2	Circoviridae,Circovirus,Duck circovirus	-	HQ180266,AY228555
Munia coronavirus HKU13-3514	NC_011550	vertebrates	1	Coronaviridae,Deltacoronavirus,Munia coronavirus HKU13	-	FJ376622
Murid herpesvirus 1	NC_004065	vertebrates	8	Herpesviridae,Muromegalovirus,Murid herpesvirus 1	-	GU305914,U68299,HE610452,HE610456,HE610455,HE610454,HE610451,HE610453
Murid herpesvirus 2	NC_002512	vertebrates	1	Herpesviridae,Muromegalovirus,Murid herpesvirus 2	-	AF232689
Murid herpesvirus 4	NC_001826	vertebrates	2	Herpesviridae,Rhadinovirus,Murid herpesvirus 4	-	U97553,AF105037
Murid herpesvirus 8	NC_019559	vertebrates	1	Herpesviridae,Muromegalovirus,Murid herpesvirus 8	-	JX867617
Murine adenovirus 2	NC_014899	vertebrates	1	Adenoviridae,Mastadenovirus,Murine adenovirus B	-	HM049560
Murine adenovirus 3	NC_012584	vertebrates	1	Adenoviridae,Mastadenovirus,Murine adenovirus C	-	EU835513
Murine adenovirus A	NC_000942	vertebrates	1	Adenoviridae,Mastadenovirus,Murine adenovirus A	-	M22245
Murine astrovirus	NC_018702	vertebrates	2	Astroviridae,,Murine astrovirus	-	JX544744,JX544743
Murine coronavirus	NC_012936,NC_001846	vertebrates	6	Coronaviridae,Betacoronavirus,Murine coronavirus	-	JX169866,KF268338,KF268337,KF268339,KF268336,JX169867
Murine coronavirus MHV-1	NC_012936,NC_001846	vertebrates	1	Coronaviridae,Betacoronavirus,Murine coronavirus	-	FJ647223
Murine coronavirus MHV-3	NC_012936,NC_001846	vertebrates	1	Coronaviridae,Betacoronavirus,Murine coronavirus	-	FJ647224
Murine coronavirus MHV-JHM.IA	NC_012936,NC_001846	vertebrates	1	Coronaviridae,Betacoronavirus,Murine coronavirus	-	FJ647226
Murine coronavirus RA59/R13	NC_012936,NC_001846	vertebrates	1	Coronaviridae,Betacoronavirus,Murine coronavirus	-	FJ647218
Murine coronavirus RA59/SJHM	NC_012936,NC_001846	vertebrates	1	Coronaviridae,Betacoronavirus,Murine coronavirus	-	FJ647220
Murine coronavirus RJHM/A	NC_012936,NC_001846	vertebrates	1	Coronaviridae,Betacoronavirus,Murine coronavirus	-	FJ647219
Murine coronavirus SA59/RJHM	NC_012936,NC_001846	vertebrates	1	Coronaviridae,Betacoronavirus,Murine coronavirus	-	FJ647222
Murine coronavirus inf-MHV-A59	NC_012936,NC_001846	vertebrates	1	Coronaviridae,Betacoronavirus,Murine coronavirus	-	FJ647225
Murine coronavirus repA59/RJHM	NC_012936,NC_001846	vertebrates	1	Coronaviridae,Betacoronavirus,Murine coronavirus	-	FJ647221
Murine coronavirus repJHM/RA59	NC_012936,NC_001846	vertebrates	1	Coronaviridae,Betacoronavirus,Murine coronavirus	-	FJ647227
Murine cytomegalovirus (strain K181)	NC_004065	vertebrates	1	Herpesviridae,Muromegalovirus,Murid herpesvirus 1	-	AM886412
Murine hepatitis virus	NC_012936,NC_001846	vertebrates	5	Coronaviridae,Betacoronavirus,Murine coronavirus	-	AY700211,AF208067,AB551247,AF208066,GU593319
Murine hepatitis virus strain 2	NC_012936,NC_001846	vertebrates	1	Coronaviridae,Betacoronavirus,Murine coronavirus	-	AF201929
Murine hepatitis virus strain A59	NC_012936,NC_001846	vertebrates	2	Coronaviridae,Betacoronavirus,Murine coronavirus	-	FJ884686,FJ884687
Murine hepatitis virus strain ML-11	NC_012936,NC_001846	vertebrates	1	Coronaviridae,Betacoronavirus,Murine coronavirus	-	AF207902
Murine hepatitis virus strain S/3239-17	NC_012936,NC_001846	vertebrates	1	Coronaviridae,Betacoronavirus,Murine coronavirus	-	JQ173883
Murine leukemia virus	NC_001702,NC_001819,NC_001362,NC_001501	vertebrates	12	Retroviridae,Gammaretrovirus,Murine leukemia virus	-	AB187566,Y13893,M87550,DQ366149,AY252102,AF019230,AB187565,AY818896,AF169256,K03363,U13766,J02255
Murine leukemia virus N417	NC_001702,NC_001819,NC_001362,NC_001501	vertebrates	1	Retroviridae,Gammaretrovirus,Murine leukemia virus	-	HQ246218
Murine norovirus	NC_008311	vertebrates	8	Caliciviridae,Norovirus,Murine norovirus	-	EF531291,AB435514,AB435515,JX048594,DQ911368,EF531290,HQ317203,AB601769
Murine norovirus 1	NC_008311	vertebrates	13	Caliciviridae,Norovirus,Murine norovirus	-	EU004660,EU004654,EF014462,EU004662,EU004661,EU004659,AY228235,EU004656,EU004657,DQ285629,EU004655,EU004658,KC782764
Murine norovirus 2	NC_008311	vertebrates	1	Caliciviridae,Norovirus,Murine norovirus	-	DQ223041
Murine norovirus 3	NC_008311	vertebrates	4	Caliciviridae,Norovirus,Murine norovirus	-	KC792553,DQ223042,FJ446720,JQ658375
Murine norovirus 4	NC_008311	vertebrates	2	Caliciviridae,Norovirus,Murine norovirus	-	DQ223043,FJ446719
Murine norovirus GV/CR1/2005/USA	NC_008311	vertebrates	1	Caliciviridae,Norovirus,Murine norovirus	-	EU004672
Murine norovirus GV/CR10/2005/USA	NC_008311	vertebrates	1	Caliciviridae,Norovirus,Murine norovirus	-	EU004678
Murine norovirus GV/CR11/2005/USA	NC_008311	vertebrates	1	Caliciviridae,Norovirus,Murine norovirus	-	EU004679
Murine norovirus GV/CR13/2005/USA	NC_008311	vertebrates	1	Caliciviridae,Norovirus,Murine norovirus	-	EU004680
Murine norovirus GV/CR15/2005/USA	NC_008311	vertebrates	1	Caliciviridae,Norovirus,Murine norovirus	-	EU004681
Murine norovirus GV/CR17/2005/USA	NC_008311	vertebrates	1	Caliciviridae,Norovirus,Murine norovirus	-	EU004682
Murine norovirus GV/CR18/2005/DEU	NC_008311	vertebrates	1	Caliciviridae,Norovirus,Murine norovirus	-	EU004683
Murine norovirus GV/CR3/2005/USA	NC_008311	vertebrates	1	Caliciviridae,Norovirus,Murine norovirus	-	EU004673
Murine norovirus GV/CR4/2005/USA	NC_008311	vertebrates	1	Caliciviridae,Norovirus,Murine norovirus	-	EU004674
Murine norovirus GV/CR5/2005/USA	NC_008311	vertebrates	1	Caliciviridae,Norovirus,Murine norovirus	-	EU004675
Murine norovirus GV/CR6/2005/USA	NC_008311	vertebrates	2	Caliciviridae,Norovirus,Murine norovirus	-	EU004676,JQ237823
Murine norovirus GV/CR7/2005/USA	NC_008311	vertebrates	1	Caliciviridae,Norovirus,Murine norovirus	-	EU004677
Murine norovirus GV/NIH-2409/2005/USA	NC_008311	vertebrates	1	Caliciviridae,Norovirus,Murine norovirus	-	JF320644
Murine norovirus GV/NIH-2410/2005/USA	NC_008311	vertebrates	1	Caliciviridae,Norovirus,Murine norovirus	-	JF320645
Murine norovirus GV/NIH-2411/2005/USA	NC_008311	vertebrates	1	Caliciviridae,Norovirus,Murine norovirus	-	JF320646
Murine norovirus GV/NIH-2747/2005/USA	NC_008311	vertebrates	1	Caliciviridae,Norovirus,Murine norovirus	-	JF320647
Murine norovirus GV/NIH-2750/2005/USA	NC_008311	vertebrates	1	Caliciviridae,Norovirus,Murine norovirus	-	JF320648
Murine norovirus GV/NIH-4421/2005/USA	NC_008311	vertebrates	1	Caliciviridae,Norovirus,Murine norovirus	-	JF320649
Murine norovirus GV/NIH-4428/2005/USA	NC_008311	vertebrates	1	Caliciviridae,Norovirus,Murine norovirus	-	JF320650
Murine norovirus GV/NIH-4431/2005/USA	NC_008311	vertebrates	1	Caliciviridae,Norovirus,Murine norovirus	-	JF320651
Murine norovirus GV/NIH-A114/2006/USA	NC_008311	vertebrates	1	Caliciviridae,Norovirus,Murine norovirus	-	JF320652
Murine norovirus GV/NIH-D220/2007/USA	NC_008311	vertebrates	1	Caliciviridae,Norovirus,Murine norovirus	-	JF320653
Murine norovirus GV/WU11/2005/USA	NC_008311	vertebrates	1	Caliciviridae,Norovirus,Murine norovirus	-	EU004663
Murine norovirus GV/WU12/2005/USA	NC_008311	vertebrates	1	Caliciviridae,Norovirus,Murine norovirus	-	EU004664
Murine norovirus GV/WU20/2005/USA	NC_008311	vertebrates	1	Caliciviridae,Norovirus,Murine norovirus	-	EU004665
Murine norovirus GV/WU21/2005/USA	NC_008311	vertebrates	1	Caliciviridae,Norovirus,Murine norovirus	-	EU004666
Murine norovirus GV/WU22/2005/USA	NC_008311	vertebrates	1	Caliciviridae,Norovirus,Murine norovirus	-	EU004667
Murine norovirus GV/WU23/2005/USA	NC_008311	vertebrates	1	Caliciviridae,Norovirus,Murine norovirus	-	EU004668
Murine norovirus GV/WU24/2005/USA	NC_008311	vertebrates	1	Caliciviridae,Norovirus,Murine norovirus	-	EU004669
Murine norovirus GV/WU25/2005/USA	NC_008311	vertebrates	1	Caliciviridae,Norovirus,Murine norovirus	-	EU004670
Murine norovirus GV/WU26/2005/USA	NC_008311	vertebrates	1	Caliciviridae,Norovirus,Murine norovirus	-	EU004671
Murine osteosarcoma virus	NC_001506	vertebrates	1	Retroviridae,Gammaretrovirus,Murine osteosarcoma virus	-	AF033814
Murine pneumotropic virus	NC_001505	vertebrates	2	Polyomaviridae,Polyomavirus,Murine pneumotropic virus	-	M55904,EF186666
Murine polyomavirus	NC_001515	vertebrates	3	Polyomaviridae,Polyomavirus,Murine polyomavirus	-	U27812,U27813,J02288
Murine polyomavirus strain A3	NC_001515	vertebrates	1	Polyomaviridae,Polyomavirus,Murine polyomavirus	-	J02289
Murine polyomavirus strain BG	NC_001515	vertebrates	1	Polyomaviridae,Polyomavirus,Murine polyomavirus	-	AF442959
Murine type C retrovirus	NC_001702,NC_001819,NC_001362,NC_001501	vertebrates	1	Retroviridae,Gammaretrovirus,Murine leukemia virus	-	X94150
Muromegalovirus C4A	NC_004065	vertebrates	1	Herpesviridae,Muromegalovirus,Murid herpesvirus 1	-	EU579861
Muromegalovirus G4	NC_004065	vertebrates	1	Herpesviridae,Muromegalovirus,Murid herpesvirus 1	-	EU579859
Muromegalovirus WP15B	NC_004065	vertebrates	1	Herpesviridae,Muromegalovirus,Murid herpesvirus 1	-	EU579860
Mus dunni endogenous virus	NC_001702,NC_001819,NC_001362,NC_001501	vertebrates	1	Retroviridae,Gammaretrovirus,Murine leukemia virus	-	AF053745
Muscovy duck circovirus	NC_005053,NC_007220,NC_006561	vertebrates	17	Circoviridae,Circovirus,Duck circovirus	-	GQ423743,GQ868757,GQ423746,HQ180265,GU168779,EF370476,DQ166836,DQ166838,GQ423742,DQ166837,GQ423744,GQ334371,FJ554673,GQ423741,EF451157,JX499186,GQ423745
Muscovy duck parvovirus	NC_006147	vertebrates	3	Parvoviridae,Dependovirus,Duck parvovirus	-	KC171936,X75093,U22967
Muscovy duck reovirus	NC_015126	vertebrates	3	Reoviridae,Orthoreovirus,Avian orthoreovirus	segment L1	KC508647,KF306082,JX478260
Muscovy duck reovirus	NC_015127	vertebrates	3	Reoviridae,Orthoreovirus,Avian orthoreovirus	segment L2	KC508648,JX478261,KF306083
Muscovy duck reovirus	NC_015128	vertebrates	3	Reoviridae,Orthoreovirus,Avian orthoreovirus	segment L3	KC508649,JX478262,KF306084
Muscovy duck reovirus	NC_015129	vertebrates	3	Reoviridae,Orthoreovirus,Avian orthoreovirus	segment M1	KC508650,KF306085,JX478263
Muscovy duck reovirus	NC_015130	vertebrates	4	Reoviridae,Orthoreovirus,Avian orthoreovirus	segment M2	KF306086,KC756359,KC508651,JX478264
Muscovy duck reovirus	NC_015131	vertebrates	3	Reoviridae,Orthoreovirus,Avian orthoreovirus	segment M3	KC508652,JX478265,KF306087
Muscovy duck reovirus	NC_015132	vertebrates	4	Reoviridae,Orthoreovirus,Avian orthoreovirus	segment S1	DQ198854,KC508653,KF306088,DQ191363
Muscovy duck reovirus	NC_015133	vertebrates	4	Reoviridae,Orthoreovirus,Avian orthoreovirus	segment S2	DQ198857,KC508654,KF306089,JX478267
Muscovy duck reovirus	NC_015134	vertebrates	3	Reoviridae,Orthoreovirus,Avian orthoreovirus	segment S3	KC508655,JX478268,KF306090
Muscovy duck reovirus	NC_015135	vertebrates	2	Reoviridae,Orthoreovirus,Avian orthoreovirus	segment S4	KF306091,JX478269
Muscovy duck reovirus 89330	NC_015131	vertebrates	1	Reoviridae,Orthoreovirus,Avian orthoreovirus	segment M3	AJ293969
Muscovy duck reovirus S14	NC_015130	vertebrates	1	Reoviridae,Orthoreovirus,Avian orthoreovirus	segment M2	DQ989557
Myotis polyomavirus VM-2008	NC_011310	vertebrates	1	Polyomaviridae,Polyomavirus,Bat polyomavirus	-	FJ188392
Myxoma virus	NC_001132	vertebrates	34	Poxviridae,Leporipoxvirus,Myxoma virus	-	JX565567,EU552530,JX565566,JX565573,KC660080,KC660082,JX565565,JX565574,JX565568,JX565580,JX565564,JX565569,KC660083,KC660079,KC660084,AF170726,KC660081,JX565571,JX565570,JX565572,KF148065,JX565582,JX565579,GQ409969,JX565575,JX565578,JX565563,KC660085,JX565584,JX565577,JX565583,JX565562,JX565581,JX565576
Night-heron coronavirus HKU19	NC_016994	vertebrates	1	Coronaviridae,Deltacoronavirus,Night-heron coronavirus HKU19	-	JQ065047
Nile crocodilepox virus	NC_008030	vertebrates	1	Poxviridae,Crocodylidpoxvirus,Nile crocodilepox virus	-	DQ356948
Old World harvest mouse papillomavirus	NC_008582,NC_014326	vertebrates	1	Papillomaviridae,Pipapillomavirus,Pipapillomavirus 2	-	DQ269468
Orange-spotted grouper iridovirus	NC_003494	vertebrates	1	Iridoviridae,Megalocytivirus,Infectious spleen and kidney necrosis virus	-	AY894343
Orangutan polyomavirus	NC_013439	vertebrates	2	Polyomaviridae,Polyomavirus,Orangutan polyomavirus	-	FN356900,FN356901
Orf virus	NC_005336	vertebrates	4	Poxviridae,Parapoxvirus,Orf virus	-	DQ184476,AY386263,HM133903,AY386264
Otomops polyomavirus 1	NC_020071	vertebrates	1	Polyomaviridae,Polyomavirus,Otomops polyomavirus 1	-	JX520664
Otomops polyomavirus 2	NC_020066	vertebrates	1	Polyomaviridae,Polyomavirus,Otomops polyomavirus 2	-	JX520658
Ovine adenovirus A	NC_002513	vertebrates	1	Adenoviridae,Mastadenovirus,Ovine adenovirus A	-	AF252854
Ovine adenovirus D	NC_004037	vertebrates	1	Adenoviridae,Atadenovirus,Ovine adenovirus D	-	U40839
Ovine enterovirus	NC_004441	vertebrates	1	Picornaviridae,Enterovirus,Enterovirus G	-	JQ277724
Ovine enzootic nasal tumor virus	NC_007015	vertebrates	6	Retroviridae,Betaretrovirus,Ovine enzootic nasal tumor virus	-	GU292317,GU292315,KC189895,GU292314,GU292318,GU292316
Ovine enzootic nasal tumour virus	NC_007015	vertebrates	1	Retroviridae,Betaretrovirus,Ovine enzootic nasal tumor virus	-	Y16627
Ovine herpesvirus 2	NC_007646	vertebrates	2	Herpesviridae,Macavirus,Ovine herpesvirus 2	-	AY839756,DQ198083
Ovine lentivirus	NC_001511	vertebrates	3	Retroviridae,Lentivirus,Ovine lentivirus	-	AF479638,M31646,M34193
Ovine papillomavirus - 1	NC_001789	vertebrates	1	Papillomaviridae,Deltapapillomavirus,Deltapapillomavirus 3	-	U83594
Ovine papillomavirus type 2	NC_001789	vertebrates	1	Papillomaviridae,Deltapapillomavirus,Deltapapillomavirus 3	-	U83595
PRCV ISU-1	NC_002306	vertebrates	1	Coronaviridae,Alphacoronavirus,Alphacoronavirus 1	-	DQ811787
PRRSV HB-1(sh)/2002	NC_001961	vertebrates	1	Arteriviridae,Arterivirus,Porcine reproductive and respiratory syndrome virus	-	AY150312
PRRSV HB-2(sh)/2002	NC_001961	vertebrates	1	Arteriviridae,Arterivirus,Porcine reproductive and respiratory syndrome virus	-	AY262352
PRRSV HN1	NC_001961	vertebrates	1	Arteriviridae,Arterivirus,Porcine reproductive and respiratory syndrome virus	-	AY457635
PRRSV LV4.2.1	NC_001961	vertebrates	1	Arteriviridae,Arterivirus,Porcine reproductive and respiratory syndrome virus	-	AY588319
Pan troglodytes schweinfurthii polyomavirus 2	NC_019858	vertebrates	1	Polyomaviridae,Polyomavirus,Pan troglodytes schweinfurthii polyomavirus 2	-	JX159983
Pan troglodytes verus polyomavirus 3	NC_019855	vertebrates	1	Polyomaviridae,Polyomavirus,Pan troglodytes verus polyomavirus 3	-	JX159980
Pan troglodytes verus polyomavirus 4	NC_019856	vertebrates	1	Polyomaviridae,Polyomavirus,Pan troglodytes verus polyomavirus 4	-	JX159981
Pan troglodytes verus polyomavirus 5	NC_019857	vertebrates	1	Polyomaviridae,Polyomavirus,Pan troglodytes verus polyomavirus 5	-	JX159982
Panine herpesvirus 2	NC_003521	vertebrates	1	Herpesviridae,Cytomegalovirus,Panine herpesvirus 2	-	AF480884
Panthera leo persica papillomavirus type 1	NC_004765	vertebrates	1	Papillomaviridae,Lambdapapillomavirus,Lambdapapillomavirus 1	-	AY904724
Papiine herpesvirus 2	NC_007653	vertebrates	1	Herpesviridae,Simplexvirus,Papiine herpesvirus 2	-	DQ149153
Papio hamadryas papillomavirus type 1	NC_017716	vertebrates	1	Papillomaviridae,,Papio hamadryas papillomavirus type 1	-	JF304764
Paralichthys olivaceus birnavirus	NC_009923	vertebrates	1	Birnaviridae,Aquabirnavirus,Paralichthys olivaceus birnavirus	segment A	EU161285
Paralichthys olivaceus birnavirus	NC_009924	vertebrates	1	Birnaviridae,Aquabirnavirus,Paralichthys olivaceus birnavirus	segment B	EU161286
Parrot hepatitis B virus	NC_016561	vertebrates	19	Hepadnaviridae,Avihepadnavirus,Parrot hepatitis B virus	-	JX274035,JX274023,JX274021,JX274029,JX274030,JX274019,JN565944,JX274032,JX274034,JX274033,JX274027,JX274026,JX274018,JX274024,JX274020,JX274022,JX274031,JX274028,JX274025
Parvo-like hybrid virus UC1	NC_022089	vertebrates	1	Parvoviridae,,Parvovirus NIH-CQV	-	KF170373
Parvo-like hybrid virus UC11	NC_022089	vertebrates	1	Parvoviridae,,Parvovirus NIH-CQV	-	KF214638
Parvo-like hybrid virus UC4	NC_022089	vertebrates	1	Parvoviridae,,Parvovirus NIH-CQV	-	KF214645
Parvo-like hybrid virus UC9	NC_022089	vertebrates	1	Parvoviridae,,Parvovirus NIH-CQV	-	KF214640
Parvovirus NIH-CQV	NC_022089	vertebrates	1	Parvoviridae,,Parvovirus NIH-CQV	-	KC617868
Pegivirus A	NC_001837	vertebrates	1	Flaviviridae,Pegivirus,Pegivirus A	-	U94421
Penaeus monodon circovirus VN11	NC_022897	vertebrates	1	Circoviridae,Circovirus,Penaeus monodon circovirus VN11	-	KF481961
Penaeus monodon hepatopancreatic parvovirus	NC_011545	vertebrates	1	Parvoviridae,Parvovirus,Penaeus monodon hepatopancreatic parvovirus	-	FJ410797
Perch rhabdovirus	NC_020803	vertebrates	1	Rhabdoviridae,Perhabdovirus,Perch rhabdovirus	-	JX679246
Pestivirus Giraffe-1	NC_003678	vertebrates	1	Flaviviridae,Pestivirus,Pestivirus Giraffe-1	-	AF144617
Pestivirus reindeer-1 V60-Krefeld	NC_003679	vertebrates	1	Flaviviridae,Pestivirus,Border disease virus	-	AF144618
Pestivirus strain Aydin/04-TR	NC_018713	vertebrates	1	Flaviviridae,Pestivirus,Pestivirus strain Aydin/04-TR	-	JX428945
Phocoena phocoena papillomavirus 1	NC_018074	vertebrates	1	Papillomaviridae,,Phocoena phocoena papillomavirus 1	-	GU117621
Phocoena phocoena papillomavirus 2	NC_018075	vertebrates	1	Papillomaviridae,,Phocoena phocoena papillomavirus 2	-	GU117622
Phocoena phocoena papillomavirus 4	NC_018076	vertebrates	1	Papillomaviridae,,Phocoena phocoena papillomavirus 4	-	GU117623
Phocoena spinipinnis papillomavirus	NC_003348	vertebrates	1	Papillomaviridae,Omikronpapillomavirus,Omikronpapillomavirus 1	-	AJ238373
Pigeon picornavirus B	NC_015626	vertebrates	2	Picornaviridae,,Pigeon picornavirus B	-	KC560801,FR727144
Piliocolobus rufomitratus polyomavirus 1	NC_019850	vertebrates	1	Polyomaviridae,Polyomavirus,Piliocolobus rufomitratus polyomavirus 1	-	JX159984
Pipistrellus bat coronavirus HKU5	NC_009020	vertebrates	1	Coronaviridae,Betacoronavirus,Pipistrellus bat coronavirus HKU5	-	EF065509
Polyomavirus HPyV6	NC_014406	vertebrates	6	Polyomaviridae,Polyomavirus,Polyomavirus HPyV6	-	HM011559,HM011558,HM011560,HM011562,HM011561,HM011563
Polyomavirus HPyV7	NC_014407	vertebrates	6	Polyomaviridae,Polyomavirus,Polyomavirus HPyV7	-	HM011566,HM011568,HM011565,HM011569,HM011564,HM011567
Porcine adenovirus C	NC_002702	vertebrates	1	Adenoviridae,Mastadenovirus,Porcine adenovirus C	-	AF289262
Porcine astrovirus 3	NC_019494	vertebrates	1	Astroviridae,Mamastrovirus,Porcine astrovirus 3	-	JX556691
Porcine bocavirus 3	NC_016031	vertebrates	4	Parvoviridae,Bocavirus,Porcine bocavirus 3	-	JF713715,JF429834,JF713714,KC473563
Porcine bocavirus 3C	NC_016031	vertebrates	1	Parvoviridae,Bocavirus,Porcine bocavirus 3	-	JN681175
Porcine bocavirus 4-1	NC_016032	vertebrates	1	Parvoviridae,Bocavirus,Porcine bocavirus 4	-	JF429835
Porcine bocavirus 4-2	NC_016032	vertebrates	1	Parvoviridae,Bocavirus,Porcine bocavirus 4	-	JF429836
Porcine bocavirus 5/JS677	NC_016647	vertebrates	1	Parvoviridae,Bocavirus,Porcine bocavirus 5/JS677	-	JN831651
Porcine circovirus	NC_013774	vertebrates	2	Circoviridae,Circovirus,Porcine circovirus type 1/2a	-	FJ790425,FJ655419
Porcine circovirus 1	NC_001792	vertebrates	51	Circoviridae,Circovirus,Porcine circovirus 1	-	DQ472013,DQ472012,FJ475129,GU799575,AY099501,DQ472014,AF012107,KC924758,FJ159689,JX566507,EF533941,DQ472016,DQ659153,GU371908,DQ659154,AY754012,DQ494787,JN398656,KC878437,JN133302,AY660574,KC527543,AY699796,DQ650650,FJ159693,KC733436,FJ159690,Y09921,AY184287,KC990120,AY193712,DQ472015,AY754013,AF071879,GU722334,FJ159692,EF493843,KC894933,KC447455,KF732857,AY219836,DQ358813,FJ159691,JN133303,DQ648…
Porcine circovirus 2	NC_005148	vertebrates	1115	Circoviridae,Circovirus,Porcine circovirus 2	-	JX912914,KC800642,FJ660970,EF524519,DQ910865,KC800640,JX948775,FJ870971,FJ948167,EU148504,EF452350,JX982222,FJ905468,EF524528,HQ831529,HM000100,EF524517,EF565347,AY484409,AY099496,EU450590,EF565343,AY682996,HM009338,HQ738639,EF421969,DQ220736,JQ390467,DQ861899,JF690914,KF850458,GU370064,HQ148879,HM009337,DQ201640,AY256459,EF565359,KF850460,FJ870967,KF027494,JQ809463,FJ667585,AF264041,KF742549,KC8…
Porcine circovirus 2 P0404c/03	NC_005148	vertebrates	1	Circoviridae,Circovirus,Porcine circovirus 2	-	EU057185
Porcine circovirus 2 R0255/209/03	NC_005148	vertebrates	1	Circoviridae,Circovirus,Porcine circovirus 2	-	EU057189
Porcine circovirus 2 S0255/210/03	NC_005148	vertebrates	1	Circoviridae,Circovirus,Porcine circovirus 2	-	EU057188
Porcine circovirus 2 T0181c/03	NC_005148	vertebrates	1	Circoviridae,Circovirus,Porcine circovirus 2	-	EU057186
Porcine circovirus 2 U0168/03	NC_005148	vertebrates	1	Circoviridae,Circovirus,Porcine circovirus 2	-	EU057187
Porcine circovirus 2 Z0161b/03	NC_005148	vertebrates	1	Circoviridae,Circovirus,Porcine circovirus 2	-	EU057184
Porcine circovirus 2 strain SD3	NC_005148	vertebrates	1	Circoviridae,Circovirus,Porcine circovirus 2	-	DQ218419
Porcine circovirus 2 strain SD5	NC_005148	vertebrates	1	Circoviridae,Circovirus,Porcine circovirus 2	-	DQ218420
Porcine circovirus 2 strain SD6	NC_005148	vertebrates	1	Circoviridae,Circovirus,Porcine circovirus 2	-	DQ218421
Porcine circovirus type 1/2a	NC_013774	vertebrates	1	Circoviridae,Circovirus,Porcine circovirus type 1/2a	-	FJ655418
Porcine circovirus type 2-B	NC_005148	vertebrates	4	Circoviridae,Circovirus,Porcine circovirus 2	-	KC261601,KC261600,AF112862,GU799576
Porcine circovirus type 2-C	NC_005148	vertebrates	1	Circoviridae,Circovirus,Porcine circovirus 2	-	AF109398
Porcine circovirus type 2-D	NC_005148	vertebrates	1	Circoviridae,Circovirus,Porcine circovirus 2	-	AF117753
Porcine circovirus type 2-E	NC_005148	vertebrates	1	Circoviridae,Circovirus,Porcine circovirus 2	-	AF109399
Porcine coronavirus HKU15	NC_016990	vertebrates	2	Coronaviridae,Deltacoronavirus,Porcine coronavirus HKU15	-	JQ065043,JQ065042
Porcine cytomegalovirus	NC_022233	vertebrates	1	Herpesviridae,Cytomegalovirus,Porcine cytomegalovirus	-	KF017583
Porcine encephalomyocarditis virus	NC_001479	vertebrates	2	Picornaviridae,Cardiovirus,Encephalomyocarditis virus	-	DQ517424,HM641897
Porcine endogenous retrovirus	NC_003059	vertebrates	5	Retroviridae,Gammaretrovirus,Porcine type-C oncovirus	-	EU523109,A66553,AX052638,A66552,AX175461
Porcine endogenous retrovirus C	NC_003059	vertebrates	2	Retroviridae,Gammaretrovirus,Porcine type-C oncovirus	-	EF133960,HM159246
Porcine endogenous retrovirus C/A	NC_003059	vertebrates	2	Retroviridae,Gammaretrovirus,Porcine type-C oncovirus	-	AY953542,AY570980
Porcine endogenous retrovirus E	NC_003059	vertebrates	1	Retroviridae,Gammaretrovirus,Porcine type-C oncovirus	-	AF356697
Porcine enterovirus 10	NC_004441	vertebrates	1	Picornaviridae,Enterovirus,Enterovirus G	-	AF363455
Porcine enterovirus 15	NC_004441	vertebrates	1	Picornaviridae,Enterovirus,Enterovirus G	-	JN807387
Porcine enterovirus 3H	NC_004441	vertebrates	1	Picornaviridae,Enterovirus,Enterovirus G	-	HQ702854
Porcine enterovirus 9	NC_004441	vertebrates	2	Picornaviridae,Enterovirus,Enterovirus G	-	Y14459,HM131607
Porcine enterovirus B	NC_004441	vertebrates	2	Picornaviridae,Enterovirus,Enterovirus G	-	AF363453,JQ818253
Porcine epidemic diarrhea virus	NC_003436	vertebrates	32	Coronaviridae,Alphacoronavirus,Porcine epidemic diarrhea virus	-	KF272920,KF650374,KF650372,KC140102,JQ282909,EF185992,KC210145,KF468752,KC210147,KF650371,KC109141,JN547228,JX112709,KF468753,JX524137,JX560761,KC196276,KC189944,JX188454,KC210146,JX489155,JX088695,KF650370,KF384500,JX261936,KF650375,AF353511,KF650373,KF468754,JN825712,GU937797,KF267450
Porcine kobuvirus	NC_011829,NC_016769	vertebrates	9	Picornaviridae,Kobuvirus,Aichivirus C	-	KC424638,JX401523,JX177612,KC424639,KF695124,KC204684,JQ692069,KC424640,JX827598
Porcine kobuvirus swine/K-30-HUN/2008/HUN	NC_011829,NC_016769	vertebrates	1	Picornaviridae,Kobuvirus,Aichivirus C	-	GQ249161
Porcine kobuvirus swine/S-1-HUN/2007/Hungary	NC_011829,NC_016769	vertebrates	1	Picornaviridae,Kobuvirus,Aichivirus C	-	EU787450
Porcine partetravirus	NC_022104	vertebrates	1	Parvoviridae,,Porcine partetravirus	-	KC992732
Porcine parvovirus	NC_001718	vertebrates	26	Parvoviridae,Parvovirus,Porcine parvovirus	-	KF913346,KF913348,KF429253,AY684869,EU790641,JN872448,M38367,L23427,JX992846,KF913345,KF913349,U44978,KF913347,KF913351,AY583318,KF429252,EU790642,FJ822038,DQ675456,KF913350,D00623,JN968975,KF429255,KF742500,HM989009,KF429254
Porcine parvovirus 4	NC_014665	vertebrates	9	Parvoviridae,Parvovirus,Porcine parvovirus 4	-	GQ387500,GU978965,GU978968,HM031134,GU978966,GU978967,GQ387499,GU978964,HM031135
Porcine parvovirus 5	NC_023020	vertebrates	6	Parvoviridae,Parvovirus,Porcine parvovirus 5	-	JX896320,KF661535,JX896322,JX896319,JX896321,JX896318
Porcine pestivirus isolate Bungowannah	NC_023176	vertebrates	1	Flaviviridae,Pestivirus,Porcine pestivirus isolate Bungowannah	-	EF100713
Porcine reovirus SHR-A	NC_004274	vertebrates	1	Reoviridae,Orthoreovirus,Mammalian orthoreovirus	segment L3	JX415472
Porcine reovirus SHR-A	NC_004275	vertebrates	1	Reoviridae,Orthoreovirus,Mammalian orthoreovirus	segment L2	JX415467
Porcine reovirus SHR-A	NC_004276	vertebrates	1	Reoviridae,Orthoreovirus,Mammalian orthoreovirus	segment S4	JX415473
Porcine reovirus SHR-A	NC_004277	vertebrates	1	Reoviridae,Orthoreovirus,Mammalian orthoreovirus	segment S1	JX415469
Porcine reovirus SHR-A	NC_004278	vertebrates	1	Reoviridae,Orthoreovirus,Mammalian orthoreovirus	segment M2	JX415471
Porcine reovirus SHR-A	NC_004279	vertebrates	1	Reoviridae,Orthoreovirus,Mammalian orthoreovirus	segment S2	JX415465
Porcine reovirus SHR-A	NC_004280	vertebrates	1	Reoviridae,Orthoreovirus,Mammalian orthoreovirus	segment M1	JX415468
Porcine reovirus SHR-A	NC_004281	vertebrates	1	Reoviridae,Orthoreovirus,Mammalian orthoreovirus	segment M3	JX415474
Porcine reovirus SHR-A	NC_004282	vertebrates	1	Reoviridae,Orthoreovirus,Mammalian orthoreovirus	segment L1	JX415466
Porcine reovirus SHR-A	NC_004283	vertebrates	1	Reoviridae,Orthoreovirus,Mammalian orthoreovirus	segment S3	JX415470
Porcine reovirus SHR-A	NC_013228	vertebrates	1	Reoviridae,Orthoreovirus,Mammalian orthoreovirus	segment M2	JX415471
Porcine reovirus SHR-A	NC_013230	vertebrates	1	Reoviridae,Orthoreovirus,Mammalian orthoreovirus	segment M3	JX415474
Porcine reovirus SHR-A	NC_013232	vertebrates	1	Reoviridae,Orthoreovirus,Mammalian orthoreovirus	segment S2	JX415465
Porcine reovirus SHR-A	NC_013234	vertebrates	1	Reoviridae,Orthoreovirus,Mammalian orthoreovirus	segment S4	JX415473
Porcine reproductive and respiratory syndrome virus	NC_001961	vertebrates	327	Arteriviridae,Arterivirus,Porcine reproductive and respiratory syndrome virus	-	HQ843178,JQ663542,JQ663545,GU737264,FJ950746,EU262603,KF287142,EF517962,EU200962,JQ309822,JQ308798,FJ950747,HQ699067,KC422730,KC862570,DQ176020,KC862567,HM214915,JX192638,GU047344,EU880438,JQ326271,KF287133,GU168568,EU187484,JN660150,JX192637,GU143913,JX317648,EU880436,EF536000,JQ663561,EU200961,JF268681,DQ459471,KC862574,GQ475526,HQ315836,EU106888,KC492506,JQ663541,EU864232,EU097707,EF484031,KC4…
Porcine sapelovirus	NC_003987	vertebrates	3	Picornaviridae,Sapelovirus,Porcine sapelovirus	-	HQ875059,KF539414,JX286666
Porcine sapelovirus 1	NC_003987	vertebrates	1	Picornaviridae,Sapelovirus,Porcine sapelovirus	-	AF406813
Porcine teschovirus	NC_003985	vertebrates	30	Picornaviridae,Teschovirus,Porcine teschovirus	-	AF296102,GQ914053,AF231769,AF296118,AF296111,AF296112,AF296113,HQ020378,AF296107,AF296092,AF296103,AF296115,KC667563,JQ429405,AF296089,AF296091,GU446660,AF231767,AF296090,AF296109,AF296104,AF231768,AJ011380,AF296100,DQ355222,AF296087,AF296088,AF296117,KC667562,AF296108
Porcine teschovirus 1	NC_003985	vertebrates	1	Picornaviridae,Teschovirus,Porcine teschovirus	-	AB038528
Porcine teschovirus 10	NC_003985	vertebrates	2	Picornaviridae,Teschovirus,Porcine teschovirus	-	AF296119,AF296095
Porcine teschovirus 11	NC_003985	vertebrates	1	Picornaviridae,Teschovirus,Porcine teschovirus	-	AF296096
Porcine teschovirus 4	NC_003985	vertebrates	1	Picornaviridae,Teschovirus,Porcine teschovirus	-	JQ975417
Porcine teschovirus 8	NC_003985	vertebrates	5	Picornaviridae,Teschovirus,Porcine teschovirus	-	JQ664746,GQ293092,KC757344,AF296093,JN710381
Porcine teschovirus 9	NC_003985	vertebrates	1	Picornaviridae,Teschovirus,Porcine teschovirus	-	AF296094
Porcine torovirus	NC_022787	vertebrates	1	Coronaviridae,Torovirus,Porcine torovirus	-	JQ860350
Possum enterovirus W1	NC_008714	vertebrates	1	Picornaviridae,Enterovirus,Possum enterovirus W1	-	AY462106
Possum enterovirus W6	NC_008715	vertebrates	1	Picornaviridae,Enterovirus,Possum enterovirus W6	-	AY462107
PreXMRV-1	NC_007815	vertebrates	1	Retroviridae,Gammaretrovirus,Murine leukemia-related retroviruses	-	FR871849
Procyon lotor papillomavirus 1	NC_007150	vertebrates	1	Papillomaviridae,Lambdapapillomavirus,Lambdapapillomavirus 4	-	AY763115
Pseudocowpox virus	NC_013804	vertebrates	2	Poxviridae,Parapoxvirus,Pseudocowpox virus	-	GQ329670,GQ329669
Psittacid herpesvirus 1	NC_005264	vertebrates	1	Herpesviridae,Iltovirus,Psittacid herpesvirus 1	-	AY372243
Psittacus erithacus timneh papillomavirus	NC_003973	vertebrates	2	Papillomaviridae,Thetapapillomavirus,Thetapapillomavirus 1	-	AF502599,AF420235
Pteronotus polyomavirus	NC_020070	vertebrates	1	Polyomaviridae,Polyomavirus,Pteronotus polyomavirus	-	JX520662
Puma concolor papillomavirus type 1	NC_004765	vertebrates	1	Papillomaviridae,Lambdapapillomavirus,Lambdapapillomavirus 1	-	AY904723
Pygmy chimpanzee papillomavirus type 1	NC_001355	vertebrates	1	Papillomaviridae,Alphapapillomavirus,Alphapapillomavirus 10	-	X62844
Quail picornavirus QPV1/HUN/2010	NC_016403	vertebrates	1	Picornaviridae,,Quail picornavirus QPV1/HUN/2010	-	JN674502
RD114 retrovirus	NC_009889	vertebrates	2	Retroviridae,Gammaretrovirus,RD114 retrovirus	-	AB559882,EU030001
Rabbit calicivirus Australia 1 MIC-07	NC_011704	vertebrates	1	Caliciviridae,Lagovirus,Rabbit calicivirus Australia 1 MIC-07	-	EU871528
Rabbit coronavirus HKU14	NC_017083	vertebrates	4	Coronaviridae,Betacoronavirus,Rabbit coronavirus HKU14	-	JN874559,JN874562,JN874561,JN874560
Rabbit fibroma virus	NC_001266	vertebrates	1	Poxviridae,Leporipoxvirus,Rabbit fibroma virus	-	AF170722
Rabbit hemorrhagic disease virus	NC_001543	vertebrates	35	Caliciviridae,Lagovirus,Rabbit hemorrhagic disease virus	-	DQ280493,EF363035,EF558586,DQ189077,JX886001,AB300693,EF558576,EF558582,M67473,KC595270,DQ189078,EU003579,EF558572,EF558578,EF558580,EF558574,AF295785,EF558577,AY523410,HM623309,EU003582,EF558585,EU003578,AF258618,DQ205345,EU003581,EF558584,EU003580,EF558579,JF412629,EF558575,EF558581,EF558573,EF558583,JX886002
Rabbit hemorrhagic disease virus-AST89	NC_001543	vertebrates	1	Caliciviridae,Lagovirus,Rabbit hemorrhagic disease virus	-	Z49271
Rabbit hemorrhagic disease virus-BS89	NC_001543	vertebrates	1	Caliciviridae,Lagovirus,Rabbit hemorrhagic disease virus	-	X87607
Rabbit hemorrhagic disease virus-SD	NC_001543	vertebrates	1	Caliciviridae,Lagovirus,Rabbit hemorrhagic disease virus	-	Z29514
Rabbit hemorrhagic disease virus-V351	NC_001543	vertebrates	1	Caliciviridae,Lagovirus,Rabbit hemorrhagic disease virus	-	U54983
Rabbit oral papillomavirus	NC_002232	vertebrates	1	Papillomaviridae,Kappapapillomavirus,Kappapapillomavirus 1	-	AF227240
Rabbit vesivirus	NC_008580	vertebrates	1	Caliciviridae,Vesivirus,Rabbit vesivirus	-	AJ866991
Rana grylio iridovirus	NC_005946	vertebrates	1	Iridoviridae,Ranavirus,Frog virus 3	-	JQ654586
Rangifer tarandus papillomavirus 2	NC_021930	vertebrates	1	Papillomaviridae,,Rangifer tarandus papillomavirus 2	-	KC810012
Ranid herpesvirus 1	NC_008211	vertebrates	1	Alloherpesviridae,Batrachovirus,Ranid herpesvirus 1	-	DQ665917
Ranid herpesvirus 2	NC_008210	vertebrates	1	Alloherpesviridae,Batrachovirus,Ranid herpesvirus 2	-	DQ665652
Raptor adenovirus A	NC_015455	vertebrates	1	Adenoviridae,Siadenovirus,Raptor adenovirus A	-	EU715130
Rat coronavirus	NC_012936,NC_001846	vertebrates	2	Coronaviridae,Betacoronavirus,Murine coronavirus	-	JF792616,JF792617
Rat coronavirus Parker	NC_012936,NC_001846	vertebrates	1	Coronaviridae,Betacoronavirus,Murine coronavirus	-	FJ938068
Rat theilovirus 1	NC_009448,NC_001366,NC_010810	vertebrates	2	Picornaviridae,Cardiovirus,Theilovirus	-	EU542581,EU815052
Rattus norvegicus papillomavirus 1 EES-2009	NC_008519	vertebrates	1	Papillomaviridae,Pipapillomavirus,Pipapillomavirus 1	-	GQ180114
Raven circovirus	NC_008375	vertebrates	1	Circoviridae,Circovirus,Raven circovirus	-	DQ146997
Redspotted grouper nervous necrosis virus	NC_008040	vertebrates	5	Nodaviridae,Betanodavirus,Redspotted grouper nervous necrosis virus	segment RNA 1	GQ402010,AY324869,AY369136,GQ402012,EF558368
Redspotted grouper nervous necrosis virus	NC_008041	vertebrates	6	Nodaviridae,Betanodavirus,Redspotted grouper nervous necrosis virus	segment RNA 2	AY744705,AY324870,GQ402011,EF558369,AY690596,GQ402013
Reindeer papillomavirus	NC_001524	vertebrates	1	Papillomaviridae,Deltapapillomavirus,Deltapapillomavirus 1	-	AF443292
Reovirus sp. T2W	NC_004276	vertebrates	1	Reoviridae,Orthoreovirus,Mammalian orthoreovirus	segment S4	DQ220019
Reovirus sp. T2W	NC_004277	vertebrates	1	Reoviridae,Orthoreovirus,Mammalian orthoreovirus	segment S1	DQ220017
Reovirus sp. T2W	NC_004279	vertebrates	1	Reoviridae,Orthoreovirus,Mammalian orthoreovirus	segment S2	DQ220020
Reovirus sp. T2W	NC_004283	vertebrates	1	Reoviridae,Orthoreovirus,Mammalian orthoreovirus	segment S3	DQ220018
Reovirus sp. T2W	NC_013232	vertebrates	1	Reoviridae,Orthoreovirus,Mammalian orthoreovirus	segment S2	DQ220020
Reovirus sp. T2W	NC_013234	vertebrates	1	Reoviridae,Orthoreovirus,Mammalian orthoreovirus	segment S4	DQ220019
Reovirus sp. T3C43-MA	NC_004277	vertebrates	1	Reoviridae,Orthoreovirus,Mammalian orthoreovirus	segment S1	U74293
Reovirus sp. T3C44-MA	NC_004277	vertebrates	1	Reoviridae,Orthoreovirus,Mammalian orthoreovirus	segment S1	U74292
Reovirus sp. T3C84-MA	NC_004277	vertebrates	1	Reoviridae,Orthoreovirus,Mammalian orthoreovirus	segment S1	U74291
Reptile vesivirus Cro1	NC_002551	vertebrates	1	Caliciviridae,Vesivirus,Vesicular exanthema of swine virus	-	JX047864
Reticuloendotheliosis virus	NC_006934	vertebrates	10	Retroviridae,Gammaretrovirus,Reticuloendotheliosis virus	-	FJ496333,FJ439119,DQ003591,DQ387450,FJ439120,JX912710,GQ375848,GQ415646,KF305089,AY842951
Rhesus monkey papillomavirus 1	NC_001678	vertebrates	1	Papillomaviridae,Alphapapillomavirus,Alphapapillomavirus 12	-	M60184
Rhesus monkey rhadinovirus H26-95	NC_003401	vertebrates	1	Herpesviridae,Rhadinovirus,Macacine herpesvirus 5	-	AF210726
Rhesus papillomavirus type 1b	NC_001678	vertebrates	2	Papillomaviridae,Alphapapillomavirus,Alphapapillomavirus 12	-	EF591300,FJ598133
Rhinolophus bat coronavirus HKU2	NC_009988	vertebrates	4	Coronaviridae,Alphacoronavirus,Rhinolophus bat coronavirus HKU2	-	EF203066,EF203065,EF203067,EF203064
Rhinovirus C	NC_009996	vertebrates	3	Picornaviridae,Enterovirus,Rhinovirus C	-	GQ223228,JX074056,GQ223227
Rock bream iridovirus	NC_003494	vertebrates	2	Iridoviridae,Megalocytivirus,Infectious spleen and kidney necrosis virus	-	KC244182,AY532606
Rodent herpesvirus Peru	NC_015049	vertebrates	2	Herpesviridae,,Rodent herpesvirus Peru	-	HQ698924,HQ221963
Rodent pegivirus	NC_021154	vertebrates	1	Flaviviridae,Pegivirus,Rodent pegivirus	-	KC815311
Ross's goose hepatitis B virus	NC_005888,NC_005950	vertebrates	3	Hepadnaviridae,,Ross's goose hepatitis B virus	-	AY494849,AY494848,M95589
Rotavirus D chicken/05V0049/DEU/2005	NC_014511	vertebrates	1	Reoviridae,Rotavirus,Rotavirus D	segment 1	GU733443
Rotavirus D chicken/05V0049/DEU/2005	NC_014512	vertebrates	1	Reoviridae,Rotavirus,Rotavirus D	segment 2	GU733444
Rotavirus D chicken/05V0049/DEU/2005	NC_014513	vertebrates	1	Reoviridae,Rotavirus,Rotavirus D	segment 3	GU733445
Rotavirus D chicken/05V0049/DEU/2005	NC_014514	vertebrates	1	Reoviridae,Rotavirus,Rotavirus D	segment 4	GU733446
Rotavirus D chicken/05V0049/DEU/2005	NC_014515	vertebrates	1	Reoviridae,Rotavirus,Rotavirus D	segment 5	GU733447
Rotavirus D chicken/05V0049/DEU/2005	NC_014516	vertebrates	1	Reoviridae,Rotavirus,Rotavirus D	segment 6	GU733448
Rotavirus D chicken/05V0049/DEU/2005	NC_014517	vertebrates	1	Reoviridae,Rotavirus,Rotavirus D	segment 7	GU733449
Rotavirus D chicken/05V0049/DEU/2005	NC_014518	vertebrates	1	Reoviridae,Rotavirus,Rotavirus D	segment 8	GU733450
Rotavirus D chicken/05V0049/DEU/2005	NC_014519	vertebrates	1	Reoviridae,Rotavirus,Rotavirus D	segment 9	GU733451
Rotavirus D chicken/05V0049/DEU/2005	NC_014520	vertebrates	1	Reoviridae,Rotavirus,Rotavirus D	segment 10	GU733452
Rotavirus D chicken/05V0049/DEU/2005	NC_014521	vertebrates	1	Reoviridae,Rotavirus,Rotavirus D	segment 11	GU733453
Rous sarcoma virus	NC_001407	vertebrates	3	Retroviridae,Alpharetrovirus,Rous sarcoma virus	-	V01197,X68524,AF033808
Rous sarcoma virus - Prague C	NC_001407	vertebrates	1	Retroviridae,Alpharetrovirus,Rous sarcoma virus	-	J02342
Rous sarcoma virus - Schmidt-Ruppin B	NC_001407	vertebrates	1	Retroviridae,Alpharetrovirus,Rous sarcoma virus	-	AF052428
Rous sarcoma virus - Schmidt-Ruppin D	NC_001407	vertebrates	1	Retroviridae,Alpharetrovirus,Rous sarcoma virus	-	D10652
Rousettus aegyptiacus papillomavirus type 1	NC_008298	vertebrates	1	Papillomaviridae,Psipapillomavirus,Psipapillomavirus 1	-	DQ366842
Rousettus bat coronavirus HKU10	NC_018871	vertebrates	2	Coronaviridae,Alphacoronavirus,Bat coronavirus HKU10	-	JQ989271,JQ989270
Rousettus bat coronavirus HKU9	NC_009021	vertebrates	1	Coronaviridae,Betacoronavirus,Rousettus bat coronavirus HKU9	-	EF065513
SIVcpz Ptt-04Cam155	NC_001549,NC_004455	vertebrates	1	Retroviridae,Lentivirus,Simian immunodeficiency virus	-	FR686510
SIVcpz Ptt-09Cam155	NC_001549,NC_004455	vertebrates	1	Retroviridae,Lentivirus,Simian immunodeficiency virus	-	FR686511
STL polyomavirus	NC_020106	vertebrates	3	Polyomaviridae,Polyomavirus,STL polyomavirus	-	KF525270,JX463184,JX463183
Sable antelope coronavirus US/OH1/2003	NC_010327,NC_007732,NC_005147,NC_003045	vertebrates	1	Coronaviridae,Betacoronavirus,Betacoronavirus 1	-	EF424621
Saffold virus	NC_009448,NC_001366,NC_010810	vertebrates	11	Picornaviridae,Cardiovirus,Theilovirus	-	HM181998,FM207487,JF813004,HM181997,HM181996,HQ902242,HM181999,HQ162476,EF165067,GU943513,FN999911
Saimiriine herpesvirus 1	NC_014567	vertebrates	1	Herpesviridae,Simplexvirus,Saimiriine herpesvirus 1	-	HM625781
Saimiriine herpesvirus 2	NC_001350	vertebrates	2	Herpesviridae,Rhadinovirus,Saimiriine herpesvirus 2	-	AJ410493,X64346
Saimiriine herpesvirus 3	NC_016448	vertebrates	1	Herpesviridae,Cytomegalovirus,Saimiriine herpesvirus 3	-	FJ483967
Salivirus	NC_012957,NC_012986	vertebrates	1	Picornaviridae,Salivirus,Salivirus A	-	JN379039
Salivirus A	NC_012957,NC_012986	vertebrates	1	Picornaviridae,Salivirus,Salivirus A	-	GU245894
Salivirus NG-J1	NC_012957,NC_012986	vertebrates	1	Picornaviridae,Salivirus,Salivirus A	-	GQ179640
Sambar deer coronavirus US/OH-WD388-TC/1994	NC_010327,NC_007732,NC_005147,NC_003045	vertebrates	2	Coronaviridae,Betacoronavirus,Betacoronavirus 1	-	FJ425188,FJ425190
Sambar deer coronavirus US/OH-WD388/1994	NC_010327,NC_007732,NC_005147,NC_003045	vertebrates	1	Coronaviridae,Betacoronavirus,Betacoronavirus 1	-	FJ425189
San Miguel sea lion virus	NC_002551	vertebrates	1	Caliciviridae,Vesivirus,Vesicular exanthema of swine virus	-	U15301
Scotophilus bat coronavirus 512	NC_009657	vertebrates	1	Coronaviridae,Alphacoronavirus,Scotophilus bat coronavirus 512	-	DQ648858
Sea turtle tornovirus 1	NC_012094	vertebrates	9	Sea turtle tornovirus 1	-	EU867817,EU867823,EU867821,EU867822,EU867816,EU867820,EU867818,EU867824,EU867819
Seal picornavirus type 1	NC_009891	vertebrates	1	Picornaviridae,Aquamavirus,Aquamavirus A	-	EU142040
Sebokele virus 1	NC_021482	vertebrates	1	Picornaviridae,Parechovirus,Sebokele virus 1	-	HF677705
Seneca valley virus	NC_011349	vertebrates	2	Picornaviridae,Senecavirus,Seneca valley virus	-	DQ641257,KC667560
Sevenband grouper nervous necrosis virus	NC_008040	vertebrates	1	Nodaviridae,Betanodavirus,Redspotted grouper nervous necrosis virus	segment RNA 1	AB373028
Sevenband grouper nervous necrosis virus	NC_008041	vertebrates	1	Nodaviridae,Betanodavirus,Redspotted grouper nervous necrosis virus	segment RNA 2	AB373029
Sheeppox virus	NC_004002	vertebrates	1	Poxviridae,Capripoxvirus,Sheeppox virus	-	AY077832
Sheeppox virus A	NC_004002	vertebrates	1	Poxviridae,Capripoxvirus,Sheeppox virus	-	AY077833
Sheeppox virus NISKHI	NC_004002	vertebrates	1	Poxviridae,Capripoxvirus,Sheeppox virus	-	AY077834
Sheldgoose hepatitis B virus	NC_005890	vertebrates	2	Hepadnaviridae,,Sheldgoose hepatitis B virus	-	AY494853,AY494852
Simian T-cell lymphotropic virus 6	NC_011546	vertebrates	1	Retroviridae,Deltaretrovirus,Simian T-cell lymphotropic virus 6	-	EU231644
Simian T-lymphotropic virus 1	NC_000858,NC_001436	vertebrates	4	Retroviridae,Deltaretrovirus,Primate T-lymphotropic virus 1	-	Z46900,AF074966,JX987040,AY590142
Simian T-lymphotropic virus 2	NC_001815,NC_001488	vertebrates	2	Retroviridae,Deltaretrovirus,Primate T-lymphotropic virus 2	-	Y14570,U90557
Simian T-lymphotropic virus 3	NC_003323	vertebrates	5	Retroviridae,Deltaretrovirus,Primate T-lymphotropic virus 3	-	AY217650,Y07616,AF391797,AF517775,AY222339
Simian adenovirus 1	NC_006879	vertebrates	1	Adenoviridae,Mastadenovirus,Human adenovirus G	-	AY771780
Simian adenovirus 18	NC_022266	vertebrates	1	Adenoviridae,Mastadenovirus,Simian adenovirus 18	-	FJ025931
Simian adenovirus 20	NC_020485	vertebrates	1	Adenoviridae,Mastadenovirus,Simian adenovirus 20	-	HQ605912
Simian adenovirus 22	NC_003266,NC_017825	vertebrates	1	Adenoviridae,Mastadenovirus,Human adenovirus E	-	AY530876
Simian adenovirus 23	NC_003266,NC_017825	vertebrates	1	Adenoviridae,Mastadenovirus,Human adenovirus E	-	AY530877
Simian adenovirus 24	NC_003266,NC_017825	vertebrates	1	Adenoviridae,Mastadenovirus,Human adenovirus E	-	AY530878
Simian adenovirus 25	NC_003266,NC_017825	vertebrates	1	Adenoviridae,Mastadenovirus,Human adenovirus E	-	AF394196
Simian adenovirus 25.2	NC_003266,NC_017825	vertebrates	1	Adenoviridae,Mastadenovirus,Human adenovirus E	-	FJ025918
Simian adenovirus 26	NC_003266,NC_017825	vertebrates	1	Adenoviridae,Mastadenovirus,Human adenovirus E	-	FJ025923
Simian adenovirus 3	NC_006144	vertebrates	1	Adenoviridae,Mastadenovirus,Simian adenovirus A	-	AY598782
Simian adenovirus 30	NC_003266,NC_017825	vertebrates	1	Adenoviridae,Mastadenovirus,Human adenovirus E	-	FJ025920
Simian adenovirus 36	NC_003266,NC_017825	vertebrates	1	Adenoviridae,Mastadenovirus,Human adenovirus E	-	FJ025917
Simian adenovirus 37.1	NC_003266,NC_017825	vertebrates	1	Adenoviridae,Mastadenovirus,Human adenovirus E	-	FJ025921
Simian adenovirus 37.2	NC_003266,NC_017825	vertebrates	1	Adenoviridae,Mastadenovirus,Human adenovirus E	-	FJ025919
Simian adenovirus 38	NC_003266,NC_017825	vertebrates	1	Adenoviridae,Mastadenovirus,Human adenovirus E	-	FJ025922
Simian adenovirus 39	NC_003266,NC_017825	vertebrates	1	Adenoviridae,Mastadenovirus,Human adenovirus E	-	FJ025924
Simian adenovirus 49	NC_015225	vertebrates	1	Adenoviridae,Mastadenovirus,Simian adenovirus B	-	HQ241819
Simian adenovirus 50	NC_015225	vertebrates	1	Adenoviridae,Mastadenovirus,Simian adenovirus B	-	HQ241820
Simian adenovirus 6	NC_006144	vertebrates	1	Adenoviridae,Mastadenovirus,Simian adenovirus A	-	JQ776547
Simian adenovirus A1139	NC_015225	vertebrates	1	Adenoviridae,Mastadenovirus,Simian adenovirus B	-	JN880448
Simian adenovirus A1163	NC_015225	vertebrates	1	Adenoviridae,Mastadenovirus,Simian adenovirus B	-	JN880449
Simian adenovirus A1173	NC_015225	vertebrates	1	Adenoviridae,Mastadenovirus,Simian adenovirus B	-	JN880450
Simian adenovirus A1258	NC_015225	vertebrates	1	Adenoviridae,Mastadenovirus,Simian adenovirus B	-	JN880451
Simian adenovirus A1285	NC_015225	vertebrates	1	Adenoviridae,Mastadenovirus,Simian adenovirus B	-	JN880452
Simian adenovirus A1296	NC_015225	vertebrates	1	Adenoviridae,Mastadenovirus,Simian adenovirus B	-	JN880453
Simian adenovirus A1312	NC_015225	vertebrates	1	Adenoviridae,Mastadenovirus,Simian adenovirus B	-	JN880454
Simian adenovirus A1327	NC_015225	vertebrates	1	Adenoviridae,Mastadenovirus,Simian adenovirus B	-	JN880455
Simian adenovirus A1335	NC_015225	vertebrates	1	Adenoviridae,Mastadenovirus,Simian adenovirus B	-	JN880456
Simian adenovirus B	NC_015225	vertebrates	1	Adenoviridae,Mastadenovirus,Simian adenovirus B	-	KC693021
Simian adenovirus C	NC_021168	vertebrates	3	Adenoviridae,Mastadenovirus,Simian adenovirus C	-	KC693024,KC693023,KC693022
Simian endogenous retrovirus vero ATCC CCL-81	NC_001550	vertebrates	1	Retroviridae,Betaretrovirus,Mason-Pfizer monkey virus	-	JN134185
Simian enterovirus A	NC_003988	vertebrates	1	Picornaviridae,Enterovirus,Enterovirus H	-	AF201894
Simian enterovirus SV4	NC_003988	vertebrates	1	Picornaviridae,Enterovirus,Enterovirus H	-	AF326759
Simian foamy virus	NC_001364	vertebrates	5	Retroviridae,Spumavirus,Simian foamy virus	-	JQ867465,JQ867462,JQ867464,U04327,JQ867463
Simian foamy virus-gorilla	NC_001364	vertebrates	1	Retroviridae,Spumavirus,Simian foamy virus	-	HM245790
Simian foamy virus-orangutan	NC_001364	vertebrates	1	Retroviridae,Spumavirus,Simian foamy virus	-	AJ544579
Simian hemorrhagic fever virus	NC_003092	vertebrates	1	Arteriviridae,Arterivirus,Simian hemorrhagic fever virus	-	AF180391
Simian hepatitis A virus	NC_001489	vertebrates	2	Picornaviridae,Hepatovirus,Hepatitis A virus	-	EU140838,D00924
Simian immunodeficiency virus	NC_001549,NC_004455	vertebrates	109	Retroviridae,Lentivirus,Simian immunodeficiency virus	-	JN091690,AY597209,AB253736,AY340700,AF328295,DQ373063,EU280804,AF075269,EF070331,EF535993,EF394357,M31325,U79412,AY611486,M27470,AY169968,EF070330,AY603959,AY576480,M19499,EU280805,AY599198,DQ201174,JN835461,AY611488,AY607702,AJ271369,AY599201,AY159322,AY523866,AY576481,DQ374658,AY588945,DQ201173,AY611494,AB177846,AF103818,AM713177,EF070329,X52154,AY588946,M32741,FJ424863,DQ374657,M30931,EF394358…
Simian immunodeficiency virus - agm.sab-1	NC_001549,NC_004455	vertebrates	1	Retroviridae,Lentivirus,Simian immunodeficiency virus	-	U04005
Simian immunodeficiency virus - agm.tan-1	NC_001549,NC_004455	vertebrates	1	Retroviridae,Lentivirus,Simian immunodeficiency virus	-	U58991
Simian immunodeficiency virus 17E-Cl	NC_001549,NC_004455	vertebrates	1	Retroviridae,Lentivirus,Simian immunodeficiency virus	-	AY033233
Simian immunodeficiency virus 17E-Fr	NC_001549,NC_004455	vertebrates	1	Retroviridae,Lentivirus,Simian immunodeficiency virus	-	AY033146
Simian retrovirus 1	NC_001550	vertebrates	2	Retroviridae,Betaretrovirus,Mason-Pfizer monkey virus	-	M11841,U85505
Simian retrovirus 2	NC_001550	vertebrates	3	Retroviridae,Betaretrovirus,Mason-Pfizer monkey virus	-	M16605,AF126467,AF126468
Simian retrovirus 4	NC_014474	vertebrates	3	Retroviridae,Betaretrovirus,Simian retrovirus 4	-	FJ979639,FJ971077,FJ979638
Simian sapelovirus 1	NC_004451	vertebrates	1	Picornaviridae,Sapelovirus,Simian sapelovirus	-	AY064708
Simian virus 12	NC_007611	vertebrates	2	Polyomaviridae,Polyomavirus,Simian virus 12	-	DQ435829,AY614708
Singapore grouper iridovirus	NC_006549	vertebrates	1	Iridoviridae,Ranavirus,Singapore grouper iridovirus	-	AY521625
Siniperca chuatsi rhabdovirus	NC_008514	vertebrates	1	Rhabdoviridae,,Siniperca chuatsi rhabdovirus	-	DQ399789
Small ruminant lentivirus	NC_001463	vertebrates	1	Retroviridae,Lentivirus,Caprine arthritis encephalitis virus	-	HM210570
Snake adenovirus 1	NC_009989	vertebrates	1	Adenoviridae,Atadenovirus,Snake adenovirus A	-	DQ106414
Snake parvovirus 1	NC_006148	vertebrates	1	Parvoviridae,Dependovirus,Snake parvovirus 1	-	AY349010
Snakehead retrovirus	NC_001724	vertebrates	1	Retroviridae,,Snakehead retrovirus	-	U26458
Snakehead rhabdovirus	NC_000903	vertebrates	1	Rhabdoviridae,Novirhabdovirus,Snakehead virus	-	AF147498
Snow goose hepatitis B virus	NC_005888,NC_005950	vertebrates	4	Hepadnaviridae,,Ross's goose hepatitis B virus	-	AF110999,AF111000,AF110997,AF110998
Soft-shelled turtle iridovirus	NC_005946	vertebrates	1	Iridoviridae,Ranavirus,Frog virus 3	-	EU627010
South polar skua adenovirus-1	NC_016437	vertebrates	1	Adenoviridae,Siadenovirus,Skua adenovirus A	-	HM585353
Sparrow coronavirus HKU17	NC_016992	vertebrates	1	Coronaviridae,Deltacoronavirus,Sparrow coronavirus HKU17	-	JQ065045
Spider monkey foamy virus	NC_001364	vertebrates	1	Retroviridae,Spumavirus,Simian foamy virus	-	EU010385
Spissistilus festinus reovirus	NC_016874	vertebrates	1	Reoviridae,,Spissistilus festinus reovirus	segment 2	JF773383
Spissistilus festinus reovirus	NC_016875	vertebrates	1	Reoviridae,,Spissistilus festinus reovirus	segment 4	JF773385
Spissistilus festinus reovirus	NC_016876	vertebrates	1	Reoviridae,,Spissistilus festinus reovirus	segment 6	JF773387
Spissistilus festinus reovirus	NC_016877	vertebrates	1	Reoviridae,,Spissistilus festinus reovirus	segment 8	JF773389
Spissistilus festinus reovirus	NC_016878	vertebrates	1	Reoviridae,,Spissistilus festinus reovirus	segment 10	JF773391
Spissistilus festinus reovirus	NC_016879	vertebrates	1	Reoviridae,,Spissistilus festinus reovirus	segment 1	JF773382
Spissistilus festinus reovirus	NC_016880	vertebrates	1	Reoviridae,,Spissistilus festinus reovirus	segment 3	JF773384
Spissistilus festinus reovirus	NC_016881	vertebrates	1	Reoviridae,,Spissistilus festinus reovirus	segment 5	JF773386
Spissistilus festinus reovirus	NC_016882	vertebrates	1	Reoviridae,,Spissistilus festinus reovirus	segment 7	JF773388
Spissistilus festinus reovirus	NC_016883	vertebrates	1	Reoviridae,,Spissistilus festinus reovirus	segment 9	JF773390
Spleen focus-forming virus	NC_001500	vertebrates	1	Retroviridae,Gammaretrovirus,Spleen focus-forming virus	-	K00021
Spring viraemia of carp virus	NC_002803	vertebrates	4	Rhabdoviridae,Vesiculovirus,Spring viraemia of carp virus	-	U18101,AJ318079,EU177782,DQ491000
Spring viremia of carp virus	NC_002803	vertebrates	1	Rhabdoviridae,Vesiculovirus,Spring viraemia of carp virus	-	DQ097384
Squirrel monkey foamy virus	NC_001364	vertebrates	1	Retroviridae,Spumavirus,Simian foamy virus	-	GU356394
Squirrel monkey polyomavirus	NC_009951	vertebrates	1	Polyomaviridae,Polyomavirus,Squirrel monkey polyomavirus	-	AM748741
Squirrel monkey retrovirus	NC_001514	vertebrates	1	Retroviridae,Betaretrovirus,Squirrel monkey retrovirus	-	M23385
Squirrelpox virus	NC_022563	vertebrates	1	Poxviridae,,Squirrelpox virus	-	HE601899
St-Valerien swine virus	NC_012699	vertebrates	1	Caliciviridae,,St-Valerien swine virus	-	AB863586
Starling circovirus	NC_008033	vertebrates	1	Circoviridae,Circovirus,Starling circovirus	-	DQ172906
Steller sea lion vesivirus	NC_011050	vertebrates	2	Caliciviridae,Vesivirus,Steller sea lion vesivirus	-	EF193004,EF195384
Stork hepatitis B virus	NC_001486	vertebrates	4	Hepadnaviridae,Avihepadnavirus,Heron hepatitis B virus	-	AJ251937,AJ251935,AJ251936,AJ251934
Striped Jack nervous necrosis virus	NC_003448	vertebrates	2	Nodaviridae,Betanodavirus,Striped Jack nervous necrosis virus	segment RNA 1	AB025018,AB056571
Striped Jack nervous necrosis virus	NC_003449	vertebrates	2	Nodaviridae,Betanodavirus,Striped Jack nervous necrosis virus	segment RNA 2	AB056572,D30814
Striped bass reovirus	NC_007588	vertebrates	1	Reoviridae,Aquareovirus,Aquareovirus A	segment 8	AF450321
Striped bass reovirus	NC_007590	vertebrates	2	Reoviridae,Aquareovirus,Aquareovirus A	segment 10	U83396,AF450322
Suid herpesvirus 1	NC_006151	vertebrates	6	Herpesviridae,Varicellovirus,Suid herpesvirus 1	-	JF797217,BK001744,JQ809330,JQ809329,JF797219,JF797218
Sus scrofa papillomavirus type 1	NC_011280	vertebrates	2	Papillomaviridae,Dyodeltapapillomavirus,Dyodeltapapillomavirus 1	-	EF395819,EF395818
Swine pasivirus 1	NC_018226	vertebrates	1	Picornaviridae,,Swine pasivirus 1	-	JQ316470
Swinepox virus	NC_003389	vertebrates	1	Poxviridae,Suipoxvirus,Swinepox virus	-	AF410153
TGEV Miller M6	NC_002306	vertebrates	1	Coronaviridae,Alphacoronavirus,Alphacoronavirus 1	-	DQ811785
TGEV Miller M60	NC_002306	vertebrates	1	Coronaviridae,Alphacoronavirus,Alphacoronavirus 1	-	DQ811786
TGEV Purdue P115	NC_002306	vertebrates	1	Coronaviridae,Alphacoronavirus,Alphacoronavirus 1	-	DQ811788
TGEV virulent Purdue	NC_002306	vertebrates	1	Coronaviridae,Alphacoronavirus,Alphacoronavirus 1	-	DQ811789
Tanapox virus	NC_002642,NC_009888	vertebrates	1	Poxviridae,Yatapoxvirus,Tanapox virus	-	EF420157
Taterapox virus	NC_008291	vertebrates	1	Poxviridae,Orthopoxvirus,Taterapox virus	-	DQ437594
Theiler's encephalomyelitis virus	NC_009448,NC_001366,NC_010810	vertebrates	9	Picornaviridae,Cardiovirus,Theilovirus	-	M16020,EU723238,EU718732,HQ652539,EU718733,M20301,DQ401688,M20562,JX443418
Theiler's-like virus of rats	NC_009448,NC_001366,NC_010810	vertebrates	1	Picornaviridae,Cardiovirus,Theilovirus	-	AB090161
Threadfin reovirus	NC_007590	vertebrates	1	Reoviridae,Aquareovirus,Aquareovirus A	segment 10	AY236219
Threadfin reovirus	NC_007591	vertebrates	1	Reoviridae,Aquareovirus,Aquareovirus A	segment 11	AF524892
Threadfin reovirus	NC_007592	vertebrates	1	Reoviridae,Aquareovirus,Aquareovirus A	segment 6	AY235428
Thrush coronavirus HKU12-600	NC_011549	vertebrates	1	Coronaviridae,Deltacoronavirus,Thrush coronavirus HKU12	-	FJ376621
Tiger frog virus	NC_005946	vertebrates	1	Iridoviridae,Ranavirus,Frog virus 3	-	AF389451
Tiger puffer nervous necrosis virus	NC_013460	vertebrates	1	Nodaviridae,Betanodavirus,Tiger puffer nervous necrosis virus	segment RNA 1	EU236148
Tiger puffer nervous necrosis virus	NC_013461	vertebrates	1	Nodaviridae,Betanodavirus,Tiger puffer nervous necrosis virus	segment RNA 2	EU236149
Titi monkey adenovirus ECC-2011	NC_020487	vertebrates	1	Adenoviridae,,Titi monkey adenovirus ECC-2011	-	HQ913600
Transmissible gastroenteritis virus	NC_002306	vertebrates	10	Coronaviridae,Alphacoronavirus,Alphacoronavirus 1	-	HQ462571,DQ201447,AJ271965,AX154950,KC962433,EU074218,CQ870486,DQ443743,HM776941,FJ755618
Trichechus manatus latirostris papillomavirus 1	NC_006563	vertebrates	1	Papillomaviridae,Rhopapillomavirus,Rhopapillomavirus 1	-	AY609301
Trichechus manatus latirostris papillomavirus 2	NC_016898	vertebrates	1	Papillomaviridae,,Trichechus manatus latirostris papillomavirus 2	-	JN709473
Trichodysplasia spinulosa-associated polyomavirus	NC_014361	vertebrates	3	Polyomaviridae,Polyomavirus,Trichodysplasia spinulosa-associated polyomavirus	-	GU989205,AB873001,JQ723730
Tupaia virus	NC_007020	vertebrates	1	Rhabdoviridae,,Tupaia virus	-	AY840978
Tupaiid herpesvirus 1	NC_002794	vertebrates	1	Herpesviridae,,Tupaiid herpesvirus 1	-	AF281817
Turdivirus 1	NC_014411	vertebrates	2	Picornaviridae,Orthoturdivirus,Turdivirus 1	-	GU182406,GU182407
Turdivirus 2	NC_014412	vertebrates	2	Picornaviridae,Paraturdivirus,Turdivirus 2	-	GU182409,GU182408
Turdivirus 3	NC_014413	vertebrates	2	Picornaviridae,Paraturdivirus,Turdivirus 3	-	GU182411,GU182410
Turkey adenovirus 1	NC_014564	vertebrates	1	Adenoviridae,Aviadenovirus,Turkey adenovirus B	-	GU936707
Turkey adenovirus 4	NC_022612	vertebrates	1	Adenoviridae,Aviadenovirus,Turkey adenovirus 4	-	KF477312
Turkey adenovirus 5	NC_022613	vertebrates	1	Adenoviridae,Aviadenovirus,Turkey adenovirus 5	-	KF477313
Turkey adenovirus A	NC_001958	vertebrates	1	Adenoviridae,Siadenovirus,Turkey adenovirus A	-	AF074946
Turkey astrovirus	NC_002470	vertebrates	8	Astroviridae,Avastrovirus,Turkey astrovirus	-	EU143850,EU143845,EU143848,EU143849,EU143846,EU143847,EU143844,Y15936
Turkey astrovirus 2	NC_005790	vertebrates	2	Astroviridae,Avastrovirus,Avastrovirus 3	-	EU143843,AF206663
Turkey coronavirus	NC_010800,NC_001451	vertebrates	7	Coronaviridae,Gammacoronavirus,Avian coronavirus	-	GQ427175,EU022526,GQ427174,GQ427173,GQ427176,EU022525,EU095850
Turkey gallivirus	NC_018400	vertebrates	1	Picornaviridae,,Turkey gallivirus	-	JQ691613
Turkey hepatitis virus 2993D	NC_021201	vertebrates	1	Picornaviridae,Megrivirus,Melegrivirus A	-	HM751199
Tursiops truncatus papillomavirus 1	NC_011109	vertebrates	1	Papillomaviridae,Upsilonpapillomavirus,Upsilonpapillomavirus 1	-	EU240894
Tursiops truncatus papillomavirus 2	NC_008184	vertebrates	1	Papillomaviridae,Upsilonpapillomavirus,Upsilonpapillomavirus 2	-	AY956402
Tursiops truncatus papillomavirus type 3	NC_011109	vertebrates	1	Papillomaviridae,Upsilonpapillomavirus,Upsilonpapillomavirus 1	-	EU240895
Tylonycteris bat coronavirus HKU4	NC_009019	vertebrates	1	Coronaviridae,Betacoronavirus,Tylonycteris bat coronavirus HKU4	-	EF065505
UR2 sarcoma virus	NC_001618	vertebrates	1	Retroviridae,Alpharetrovirus,UR2 sarcoma virus	-	M10455
Uncia uncia papillomavirus type 1	NC_004765	vertebrates	1	Papillomaviridae,Lambdapapillomavirus,Lambdapapillomavirus 1	-	DQ180494
Ursus maritimus papillomavirus 1	NC_010739	vertebrates	1	Papillomaviridae,Omegapapillomavirus,Omegapapillomavirus 1	-	EF536349
VESV-like calicivirus	NC_002551	vertebrates	1	Caliciviridae,Vesivirus,Vesicular exanthema of swine virus	-	AF091736
Vervet monkey polyomavirus 1	NC_019844	vertebrates	1	Polyomaviridae,Polyomavirus,Vervet monkey polyomavirus 1	-	AB767298
Vesicular exanthema of swine virus	NC_002551	vertebrates	1	Caliciviridae,Vesivirus,Vesicular exanthema of swine virus	-	U76874
Viral hemorrhagic septicemia virus	NC_000855	vertebrates	16	Rhabdoviridae,Novirhabdovirus,Viral hemorrhagic septicemia virus	-	AB672614,EU481506,FJ460590,AF143862,AF143863,FJ362510,GQ385941,FN665788,JF792424,Z93412,KF477302,FJ460591,Z93414,AB179621,AB490792,KC778774
Viral hemorrhagic septicemia virus (STRAIN 07-71)	NC_000855	vertebrates	1	Rhabdoviridae,Novirhabdovirus,Viral hemorrhagic septicemia virus	-	AJ233396
Viral hemorrhagic septicemia virus Fil3	NC_000855	vertebrates	1	Rhabdoviridae,Novirhabdovirus,Viral hemorrhagic septicemia virus	-	Y18263
Visna/Maedi virus	NC_001452	vertebrates	7	Retroviridae,Lentivirus,Visna/maedi virus	-	M10608,M60610,M60609,L06906,M51543,S55323,A15114
Visna/maedi virus	NC_001452	vertebrates	1	Retroviridae,Lentivirus,Visna/maedi virus	-	HQ848062
Walleye dermal sarcoma virus	NC_001867	vertebrates	3	Retroviridae,Epsilonretrovirus,Walleye dermal sarcoma virus	-	AF033822,L41838,EF428979
Walrus calicivirus	NC_004541	vertebrates	1	Caliciviridae,,Walrus calicivirus	-	AF321298
Waterbuck coronavirus US/OH-WD358-GnC/1994	NC_010327,NC_007732,NC_005147,NC_003045	vertebrates	1	Coronaviridae,Betacoronavirus,Betacoronavirus 1	-	FJ425185
Waterbuck coronavirus US/OH-WD358-TC/1994	NC_010327,NC_007732,NC_005147,NC_003045	vertebrates	1	Coronaviridae,Betacoronavirus,Betacoronavirus 1	-	FJ425184
Waterbuck coronavirus US/OH-WD358/1994	NC_010327,NC_007732,NC_005147,NC_003045	vertebrates	1	Coronaviridae,Betacoronavirus,Betacoronavirus 1	-	FJ425186
White bream virus	NC_008516	vertebrates	1	Coronaviridae,Bafinivirus,White bream virus	-	DQ898157
White-eye coronavirus HKU16	NC_016991	vertebrates	1	Coronaviridae,Deltacoronavirus,White-eye coronavirus HKU16	-	JQ065044
White-tailed deer coronavirus US/OH-WD470/1994	NC_010327,NC_007732,NC_005147,NC_003045	vertebrates	1	Coronaviridae,Betacoronavirus,Betacoronavirus 1	-	FJ425187
Wigeon coronavirus HKU20	NC_016995	vertebrates	1	Coronaviridae,Deltacoronavirus,Wigeon coronavirus HKU20	-	JQ065048
Wood mouse herpesvirus	NC_001826	vertebrates	1	Herpesviridae,Rhadinovirus,Murid herpesvirus 4	-	GQ169129
Woodchuck hepatitis virus	NC_004107	vertebrates	19	Hepadnaviridae,Orthohepadnavirus,Woodchuck hepatitis virus	-	KF874491,M11082,M19183,M18752,GU734791,J04514,AY334077,KF874493,AY334075,AY334076,AY628100,J02442,AY628097,AY628099,AY628098,KF874492,AY628095,AY628096,M90520
Woolly monkey sarcoma virus	NC_009424	vertebrates	1	Retroviridae,Gammaretrovirus,Woolly monkey sarcoma virus	-	V01201
XMRV	NC_007815	vertebrates	1	Retroviridae,Gammaretrovirus,Murine leukemia-related retroviruses	-	FR872816
XMRV-like mouse endogenous retrovirus mERV-XL	NC_007815	vertebrates	1	Retroviridae,Gammaretrovirus,Murine leukemia-related retroviruses	-	JF714652
Xenopus laevis endogenous retrovirus Xen1	NC_010955	vertebrates	1	Retroviridae,,Xenopus laevis endogenous retrovirus Xen1	-	AJ506107
Xenotropic MuLV-related virus	NC_007815	vertebrates	4	Retroviridae,Gammaretrovirus,Murine leukemia-related retroviruses	-	HQ154630,GQ497343,GQ497344,FN692043
Xenotropic MuLV-related virus VP35	NC_007815	vertebrates	1	Retroviridae,Gammaretrovirus,Murine leukemia-related retroviruses	-	DQ241301
Xenotropic MuLV-related virus VP42	NC_007815	vertebrates	1	Retroviridae,Gammaretrovirus,Murine leukemia-related retroviruses	-	DQ241302
Xenotropic MuLV-related virus VP62	NC_007815	vertebrates	2	Retroviridae,Gammaretrovirus,Murine leukemia-related retroviruses	-	EF185282,DQ399707
Xenotropic murine leukemia virus	NC_001702,NC_001819,NC_001362,NC_001501	vertebrates	2	Retroviridae,Gammaretrovirus,Murine leukemia virus	-	JF908816,JF908815
Y73 sarcoma virus	NC_008094	vertebrates	2	Retroviridae,Alpharetrovirus,Y73 sarcoma virus	-	V01170,L21974
Yaba monkey tumor virus	NC_005179	vertebrates	1	Poxviridae,Yatapoxvirus,Yaba monkey tumor virus	-	AY386371
Yaba-like disease virus	NC_002642,NC_009888	vertebrates	1	Poxviridae,Yatapoxvirus,Tanapox virus	-	AJ293568
Yellowtail ascites virus	NC_004168	vertebrates	3	Birnaviridae,Aquabirnavirus,Yellowtail ascites virus	segment RNA A	AB281673,AB011440,AB006783
Yellowtail ascites virus	NC_004176	vertebrates	2	Birnaviridae,Aquabirnavirus,Yellowtail ascites virus	segment RNA B	AY129662,AB281674
Yellowtail ascites virus - YT-01A	NC_004176	vertebrates	1	Birnaviridae,Aquabirnavirus,Yellowtail ascites virus	segment RNA B	AY129663
Yoka poxvirus	NC_015960	vertebrates	1	Poxviridae,Orthopoxvirus,Yoka poxvirus	-	HQ849551
Zalophus californianus papillomavirus 1	NC_015325	vertebrates	1	Papillomaviridae,,Zalophus californianus papillomavirus 1	-	HQ293213
Zetapapillomavirus 1	NC_003748	vertebrates	1	Papillomaviridae,Zetapapillomavirus,Zetapapillomavirus 1	-	AF394740
Adeno-associated virus - 2	NC_001401	vertebrates,human	2	Parvoviridae,Dependovirus,Adeno-associated virus - 2	-	AF043303,J01901
Adeno-associated virus - 3	NC_001729	vertebrates,human	1	Parvoviridae,Dependovirus,Adeno-associated virus - 3	-	U48704
Adeno-associated virus - 5	NC_006152	vertebrates,human	2	Parvoviridae,Dependovirus,Adeno-associated virus - 5	-	AF085716,Y18065
Adeno-associated virus 3B	NC_001729	vertebrates,human	1	Parvoviridae,Dependovirus,Adeno-associated virus - 3	-	AF028705
Adeno-associated virus-Go.1	NC_006152	vertebrates,human	1	Parvoviridae,Dependovirus,Adeno-associated virus - 5	-	DQ335246
Adult diarrheal rotavirus strain J19	NC_007548	vertebrates,human	1	Reoviridae,Rotavirus,Rotavirus H	segment 1	DQ113897
Adult diarrheal rotavirus strain J19	NC_007549	vertebrates,human	1	Reoviridae,Rotavirus,Rotavirus H	segment 2	DQ113898
Adult diarrheal rotavirus strain J19	NC_007550	vertebrates,human	1	Reoviridae,Rotavirus,Rotavirus H	segment 4	DQ113899
Adult diarrheal rotavirus strain J19	NC_007551	vertebrates,human	1	Reoviridae,Rotavirus,Rotavirus H	segment 3	DQ113900
Adult diarrheal rotavirus strain J19	NC_007552	vertebrates,human	1	Reoviridae,Rotavirus,Rotavirus H	segment 5	DQ113901
Adult diarrheal rotavirus strain J19	NC_007553	vertebrates,human	1	Reoviridae,Rotavirus,Rotavirus H	segment 6	DQ113902
Adult diarrheal rotavirus strain J19	NC_007554	vertebrates,human	1	Reoviridae,Rotavirus,Rotavirus H	segment 8	DQ113903
Adult diarrheal rotavirus strain J19	NC_007555	vertebrates,human	1	Reoviridae,Rotavirus,Rotavirus H	segment 7	DQ113904
Adult diarrheal rotavirus strain J19	NC_007556	vertebrates,human	1	Reoviridae,Rotavirus,Rotavirus H	segment 9	DQ113905
Adult diarrheal rotavirus strain J19	NC_007557	vertebrates,human	1	Reoviridae,Rotavirus,Rotavirus H	segment 10	DQ113906
Adult diarrheal rotavirus strain J19	NC_007558	vertebrates,human	1	Reoviridae,Rotavirus,Rotavirus H	segment 11	DQ113907
Allpahuayo virus	NC_010249	vertebrates,human	1	Arenaviridae,Arenavirus,Allpahuayo virus	segment L	AY216502
Allpahuayo virus	NC_010253	vertebrates,human	3	Arenaviridae,Arenavirus,Allpahuayo virus	segment S	AY012686,AY081210,AY012687
Alpaca respiratory coronavirus	NC_002645	vertebrates,human	1	Coronaviridae,Alphacoronavirus,Human coronavirus 229E	-	JQ410000
Amapari virus	NC_010247	vertebrates,human	2	Arenaviridae,Arenavirus,Amapari virus	segment S	AF485256,AF512834
Amapari virus	NC_010251	vertebrates,human	2	Arenaviridae,Arenavirus,Amapari virus	segment L	AY924389,AY216517
Andes virus	NC_003466	vertebrates,human	5	Bunyaviridae,Hantavirus,Andes virus	segment S	AF291702,AF004660,AF324902,AY228237,AF325966
Andes virus	NC_003467	vertebrates,human	3	Bunyaviridae,Hantavirus,Andes virus	segment M	AF291703,AF324901,AY228238
Andes virus	NC_003468	vertebrates,human	2	Bunyaviridae,Hantavirus,Andes virus	segment L	AY228239,AF291704
Araraquara-like virus strain P5/Cajuru	NC_003466	vertebrates,human	1	Bunyaviridae,Hantavirus,Andes virus	segment S	EF571895
Aravan virus	NC_020808	vertebrates,human	1	Rhabdoviridae,Lyssavirus,Aravan virus	-	EF614259
Arenavirus AV 96010025	NC_010700	vertebrates,human	1	Arenaviridae,Arenavirus,Whitewater Arroyo virus	segment S	EU486820
Arenavirus H0380005	NC_010700	vertebrates,human	1	Arenaviridae,Arenavirus,Whitewater Arroyo virus	segment S	EU910959
Australian bat lyssavirus	NC_003243	vertebrates,human	2	Rhabdoviridae,Lyssavirus,Australian bat lyssavirus	-	AF418014,AF081020
Avian hepatitis E virus	NC_023425	vertebrates,human	3	Hepeviridae,,Avian hepatitis E virus	-	AM943646,AY535004,KC454286
Avian metapneumovirus	NC_007652	vertebrates,human	10	Paramyxoviridae,Metapneumovirus,Avian metapneumovirus	-	DQ009484,EF199772,AY640317,JF424833,DQ666911,AB548428,EF199771,AY590688,FJ977568,AY579780
Avian paramyxovirus 4	NC_019531	vertebrates,human	5	Paramyxoviridae,Avulavirus,Avian paramyxovirus 4	-	JX987283,EU877976,FJ177514,JN571485,JX133079
Avian paramyxovirus 6	NC_003043	vertebrates,human	7	Paramyxoviridae,Avulavirus,Avian paramyxovirus 6	-	EU622637,JX522537,KF267717,AY029299,AB759118,EF569970,GQ406232
Avian rotavirus A	NC_011508	vertebrates,human	1	Reoviridae,Rotavirus,Rotavirus A	segment 3	AY277923
Avian rotavirus A	NC_011509	vertebrates,human	1	Reoviridae,Rotavirus,Rotavirus A	segment 6	DQ096805
Avian rotavirus CH2	NC_011509	vertebrates,human	1	Reoviridae,Rotavirus,Rotavirus A	segment 6	EF687020
Avian rotavirus PO-13	NC_011506	vertebrates,human	1	Reoviridae,Rotavirus,Rotavirus A	segment 2	AB009630
Avian rotavirus PO-13	NC_011507	vertebrates,human	1	Reoviridae,Rotavirus,Rotavirus A	segment 1	AB009629
Avian rotavirus PO-13	NC_011508	vertebrates,human	1	Reoviridae,Rotavirus,Rotavirus A	segment 3	AB009631
BK polyomavirus	NC_001538	vertebrates,human	282	Polyomaviridae,Polyomavirus,BK polyomavirus	-	KF055891,AB211388,AB269835,AB269836,AB263928,AB298941,AB464960,AB464963,JN192434,V01108,AB263918,AB269864,AB301093,AB217918,AB464955,AB365166,JN192439,JN192431,AB263925,AB263912,AB369091,AB365164,AY628237,AB263926,FR720317,AB485697,AB464957,AB269868,FR720309,AB263938,AB269823,AB269840,AB269831,V01109,AB365163,FR720314,AB301095,AB369089,AB485696,AB269852,AB269834,FR720312,AB269863,AB263934,FR72032…
Baboon enterovirus	NC_001612	vertebrates,human	1	Picornaviridae,Enterovirus,Enterovirus A	-	AF326750
Bat CoV 273/2005	NC_004718	vertebrates,human	1	Coronaviridae,Betacoronavirus,Severe acute respiratory syndrome-related coronavirus	-	DQ648856
Bat CoV 279/2005	NC_004718	vertebrates,human	1	Coronaviridae,Betacoronavirus,Severe acute respiratory syndrome-related coronavirus	-	DQ648857
Bat Hepatitis B virus	NC_003977	vertebrates,human	1	Hepadnaviridae,Orthohepadnavirus,Hepatitis B virus	-	KC790377
Bat SARS CoV Rf1/2004	NC_004718	vertebrates,human	1	Coronaviridae,Betacoronavirus,Severe acute respiratory syndrome-related coronavirus	-	DQ412042
Bat SARS CoV Rm1/2004	NC_004718	vertebrates,human	1	Coronaviridae,Betacoronavirus,Severe acute respiratory syndrome-related coronavirus	-	DQ412043
Bat SARS CoV Rp3/2004	NC_004718	vertebrates,human	1	Coronaviridae,Betacoronavirus,Severe acute respiratory syndrome-related coronavirus	-	DQ071615
Bat SARS coronavirus HKU3-10	NC_004718	vertebrates,human	1	Coronaviridae,Betacoronavirus,Severe acute respiratory syndrome-related coronavirus	-	GQ153545
Bat SARS coronavirus HKU3-11	NC_004718	vertebrates,human	1	Coronaviridae,Betacoronavirus,Severe acute respiratory syndrome-related coronavirus	-	GQ153546
Bat SARS coronavirus HKU3-12	NC_004718	vertebrates,human	1	Coronaviridae,Betacoronavirus,Severe acute respiratory syndrome-related coronavirus	-	GQ153547
Bat SARS coronavirus HKU3-13	NC_004718	vertebrates,human	1	Coronaviridae,Betacoronavirus,Severe acute respiratory syndrome-related coronavirus	-	GQ153548
Bat SARS coronavirus HKU3-2	NC_004718	vertebrates,human	1	Coronaviridae,Betacoronavirus,Severe acute respiratory syndrome-related coronavirus	-	DQ084199
Bat SARS coronavirus HKU3-3	NC_004718	vertebrates,human	1	Coronaviridae,Betacoronavirus,Severe acute respiratory syndrome-related coronavirus	-	DQ084200
Bat SARS coronavirus HKU3-4	NC_004718	vertebrates,human	1	Coronaviridae,Betacoronavirus,Severe acute respiratory syndrome-related coronavirus	-	GQ153539
Bat SARS coronavirus HKU3-5	NC_004718	vertebrates,human	1	Coronaviridae,Betacoronavirus,Severe acute respiratory syndrome-related coronavirus	-	GQ153540
Bat SARS coronavirus HKU3-6	NC_004718	vertebrates,human	1	Coronaviridae,Betacoronavirus,Severe acute respiratory syndrome-related coronavirus	-	GQ153541
Bat SARS coronavirus HKU3-7	NC_004718	vertebrates,human	1	Coronaviridae,Betacoronavirus,Severe acute respiratory syndrome-related coronavirus	-	GQ153542
Bat SARS coronavirus HKU3-8	NC_004718	vertebrates,human	1	Coronaviridae,Betacoronavirus,Severe acute respiratory syndrome-related coronavirus	-	GQ153543
Bat SARS coronavirus HKU3-9	NC_004718	vertebrates,human	1	Coronaviridae,Betacoronavirus,Severe acute respiratory syndrome-related coronavirus	-	GQ153544
Bat SARS-like coronavirus Rs3367	NC_004718	vertebrates,human	1	Coronaviridae,Betacoronavirus,Severe acute respiratory syndrome-related coronavirus	-	KC881006
Bat SARS-like coronavirus RsSHC014	NC_004718	vertebrates,human	1	Coronaviridae,Betacoronavirus,Severe acute respiratory syndrome-related coronavirus	-	KC881005
Bat SARS-like coronavirus WIV1	NC_004718	vertebrates,human	1	Coronaviridae,Betacoronavirus,Severe acute respiratory syndrome-related coronavirus	-	KF367457
Bat coronavirus HKU3	NC_004718	vertebrates,human	1	Coronaviridae,Betacoronavirus,Severe acute respiratory syndrome-related coronavirus	-	DQ022305
Bat hepevirus	NC_018382	vertebrates,human	1	Hepeviridae,,Bat hepevirus	-	JQ001749
Bat sapovirus TLC58/HK	NC_017936	vertebrates,human	1	Caliciviridae,Sapovirus,Bat sapovirus TLC58/HK	-	JN899075
Bear Canyon virus	NC_010255	vertebrates,human	2	Arenaviridae,Arenavirus,Bear Canyon virus	segment L	AY924390,AY216503
Bear Canyon virus	NC_010256	vertebrates,human	3	Arenaviridae,Arenavirus,Bear Canyon virus	segment S	AF512833,AY924392,AY924391
Beilong virus	NC_007803	vertebrates,human	1	Paramyxoviridae,,Beilong virus	-	DQ100461
Bermejo virus	NC_003466	vertebrates,human	1	Bunyaviridae,Hantavirus,Andes virus	segment S	AF482713
Blue River virus	NC_005215	vertebrates,human	2	Bunyaviridae,Hantavirus,Sin Nombre virus	segment M	AF030551,AF030552
Borna disease virus	NC_001607	vertebrates,human	13	Bornaviridae,Bornavirus,Borna disease virus	-	AJ311522,AB032031,AJ311523,AY114162,AB258389,AB246670,AY114161,L27077,EU781967,U04608,AJ311521,AY114163,AJ311524
Bovine group C rotavirus	NC_007570	vertebrates,human	1	Reoviridae,Rotavirus,Rotavirus C	segment 5	AB108680
Bovine group C rotavirus	NC_007571	vertebrates,human	2	Reoviridae,Rotavirus,Rotavirus C	segment 8	AB108681,U31750
Bovine group C rotavirus	NC_007574	vertebrates,human	1	Reoviridae,Rotavirus,Rotavirus C	segment 4	U26552
Bovine parainfluenza virus 3	NC_002161	vertebrates,human	11	Paramyxoviridae,Respirovirus,Bovine parainfluenza virus 3	-	EU277658,JQ063064,AX073601,AB770484,HQ530153,AF178655,JX969001,D84095,AX073600,AF178654,AB770485
Bovine respiratory syncytial virus	NC_001989	vertebrates,human	1	Paramyxoviridae,Pneumovirus,Bovine respiratory syncytial virus	-	AF092942
Bovine respiratory syncytial virus ATCC51908	NC_001989	vertebrates,human	1	Paramyxoviridae,Pneumovirus,Bovine respiratory syncytial virus	-	AF295543
Bovine rotavirus	NC_011500	vertebrates,human	1	Reoviridae,Rotavirus,Rotavirus A	segment 5	HM363560
Bovine rotavirus	NC_011501	vertebrates,human	42	Reoviridae,Rotavirus,Rotavirus A	segment 7	FJ206164,EU542719,HM363562,EU542716,K02170,FJ206188,EU542714,EU542715,FJ206180,FJ206176,EU542718,FJ206174,FJ206181,FJ206184,DQ494403,EU542717,FJ206189,FJ206172,FJ206165,FJ206179,FJ206166,FJ206192,FJ206185,FJ206178,DQ494404,FJ206182,FJ206171,FJ206191,FJ206167,FJ206190,FJ206186,FJ206175,FJ206187,FJ206173,FJ206226,FJ206168,FJ206183,JX971577,FJ206193,FJ206169,FJ206170,FJ206177
Bovine rotavirus	NC_011502	vertebrates,human	41	Reoviridae,Rotavirus,Rotavirus A	segment 8	EU542713,FJ206158,FJ206139,DQ494402,FJ206120,FJ206133,FJ206148,FJ206116,EU542711,FJ206136,HM363561,FJ206118,FJ206146,FJ206143,EU542708,FJ206138,FJ206130,FJ206131,FJ206152,FJ206110,FJ206122,FJ206123,FJ206126,FJ206157,FJ206108,FJ206134,JX971576,FJ206128,FJ206141,FJ206114,FJ206125,EU542712,FJ206150,EU542709,FJ206155,EU542710,DQ494401,FJ206154,FJ206160,FJ206145,FJ206112
Bovine rotavirus	NC_011503	vertebrates,human	49	Reoviridae,Rotavirus,Rotavirus A	segment 9	FJ206037,FJ217204,FJ206039,EU873014,FJ206073,FJ206082,GQ352366,FJ217205,FJ206047,EU143711,HQ199897,AB077054,FJ206057,FJ206068,FJ206079,FJ206058,AB077056,FJ206077,HM591496,HM235510,GQ352364,U50332,FJ206055,FJ206087,GQ352362,JX971574,AB077058,EU873015,FJ206048,FJ206072,FJ206085,FJ545658,DQ494393,X52650,AB077053,FJ206084,EU828784,EU873013,FJ206088,FJ206044,DQ494394,AB077055,FJ206049,FJ206070,AB07705…
Bovine rotavirus	NC_011504	vertebrates,human	51	Reoviridae,Rotavirus,Rotavirus A	segment 10	EU542721,FJ206109,FJ206137,JX971578,FJ206147,AF166354,FJ206117,EU542722,FJ206113,FJ206140,FJ206111,FJ206144,EU542723,DQ494398,EU873006,DQ494397,FJ206135,EU828786,EU542720,FJ206127,FJ206151,FJ206107,AF166353,FJ206101,FJ206103,HM591494,FJ206129,EU542725,FJ206162,HM363563,FJ206156,FJ206115,FJ206132,EU542724,FJ206161,EU873007,FJ206119,FJ206105,FJ206142,HM591492,FJ206121,EU873008,FJ206124,FJ206149,FJ2…
Bovine rotavirus	NC_011505	vertebrates,human	41	Reoviridae,Rotavirus,Rotavirus A	segment 11	FJ206045,FJ206050,FJ206076,FJ206054,FJ206071,FJ206061,FJ206052,FJ206078,EU542729,EU542731,FJ206091,FJ206046,EU542730,FJ206099,FJ206059,FJ206083,HM363564,FJ206096,FJ206093,FJ206067,DQ494399,FJ206069,FJ206074,FJ206081,FJ206056,FJ206090,FJ206060,DQ494400,FJ206065,EU542727,FJ206092,EU542726,FJ206089,FJ206100,FJ206097,FJ206086,FJ206063,FJ206094,FJ206098,JX971579,EU542728
Bovine rotavirus	NC_011506	vertebrates,human	2	Reoviridae,Rotavirus,Rotavirus A	segment 2	X52589,JX971570
Bovine rotavirus	NC_011507	vertebrates,human	3	Reoviridae,Rotavirus,Rotavirus A	segment 1	JX971569,X55444,J04346
Bovine rotavirus	NC_011508	vertebrates,human	1	Reoviridae,Rotavirus,Rotavirus A	segment 3	JX971571
Bovine rotavirus	NC_011509	vertebrates,human	5	Reoviridae,Rotavirus,Rotavirus A	segment 6	EU873010,EU873011,EU873012,K02254,JX971573
Bovine rotavirus	NC_011510	vertebrates,human	2	Reoviridae,Rotavirus,Rotavirus A	segment 4	JX971572,EU873009
Bovine rotavirus A	NC_011500	vertebrates,human	3	Reoviridae,Rotavirus,Rotavirus A	segment 5	JF693063,JF693041,JF693030
Bovine rotavirus A	NC_011501	vertebrates,human	3	Reoviridae,Rotavirus,Rotavirus A	segment 7	JF693065,AB513838,JF693043
Bovine rotavirus A	NC_011502	vertebrates,human	2	Reoviridae,Rotavirus,Rotavirus A	segment 8	JF693066,JF693044
Bovine rotavirus A	NC_011503	vertebrates,human	26	Reoviridae,Rotavirus,Rotavirus A	segment 9	JX470523,JF720877,JF742652,AB513837,JF693045,JF720878,JX470522,JX470514,JX470516,EF200563,AB454421,JF693067,EF200560,JX470519,EF200549,JF689835,JX470518,EF199501,GU144587,JX470515,JX470521,JX470517,JF720882,JX470520,AB486011,DQ487203
Bovine rotavirus A	NC_011504	vertebrates,human	11	Reoviridae,Rotavirus,Rotavirus A	segment 10	JF693046,EF200578,GU181282,EF200575,EF200574,AY293829,EF200576,EF200573,EF592592,JF693068,EF200572
Bovine rotavirus A	NC_011505	vertebrates,human	7	Reoviridae,Rotavirus,Rotavirus A	segment 11	JF693047,EF200582,JF693069,EF200580,GU937876,EF200581,EF200579
Bovine rotavirus A	NC_011506	vertebrates,human	3	Reoviridae,Rotavirus,Rotavirus A	segment 2	JF693060,JF693027,JF693038
Bovine rotavirus A	NC_011507	vertebrates,human	3	Reoviridae,Rotavirus,Rotavirus A	segment 1	JF693059,JF693037,JF693026
Bovine rotavirus A	NC_011508	vertebrates,human	4	Reoviridae,Rotavirus,Rotavirus A	segment 3	AY300923,JF693061,JF693039,JF693028
Bovine rotavirus A	NC_011509	vertebrates,human	11	Reoviridae,Rotavirus,Rotavirus A	segment 6	JF720875,EF200569,JF693064,JF720873,JF742649,EF200568,JF693042,JF720879,EF200565,JF742650,EF200567
Bovine rotavirus A	NC_011510	vertebrates,human	7	Reoviridae,Rotavirus,Rotavirus A	segment 4	JF693040,JF693029,AB513836,DQ838596,AB454420,AB486010,JF693062
Bovine rotavirus B-11	NC_011510	vertebrates,human	1	Reoviridae,Rotavirus,Rotavirus A	segment 4	AY047488
Bovine rotavirus G10	NC_011504	vertebrates,human	1	Reoviridae,Rotavirus,Rotavirus A	segment 10	AY527227
Bovine rotavirus G15P11	NC_011505	vertebrates,human	1	Reoviridae,Rotavirus,Rotavirus A	segment 11	EU682404
Bovine rotavirus G15P21	NC_011504	vertebrates,human	1	Reoviridae,Rotavirus,Rotavirus A	segment 10	AY527226
Bovine rotavirus G6	NC_011501	vertebrates,human	4	Reoviridae,Rotavirus,Rotavirus A	segment 7	AB748598,AB748600,AB748597,AB748599
Bovine rotavirus G6	NC_011502	vertebrates,human	4	Reoviridae,Rotavirus,Rotavirus A	segment 8	AB748594,AB748595,AB748592,AB748593
Bovine rotavirus G6	NC_011504	vertebrates,human	4	Reoviridae,Rotavirus,Rotavirus A	segment 10	AB748604,AB748603,AB748605,AB748602
Bovine rotavirus strain BRV033	NC_011504	vertebrates,human	1	Reoviridae,Rotavirus,Rotavirus A	segment 10	AF144804
Bovine rotavirus strain RF	NC_011504	vertebrates,human	1	Reoviridae,Rotavirus,Rotavirus A	segment 10	AY116593
Bovine rotavirus strain RF	NC_011508	vertebrates,human	1	Reoviridae,Rotavirus,Rotavirus A	segment 3	AY116592
Buffalo rotavirus A 10733	NC_011503	vertebrates,human	1	Reoviridae,Rotavirus,Rotavirus A	segment 9	AY281360
Buffalo rotavirus A 10733	NC_011505	vertebrates,human	1	Reoviridae,Rotavirus,Rotavirus A	segment 11	EU659853
Bundibugyo ebolavirus	NC_014373	vertebrates,human	5	Filoviridae,Ebolavirus,Bundibugyo ebolavirus	-	KC545394,KC545393,KC545396,FJ217161,KC545395
CAS virus	NC_018481	vertebrates,human	1	Arenaviridae,,CAS virus	segment S	JQ717262
CAS virus	NC_018484	vertebrates,human	1	Arenaviridae,,CAS virus	segment L	JQ717261
Camberwell virus	NC_001959	vertebrates,human	1	Caliciviridae,Norovirus,Norwalk virus	-	AF145896
Canine distemper virus	NC_001921	vertebrates,human	43	Paramyxoviridae,Morbillivirus,Canine distemper virus	-	AB490680,AB475099,EU726268,AB823707,AB490672,AB687721,AB490674,AX453976,AB753775,AY466011,KF914669,AF014953,EU716337,AF305419,AB476401,AB475097,AB490676,AY386316,JN896331,AB462810,AF164967,AB823706,AB490678,AB476402,AB490681,GU138403,AY443350,AX453975,AB490670,AY386315,AY649446,AB490679,AY445077,HM852904,AY542312,AX453977,HM063009,HM046486,AB753776,AB474397,JN896987,AB687720,KC427278
Canine distemper virus strain Onderstepoort	NC_001921	vertebrates,human	1	Paramyxoviridae,Morbillivirus,Canine distemper virus	-	AF378705
Canine rotavirus A79-10/G3P[3]	NC_011500	vertebrates,human	1	Reoviridae,Rotavirus,Rotavirus A	segment 5	EU708940
Canine rotavirus A79-10/G3P[3]	NC_011501	vertebrates,human	1	Reoviridae,Rotavirus,Rotavirus A	segment 7	EU708941
Canine rotavirus A79-10/G3P[3]	NC_011502	vertebrates,human	1	Reoviridae,Rotavirus,Rotavirus A	segment 8	EU708942
Canine rotavirus A79-10/G3P[3]	NC_011503	vertebrates,human	1	Reoviridae,Rotavirus,Rotavirus A	segment 9	EU708939
Canine rotavirus A79-10/G3P[3]	NC_011504	vertebrates,human	1	Reoviridae,Rotavirus,Rotavirus A	segment 10	EU708943
Canine rotavirus A79-10/G3P[3]	NC_011505	vertebrates,human	1	Reoviridae,Rotavirus,Rotavirus A	segment 11	EU708944
Canine rotavirus A79-10/G3P[3]	NC_011506	vertebrates,human	1	Reoviridae,Rotavirus,Rotavirus A	segment 2	EU708935
Canine rotavirus A79-10/G3P[3]	NC_011507	vertebrates,human	1	Reoviridae,Rotavirus,Rotavirus A	segment 1	EU708934
Canine rotavirus A79-10/G3P[3]	NC_011508	vertebrates,human	1	Reoviridae,Rotavirus,Rotavirus A	segment 3	EU708936
Canine rotavirus A79-10/G3P[3]	NC_011509	vertebrates,human	1	Reoviridae,Rotavirus,Rotavirus A	segment 6	EU708938
Canine rotavirus A79-10/G3P[3]	NC_011510	vertebrates,human	1	Reoviridae,Rotavirus,Rotavirus A	segment 4	EU708937
Canine rotavirus CU-1	NC_011500	vertebrates,human	1	Reoviridae,Rotavirus,Rotavirus A	segment 5	EU708918
Canine rotavirus CU-1	NC_011501	vertebrates,human	1	Reoviridae,Rotavirus,Rotavirus A	segment 7	EU708919
Canine rotavirus CU-1	NC_011502	vertebrates,human	1	Reoviridae,Rotavirus,Rotavirus A	segment 8	EU708920
Canine rotavirus CU-1	NC_011503	vertebrates,human	1	Reoviridae,Rotavirus,Rotavirus A	segment 9	EU708917
Canine rotavirus CU-1	NC_011504	vertebrates,human	2	Reoviridae,Rotavirus,Rotavirus A	segment 10	AF144806,EU708921
Canine rotavirus CU-1	NC_011505	vertebrates,human	1	Reoviridae,Rotavirus,Rotavirus A	segment 11	EU708922
Canine rotavirus CU-1	NC_011506	vertebrates,human	1	Reoviridae,Rotavirus,Rotavirus A	segment 2	EU708913
Canine rotavirus CU-1	NC_011507	vertebrates,human	1	Reoviridae,Rotavirus,Rotavirus A	segment 1	EU708912
Canine rotavirus CU-1	NC_011508	vertebrates,human	1	Reoviridae,Rotavirus,Rotavirus A	segment 3	EU708914
Canine rotavirus CU-1	NC_011509	vertebrates,human	1	Reoviridae,Rotavirus,Rotavirus A	segment 6	EU708916
Canine rotavirus CU-1	NC_011510	vertebrates,human	3	Reoviridae,Rotavirus,Rotavirus A	segment 4	EU708915,D13401,L20876
Canine rotavirus K9	NC_011500	vertebrates,human	2	Reoviridae,Rotavirus,Rotavirus A	segment 5	AF111946,EU708929
Canine rotavirus K9	NC_011501	vertebrates,human	1	Reoviridae,Rotavirus,Rotavirus A	segment 7	EU708930
Canine rotavirus K9	NC_011502	vertebrates,human	1	Reoviridae,Rotavirus,Rotavirus A	segment 8	EU708931
Canine rotavirus K9	NC_011503	vertebrates,human	1	Reoviridae,Rotavirus,Rotavirus A	segment 9	EU708928
Canine rotavirus K9	NC_011504	vertebrates,human	1	Reoviridae,Rotavirus,Rotavirus A	segment 10	EU708932
Canine rotavirus K9	NC_011505	vertebrates,human	1	Reoviridae,Rotavirus,Rotavirus A	segment 11	EU708933
Canine rotavirus K9	NC_011506	vertebrates,human	1	Reoviridae,Rotavirus,Rotavirus A	segment 2	EU708924
Canine rotavirus K9	NC_011507	vertebrates,human	1	Reoviridae,Rotavirus,Rotavirus A	segment 1	EU708923
Canine rotavirus K9	NC_011508	vertebrates,human	1	Reoviridae,Rotavirus,Rotavirus A	segment 3	EU708925
Canine rotavirus K9	NC_011509	vertebrates,human	1	Reoviridae,Rotavirus,Rotavirus A	segment 6	EU708927
Canine rotavirus K9	NC_011510	vertebrates,human	2	Reoviridae,Rotavirus,Rotavirus A	segment 4	EU708926,D13400
Canine rotavirus RV198/95	NC_011503	vertebrates,human	1	Reoviridae,Rotavirus,Rotavirus A	segment 9	AF271089
Canine rotavirus RV52/96	NC_011503	vertebrates,human	1	Reoviridae,Rotavirus,Rotavirus A	segment 9	AF271090
Caprine rotavirus A	NC_011500	vertebrates,human	1	Reoviridae,Rotavirus,Rotavirus A	segment 5	GU937883
Caprine rotavirus A	NC_011501	vertebrates,human	2	Reoviridae,Rotavirus,Rotavirus A	segment 7	JQ004978,GU937885
Caprine rotavirus A	NC_011502	vertebrates,human	2	Reoviridae,Rotavirus,Rotavirus A	segment 8	GU937884,JQ004977
Caprine rotavirus A	NC_011503	vertebrates,human	5	Reoviridae,Rotavirus,Rotavirus A	segment 9	GU937882,GU937889,GU937891,JQ004975,AY128708
Caprine rotavirus A	NC_011504	vertebrates,human	2	Reoviridae,Rotavirus,Rotavirus A	segment 10	GU937886,JQ004979
Caprine rotavirus A	NC_011505	vertebrates,human	2	Reoviridae,Rotavirus,Rotavirus A	segment 11	JQ004980,GU937887
Caprine rotavirus A	NC_011506	vertebrates,human	2	Reoviridae,Rotavirus,Rotavirus A	segment 2	JQ004971,GU937878
Caprine rotavirus A	NC_011507	vertebrates,human	2	Reoviridae,Rotavirus,Rotavirus A	segment 1	JQ004970,GU937877
Caprine rotavirus A	NC_011508	vertebrates,human	2	Reoviridae,Rotavirus,Rotavirus A	segment 3	JQ004972,GU937879
Caprine rotavirus A	NC_011509	vertebrates,human	2	Reoviridae,Rotavirus,Rotavirus A	segment 6	GU937881,JQ004974
Caprine rotavirus A	NC_011510	vertebrates,human	2	Reoviridae,Rotavirus,Rotavirus A	segment 4	GU937880,JQ004973
Chandipura virus	NC_020805	vertebrates,human	2	Rhabdoviridae,Vesiculovirus,Chandipura virus	-	GU212858,GU212856
Chandipura virus Dak AR D 111125	NC_020805	vertebrates,human	1	Rhabdoviridae,Vesiculovirus,Chandipura virus	-	HM627187
Chandipura virus IB An 9978	NC_020805	vertebrates,human	1	Rhabdoviridae,Vesiculovirus,Chandipura virus	-	HM627186
Chapare virus	NC_010562	vertebrates,human	1	Arenaviridae,Arenavirus,Chapare virus	segment S	EU260463
Chapare virus	NC_010563	vertebrates,human	1	Arenaviridae,Arenavirus,Chapare virus	segment L	EU260464
Chiba virus	NC_001959	vertebrates,human	1	Caliciviridae,Norovirus,Norwalk virus	-	AB042808
Civet SARS CoV 007/2004	NC_004718	vertebrates,human	1	Coronaviridae,Betacoronavirus,Severe acute respiratory syndrome-related coronavirus	-	AY572034
Civet SARS CoV SZ16/2003	NC_004718	vertebrates,human	1	Coronaviridae,Betacoronavirus,Severe acute respiratory syndrome-related coronavirus	-	AY304488
Civet SARS CoV SZ3/2003	NC_004718	vertebrates,human	1	Coronaviridae,Betacoronavirus,Severe acute respiratory syndrome-related coronavirus	-	AY304486
Colobus guereza papillomavirus type 2	NC_015692	vertebrates,human	1	Papillomaviridae,Betapapillomavirus,Colobus monkey papillomavirus	-	GU014533
Convict Creek 107 virus	NC_005215	vertebrates,human	2	Bunyaviridae,Hantavirus,Sin Nombre virus	segment M	L33684,L33474
Convict Creek 107 virus	NC_005216	vertebrates,human	2	Bunyaviridae,Hantavirus,Sin Nombre virus	segment S	U47135,L33816
Convict Creek 107 virus	NC_005217	vertebrates,human	1	Bunyaviridae,Hantavirus,Sin Nombre virus	segment L	AF425256
Cote d'Ivoire ebolavirus	NC_014372	vertebrates,human	1	Filoviridae,Ebolavirus,Tai Forest ebolavirus	-	FJ217162
Coxsackievirus A16	NC_001612	vertebrates,human	22	Picornaviridae,Enterovirus,Enterovirus A	-	KC755235,KF193630,KF193622,KF193629,KC755234,KC755228,KF193628,KF193620,KC755232,KF193624,KF193625,KC755230,KF193621,KF193631,KC755233,KC755229,KF193632,KC507895,KF193623,KC755231,KF193627,KF193626
Coxsackievirus A2	NC_001612	vertebrates,human	4	Picornaviridae,Enterovirus,Enterovirus A	-	JX867332,JX867331,JX867333,JX867330
Coxsackievirus A24	NC_002058	vertebrates,human	1	Picornaviridae,Enterovirus,Enterovirus C	-	KF725085
Coxsackievirus A7	NC_001612	vertebrates,human	4	Picornaviridae,Enterovirus,Enterovirus A	-	GU942820,GU942823,GU942821,GU942822
Cupixi virus	NC_010252	vertebrates,human	1	Arenaviridae,Arenavirus,Cupixi virus	segment L	AY216519
Cupixi virus	NC_010254	vertebrates,human	1	Arenaviridae,Arenavirus,Cupixi virus	segment S	AF512832
Cutthroat trout virus	NC_015521	vertebrates,human	1	Hepeviridae,,Cutthroat trout virus	-	HQ731075
Dobrava-Belgrade virus	NC_005233	vertebrates,human	15	Bunyaviridae,Hantavirus,Dobrava-Belgrade virus	segment S	AY961615,AY533120,AY961618,AY533118,AJ009775,JQ026204,AJ009773,AJ410615,AF442622,AJ131673,JF920150,AY168576,AJ131672,L41916,AJ410619
Dobrava-Belgrade virus	NC_005234	vertebrates,human	8	Bunyaviridae,Hantavirus,Dobrava-Belgrade virus	segment M	AY961616,AY168577,AJ009774,AY168578,JQ026205,JF920149,AJ410616,L33685
Dobrava-Belgrade virus	NC_005235	vertebrates,human	3	Bunyaviridae,Hantavirus,Dobrava-Belgrade virus	segment L	AJ410617,JQ026206,JF920148
Dolphin morbillivirus	NC_005283	vertebrates,human	1	Paramyxoviridae,Morbillivirus,Cetacean morbillivirus	-	AJ608288
Duvenhage virus	NC_020810	vertebrates,human	4	Rhabdoviridae,Lyssavirus,Duvenhage virus	-	EU293120,EU293119,EU623444,JN986749
Ebola virus - Mayinga, Zaire, 1976	NC_002549	vertebrates,human	1	Filoviridae,Ebolavirus,Zaire ebolavirus	-	AF086833
Echovirus 1 (strain Farouk / ATCC VR-1038)	NC_001472	vertebrates,human	1	Picornaviridae,Enterovirus,Enterovirus B	-	AF029859
Echovirus 9 (strain Barty)	NC_001472	vertebrates,human	1	Picornaviridae,Enterovirus,Enterovirus B	-	X92886
Echovirus 9 (strain Hill)	NC_001472	vertebrates,human	1	Picornaviridae,Enterovirus,Enterovirus B	-	X84981
Echovirus E25	NC_001472	vertebrates,human	1	Picornaviridae,Enterovirus,Enterovirus B	-	JX976772
Echovirus E30	NC_001472	vertebrates,human	6	Picornaviridae,Enterovirus,Enterovirus B	-	KC897073,JX854435,JX976773,EF066392,EF066391,AY948442
Echovirus E6	NC_001472	vertebrates,human	9	Picornaviridae,Enterovirus,Enterovirus B	-	JQ929657,JX976771,KF042343,AB705309,KF042342,AB705311,AB705308,AB705310,JQ801739
Echovirus E9	NC_001472	vertebrates,human	4	Picornaviridae,Enterovirus,Enterovirus B	-	KC238668,JN596587,KC238669,KC238667
Enterovirus 5666/sin/002209	NC_001612	vertebrates,human	1	Picornaviridae,Enterovirus,Enterovirus A	-	AF352027
Enterovirus 5865/sin/000009	NC_001612	vertebrates,human	1	Picornaviridae,Enterovirus,Enterovirus A	-	AF316321
Enterovirus A	NC_001612	vertebrates,human	1	Picornaviridae,Enterovirus,Enterovirus A	-	U05876
Enterovirus A71	NC_001612	vertebrates,human	28	Picornaviridae,Enterovirus,Enterovirus A	-	AB747374,AB747373,KC296444,KF134486,KF142412,KF312457,KC296445,KF142411,KF142413,AB747375,KC436270,KF668443,KC954664,KF154355,KC954662,KC436271,KC436268,KC436272,KC570452,KC436269,KC296443,KC436266,KC954663,KC570453,KC436267,KC436265,JQ514785,KF501389
Enterovirus B	NC_001472	vertebrates,human	5	Picornaviridae,Enterovirus,Enterovirus B	-	KC568448,KC568449,KC568447,KC568446,M16560
Enterovirus B87	NC_001472	vertebrates,human	1	Picornaviridae,Enterovirus,Enterovirus B	-	KC292019
Enterovirus B97	NC_001472	vertebrates,human	1	Picornaviridae,Enterovirus,Enterovirus B	-	GU550508
Enterovirus CA55-1988	NC_001472	vertebrates,human	1	Picornaviridae,Enterovirus,Enterovirus B	-	AF241359
Enterovirus Yanbian 96-83csf	NC_001472	vertebrates,human	1	Picornaviridae,Enterovirus,Enterovirus B	-	AF230973
Equine rotavirus A	NC_011500	vertebrates,human	1	Reoviridae,Rotavirus,Rotavirus A	segment 5	JX036371
Equine rotavirus A	NC_011501	vertebrates,human	6	Reoviridae,Rotavirus,Rotavirus A	segment 7	KC815700,JX036373,JQ309143,KC815677,KC815688,KC815666
Equine rotavirus A	NC_011502	vertebrates,human	6	Reoviridae,Rotavirus,Rotavirus A	segment 8	JQ309142,KC815665,KC815687,KC815676,JX036372,KC815699
Equine rotavirus A	NC_011503	vertebrates,human	14	Reoviridae,Rotavirus,Rotavirus A	segment 9	KC815674,AB595975,AY750925,AB595976,AB595979,AB595978,AB595977,L49042,JX036370,L49043,AB595974,AY750924,KC815685,KC815663
Equine rotavirus A	NC_011504	vertebrates,human	5	Reoviridae,Rotavirus,Rotavirus A	segment 10	KC815689,KC815667,JX036374,KC815701,KC815678
Equine rotavirus A	NC_011505	vertebrates,human	3	Reoviridae,Rotavirus,Rotavirus A	segment 11	KC815668,JX036375,JQ309144
Equine rotavirus A	NC_011506	vertebrates,human	6	Reoviridae,Rotavirus,Rotavirus A	segment 2	KC815681,JX036366,JQ309139,KC815695,KC815659,KC815670
Equine rotavirus A	NC_011507	vertebrates,human	6	Reoviridae,Rotavirus,Rotavirus A	segment 1	KC815680,JQ309138,KC815694,KC815669,KC815658,JX036365
Equine rotavirus A	NC_011508	vertebrates,human	7	Reoviridae,Rotavirus,Rotavirus A	segment 3	KC815696,JX036367,KC815660,KC815671,KC815682,JQ309140,AY277922
Equine rotavirus A	NC_011509	vertebrates,human	5	Reoviridae,Rotavirus,Rotavirus A	segment 6	KC815697,KC815662,JX036369,KC815673,KC815684
Equine rotavirus A	NC_011510	vertebrates,human	3	Reoviridae,Rotavirus,Rotavirus A	segment 4	KC815672,KC815661,KC815683
European bat lyssavirus 1	NC_009527	vertebrates,human	8	Rhabdoviridae,Lyssavirus,European bat lyssavirus 1	-	KF042301,EU626551,KF042302,EF157976,EU293112,KF155003,EU626552,EU293109
European bat lyssavirus 2	NC_009528	vertebrates,human	3	Rhabdoviridae,Lyssavirus,European bat lyssavirus 2	-	KF155004,EF157977,EU293114
Fer-de-lance virus	NC_005084	vertebrates,human	1	Paramyxoviridae,Ferlavirus,Fer-de-Lance paramyxovirus	-	AY141760
Ferret hepatitis E virus	NC_001434	vertebrates,human	2	Hepeviridae,Hepevirus,Hepatitis E virus	-	JN998606,JN998607
Flexal virus	NC_010757	vertebrates,human	2	Arenaviridae,Arenavirus,Flexal virus	segment S	AF512831,AF485257
Flexal virus	NC_010759	vertebrates,human	1	Arenaviridae,Arenavirus,Flexal virus	segment L	EU627611
GB virus C	NC_001710	vertebrates,human	48	Flaviviridae,Pegivirus,GB virus C	-	KC618398,AB013500,JN127373,D87710,AY949771,U45966,D87712,AF031828,U44402,D87263,AB003293,U75356,D90600,AF006500,AB008335,D87711,AF121950,U36380,HQ331233,AB013501,AB003289,AB008342,D87708,AF081782,KC618399,AB018667,AB008336,KC618401,AF031827,AF031829,AF104403,AB003288,U63715,HQ331235,AB003292,D87255,D87715,KC618400,U94695,D90601,D87713,AB003290,D87262,HQ331234,AB021287,D87714,D87709,AY196904
GB virus C variant troglodytes	NC_001710	vertebrates,human	1	Flaviviridae,Pegivirus,GB virus C	-	AF070476
Giant panda rotavirus A	NC_011502	vertebrates,human	1	Reoviridae,Rotavirus,Rotavirus A	segment 8	GU188281
Giant panda rotavirus A	NC_011504	vertebrates,human	1	Reoviridae,Rotavirus,Rotavirus A	segment 10	GU188282
Giant panda rotavirus A	NC_011505	vertebrates,human	1	Reoviridae,Rotavirus,Rotavirus A	segment 11	GU329526
Giant panda rotavirus A	NC_011506	vertebrates,human	1	Reoviridae,Rotavirus,Rotavirus A	segment 2	HQ641294
Golden Gate virus	NC_018482	vertebrates,human	1	Arenaviridae,,Golden Gate virus	segment L	JQ717263
Golden Gate virus	NC_018483	vertebrates,human	1	Arenaviridae,,Golden Gate virus	segment S	JQ717264
Goose paramyxovirus SF02	NC_005036	vertebrates,human	1	Paramyxoviridae,Avulavirus,Goose paramyxovirus SF02	-	AF473851
Guanarito virus	NC_005077	vertebrates,human	3	Arenaviridae,Arenavirus,Guanarito virus	segment S	AY129247,AY497548,AF485258
Guanarito virus	NC_005082	vertebrates,human	2	Arenaviridae,Arenavirus,Guanarito virus	segment L	AY216504,AY358024
HBV genotype A	NC_003977	vertebrates,human	1	Hepadnaviridae,Orthohepadnavirus,Hepatitis B virus	-	AP007263
HBV genotype A1	NC_003977	vertebrates,human	6	Hepadnaviridae,Orthohepadnavirus,Hepatitis B virus	-	HE974375,HE974381,HE974370,HE974363,HE974365,HE974362
HBV genotype A2	NC_003977	vertebrates,human	6	Hepadnaviridae,Orthohepadnavirus,Hepatitis B virus	-	HE974383,HE974364,HE974371,HE974374,HE974376,HE974367
HBV genotype B	NC_003977	vertebrates,human	3	Hepadnaviridae,Orthohepadnavirus,Hepatitis B virus	-	AB602818,AB554017,AB540582
HBV genotype C	NC_003977	vertebrates,human	19	Hepadnaviridae,Orthohepadnavirus,Hepatitis B virus	-	AB554020,AB540585,AB644286,AB644287,AB644280,AB554021,AB644281,AB560662,AB644284,AB554014,AB560661,AB554019,AB644283,AB554025,AB540584,AB554022,AB554015,AB540583,AB554018
HBV genotype D	NC_003977	vertebrates,human	4	Hepadnaviridae,Orthohepadnavirus,Hepatitis B virus	-	HE815465,AB554016,AB554024,AB554023
HBV genotype D3	NC_003977	vertebrates,human	2	Hepadnaviridae,Orthohepadnavirus,Hepatitis B virus	-	HE974377,HE974379
HBV genotype D4	NC_003977	vertebrates,human	4	Hepadnaviridae,Orthohepadnavirus,Hepatitis B virus	-	HE974372,HE974378,HE974373,HE974382
HBV genotype E	NC_003977	vertebrates,human	3	Hepadnaviridae,Orthohepadnavirus,Hepatitis B virus	-	HE974384,HE974380,AP007262
HBV genotype F2	NC_003977	vertebrates,human	2	Hepadnaviridae,Orthohepadnavirus,Hepatitis B virus	-	HE974366,HE974369
HBV genotype F4	NC_003977	vertebrates,human	1	Hepadnaviridae,Orthohepadnavirus,Hepatitis B virus	-	HE974368
HBV genotype G	NC_003977	vertebrates,human	1	Hepadnaviridae,Orthohepadnavirus,Hepatitis B virus	-	AP007264
HBV genotype H	NC_003977	vertebrates,human	6	Hepadnaviridae,Orthohepadnavirus,Hepatitis B virus	-	AB516393,AB516395,AP007261,AB516394,AB846650,AB298362
HBV recombinant B/C	NC_003977	vertebrates,human	1	Hepadnaviridae,Orthohepadnavirus,Hepatitis B virus	-	AB644282
HBV recombinant C/G	NC_003977	vertebrates,human	1	Hepadnaviridae,Orthohepadnavirus,Hepatitis B virus	-	AB644285
HIV-1 CRF03_AB	NC_001802	vertebrates,human	1	Retroviridae,Lentivirus,Human immunodeficiency virus 1	-	AF193276
HIV-1 CRF04_cpx	NC_001802	vertebrates,human	1	Retroviridae,Lentivirus,Human immunodeficiency virus 1	-	AF049337
HIV-1 M_02CD.KS069	NC_001802	vertebrates,human	1	Retroviridae,Lentivirus,Human immunodeficiency virus 1	-	FM877780
HIV-1 M_02CD.LBTB032	NC_001802	vertebrates,human	1	Retroviridae,Lentivirus,Human immunodeficiency virus 1	-	FM877779
HIV-1 M_02CD.LBTB084	NC_001802	vertebrates,human	1	Retroviridae,Lentivirus,Human immunodeficiency virus 1	-	FM877781
HIV-1 M_02CD.MBTB047	NC_001802	vertebrates,human	1	Retroviridae,Lentivirus,Human immunodeficiency virus 1	-	FM877782
HIV-1 M_97CD.KFE267	NC_001802	vertebrates,human	1	Retroviridae,Lentivirus,Human immunodeficiency virus 1	-	FM877778
HIV-1 M_97CD.KTB119	NC_001802	vertebrates,human	1	Retroviridae,Lentivirus,Human immunodeficiency virus 1	-	FM877777
HIV-1 M_97CD.MBFE250	NC_001802	vertebrates,human	1	Retroviridae,Lentivirus,Human immunodeficiency virus 1	-	FM877783
Hantaan virus	NC_005218	vertebrates,human	25	Bunyaviridae,Hantavirus,Hantaan virus	segment S	AF427322,AF427324,JQ665905,AY748309,AF321094,D25533,AY017064,U37768,M14626,EF595840,HQ611981,AF427318,AB620031,JQ665906,AF427320,AB127998,D25530,AF427319,AB027111,AB027097,AF321095,AB027101,DQ658415,AF427323,AY839871
Hantaan virus	NC_005219	vertebrates,human	16	Bunyaviridae,Hantavirus,Hantaan virus	segment M	JQ665881,AB027115,EU074224,AB127995,AB030232,AB620032,U37729,D25532,Y00386,L08753,EU074672,U38177,AF345636,M14627,D25529,JQ665882
Hantaan virus	NC_005222	vertebrates,human	6	Bunyaviridae,Hantavirus,Hantaan virus	segment L	D25528,AB620033,D25531,X55901,DQ989237,AF336826
Hantaan virus 84FLi	NC_005218	vertebrates,human	1	Bunyaviridae,Hantavirus,Hantaan virus	segment S	AF366568
Hantaan virus 84FLi	NC_005219	vertebrates,human	1	Bunyaviridae,Hantavirus,Hantaan virus	segment M	AF366569
Hantaan virus A16	NC_005218	vertebrates,human	1	Bunyaviridae,Hantavirus,Hantaan virus	segment S	AF288646
Hantaan virus A16	NC_005219	vertebrates,human	1	Bunyaviridae,Hantavirus,Hantaan virus	segment M	AF288645
Hantaan virus A9	NC_005219	vertebrates,human	1	Bunyaviridae,Hantavirus,Hantaan virus	segment M	AF035831
Hantaan virus CA09082007	NC_005218	vertebrates,human	1	Bunyaviridae,Hantavirus,Hantaan virus	segment S	HQ834499
Hantaan virus CA10081109	NC_005218	vertebrates,human	1	Bunyaviridae,Hantavirus,Hantaan virus	segment S	HQ834500
Hantaan virus CA10081113	NC_005218	vertebrates,human	1	Bunyaviridae,Hantavirus,Hantaan virus	segment S	HQ834501
Hantaan virus CA10081203	NC_005218	vertebrates,human	1	Bunyaviridae,Hantavirus,Hantaan virus	segment S	HQ834502
Hantaan virus CA10081206	NC_005218	vertebrates,human	1	Bunyaviridae,Hantavirus,Hantaan virus	segment S	HQ834503
Hantaan virus CA10081708	NC_005218	vertebrates,human	1	Bunyaviridae,Hantavirus,Hantaan virus	segment S	HQ834504
Hantaan virus CA10081905	NC_005218	vertebrates,human	1	Bunyaviridae,Hantavirus,Hantaan virus	segment S	HQ834505
Hantaan virus E142	NC_005218	vertebrates,human	1	Bunyaviridae,Hantavirus,Hantaan virus	segment S	AF288644
Hantaan virus H10150	NC_005218	vertebrates,human	1	Bunyaviridae,Hantavirus,Hantaan virus	segment S	HQ834506
Hantaan virus Lee	NC_005219	vertebrates,human	1	Bunyaviridae,Hantavirus,Hantaan virus	segment M	D00377
Hantaan virus N8	NC_005219	vertebrates,human	1	Bunyaviridae,Hantavirus,Hantaan virus	segment M	EF077656
Hantaan virus P09072	NC_005218	vertebrates,human	1	Bunyaviridae,Hantavirus,Hantaan virus	segment S	HQ834507
Hantaan virus Q32	NC_005219	vertebrates,human	1	Bunyaviridae,Hantavirus,Hantaan virus	segment M	DQ371905
Hantaan virus Q32	NC_005222	vertebrates,human	1	Bunyaviridae,Hantavirus,Hantaan virus	segment L	DQ371906
Hantaanvirus CGAa1011	NC_005218	vertebrates,human	1	Bunyaviridae,Hantavirus,Hantaan virus	segment S	EF990913
Hantaanvirus CGAa1011	NC_005219	vertebrates,human	1	Bunyaviridae,Hantavirus,Hantaan virus	segment M	EF990927
Hantaanvirus CGAa1015	NC_005218	vertebrates,human	1	Bunyaviridae,Hantavirus,Hantaan virus	segment S	EF990912
Hantaanvirus CGAa1015	NC_005219	vertebrates,human	1	Bunyaviridae,Hantavirus,Hantaan virus	segment M	EF990926
Hantaanvirus CGAa2	NC_005218	vertebrates,human	1	Bunyaviridae,Hantavirus,Hantaan virus	segment S	EU092219
Hantaanvirus CGAa2	NC_005219	vertebrates,human	1	Bunyaviridae,Hantavirus,Hantaan virus	segment M	EU092223
Hantaanvirus CGAa31MP7	NC_005218	vertebrates,human	1	Bunyaviridae,Hantavirus,Hantaan virus	segment S	EF990911
Hantaanvirus CGAa31MP7	NC_005219	vertebrates,human	1	Bunyaviridae,Hantavirus,Hantaan virus	segment M	EF990925
Hantaanvirus CGAa31P9	NC_005218	vertebrates,human	1	Bunyaviridae,Hantavirus,Hantaan virus	segment S	EF990910
Hantaanvirus CGAa31P9	NC_005219	vertebrates,human	1	Bunyaviridae,Hantavirus,Hantaan virus	segment M	EF990924
Hantaanvirus CGAa4MP9	NC_005218	vertebrates,human	1	Bunyaviridae,Hantavirus,Hantaan virus	segment S	EF990915
Hantaanvirus CGAa4MP9	NC_005219	vertebrates,human	1	Bunyaviridae,Hantavirus,Hantaan virus	segment M	EF990929
Hantaanvirus CGAa4P15	NC_005218	vertebrates,human	1	Bunyaviridae,Hantavirus,Hantaan virus	segment S	EF990914
Hantaanvirus CGAa4P15	NC_005219	vertebrates,human	1	Bunyaviridae,Hantavirus,Hantaan virus	segment M	EF990928
Hantaanvirus CGAa75	NC_005218	vertebrates,human	1	Bunyaviridae,Hantavirus,Hantaan virus	segment S	EU092220
Hantaanvirus CGAa75	NC_005219	vertebrates,human	1	Bunyaviridae,Hantavirus,Hantaan virus	segment M	EU092224
Hantaanvirus CGHu1	NC_005218	vertebrates,human	1	Bunyaviridae,Hantavirus,Hantaan virus	segment S	EU092218
Hantaanvirus CGHu1	NC_005219	vertebrates,human	1	Bunyaviridae,Hantavirus,Hantaan virus	segment M	EU092222
Hantaanvirus CGHu3612	NC_005218	vertebrates,human	1	Bunyaviridae,Hantavirus,Hantaan virus	segment S	EF990909
Hantaanvirus CGHu3612	NC_005219	vertebrates,human	1	Bunyaviridae,Hantavirus,Hantaan virus	segment M	EF990923
Hantaanvirus CGHu3614	NC_005218	vertebrates,human	1	Bunyaviridae,Hantavirus,Hantaan virus	segment S	EF990908
Hantaanvirus CGHu3614	NC_005219	vertebrates,human	1	Bunyaviridae,Hantavirus,Hantaan virus	segment M	EF990922
Hantaanvirus CGRn45	NC_005218	vertebrates,human	1	Bunyaviridae,Hantavirus,Hantaan virus	segment S	EU092221
Hantaanvirus CGRn45	NC_005219	vertebrates,human	1	Bunyaviridae,Hantavirus,Hantaan virus	segment M	EU092225
Hantaanvirus CGRn53	NC_005218	vertebrates,human	1	Bunyaviridae,Hantavirus,Hantaan virus	segment S	EF990907
Hantaanvirus CGRn53	NC_005219	vertebrates,human	1	Bunyaviridae,Hantavirus,Hantaan virus	segment M	EF990921
Hantaanvirus CGRn5310	NC_005218	vertebrates,human	1	Bunyaviridae,Hantavirus,Hantaan virus	segment S	EF990906
Hantaanvirus CGRn5310	NC_005219	vertebrates,human	1	Bunyaviridae,Hantavirus,Hantaan virus	segment M	EF990920
Hantaanvirus CGRn93MP8	NC_005218	vertebrates,human	1	Bunyaviridae,Hantavirus,Hantaan virus	segment S	EF990905
Hantaanvirus CGRn93MP8	NC_005219	vertebrates,human	1	Bunyaviridae,Hantavirus,Hantaan virus	segment M	EF990919
Hantaanvirus CGRn93P8	NC_005218	vertebrates,human	1	Bunyaviridae,Hantavirus,Hantaan virus	segment S	EF990904
Hantaanvirus CGRn93P8	NC_005219	vertebrates,human	1	Bunyaviridae,Hantavirus,Hantaan virus	segment M	EF990918
Hantavirus CJAp93	NC_005218	vertebrates,human	1	Bunyaviridae,Hantavirus,Hantaan virus	segment S	EF208929
Hantavirus CJAp93	NC_005219	vertebrates,human	1	Bunyaviridae,Hantavirus,Hantaan virus	segment M	EF208930
Hantavirus Gou3-v9	NC_005236	vertebrates,human	1	Bunyaviridae,Hantavirus,Seoul virus	segment S	AF288651
Hantavirus LR1	NC_005218	vertebrates,human	1	Bunyaviridae,Hantavirus,Hantaan virus	segment S	AF288294
Hantavirus LR1	NC_005219	vertebrates,human	1	Bunyaviridae,Hantavirus,Hantaan virus	segment M	AF288293
Hantavirus LR1	NC_005222	vertebrates,human	1	Bunyaviridae,Hantavirus,Hantaan virus	segment L	AF288292
Hantavirus RG9	NC_005218	vertebrates,human	1	Bunyaviridae,Hantavirus,Hantaan virus	segment S	AF288296
Hantavirus S85-46	NC_005218	vertebrates,human	1	Bunyaviridae,Hantavirus,Hantaan virus	segment S	AF288659
Hantavirus S85-46	NC_005219	vertebrates,human	1	Bunyaviridae,Hantavirus,Hantaan virus	segment M	AF288658
Hantavirus SN7	NC_005218	vertebrates,human	1	Bunyaviridae,Hantavirus,Hantaan virus	segment S	AF288657
Hantavirus SN7	NC_005219	vertebrates,human	1	Bunyaviridae,Hantavirus,Hantaan virus	segment M	AF288656
Hantavirus Z10	NC_006433	vertebrates,human	2	Bunyaviridae,Hantavirus,Hantavirus Z10	segment S	EF533944,AF184987
Hantavirus Z10	NC_006435	vertebrates,human	1	Bunyaviridae,Hantavirus,Hantavirus Z10	segment L	AF189155
Hantavirus Z10	NC_006437	vertebrates,human	2	Bunyaviridae,Hantavirus,Hantavirus Z10	segment M	AF276987,AF143675
Hantavirus Z37	NC_005236	vertebrates,human	1	Bunyaviridae,Hantavirus,Seoul virus	segment S	AF187082
Hantavirus Z37	NC_005237	vertebrates,human	2	Bunyaviridae,Hantavirus,Seoul virus	segment M	AF187081,AF190119
Hantavirus Z37	NC_005238	vertebrates,human	1	Bunyaviridae,Hantavirus,Seoul virus	segment L	AF285266
Hantavirus strain CJilin93	NC_005219	vertebrates,human	1	Bunyaviridae,Hantavirus,Hantaan virus	segment M	AY748307
Hantavirus strain YU61	NC_005218	vertebrates,human	1	Bunyaviridae,Hantavirus,Hantaan virus	segment S	AY748308
Hawaii calicivirus	NC_001959	vertebrates,human	1	Caliciviridae,Norovirus,Norwalk virus	-	U07611
Hendra virus	NC_001906	vertebrates,human	13	Paramyxoviridae,Henipavirus,Hendra virus	-	HM044318,HM044321,JN255801,HM044320,JN255802,JN255806,JN255800,HM044317,JN255805,HM044319,JN255803,AF017149,JN255804
Hepatitis B virus	NC_003977	vertebrates,human	5003	Hepadnaviridae,Orthohepadnavirus,Hepatitis B virus	-	GQ377610,X59795,JQ040171,JN257172,EU306678,EU916228,AB014372,JN040759,GU456658,JX026877,AF418690,AY800391,AY738144,AB195942,DQ823093,AB205191,GQ183474,AB330372,JN792915,AB014389,DQ089760,JN642143,AB900109,FJ386642,EU306702,JQ801498,EU306680,HM750150,HQ700441,DQ993702,JN040762,AB287317,AB674411,GU815656,JX507213,AJ627218,KC510656,DQ975273,EU939675,HM750147,FJ349240,JF828932,FN594754,GQ161801,AF223…
EU859956,AM421538,JQ801472,EU594382,GU815687,EU594409,EF103277,EU594402,EU939566,DQ377161,DQ089791,FR714496,JN040784,JN257217,AB014376,JN792896,AY781178,GQ377565,EU570073,JQ801512,JQ664502,FJ562264,EU594386,DQ315780,HM363586,JN040755,AB302942,JX507211,AB074047,HQ236016,AJ627221,KF679997,AB014391,AB670263,AB222712,AM421545,FJ023647,JN040754,EU939621,FJ349238,FJ904440,GU815750,AB670257,JX026886,JF4…
Hepatitis B virus 146/Thailand	NC_003977	vertebrates,human	1	Hepadnaviridae,Orthohepadnavirus,Hepatitis B virus	-	FJ361772
Hepatitis B virus ayw/Japan/Ehime 22-HS/2005	NC_003977	vertebrates,human	1	Hepadnaviridae,Orthohepadnavirus,Hepatitis B virus	-	AB267090
Hepatitis B virus subgenotype A3/genotype E	NC_003977	vertebrates,human	1	Hepadnaviridae,Orthohepadnavirus,Hepatitis B virus	-	HF571060
Hepatitis B virus subtype adr	NC_003977	vertebrates,human	2	Hepadnaviridae,Orthohepadnavirus,Hepatitis B virus	-	AB176642,AB299858
Hepatitis B virus subtype adw	NC_003977	vertebrates,human	3	Hepadnaviridae,Orthohepadnavirus,Hepatitis B virus	-	D00331,D00330,D00329
Hepatitis B virus subtype adw2	NC_003977	vertebrates,human	1	Hepadnaviridae,Orthohepadnavirus,Hepatitis B virus	-	AM282986
Hepatitis C virus	NC_009827,NC_009826,NC_009825,NC_009824,NC_004102,NC_009823	vertebrates,human	269	Flaviviridae,Hepacivirus,Hepatitis C virus	-	HQ738645,EU362892,EU362907,JX014307,KC155254,JX183554,FJ407092,FJ462433,AB047645,HQ850284,AB049096,DQ418785,EF407480,JF735113,EF407418,AB080299,D89815,KC197235,EF407451,EF407438,EU246930,EU362903,D13558,EU362881,D45172,EU246933,DQ988075,FJ462441,AB049093,JF735117,AM408911,KC248196,EU362895,FJ462436,AB049098,EF407460,AB559564,JX183557,DQ988076,AJ000009,KC197227,EU158186,EU362876,EF407465,JF735120,…
Hepatitis C virus (isolate 6a33)	NC_009827,NC_009826,NC_009825,NC_009824,NC_004102,NC_009823	vertebrates,human	1	Flaviviridae,Hepacivirus,Hepatitis C virus	-	AY859526
Hepatitis C virus (isolate BEBE1)	NC_009827,NC_009826,NC_009825,NC_009824,NC_004102,NC_009823	vertebrates,human	1	Flaviviridae,Hepacivirus,Hepatitis C virus	-	D50409
Hepatitis C virus (isolate D54)	NC_009827,NC_009826,NC_009825,NC_009824,NC_004102,NC_009823	vertebrates,human	1	Flaviviridae,Hepacivirus,Hepatitis C virus	-	DQ155561
Hepatitis C virus (isolate EUHK2)	NC_009827,NC_009826,NC_009825,NC_009824,NC_004102,NC_009823	vertebrates,human	1	Flaviviridae,Hepacivirus,Hepatitis C virus	-	Y12083
Hepatitis C virus (isolate H77)	NC_009827,NC_009826,NC_009825,NC_009824,NC_004102,NC_009823	vertebrates,human	3	Flaviviridae,Hepacivirus,Hepatitis C virus	-	AF011752,AF011753,AF011751
Hepatitis C virus (isolate HC-G9)	NC_009827,NC_009826,NC_009825,NC_009824,NC_004102,NC_009823	vertebrates,human	1	Flaviviridae,Hepacivirus,Hepatitis C virus	-	D14853
Hepatitis C virus (isolate HCV-K3a/650)	NC_009827,NC_009826,NC_009825,NC_009824,NC_004102,NC_009823	vertebrates,human	1	Flaviviridae,Hepacivirus,Hepatitis C virus	-	D28917
Hepatitis C virus (isolate India)	NC_009827,NC_009826,NC_009825,NC_009824,NC_004102,NC_009823	vertebrates,human	1	Flaviviridae,Hepacivirus,Hepatitis C virus	-	AY051292
Hepatitis C virus (isolate JK046)	NC_009827,NC_009826,NC_009825,NC_009824,NC_004102,NC_009823	vertebrates,human	1	Flaviviridae,Hepacivirus,Hepatitis C virus	-	D63822
Hepatitis C virus (isolate JK049)	NC_009827,NC_009826,NC_009825,NC_009824,NC_004102,NC_009823	vertebrates,human	1	Flaviviridae,Hepacivirus,Hepatitis C virus	-	D63821
Hepatitis C virus (isolate JPUT971017)	NC_009827,NC_009826,NC_009825,NC_009824,NC_004102,NC_009823	vertebrates,human	1	Flaviviridae,Hepacivirus,Hepatitis C virus	-	AB030907
Hepatitis C virus (isolate Tr Kj)	NC_009827,NC_009826,NC_009825,NC_009824,NC_004102,NC_009823	vertebrates,human	1	Flaviviridae,Hepacivirus,Hepatitis C virus	-	D49374
Hepatitis C virus (isolate VAT96)	NC_009827,NC_009826,NC_009825,NC_009824,NC_004102,NC_009823	vertebrates,human	1	Flaviviridae,Hepacivirus,Hepatitis C virus	-	AB031663
Hepatitis C virus (isolate VN004)	NC_009827,NC_009826,NC_009825,NC_009824,NC_004102,NC_009823	vertebrates,human	1	Flaviviridae,Hepacivirus,Hepatitis C virus	-	D84265
Hepatitis C virus (isolate VN235)	NC_009827,NC_009826,NC_009825,NC_009824,NC_004102,NC_009823	vertebrates,human	1	Flaviviridae,Hepacivirus,Hepatitis C virus	-	D84263
Hepatitis C virus (isolate VN405)	NC_009827,NC_009826,NC_009825,NC_009824,NC_004102,NC_009823	vertebrates,human	1	Flaviviridae,Hepacivirus,Hepatitis C virus	-	D84264
Hepatitis C virus ED43	NC_009827,NC_009826,NC_009825,NC_009824,NC_004102,NC_009823	vertebrates,human	1	Flaviviridae,Hepacivirus,Hepatitis C virus	-	GU814265
Hepatitis C virus JFH-1	NC_009827,NC_009826,NC_009825,NC_009824,NC_004102,NC_009823	vertebrates,human	1	Flaviviridae,Hepacivirus,Hepatitis C virus	-	AB047639
Hepatitis C virus S52	NC_009827,NC_009826,NC_009825,NC_009824,NC_004102,NC_009823	vertebrates,human	1	Flaviviridae,Hepacivirus,Hepatitis C virus	-	GU814263
Hepatitis C virus SA13	NC_009827,NC_009826,NC_009825,NC_009824,NC_004102,NC_009823	vertebrates,human	1	Flaviviridae,Hepacivirus,Hepatitis C virus	-	AF064490
Hepatitis C virus genotype 3	NC_009827,NC_009826,NC_009825,NC_009824,NC_004102,NC_009823	vertebrates,human	1	Flaviviridae,Hepacivirus,Hepatitis C virus	-	JN588558
Hepatitis C virus genotype 6	NC_009827,NC_009826,NC_009825,NC_009824,NC_004102,NC_009823	vertebrates,human	3	Flaviviridae,Hepacivirus,Hepatitis C virus	-	D84262,KC844040,KC844039
Hepatitis C virus isolate M2123	NC_009827,NC_009826,NC_009825,NC_009824,NC_004102,NC_009823	vertebrates,human	1	Flaviviridae,Hepacivirus,Hepatitis C virus	-	AB558135
Hepatitis C virus strain M21-2k/1b	NC_009827,NC_009826,NC_009825,NC_009824,NC_004102,NC_009823	vertebrates,human	1	Flaviviridae,Hepacivirus,Hepatitis C virus	-	FJ821465
Hepatitis C virus subtype 1a	NC_009827,NC_009826,NC_009825,NC_009824,NC_004102,NC_009823	vertebrates,human	435	Flaviviridae,Hepacivirus,Hepatitis C virus	-	EU255991,EU256013,EU155295,EU862828,EU256053,EU155285,EU155323,EU781773,EU660384,EU660385,EU256028,EU239716,EU255993,EU155237,FJ390399,EU155344,EU155252,FJ024278,EU255965,EU482862,FJ024280,EU256003,EU660383,EU155349,EU255975,JX463550,EU155314,EU255937,EU255989,JX463563,EU482867,EU255994,FJ024087,EU255945,EU256097,EU781781,EU256106,EU482843,EU781790,EU256024,EU482836,EU781767,FJ390394,EU862823,FJ1…
Hepatitis C virus subtype 1b	NC_009827,NC_009826,NC_009825,NC_009824,NC_004102,NC_009823	vertebrates,human	269	Flaviviridae,Hepacivirus,Hepatitis C virus	-	AF356827,AF165060,EU482880,EU155280,AF165045,EU155362,AB154206,AF176573,EU155372,EU155220,EU660386,EU256065,EU155324,EU256099,EU155369,AB154185,AB154202,EU155303,M96362,M84754,EU256103,AB442222,EU256092,AB154182,AF165063,EU155307,AB154191,KC844051,AF483269,EU256001,EU155279,DQ071885,EU482885,EU155360,AB154192,AF207753,AB154186,EU155308,EU155229,EU256054,EF032893,AF207763,AB154203,EU155356,EU25608…
Hepatitis C virus subtype 1c	NC_009827,NC_009826,NC_009825,NC_009824,NC_004102,NC_009823	vertebrates,human	1	Flaviviridae,Hepacivirus,Hepatitis C virus	-	KC844047
Hepatitis C virus subtype 1g	NC_009827,NC_009826,NC_009825,NC_009824,NC_004102,NC_009823	vertebrates,human	1	Flaviviridae,Hepacivirus,Hepatitis C virus	-	AM910652
Hepatitis C virus subtype 2a	NC_009827,NC_009826,NC_009825,NC_009824,NC_004102,NC_009823	vertebrates,human	15	Flaviviridae,Hepacivirus,Hepatitis C virus	-	KF676351,AF169004,AF238484,AB690461,AF238485,AF169003,AF238482,KC844043,AF238481,AB690460,AF238483,AF169002,KF676352,AF169005,AY746460
Hepatitis C virus subtype 2b	NC_009827,NC_009826,NC_009825,NC_009824,NC_004102,NC_009823	vertebrates,human	22	Flaviviridae,Hepacivirus,Hepatitis C virus	-	KC844048,AY232738,AY232745,AY232733,AY232746,AY232742,AY232735,AY232749,AY232747,AY232743,AY232734,AY232740,AY232737,AF238486,AY232732,AY232731,AY232744,AY232730,AY232739,AY232741,AY232736,AY232748
Hepatitis C virus subtype 2f	NC_009827,NC_009826,NC_009825,NC_009824,NC_004102,NC_009823	vertebrates,human	2	Flaviviridae,Hepacivirus,Hepatitis C virus	-	KC844042,KC844050
Hepatitis C virus subtype 3a	NC_009827,NC_009826,NC_009825,NC_009824,NC_004102,NC_009823	vertebrates,human	19	Flaviviridae,Hepacivirus,Hepatitis C virus	-	KF035124,AB792683,JQ717255,KF035125,KF035123,KC844041,JQ717256,JQ717258,GQ275355,JQ717259,AF046866,JQ717257,JN714194,KF035127,JQ717254,KF035126,AB691595,AB691596,JQ717260
Hepatitis C virus subtype 3b	NC_009827,NC_009826,NC_009825,NC_009824,NC_004102,NC_009823	vertebrates,human	1	Flaviviridae,Hepacivirus,Hepatitis C virus	-	KC844044
Hepatitis C virus subtype 4a	NC_009827,NC_009826,NC_009825,NC_009824,NC_004102,NC_009823	vertebrates,human	8	Flaviviridae,Hepacivirus,Hepatitis C virus	-	DQ418784,DQ418788,DQ418787,DQ516084,DQ418789,AB795432,DQ418783,DQ418782
Hepatitis C virus subtype 4d	NC_009827,NC_009826,NC_009825,NC_009824,NC_004102,NC_009823	vertebrates,human	3	Flaviviridae,Hepacivirus,Hepatitis C virus	-	KC844045,DQ516083,DQ418786
Hepatitis C virus subtype 4f	NC_009827,NC_009826,NC_009825,NC_009824,NC_004102,NC_009823	vertebrates,human	2	Flaviviridae,Hepacivirus,Hepatitis C virus	-	EF589161,EF589160
Hepatitis C virus subtype 5a	NC_009827,NC_009826,NC_009825,NC_009824,NC_004102,NC_009823	vertebrates,human	1	Flaviviridae,Hepacivirus,Hepatitis C virus	-	KC844046
Hepatitis C virus subtype 6a	NC_009827,NC_009826,NC_009825,NC_009824,NC_004102,NC_009823	vertebrates,human	15	Flaviviridae,Hepacivirus,Hepatitis C virus	-	DQ480519,DQ480521,DQ480518,DQ480520,KC844037,DQ480515,DQ480512,DQ480514,DQ480523,DQ480513,KC844038,DQ480516,DQ480524,DQ480522,DQ480517
Hepatitis C virus subtype 6c	NC_009827,NC_009826,NC_009825,NC_009824,NC_004102,NC_009823	vertebrates,human	1	Flaviviridae,Hepacivirus,Hepatitis C virus	-	EF424629
Hepatitis C virus subtype 6e	NC_009827,NC_009826,NC_009825,NC_009824,NC_004102,NC_009823	vertebrates,human	1	Flaviviridae,Hepacivirus,Hepatitis C virus	-	DQ314805
Hepatitis C virus subtype 6f	NC_009827,NC_009826,NC_009825,NC_009824,NC_004102,NC_009823	vertebrates,human	2	Flaviviridae,Hepacivirus,Hepatitis C virus	-	DQ835764,DQ835760
Hepatitis C virus subtype 6g	NC_009827,NC_009826,NC_009825,NC_009824,NC_004102,NC_009823	vertebrates,human	1	Flaviviridae,Hepacivirus,Hepatitis C virus	-	DQ314806
Hepatitis C virus subtype 6i	NC_009827,NC_009826,NC_009825,NC_009824,NC_004102,NC_009823	vertebrates,human	2	Flaviviridae,Hepacivirus,Hepatitis C virus	-	DQ835762,DQ835770
Hepatitis C virus subtype 6j	NC_009827,NC_009826,NC_009825,NC_009824,NC_004102,NC_009823	vertebrates,human	2	Flaviviridae,Hepacivirus,Hepatitis C virus	-	DQ835769,DQ835761
Hepatitis C virus subtype 6k	NC_009827,NC_009826,NC_009825,NC_009824,NC_004102,NC_009823	vertebrates,human	4	Flaviviridae,Hepacivirus,Hepatitis C virus	-	DQ278893,AY878651,DQ278891,AY878650
Hepatitis C virus subtype 6l	NC_009827,NC_009826,NC_009825,NC_009824,NC_004102,NC_009823	vertebrates,human	1	Flaviviridae,Hepacivirus,Hepatitis C virus	-	EF424628
Hepatitis C virus subtype 6m	NC_009827,NC_009826,NC_009825,NC_009824,NC_004102,NC_009823	vertebrates,human	4	Flaviviridae,Hepacivirus,Hepatitis C virus	-	DQ835767,DQ835763,DQ835766,DQ835765
Hepatitis C virus subtype 6n	NC_009827,NC_009826,NC_009825,NC_009824,NC_004102,NC_009823	vertebrates,human	3	Flaviviridae,Hepacivirus,Hepatitis C virus	-	DQ835768,DQ278894,AY878652
Hepatitis C virus subtype 6o	NC_009827,NC_009826,NC_009825,NC_009824,NC_004102,NC_009823	vertebrates,human	1	Flaviviridae,Hepacivirus,Hepatitis C virus	-	EF424627
Hepatitis C virus subtype 6p	NC_009827,NC_009826,NC_009825,NC_009824,NC_004102,NC_009823	vertebrates,human	1	Flaviviridae,Hepacivirus,Hepatitis C virus	-	EF424626
Hepatitis C virus subtype 6q	NC_009827,NC_009826,NC_009825,NC_009824,NC_004102,NC_009823	vertebrates,human	1	Flaviviridae,Hepacivirus,Hepatitis C virus	-	EF424625
Hepatitis C virus subtype 6v	NC_009827,NC_009826,NC_009825,NC_009824,NC_004102,NC_009823	vertebrates,human	2	Flaviviridae,Hepacivirus,Hepatitis C virus	-	EU798761,EU798760
Hepatitis E virus	NC_001434	vertebrates,human	189	Hepeviridae,Hepevirus,Hepatitis E virus	-	AB189074,AB291963,AB248521,AB780451,JF443719,DQ450072,AB222184,D11092,AF051830,AB291966,AB220971,AY575858,FJ653660,AB369689,AB290313,AF455784,AB193177,AB074915,AF076239,X98292,AB480825,AY723745,JN906976,AB301710,L08816,AB437316,JF443725,JX121233,JX565469,AB291967,EF077630,M94177,EF570133,AB291953,JQ953665,AB521805,JQ953664,AB443624,AB362840,AB099347,JQ655734,AB698654,AB189073,M73218,JF443721,AB44…
Hepatitis E virus type 3	NC_001434	vertebrates,human	1	Hepeviridae,Hepevirus,Hepatitis E virus	-	AB593690
Hepatitis G virus isolate PEI	NC_001710	vertebrates,human	1	Flaviviridae,Pegivirus,GB virus C	-	AF309966
Hepatitis delta virus	NC_001653	vertebrates,human	108	Deltavirus,Hepatitis delta virus	-	HQ005370,AM183329,HQ005365,AB037949,AB118842,M84917,AJ584849,AJ584844,HM046802,AB118849,AY633627,AB118821,AB118839,AB118837,AB118829,M28267,M92448,KF660598,AM183332,HQ005364,AB118820,AB118832,EF514905,D01075,M58629,AB118818,AB118833,AJ307077,AB037948,U81989,HQ005366,AB118827,AY648956,HQ005371,AM183331,HF679405,AY648958,AB118844,HQ005367,AY261460,GU177114,AJ584845,AB118846,AB118845,AB118826,AB1188…
Hepatitis delta virus dFr2012	NC_001653	vertebrates,human	1	Deltavirus,Hepatitis delta virus	-	AM902177
Hepatitis delta virus dFr2040	NC_001653	vertebrates,human	1	Deltavirus,Hepatitis delta virus	-	AM902178
Hepatitis delta virus dFr2042	NC_001653	vertebrates,human	1	Deltavirus,Hepatitis delta virus	-	AM902179
Hepatitis delta virus dFr2043	NC_001653	vertebrates,human	1	Deltavirus,Hepatitis delta virus	-	AM902180
Hepatitis delta virus dFr2045	NC_001653	vertebrates,human	1	Deltavirus,Hepatitis delta virus	-	AM902168
Hepatitis delta virus dFr2046	NC_001653	vertebrates,human	1	Deltavirus,Hepatitis delta virus	-	AM779580
Hepatitis delta virus dFr2067	NC_001653	vertebrates,human	1	Deltavirus,Hepatitis delta virus	-	AM902163
Hepatitis delta virus dFr2119	NC_001653	vertebrates,human	1	Deltavirus,Hepatitis delta virus	-	AM779575
Hepatitis delta virus dFr2137	NC_001653	vertebrates,human	1	Deltavirus,Hepatitis delta virus	-	AM902164
Hepatitis delta virus dFr2172	NC_001653	vertebrates,human	1	Deltavirus,Hepatitis delta virus	-	AM902165
Hepatitis delta virus dFr2189	NC_001653	vertebrates,human	1	Deltavirus,Hepatitis delta virus	-	AM902166
Hepatitis delta virus dFr2201	NC_001653	vertebrates,human	1	Deltavirus,Hepatitis delta virus	-	AM902167
Hepatitis delta virus dFr2210	NC_001653	vertebrates,human	1	Deltavirus,Hepatitis delta virus	-	AM902181
Hepatitis delta virus dFr2236	NC_001653	vertebrates,human	1	Deltavirus,Hepatitis delta virus	-	AM902169
Hepatitis delta virus dFr2239b	NC_001653	vertebrates,human	1	Deltavirus,Hepatitis delta virus	-	AM779578
Hepatitis delta virus dFr2244	NC_001653	vertebrates,human	1	Deltavirus,Hepatitis delta virus	-	AM902170
Hepatitis delta virus dFr2258	NC_001653	vertebrates,human	1	Deltavirus,Hepatitis delta virus	-	AM902171
Hepatitis delta virus dFr2264	NC_001653	vertebrates,human	1	Deltavirus,Hepatitis delta virus	-	AM902172
Hepatitis delta virus dFr2284	NC_001653	vertebrates,human	1	Deltavirus,Hepatitis delta virus	-	AM779577
Hepatitis delta virus dFr2380	NC_001653	vertebrates,human	1	Deltavirus,Hepatitis delta virus	-	AM902173
Hepatitis delta virus dFr2395	NC_001653	vertebrates,human	1	Deltavirus,Hepatitis delta virus	-	AM779579
Hepatitis delta virus dFr2404	NC_001653	vertebrates,human	1	Deltavirus,Hepatitis delta virus	-	AM902174
Hepatitis delta virus dFr2406	NC_001653	vertebrates,human	1	Deltavirus,Hepatitis delta virus	-	AM902175
Hepatitis delta virus dFr2411	NC_001653	vertebrates,human	1	Deltavirus,Hepatitis delta virus	-	AM902176
Hepatitis delta virus dFr2544	NC_001653	vertebrates,human	1	Deltavirus,Hepatitis delta virus	-	AM779576
Hepatitis delta virus dFr508	NC_001653	vertebrates,human	1	Deltavirus,Hepatitis delta virus	-	AM779574
Hepatitis delta virus dTk1	NC_001653	vertebrates,human	1	Deltavirus,Hepatitis delta virus	-	AM779581
Hepatitis delta virus dTk10	NC_001653	vertebrates,human	1	Deltavirus,Hepatitis delta virus	-	AM779583
Hepatitis delta virus dTk12	NC_001653	vertebrates,human	1	Deltavirus,Hepatitis delta virus	-	AM779595
Hepatitis delta virus dTk13	NC_001653	vertebrates,human	1	Deltavirus,Hepatitis delta virus	-	AM779593
Hepatitis delta virus dTk2	NC_001653	vertebrates,human	1	Deltavirus,Hepatitis delta virus	-	AM779597
Hepatitis delta virus dTk21	NC_001653	vertebrates,human	1	Deltavirus,Hepatitis delta virus	-	AM779596
Hepatitis delta virus dTk27	NC_001653	vertebrates,human	1	Deltavirus,Hepatitis delta virus	-	AM779594
Hepatitis delta virus dTk28	NC_001653	vertebrates,human	1	Deltavirus,Hepatitis delta virus	-	AM779586
Hepatitis delta virus dTk3	NC_001653	vertebrates,human	1	Deltavirus,Hepatitis delta virus	-	AM779589
Hepatitis delta virus dTk34	NC_001653	vertebrates,human	1	Deltavirus,Hepatitis delta virus	-	AM779588
Hepatitis delta virus dTk35	NC_001653	vertebrates,human	1	Deltavirus,Hepatitis delta virus	-	AM779582
Hepatitis delta virus dTk38	NC_001653	vertebrates,human	1	Deltavirus,Hepatitis delta virus	-	AM779590
Hepatitis delta virus dTk4	NC_001653	vertebrates,human	1	Deltavirus,Hepatitis delta virus	-	AM779584
Hepatitis delta virus dTk5	NC_001653	vertebrates,human	1	Deltavirus,Hepatitis delta virus	-	AM779591
Hepatitis delta virus dTk6	NC_001653	vertebrates,human	1	Deltavirus,Hepatitis delta virus	-	AM779585
Hepatitis delta virus dTk7	NC_001653	vertebrates,human	1	Deltavirus,Hepatitis delta virus	-	AM779587
Hepatitis delta virus dTk8	NC_001653	vertebrates,human	1	Deltavirus,Hepatitis delta virus	-	AM779592
HoJo virus	NC_005219	vertebrates,human	1	Bunyaviridae,Hantavirus,Hantaan virus	segment M	D00376
Horsepox virus	NC_006998	vertebrates,human	1	Poxviridae,Orthopoxvirus,Vaccinia virus	-	DQ792504
Hu39694 virus	NC_003467	vertebrates,human	1	Bunyaviridae,Hantavirus,Andes virus	segment M	AF028023
Human Respiratory syncytial virus 9320	NC_001781	vertebrates,human	1	Paramyxoviridae,Pneumovirus,Human respiratory syncytial virus	-	AY353550
Human adenovirus 1	NC_001405	vertebrates,human	3	Adenoviridae,Mastadenovirus,Human adenovirus C	-	KF429744,KF268331,AF534906
Human adenovirus 11	NC_011202	vertebrates,human	2	Adenoviridae,Mastadenovirus,Human adenovirus B	-	FJ643676,AF532578
Human adenovirus 11	NC_011203	vertebrates,human	2	Adenoviridae,Mastadenovirus,Human adenovirus B	-	FJ643676,AF532578
Human adenovirus 11a	NC_011202	vertebrates,human	1	Adenoviridae,Mastadenovirus,Human adenovirus B	-	FJ597732
Human adenovirus 11a	NC_011203	vertebrates,human	1	Adenoviridae,Mastadenovirus,Human adenovirus B	-	FJ597732
Human adenovirus 14	NC_011202	vertebrates,human	4	Adenoviridae,Mastadenovirus,Human adenovirus B	-	FJ822614,JX892927,AY803294,JN032132
Human adenovirus 14	NC_011203	vertebrates,human	4	Adenoviridae,Mastadenovirus,Human adenovirus B	-	FJ822614,JX892927,AY803294,JN032132
Human adenovirus 15	NC_010956,NC_012959	vertebrates,human	3	Adenoviridae,Mastadenovirus,Human adenovirus D	-	AB562586,KF268201,KF268329
Human adenovirus 16	NC_011202	vertebrates,human	2	Adenoviridae,Mastadenovirus,Human adenovirus B	-	JN860680,AY601636
Human adenovirus 16	NC_011203	vertebrates,human	2	Adenoviridae,Mastadenovirus,Human adenovirus B	-	JN860680,AY601636
Human adenovirus 17	NC_010956,NC_012959	vertebrates,human	3	Adenoviridae,Mastadenovirus,Human adenovirus D	-	KF268330,HQ910407,AF108105
Human adenovirus 18	NC_001460	vertebrates,human	1	Adenoviridae,Mastadenovirus,Human adenovirus A	-	GU191019
Human adenovirus 19	NC_010956,NC_012959	vertebrates,human	7	Adenoviridae,Mastadenovirus,Human adenovirus D	-	KF268323,EF121005,AB448773,AB448774,AB448772,AB448771,JQ326209
Human adenovirus 2	NC_001405	vertebrates,human	1	Adenoviridae,Mastadenovirus,Human adenovirus C	-	KF268310
Human adenovirus 20	NC_010956,NC_012959	vertebrates,human	1	Adenoviridae,Mastadenovirus,Human adenovirus D	-	KF268207
Human adenovirus 21	NC_011202	vertebrates,human	1	Adenoviridae,Mastadenovirus,Human adenovirus B	-	AY601633
Human adenovirus 21	NC_011203	vertebrates,human	1	Adenoviridae,Mastadenovirus,Human adenovirus B	-	AY601633
Human adenovirus 22	NC_010956,NC_012959	vertebrates,human	2	Adenoviridae,Mastadenovirus,Human adenovirus D	-	FJ619037,FJ404771
Human adenovirus 23	NC_010956,NC_012959	vertebrates,human	1	Adenoviridae,Mastadenovirus,Human adenovirus D	-	KF279629
Human adenovirus 26	NC_010956,NC_012959	vertebrates,human	1	Adenoviridae,Mastadenovirus,Human adenovirus D	-	EF153474
Human adenovirus 28	NC_010956,NC_012959	vertebrates,human	2	Adenoviridae,Mastadenovirus,Human adenovirus D	-	KF268320,FJ824826
Human adenovirus 29	NC_010956,NC_012959	vertebrates,human	1	Adenoviridae,Mastadenovirus,Human adenovirus D	-	AB562587
Human adenovirus 3	NC_011202	vertebrates,human	7	Adenoviridae,Mastadenovirus,Human adenovirus B	-	KF268212,KF268210,KF268202,AY599834,AY599836,KF268315,KF429752
Human adenovirus 3	NC_011203	vertebrates,human	7	Adenoviridae,Mastadenovirus,Human adenovirus B	-	KF268212,KF268210,KF268202,AY599834,AY599836,KF268315,KF429752
Human adenovirus 3+11p	NC_011202	vertebrates,human	2	Adenoviridae,Mastadenovirus,Human adenovirus B	-	EF564600,EF564601
Human adenovirus 3+11p	NC_011203	vertebrates,human	2	Adenoviridae,Mastadenovirus,Human adenovirus B	-	EF564600,EF564601
Human adenovirus 3+7	NC_011202	vertebrates,human	1	Adenoviridae,Mastadenovirus,Human adenovirus B	-	JN860679
Human adenovirus 3+7	NC_011203	vertebrates,human	1	Adenoviridae,Mastadenovirus,Human adenovirus B	-	JN860679
Human adenovirus 3-16	NC_011202	vertebrates,human	1	Adenoviridae,Mastadenovirus,Human adenovirus B	-	JN860678
Human adenovirus 3-16	NC_011203	vertebrates,human	1	Adenoviridae,Mastadenovirus,Human adenovirus B	-	JN860678
Human adenovirus 30	NC_010956,NC_012959	vertebrates,human	1	Adenoviridae,Mastadenovirus,Human adenovirus D	-	KF268335
Human adenovirus 31	NC_001460	vertebrates,human	1	Adenoviridae,Mastadenovirus,Human adenovirus A	-	AM749299
Human adenovirus 32	NC_010956,NC_012959	vertebrates,human	2	Adenoviridae,Mastadenovirus,Human adenovirus D	-	KF268325,KF268327
Human adenovirus 33	NC_010956,NC_012959	vertebrates,human	1	Adenoviridae,Mastadenovirus,Human adenovirus D	-	KF268322
Human adenovirus 34	NC_011202	vertebrates,human	2	Adenoviridae,Mastadenovirus,Human adenovirus B	-	KF268328,AY737797
Human adenovirus 34	NC_011203	vertebrates,human	2	Adenoviridae,Mastadenovirus,Human adenovirus B	-	KF268328,AY737797
Human adenovirus 35	NC_011202	vertebrates,human	2	Adenoviridae,Mastadenovirus,Human adenovirus B	-	AY128640,AY271307
Human adenovirus 35	NC_011203	vertebrates,human	2	Adenoviridae,Mastadenovirus,Human adenovirus B	-	AY128640,AY271307
Human adenovirus 36	NC_010956,NC_012959	vertebrates,human	1	Adenoviridae,Mastadenovirus,Human adenovirus D	-	GQ384080
Human adenovirus 37	NC_010956,NC_012959	vertebrates,human	9	Adenoviridae,Mastadenovirus,Human adenovirus D	-	AB448775,KF268208,KF268324,AB448778,AB448777,AB448776,KF268203,DQ900900,KF268334
Human adenovirus 38	NC_010956,NC_012959	vertebrates,human	1	Adenoviridae,Mastadenovirus,Human adenovirus D	-	KF268312
Human adenovirus 4	NC_010956,NC_012959	vertebrates,human	1	Adenoviridae,Mastadenovirus,Human adenovirus D	-	KF268313
Human adenovirus 4	NC_011202	vertebrates,human	1	Adenoviridae,Mastadenovirus,Human adenovirus B	-	KF429748
Human adenovirus 4	NC_011203	vertebrates,human	1	Adenoviridae,Mastadenovirus,Human adenovirus B	-	KF429748
Human adenovirus 43	NC_010956,NC_012959	vertebrates,human	1	Adenoviridae,Mastadenovirus,Human adenovirus D	-	KC529648
Human adenovirus 46	NC_010956,NC_012959	vertebrates,human	3	Adenoviridae,Mastadenovirus,Human adenovirus D	-	KF268332,AY875648,KF268211
Human adenovirus 48	NC_010956,NC_012959	vertebrates,human	1	Adenoviridae,Mastadenovirus,Human adenovirus D	-	EF153473
Human adenovirus 49	NC_010956,NC_012959	vertebrates,human	1	Adenoviridae,Mastadenovirus,Human adenovirus D	-	DQ393829
Human adenovirus 5	NC_001405	vertebrates,human	2	Adenoviridae,Mastadenovirus,Human adenovirus C	-	AY601635,M73260
Human adenovirus 50	NC_011202	vertebrates,human	1	Adenoviridae,Mastadenovirus,Human adenovirus B	-	AY737798
Human adenovirus 50	NC_011203	vertebrates,human	1	Adenoviridae,Mastadenovirus,Human adenovirus B	-	AY737798
Human adenovirus 53	NC_010956,NC_012959	vertebrates,human	1	Adenoviridae,Mastadenovirus,Human adenovirus D	-	FJ169625
Human adenovirus 54	NC_010956,NC_012959	vertebrates,human	1	Adenoviridae,Mastadenovirus,Human adenovirus D	-	AB448770
Human adenovirus 55	NC_011202	vertebrates,human	3	Adenoviridae,Mastadenovirus,Human adenovirus B	-	JX123028,JX123029,JX123027
Human adenovirus 55	NC_011203	vertebrates,human	3	Adenoviridae,Mastadenovirus,Human adenovirus B	-	JX123028,JX123029,JX123027
Human adenovirus 56	NC_010956,NC_012959	vertebrates,human	1	Adenoviridae,Mastadenovirus,Human adenovirus D	-	KF268209
Human adenovirus 6	NC_001405	vertebrates,human	2	Adenoviridae,Mastadenovirus,Human adenovirus C	-	FJ349096,HQ413315
Human adenovirus 60 MPW-2011	NC_010956,NC_012959	vertebrates,human	1	Adenoviridae,Mastadenovirus,Human adenovirus D	-	HQ007053
Human adenovirus 64	NC_010956,NC_012959	vertebrates,human	4	Adenoviridae,Mastadenovirus,Human adenovirus D	-	JQ326206,JQ326207,JQ326208,KF268213
Human adenovirus 67	NC_010956,NC_012959	vertebrates,human	1	Adenoviridae,Mastadenovirus,Human adenovirus D	-	AP012302
Human adenovirus 7	NC_011202	vertebrates,human	10	Adenoviridae,Mastadenovirus,Human adenovirus B	-	AY601634,JF800905,AY594256,HQ659699,KF268314,AY594255,AY495969,KF268316,GQ478341,JX625134
Human adenovirus 7	NC_011203	vertebrates,human	10	Adenoviridae,Mastadenovirus,Human adenovirus B	-	AY601634,JF800905,AY594256,HQ659699,KF268314,AY594255,AY495969,KF268316,GQ478341,JX625134
Human adenovirus 7d2	NC_011202	vertebrates,human	1	Adenoviridae,Mastadenovirus,Human adenovirus B	-	JN860677
Human adenovirus 7d2	NC_011203	vertebrates,human	1	Adenoviridae,Mastadenovirus,Human adenovirus B	-	JN860677
Human adenovirus 7h	NC_011202	vertebrates,human	1	Adenoviridae,Mastadenovirus,Human adenovirus B	-	JN860676
Human adenovirus 7h	NC_011203	vertebrates,human	1	Adenoviridae,Mastadenovirus,Human adenovirus B	-	JN860676
Human adenovirus 8	NC_010956,NC_012959	vertebrates,human	14	Adenoviridae,Mastadenovirus,Human adenovirus D	-	KF268333,KF429743,KF429746,AB448768,AB448767,KF429750,KF429747,KF429745,KF429751,KF268205,AB448769,KF429749,KF268321,KF429753
Human adenovirus 9	NC_010956,NC_012959	vertebrates,human	1	Adenoviridae,Mastadenovirus,Human adenovirus D	-	KF268206
Human adenovirus A	NC_001460	vertebrates,human	2	Adenoviridae,Mastadenovirus,Human adenovirus A	-	KF268119,X73487
Human adenovirus B	NC_011202	vertebrates,human	31	Adenoviridae,Mastadenovirus,Human adenovirus B	-	JX423384,KF633445,AY163756,JX423385,JX491639,JX423386,KF268311,KF268133,JX423380,KF268120,DQ099432,KF268125,KF268124,KF268134,JX423382,KF268121,KF268117,KF268128,KF268196,JX423383,KF268132,KF268123,KF268135,KF268126,JX423388,AY598970,EF011630,JX423387,DQ105654,KF268131,JX423381
Human adenovirus B	NC_011203	vertebrates,human	31	Adenoviridae,Mastadenovirus,Human adenovirus B	-	JX423384,KF633445,JX423385,JX491639,JX423386,KF268311,KF268133,JX423380,KF268120,DQ099432,KF268125,DQ086466,KF268124,KF268134,JX423382,KF268121,KF268117,KF268128,KF268196,JX423383,KF268132,KF268123,KF268135,KF268126,JX423388,AY598970,EF011630,JX423387,DQ105654,KF268131,JX423381
Human adenovirus C	NC_001405	vertebrates,human	18	Adenoviridae,Mastadenovirus,Human adenovirus C	-	KF268199,JX173086,JX173085,KF268130,JX173080,JX423389,KF429754,JX173079,JX173083,J01917,AY339865,JX173078,KF268129,JX173082,KF268127,JX173084,JX173077,JX173081
Human adenovirus CR/France/2008	NC_010956,NC_012959	vertebrates,human	1	Adenoviridae,Mastadenovirus,Human adenovirus D	-	HM770721
Human adenovirus D	NC_010956,NC_012959	vertebrates,human	15	Adenoviridae,Mastadenovirus,Human adenovirus D	-	KF268197,JN162672,AB605242,AB605240,KF268122,AB605243,AB605244,AB605245,AB605246,KF268118,AB605241,AJ854486,KF268198,AB562588,JN162671
Human adenovirus D B172/Dhaka City	NC_010956,NC_012959	vertebrates,human	1	Adenoviridae,Mastadenovirus,Human adenovirus D	-	AP012285
Human adenovirus JJS-2010	NC_001405	vertebrates,human	1	Adenoviridae,Mastadenovirus,Human adenovirus C	-	HQ003817
Human adenovirus MZ	NC_001460	vertebrates,human	1	Adenoviridae,Mastadenovirus,Human adenovirus A	-	JF964962
Human astrovirus	NC_001943	vertebrates,human	5	Astroviridae,Mamastrovirus,Mamastrovirus 1	-	FJ375759,JF327666,AF141381,AB308374,L13745
Human astrovirus 1	NC_001943	vertebrates,human	5	Astroviridae,Mamastrovirus,Mamastrovirus 1	-	L23513,AY720892,HQ398856,KF211475,JN887820
Human astrovirus 1 Beijing/128/2005/CHN	NC_001943	vertebrates,human	1	Astroviridae,Mamastrovirus,Mamastrovirus 1	-	FJ755402
Human astrovirus 1 Beijing/176/2006/CHN	NC_001943	vertebrates,human	1	Astroviridae,Mamastrovirus,Mamastrovirus 1	-	FJ755403
[truncated: 4,454 more rows]
