# Supplementary material for: Enhanced virome sequencing using targeted sequence capture
Source: HighWire-hosted journal article supplement (doi:10.1101/gr.191049.115), 2015-09-22
Supplement: ViroCap-1.0.zip [file ViroCap_taxonomy_size.xlsx]

## Sheet: ViroCap_Viruses_sized.xls
AccessionID	Size (nt)	Division	Rank	ScientificName	TaxId	ParentTaxId	PubDate	Rank1	Rank2	Rank3	Rank4	Rank5	Rank6	Superkingdom	Family	Genus	Species	Order	Subfamily	Subgenus	Subspecies
209842	7734	Viruses	no rank	Human adenovirus 5	28285	129951	1993-04-27 01:00:00	dsDNA viruses, no RNA stage						Viruses	Adenoviridae	Mastadenovirus	Human mastadenovirus C
1477654	301	Viruses	no rank	Canine adenovirus 1	10512	10537	1993-04-23 01:00:00	dsDNA viruses, no RNA stage						Viruses	Adenoviridae	Mastadenovirus	Canine mastadenovirus A
1732265	28995	Viruses	no rank	Canine adenovirus 2	10514	10537	1993-04-28 01:00:00	dsDNA viruses, no RNA stage						Viruses	Adenoviridae	Mastadenovirus	Canine mastadenovirus A
4416335	16768	Viruses	no rank	Human adenovirus 17	46922	130310	1996-05-20 01:00:00	dsDNA viruses, no RNA stage						Viruses	Adenoviridae	Mastadenovirus	Human mastadenovirus D
6446580	30944	Viruses	species	Murine mastadenovirus A	129956	10509	2000-06-22 13:35:00	dsDNA viruses, no RNA stage						Viruses	Adenoviridae	Mastadenovirus
6466454	103	Viruses	no rank	Fowl adenovirus 9	172864	190064	2001-10-12 19:01:00	dsDNA viruses, no RNA stage						Viruses	Adenoviridae	Aviadenovirus	Fowl aviadenovirus D
9626158	35937	Viruses	species	Human mastadenovirus C	129951	10509	2000-06-22 13:18:00	dsDNA viruses, no RNA stage						Viruses	Adenoviridae	Mastadenovirus
9626553	34214	Viruses	species	Human mastadenovirus F	130309	10509	2000-06-23 17:12:00	dsDNA viruses, no RNA stage						Viruses	Adenoviridae	Mastadenovirus
9626621	34125	Viruses	species	Human mastadenovirus A	129875	10509	2000-06-21 14:42:00	dsDNA viruses, no RNA stage						Viruses	Adenoviridae	Mastadenovirus
9628835	43804	Viruses	species	Fowl aviadenovirus A	190061	10552	2002-03-19 18:01:00	dsDNA viruses, no RNA stage						Viruses	Adenoviridae	Aviadenovirus
9629096	30536	Viruses	species	Canine mastadenovirus A	10537	10509	1993-04-23 01:00:00	dsDNA viruses, no RNA stage						Viruses	Adenoviridae	Mastadenovirus
9629466	33213	Viruses	species	Duck adenovirus A	130328	100953	2000-06-26 11:42:00	dsDNA viruses, no RNA stage						Viruses	Adenoviridae	Atadenovirus
9630091	34446	Viruses	species	Bovine mastadenovirus B	129950	10509	2000-06-22 13:12:00	dsDNA viruses, no RNA stage						Viruses	Adenoviridae	Mastadenovirus
9630778	26263	Viruses	species	Turkey siadenovirus A	298333	129876	2004-10-19 18:05:18	dsDNA viruses, no RNA stage						Viruses	Adenoviridae	Siadenovirus
9633173	45063	Viruses	species	Fowl aviadenovirus D	190064	10552	2002-03-20 18:19:00	dsDNA viruses, no RNA stage						Viruses	Adenoviridae	Aviadenovirus
9635795	26163	Viruses	no rank	Frog adenovirus 1	114102	298331	2000-07-23 12:00:00	dsDNA viruses, no RNA stage						Viruses	Adenoviridae	Siadenovirus	Frog siadenovirus A
9845468	33034	Viruses	species	Ovine mastadenovirus A	114424	10509	2000-02-02 09:48:00	dsDNA viruses, no RNA stage						Viruses	Adenoviridae	Mastadenovirus
13487858	32621	Viruses	species	Porcine mastadenovirus C	130371	10509	2000-09-08 12:00:00	dsDNA viruses, no RNA stage						Viruses	Adenoviridae	Mastadenovirus
17105037	16757	Viruses	no rank	Simian adenovirus 25	175567	130308	2001-11-28 18:01:00	dsDNA viruses, no RNA stage						Viruses	Adenoviridae	Mastadenovirus	Human mastadenovirus E
31339691	31390	Viruses	no rank	Human adenovirus 11	10541	565303	1993-04-28 01:00:00	dsDNA viruses, no RNA stage	Human adenovirus B2					Viruses	Adenoviridae	Mastadenovirus	Human mastadenovirus B
32967018	31220	Viruses	no rank	Human adenovirus 35	10522	565303	1993-08-04 01:00:00	dsDNA viruses, no RNA stage	Human adenovirus B2					Viruses	Adenoviridae	Mastadenovirus	Human mastadenovirus B
33330439	7402	Viruses	no rank	Human adenovirus 1	10533	129951	1996-05-20 01:00:00	dsDNA viruses, no RNA stage						Viruses	Adenoviridae	Mastadenovirus	Human mastadenovirus C
33465830	7626	Viruses	species	Human mastadenovirus C	129951	10509	2000-06-22 13:18:00	dsDNA viruses, no RNA stage						Viruses	Adenoviridae	Mastadenovirus
34223996	513	Viruses	no rank	Bovine adenovirus 4	70333	130499	1998-06-03 01:00:00	dsDNA viruses, no RNA stage						Viruses	Adenoviridae	Atadenovirus	Bovine adenovirus D
34303903	31301	Viruses	species	Bovine adenovirus D	130499	100953	2000-06-27 14:47:00	dsDNA viruses, no RNA stage						Viruses	Adenoviridae	Atadenovirus
38196041	31231	Viruses	no rank	Human adenovirus 35	10522	565303	1993-08-04 01:00:00	dsDNA viruses, no RNA stage	Human adenovirus B2					Viruses	Adenoviridae	Mastadenovirus	Human mastadenovirus B
40786870	31960	Viruses	no rank	Human adenovirus 7	10519	565302	1993-04-27 01:00:00	dsDNA viruses, no RNA stage	Human adenovirus B1					Viruses	Adenoviridae	Mastadenovirus	Human mastadenovirus B
41763965	21897	Viruses	no rank	Simian adenovirus 22	175569	130308	2004-02-10 18:02:40	dsDNA viruses, no RNA stage						Viruses	Adenoviridae	Mastadenovirus	Human mastadenovirus E
41764021	22459	Viruses	no rank	Simian adenovirus 23	35266	130308	1995-03-02	dsDNA viruses, no RNA stage						Viruses	Adenoviridae	Mastadenovirus	Human mastadenovirus E
41764064	21926	Viruses	no rank	Simian adenovirus 24	175568	130308	2004-02-10 18:02:40	dsDNA viruses, no RNA stage						Viruses	Adenoviridae	Mastadenovirus	Human mastadenovirus E
42416794	12341	Viruses	no rank	Human adenovirus 4	28280	130308	1993-04-28 01:00:00	dsDNA viruses, no RNA stage						Viruses	Adenoviridae	Mastadenovirus	Human mastadenovirus E
45504790	11286	Viruses	species	Human mastadenovirus E	130308	10509	2000-06-23 17:11:00	dsDNA viruses, no RNA stage						Viruses	Adenoviridae	Mastadenovirus
51173196	11352	Viruses	no rank	Human adenovirus 4	28280	130308	1993-04-28 01:00:00	dsDNA viruses, no RNA stage						Viruses	Adenoviridae	Mastadenovirus	Human mastadenovirus E
51173245	11286	Viruses	no rank	Human adenovirus 4	28280	130308	1993-04-28 01:00:00	dsDNA viruses, no RNA stage						Viruses	Adenoviridae	Mastadenovirus	Human mastadenovirus E
51173294	31836	Viruses	no rank	Human adenovirus 7	10519	565302	1993-04-27 01:00:00	dsDNA viruses, no RNA stage	Human adenovirus B1					Viruses	Adenoviridae	Mastadenovirus	Human mastadenovirus B
51518815	34246	Viruses	no rank	Simian adenovirus 3	38420	298334	1995-03-15 09:53:00	dsDNA viruses, no RNA stage						Viruses	Adenoviridae	Mastadenovirus	Simian mastadenovirus A
51527264	35994	Viruses	species	Human mastadenovirus E	130308	10509	2000-06-23 17:11:00	dsDNA viruses, no RNA stage						Viruses	Adenoviridae	Mastadenovirus
51702699	31354	Viruses	species	Human mastadenovirus B	108098	10509	1999-11-15 09:04:00	dsDNA viruses, no RNA stage						Viruses	Adenoviridae	Mastadenovirus
55847711	31707	Viruses	no rank	Human adenovirus 7	10519	565302	1993-04-27 01:00:00	dsDNA viruses, no RNA stage	Human adenovirus B1					Viruses	Adenoviridae	Mastadenovirus	Human mastadenovirus B
56237058	12166	Viruses	no rank	Human adenovirus 9	10527	130310	1993-04-28 01:00:00	dsDNA viruses, no RNA stage						Viruses	Adenoviridae	Mastadenovirus	Human mastadenovirus D
57115621	31628	Viruses	no rank	Human adenovirus 14	10521	565303	1996-05-20 01:00:00	dsDNA viruses, no RNA stage	Human adenovirus B2					Viruses	Adenoviridae	Mastadenovirus	Human mastadenovirus B
57115661	31207	Viruses	no rank	Human adenovirus 34	10548	565303	1993-04-28 01:00:00	dsDNA viruses, no RNA stage	Human adenovirus B2					Viruses	Adenoviridae	Mastadenovirus	Human mastadenovirus B
57115702	31865	Viruses	no rank	Human adenovirus 50	107462	108098	2001-01-16 12:26:00	dsDNA viruses, no RNA stage						Viruses	Adenoviridae	Mastadenovirus	Human mastadenovirus B
57115749	31790	Viruses	no rank	Human adenovirus 3	45659	565302	1996-02-07 14:30:00	dsDNA viruses, no RNA stage	Human adenovirus B1					Viruses	Adenoviridae	Mastadenovirus	Human mastadenovirus B
57115794	14760	Viruses	no rank	Human adenovirus 4	28280	130308	1993-04-28 01:00:00	dsDNA viruses, no RNA stage						Viruses	Adenoviridae	Mastadenovirus	Human mastadenovirus E
57115841	32032	Viruses	no rank	Human adenovirus 3	45659	565302	1996-02-07 14:30:00	dsDNA viruses, no RNA stage	Human adenovirus B1					Viruses	Adenoviridae	Mastadenovirus	Human mastadenovirus B
57115887	14480	Viruses	no rank	Human adenovirus 4	28280	130308	1993-04-28 01:00:00	dsDNA viruses, no RNA stage						Viruses	Adenoviridae	Mastadenovirus	Human mastadenovirus E
57115934	31858	Viruses	no rank	Human adenovirus 21	32608	565302	1994-03-08	dsDNA viruses, no RNA stage	Human adenovirus B1					Viruses	Adenoviridae	Mastadenovirus	Human mastadenovirus B
57115983	31678	Viruses	no rank	Human adenovirus 7	10519	565302	1993-04-27 01:00:00	dsDNA viruses, no RNA stage	Human adenovirus B1					Viruses	Adenoviridae	Mastadenovirus	Human mastadenovirus B
57116031	32003	Viruses	no rank	Human adenovirus 16	31544	565302	1994-03-08	dsDNA viruses, no RNA stage	Human adenovirus B1					Viruses	Adenoviridae	Mastadenovirus	Human mastadenovirus B
58177684	7623	Viruses	no rank	Human adenovirus 5	28285	129951	1993-04-27 01:00:00	dsDNA viruses, no RNA stage						Viruses	Adenoviridae	Mastadenovirus	Human mastadenovirus C
61602086	34450	Viruses	no rank	Simian adenovirus 1	310540	536079	2005-01-27 18:03:26	dsDNA viruses, no RNA stage						Viruses	Adenoviridae	Mastadenovirus	Human mastadenovirus G
62177315	13734	Viruses	no rank	Human adenovirus 46	46941	130310	1996-05-20 01:00:00	dsDNA viruses, no RNA stage						Viruses	Adenoviridae	Mastadenovirus	Human mastadenovirus D
88810171	14515	Viruses	no rank	Human adenovirus 49	218120	130310	2004-04-11 18:02:29	dsDNA viruses, no RNA stage						Viruses	Adenoviridae	Mastadenovirus	Human mastadenovirus D
93302091	31752	Viruses	species	Human mastadenovirus B	108098	10509	1999-11-15 09:04:00	dsDNA viruses, no RNA stage						Viruses	Adenoviridae	Mastadenovirus
93308305	31893	Viruses	species	Human mastadenovirus B	108098	10509	1999-11-15 09:04:00	dsDNA viruses, no RNA stage						Viruses	Adenoviridae	Mastadenovirus
117957257	13365	Viruses	no rank	Human adenovirus 37	52275	130310	1996-03-02	dsDNA viruses, no RNA stage						Viruses	Adenoviridae	Mastadenovirus	Human mastadenovirus D
124375632	5615	Viruses	no rank	Human adenovirus 52	332179	536079	2005-06-22 18:01:43	dsDNA viruses, no RNA stage						Viruses	Adenoviridae	Mastadenovirus	Human mastadenovirus G
124388819	12957	Viruses	no rank	Human adenovirus 64	1145295	130310	2012-02-11 18:01:05	dsDNA viruses, no RNA stage						Viruses	Adenoviridae	Mastadenovirus	Human mastadenovirus D
134105495	28791	Viruses	species	Human mastadenovirus B	108098	10509	1999-11-15 09:04:00	dsDNA viruses, no RNA stage						Viruses	Adenoviridae	Mastadenovirus
134141802	13745	Viruses	no rank	Human adenovirus 48	39641	130310	1995-04-24 14:26:00	dsDNA viruses, no RNA stage						Viruses	Adenoviridae	Mastadenovirus	Human mastadenovirus D
134141818	13941	Viruses	no rank	Human adenovirus 26	46928	130310	1996-05-20 01:00:00	dsDNA viruses, no RNA stage						Viruses	Adenoviridae	Mastadenovirus	Human mastadenovirus D
149395306	11289	Viruses	species	Human mastadenovirus E	130308	10509	2000-06-23 17:11:00	dsDNA viruses, no RNA stage						Viruses	Adenoviridae	Mastadenovirus
156071807	31290	Viruses	no rank	Human adenovirus 3+11p	459785	108098	2008-07-30 18:00:20	dsDNA viruses, no RNA stage						Viruses	Adenoviridae	Mastadenovirus	Human mastadenovirus B
156071808	31489	Viruses	no rank	Human adenovirus 3+11p	459785	108098	2008-07-30 18:00:20	dsDNA viruses, no RNA stage						Viruses	Adenoviridae	Mastadenovirus	Human mastadenovirus B
160700552	27751	Viruses	no rank	Snake adenovirus 1	189830	1146872	2002-03-26 18:01:00	dsDNA viruses, no RNA stage						Viruses	Adenoviridae	Atadenovirus	Snake adenovirus A
163869641	29576	Viruses	species	Ovine adenovirus D	130327	100953	2000-06-26 11:35:00	dsDNA viruses, no RNA stage						Viruses	Adenoviridae	Atadenovirus
190340974	35083	Viruses	species	Human mastadenovirus D	130310	10509	2000-06-23 17:34:00	dsDNA viruses, no RNA stage						Viruses	Adenoviridae	Mastadenovirus
197944726	35343	Viruses	species	Human mastadenovirus B	108098	10509	1999-11-15 09:04:00	dsDNA viruses, no RNA stage						Viruses	Adenoviridae	Mastadenovirus
197944766	34794	Viruses	species	Human mastadenovirus B	108098	10509	1999-11-15 09:04:00	dsDNA viruses, no RNA stage						Viruses	Adenoviridae	Mastadenovirus
199589312	25916	Viruses	no rank	Human adenovirus 41	10524	130309	1994-09-21 01:00:00	dsDNA viruses, no RNA stage						Viruses	Adenoviridae	Mastadenovirus	Human mastadenovirus F
205363480	14680	Viruses	species	Human mastadenovirus D	130310	10509	2000-06-23 17:34:00	dsDNA viruses, no RNA stage						Viruses	Adenoviridae	Mastadenovirus
218938484	12822	Viruses	no rank	Human adenovirus 22	46924	130310	1996-05-20 01:00:00	dsDNA viruses, no RNA stage						Viruses	Adenoviridae	Mastadenovirus	Human mastadenovirus D
219522346	36465	Viruses	no rank	Simian adenovirus 44	585078	129951	2009-07-10 18:00:37	dsDNA viruses, no RNA stage						Viruses	Adenoviridae	Mastadenovirus	Human mastadenovirus C
219522347	36844	Viruses	no rank	Simian adenovirus 43	585077	129951	2009-07-10 18:00:37	dsDNA viruses, no RNA stage						Viruses	Adenoviridae	Mastadenovirus	Human mastadenovirus C
219522348	36779	Viruses	no rank	Simian adenovirus 45	585079	129951	2009-07-10 18:00:37	dsDNA viruses, no RNA stage						Viruses	Adenoviridae	Mastadenovirus	Human mastadenovirus C
219522349	36605	Viruses	no rank	Simian adenovirus 42.2	585098	129951	2009-07-10 18:00:37	dsDNA viruses, no RNA stage						Viruses	Adenoviridae	Mastadenovirus	Human mastadenovirus C
219522350	36590	Viruses	no rank	Simian adenovirus 42.1	585097	129951	2009-07-10 18:00:37	dsDNA viruses, no RNA stage						Viruses	Adenoviridae	Mastadenovirus	Human mastadenovirus C
219522351	36613	Viruses	no rank	Simian adenovirus 31.2	585088	129951	2009-07-10 18:00:37	dsDNA viruses, no RNA stage						Viruses	Adenoviridae	Mastadenovirus	Human mastadenovirus C
219522352	36667	Viruses	no rank	Simian adenovirus 34	585068	129951	2009-07-10 18:00:37	dsDNA viruses, no RNA stage						Viruses	Adenoviridae	Mastadenovirus	Human mastadenovirus C
219522353	35939	Viruses	no rank	Simian adenovirus 31.1	585087	129951	2009-07-10 18:00:37	dsDNA viruses, no RNA stage						Viruses	Adenoviridae	Mastadenovirus	Human mastadenovirus C
219522354	36575	Viruses	no rank	Simian adenovirus 40.1	585093	129951	2009-07-10 18:00:37	dsDNA viruses, no RNA stage						Viruses	Adenoviridae	Mastadenovirus	Human mastadenovirus C
219522355	34228	Viruses	no rank	Simian adenovirus 33	585067	108098	2009-07-10 18:00:37	dsDNA viruses, no RNA stage						Viruses	Adenoviridae	Mastadenovirus	Human mastadenovirus B
219522356	34248	Viruses	no rank	Simian adenovirus 27.1	585083	108098	2009-07-10 18:00:37	dsDNA viruses, no RNA stage						Viruses	Adenoviridae	Mastadenovirus	Human mastadenovirus B
219522357	34739	Viruses	no rank	Simian adenovirus 35.2	585090	108098	2009-07-10 18:00:37	dsDNA viruses, no RNA stage						Viruses	Adenoviridae	Mastadenovirus	Human mastadenovirus B
219522358	33199	Viruses	no rank	Simian adenovirus 32	585066	108098	2009-07-10 18:00:37	dsDNA viruses, no RNA stage						Viruses	Adenoviridae	Mastadenovirus	Human mastadenovirus B
219522359	34785	Viruses	no rank	Simian adenovirus 35.1	585089	108098	2009-07-10 18:00:37	dsDNA viruses, no RNA stage						Viruses	Adenoviridae	Mastadenovirus	Human mastadenovirus B
219522360	33549	Viruses	no rank	Simian adenovirus 41.1	585095	108098	2009-07-10 18:00:37	dsDNA viruses, no RNA stage						Viruses	Adenoviridae	Mastadenovirus	Human mastadenovirus B
219522361	33682	Viruses	no rank	Simian adenovirus 28.1	585085	108098	2009-07-10 18:00:37	dsDNA viruses, no RNA stage						Viruses	Adenoviridae	Mastadenovirus	Human mastadenovirus B
219522362	33863	Viruses	no rank	Simian adenovirus 28.2	585086	108098	2009-07-10 18:00:37	dsDNA viruses, no RNA stage						Viruses	Adenoviridae	Mastadenovirus	Human mastadenovirus B
219522363	33828	Viruses	no rank	Simian adenovirus 29	585063	108098	2009-07-10 18:00:37	dsDNA viruses, no RNA stage						Viruses	Adenoviridae	Mastadenovirus	Human mastadenovirus B
219522364	20152	Viruses	no rank	Simian adenovirus 36	585070	130308	2009-07-10 18:00:37	dsDNA viruses, no RNA stage						Viruses	Adenoviridae	Mastadenovirus	Human mastadenovirus E
219522365	20587	Viruses	no rank	Simian adenovirus 25.2	585082	175567	2009-07-04 18:00:36	dsDNA viruses, no RNA stage	Simian adenovirus 25					Viruses	Adenoviridae	Mastadenovirus	Human mastadenovirus E
219522366	18821	Viruses	no rank	Simian adenovirus 37.2	585092	585071	2009-07-10 18:00:37	dsDNA viruses, no RNA stage	Simian adenovirus 37					Viruses	Adenoviridae	Mastadenovirus	Human mastadenovirus E
219522367	17550	Viruses	no rank	Simian adenovirus 30	585064	130308	2009-07-04 18:00:36	dsDNA viruses, no RNA stage						Viruses	Adenoviridae	Mastadenovirus	Human mastadenovirus E
219522368	18797	Viruses	no rank	Simian adenovirus 37.1	585091	585071	2009-07-10 18:00:37	dsDNA viruses, no RNA stage	Simian adenovirus 37					Viruses	Adenoviridae	Mastadenovirus	Human mastadenovirus E
219522369	21965	Viruses	no rank	Simian adenovirus 38	585072	130308	2009-07-04 18:00:36	dsDNA viruses, no RNA stage						Viruses	Adenoviridae	Mastadenovirus	Human mastadenovirus E
219522370	13092	Viruses	no rank	Simian adenovirus 26	585060	130308	2009-07-04 18:00:36	dsDNA viruses, no RNA stage						Viruses	Adenoviridae	Mastadenovirus	Human mastadenovirus E
219522371	18634	Viruses	no rank	Simian adenovirus 39	585073	130308	2009-07-04 18:00:36	dsDNA viruses, no RNA stage						Viruses	Adenoviridae	Mastadenovirus	Human mastadenovirus E
219522372	36605	Viruses	no rank	Simian adenovirus 42.3	585099	129951	2009-07-10 18:00:37	dsDNA viruses, no RNA stage						Viruses	Adenoviridae	Mastadenovirus	Human mastadenovirus C
219522373	36607	Viruses	no rank	Simian adenovirus 40.2	585094	129951	2009-07-10 18:00:37	dsDNA viruses, no RNA stage						Viruses	Adenoviridae	Mastadenovirus	Human mastadenovirus C
219522374	33938	Viruses	no rank	Simian adenovirus 41.2	585096	108098	2009-07-10 18:00:37	dsDNA viruses, no RNA stage						Viruses	Adenoviridae	Mastadenovirus	Human mastadenovirus B
219522375	33853	Viruses	no rank	Simian adenovirus 27.2	585084	108098	2009-07-10 18:00:37	dsDNA viruses, no RNA stage						Viruses	Adenoviridae	Mastadenovirus	Human mastadenovirus B
219522376	33819	Viruses	no rank	Simian adenovirus 47	585081	108098	2009-07-10 18:00:37	dsDNA viruses, no RNA stage						Viruses	Adenoviridae	Mastadenovirus	Human mastadenovirus B
219522377	33677	Viruses	no rank	Simian adenovirus 46	585080	108098	2009-07-10 18:00:37	dsDNA viruses, no RNA stage						Viruses	Adenoviridae	Mastadenovirus	Human mastadenovirus B
222143573	13001	Viruses	no rank	Human adenovirus 8	31545	130310	1996-05-20 01:00:00	dsDNA viruses, no RNA stage						Viruses	Adenoviridae	Mastadenovirus	Human mastadenovirus D
222143610	12439	Viruses	no rank	Human adenovirus 8	31545	130310	1996-05-20 01:00:00	dsDNA viruses, no RNA stage						Viruses	Adenoviridae	Mastadenovirus	Human mastadenovirus D
222143647	12675	Viruses	no rank	Human adenovirus 8	31545	130310	1996-05-20 01:00:00	dsDNA viruses, no RNA stage						Viruses	Adenoviridae	Mastadenovirus	Human mastadenovirus D
222143721	12814	Viruses	no rank	Human adenovirus 19	28278	130310	1993-04-28 01:00:00	dsDNA viruses, no RNA stage						Viruses	Adenoviridae	Mastadenovirus	Human mastadenovirus D
222143758	13023	Viruses	no rank	Human adenovirus 19	28278	130310	1993-04-28 01:00:00	dsDNA viruses, no RNA stage						Viruses	Adenoviridae	Mastadenovirus	Human mastadenovirus D
222143795	13023	Viruses	no rank	Human adenovirus 19	28278	130310	1993-04-28 01:00:00	dsDNA viruses, no RNA stage						Viruses	Adenoviridae	Mastadenovirus	Human mastadenovirus D
222143832	13023	Viruses	no rank	Human adenovirus 19	28278	130310	1993-04-28 01:00:00	dsDNA viruses, no RNA stage						Viruses	Adenoviridae	Mastadenovirus	Human mastadenovirus D
222143869	13209	Viruses	no rank	Human adenovirus 37	52275	130310	1996-03-02	dsDNA viruses, no RNA stage						Viruses	Adenoviridae	Mastadenovirus	Human mastadenovirus D
222143906	13362	Viruses	no rank	Human adenovirus 37	52275	130310	1996-03-02	dsDNA viruses, no RNA stage						Viruses	Adenoviridae	Mastadenovirus	Human mastadenovirus D
222143943	13521	Viruses	no rank	Human adenovirus 37	52275	130310	1996-03-02	dsDNA viruses, no RNA stage						Viruses	Adenoviridae	Mastadenovirus	Human mastadenovirus D
222143980	12711	Viruses	no rank	Human adenovirus 37	52275	130310	1996-03-02	dsDNA viruses, no RNA stage						Viruses	Adenoviridae	Mastadenovirus	Human mastadenovirus D
225350456	2948	Viruses	no rank	Human adenovirus 6	10534	129951	1996-05-20 01:00:00	dsDNA viruses, no RNA stage						Viruses	Adenoviridae	Mastadenovirus	Human mastadenovirus C
226726394	31672	Viruses	no rank	Human adenovirus 14	10521	565303	1996-05-20 01:00:00	dsDNA viruses, no RNA stage	Human adenovirus B2					Viruses	Adenoviridae	Mastadenovirus	Human mastadenovirus B
227122414	30570	Viruses	no rank	Murine adenovirus 3	573199	696859	2009-04-21 18:00:35	dsDNA viruses, no RNA stage						Viruses	Adenoviridae	Mastadenovirus	Murine mastadenovirus C
233770158	14896	Viruses	no rank	Human adenovirus 28	46930	130310	1996-05-20 01:00:00	dsDNA viruses, no RNA stage						Viruses	Adenoviridae	Mastadenovirus	Human mastadenovirus D
238915414	13445	Viruses	no rank	Human adenovirus 22	46924	130310	1996-05-20 01:00:00	dsDNA viruses, no RNA stage						Viruses	Adenoviridae	Mastadenovirus	Human mastadenovirus D
253761974	34920	Viruses	no rank	Human adenovirus 54	651580	130310	2009-06-12 18:00:34	dsDNA viruses, no RNA stage						Viruses	Adenoviridae	Mastadenovirus	Human mastadenovirus D
255958147	11473	Viruses	no rank	Human adenovirus 54	651580	130310	2009-06-12 18:00:34	dsDNA viruses, no RNA stage						Viruses	Adenoviridae	Mastadenovirus	Human mastadenovirus D
256028986	31651	Viruses	no rank	Human adenovirus 55	714978	565303	2010-01-30 18:00:36	dsDNA viruses, no RNA stage	Human adenovirus B2					Viruses	Adenoviridae	Mastadenovirus	Human mastadenovirus B
257122613	31470	Viruses	no rank	Human adenovirus 11a	343463	10541	1994-09-22 01:00:00	dsDNA viruses, no RNA stage	Human adenovirus B2	Human adenovirus 11				Viruses	Adenoviridae	Mastadenovirus	Human mastadenovirus B
260175491	31828	Viruses	no rank	Human adenovirus 7	10519	565302	1993-04-27 01:00:00	dsDNA viruses, no RNA stage	Human adenovirus B1					Viruses	Adenoviridae	Mastadenovirus	Human mastadenovirus B
261875889	14142	Viruses	no rank	Human adenovirus 36	46936	130310	1996-05-20 01:00:00	dsDNA viruses, no RNA stage						Viruses	Adenoviridae	Mastadenovirus	Human mastadenovirus D
269990916	31336	Viruses	no rank	Human adenovirus 31	10529	129875	1993-04-28 01:00:00	dsDNA viruses, no RNA stage						Viruses	Adenoviridae	Mastadenovirus	Human mastadenovirus A
270567218	31985	Viruses	no rank	Human adenovirus 18	10528	129875	1993-04-28 01:00:00	dsDNA viruses, no RNA stage						Viruses	Adenoviridae	Mastadenovirus	Human mastadenovirus A
304633245	4035	Viruses	species	Human mastadenovirus C	129951	10509	2000-06-22 13:18:00	dsDNA viruses, no RNA stage						Viruses	Adenoviridae	Mastadenovirus
308152910	15207	Viruses	no rank	Human adenovirus 15	28276	130310	1996-05-20 01:00:00	dsDNA viruses, no RNA stage						Viruses	Adenoviridae	Mastadenovirus	Human mastadenovirus D
308152947	14632	Viruses	no rank	Human adenovirus 29	46931	130310	1996-05-20 01:00:00	dsDNA viruses, no RNA stage						Viruses	Adenoviridae	Mastadenovirus	Human mastadenovirus D
308152983	12016	Viruses	species	Human mastadenovirus D	130310	10509	2000-06-23 17:34:00	dsDNA viruses, no RNA stage						Viruses	Adenoviridae	Mastadenovirus
308207253	12197	Viruses	no rank	Human adenovirus 56	880565	377622	2010-09-07 18:00:46	dsDNA viruses, no RNA stage	unclassified Human adenovirus D					Viruses	Adenoviridae	Mastadenovirus	Human mastadenovirus D
312176476	102	Viruses	species	Fowl aviadenovirus C	190063	10552	2002-03-20 18:19:00	dsDNA viruses, no RNA stage						Viruses	Adenoviridae	Aviadenovirus
315258818	14086	Viruses	species	Human mastadenovirus D	130310	10509	2000-06-23 17:34:00	dsDNA viruses, no RNA stage						Viruses	Adenoviridae	Mastadenovirus
315258855	13227	Viruses	species	Human mastadenovirus D	130310	10509	2000-06-23 17:34:00	dsDNA viruses, no RNA stage						Viruses	Adenoviridae	Mastadenovirus
315258891	13194	Viruses	species	Human mastadenovirus D	130310	10509	2000-06-23 17:34:00	dsDNA viruses, no RNA stage						Viruses	Adenoviridae	Mastadenovirus
315258927	13915	Viruses	no rank	Human adenovirus 53	556926	130310	2008-09-27 18:00:31	dsDNA viruses, no RNA stage						Viruses	Adenoviridae	Mastadenovirus	Human mastadenovirus D
315258963	13761	Viruses	no rank	Human adenovirus 53	556926	130310	2008-09-27 18:00:31	dsDNA viruses, no RNA stage						Viruses	Adenoviridae	Mastadenovirus	Human mastadenovirus D
315259000	13931	Viruses	no rank	Human adenovirus 53	556926	130310	2008-09-27 18:00:31	dsDNA viruses, no RNA stage						Viruses	Adenoviridae	Mastadenovirus	Human mastadenovirus D
315259037	13931	Viruses	no rank	Human adenovirus 53	556926	130310	2008-09-27 18:00:31	dsDNA viruses, no RNA stage						Viruses	Adenoviridae	Mastadenovirus	Human mastadenovirus D
317140354	2950	Viruses	no rank	Human adenovirus 6	10534	129951	1996-05-20 01:00:00	dsDNA viruses, no RNA stage						Viruses	Adenoviridae	Mastadenovirus	Human mastadenovirus C
318065965	35203	Viruses	no rank	Murine adenovirus 2	931972	1146873	2011-01-02 18:00:58	dsDNA viruses, no RNA stage						Viruses	Adenoviridae	Mastadenovirus	Murine mastadenovirus B
320202734	44055	Viruses	species	Fowl aviadenovirus E	190065	10552	2002-03-19 18:01:00	dsDNA viruses, no RNA stage						Viruses	Adenoviridae	Aviadenovirus
324105303	14288	Viruses	no rank	Human adenovirus 17	46922	130310	1996-05-20 01:00:00	dsDNA viruses, no RNA stage						Viruses	Adenoviridae	Mastadenovirus	Human mastadenovirus D
325659061	1884	Viruses	no rank	Simian adenovirus 50	995023	1165908	2011-03-15 18:00:31	dsDNA viruses, no RNA stage	unclassified Simian adenoviruses					Viruses	Adenoviridae	Mastadenovirus	Simian adenovirus B
327409465	45667	Viruses	species	Fowl aviadenovirus C	190063	10552	2002-03-20 18:19:00	dsDNA viruses, no RNA stage						Viruses	Adenoviridae	Aviadenovirus
327415370	35499	Viruses	no rank	Simian adenovirus 49	995022	1165908	2011-03-15 18:00:31	dsDNA viruses, no RNA stage	unclassified Simian adenoviruses					Viruses	Adenoviridae	Mastadenovirus	Simian adenovirus B
330368803	29137	Viruses	no rank	Human adenovirus 7	10519	565302	1993-04-27 01:00:00	dsDNA viruses, no RNA stage	Human adenovirus B1					Viruses	Adenoviridae	Mastadenovirus	Human mastadenovirus B
331271175	26284	Viruses	no rank	Raptor adenovirus 1	1520002	691961	2014-07-14 13:01:58	dsDNA viruses, no RNA stage						Viruses	Adenoviridae	Siadenovirus	Raptor siadenovirus A
335315321	25935	Viruses	no rank	Human adenovirus 41	10524	130309	1994-09-21 01:00:00	dsDNA viruses, no RNA stage						Viruses	Adenoviridae	Mastadenovirus	Human mastadenovirus F
341573861	31210	Viruses	no rank	Human adenovirus 61	1069441	129875	2011-07-26 18:00:47	dsDNA viruses, no RNA stage						Viruses	Adenoviridae	Mastadenovirus	Human mastadenovirus A
341818644	14330	Viruses	species	Human mastadenovirus D	130310	10509	2000-06-23 17:34:00	dsDNA viruses, no RNA stage						Viruses	Adenoviridae	Mastadenovirus
342898882	15387	Viruses	no rank	Human adenovirus 62	1091197	130310	2011-10-02 18:00:53	dsDNA viruses, no RNA stage						Viruses	Adenoviridae	Mastadenovirus	Human mastadenovirus D
342898919	14433	Viruses	no rank	Human adenovirus 60a	1091198	130310	2011-10-02 18:00:53	dsDNA viruses, no RNA stage						Viruses	Adenoviridae	Mastadenovirus	Human mastadenovirus D
345462093	31616	Viruses	no rank	Bat adenovirus 2	696069	1146874	2009-12-05 18:00:40	dsDNA viruses, no RNA stage						Viruses	Adenoviridae	Mastadenovirus	Bat mastadenovirus B
357640515	31734	Viruses	no rank	Human adenovirus 66	1337398	377612	2013-06-03 13:01:29	dsDNA viruses, no RNA stage	unclassified Human adenovirus B					Viruses	Adenoviridae	Mastadenovirus	Human mastadenovirus B
357640557	31728	Viruses	no rank	Human adenovirus 7d2	326124	10519	2005-05-02 18:03:56	dsDNA viruses, no RNA stage	Human adenovirus B1	Human adenovirus 7				Viruses	Adenoviridae	Mastadenovirus	Human mastadenovirus B
357640599	32791	Viruses	no rank	Human adenovirus 68	1096763	565302	2011-12-20 18:01:05	dsDNA viruses, no RNA stage	Human adenovirus B1					Viruses	Adenoviridae	Mastadenovirus	Human mastadenovirus B
357640641	31683	Viruses	no rank	Human adenovirus 3+7	260047	108098	2004-04-02 18:02:36	dsDNA viruses, no RNA stage						Viruses	Adenoviridae	Mastadenovirus	Human mastadenovirus B
357640683	31924	Viruses	no rank	Human adenovirus 16	31544	565302	1994-03-08	dsDNA viruses, no RNA stage	Human adenovirus B1					Viruses	Adenoviridae	Mastadenovirus	Human mastadenovirus B
363540913	26340	Viruses	no rank	Skua adenovirus 1	1520004	886980	2014-07-14 13:01:58	dsDNA viruses, no RNA stage						Viruses	Adenoviridae	Siadenovirus	Skua siadenovirus A
363987165	13788	Viruses	no rank	Human adenovirus 65	1094363	130310	2011-12-20 18:01:05	dsDNA viruses, no RNA stage						Viruses	Adenoviridae	Mastadenovirus	Human mastadenovirus D
365775793	4805	Viruses	no rank	Bovine adenovirus 3	10510	129950	1994-04-29 01:00:00	dsDNA viruses, no RNA stage						Viruses	Adenoviridae	Mastadenovirus	Bovine mastadenovirus B
365824246	45413	Viruses	no rank	Turkey adenovirus 1	878329	1146875	2010-09-06 18:00:44	dsDNA viruses, no RNA stage						Viruses	Adenoviridae	Aviadenovirus	Turkey aviadenovirus B
375300321	12957	Viruses	no rank	Human adenovirus 64	1145295	130310	2012-02-11 18:01:05	dsDNA viruses, no RNA stage						Viruses	Adenoviridae	Mastadenovirus	Human mastadenovirus D
375300360	13051	Viruses	no rank	Human adenovirus 64	1145295	130310	2012-02-11 18:01:05	dsDNA viruses, no RNA stage						Viruses	Adenoviridae	Mastadenovirus	Human mastadenovirus D
375300399	12688	Viruses	no rank	Human adenovirus 64	1145295	130310	2012-02-11 18:01:05	dsDNA viruses, no RNA stage						Viruses	Adenoviridae	Mastadenovirus	Human mastadenovirus D
375300438	13623	Viruses	no rank	Human adenovirus 19	28278	130310	1993-04-28 01:00:00	dsDNA viruses, no RNA stage						Viruses	Adenoviridae	Mastadenovirus	Human mastadenovirus D
378554412	31681	Viruses	no rank	Bat adenovirus TJM	727977	1146877	2010-03-06 18:00:45	dsDNA viruses, no RNA stage						Viruses	Adenoviridae	Mastadenovirus	Bat mastadenovirus A
378786191	15735	Viruses	no rank	Human adenovirus 67	1101371	130310	2012-02-29 18:00:53	dsDNA viruses, no RNA stage						Viruses	Adenoviridae	Mastadenovirus	Human mastadenovirus D
379977028	7973	Viruses	no rank	Simian adenovirus A1139	1159186	1165908	2012-03-22 18:00:54	dsDNA viruses, no RNA stage	unclassified Simian adenoviruses					Viruses	Adenoviridae	Mastadenovirus	Simian adenovirus B
379977061	8299	Viruses	no rank	Simian adenovirus A1163	1159187	1165908	2012-03-22 18:00:54	dsDNA viruses, no RNA stage	unclassified Simian adenoviruses					Viruses	Adenoviridae	Mastadenovirus	Simian adenovirus B
379977093	26610	Viruses	no rank	Simian adenovirus A1173	1159188	1165908	2012-03-22 18:00:54	dsDNA viruses, no RNA stage	unclassified Simian adenoviruses					Viruses	Adenoviridae	Mastadenovirus	Simian adenovirus B
379977128	26363	Viruses	no rank	Simian adenovirus A1258	1159189	1165908	2012-03-22 18:00:54	dsDNA viruses, no RNA stage	unclassified Simian adenoviruses					Viruses	Adenoviridae	Mastadenovirus	Simian adenovirus B
379977161	26607	Viruses	no rank	Simian adenovirus A1285	1159190	1165908	2012-03-22 18:00:54	dsDNA viruses, no RNA stage	unclassified Simian adenoviruses					Viruses	Adenoviridae	Mastadenovirus	Simian adenovirus B
379977195	9398	Viruses	no rank	Simian adenovirus A1296	1159191	1165908	2012-03-22 18:00:54	dsDNA viruses, no RNA stage	unclassified Simian adenoviruses					Viruses	Adenoviridae	Mastadenovirus	Simian adenovirus B
379977228	8945	Viruses	no rank	Simian adenovirus A1312	1159192	1165908	2012-03-22 18:00:54	dsDNA viruses, no RNA stage	unclassified Simian adenoviruses					Viruses	Adenoviridae	Mastadenovirus	Simian adenovirus B
379977262	6340	Viruses	no rank	Simian adenovirus A1327	1159193	1165908	2012-03-22 18:00:54	dsDNA viruses, no RNA stage	unclassified Simian adenoviruses					Viruses	Adenoviridae	Mastadenovirus	Simian adenovirus B
379977295	8148	Viruses	no rank	Simian adenovirus A1335	1159194	1165908	2012-03-22 18:00:54	dsDNA viruses, no RNA stage	unclassified Simian adenoviruses					Viruses	Adenoviridae	Mastadenovirus	Simian adenovirus B
381214017	940	Viruses	species	Fowl aviadenovirus C	190063	10552	2002-03-20 18:19:00	dsDNA viruses, no RNA stage						Viruses	Adenoviridae	Aviadenovirus
381283770	13382	Viruses	no rank	Simian adenovirus 6	413259	298334	1995-03-15 09:58:00	dsDNA viruses, no RNA stage						Viruses	Adenoviridae	Mastadenovirus	Simian mastadenovirus A
384038916	31738	Viruses	no rank	Human adenovirus 14	10521	565303	1996-05-20 01:00:00	dsDNA viruses, no RNA stage	Human adenovirus B2					Viruses	Adenoviridae	Mastadenovirus	Human mastadenovirus B
384628577	31841	Viruses	no rank	Human adenovirus 7	10519	565302	1993-04-27 01:00:00	dsDNA viruses, no RNA stage	Human adenovirus B1					Viruses	Adenoviridae	Mastadenovirus	Human mastadenovirus B
386522683	36711	Viruses	no rank	Chimpanzee adenovirus Y25	1123958	130308	2011-12-25 18:01:07	dsDNA viruses, no RNA stage						Viruses	Adenoviridae	Mastadenovirus	Human mastadenovirus E
388570674	43376	Viruses	no rank	Goose adenovirus 4	1193422	1193420	2012-05-24 18:00:39	dsDNA viruses, no RNA stage						Viruses	Adenoviridae	Aviadenovirus	Goose aviadenovirus A
401022295	31536	Viruses	no rank	Human adenovirus 55	714978	565303	2010-01-30 18:00:36	dsDNA viruses, no RNA stage	Human adenovirus B2					Viruses	Adenoviridae	Mastadenovirus	Human mastadenovirus B
401022332	31660	Viruses	no rank	Human adenovirus 55	714978	565303	2010-01-30 18:00:36	dsDNA viruses, no RNA stage	Human adenovirus B2					Viruses	Adenoviridae	Mastadenovirus	Human mastadenovirus B
401022369	31545	Viruses	no rank	Human adenovirus 55	714978	565303	2010-01-30 18:00:36	dsDNA viruses, no RNA stage	Human adenovirus B2					Viruses	Adenoviridae	Mastadenovirus	Human mastadenovirus B
402173168	31878	Viruses	species	Human mastadenovirus B	108098	10509	1999-11-15 09:04:00	dsDNA viruses, no RNA stage						Viruses	Adenoviridae	Mastadenovirus
402173208	31837	Viruses	species	Human mastadenovirus B	108098	10509	1999-11-15 09:04:00	dsDNA viruses, no RNA stage						Viruses	Adenoviridae	Mastadenovirus
402173248	31832	Viruses	species	Human mastadenovirus B	108098	10509	1999-11-15 09:04:00	dsDNA viruses, no RNA stage						Viruses	Adenoviridae	Mastadenovirus
402173288	31704	Viruses	species	Human mastadenovirus B	108098	10509	1999-11-15 09:04:00	dsDNA viruses, no RNA stage						Viruses	Adenoviridae	Mastadenovirus
402173329	31665	Viruses	species	Human mastadenovirus B	108098	10509	1999-11-15 09:04:00	dsDNA viruses, no RNA stage						Viruses	Adenoviridae	Mastadenovirus
402173369	31485	Viruses	species	Human mastadenovirus B	108098	10509	1999-11-15 09:04:00	dsDNA viruses, no RNA stage						Viruses	Adenoviridae	Mastadenovirus
402173409	31144	Viruses	species	Human mastadenovirus B	108098	10509	1999-11-15 09:04:00	dsDNA viruses, no RNA stage						Viruses	Adenoviridae	Mastadenovirus
402173449	31724	Viruses	species	Human mastadenovirus B	108098	10509	1999-11-15 09:04:00	dsDNA viruses, no RNA stage						Viruses	Adenoviridae	Mastadenovirus
402173490	31675	Viruses	species	Human mastadenovirus B	108098	10509	1999-11-15 09:04:00	dsDNA viruses, no RNA stage						Viruses	Adenoviridae	Mastadenovirus
402173531	3125	Viruses	species	Human mastadenovirus C	129951	10509	2000-06-22 13:18:00	dsDNA viruses, no RNA stage						Viruses	Adenoviridae	Mastadenovirus
406678922	7420	Viruses	species	Human mastadenovirus C	129951	10509	2000-06-22 13:18:00	dsDNA viruses, no RNA stage						Viruses	Adenoviridae	Mastadenovirus
406679016	4740	Viruses	species	Human mastadenovirus C	129951	10509	2000-06-22 13:18:00	dsDNA viruses, no RNA stage						Viruses	Adenoviridae	Mastadenovirus
406679061	419	Viruses	species	Human mastadenovirus C	129951	10509	2000-06-22 13:18:00	dsDNA viruses, no RNA stage						Viruses	Adenoviridae	Mastadenovirus
406679107	7293	Viruses	species	Human mastadenovirus C	129951	10509	2000-06-22 13:18:00	dsDNA viruses, no RNA stage						Viruses	Adenoviridae	Mastadenovirus
406679152	7281	Viruses	species	Human mastadenovirus C	129951	10509	2000-06-22 13:18:00	dsDNA viruses, no RNA stage						Viruses	Adenoviridae	Mastadenovirus
406679199	100	Viruses	species	Human mastadenovirus C	129951	10509	2000-06-22 13:18:00	dsDNA viruses, no RNA stage						Viruses	Adenoviridae	Mastadenovirus
406679245	7283	Viruses	species	Human mastadenovirus C	129951	10509	2000-06-22 13:18:00	dsDNA viruses, no RNA stage						Viruses	Adenoviridae	Mastadenovirus
406679291	7289	Viruses	species	Human mastadenovirus C	129951	10509	2000-06-22 13:18:00	dsDNA viruses, no RNA stage						Viruses	Adenoviridae	Mastadenovirus
409974355	31669	Viruses	species	Human mastadenovirus B	108098	10509	1999-11-15 09:04:00	dsDNA viruses, no RNA stage						Viruses	Adenoviridae	Mastadenovirus
410994801	31852	Viruses	no rank	Human adenovirus 7	10519	565302	1993-04-27 01:00:00	dsDNA viruses, no RNA stage	Human adenovirus B1					Viruses	Adenoviridae	Mastadenovirus	Human mastadenovirus B
440382961	30024	Viruses	no rank	Bovine adenovirus 6	111167	130500	1999-12-30	dsDNA viruses, no RNA stage	unclassified Atadenovirus					Viruses	Adenoviridae	Atadenovirus	Bovine adenovirus E
451352781	13863	Viruses	no rank	Human adenovirus 43	46938	130310	1996-05-20 01:00:00	dsDNA viruses, no RNA stage						Viruses	Adenoviridae	Mastadenovirus	Human mastadenovirus D
451963838	31686	Viruses	no rank	Human adenovirus 14	10521	565303	1996-05-20 01:00:00	dsDNA viruses, no RNA stage	Human adenovirus B2					Viruses	Adenoviridae	Mastadenovirus	Human mastadenovirus B
460042637	34302	Viruses	species	Simian adenovirus 20	585059	413684	2009-07-10 18:00:37	dsDNA viruses, no RNA stage	unclassified Simian adenoviruses					Viruses	Adenoviridae	Mastadenovirus
482665707	7523	Viruses	species	Simian adenovirus B	1165908	413684	2012-03-22 18:00:54	dsDNA viruses, no RNA stage	unclassified Simian adenoviruses					Viruses	Adenoviridae	Mastadenovirus
482665779	9359	Viruses	species	Simian adenovirus C	1324794	413684	2013-04-30 01:01:25	dsDNA viruses, no RNA stage	unclassified Simian adenoviruses					Viruses	Adenoviridae	Mastadenovirus
485191057	34391	Viruses	species	Simian adenovirus C	1324794	413684	2013-04-30 01:01:25	dsDNA viruses, no RNA stage	unclassified Simian adenoviruses					Viruses	Adenoviridae	Mastadenovirus
496838689	36838	Viruses	species	Titi monkey adenovirus ECC-2011	994672	189831	2011-07-22 18:00:48	dsDNA viruses, no RNA stage	unclassified Adenoviridae					Viruses	Adenoviridae
501000341	45781	Viruses	no rank	Fowl adenovirus 5	172861	190062	2001-10-12 19:01:00	dsDNA viruses, no RNA stage						Viruses	Adenoviridae	Aviadenovirus	Fowl aviadenovirus B
530801662	14466	Viruses	no rank	Human adenovirus 4	28280	130308	1993-04-28 01:00:00	dsDNA viruses, no RNA stage						Viruses	Adenoviridae	Mastadenovirus	Human mastadenovirus E
532127457	31697	Viruses	species	Human mastadenovirus B	108098	10509	1999-11-15 09:04:00	dsDNA viruses, no RNA stage						Viruses	Adenoviridae	Mastadenovirus
532127502	12701	Viruses	species	Human mastadenovirus D	130310	10509	2000-06-23 17:34:00	dsDNA viruses, no RNA stage						Viruses	Adenoviridae	Mastadenovirus
532127546	31275	Viruses	species	Human mastadenovirus A	129875	10509	2000-06-21 14:42:00	dsDNA viruses, no RNA stage						Viruses	Adenoviridae	Mastadenovirus
532127583	31823	Viruses	species	Human mastadenovirus B	108098	10509	1999-11-15 09:04:00	dsDNA viruses, no RNA stage						Viruses	Adenoviridae	Mastadenovirus
532127626	31432	Viruses	species	Human mastadenovirus B	108098	10509	1999-11-15 09:04:00	dsDNA viruses, no RNA stage						Viruses	Adenoviridae	Mastadenovirus
532127668	14505	Viruses	species	Human mastadenovirus D	130310	10509	2000-06-23 17:34:00	dsDNA viruses, no RNA stage						Viruses	Adenoviridae	Mastadenovirus
532127714	31852	Viruses	species	Human mastadenovirus B	108098	10509	1999-11-15 09:04:00	dsDNA viruses, no RNA stage						Viruses	Adenoviridae	Mastadenovirus
532127757	29372	Viruses	species	Human mastadenovirus B	108098	10509	1999-11-15 09:04:00	dsDNA viruses, no RNA stage						Viruses	Adenoviridae	Mastadenovirus
532127799	31692	Viruses	species	Human mastadenovirus B	108098	10509	1999-11-15 09:04:00	dsDNA viruses, no RNA stage						Viruses	Adenoviridae	Mastadenovirus
532127845	31702	Viruses	species	Human mastadenovirus B	108098	10509	1999-11-15 09:04:00	dsDNA viruses, no RNA stage						Viruses	Adenoviridae	Mastadenovirus
532127889	7623	Viruses	species	Human mastadenovirus C	129951	10509	2000-06-22 13:18:00	dsDNA viruses, no RNA stage						Viruses	Adenoviridae	Mastadenovirus
532127936	31703	Viruses	species	Human mastadenovirus B	108098	10509	1999-11-15 09:04:00	dsDNA viruses, no RNA stage						Viruses	Adenoviridae	Mastadenovirus
532127979	6229	Viruses	species	Human mastadenovirus C	129951	10509	2000-06-22 13:18:00	dsDNA viruses, no RNA stage						Viruses	Adenoviridae	Mastadenovirus
532128070	32043	Viruses	species	Human mastadenovirus B	108098	10509	1999-11-15 09:04:00	dsDNA viruses, no RNA stage						Viruses	Adenoviridae	Mastadenovirus
532128113	31689	Viruses	species	Human mastadenovirus B	108098	10509	1999-11-15 09:04:00	dsDNA viruses, no RNA stage						Viruses	Adenoviridae	Mastadenovirus
532128156	31834	Viruses	species	Human mastadenovirus B	108098	10509	1999-11-15 09:04:00	dsDNA viruses, no RNA stage						Viruses	Adenoviridae	Mastadenovirus
532128199	31771	Viruses	species	Human mastadenovirus B	108098	10509	1999-11-15 09:04:00	dsDNA viruses, no RNA stage						Viruses	Adenoviridae	Mastadenovirus
532128245	31705	Viruses	species	Human mastadenovirus B	108098	10509	1999-11-15 09:04:00	dsDNA viruses, no RNA stage						Viruses	Adenoviridae	Mastadenovirus
532128330	31072	Viruses	species	Human mastadenovirus B	108098	10509	1999-11-15 09:04:00	dsDNA viruses, no RNA stage						Viruses	Adenoviridae	Mastadenovirus
532128372	13870	Viruses	species	Human mastadenovirus D	130310	10509	2000-06-23 17:34:00	dsDNA viruses, no RNA stage						Viruses	Adenoviridae	Mastadenovirus
532128418	13032	Viruses	species	Human mastadenovirus D	130310	10509	2000-06-23 17:34:00	dsDNA viruses, no RNA stage						Viruses	Adenoviridae	Mastadenovirus
532128462	7552	Viruses	species	Human mastadenovirus C	129951	10509	2000-06-22 13:18:00	dsDNA viruses, no RNA stage						Viruses	Adenoviridae	Mastadenovirus
532128550	12467	Viruses	species	Human mastadenovirus D	130310	10509	2000-06-23 17:34:00	dsDNA viruses, no RNA stage						Viruses	Adenoviridae	Mastadenovirus
532128595	31730	Viruses	species	Human mastadenovirus B	108098	10509	1999-11-15 09:04:00	dsDNA viruses, no RNA stage						Viruses	Adenoviridae	Mastadenovirus
532128638	13463	Viruses	species	Human mastadenovirus D	130310	10509	2000-06-23 17:34:00	dsDNA viruses, no RNA stage						Viruses	Adenoviridae	Mastadenovirus
532128730	12689	Viruses	species	Human mastadenovirus D	130310	10509	2000-06-23 17:34:00	dsDNA viruses, no RNA stage						Viruses	Adenoviridae	Mastadenovirus
532128775	13843	Viruses	species	Human mastadenovirus D	130310	10509	2000-06-23 17:34:00	dsDNA viruses, no RNA stage						Viruses	Adenoviridae	Mastadenovirus
532128821	14847	Viruses	species	Human mastadenovirus D	130310	10509	2000-06-23 17:34:00	dsDNA viruses, no RNA stage						Viruses	Adenoviridae	Mastadenovirus
532128867	14927	Viruses	species	Human mastadenovirus D	130310	10509	2000-06-23 17:34:00	dsDNA viruses, no RNA stage						Viruses	Adenoviridae	Mastadenovirus
532128914	12008	Viruses	species	Human mastadenovirus D	130310	10509	2000-06-23 17:34:00	dsDNA viruses, no RNA stage						Viruses	Adenoviridae	Mastadenovirus
532128959	31606	Viruses	species	Human mastadenovirus B	108098	10509	1999-11-15 09:04:00	dsDNA viruses, no RNA stage						Viruses	Adenoviridae	Mastadenovirus
532129004	15265	Viruses	species	Human mastadenovirus D	130310	10509	2000-06-23 17:34:00	dsDNA viruses, no RNA stage						Viruses	Adenoviridae	Mastadenovirus
532129049	31613	Viruses	species	Human mastadenovirus B	108098	10509	1999-11-15 09:04:00	dsDNA viruses, no RNA stage						Viruses	Adenoviridae	Mastadenovirus
532129094	12957	Viruses	species	Human mastadenovirus D	130310	10509	2000-06-23 17:34:00	dsDNA viruses, no RNA stage						Viruses	Adenoviridae	Mastadenovirus
532129187	31768	Viruses	species	Human mastadenovirus B	108098	10509	1999-11-15 09:04:00	dsDNA viruses, no RNA stage						Viruses	Adenoviridae	Mastadenovirus
532129231	14606	Viruses	species	Human mastadenovirus D	130310	10509	2000-06-23 17:34:00	dsDNA viruses, no RNA stage						Viruses	Adenoviridae	Mastadenovirus
532129277	12032	Viruses	species	Human mastadenovirus D	130310	10509	2000-06-23 17:34:00	dsDNA viruses, no RNA stage						Viruses	Adenoviridae	Mastadenovirus
532129322	31804	Viruses	species	Human mastadenovirus B	108098	10509	1999-11-15 09:04:00	dsDNA viruses, no RNA stage						Viruses	Adenoviridae	Mastadenovirus
532129368	32778	Viruses	species	Human mastadenovirus B	108098	10509	1999-11-15 09:04:00	dsDNA viruses, no RNA stage						Viruses	Adenoviridae	Mastadenovirus
532129413	31792	Viruses	species	Human mastadenovirus B	108098	10509	1999-11-15 09:04:00	dsDNA viruses, no RNA stage						Viruses	Adenoviridae	Mastadenovirus
532130058	14062	Viruses	species	Human mastadenovirus D	130310	10509	2000-06-23 17:34:00	dsDNA viruses, no RNA stage						Viruses	Adenoviridae	Mastadenovirus
532130103	12477	Viruses	species	Human mastadenovirus D	130310	10509	2000-06-23 17:34:00	dsDNA viruses, no RNA stage						Viruses	Adenoviridae	Mastadenovirus
532130148	14462	Viruses	species	Human mastadenovirus D	130310	10509	2000-06-23 17:34:00	dsDNA viruses, no RNA stage						Viruses	Adenoviridae	Mastadenovirus
532130193	20590	Viruses	species	Human mastadenovirus D	130310	10509	2000-06-23 17:34:00	dsDNA viruses, no RNA stage						Viruses	Adenoviridae	Mastadenovirus
532130194	15011	Viruses	species	Human mastadenovirus D	130310	10509	2000-06-23 17:34:00	dsDNA viruses, no RNA stage						Viruses	Adenoviridae	Mastadenovirus
532130238	14704	Viruses	species	Human mastadenovirus D	130310	10509	2000-06-23 17:34:00	dsDNA viruses, no RNA stage						Viruses	Adenoviridae	Mastadenovirus
532130330	14135	Viruses	species	Human mastadenovirus D	130310	10509	2000-06-23 17:34:00	dsDNA viruses, no RNA stage						Viruses	Adenoviridae	Mastadenovirus
532130377	31183	Viruses	species	Human mastadenovirus B	108098	10509	1999-11-15 09:04:00	dsDNA viruses, no RNA stage						Viruses	Adenoviridae	Mastadenovirus
532130419	12045	Viruses	species	Human mastadenovirus D	130310	10509	2000-06-23 17:34:00	dsDNA viruses, no RNA stage						Viruses	Adenoviridae	Mastadenovirus
532130464	14948	Viruses	species	Human mastadenovirus D	130310	10509	2000-06-23 17:34:00	dsDNA viruses, no RNA stage						Viruses	Adenoviridae	Mastadenovirus
532130510	11492	Viruses	species	Human mastadenovirus C	129951	10509	2000-06-22 13:18:00	dsDNA viruses, no RNA stage						Viruses	Adenoviridae	Mastadenovirus
532130511	13929	Viruses	species	Human mastadenovirus D	130310	10509	2000-06-23 17:34:00	dsDNA viruses, no RNA stage						Viruses	Adenoviridae	Mastadenovirus
532130556	12161	Viruses	species	Human mastadenovirus D	130310	10509	2000-06-23 17:34:00	dsDNA viruses, no RNA stage						Viruses	Adenoviridae	Mastadenovirus
532130601	14626	Viruses	species	Human mastadenovirus D	130310	10509	2000-06-23 17:34:00	dsDNA viruses, no RNA stage						Viruses	Adenoviridae	Mastadenovirus
532130645	13793	Viruses	species	Human mastadenovirus D	130310	10509	2000-06-23 17:34:00	dsDNA viruses, no RNA stage						Viruses	Adenoviridae	Mastadenovirus
532130688	19191	Viruses	species	Human mastadenovirus D	130310	10509	2000-06-23 17:34:00	dsDNA viruses, no RNA stage						Viruses	Adenoviridae	Mastadenovirus
532130689	11841	Viruses	species	Human mastadenovirus C	129951	10509	2000-06-22 13:18:00	dsDNA viruses, no RNA stage						Viruses	Adenoviridae	Mastadenovirus
532130690	18038	Viruses	species	Human mastadenovirus D	130310	10509	2000-06-23 17:34:00	dsDNA viruses, no RNA stage						Viruses	Adenoviridae	Mastadenovirus
532130691	15409	Viruses	species	Human mastadenovirus D	130310	10509	2000-06-23 17:34:00	dsDNA viruses, no RNA stage						Viruses	Adenoviridae	Mastadenovirus
532130692	16004	Viruses	species	Human mastadenovirus D	130310	10509	2000-06-23 17:34:00	dsDNA viruses, no RNA stage						Viruses	Adenoviridae	Mastadenovirus
532130693	31562	Viruses	species	Human mastadenovirus B	108098	10509	1999-11-15 09:04:00	dsDNA viruses, no RNA stage						Viruses	Adenoviridae	Mastadenovirus
532130694	16657	Viruses	species	Human mastadenovirus D	130310	10509	2000-06-23 17:34:00	dsDNA viruses, no RNA stage						Viruses	Adenoviridae	Mastadenovirus
532130695	15961	Viruses	species	Human mastadenovirus D	130310	10509	2000-06-23 17:34:00	dsDNA viruses, no RNA stage						Viruses	Adenoviridae	Mastadenovirus
532130696	12423	Viruses	species	Human mastadenovirus D	130310	10509	2000-06-23 17:34:00	dsDNA viruses, no RNA stage						Viruses	Adenoviridae	Mastadenovirus
532130740	31134	Viruses	species	Human mastadenovirus B	108098	10509	1999-11-15 09:04:00	dsDNA viruses, no RNA stage						Viruses	Adenoviridae	Mastadenovirus
532130741	12299	Viruses	species	Human mastadenovirus D	130310	10509	2000-06-23 17:34:00	dsDNA viruses, no RNA stage						Viruses	Adenoviridae	Mastadenovirus
532130742	7631	Viruses	species	Human mastadenovirus C	129951	10509	2000-06-22 13:18:00	dsDNA viruses, no RNA stage						Viruses	Adenoviridae	Mastadenovirus
540155826	31967	Viruses	species	Simian adenovirus 18	909210	413684	2010-10-20 18:00:47	dsDNA viruses, no RNA stage	unclassified Simian adenoviruses					Viruses	Adenoviridae	Mastadenovirus
542098354	34732	Viruses	species	Human mastadenovirus B	108098	10509	1999-11-15 09:04:00	dsDNA viruses, no RNA stage						Viruses	Adenoviridae	Mastadenovirus
545693829	15873	Viruses	no rank	Human adenovirus 23	46925	130310	1996-05-20 01:00:00	dsDNA viruses, no RNA stage						Viruses	Adenoviridae	Mastadenovirus	Human mastadenovirus D
555928177	42940	Viruses	species	Turkey adenovirus 4	1408257	280050	2013-10-28 01:01:39	dsDNA viruses, no RNA stage	unclassified Aviadenovirus					Viruses	Adenoviridae	Aviadenovirus
555928211	43686	Viruses	species	Turkey adenovirus 5	1408258	280050	2013-10-28 01:01:39	dsDNA viruses, no RNA stage	unclassified Aviadenovirus					Viruses	Adenoviridae	Aviadenovirus
567315454	25517	Viruses	no rank	Human adenovirus 41	10524	130309	1994-09-21 01:00:00	dsDNA viruses, no RNA stage						Viruses	Adenoviridae	Mastadenovirus	Human mastadenovirus F
106006027	1027	Viruses	species	Cyprinid herpesvirus 3	180230	692606	2001-12-19 18:01:00	dsDNA viruses, no RNA stage						Viruses	Alloherpesviridae	Cyprinivirus		Herpesvirales
109138081	2105	Viruses	species	Ranid herpesvirus 2	389214	692605	2006-06-20 18:00:23	dsDNA viruses, no RNA stage						Viruses	Alloherpesviridae	Batrachovirus		Herpesvirales
109138229	819	Viruses	species	Ranid herpesvirus 1	85655	692605	1999-02-04	dsDNA viruses, no RNA stage						Viruses	Alloherpesviridae	Batrachovirus		Herpesvirales
109638461	220859	Viruses	species	Ranid herpesvirus 1	85655	692605	1999-02-04	dsDNA viruses, no RNA stage						Viruses	Alloherpesviridae	Batrachovirus		Herpesvirales
109638594	231801	Viruses	species	Ranid herpesvirus 2	389214	692605	2006-06-20 18:00:23	dsDNA viruses, no RNA stage						Viruses	Alloherpesviridae	Batrachovirus		Herpesvirales
109706605	696	Viruses	species	Cyprinid herpesvirus 3	180230	692606	2001-12-19 18:01:00	dsDNA viruses, no RNA stage						Viruses	Alloherpesviridae	Cyprinivirus		Herpesvirales
129560509	5330	Viruses	species	Cyprinid herpesvirus 3	180230	692606	2001-12-19 18:01:00	dsDNA viruses, no RNA stage						Viruses	Alloherpesviridae	Cyprinivirus		Herpesvirales
131840030	295146	Viruses	species	Cyprinid herpesvirus 3	180230	692606	2001-12-19 18:01:00	dsDNA viruses, no RNA stage						Viruses	Alloherpesviridae	Cyprinivirus		Herpesvirales
386685960	2135	Viruses	species	Cyprinid herpesvirus 1	317858	692606	2005-05-01 18:03:43	dsDNA viruses, no RNA stage						Viruses	Alloherpesviridae	Cyprinivirus		Herpesvirales
386686104	2364	Viruses	species	Cyprinid herpesvirus 2	317878	692606	2005-05-01 18:03:43	dsDNA viruses, no RNA stage						Viruses	Alloherpesviridae	Cyprinivirus		Herpesvirales
388260200	638	Viruses	species	Anguillid herpesvirus 1	150286	692606	2001-02-02 18:02:00	dsDNA viruses, no RNA stage						Viruses	Alloherpesviridae	Cyprinivirus		Herpesvirales
388262476	248526	Viruses	species	Anguillid herpesvirus 1	150286	692606	2001-02-02 18:02:00	dsDNA viruses, no RNA stage						Viruses	Alloherpesviridae	Cyprinivirus		Herpesvirales
422933554	291144	Viruses	species	Cyprinid herpesvirus 1	317858	692606	2005-05-01 18:03:43	dsDNA viruses, no RNA stage						Viruses	Alloherpesviridae	Cyprinivirus		Herpesvirales
422933791	290304	Viruses	species	Cyprinid herpesvirus 2	317878	692606	2005-05-01 18:03:43	dsDNA viruses, no RNA stage						Viruses	Alloherpesviridae	Cyprinivirus		Herpesvirales
519868059	2042	Viruses	species	Ictalurid herpesvirus 1	10401	172653	1993-08-02 01:00:00	dsDNA viruses, no RNA stage						Viruses	Alloherpesviridae	Ictalurivirus		Herpesvirales
519904135	134226	Viruses	species	Ictalurid herpesvirus 1	10401	172653	1993-08-02 01:00:00	dsDNA viruses, no RNA stage						Viruses	Alloherpesviridae	Ictalurivirus		Herpesvirales
2959440	455	Viruses	species	Torque teno virus 1	687340	687331	2009-10-31 18:00:40	ssDNA viruses						Viruses	Anelloviridae	Alphatorquevirus
3378184	3739	Viruses	species	Torque teno virus	68887	363628	1998-03-14	ssDNA viruses	unclassified Anelloviridae					Viruses	Anelloviridae
4406542	3739	Viruses	species	Torque teno virus	68887	363628	1998-03-14	ssDNA viruses	unclassified Anelloviridae					Viruses	Anelloviridae
4574801	3852	Viruses	species	Torque teno virus	68887	363628	1998-03-14	ssDNA viruses	unclassified Anelloviridae					Viruses	Anelloviridae
4768832	3739	Viruses	species	Torque teno virus	68887	363628	1998-03-14	ssDNA viruses	unclassified Anelloviridae					Viruses	Anelloviridae
5478532	3853	Viruses	species	Torque teno virus	68887	363628	1998-03-14	ssDNA viruses	unclassified Anelloviridae					Viruses	Anelloviridae
5597008	3853	Viruses	species	Torque teno virus	68887	363628	1998-03-14	ssDNA viruses	unclassified Anelloviridae					Viruses	Anelloviridae
5616135	3852	Viruses	species	Torque teno virus	68887	363628	1998-03-14	ssDNA viruses	unclassified Anelloviridae					Viruses	Anelloviridae
5616140	3839	Viruses	species	Torque teno virus	68887	363628	1998-03-14	ssDNA viruses	unclassified Anelloviridae					Viruses	Anelloviridae
5616144	3537	Viruses	species	Torque teno virus	68887	363628	1998-03-14	ssDNA viruses	unclassified Anelloviridae					Viruses	Anelloviridae
5616149	3840	Viruses	species	Torque teno virus	68887	363628	1998-03-14	ssDNA viruses	unclassified Anelloviridae					Viruses	Anelloviridae
5616158	3839	Viruses	species	Torque teno virus	68887	363628	1998-03-14	ssDNA viruses	unclassified Anelloviridae					Viruses	Anelloviridae
5616162	3839	Viruses	species	Torque teno virus	68887	363628	1998-03-14	ssDNA viruses	unclassified Anelloviridae					Viruses	Anelloviridae
6463708	2860	Viruses	species	TTV-like mini virus	93678	363628	2000-01-10 17:53:00	ssDNA viruses	unclassified Anelloviridae					Viruses	Anelloviridae
7415881	3795	Viruses	species	Torque teno virus	68887	363628	1998-03-14	ssDNA viruses	unclassified Anelloviridae					Viruses	Anelloviridae
7415884	3792	Viruses	species	Torque teno virus	68887	363628	1998-03-14	ssDNA viruses	unclassified Anelloviridae					Viruses	Anelloviridae
7415907	2841	Viruses	species	TTV-like mini virus	93678	363628	2000-01-10 17:53:00	ssDNA viruses	unclassified Anelloviridae					Viruses	Anelloviridae
7415914	2841	Viruses	species	TTV-like mini virus	93678	363628	2000-01-10 17:53:00	ssDNA viruses	unclassified Anelloviridae					Viruses	Anelloviridae
7415926	142	Viruses	species	Torque teno mini virus 9	687377	687332	2009-10-31 18:00:40	ssDNA viruses						Viruses	Anelloviridae	Betatorquevirus
7657957	3794	Viruses	species	Torque teno virus	68887	363628	1998-03-14	ssDNA viruses	unclassified Anelloviridae					Viruses	Anelloviridae
9049775	3817	Viruses	species	Torque teno virus	68887	363628	1998-03-14	ssDNA viruses	unclassified Anelloviridae					Viruses	Anelloviridae
9049776	3838	Viruses	species	Torque teno virus	68887	363628	1998-03-14	ssDNA viruses	unclassified Anelloviridae					Viruses	Anelloviridae
9634957	2915	Viruses	species	Torque teno mini virus 9	687377	687332	2009-10-31 18:00:40	ssDNA viruses						Viruses	Anelloviridae	Betatorquevirus
10304415	3756	Viruses	species	Torque teno virus	68887	363628	1998-03-14	ssDNA viruses	unclassified Anelloviridae					Viruses	Anelloviridae
13540383	3852	Viruses	species	Torque teno virus	68887	363628	1998-03-14	ssDNA viruses	unclassified Anelloviridae					Viruses	Anelloviridae
14588527	3792	Viruses	species	Torque teno virus	68887	363628	1998-03-14	ssDNA viruses	unclassified Anelloviridae					Viruses	Anelloviridae
17827189	3712	Viruses	species	Torque teno virus	68887	363628	1998-03-14	ssDNA viruses	unclassified Anelloviridae					Viruses	Anelloviridae
17827196	3570	Viruses	species	Torque teno virus	68887	363628	1998-03-14	ssDNA viruses	unclassified Anelloviridae					Viruses	Anelloviridae
17827210	3669	Viruses	species	Torque teno virus	68887	363628	1998-03-14	ssDNA viruses	unclassified Anelloviridae					Viruses	Anelloviridae
17827217	3682	Viruses	species	Torque teno virus	68887	363628	1998-03-14	ssDNA viruses	unclassified Anelloviridae					Viruses	Anelloviridae
17827223	3626	Viruses	species	Torque teno virus	68887	363628	1998-03-14	ssDNA viruses	unclassified Anelloviridae					Viruses	Anelloviridae
17827230	3485	Viruses	species	Torque teno virus	68887	363628	1998-03-14	ssDNA viruses	unclassified Anelloviridae					Viruses	Anelloviridae
17827237	3076	Viruses	species	Torque teno virus	68887	363628	1998-03-14	ssDNA viruses	unclassified Anelloviridae					Viruses	Anelloviridae
17827243	3759	Viruses	species	Torque teno virus	68887	363628	1998-03-14	ssDNA viruses	unclassified Anelloviridae					Viruses	Anelloviridae
17827257	3701	Viruses	species	Torque teno virus	68887	363628	1998-03-14	ssDNA viruses	unclassified Anelloviridae					Viruses	Anelloviridae
29502191	3852	Viruses	species	Torque teno virus 1	687340	687331	2009-10-31 18:00:40	ssDNA viruses						Viruses	Anelloviridae	Alphatorquevirus
49202944	3740	Viruses	species	Torque teno virus	68887	363628	1998-03-14	ssDNA viruses	unclassified Anelloviridae					Viruses	Anelloviridae
49202948	3742	Viruses	species	Torque teno virus	68887	363628	1998-03-14	ssDNA viruses	unclassified Anelloviridae					Viruses	Anelloviridae
49202952	3742	Viruses	species	Torque teno virus	68887	363628	1998-03-14	ssDNA viruses	unclassified Anelloviridae					Viruses	Anelloviridae
49202957	3742	Viruses	species	Torque teno virus	68887	363628	1998-03-14	ssDNA viruses	unclassified Anelloviridae					Viruses	Anelloviridae
49202961	3743	Viruses	species	Torque teno virus	68887	363628	1998-03-14	ssDNA viruses	unclassified Anelloviridae					Viruses	Anelloviridae
49202965	3741	Viruses	species	Torque teno virus	68887	363628	1998-03-14	ssDNA viruses	unclassified Anelloviridae					Viruses	Anelloviridae
49202969	3757	Viruses	species	Torque teno virus	68887	363628	1998-03-14	ssDNA viruses	unclassified Anelloviridae					Viruses	Anelloviridae
49202973	3755	Viruses	species	Torque teno virus	68887	363628	1998-03-14	ssDNA viruses	unclassified Anelloviridae					Viruses	Anelloviridae
49202977	3756	Viruses	species	Torque teno virus	68887	363628	1998-03-14	ssDNA viruses	unclassified Anelloviridae					Viruses	Anelloviridae
49202981	3757	Viruses	species	Torque teno virus	68887	363628	1998-03-14	ssDNA viruses	unclassified Anelloviridae					Viruses	Anelloviridae
49202985	3758	Viruses	species	Torque teno virus	68887	363628	1998-03-14	ssDNA viruses	unclassified Anelloviridae					Viruses	Anelloviridae
49202989	3756	Viruses	species	Torque teno virus	68887	363628	1998-03-14	ssDNA viruses	unclassified Anelloviridae					Viruses	Anelloviridae
49202993	3757	Viruses	species	Torque teno virus	68887	363628	1998-03-14	ssDNA viruses	unclassified Anelloviridae					Viruses	Anelloviridae
49202997	3757	Viruses	species	Torque teno virus	68887	363628	1998-03-14	ssDNA viruses	unclassified Anelloviridae					Viruses	Anelloviridae
49203001	3772	Viruses	species	Torque teno virus	68887	363628	1998-03-14	ssDNA viruses	unclassified Anelloviridae					Viruses	Anelloviridae
49203004	3700	Viruses	species	Torque teno virus	68887	363628	1998-03-14	ssDNA viruses	unclassified Anelloviridae					Viruses	Anelloviridae
49203008	3700	Viruses	species	Torque teno virus	68887	363628	1998-03-14	ssDNA viruses	unclassified Anelloviridae					Viruses	Anelloviridae
49203012	3700	Viruses	species	Torque teno virus	68887	363628	1998-03-14	ssDNA viruses	unclassified Anelloviridae					Viruses	Anelloviridae
49203017	3752	Viruses	species	Torque teno virus	68887	363628	1998-03-14	ssDNA viruses	unclassified Anelloviridae					Viruses	Anelloviridae
49203022	3753	Viruses	species	Torque teno virus	68887	363628	1998-03-14	ssDNA viruses	unclassified Anelloviridae					Viruses	Anelloviridae
49203026	3759	Viruses	species	Torque teno virus	68887	363628	1998-03-14	ssDNA viruses	unclassified Anelloviridae					Viruses	Anelloviridae
49203030	3752	Viruses	species	Torque teno virus	68887	363628	1998-03-14	ssDNA viruses	unclassified Anelloviridae					Viruses	Anelloviridae
49203034	3752	Viruses	species	Torque teno virus	68887	363628	1998-03-14	ssDNA viruses	unclassified Anelloviridae					Viruses	Anelloviridae
49203040	3753	Viruses	species	Torque teno virus	68887	363628	1998-03-14	ssDNA viruses	unclassified Anelloviridae					Viruses	Anelloviridae
52854167	2635	Viruses	no rank	Small anellovirus 2	289367	393049	2004-12-07 18:03:35	ssDNA viruses	unclassified Anelloviridae					Viruses	Anelloviridae		Small anellovirus
58613381	3816	Viruses	species	Torque teno virus	68887	363628	1998-03-14	ssDNA viruses	unclassified Anelloviridae					Viruses	Anelloviridae
58613386	3920	Viruses	species	Torque teno virus	68887	363628	1998-03-14	ssDNA viruses	unclassified Anelloviridae					Viruses	Anelloviridae
58613391	2481	Viruses	species	Torque teno sus virus 1a	687386	687339	2009-10-31 18:00:40	ssDNA viruses						Viruses	Anelloviridae	Iotatorquevirus
62721482	2897	Viruses	species	Torque teno virus	68887	363628	1998-03-14	ssDNA viruses	unclassified Anelloviridae					Viruses	Anelloviridae
62721486	2897	Viruses	species	Torque teno virus	68887	363628	1998-03-14	ssDNA viruses	unclassified Anelloviridae					Viruses	Anelloviridae
62721490	2897	Viruses	species	Torque teno virus	68887	363628	1998-03-14	ssDNA viruses	unclassified Anelloviridae					Viruses	Anelloviridae
62721494	2897	Viruses	species	Torque teno virus	68887	363628	1998-03-14	ssDNA viruses	unclassified Anelloviridae					Viruses	Anelloviridae
66391749	2249	Viruses	no rank	Small anellovirus 1	289366	393049	2004-12-07 18:03:35	ssDNA viruses	unclassified Anelloviridae					Viruses	Anelloviridae		Small anellovirus
66391753	2635	Viruses	no rank	Small anellovirus 2	289367	393049	2004-12-07 18:03:35	ssDNA viruses	unclassified Anelloviridae					Viruses	Anelloviridae		Small anellovirus
134026382	2050	Viruses	species	Torque teno midi virus 1	687379	687333	2009-10-31 18:00:40	ssDNA viruses						Viruses	Anelloviridae	Gammatorquevirus
134133206	3245	Viruses	species	Torque teno midi virus 1	687379	687333	2009-10-31 18:00:40	ssDNA viruses						Viruses	Anelloviridae	Gammatorquevirus
156104001	3773	Viruses	no rank	TT virus sle1957	443975	443974	2007-08-17 18:00:27	ssDNA viruses	unclassified Anelloviridae	TT virus sle				Viruses	Anelloviridae		Torque teno virus
156104028	3760	Viruses	no rank	TT virus sle1931	444002	443974	2007-08-17 18:00:27	ssDNA viruses	unclassified Anelloviridae	TT virus sle				Viruses	Anelloviridae		Torque teno virus
156104029	3759	Viruses	no rank	TT virus sle1932	444003	443974	2007-08-17 18:00:27	ssDNA viruses	unclassified Anelloviridae	TT virus sle				Viruses	Anelloviridae		Torque teno virus
156104055	3757	Viruses	no rank	TT virus sle2057	444029	443974	2007-08-17 18:00:27	ssDNA viruses	unclassified Anelloviridae	TT virus sle				Viruses	Anelloviridae		Torque teno virus
156104056	3758	Viruses	no rank	TT virus sle2058	444030	443974	2007-08-17 18:00:27	ssDNA viruses	unclassified Anelloviridae	TT virus sle				Viruses	Anelloviridae		Torque teno virus
156104057	3759	Viruses	no rank	TT virus sle2072	444031	443974	2007-08-17 18:00:27	ssDNA viruses	unclassified Anelloviridae	TT virus sle				Viruses	Anelloviridae		Torque teno virus
156104058	3759	Viruses	no rank	TT virus sle2061	444032	443974	2007-08-17 18:00:27	ssDNA viruses	unclassified Anelloviridae	TT virus sle				Viruses	Anelloviridae		Torque teno virus
156104059	3759	Viruses	no rank	TT virus sle2065	444033	443974	2007-08-17 18:00:27	ssDNA viruses	unclassified Anelloviridae	TT virus sle				Viruses	Anelloviridae		Torque teno virus
217416834	3260	Viruses	species	Torque teno virus	68887	363628	1998-03-14	ssDNA viruses	unclassified Anelloviridae					Viruses	Anelloviridae
224504298	2140	Viruses	species	Torque teno zalophus virus 1	1218490	1218489	2009-03-03 18:00:32	ssDNA viruses						Viruses	Anelloviridae	Lambdatorquevirus
238817556	2444	Viruses	species	Torque teno sus virus 1a	687386	687339	2009-10-31 18:00:40	ssDNA viruses						Viruses	Anelloviridae	Iotatorquevirus
270304338	2396	Viruses	species	Torque teno sus virus 1a	687386	687339	2009-10-31 18:00:40	ssDNA viruses						Viruses	Anelloviridae	Iotatorquevirus
290574433	688	Viruses	species	Torque teno sus virus 1a	687386	687339	2009-10-31 18:00:40	ssDNA viruses						Viruses	Anelloviridae	Iotatorquevirus
290574438	2444	Viruses	species	Torque teno sus virus 1a	687386	687339	2009-10-31 18:00:40	ssDNA viruses						Viruses	Anelloviridae	Iotatorquevirus
295413830	2064	Viruses	species	Torque teno felis virus	687384	687337	2009-10-31 18:00:40	ssDNA viruses						Viruses	Anelloviridae	Etatorquevirus
295413834	3629	Viruses	species	Torque teno virus 28	687367	687331	2009-10-31 18:00:40	ssDNA viruses						Viruses	Anelloviridae	Alphatorquevirus
295413915	2910	Viruses	species	Torque teno mini virus 8	687376	687332	2009-10-30 18:00:37	ssDNA viruses						Viruses	Anelloviridae	Betatorquevirus
295413918	3729	Viruses	species	Torque teno virus 27	687366	687331	2009-10-31 18:00:40	ssDNA viruses						Viruses	Anelloviridae	Alphatorquevirus
295413923	3759	Viruses	species	Torque teno virus 12	687351	687331	2009-10-31 18:00:40	ssDNA viruses						Viruses	Anelloviridae	Alphatorquevirus
295413928	3770	Viruses	species	Torque teno virus 10	687349	687331	2009-10-31 18:00:40	ssDNA viruses						Viruses	Anelloviridae	Alphatorquevirus
295413933	3690	Viruses	species	Torque teno virus 4	687343	687331	2009-10-31 18:00:40	ssDNA viruses						Viruses	Anelloviridae	Alphatorquevirus
295413936	2878	Viruses	species	Torque teno sus virus 1a	687386	687339	2009-10-31 18:00:40	ssDNA viruses						Viruses	Anelloviridae	Iotatorquevirus
295413940	2797	Viruses	species	Torque teno canis virus	687385	687338	2009-10-31 18:00:40	ssDNA viruses						Viruses	Anelloviridae	Thetatorquevirus
295413944	3899	Viruses	species	Torque teno virus 14	687353	687331	2009-10-31 18:00:40	ssDNA viruses						Viruses	Anelloviridae	Alphatorquevirus
295413947	3808	Viruses	species	Torque teno virus 19	687358	687331	2009-10-31 18:00:40	ssDNA viruses						Viruses	Anelloviridae	Alphatorquevirus
295413950	3798	Viruses	species	Torque teno virus 26	687365	687331	2009-10-31 18:00:40	ssDNA viruses						Viruses	Anelloviridae	Alphatorquevirus
295413954	3736	Viruses	species	Torque teno virus 7	687346	687331	2009-10-30 18:00:37	ssDNA viruses						Viruses	Anelloviridae	Alphatorquevirus
295413958	3748	Viruses	species	Torque teno virus 3	687342	687331	2009-10-30 18:00:37	ssDNA viruses						Viruses	Anelloviridae	Alphatorquevirus
295413965	2952	Viruses	species	Torque teno mini virus 7	687375	687332	2009-10-31 18:00:40	ssDNA viruses						Viruses	Anelloviridae	Betatorquevirus
295413968	3763	Viruses	species	Torque teno virus 25	687364	687331	2009-10-31 18:00:40	ssDNA viruses						Viruses	Anelloviridae	Alphatorquevirus
295413972	3790	Viruses	species	Torque teno virus 8	687347	687331	2009-10-31 18:00:40	ssDNA viruses						Viruses	Anelloviridae	Alphatorquevirus
295413977	3371	Viruses	species	Torque teno tamarin virus	687382	687335	2009-10-31 18:00:40	ssDNA viruses						Viruses	Anelloviridae	Epsilontorquevirus
295413982	2765	Viruses	species	Torque teno mini virus 2	687370	687332	2009-10-31 18:00:40	ssDNA viruses						Viruses	Anelloviridae	Betatorquevirus
295413991	3718	Viruses	species	Torque teno douroucouli virus	687383	687336	2009-10-31 18:00:40	ssDNA viruses						Viruses	Anelloviridae	Zetatorquevirus
295441873	2897	Viruses	species	Torque teno mini virus 3	687371	687332	2009-10-31 18:00:40	ssDNA viruses						Viruses	Anelloviridae	Betatorquevirus
295441877	2908	Viruses	species	Torque teno mini virus 5	687373	687332	2009-10-31 18:00:40	ssDNA viruses						Viruses	Anelloviridae	Betatorquevirus
295441881	2785	Viruses	species	Torque teno mini virus 4	687372	687332	2009-10-31 18:00:40	ssDNA viruses						Viruses	Anelloviridae	Betatorquevirus
295441884	3818	Viruses	species	Torque teno virus 16	687355	687331	2009-10-31 18:00:40	ssDNA viruses						Viruses	Anelloviridae	Alphatorquevirus
295441891	3253	Viruses	species	Torque teno midi virus 2	687380	687333	2009-10-31 18:00:40	ssDNA viruses						Viruses	Anelloviridae	Gammatorquevirus
295441896	3705	Viruses	species	Torque teno virus 6	687345	687331	2009-10-30 18:00:37	ssDNA viruses						Viruses	Anelloviridae	Alphatorquevirus
295441901	2897	Viruses	species	Torque teno mini virus 6	687374	687332	2009-10-31 18:00:40	ssDNA viruses						Viruses	Anelloviridae	Betatorquevirus
295441905	3787	Viruses	species	Torque teno virus 15	687354	687331	2009-10-31 18:00:40	ssDNA viruses						Viruses	Anelloviridae	Alphatorquevirus
295441908	2856	Viruses	species	Torque teno mini virus 1	687369	687332	2009-10-31 18:00:40	ssDNA viruses						Viruses	Anelloviridae	Betatorquevirus
299835123	918	Viruses	species	Torque teno felis virus	687384	687337	2009-10-31 18:00:40	ssDNA viruses						Viruses	Anelloviridae	Etatorquevirus
304435609	2691	Viruses	species	Torque teno sus virus 1a	687386	687339	2009-10-31 18:00:40	ssDNA viruses						Viruses	Anelloviridae	Iotatorquevirus
304435613	2691	Viruses	species	Torque teno sus virus 1a	687386	687339	2009-10-31 18:00:40	ssDNA viruses						Viruses	Anelloviridae	Iotatorquevirus
304435617	2701	Viruses	species	Torque teno sus virus 1a	687386	687339	2009-10-31 18:00:40	ssDNA viruses						Viruses	Anelloviridae	Iotatorquevirus
304435621	2633	Viruses	species	Torque teno sus virus 1a	687386	687339	2009-10-31 18:00:40	ssDNA viruses						Viruses	Anelloviridae	Iotatorquevirus
304435625	2513	Viruses	species	Torque teno sus virus 1a	687386	687339	2009-10-31 18:00:40	ssDNA viruses						Viruses	Anelloviridae	Iotatorquevirus
307341422	2381	Viruses	species	Torque teno sus virus 1a	687386	687339	2009-10-31 18:00:40	ssDNA viruses						Viruses	Anelloviridae	Iotatorquevirus
307341432	2261	Viruses	species	Torque teno sus virus 1a	687386	687339	2009-10-31 18:00:40	ssDNA viruses						Viruses	Anelloviridae	Iotatorquevirus
307341452	1861	Viruses	species	Torque teno sus virus 1a	687386	687339	2009-10-31 18:00:40	ssDNA viruses						Viruses	Anelloviridae	Iotatorquevirus
307341462	2448	Viruses	species	Torque teno sus virus 1a	687386	687339	2009-10-31 18:00:40	ssDNA viruses						Viruses	Anelloviridae	Iotatorquevirus
307341487	2446	Viruses	species	Torque teno sus virus 1a	687386	687339	2009-10-31 18:00:40	ssDNA viruses						Viruses	Anelloviridae	Iotatorquevirus
308944452	2187	Viruses	species	Torque teno virus 10	687349	687331	2009-10-31 18:00:40	ssDNA viruses						Viruses	Anelloviridae	Alphatorquevirus
312192953	3322	Viruses	species	Torque teno virus 2	687341	687331	2009-10-31 18:00:40	ssDNA viruses						Viruses	Anelloviridae	Alphatorquevirus
312234429	2735	Viruses	species	Torque teno sus virus k2	1218488	1218487	2012-08-07 18:01:20	ssDNA viruses						Viruses	Anelloviridae	Kappatorquevirus
325278540	678	Viruses	species	Torque teno canis virus	687385	687338	2009-10-31 18:00:40	ssDNA viruses						Viruses	Anelloviridae	Thetatorquevirus
325961446	2164	Viruses	species	Seal anellovirus TFFN/USA/2006	991022	363628	2011-03-09 18:00:32	ssDNA viruses	unclassified Anelloviridae					Viruses	Anelloviridae
339511345	219	Viruses	species	Torque teno virus	68887	363628	1998-03-14	ssDNA viruses	unclassified Anelloviridae					Viruses	Anelloviridae
339511346	219	Viruses	species	Torque teno virus	68887	363628	1998-03-14	ssDNA viruses	unclassified Anelloviridae					Viruses	Anelloviridae
339511347	205	Viruses	species	Torque teno virus	68887	363628	1998-03-14	ssDNA viruses	unclassified Anelloviridae					Viruses	Anelloviridae
339511348	3701	Viruses	species	Torque teno virus	68887	363628	1998-03-14	ssDNA viruses	unclassified Anelloviridae					Viruses	Anelloviridae
339511349	3700	Viruses	species	Torque teno virus	68887	363628	1998-03-14	ssDNA viruses	unclassified Anelloviridae					Viruses	Anelloviridae
339511350	3699	Viruses	species	Torque teno virus	68887	363628	1998-03-14	ssDNA viruses	unclassified Anelloviridae					Viruses	Anelloviridae
339511351	3700	Viruses	species	Torque teno virus	68887	363628	1998-03-14	ssDNA viruses	unclassified Anelloviridae					Viruses	Anelloviridae
339511352	3867	Viruses	species	Torque teno virus	68887	363628	1998-03-14	ssDNA viruses	unclassified Anelloviridae					Viruses	Anelloviridae
339511353	3868	Viruses	species	Torque teno virus	68887	363628	1998-03-14	ssDNA viruses	unclassified Anelloviridae					Viruses	Anelloviridae
339511354	3865	Viruses	species	Torque teno virus	68887	363628	1998-03-14	ssDNA viruses	unclassified Anelloviridae					Viruses	Anelloviridae
339511355	3866	Viruses	species	Torque teno virus	68887	363628	1998-03-14	ssDNA viruses	unclassified Anelloviridae					Viruses	Anelloviridae
339511356	3866	Viruses	species	Torque teno virus	68887	363628	1998-03-14	ssDNA viruses	unclassified Anelloviridae					Viruses	Anelloviridae
339511357	3866	Viruses	species	Torque teno virus	68887	363628	1998-03-14	ssDNA viruses	unclassified Anelloviridae					Viruses	Anelloviridae
339511358	3867	Viruses	species	Torque teno virus	68887	363628	1998-03-14	ssDNA viruses	unclassified Anelloviridae					Viruses	Anelloviridae
339511359	3866	Viruses	species	Torque teno virus	68887	363628	1998-03-14	ssDNA viruses	unclassified Anelloviridae					Viruses	Anelloviridae
339511360	3865	Viruses	species	Torque teno virus	68887	363628	1998-03-14	ssDNA viruses	unclassified Anelloviridae					Viruses	Anelloviridae
339511361	3865	Viruses	species	Torque teno virus	68887	363628	1998-03-14	ssDNA viruses	unclassified Anelloviridae					Viruses	Anelloviridae
339511362	3866	Viruses	species	Torque teno virus	68887	363628	1998-03-14	ssDNA viruses	unclassified Anelloviridae					Viruses	Anelloviridae
339511363	3872	Viruses	species	Torque teno virus	68887	363628	1998-03-14	ssDNA viruses	unclassified Anelloviridae					Viruses	Anelloviridae
339511364	3756	Viruses	species	Torque teno virus	68887	363628	1998-03-14	ssDNA viruses	unclassified Anelloviridae					Viruses	Anelloviridae
339511365	3859	Viruses	species	Torque teno virus	68887	363628	1998-03-14	ssDNA viruses	unclassified Anelloviridae					Viruses	Anelloviridae
339511366	3860	Viruses	species	Torque teno virus	68887	363628	1998-03-14	ssDNA viruses	unclassified Anelloviridae					Viruses	Anelloviridae
339511367	3797	Viruses	species	Torque teno virus	68887	363628	1998-03-14	ssDNA viruses	unclassified Anelloviridae					Viruses	Anelloviridae
339511368	3878	Viruses	species	Torque teno virus	68887	363628	1998-03-14	ssDNA viruses	unclassified Anelloviridae					Viruses	Anelloviridae
339511369	3834	Viruses	species	Torque teno virus	68887	363628	1998-03-14	ssDNA viruses	unclassified Anelloviridae					Viruses	Anelloviridae
339511370	3877	Viruses	species	Torque teno virus	68887	363628	1998-03-14	ssDNA viruses	unclassified Anelloviridae					Viruses	Anelloviridae
339511371	3880	Viruses	species	Torque teno virus	68887	363628	1998-03-14	ssDNA viruses	unclassified Anelloviridae					Viruses	Anelloviridae
339511372	3875	Viruses	species	Torque teno virus	68887	363628	1998-03-14	ssDNA viruses	unclassified Anelloviridae					Viruses	Anelloviridae
339511373	3881	Viruses	species	Torque teno virus	68887	363628	1998-03-14	ssDNA viruses	unclassified Anelloviridae					Viruses	Anelloviridae
339511374	3815	Viruses	species	Torque teno virus	68887	363628	1998-03-14	ssDNA viruses	unclassified Anelloviridae					Viruses	Anelloviridae
339511375	3816	Viruses	species	Torque teno virus	68887	363628	1998-03-14	ssDNA viruses	unclassified Anelloviridae					Viruses	Anelloviridae
339511376	3758	Viruses	species	Torque teno virus	68887	363628	1998-03-14	ssDNA viruses	unclassified Anelloviridae					Viruses	Anelloviridae
339511377	3757	Viruses	species	Torque teno virus	68887	363628	1998-03-14	ssDNA viruses	unclassified Anelloviridae					Viruses	Anelloviridae
339511378	3759	Viruses	species	Torque teno virus	68887	363628	1998-03-14	ssDNA viruses	unclassified Anelloviridae					Viruses	Anelloviridae
339511379	3759	Viruses	species	Torque teno virus	68887	363628	1998-03-14	ssDNA viruses	unclassified Anelloviridae					Viruses	Anelloviridae
339511380	3758	Viruses	species	Torque teno virus	68887	363628	1998-03-14	ssDNA viruses	unclassified Anelloviridae					Viruses	Anelloviridae
339511381	3760	Viruses	species	Torque teno virus	68887	363628	1998-03-14	ssDNA viruses	unclassified Anelloviridae					Viruses	Anelloviridae
339511382	3756	Viruses	species	Torque teno virus	68887	363628	1998-03-14	ssDNA viruses	unclassified Anelloviridae					Viruses	Anelloviridae
339511383	3757	Viruses	species	Torque teno virus	68887	363628	1998-03-14	ssDNA viruses	unclassified Anelloviridae					Viruses	Anelloviridae
339511384	3756	Viruses	species	Torque teno virus	68887	363628	1998-03-14	ssDNA viruses	unclassified Anelloviridae					Viruses	Anelloviridae
339511385	3757	Viruses	species	Torque teno virus	68887	363628	1998-03-14	ssDNA viruses	unclassified Anelloviridae					Viruses	Anelloviridae
339511386	3756	Viruses	species	Torque teno virus	68887	363628	1998-03-14	ssDNA viruses	unclassified Anelloviridae					Viruses	Anelloviridae
339511387	3758	Viruses	species	Torque teno virus	68887	363628	1998-03-14	ssDNA viruses	unclassified Anelloviridae					Viruses	Anelloviridae
339832375	3725	Viruses	species	Torque teno virus	68887	363628	1998-03-14	ssDNA viruses	unclassified Anelloviridae					Viruses	Anelloviridae
340001914	213	Viruses	species	Torque teno canis virus	687385	687338	2009-10-31 18:00:40	ssDNA viruses						Viruses	Anelloviridae	Thetatorquevirus
346328838	2608	Viruses	species	Torque teno sus virus 1a	687386	687339	2009-10-31 18:00:40	ssDNA viruses						Viruses	Anelloviridae	Iotatorquevirus
346328841	2764	Viruses	species	Torque teno sus virus 1a	687386	687339	2009-10-31 18:00:40	ssDNA viruses						Viruses	Anelloviridae	Iotatorquevirus
374676499	836	Viruses	species	Torque teno sus virus 1a	687386	687339	2009-10-31 18:00:40	ssDNA viruses						Viruses	Anelloviridae	Iotatorquevirus
381140099	3814	Viruses	species	Torque teno virus	68887	363628	1998-03-14	ssDNA viruses	unclassified Anelloviridae					Viruses	Anelloviridae
381140100	3759	Viruses	species	Torque teno virus	68887	363628	1998-03-14	ssDNA viruses	unclassified Anelloviridae					Viruses	Anelloviridae
381140101	3749	Viruses	species	Torque teno virus	68887	363628	1998-03-14	ssDNA viruses	unclassified Anelloviridae					Viruses	Anelloviridae
381140102	3752	Viruses	species	Torque teno virus	68887	363628	1998-03-14	ssDNA viruses	unclassified Anelloviridae					Viruses	Anelloviridae
381140103	3749	Viruses	species	Torque teno virus	68887	363628	1998-03-14	ssDNA viruses	unclassified Anelloviridae					Viruses	Anelloviridae
387355606	976	Viruses	species	Torque teno sus virus 1a	687386	687339	2009-10-31 18:00:40	ssDNA viruses						Viruses	Anelloviridae	Iotatorquevirus
387355610	389	Viruses	species	Torque teno sus virus 1a	687386	687339	2009-10-31 18:00:40	ssDNA viruses						Viruses	Anelloviridae	Iotatorquevirus
387355614	847	Viruses	species	Torque teno sus virus 1a	687386	687339	2009-10-31 18:00:40	ssDNA viruses						Viruses	Anelloviridae	Iotatorquevirus
397770614	2556	Viruses	species	Torque teno sus virus 1a	687386	687339	2009-10-31 18:00:40	ssDNA viruses						Viruses	Anelloviridae	Iotatorquevirus
402170024	703	Viruses	no rank	Porcine torque teno virus 1	1225860	687386	2012-08-28 18:01:00	ssDNA viruses						Viruses	Anelloviridae	Iotatorquevirus	Torque teno sus virus 1a
402170028	2611	Viruses	no rank	Porcine torque teno virus 1	1225860	687386	2012-08-28 18:01:00	ssDNA viruses						Viruses	Anelloviridae	Iotatorquevirus	Torque teno sus virus 1a
408406302	2901	Viruses	no rank	Torque teno sus virus k2b	1239832	1218488	2012-10-10 13:01:08	ssDNA viruses						Viruses	Anelloviridae	Kappatorquevirus	Torque teno sus virus k2
408406307	2899	Viruses	no rank	Torque teno sus virus k2b	1239832	1218488	2012-10-10 13:01:08	ssDNA viruses						Viruses	Anelloviridae	Kappatorquevirus	Torque teno sus virus k2
408406312	2899	Viruses	no rank	Torque teno sus virus k2b	1239832	1218488	2012-10-10 13:01:08	ssDNA viruses						Viruses	Anelloviridae	Kappatorquevirus	Torque teno sus virus k2
410185136	2247	Viruses	species	Torque teno sus virus 1a	687386	687339	2009-10-31 18:00:40	ssDNA viruses						Viruses	Anelloviridae	Iotatorquevirus
410185141	879	Viruses	species	Torque teno sus virus 1a	687386	687339	2009-10-31 18:00:40	ssDNA viruses						Viruses	Anelloviridae	Iotatorquevirus
459958119	2978	Viruses	species	TTV-like mini virus	93678	363628	2000-01-10 17:53:00	ssDNA viruses	unclassified Anelloviridae					Viruses	Anelloviridae
459958124	2913	Viruses	species	TTV-like mini virus	93678	363628	2000-01-10 17:53:00	ssDNA viruses	unclassified Anelloviridae					Viruses	Anelloviridae
470457049	2912	Viruses	species	TTV-like mini virus	93678	363628	2000-01-10 17:53:00	ssDNA viruses	unclassified Anelloviridae					Viruses	Anelloviridae
558850474	2853	Viruses	species	TTV-like mini virus	93678	363628	2000-01-10 17:53:00	ssDNA viruses	unclassified Anelloviridae					Viruses	Anelloviridae
558850478	2853	Viruses	species	TTV-like mini virus	93678	363628	2000-01-10 17:53:00	ssDNA viruses	unclassified Anelloviridae					Viruses	Anelloviridae
58641	3417	Viruses	species	Lassa virus	11620	208896	1993-04-24 01:00:00	ssRNA viruses	ssRNA negative-strand viruses	Old world arenaviruses				Viruses	Arenaviridae	Arenavirus
331379	3375	Viruses	species	Lymphocytic choriomeningitis virus	11623	208896	1993-04-24 01:00:00	ssRNA viruses	ssRNA negative-strand viruses	Old world arenaviruses				Viruses	Arenaviridae	Arenavirus
3426338	3090	Viruses	species	Pichinde virus	11630	208897	1993-08-02 01:00:00	ssRNA viruses	ssRNA negative-strand viruses	New world arenaviruses				Viruses	Arenaviridae	Arenavirus
3426341	3107	Viruses	species	Pichinde virus	11630	208897	1993-08-02 01:00:00	ssRNA viruses	ssRNA negative-strand viruses	New world arenaviruses				Viruses	Arenaviridae	Arenavirus
3426344	3089	Viruses	species	Pichinde virus	11630	208897	1993-08-02 01:00:00	ssRNA viruses	ssRNA negative-strand viruses	New world arenaviruses				Viruses	Arenaviridae	Arenavirus
3426347	3118	Viruses	species	Pichinde virus	11630	208897	1993-08-02 01:00:00	ssRNA viruses	ssRNA negative-strand viruses	New world arenaviruses				Viruses	Arenaviridae	Arenavirus
4101560	7219	Viruses	species	Lymphocytic choriomeningitis virus	11623	208896	1993-04-24 01:00:00	ssRNA viruses	ssRNA negative-strand viruses	Old world arenaviruses				Viruses	Arenaviridae	Arenavirus
9294835	3390	Viruses	species	Lassa virus	11620	208896	1993-04-24 01:00:00	ssRNA viruses	ssRNA negative-strand viruses	Old world arenaviruses				Viruses	Arenaviridae	Arenavirus
9294838	3372	Viruses	species	Lassa virus	11620	208896	1993-04-24 01:00:00	ssRNA viruses	ssRNA negative-strand viruses	Old world arenaviruses				Viruses	Arenaviridae	Arenavirus
12007537	3326	Viruses	species	Allpahuayo virus	144752	208897	2001-01-16 12:26:00	ssRNA viruses	ssRNA negative-strand viruses	New world arenaviruses				Viruses	Arenaviridae	Arenavirus
13274351	192	Viruses	species	Pirital virus	49891	208897	1997-06-06 01:00:00	ssRNA viruses	ssRNA negative-strand viruses	New world arenaviruses				Viruses	Arenaviridae	Arenavirus
15553204	3337	Viruses	species	Lymphocytic choriomeningitis virus	11623	208896	1993-04-24 01:00:00	ssRNA viruses	ssRNA negative-strand viruses	Old world arenaviruses				Viruses	Arenaviridae	Arenavirus
15553207	3337	Viruses	species	Lymphocytic choriomeningitis virus	11623	208896	1993-04-24 01:00:00	ssRNA viruses	ssRNA negative-strand viruses	Old world arenaviruses				Viruses	Arenaviridae	Arenavirus
16033352	3367	Viruses	species	Lassa virus	11620	208896	1993-04-24 01:00:00	ssRNA viruses	ssRNA negative-strand viruses	Old world arenaviruses				Viruses	Arenaviridae	Arenavirus
22651509	3382	Viruses	species	Allpahuayo virus	144752	208897	2001-01-16 12:26:00	ssRNA viruses	ssRNA negative-strand viruses	New world arenaviruses				Viruses	Arenaviridae	Arenavirus
23334585	6680	Viruses	species	Lymphocytic choriomeningitis virus	11623	208896	1993-04-24 01:00:00	ssRNA viruses	ssRNA negative-strand viruses	Old world arenaviruses				Viruses	Arenaviridae	Arenavirus
23334588	3376	Viruses	species	Lymphocytic choriomeningitis virus	11623	208896	1993-04-24 01:00:00	ssRNA viruses	ssRNA negative-strand viruses	Old world arenaviruses				Viruses	Arenaviridae	Arenavirus
23334591	7102	Viruses	species	Tacaribe virus	11631	208897	1993-08-03 01:00:00	ssRNA viruses	ssRNA negative-strand viruses	New world arenaviruses				Viruses	Arenaviridae	Arenavirus
23334594	3432	Viruses	species	Tacaribe virus	11631	208897	1993-08-03 01:00:00	ssRNA viruses	ssRNA negative-strand viruses	New world arenaviruses				Viruses	Arenaviridae	Arenavirus
23343509	3402	Viruses	species	Lassa virus	11620	208896	1993-04-24 01:00:00	ssRNA viruses	ssRNA negative-strand viruses	Old world arenaviruses				Viruses	Arenaviridae	Arenavirus
23343512	7279	Viruses	species	Lassa virus	11620	208896	1993-04-24 01:00:00	ssRNA viruses	ssRNA negative-strand viruses	Old world arenaviruses				Viruses	Arenaviridae	Arenavirus
23452251	110	Viruses	species	Tamiami virus	45223	208897	1996-05-23 01:00:00	ssRNA viruses	ssRNA negative-strand viruses	New world arenaviruses				Viruses	Arenaviridae	Arenavirus
23452267	253	Viruses	species	Bear Canyon virus	192848	208897	2002-10-05 19:00:00	ssRNA viruses	ssRNA negative-strand viruses	New world arenaviruses				Viruses	Arenaviridae	Arenavirus
34365526	7114	Viruses	species	Junin virus	11619	208897	1993-04-21 01:00:00	ssRNA viruses	ssRNA negative-strand viruses	New world arenaviruses				Viruses	Arenaviridae	Arenavirus
34365529	3411	Viruses	species	Junin virus	11619	208897	1993-04-21 01:00:00	ssRNA viruses	ssRNA negative-strand viruses	New world arenaviruses				Viruses	Arenaviridae	Arenavirus
34365532	3439	Viruses	species	Machupo virus	11628	208897	1993-04-21 01:00:00	ssRNA viruses	ssRNA negative-strand viruses	New world arenaviruses				Viruses	Arenaviridae	Arenavirus
34365535	7196	Viruses	species	Machupo virus	11628	208897	1993-04-21 01:00:00	ssRNA viruses	ssRNA negative-strand viruses	New world arenaviruses				Viruses	Arenaviridae	Arenavirus
34365538	3343	Viruses	species	Guanarito virus	45219	208897	1996-05-23 01:00:00	ssRNA viruses	ssRNA negative-strand viruses	New world arenaviruses				Viruses	Arenaviridae	Arenavirus
34365541	7081	Viruses	species	Guanarito virus	45219	208897	1996-05-23 01:00:00	ssRNA viruses	ssRNA negative-strand viruses	New world arenaviruses				Viruses	Arenaviridae	Arenavirus
37729909	7227	Viruses	species	Lassa virus	11620	208896	1993-04-24 01:00:00	ssRNA viruses	ssRNA negative-strand viruses	Old world arenaviruses				Viruses	Arenaviridae	Arenavirus
37729930	3257	Viruses	species	Lassa virus	11620	208896	1993-04-24 01:00:00	ssRNA viruses	ssRNA negative-strand viruses	Old world arenaviruses				Viruses	Arenaviridae	Arenavirus
37729933	1008	Viruses	species	Lassa virus	11620	208896	1993-04-24 01:00:00	ssRNA viruses	ssRNA negative-strand viruses	Old world arenaviruses				Viruses	Arenaviridae	Arenavirus
37955035	6736	Viruses	species	Lassa virus	11620	208896	1993-04-24 01:00:00	ssRNA viruses	ssRNA negative-strand viruses	Old world arenaviruses				Viruses	Arenaviridae	Arenavirus
45220432	1099	Viruses	species	Junin virus	11619	208897	1993-04-21 01:00:00	ssRNA viruses	ssRNA negative-strand viruses	New world arenaviruses				Viruses	Arenaviridae	Arenavirus
46373061	3391	Viruses	species	Lassa virus	11620	208896	1993-04-24 01:00:00	ssRNA viruses	ssRNA negative-strand viruses	Old world arenaviruses				Viruses	Arenaviridae	Arenavirus
48095756	110	Viruses	species	Junin virus	11619	208897	1993-04-21 01:00:00	ssRNA viruses	ssRNA negative-strand viruses	New world arenaviruses				Viruses	Arenaviridae	Arenavirus
48696000	3393	Viruses	species	Pirital virus	49891	208897	1997-06-06 01:00:00	ssRNA viruses	ssRNA negative-strand viruses	New world arenaviruses				Viruses	Arenaviridae	Arenavirus
48696024	7089	Viruses	species	Pirital virus	49891	208897	1997-06-06 01:00:00	ssRNA viruses	ssRNA negative-strand viruses	New world arenaviruses				Viruses	Arenaviridae	Arenavirus
49037377	7280	Viruses	species	Lassa virus	11620	208896	1993-04-24 01:00:00	ssRNA viruses	ssRNA negative-strand viruses	Old world arenaviruses				Viruses	Arenaviridae	Arenavirus
49037380	3395	Viruses	species	Lassa virus	11620	208896	1993-04-24 01:00:00	ssRNA viruses	ssRNA negative-strand viruses	Old world arenaviruses				Viruses	Arenaviridae	Arenavirus
49037383	120	Viruses	species	Lassa virus	11620	208896	1993-04-24 01:00:00	ssRNA viruses	ssRNA negative-strand viruses	Old world arenaviruses				Viruses	Arenaviridae	Arenavirus
49037389	7280	Viruses	species	Lassa virus	11620	208896	1993-04-24 01:00:00	ssRNA viruses	ssRNA negative-strand viruses	Old world arenaviruses				Viruses	Arenaviridae	Arenavirus
49037392	3396	Viruses	species	Lassa virus	11620	208896	1993-04-24 01:00:00	ssRNA viruses	ssRNA negative-strand viruses	Old world arenaviruses				Viruses	Arenaviridae	Arenavirus
49037395	3420	Viruses	species	Lassa virus	11620	208896	1993-04-24 01:00:00	ssRNA viruses	ssRNA negative-strand viruses	Old world arenaviruses				Viruses	Arenaviridae	Arenavirus
49037398	3428	Viruses	species	Lassa virus	11620	208896	1993-04-24 01:00:00	ssRNA viruses	ssRNA negative-strand viruses	Old world arenaviruses				Viruses	Arenaviridae	Arenavirus
49037401	3427	Viruses	species	Lassa virus	11620	208896	1993-04-24 01:00:00	ssRNA viruses	ssRNA negative-strand viruses	Old world arenaviruses				Viruses	Arenaviridae	Arenavirus
50916210	3384	Viruses	species	Pirital virus	49891	208897	1997-06-06 01:00:00	ssRNA viruses	ssRNA negative-strand viruses	New world arenaviruses				Viruses	Arenaviridae	Arenavirus
50916222	3378	Viruses	species	Pirital virus	49891	208897	1997-06-06 01:00:00	ssRNA viruses	ssRNA negative-strand viruses	New world arenaviruses				Viruses	Arenaviridae	Arenavirus
50981053	3382	Viruses	species	Pirital virus	49891	208897	1997-06-06 01:00:00	ssRNA viruses	ssRNA negative-strand viruses	New world arenaviruses				Viruses	Arenaviridae	Arenavirus
50981056	3382	Viruses	species	Pirital virus	49891	208897	1997-06-06 01:00:00	ssRNA viruses	ssRNA negative-strand viruses	New world arenaviruses				Viruses	Arenaviridae	Arenavirus
50981059	3382	Viruses	species	Pirital virus	49891	208897	1997-06-06 01:00:00	ssRNA viruses	ssRNA negative-strand viruses	New world arenaviruses				Viruses	Arenaviridae	Arenavirus
50981062	3390	Viruses	species	Pirital virus	49891	208897	1997-06-06 01:00:00	ssRNA viruses	ssRNA negative-strand viruses	New world arenaviruses				Viruses	Arenaviridae	Arenavirus
52627076	7133	Viruses	species	Sabia virus	45709	208897	1996-08-08 01:00:00	ssRNA viruses	ssRNA negative-strand viruses	New world arenaviruses				Viruses	Arenaviridae	Arenavirus
52627079	3366	Viruses	species	Sabia virus	45709	208897	1996-08-08 01:00:00	ssRNA viruses	ssRNA negative-strand viruses	New world arenaviruses				Viruses	Arenaviridae	Arenavirus
55733698	3419	Viruses	species	Pichinde virus	11630	208897	1993-08-02 01:00:00	ssRNA viruses	ssRNA negative-strand viruses	New world arenaviruses				Viruses	Arenaviridae	Arenavirus
55775706	6997	Viruses	species	Pichinde virus	11630	208897	1993-08-02 01:00:00	ssRNA viruses	ssRNA negative-strand viruses	New world arenaviruses				Viruses	Arenaviridae	Arenavirus
56699498	7271	Viruses	species	Mopeia Lassa virus reassortant 29	300180	483045	2004-11-15 18:03:54	ssRNA viruses	ssRNA negative-strand viruses	Old world arenaviruses	unclassified Old world arenaviruses			Viruses	Arenaviridae	Arenavirus
56699501	3402	Viruses	species	Mopeia Lassa virus reassortant 29	300180	483045	2004-11-15 18:03:54	ssRNA viruses	ssRNA negative-strand viruses	Old world arenaviruses	unclassified Old world arenaviruses			Viruses	Arenaviridae	Arenavirus
56699504	7271	Viruses	no rank	Mopeia virus AN20410	300175	11629	2004-11-15 18:03:54	ssRNA viruses	ssRNA negative-strand viruses	Old world arenaviruses				Viruses	Arenaviridae	Arenavirus	Mopeia virus
56699507	3427	Viruses	no rank	Mopeia virus AN20410	300175	11629	2004-11-15 18:03:54	ssRNA viruses	ssRNA negative-strand viruses	Old world arenaviruses				Viruses	Arenaviridae	Arenavirus	Mopeia virus
61655718	7228	Viruses	species	Lymphocytic choriomeningitis virus	11623	208896	1993-04-24 01:00:00	ssRNA viruses	ssRNA negative-strand viruses	Old world arenaviruses				Viruses	Arenaviridae	Arenavirus
71089856	3048	Viruses	species	Lymphocytic choriomeningitis virus	11623	208896	1993-04-24 01:00:00	ssRNA viruses	ssRNA negative-strand viruses	Old world arenaviruses				Viruses	Arenaviridae	Arenavirus
82659700	3368	Viruses	species	Lymphocytic choriomeningitis virus	11623	208896	1993-04-24 01:00:00	ssRNA viruses	ssRNA negative-strand viruses	Old world arenaviruses				Viruses	Arenaviridae	Arenavirus
82659703	7216	Viruses	species	Lymphocytic choriomeningitis virus	11623	208896	1993-04-24 01:00:00	ssRNA viruses	ssRNA negative-strand viruses	Old world arenaviruses				Viruses	Arenaviridae	Arenavirus
85542276	3384	Viruses	species	Mopeia virus	11629	208896	1993-08-02 01:00:00	ssRNA viruses	ssRNA negative-strand viruses	Old world arenaviruses				Viruses	Arenaviridae	Arenavirus
85542279	7242	Viruses	species	Mopeia virus	11629	208896	1993-08-02 01:00:00	ssRNA viruses	ssRNA negative-strand viruses	Old world arenaviruses				Viruses	Arenaviridae	Arenavirus
86440167	641	Viruses	species	Lymphocytic choriomeningitis virus	11623	208896	1993-04-24 01:00:00	ssRNA viruses	ssRNA negative-strand viruses	Old world arenaviruses				Viruses	Arenaviridae	Arenavirus
89885729	3380	Viruses	species	Mobala virus	55097	208896	1997-11-27	ssRNA viruses	ssRNA negative-strand viruses	Old world arenaviruses				Viruses	Arenaviridae	Arenavirus
89902995	7316	Viruses	species	Ippy virus	55096	208896	1997-11-27	ssRNA viruses	ssRNA negative-strand viruses	Old world arenaviruses				Viruses	Arenaviridae	Arenavirus
89902998	3366	Viruses	species	Ippy virus	55096	208896	1997-11-27	ssRNA viruses	ssRNA negative-strand viruses	Old world arenaviruses				Viruses	Arenaviridae	Arenavirus
89903001	7325	Viruses	species	Mobala virus	55097	208896	1997-11-27	ssRNA viruses	ssRNA negative-strand viruses	Old world arenaviruses				Viruses	Arenaviridae	Arenavirus
108743534	3381	Viruses	species	Lymphocytic choriomeningitis virus	11623	208896	1993-04-24 01:00:00	ssRNA viruses	ssRNA negative-strand viruses	Old world arenaviruses				Viruses	Arenaviridae	Arenavirus
108743537	3381	Viruses	species	Lymphocytic choriomeningitis virus	11623	208896	1993-04-24 01:00:00	ssRNA viruses	ssRNA negative-strand viruses	Old world arenaviruses				Viruses	Arenaviridae	Arenavirus
115383194	3375	Viruses	species	Lymphocytic choriomeningitis virus	11623	208896	1993-04-24 01:00:00	ssRNA viruses	ssRNA negative-strand viruses	Old world arenaviruses				Viruses	Arenaviridae	Arenavirus
115383197	7219	Viruses	species	Lymphocytic choriomeningitis virus	11623	208896	1993-04-24 01:00:00	ssRNA viruses	ssRNA negative-strand viruses	Old world arenaviruses				Viruses	Arenaviridae	Arenavirus
115383200	3376	Viruses	species	Lymphocytic choriomeningitis virus	11623	208896	1993-04-24 01:00:00	ssRNA viruses	ssRNA negative-strand viruses	Old world arenaviruses				Viruses	Arenaviridae	Arenavirus
115383203	7229	Viruses	species	Lymphocytic choriomeningitis virus	11623	208896	1993-04-24 01:00:00	ssRNA viruses	ssRNA negative-strand viruses	Old world arenaviruses				Viruses	Arenaviridae	Arenavirus
115383206	3341	Viruses	species	Lymphocytic choriomeningitis virus	11623	208896	1993-04-24 01:00:00	ssRNA viruses	ssRNA negative-strand viruses	Old world arenaviruses				Viruses	Arenaviridae	Arenavirus
115383209	7223	Viruses	species	Lymphocytic choriomeningitis virus	11623	208896	1993-04-24 01:00:00	ssRNA viruses	ssRNA negative-strand viruses	Old world arenaviruses				Viruses	Arenaviridae	Arenavirus
115510973	1018	Viruses	species	Junin virus	11619	208897	1993-04-21 01:00:00	ssRNA viruses	ssRNA negative-strand viruses	New world arenaviruses				Viruses	Arenaviridae	Arenavirus
155733523	3180	Viruses	species	Pichinde virus	11630	208897	1993-08-02 01:00:00	ssRNA viruses	ssRNA negative-strand viruses	New world arenaviruses				Viruses	Arenaviridae	Arenavirus
155733526	6964	Viruses	species	Pichinde virus	11630	208897	1993-08-02 01:00:00	ssRNA viruses	ssRNA negative-strand viruses	New world arenaviruses				Viruses	Arenaviridae	Arenavirus
155733529	3091	Viruses	species	Pichinde virus	11630	208897	1993-08-02 01:00:00	ssRNA viruses	ssRNA negative-strand viruses	New world arenaviruses				Viruses	Arenaviridae	Arenavirus
156103993	6920	Viruses	species	Pichinde virus	11630	208897	1993-08-02 01:00:00	ssRNA viruses	ssRNA negative-strand viruses	New world arenaviruses				Viruses	Arenaviridae	Arenavirus
158726684	6631	Viruses	species	Lymphocytic choriomeningitis virus	11623	208896	1993-04-24 01:00:00	ssRNA viruses	ssRNA negative-strand viruses	Old world arenaviruses				Viruses	Arenaviridae	Arenavirus
159461056	3341	Viruses	no rank	North American arenavirus	481887	46919	2008-04-28 18:00:30	ssRNA viruses	ssRNA negative-strand viruses	New world arenaviruses				Viruses	Arenaviridae	Arenavirus	Whitewater Arroyo virus
159461059	3329	Viruses	no rank	North American arenavirus	481887	46919	2008-04-28 18:00:30	ssRNA viruses	ssRNA negative-strand viruses	New world arenaviruses				Viruses	Arenaviridae	Arenavirus	Whitewater Arroyo virus
159461062	3318	Viruses	no rank	North American arenavirus	481887	46919	2008-04-28 18:00:30	ssRNA viruses	ssRNA negative-strand viruses	New world arenaviruses				Viruses	Arenaviridae	Arenavirus	Whitewater Arroyo virus
164519644	110	Viruses	species	Junin virus	11619	208897	1993-04-21 01:00:00	ssRNA viruses	ssRNA negative-strand viruses	New world arenaviruses				Viruses	Arenaviridae	Arenavirus
164607193	3535	Viruses	species	Oliveros virus	42764	208897	1996-03-25	ssRNA viruses	ssRNA negative-strand viruses	New world arenaviruses				Viruses	Arenaviridae	Arenavirus
164607196	7184	Viruses	species	Oliveros virus	42764	208897	1996-03-25	ssRNA viruses	ssRNA negative-strand viruses	New world arenaviruses				Viruses	Arenaviridae	Arenavirus
164607199	7046	Viruses	species	Amapari virus	45218	208897	1996-05-23 01:00:00	ssRNA viruses	ssRNA negative-strand viruses	New world arenaviruses				Viruses	Arenaviridae	Arenavirus
164607202	7053	Viruses	species	Allpahuayo virus	144752	208897	2001-01-16 12:26:00	ssRNA viruses	ssRNA negative-strand viruses	New world arenaviruses				Viruses	Arenaviridae	Arenavirus
164607205	7102	Viruses	species	Bear Canyon virus	192848	208897	2002-10-05 19:00:00	ssRNA viruses	ssRNA negative-strand viruses	New world arenaviruses				Viruses	Arenaviridae	Arenavirus
164607208	3339	Viruses	species	Bear Canyon virus	192848	208897	2002-10-05 19:00:00	ssRNA viruses	ssRNA negative-strand viruses	New world arenaviruses				Viruses	Arenaviridae	Arenavirus
164607211	7106	Viruses	species	Cupixi virus	208899	208897	2002-10-05 19:00:00	ssRNA viruses	ssRNA negative-strand viruses	New world arenaviruses				Viruses	Arenaviridae	Arenavirus
164607214	3332	Viruses	species	Cupixi virus	208899	208897	2002-10-05 19:00:00	ssRNA viruses	ssRNA negative-strand viruses	New world arenaviruses				Viruses	Arenaviridae	Arenavirus
164682561	3341	Viruses	species	Amapari virus	45218	208897	1996-05-23 01:00:00	ssRNA viruses	ssRNA negative-strand viruses	New world arenaviruses				Viruses	Arenaviridae	Arenavirus
164682564	3343	Viruses	species	Allpahuayo virus	144752	208897	2001-01-16 12:26:00	ssRNA viruses	ssRNA negative-strand viruses	New world arenaviruses				Viruses	Arenaviridae	Arenavirus
169641150	3374	Viruses	species	Lymphocytic choriomeningitis virus	11623	208896	1993-04-24 01:00:00	ssRNA viruses	ssRNA negative-strand viruses	Old world arenaviruses				Viruses	Arenaviridae	Arenavirus
169641153	7162	Viruses	species	Lymphocytic choriomeningitis virus	11623	208896	1993-04-24 01:00:00	ssRNA viruses	ssRNA negative-strand viruses	Old world arenaviruses				Viruses	Arenaviridae	Arenavirus
169641156	3374	Viruses	species	Lymphocytic choriomeningitis virus	11623	208896	1993-04-24 01:00:00	ssRNA viruses	ssRNA negative-strand viruses	Old world arenaviruses				Viruses	Arenaviridae	Arenavirus
169641159	7162	Viruses	species	Lymphocytic choriomeningitis virus	11623	208896	1993-04-24 01:00:00	ssRNA viruses	ssRNA negative-strand viruses	Old world arenaviruses				Viruses	Arenaviridae	Arenavirus
172088171	3357	Viruses	species	Chapare virus	499556	208897	2008-04-03 18:00:29	ssRNA viruses	ssRNA negative-strand viruses	New world arenaviruses				Viruses	Arenaviridae	Arenavirus
172088174	7107	Viruses	species	Chapare virus	499556	208897	2008-04-03 18:00:29	ssRNA viruses	ssRNA negative-strand viruses	New world arenaviruses				Viruses	Arenaviridae	Arenavirus
186970538	3274	Viruses	no rank	Arenavirus AV 96010025	523743	46919	2008-07-30 18:00:21	ssRNA viruses	ssRNA negative-strand viruses	New world arenaviruses				Viruses	Arenaviridae	Arenavirus	Whitewater Arroyo virus
186970541	3488	Viruses	species	Tamiami virus	45223	208897	1996-05-23 01:00:00	ssRNA viruses	ssRNA negative-strand viruses	New world arenaviruses				Viruses	Arenaviridae	Arenavirus
187384857	7128	Viruses	species	Whitewater Arroyo virus	46919	208897	1996-10-18 01:00:00	ssRNA viruses	ssRNA negative-strand viruses	New world arenaviruses				Viruses	Arenaviridae	Arenavirus
188531114	7141	Viruses	species	Tamiami virus	45223	208897	1996-05-23 01:00:00	ssRNA viruses	ssRNA negative-strand viruses	New world arenaviruses				Viruses	Arenaviridae	Arenavirus
188531117	3316	Viruses	species	Whitewater Arroyo virus	46919	208897	1996-10-18 01:00:00	ssRNA viruses	ssRNA negative-strand viruses	New world arenaviruses				Viruses	Arenaviridae	Arenavirus
188531120	7132	Viruses	species	Whitewater Arroyo virus	46919	208897	1996-10-18 01:00:00	ssRNA viruses	ssRNA negative-strand viruses	New world arenaviruses				Viruses	Arenaviridae	Arenavirus
188572141	3533	Viruses	species	Tamiami virus	45223	208897	1996-05-23 01:00:00	ssRNA viruses	ssRNA negative-strand viruses	New world arenaviruses				Viruses	Arenaviridae	Arenavirus
189017183	3382	Viruses	species	Pirital virus	49891	208897	1997-06-06 01:00:00	ssRNA viruses	ssRNA negative-strand viruses	New world arenaviruses				Viruses	Arenaviridae	Arenavirus
189026268	3410	Viruses	species	Flexal virus	45220	208897	1996-05-23 01:00:00	ssRNA viruses	ssRNA negative-strand viruses	New world arenaviruses				Viruses	Arenaviridae	Arenavirus
189026271	7038	Viruses	species	Flexal virus	45220	208897	1996-05-23 01:00:00	ssRNA viruses	ssRNA negative-strand viruses	New world arenaviruses				Viruses	Arenaviridae	Arenavirus
189026274	3474	Viruses	species	Latino virus	45221	208897	1996-05-23 01:00:00	ssRNA viruses	ssRNA negative-strand viruses	New world arenaviruses				Viruses	Arenaviridae	Arenavirus
189026277	7174	Viruses	species	Latino virus	45221	208897	1996-05-23 01:00:00	ssRNA viruses	ssRNA negative-strand viruses	New world arenaviruses				Viruses	Arenaviridae	Arenavirus
189026280	7088	Viruses	species	Parana virus	45222	208897	1996-05-23 01:00:00	ssRNA viruses	ssRNA negative-strand viruses	New world arenaviruses				Viruses	Arenaviridae	Arenavirus
189043026	3406	Viruses	species	Parana virus	45222	208897	1996-05-23 01:00:00	ssRNA viruses	ssRNA negative-strand viruses	New world arenaviruses				Viruses	Arenaviridae	Arenavirus
209361677	3326	Viruses	no rank	Arenavirus H0380005	568065	46919	2011-12-02 18:00:55	ssRNA viruses	ssRNA negative-strand viruses	New world arenaviruses				Viruses	Arenaviridae	Arenavirus	Whitewater Arroyo virus
228015596	3366	Viruses	species	Lymphocytic choriomeningitis virus	11623	208896	1993-04-24 01:00:00	ssRNA viruses	ssRNA negative-strand viruses	Old world arenaviruses				Viruses	Arenaviridae	Arenavirus
228015599	3361	Viruses	species	Lymphocytic choriomeningitis virus	11623	208896	1993-04-24 01:00:00	ssRNA viruses	ssRNA negative-strand viruses	Old world arenaviruses				Viruses	Arenaviridae	Arenavirus
228015602	3364	Viruses	species	Lymphocytic choriomeningitis virus	11623	208896	1993-04-24 01:00:00	ssRNA viruses	ssRNA negative-strand viruses	Old world arenaviruses				Viruses	Arenaviridae	Arenavirus
238890537	3189	Viruses	species	Lujo virus	649188	11618	2009-06-04 18:00:35	ssRNA viruses	ssRNA negative-strand viruses					Viruses	Arenaviridae	Arenavirus
238890540	7163	Viruses	species	Lujo virus	649188	11618	2009-06-04 18:00:35	ssRNA viruses	ssRNA negative-strand viruses					Viruses	Arenaviridae	Arenavirus
255237668	3383	Viruses	species	Morogoro virus	573900	483045	2009-07-31 18:00:37	ssRNA viruses	ssRNA negative-strand viruses	Old world arenaviruses	unclassified Old world arenaviruses			Viruses	Arenaviridae	Arenavirus
255237729	7207	Viruses	species	Morogoro virus	573900	483045	2009-07-31 18:00:37	ssRNA viruses	ssRNA negative-strand viruses	Old world arenaviruses	unclassified Old world arenaviruses			Viruses	Arenaviridae	Arenavirus
308097144	7124	Viruses	species	Lymphocytic choriomeningitis virus	11623	208896	1993-04-24 01:00:00	ssRNA viruses	ssRNA negative-strand viruses	Old world arenaviruses				Viruses	Arenaviridae	Arenavirus
308097146	3394	Viruses	species	Lymphocytic choriomeningitis virus	11623	208896	1993-04-24 01:00:00	ssRNA viruses	ssRNA negative-strand viruses	Old world arenaviruses				Viruses	Arenaviridae	Arenavirus
316997265	7203	Viruses	species	Lymphocytic choriomeningitis virus	11623	208896	1993-04-24 01:00:00	ssRNA viruses	ssRNA negative-strand viruses	Old world arenaviruses				Viruses	Arenaviridae	Arenavirus
323903305	120	Viruses	species	Lassa virus	11620	208896	1993-04-24 01:00:00	ssRNA viruses	ssRNA negative-strand viruses	Old world arenaviruses				Viruses	Arenaviridae	Arenavirus
323903308	120	Viruses	species	Lassa virus	11620	208896	1993-04-24 01:00:00	ssRNA viruses	ssRNA negative-strand viruses	Old world arenaviruses				Viruses	Arenaviridae	Arenavirus
349731808	3337	Viruses	species	Luna virus	883876	11618	2011-10-08 18:01:12	ssRNA viruses	ssRNA negative-strand viruses					Viruses	Arenaviridae	Arenavirus
349731811	7220	Viruses	species	Luna virus	883876	11618	2011-10-08 18:01:12	ssRNA viruses	ssRNA negative-strand viruses					Viruses	Arenaviridae	Arenavirus
354681507	7267	Viruses	species	Lassa virus	11620	208896	1993-04-24 01:00:00	ssRNA viruses	ssRNA negative-strand viruses	Old world arenaviruses				Viruses	Arenaviridae	Arenavirus
354681510	3392	Viruses	species	Lassa virus	11620	208896	1993-04-24 01:00:00	ssRNA viruses	ssRNA negative-strand viruses	Old world arenaviruses				Viruses	Arenaviridae	Arenavirus
356491217	3377	Viruses	species	Luna virus	883876	11618	2011-10-08 18:01:12	ssRNA viruses	ssRNA negative-strand viruses					Viruses	Arenaviridae	Arenavirus
356491220	7230	Viruses	species	Luna virus	883876	11618	2011-10-08 18:01:12	ssRNA viruses	ssRNA negative-strand viruses					Viruses	Arenaviridae	Arenavirus
365976989	4383	Viruses	species	Machupo virus	11628	208897	1993-04-21 01:00:00	ssRNA viruses	ssRNA negative-strand viruses	New world arenaviruses				Viruses	Arenaviridae	Arenavirus
365976992	991	Viruses	species	Machupo virus	11628	208897	1993-04-21 01:00:00	ssRNA viruses	ssRNA negative-strand viruses	New world arenaviruses				Viruses	Arenaviridae	Arenavirus
373839517	3375	Viruses	species	Lymphocytic choriomeningitis virus	11623	208896	1993-04-24 01:00:00	ssRNA viruses	ssRNA negative-strand viruses	Old world arenaviruses				Viruses	Arenaviridae	Arenavirus
375333704	110	Viruses	species	Junin virus	11619	208897	1993-04-21 01:00:00	ssRNA viruses	ssRNA negative-strand viruses	New world arenaviruses				Viruses	Arenaviridae	Arenavirus
383212108	3374	Viruses	species	Lymphocytic choriomeningitis virus	11623	208896	1993-04-24 01:00:00	ssRNA viruses	ssRNA negative-strand viruses	Old world arenaviruses				Viruses	Arenaviridae	Arenavirus
383212111	3358	Viruses	species	Lymphocytic choriomeningitis virus	11623	208896	1993-04-24 01:00:00	ssRNA viruses	ssRNA negative-strand viruses	Old world arenaviruses				Viruses	Arenaviridae	Arenavirus
383212114	3380	Viruses	species	Lymphocytic choriomeningitis virus	11623	208896	1993-04-24 01:00:00	ssRNA viruses	ssRNA negative-strand viruses	Old world arenaviruses				Viruses	Arenaviridae	Arenavirus
383212117	7232	Viruses	species	Lymphocytic choriomeningitis virus	11623	208896	1993-04-24 01:00:00	ssRNA viruses	ssRNA negative-strand viruses	Old world arenaviruses				Viruses	Arenaviridae	Arenavirus
383212120	7230	Viruses	species	Lymphocytic choriomeningitis virus	11623	208896	1993-04-24 01:00:00	ssRNA viruses	ssRNA negative-strand viruses	Old world arenaviruses				Viruses	Arenaviridae	Arenavirus
383212123	7241	Viruses	species	Lymphocytic choriomeningitis virus	11623	208896	1993-04-24 01:00:00	ssRNA viruses	ssRNA negative-strand viruses	Old world arenaviruses				Viruses	Arenaviridae	Arenavirus
383385888	7204	Viruses	species	Lymphocytic choriomeningitis virus	11623	208896	1993-04-24 01:00:00	ssRNA viruses	ssRNA negative-strand viruses	Old world arenaviruses				Viruses	Arenaviridae	Arenavirus
383385891	3327	Viruses	species	Lymphocytic choriomeningitis virus	11623	208896	1993-04-24 01:00:00	ssRNA viruses	ssRNA negative-strand viruses	Old world arenaviruses				Viruses	Arenaviridae	Arenavirus
399125339	243	Viruses	species	Lujo virus	649188	11618	2009-06-04 18:00:35	ssRNA viruses	ssRNA negative-strand viruses					Viruses	Arenaviridae	Arenavirus
399125345	292	Viruses	species	Lujo virus	649188	11618	2009-06-04 18:00:35	ssRNA viruses	ssRNA negative-strand viruses					Viruses	Arenaviridae	Arenavirus
399769793	3373	Viruses	species	Luna virus	883876	11618	2011-10-08 18:01:12	ssRNA viruses	ssRNA negative-strand viruses					Viruses	Arenaviridae	Arenavirus
399769796	7287	Viruses	species	Luna virus	883876	11618	2011-10-08 18:01:12	ssRNA viruses	ssRNA negative-strand viruses					Viruses	Arenaviridae	Arenavirus
401829632	3368	Viruses	species	CAS virus	1223561	208898	2012-08-21 18:00:58	ssRNA viruses	ssRNA negative-strand viruses	unclassified Arenaviridae				Viruses	Arenaviridae
401829635	6922	Viruses	species	Golden Gate virus	1223562	208898	2012-08-21 18:00:58	ssRNA viruses	ssRNA negative-strand viruses	unclassified Arenaviridae				Viruses	Arenaviridae
401829638	3482	Viruses	species	Golden Gate virus	1223562	208898	2012-08-21 18:00:58	ssRNA viruses	ssRNA negative-strand viruses	unclassified Arenaviridae				Viruses	Arenaviridae
401829641	6812	Viruses	species	CAS virus	1223561	208898	2012-08-21 18:00:58	ssRNA viruses	ssRNA negative-strand viruses	unclassified Arenaviridae				Viruses	Arenaviridae
404312010	2997	Viruses	species	Luna virus	883876	11618	2011-10-08 18:01:12	ssRNA viruses	ssRNA negative-strand viruses					Viruses	Arenaviridae	Arenavirus
404312013	7217	Viruses	species	Luna virus	883876	11618	2011-10-08 18:01:12	ssRNA viruses	ssRNA negative-strand viruses					Viruses	Arenaviridae	Arenavirus
407326374	3376	Viruses	species	Luna virus	883876	11618	2011-10-08 18:01:12	ssRNA viruses	ssRNA negative-strand viruses					Viruses	Arenaviridae	Arenavirus
407326377	5401	Viruses	species	Luna virus	883876	11618	2011-10-08 18:01:12	ssRNA viruses	ssRNA negative-strand viruses					Viruses	Arenaviridae	Arenavirus
408354100	3419	Viruses	species	Lunk virus NKS-1	1134579	483045	2012-03-29 18:00:54	ssRNA viruses	ssRNA negative-strand viruses	Old world arenaviruses	unclassified Old world arenaviruses			Viruses	Arenaviridae	Arenavirus
408354103	7195	Viruses	species	Lunk virus NKS-1	1134579	483045	2012-03-29 18:00:54	ssRNA viruses	ssRNA negative-strand viruses	Old world arenaviruses	unclassified Old world arenaviruses			Viruses	Arenaviridae	Arenavirus
939776	13521	Viruses	species	Lactate dehydrogenase-elevating virus	11048	11046	1993-07-26 01:00:00	ssRNA viruses	ssRNA positive-strand viruses, no DNA stage					Viruses	Arteriviridae	Arterivirus		Nidovirales
7650192	4244	Viruses	species	Porcine reproductive and respiratory syndrome virus	28344	11046	1994-01-01	ssRNA viruses	ssRNA positive-strand viruses, no DNA stage					Viruses	Arteriviridae	Arterivirus		Nidovirales
9627971	14104	Viruses	species	Lactate dehydrogenase-elevating virus	11048	11046	1993-07-26 01:00:00	ssRNA viruses	ssRNA positive-strand viruses, no DNA stage					Viruses	Arteriviridae	Arterivirus		Nidovirales
9630807	15428	Viruses	species	Porcine reproductive and respiratory syndrome virus	28344	11046	1994-01-01	ssRNA viruses	ssRNA positive-strand viruses, no DNA stage					Viruses	Arteriviridae	Arterivirus		Nidovirales
11125727	15111	Viruses	no rank	Lelystad virus	11049	28344	1993-08-02 01:00:00	ssRNA viruses	ssRNA positive-strand viruses, no DNA stage					Viruses	Arteriviridae	Arterivirus	Porcine reproductive and respiratory syndrome virus	Nidovirales
12240324	167	Viruses	species	Porcine reproductive and respiratory syndrome virus	28344	11046	1994-01-01	ssRNA viruses	ssRNA positive-strand viruses, no DNA stage					Viruses	Arteriviridae	Arterivirus		Nidovirales
12744849	8112	Viruses	species	Porcine reproductive and respiratory syndrome virus	28344	11046	1994-01-01	ssRNA viruses	ssRNA positive-strand viruses, no DNA stage					Viruses	Arteriviridae	Arterivirus		Nidovirales
14250956	8256	Viruses	species	Porcine reproductive and respiratory syndrome virus	28344	11046	1994-01-01	ssRNA viruses	ssRNA positive-strand viruses, no DNA stage					Viruses	Arteriviridae	Arterivirus		Nidovirales
14583260	12704	Viruses	species	Equine arteritis virus	11047	11046	1996-03-27	ssRNA viruses	ssRNA positive-strand viruses, no DNA stage					Viruses	Arteriviridae	Arterivirus		Nidovirales
15426259	15717	Viruses	species	Simian hemorrhagic fever virus	38143	11046	1995-03-07	ssRNA viruses	ssRNA positive-strand viruses, no DNA stage					Viruses	Arteriviridae	Arterivirus		Nidovirales
20271246	7867	Viruses	species	Porcine reproductive and respiratory syndrome virus	28344	11046	1994-01-01	ssRNA viruses	ssRNA positive-strand viruses, no DNA stage					Viruses	Arteriviridae	Arterivirus		Nidovirales
22658020	144	Viruses	species	Porcine reproductive and respiratory syndrome virus	28344	11046	1994-01-01	ssRNA viruses	ssRNA positive-strand viruses, no DNA stage					Viruses	Arteriviridae	Arterivirus		Nidovirales
25361009	10960	Viruses	no rank	PRRSV HB-1(sh)/2002	300563	28344	2004-11-10 18:03:41	ssRNA viruses	ssRNA positive-strand viruses, no DNA stage					Viruses	Arteriviridae	Arterivirus	Porcine reproductive and respiratory syndrome virus	Nidovirales
27549163	111	Viruses	species	Porcine reproductive and respiratory syndrome virus	28344	11046	1994-01-01	ssRNA viruses	ssRNA positive-strand viruses, no DNA stage					Viruses	Arteriviridae	Arterivirus		Nidovirales
31747018	11831	Viruses	no rank	PRRSV HB-2(sh)/2002	300562	28344	2004-11-10 18:03:41	ssRNA viruses	ssRNA positive-strand viruses, no DNA stage					Viruses	Arteriviridae	Arterivirus	Porcine reproductive and respiratory syndrome virus	Nidovirales
38146324	15047	Viruses	species	Porcine reproductive and respiratory syndrome virus	28344	11046	1994-01-01	ssRNA viruses	ssRNA positive-strand viruses, no DNA stage					Viruses	Arteriviridae	Arterivirus		Nidovirales
38230270	11808	Viruses	species	Equine arteritis virus	11047	11046	1996-03-27	ssRNA viruses	ssRNA positive-strand viruses, no DNA stage					Viruses	Arteriviridae	Arterivirus		Nidovirales
38230280	11721	Viruses	species	Equine arteritis virus	11047	11046	1996-03-27	ssRNA viruses	ssRNA positive-strand viruses, no DNA stage					Viruses	Arteriviridae	Arterivirus		Nidovirales
40646796	9227	Viruses	species	Porcine reproductive and respiratory syndrome virus	28344	11046	1994-01-01	ssRNA viruses	ssRNA positive-strand viruses, no DNA stage					Viruses	Arteriviridae	Arterivirus		Nidovirales
45360239	9204	Viruses	species	Porcine reproductive and respiratory syndrome virus	28344	11046	1994-01-01	ssRNA viruses	ssRNA positive-strand viruses, no DNA stage					Viruses	Arteriviridae	Arterivirus		Nidovirales
46519708	131	Viruses	species	Porcine reproductive and respiratory syndrome virus	28344	11046	1994-01-01	ssRNA viruses	ssRNA positive-strand viruses, no DNA stage					Viruses	Arteriviridae	Arterivirus		Nidovirales
51094057	15146	Viruses	no rank	PRRSV LV4.2.1	288959	11049	2004-10-02 18:04:12	ssRNA viruses	ssRNA positive-strand viruses, no DNA stage	Lelystad virus				Viruses	Arteriviridae	Arterivirus	Porcine reproductive and respiratory syndrome virus	Nidovirales
51980219	131	Viruses	species	Porcine reproductive and respiratory syndrome virus	28344	11046	1994-01-01	ssRNA viruses	ssRNA positive-strand viruses, no DNA stage					Viruses	Arteriviridae	Arterivirus		Nidovirales
78064559	13313	Viruses	species	Porcine reproductive and respiratory syndrome virus	28344	11046	1994-01-01	ssRNA viruses	ssRNA positive-strand viruses, no DNA stage					Viruses	Arteriviridae	Arterivirus		Nidovirales
78064568	12808	Viruses	species	Porcine reproductive and respiratory syndrome virus	28344	11046	1994-01-01	ssRNA viruses	ssRNA positive-strand viruses, no DNA stage					Viruses	Arteriviridae	Arterivirus		Nidovirales
94450757	4830	Viruses	species	Porcine reproductive and respiratory syndrome virus	28344	11046	1994-01-01	ssRNA viruses	ssRNA positive-strand viruses, no DNA stage					Viruses	Arteriviridae	Arterivirus		Nidovirales
99082872	15047	Viruses	species	Porcine reproductive and respiratory syndrome virus	28344	11046	1994-01-01	ssRNA viruses	ssRNA positive-strand viruses, no DNA stage					Viruses	Arteriviridae	Arterivirus		Nidovirales
110588840	4234	Viruses	species	Porcine reproductive and respiratory syndrome virus	28344	11046	1994-01-01	ssRNA viruses	ssRNA positive-strand viruses, no DNA stage					Viruses	Arteriviridae	Arterivirus		Nidovirales
112821997	14943	Viruses	species	Porcine reproductive and respiratory syndrome virus	28344	11046	1994-01-01	ssRNA viruses	ssRNA positive-strand viruses, no DNA stage					Viruses	Arteriviridae	Arterivirus		Nidovirales
116006721	9556	Viruses	species	Porcine reproductive and respiratory syndrome virus	28344	11046	1994-01-01	ssRNA viruses	ssRNA positive-strand viruses, no DNA stage					Viruses	Arteriviridae	Arterivirus		Nidovirales
118140107	11707	Viruses	species	Porcine reproductive and respiratory syndrome virus	28344	11046	1994-01-01	ssRNA viruses	ssRNA positive-strand viruses, no DNA stage					Viruses	Arteriviridae	Arterivirus		Nidovirales
119068009	11836	Viruses	species	Porcine reproductive and respiratory syndrome virus	28344	11046	1994-01-01	ssRNA viruses	ssRNA positive-strand viruses, no DNA stage					Viruses	Arteriviridae	Arterivirus		Nidovirales
119068027	11309	Viruses	species	Porcine reproductive and respiratory syndrome virus	28344	11046	1994-01-01	ssRNA viruses	ssRNA positive-strand viruses, no DNA stage					Viruses	Arteriviridae	Arterivirus		Nidovirales
119068053	11957	Viruses	species	Porcine reproductive and respiratory syndrome virus	28344	11046	1994-01-01	ssRNA viruses	ssRNA positive-strand viruses, no DNA stage					Viruses	Arteriviridae	Arterivirus		Nidovirales
119721016	103	Viruses	species	Porcine reproductive and respiratory syndrome virus	28344	11046	1994-01-01	ssRNA viruses	ssRNA positive-strand viruses, no DNA stage					Viruses	Arteriviridae	Arterivirus		Nidovirales
140453646	13600	Viruses	species	Porcine reproductive and respiratory syndrome virus	28344	11046	1994-01-01	ssRNA viruses	ssRNA positive-strand viruses, no DNA stage					Viruses	Arteriviridae	Arterivirus		Nidovirales
143024145	11809	Viruses	species	Porcine reproductive and respiratory syndrome virus	28344	11046	1994-01-01	ssRNA viruses	ssRNA positive-strand viruses, no DNA stage					Viruses	Arteriviridae	Arterivirus		Nidovirales
144704720	13622	Viruses	species	Porcine reproductive and respiratory syndrome virus	28344	11046	1994-01-01	ssRNA viruses	ssRNA positive-strand viruses, no DNA stage					Viruses	Arteriviridae	Arterivirus		Nidovirales
149389578	11518	Viruses	species	Porcine reproductive and respiratory syndrome virus	28344	11046	1994-01-01	ssRNA viruses	ssRNA positive-strand viruses, no DNA stage					Viruses	Arteriviridae	Arterivirus		Nidovirales
149929787	12015	Viruses	species	Porcine reproductive and respiratory syndrome virus	28344	11046	1994-01-01	ssRNA viruses	ssRNA positive-strand viruses, no DNA stage					Viruses	Arteriviridae	Arterivirus		Nidovirales
154089645	12050	Viruses	species	Porcine reproductive and respiratory syndrome virus	28344	11046	1994-01-01	ssRNA viruses	ssRNA positive-strand viruses, no DNA stage					Viruses	Arteriviridae	Arterivirus		Nidovirales
156067187	9237	Viruses	species	Porcine reproductive and respiratory syndrome virus	28344	11046	1994-01-01	ssRNA viruses	ssRNA positive-strand viruses, no DNA stage					Viruses	Arteriviridae	Arterivirus		Nidovirales
156067197	13621	Viruses	species	Porcine reproductive and respiratory syndrome virus	28344	11046	1994-01-01	ssRNA viruses	ssRNA positive-strand viruses, no DNA stage					Viruses	Arteriviridae	Arterivirus		Nidovirales
156067207	13928	Viruses	species	Porcine reproductive and respiratory syndrome virus	28344	11046	1994-01-01	ssRNA viruses	ssRNA positive-strand viruses, no DNA stage					Viruses	Arteriviridae	Arterivirus		Nidovirales
156067217	13592	Viruses	species	Porcine reproductive and respiratory syndrome virus	28344	11046	1994-01-01	ssRNA viruses	ssRNA positive-strand viruses, no DNA stage					Viruses	Arteriviridae	Arterivirus		Nidovirales
156067227	11909	Viruses	species	Porcine reproductive and respiratory syndrome virus	28344	11046	1994-01-01	ssRNA viruses	ssRNA positive-strand viruses, no DNA stage					Viruses	Arteriviridae	Arterivirus		Nidovirales
156067237	13587	Viruses	species	Porcine reproductive and respiratory syndrome virus	28344	11046	1994-01-01	ssRNA viruses	ssRNA positive-strand viruses, no DNA stage					Viruses	Arteriviridae	Arterivirus		Nidovirales
156067247	13617	Viruses	species	Porcine reproductive and respiratory syndrome virus	28344	11046	1994-01-01	ssRNA viruses	ssRNA positive-strand viruses, no DNA stage					Viruses	Arteriviridae	Arterivirus		Nidovirales
156067257	11821	Viruses	species	Porcine reproductive and respiratory syndrome virus	28344	11046	1994-01-01	ssRNA viruses	ssRNA positive-strand viruses, no DNA stage					Viruses	Arteriviridae	Arterivirus		Nidovirales
156067267	12115	Viruses	species	Porcine reproductive and respiratory syndrome virus	28344	11046	1994-01-01	ssRNA viruses	ssRNA positive-strand viruses, no DNA stage					Viruses	Arteriviridae	Arterivirus		Nidovirales
156067277	13210	Viruses	species	Porcine reproductive and respiratory syndrome virus	28344	11046	1994-01-01	ssRNA viruses	ssRNA positive-strand viruses, no DNA stage					Viruses	Arteriviridae	Arterivirus		Nidovirales
156067287	13069	Viruses	species	Porcine reproductive and respiratory syndrome virus	28344	11046	1994-01-01	ssRNA viruses	ssRNA positive-strand viruses, no DNA stage					Viruses	Arteriviridae	Arterivirus		Nidovirales
156067297	13292	Viruses	species	Porcine reproductive and respiratory syndrome virus	28344	11046	1994-01-01	ssRNA viruses	ssRNA positive-strand viruses, no DNA stage					Viruses	Arteriviridae	Arterivirus		Nidovirales
156067307	12523	Viruses	species	Porcine reproductive and respiratory syndrome virus	28344	11046	1994-01-01	ssRNA viruses	ssRNA positive-strand viruses, no DNA stage					Viruses	Arteriviridae	Arterivirus		Nidovirales
156067317	13589	Viruses	species	Porcine reproductive and respiratory syndrome virus	28344	11046	1994-01-01	ssRNA viruses	ssRNA positive-strand viruses, no DNA stage					Viruses	Arteriviridae	Arterivirus		Nidovirales
156067327	13634	Viruses	species	Porcine reproductive and respiratory syndrome virus	28344	11046	1994-01-01	ssRNA viruses	ssRNA positive-strand viruses, no DNA stage					Viruses	Arteriviridae	Arterivirus		Nidovirales
156067337	764	Viruses	species	Porcine reproductive and respiratory syndrome virus	28344	11046	1994-01-01	ssRNA viruses	ssRNA positive-strand viruses, no DNA stage					Viruses	Arteriviridae	Arterivirus		Nidovirales
156067347	13470	Viruses	species	Porcine reproductive and respiratory syndrome virus	28344	11046	1994-01-01	ssRNA viruses	ssRNA positive-strand viruses, no DNA stage					Viruses	Arteriviridae	Arterivirus		Nidovirales
156067357	13613	Viruses	species	Porcine reproductive and respiratory syndrome virus	28344	11046	1994-01-01	ssRNA viruses	ssRNA positive-strand viruses, no DNA stage					Viruses	Arteriviridae	Arterivirus		Nidovirales
156067367	13921	Viruses	species	Porcine reproductive and respiratory syndrome virus	28344	11046	1994-01-01	ssRNA viruses	ssRNA positive-strand viruses, no DNA stage					Viruses	Arteriviridae	Arterivirus		Nidovirales
156118198	15074	Viruses	species	Porcine reproductive and respiratory syndrome virus	28344	11046	1994-01-01	ssRNA viruses	ssRNA positive-strand viruses, no DNA stage					Viruses	Arteriviridae	Arterivirus		Nidovirales
156181634	11624	Viruses	species	Porcine reproductive and respiratory syndrome virus	28344	11046	1994-01-01	ssRNA viruses	ssRNA positive-strand viruses, no DNA stage					Viruses	Arteriviridae	Arterivirus		Nidovirales
156181643	11574	Viruses	species	Porcine reproductive and respiratory syndrome virus	28344	11046	1994-01-01	ssRNA viruses	ssRNA positive-strand viruses, no DNA stage					Viruses	Arteriviridae	Arterivirus		Nidovirales
156617460	13709	Viruses	species	Porcine reproductive and respiratory syndrome virus	28344	11046	1994-01-01	ssRNA viruses	ssRNA positive-strand viruses, no DNA stage					Viruses	Arteriviridae	Arterivirus		Nidovirales
156617469	10036	Viruses	species	Porcine reproductive and respiratory syndrome virus	28344	11046	1994-01-01	ssRNA viruses	ssRNA positive-strand viruses, no DNA stage					Viruses	Arteriviridae	Arterivirus		Nidovirales
156617487	13109	Viruses	species	Porcine reproductive and respiratory syndrome virus	28344	11046	1994-01-01	ssRNA viruses	ssRNA positive-strand viruses, no DNA stage					Viruses	Arteriviridae	Arterivirus		Nidovirales
156763796	11928	Viruses	species	Porcine reproductive and respiratory syndrome virus	28344	11046	1994-01-01	ssRNA viruses	ssRNA positive-strand viruses, no DNA stage					Viruses	Arteriviridae	Arterivirus		Nidovirales
157043011	12203	Viruses	species	Porcine reproductive and respiratory syndrome virus	28344	11046	1994-01-01	ssRNA viruses	ssRNA positive-strand viruses, no DNA stage					Viruses	Arteriviridae	Arterivirus		Nidovirales
157043020	11744	Viruses	species	Porcine reproductive and respiratory syndrome virus	28344	11046	1994-01-01	ssRNA viruses	ssRNA positive-strand viruses, no DNA stage					Viruses	Arteriviridae	Arterivirus		Nidovirales
157674338	11783	Viruses	species	Porcine reproductive and respiratory syndrome virus	28344	11046	1994-01-01	ssRNA viruses	ssRNA positive-strand viruses, no DNA stage					Viruses	Arteriviridae	Arterivirus		Nidovirales
158452045	12291	Viruses	species	Porcine reproductive and respiratory syndrome virus	28344	11046	1994-01-01	ssRNA viruses	ssRNA positive-strand viruses, no DNA stage					Viruses	Arteriviridae	Arterivirus		Nidovirales
159147374	11821	Viruses	species	Porcine reproductive and respiratory syndrome virus	28344	11046	1994-01-01	ssRNA viruses	ssRNA positive-strand viruses, no DNA stage					Viruses	Arteriviridae	Arterivirus		Nidovirales
159147383	11830	Viruses	species	Porcine reproductive and respiratory syndrome virus	28344	11046	1994-01-01	ssRNA viruses	ssRNA positive-strand viruses, no DNA stage					Viruses	Arteriviridae	Arterivirus		Nidovirales
159507410	11604	Viruses	species	Porcine reproductive and respiratory syndrome virus	28344	11046	1994-01-01	ssRNA viruses	ssRNA positive-strand viruses, no DNA stage					Viruses	Arteriviridae	Arterivirus		Nidovirales
164665281	141	Viruses	species	Porcine reproductive and respiratory syndrome virus	28344	11046	1994-01-01	ssRNA viruses	ssRNA positive-strand viruses, no DNA stage					Viruses	Arteriviridae	Arterivirus		Nidovirales
164665291	352	Viruses	species	Porcine reproductive and respiratory syndrome virus	28344	11046	1994-01-01	ssRNA viruses	ssRNA positive-strand viruses, no DNA stage					Viruses	Arteriviridae	Arterivirus		Nidovirales
164665301	10763	Viruses	species	Porcine reproductive and respiratory syndrome virus	28344	11046	1994-01-01	ssRNA viruses	ssRNA positive-strand viruses, no DNA stage					Viruses	Arteriviridae	Arterivirus		Nidovirales
166361861	12928	Viruses	species	Porcine reproductive and respiratory syndrome virus	28344	11046	1994-01-01	ssRNA viruses	ssRNA positive-strand viruses, no DNA stage					Viruses	Arteriviridae	Arterivirus		Nidovirales
187372767	12004	Viruses	species	Porcine reproductive and respiratory syndrome virus	28344	11046	1994-01-01	ssRNA viruses	ssRNA positive-strand viruses, no DNA stage					Viruses	Arteriviridae	Arterivirus		Nidovirales
188523793	11475	Viruses	species	Porcine reproductive and respiratory syndrome virus	28344	11046	1994-01-01	ssRNA viruses	ssRNA positive-strand viruses, no DNA stage					Viruses	Arteriviridae	Arterivirus		Nidovirales
192806901	10526	Viruses	species	Porcine reproductive and respiratory syndrome virus	28344	11046	1994-01-01	ssRNA viruses	ssRNA positive-strand viruses, no DNA stage					Viruses	Arteriviridae	Arterivirus		Nidovirales
194338900	11360	Viruses	species	Porcine reproductive and respiratory syndrome virus	28344	11046	1994-01-01	ssRNA viruses	ssRNA positive-strand viruses, no DNA stage					Viruses	Arteriviridae	Arterivirus		Nidovirales
194338909	11442	Viruses	species	Porcine reproductive and respiratory syndrome virus	28344	11046	1994-01-01	ssRNA viruses	ssRNA positive-strand viruses, no DNA stage					Viruses	Arteriviridae	Arterivirus		Nidovirales
194591924	11575	Viruses	species	Porcine reproductive and respiratory syndrome virus	28344	11046	1994-01-01	ssRNA viruses	ssRNA positive-strand viruses, no DNA stage					Viruses	Arteriviridae	Arterivirus		Nidovirales
194591933	12003	Viruses	species	Porcine reproductive and respiratory syndrome virus	28344	11046	1994-01-01	ssRNA viruses	ssRNA positive-strand viruses, no DNA stage					Viruses	Arteriviridae	Arterivirus		Nidovirales
194719441	9373	Viruses	species	Porcine reproductive and respiratory syndrome virus	28344	11046	1994-01-01	ssRNA viruses	ssRNA positive-strand viruses, no DNA stage					Viruses	Arteriviridae	Arterivirus		Nidovirales
194740079	11922	Viruses	species	Porcine reproductive and respiratory syndrome virus	28344	11046	1994-01-01	ssRNA viruses	ssRNA positive-strand viruses, no DNA stage					Viruses	Arteriviridae	Arterivirus		Nidovirales
194740088	12509	Viruses	species	Porcine reproductive and respiratory syndrome virus	28344	11046	1994-01-01	ssRNA viruses	ssRNA positive-strand viruses, no DNA stage					Viruses	Arteriviridae	Arterivirus		Nidovirales
194740097	11548	Viruses	species	Porcine reproductive and respiratory syndrome virus	28344	11046	1994-01-01	ssRNA viruses	ssRNA positive-strand viruses, no DNA stage					Viruses	Arteriviridae	Arterivirus		Nidovirales
198385417	11986	Viruses	species	Porcine reproductive and respiratory syndrome virus	28344	11046	1994-01-01	ssRNA viruses	ssRNA positive-strand viruses, no DNA stage					Viruses	Arteriviridae	Arterivirus		Nidovirales
210076738	12222	Viruses	species	Porcine reproductive and respiratory syndrome virus	28344	11046	1994-01-01	ssRNA viruses	ssRNA positive-strand viruses, no DNA stage					Viruses	Arteriviridae	Arterivirus		Nidovirales
210077435	15038	Viruses	species	Porcine reproductive and respiratory syndrome virus	28344	11046	1994-01-01	ssRNA viruses	ssRNA positive-strand viruses, no DNA stage					Viruses	Arteriviridae	Arterivirus		Nidovirales
211907855	11652	Viruses	species	Porcine reproductive and respiratory syndrome virus	28344	11046	1994-01-01	ssRNA viruses	ssRNA positive-strand viruses, no DNA stage					Viruses	Arteriviridae	Arterivirus		Nidovirales
211907864	11491	Viruses	species	Porcine reproductive and respiratory syndrome virus	28344	11046	1994-01-01	ssRNA viruses	ssRNA positive-strand viruses, no DNA stage					Viruses	Arteriviridae	Arterivirus		Nidovirales
211907873	11506	Viruses	species	Porcine reproductive and respiratory syndrome virus	28344	11046	1994-01-01	ssRNA viruses	ssRNA positive-strand viruses, no DNA stage					Viruses	Arteriviridae	Arterivirus		Nidovirales
211907882	11748	Viruses	species	Porcine reproductive and respiratory syndrome virus	28344	11046	1994-01-01	ssRNA viruses	ssRNA positive-strand viruses, no DNA stage					Viruses	Arteriviridae	Arterivirus		Nidovirales
220682964	10868	Viruses	species	Porcine reproductive and respiratory syndrome virus	28344	11046	1994-01-01	ssRNA viruses	ssRNA positive-strand viruses, no DNA stage					Viruses	Arteriviridae	Arterivirus		Nidovirales
224177842	11585	Viruses	species	Porcine reproductive and respiratory syndrome virus	28344	11046	1994-01-01	ssRNA viruses	ssRNA positive-strand viruses, no DNA stage					Viruses	Arteriviridae	Arterivirus		Nidovirales
224177849	11925	Viruses	species	Porcine reproductive and respiratory syndrome virus	28344	11046	1994-01-01	ssRNA viruses	ssRNA positive-strand viruses, no DNA stage					Viruses	Arteriviridae	Arterivirus		Nidovirales
224177856	12384	Viruses	species	Porcine reproductive and respiratory syndrome virus	28344	11046	1994-01-01	ssRNA viruses	ssRNA positive-strand viruses, no DNA stage					Viruses	Arteriviridae	Arterivirus		Nidovirales
224177863	12370	Viruses	species	Porcine reproductive and respiratory syndrome virus	28344	11046	1994-01-01	ssRNA viruses	ssRNA positive-strand viruses, no DNA stage					Viruses	Arteriviridae	Arterivirus		Nidovirales
224177871	12440	Viruses	species	Porcine reproductive and respiratory syndrome virus	28344	11046	1994-01-01	ssRNA viruses	ssRNA positive-strand viruses, no DNA stage					Viruses	Arteriviridae	Arterivirus		Nidovirales
224177879	11876	Viruses	species	Porcine reproductive and respiratory syndrome virus	28344	11046	1994-01-01	ssRNA viruses	ssRNA positive-strand viruses, no DNA stage					Viruses	Arteriviridae	Arterivirus		Nidovirales
224177886	12138	Viruses	species	Porcine reproductive and respiratory syndrome virus	28344	11046	1994-01-01	ssRNA viruses	ssRNA positive-strand viruses, no DNA stage					Viruses	Arteriviridae	Arterivirus		Nidovirales
224177893	9834	Viruses	species	Porcine reproductive and respiratory syndrome virus	28344	11046	1994-01-01	ssRNA viruses	ssRNA positive-strand viruses, no DNA stage					Viruses	Arteriviridae	Arterivirus		Nidovirales
224177902	9834	Viruses	species	Porcine reproductive and respiratory syndrome virus	28344	11046	1994-01-01	ssRNA viruses	ssRNA positive-strand viruses, no DNA stage					Viruses	Arteriviridae	Arterivirus		Nidovirales
224177911	9834	Viruses	species	Porcine reproductive and respiratory syndrome virus	28344	11046	1994-01-01	ssRNA viruses	ssRNA positive-strand viruses, no DNA stage					Viruses	Arteriviridae	Arterivirus		Nidovirales
224177936	110	Viruses	species	Porcine reproductive and respiratory syndrome virus	28344	11046	1994-01-01	ssRNA viruses	ssRNA positive-strand viruses, no DNA stage					Viruses	Arteriviridae	Arterivirus		Nidovirales
225572521	11891	Viruses	species	Porcine reproductive and respiratory syndrome virus	28344	11046	1994-01-01	ssRNA viruses	ssRNA positive-strand viruses, no DNA stage					Viruses	Arteriviridae	Arterivirus		Nidovirales
225572530	11873	Viruses	species	Porcine reproductive and respiratory syndrome virus	28344	11046	1994-01-01	ssRNA viruses	ssRNA positive-strand viruses, no DNA stage					Viruses	Arteriviridae	Arterivirus		Nidovirales
225572539	11824	Viruses	species	Porcine reproductive and respiratory syndrome virus	28344	11046	1994-01-01	ssRNA viruses	ssRNA positive-strand viruses, no DNA stage					Viruses	Arteriviridae	Arterivirus		Nidovirales
225572548	11764	Viruses	species	Porcine reproductive and respiratory syndrome virus	28344	11046	1994-01-01	ssRNA viruses	ssRNA positive-strand viruses, no DNA stage					Viruses	Arteriviridae	Arterivirus		Nidovirales
225572557	11891	Viruses	species	Porcine reproductive and respiratory syndrome virus	28344	11046	1994-01-01	ssRNA viruses	ssRNA positive-strand viruses, no DNA stage					Viruses	Arteriviridae	Arterivirus		Nidovirales
227937239	105	Viruses	species	Porcine reproductive and respiratory syndrome virus	28344	11046	1994-01-01	ssRNA viruses	ssRNA positive-strand viruses, no DNA stage					Viruses	Arteriviridae	Arterivirus		Nidovirales
227955710	11932	Viruses	species	Porcine reproductive and respiratory syndrome virus	28344	11046	1994-01-01	ssRNA viruses	ssRNA positive-strand viruses, no DNA stage					Viruses	Arteriviridae	Arterivirus		Nidovirales
229470787	12111	Viruses	species	Porcine reproductive and respiratory syndrome virus	28344	11046	1994-01-01	ssRNA viruses	ssRNA positive-strand viruses, no DNA stage					Viruses	Arteriviridae	Arterivirus		Nidovirales
229470796	11914	Viruses	species	Porcine reproductive and respiratory syndrome virus	28344	11046	1994-01-01	ssRNA viruses	ssRNA positive-strand viruses, no DNA stage					Viruses	Arteriviridae	Arterivirus		Nidovirales
229915266	11778	Viruses	species	Porcine reproductive and respiratory syndrome virus	28344	11046	1994-01-01	ssRNA viruses	ssRNA positive-strand viruses, no DNA stage					Viruses	Arteriviridae	Arterivirus		Nidovirales
229915273	11495	Viruses	species	Porcine reproductive and respiratory syndrome virus	28344	11046	1994-01-01	ssRNA viruses	ssRNA positive-strand viruses, no DNA stage					Viruses	Arteriviridae	Arterivirus		Nidovirales
229915280	11488	Viruses	species	Porcine reproductive and respiratory syndrome virus	28344	11046	1994-01-01	ssRNA viruses	ssRNA positive-strand viruses, no DNA stage					Viruses	Arteriviridae	Arterivirus		Nidovirales
229915287	11850	Viruses	species	Porcine reproductive and respiratory syndrome virus	28344	11046	1994-01-01	ssRNA viruses	ssRNA positive-strand viruses, no DNA stage					Viruses	Arteriviridae	Arterivirus		Nidovirales
253720370	11764	Viruses	species	Porcine reproductive and respiratory syndrome virus	28344	11046	1994-01-01	ssRNA viruses	ssRNA positive-strand viruses, no DNA stage					Viruses	Arteriviridae	Arterivirus		Nidovirales
254771955	11963	Viruses	species	Porcine reproductive and respiratory syndrome virus	28344	11046	1994-01-01	ssRNA viruses	ssRNA positive-strand viruses, no DNA stage					Viruses	Arteriviridae	Arterivirus		Nidovirales
254771964	11654	Viruses	species	Porcine reproductive and respiratory syndrome virus	28344	11046	1994-01-01	ssRNA viruses	ssRNA positive-strand viruses, no DNA stage					Viruses	Arteriviridae	Arterivirus		Nidovirales
255316773	291	Viruses	species	Porcine reproductive and respiratory syndrome virus	28344	11046	1994-01-01	ssRNA viruses	ssRNA positive-strand viruses, no DNA stage					Viruses	Arteriviridae	Arterivirus		Nidovirales
255316789	518	Viruses	species	Porcine reproductive and respiratory syndrome virus	28344	11046	1994-01-01	ssRNA viruses	ssRNA positive-strand viruses, no DNA stage					Viruses	Arteriviridae	Arterivirus		Nidovirales
255733295	12175	Viruses	species	Porcine reproductive and respiratory syndrome virus	28344	11046	1994-01-01	ssRNA viruses	ssRNA positive-strand viruses, no DNA stage					Viruses	Arteriviridae	Arterivirus		Nidovirales
259017817	15120	Viruses	species	Porcine reproductive and respiratory syndrome virus	28344	11046	1994-01-01	ssRNA viruses	ssRNA positive-strand viruses, no DNA stage					Viruses	Arteriviridae	Arterivirus		Nidovirales
259045827	11848	Viruses	species	Porcine reproductive and respiratory syndrome virus	28344	11046	1994-01-01	ssRNA viruses	ssRNA positive-strand viruses, no DNA stage					Viruses	Arteriviridae	Arterivirus		Nidovirales
259045836	12005	Viruses	species	Porcine reproductive and respiratory syndrome virus	28344	11046	1994-01-01	ssRNA viruses	ssRNA positive-strand viruses, no DNA stage					Viruses	Arteriviridae	Arterivirus		Nidovirales
259045845	11796	Viruses	species	Porcine reproductive and respiratory syndrome virus	28344	11046	1994-01-01	ssRNA viruses	ssRNA positive-strand viruses, no DNA stage					Viruses	Arteriviridae	Arterivirus		Nidovirales
259045854	11774	Viruses	species	Porcine reproductive and respiratory syndrome virus	28344	11046	1994-01-01	ssRNA viruses	ssRNA positive-strand viruses, no DNA stage					Viruses	Arteriviridae	Arterivirus		Nidovirales
259129680	11887	Viruses	species	Porcine reproductive and respiratory syndrome virus	28344	11046	1994-01-01	ssRNA viruses	ssRNA positive-strand viruses, no DNA stage					Viruses	Arteriviridae	Arterivirus		Nidovirales
259490805	12184	Viruses	species	Porcine reproductive and respiratory syndrome virus	28344	11046	1994-01-01	ssRNA viruses	ssRNA positive-strand viruses, no DNA stage					Viruses	Arteriviridae	Arterivirus		Nidovirales
260175547	12213	Viruses	species	Porcine reproductive and respiratory syndrome virus	28344	11046	1994-01-01	ssRNA viruses	ssRNA positive-strand viruses, no DNA stage					Viruses	Arteriviridae	Arterivirus		Nidovirales
262181372	308	Viruses	species	Porcine reproductive and respiratory syndrome virus	28344	11046	1994-01-01	ssRNA viruses	ssRNA positive-strand viruses, no DNA stage					Viruses	Arteriviridae	Arterivirus		Nidovirales
262358346	15059	Viruses	species	Porcine reproductive and respiratory syndrome virus	28344	11046	1994-01-01	ssRNA viruses	ssRNA positive-strand viruses, no DNA stage					Viruses	Arteriviridae	Arterivirus		Nidovirales
262358356	15068	Viruses	species	Porcine reproductive and respiratory syndrome virus	28344	11046	1994-01-01	ssRNA viruses	ssRNA positive-strand viruses, no DNA stage					Viruses	Arteriviridae	Arterivirus		Nidovirales
262358372	15098	Viruses	species	Porcine reproductive and respiratory syndrome virus	28344	11046	1994-01-01	ssRNA viruses	ssRNA positive-strand viruses, no DNA stage					Viruses	Arteriviridae	Arterivirus		Nidovirales
269969743	11339	Viruses	species	Porcine reproductive and respiratory syndrome virus	28344	11046	1994-01-01	ssRNA viruses	ssRNA positive-strand viruses, no DNA stage					Viruses	Arteriviridae	Arterivirus		Nidovirales
270000217	12358	Viruses	species	Porcine reproductive and respiratory syndrome virus	28344	11046	1994-01-01	ssRNA viruses	ssRNA positive-strand viruses, no DNA stage					Viruses	Arteriviridae	Arterivirus		Nidovirales
270000226	12276	Viruses	species	Porcine reproductive and respiratory syndrome virus	28344	11046	1994-01-01	ssRNA viruses	ssRNA positive-strand viruses, no DNA stage					Viruses	Arteriviridae	Arterivirus		Nidovirales
270000235	11618	Viruses	species	Porcine reproductive and respiratory syndrome virus	28344	11046	1994-01-01	ssRNA viruses	ssRNA positive-strand viruses, no DNA stage					Viruses	Arteriviridae	Arterivirus		Nidovirales
270055151	12095	Viruses	species	Porcine reproductive and respiratory syndrome virus	28344	11046	1994-01-01	ssRNA viruses	ssRNA positive-strand viruses, no DNA stage					Viruses	Arteriviridae	Arterivirus		Nidovirales
270272192	11551	Viruses	species	Porcine reproductive and respiratory syndrome virus	28344	11046	1994-01-01	ssRNA viruses	ssRNA positive-strand viruses, no DNA stage					Viruses	Arteriviridae	Arterivirus		Nidovirales
281494432	4073	Viruses	species	Porcine reproductive and respiratory syndrome virus	28344	11046	1994-01-01	ssRNA viruses	ssRNA positive-strand viruses, no DNA stage					Viruses	Arteriviridae	Arterivirus		Nidovirales
282765970	11992	Viruses	species	Porcine reproductive and respiratory syndrome virus	28344	11046	1994-01-01	ssRNA viruses	ssRNA positive-strand viruses, no DNA stage					Viruses	Arteriviridae	Arterivirus		Nidovirales
282765979	11903	Viruses	species	Porcine reproductive and respiratory syndrome virus	28344	11046	1994-01-01	ssRNA viruses	ssRNA positive-strand viruses, no DNA stage					Viruses	Arteriviridae	Arterivirus		Nidovirales
282765988	11929	Viruses	species	Porcine reproductive and respiratory syndrome virus	28344	11046	1994-01-01	ssRNA viruses	ssRNA positive-strand viruses, no DNA stage					Viruses	Arteriviridae	Arterivirus		Nidovirales
282765997	11787	Viruses	species	Porcine reproductive and respiratory syndrome virus	28344	11046	1994-01-01	ssRNA viruses	ssRNA positive-strand viruses, no DNA stage					Viruses	Arteriviridae	Arterivirus		Nidovirales
283827848	12128	Viruses	species	Porcine reproductive and respiratory syndrome virus	28344	11046	1994-01-01	ssRNA viruses	ssRNA positive-strand viruses, no DNA stage					Viruses	Arteriviridae	Arterivirus		Nidovirales
288816301	12366	Viruses	species	Porcine reproductive and respiratory syndrome virus	28344	11046	1994-01-01	ssRNA viruses	ssRNA positive-strand viruses, no DNA stage					Viruses	Arteriviridae	Arterivirus		Nidovirales
289583256	12158	Viruses	species	Porcine reproductive and respiratory syndrome virus	28344	11046	1994-01-01	ssRNA viruses	ssRNA positive-strand viruses, no DNA stage					Viruses	Arteriviridae	Arterivirus		Nidovirales
295848286	11388	Viruses	species	Porcine reproductive and respiratory syndrome virus	28344	11046	1994-01-01	ssRNA viruses	ssRNA positive-strand viruses, no DNA stage					Viruses	Arteriviridae	Arterivirus		Nidovirales
295917486	12114	Viruses	species	Porcine reproductive and respiratory syndrome virus	28344	11046	1994-01-01	ssRNA viruses	ssRNA positive-strand viruses, no DNA stage					Viruses	Arteriviridae	Arterivirus		Nidovirales
295917495	11692	Viruses	species	Porcine reproductive and respiratory syndrome virus	28344	11046	1994-01-01	ssRNA viruses	ssRNA positive-strand viruses, no DNA stage					Viruses	Arteriviridae	Arterivirus		Nidovirales
298161291	11295	Viruses	species	Equine arteritis virus	11047	11046	1996-03-27	ssRNA viruses	ssRNA positive-strand viruses, no DNA stage					Viruses	Arteriviridae	Arterivirus		Nidovirales
298161301	10982	Viruses	species	Equine arteritis virus	11047	11046	1996-03-27	ssRNA viruses	ssRNA positive-strand viruses, no DNA stage					Viruses	Arteriviridae	Arterivirus		Nidovirales
298161311	11244	Viruses	species	Equine arteritis virus	11047	11046	1996-03-27	ssRNA viruses	ssRNA positive-strand viruses, no DNA stage					Viruses	Arteriviridae	Arterivirus		Nidovirales
298161321	11234	Viruses	species	Equine arteritis virus	11047	11046	1996-03-27	ssRNA viruses	ssRNA positive-strand viruses, no DNA stage					Viruses	Arteriviridae	Arterivirus		Nidovirales
298161331	11097	Viruses	species	Equine arteritis virus	11047	11046	1996-03-27	ssRNA viruses	ssRNA positive-strand viruses, no DNA stage					Viruses	Arteriviridae	Arterivirus		Nidovirales
298161341	11293	Viruses	species	Equine arteritis virus	11047	11046	1996-03-27	ssRNA viruses	ssRNA positive-strand viruses, no DNA stage					Viruses	Arteriviridae	Arterivirus		Nidovirales
298161351	11333	Viruses	species	Equine arteritis virus	11047	11046	1996-03-27	ssRNA viruses	ssRNA positive-strand viruses, no DNA stage					Viruses	Arteriviridae	Arterivirus		Nidovirales
298161361	11293	Viruses	species	Equine arteritis virus	11047	11046	1996-03-27	ssRNA viruses	ssRNA positive-strand viruses, no DNA stage					Viruses	Arteriviridae	Arterivirus		Nidovirales
298161371	11186	Viruses	species	Equine arteritis virus	11047	11046	1996-03-27	ssRNA viruses	ssRNA positive-strand viruses, no DNA stage					Viruses	Arteriviridae	Arterivirus		Nidovirales
298161381	11295	Viruses	species	Equine arteritis virus	11047	11046	1996-03-27	ssRNA viruses	ssRNA positive-strand viruses, no DNA stage					Viruses	Arteriviridae	Arterivirus		Nidovirales
298161391	11186	Viruses	species	Equine arteritis virus	11047	11046	1996-03-27	ssRNA viruses	ssRNA positive-strand viruses, no DNA stage					Viruses	Arteriviridae	Arterivirus		Nidovirales
298161401	11298	Viruses	species	Equine arteritis virus	11047	11046	1996-03-27	ssRNA viruses	ssRNA positive-strand viruses, no DNA stage					Viruses	Arteriviridae	Arterivirus		Nidovirales
298161411	11229	Viruses	species	Equine arteritis virus	11047	11046	1996-03-27	ssRNA viruses	ssRNA positive-strand viruses, no DNA stage					Viruses	Arteriviridae	Arterivirus		Nidovirales
298161421	11318	Viruses	species	Equine arteritis virus	11047	11046	1996-03-27	ssRNA viruses	ssRNA positive-strand viruses, no DNA stage					Viruses	Arteriviridae	Arterivirus		Nidovirales
298161431	11189	Viruses	species	Equine arteritis virus	11047	11046	1996-03-27	ssRNA viruses	ssRNA positive-strand viruses, no DNA stage					Viruses	Arteriviridae	Arterivirus		Nidovirales
298161441	11230	Viruses	species	Equine arteritis virus	11047	11046	1996-03-27	ssRNA viruses	ssRNA positive-strand viruses, no DNA stage					Viruses	Arteriviridae	Arterivirus		Nidovirales
298161451	11225	Viruses	species	Equine arteritis virus	11047	11046	1996-03-27	ssRNA viruses	ssRNA positive-strand viruses, no DNA stage					Viruses	Arteriviridae	Arterivirus		Nidovirales
298161461	11173	Viruses	species	Equine arteritis virus	11047	11046	1996-03-27	ssRNA viruses	ssRNA positive-strand viruses, no DNA stage					Viruses	Arteriviridae	Arterivirus		Nidovirales
301760366	12362	Viruses	species	Porcine reproductive and respiratory syndrome virus	28344	11046	1994-01-01	ssRNA viruses	ssRNA positive-strand viruses, no DNA stage					Viruses	Arteriviridae	Arterivirus		Nidovirales
301760377	12820	Viruses	species	Porcine reproductive and respiratory syndrome virus	28344	11046	1994-01-01	ssRNA viruses	ssRNA positive-strand viruses, no DNA stage					Viruses	Arteriviridae	Arterivirus		Nidovirales
301760388	12374	Viruses	species	Porcine reproductive and respiratory syndrome virus	28344	11046	1994-01-01	ssRNA viruses	ssRNA positive-strand viruses, no DNA stage					Viruses	Arteriviridae	Arterivirus		Nidovirales
305690666	12079	Viruses	species	Porcine reproductive and respiratory syndrome virus	28344	11046	1994-01-01	ssRNA viruses	ssRNA positive-strand viruses, no DNA stage					Viruses	Arteriviridae	Arterivirus		Nidovirales
319921839	11781	Viruses	species	Porcine reproductive and respiratory syndrome virus	28344	11046	1994-01-01	ssRNA viruses	ssRNA positive-strand viruses, no DNA stage					Viruses	Arteriviridae	Arterivirus		Nidovirales
319921848	10887	Viruses	species	Porcine reproductive and respiratory syndrome virus	28344	11046	1994-01-01	ssRNA viruses	ssRNA positive-strand viruses, no DNA stage					Viruses	Arteriviridae	Arterivirus		Nidovirales
324035407	12008	Viruses	species	Porcine reproductive and respiratory syndrome virus	28344	11046	1994-01-01	ssRNA viruses	ssRNA positive-strand viruses, no DNA stage					Viruses	Arteriviridae	Arterivirus		Nidovirales
325149530	12107	Viruses	species	Porcine reproductive and respiratory syndrome virus	28344	11046	1994-01-01	ssRNA viruses	ssRNA positive-strand viruses, no DNA stage					Viruses	Arteriviridae	Arterivirus		Nidovirales
325149539	12174	Viruses	species	Porcine reproductive and respiratory syndrome virus	28344	11046	1994-01-01	ssRNA viruses	ssRNA positive-strand viruses, no DNA stage					Viruses	Arteriviridae	Arterivirus		Nidovirales
325149548	11955	Viruses	species	Porcine reproductive and respiratory syndrome virus	28344	11046	1994-01-01	ssRNA viruses	ssRNA positive-strand viruses, no DNA stage					Viruses	Arteriviridae	Arterivirus		Nidovirales
325534723	11604	Viruses	species	Porcine reproductive and respiratory syndrome virus	28344	11046	1994-01-01	ssRNA viruses	ssRNA positive-strand viruses, no DNA stage					Viruses	Arteriviridae	Arterivirus		Nidovirales
325534732	11443	Viruses	species	Porcine reproductive and respiratory syndrome virus	28344	11046	1994-01-01	ssRNA viruses	ssRNA positive-strand viruses, no DNA stage					Viruses	Arteriviridae	Arterivirus		Nidovirales
325534741	11856	Viruses	species	Porcine reproductive and respiratory syndrome virus	28344	11046	1994-01-01	ssRNA viruses	ssRNA positive-strand viruses, no DNA stage					Viruses	Arteriviridae	Arterivirus		Nidovirales
325534750	11909	Viruses	species	Porcine reproductive and respiratory syndrome virus	28344	11046	1994-01-01	ssRNA viruses	ssRNA positive-strand viruses, no DNA stage					Viruses	Arteriviridae	Arterivirus		Nidovirales
339409383	15014	Viruses	species	Porcine reproductive and respiratory syndrome virus	28344	11046	1994-01-01	ssRNA viruses	ssRNA positive-strand viruses, no DNA stage					Viruses	Arteriviridae	Arterivirus		Nidovirales
340807380	12455	Viruses	species	Porcine reproductive and respiratory syndrome virus	28344	11046	1994-01-01	ssRNA viruses	ssRNA positive-strand viruses, no DNA stage					Viruses	Arteriviridae	Arterivirus		Nidovirales
341575753	11833	Viruses	species	Porcine reproductive and respiratory syndrome virus	28344	11046	1994-01-01	ssRNA viruses	ssRNA positive-strand viruses, no DNA stage					Viruses	Arteriviridae	Arterivirus		Nidovirales
342731154	12012	Viruses	species	Porcine reproductive and respiratory syndrome virus	28344	11046	1994-01-01	ssRNA viruses	ssRNA positive-strand viruses, no DNA stage					Viruses	Arteriviridae	Arterivirus		Nidovirales
342731163	12643	Viruses	species	Porcine reproductive and respiratory syndrome virus	28344	11046	1994-01-01	ssRNA viruses	ssRNA positive-strand viruses, no DNA stage					Viruses	Arteriviridae	Arterivirus		Nidovirales
342731172	12010	Viruses	species	Porcine reproductive and respiratory syndrome virus	28344	11046	1994-01-01	ssRNA viruses	ssRNA positive-strand viruses, no DNA stage					Viruses	Arteriviridae	Arterivirus		Nidovirales
342731181	12605	Viruses	species	Porcine reproductive and respiratory syndrome virus	28344	11046	1994-01-01	ssRNA viruses	ssRNA positive-strand viruses, no DNA stage					Viruses	Arteriviridae	Arterivirus		Nidovirales
342731190	12603	Viruses	species	Porcine reproductive and respiratory syndrome virus	28344	11046	1994-01-01	ssRNA viruses	ssRNA positive-strand viruses, no DNA stage					Viruses	Arteriviridae	Arterivirus		Nidovirales
342731199	12169	Viruses	species	Porcine reproductive and respiratory syndrome virus	28344	11046	1994-01-01	ssRNA viruses	ssRNA positive-strand viruses, no DNA stage					Viruses	Arteriviridae	Arterivirus		Nidovirales
342731208	12310	Viruses	species	Porcine reproductive and respiratory syndrome virus	28344	11046	1994-01-01	ssRNA viruses	ssRNA positive-strand viruses, no DNA stage					Viruses	Arteriviridae	Arterivirus		Nidovirales
342731217	12468	Viruses	species	Porcine reproductive and respiratory syndrome virus	28344	11046	1994-01-01	ssRNA viruses	ssRNA positive-strand viruses, no DNA stage					Viruses	Arteriviridae	Arterivirus		Nidovirales
342731226	12062	Viruses	species	Porcine reproductive and respiratory syndrome virus	28344	11046	1994-01-01	ssRNA viruses	ssRNA positive-strand viruses, no DNA stage					Viruses	Arteriviridae	Arterivirus		Nidovirales
342731235	12022	Viruses	species	Porcine reproductive and respiratory syndrome virus	28344	11046	1994-01-01	ssRNA viruses	ssRNA positive-strand viruses, no DNA stage					Viruses	Arteriviridae	Arterivirus		Nidovirales
342731244	11956	Viruses	species	Porcine reproductive and respiratory syndrome virus	28344	11046	1994-01-01	ssRNA viruses	ssRNA positive-strand viruses, no DNA stage					Viruses	Arteriviridae	Arterivirus		Nidovirales
342731253	11912	Viruses	species	Porcine reproductive and respiratory syndrome virus	28344	11046	1994-01-01	ssRNA viruses	ssRNA positive-strand viruses, no DNA stage					Viruses	Arteriviridae	Arterivirus		Nidovirales
342731262	12432	Viruses	species	Porcine reproductive and respiratory syndrome virus	28344	11046	1994-01-01	ssRNA viruses	ssRNA positive-strand viruses, no DNA stage					Viruses	Arteriviridae	Arterivirus		Nidovirales
347438911	12197	Viruses	species	Porcine reproductive and respiratory syndrome virus	28344	11046	1994-01-01	ssRNA viruses	ssRNA positive-strand viruses, no DNA stage					Viruses	Arteriviridae	Arterivirus		Nidovirales
349502023	15001	Viruses	species	Porcine reproductive and respiratory syndrome virus	28344	11046	1994-01-01	ssRNA viruses	ssRNA positive-strand viruses, no DNA stage					Viruses	Arteriviridae	Arterivirus		Nidovirales
355947689	11703	Viruses	species	Porcine reproductive and respiratory syndrome virus	28344	11046	1994-01-01	ssRNA viruses	ssRNA positive-strand viruses, no DNA stage					Viruses	Arteriviridae	Arterivirus		Nidovirales
355947700	12033	Viruses	species	Porcine reproductive and respiratory syndrome virus	28344	11046	1994-01-01	ssRNA viruses	ssRNA positive-strand viruses, no DNA stage					Viruses	Arteriviridae	Arterivirus		Nidovirales
359358389	12591	Viruses	species	Porcine reproductive and respiratory syndrome virus	28344	11046	1994-01-01	ssRNA viruses	ssRNA positive-strand viruses, no DNA stage					Viruses	Arteriviridae	Arterivirus		Nidovirales
359466088	11729	Viruses	species	Porcine reproductive and respiratory syndrome virus	28344	11046	1994-01-01	ssRNA viruses	ssRNA positive-strand viruses, no DNA stage					Viruses	Arteriviridae	Arterivirus		Nidovirales
361544944	11653	Viruses	species	Porcine reproductive and respiratory syndrome virus	28344	11046	1994-01-01	ssRNA viruses	ssRNA positive-strand viruses, no DNA stage					Viruses	Arteriviridae	Arterivirus		Nidovirales
361544954	11759	Viruses	species	Porcine reproductive and respiratory syndrome virus	28344	11046	1994-01-01	ssRNA viruses	ssRNA positive-strand viruses, no DNA stage					Viruses	Arteriviridae	Arterivirus		Nidovirales
361544964	11615	Viruses	species	Porcine reproductive and respiratory syndrome virus	28344	11046	1994-01-01	ssRNA viruses	ssRNA positive-strand viruses, no DNA stage					Viruses	Arteriviridae	Arterivirus		Nidovirales
361544974	11726	Viruses	species	Porcine reproductive and respiratory syndrome virus	28344	11046	1994-01-01	ssRNA viruses	ssRNA positive-strand viruses, no DNA stage					Viruses	Arteriviridae	Arterivirus		Nidovirales
364782498	11375	Viruses	species	Equine arteritis virus	11047	11046	1996-03-27	ssRNA viruses	ssRNA positive-strand viruses, no DNA stage					Viruses	Arteriviridae	Arterivirus		Nidovirales
364782523	11341	Viruses	species	Equine arteritis virus	11047	11046	1996-03-27	ssRNA viruses	ssRNA positive-strand viruses, no DNA stage					Viruses	Arteriviridae	Arterivirus		Nidovirales
364782534	11520	Viruses	species	Equine arteritis virus	11047	11046	1996-03-27	ssRNA viruses	ssRNA positive-strand viruses, no DNA stage					Viruses	Arteriviridae	Arterivirus		Nidovirales
364782545	11674	Viruses	species	Equine arteritis virus	11047	11046	1996-03-27	ssRNA viruses	ssRNA positive-strand viruses, no DNA stage					Viruses	Arteriviridae	Arterivirus		Nidovirales
364782556	11744	Viruses	species	Equine arteritis virus	11047	11046	1996-03-27	ssRNA viruses	ssRNA positive-strand viruses, no DNA stage					Viruses	Arteriviridae	Arterivirus		Nidovirales
372199323	12423	Viruses	species	Porcine reproductive and respiratory syndrome virus	28344	11046	1994-01-01	ssRNA viruses	ssRNA positive-strand viruses, no DNA stage					Viruses	Arteriviridae	Arterivirus		Nidovirales
374256621	11312	Viruses	species	Porcine reproductive and respiratory syndrome virus	28344	11046	1994-01-01	ssRNA viruses	ssRNA positive-strand viruses, no DNA stage					Viruses	Arteriviridae	Arterivirus		Nidovirales
378405639	102	Viruses	species	Porcine reproductive and respiratory syndrome virus	28344	11046	1994-01-01	ssRNA viruses	ssRNA positive-strand viruses, no DNA stage					Viruses	Arteriviridae	Arterivirus		Nidovirales
381216220	14373	Viruses	species	Porcine reproductive and respiratory syndrome virus	28344	11046	1994-01-01	ssRNA viruses	ssRNA positive-strand viruses, no DNA stage					Viruses	Arteriviridae	Arterivirus		Nidovirales
381352411	12103	Viruses	species	Porcine reproductive and respiratory syndrome virus	28344	11046	1994-01-01	ssRNA viruses	ssRNA positive-strand viruses, no DNA stage					Viruses	Arteriviridae	Arterivirus		Nidovirales
381352420	12523	Viruses	species	Porcine reproductive and respiratory syndrome virus	28344	11046	1994-01-01	ssRNA viruses	ssRNA positive-strand viruses, no DNA stage					Viruses	Arteriviridae	Arterivirus		Nidovirales
382929416	11794	Viruses	species	Porcine reproductive and respiratory syndrome virus	28344	11046	1994-01-01	ssRNA viruses	ssRNA positive-strand viruses, no DNA stage					Viruses	Arteriviridae	Arterivirus		Nidovirales
387158416	11713	Viruses	species	Porcine reproductive and respiratory syndrome virus	28344	11046	1994-01-01	ssRNA viruses	ssRNA positive-strand viruses, no DNA stage					Viruses	Arteriviridae	Arterivirus		Nidovirales
387600197	13027	Viruses	species	Porcine reproductive and respiratory syndrome virus	28344	11046	1994-01-01	ssRNA viruses	ssRNA positive-strand viruses, no DNA stage					Viruses	Arteriviridae	Arterivirus		Nidovirales
387600206	11532	Viruses	species	Porcine reproductive and respiratory syndrome virus	28344	11046	1994-01-01	ssRNA viruses	ssRNA positive-strand viruses, no DNA stage					Viruses	Arteriviridae	Arterivirus		Nidovirales
387862488	12233	Viruses	species	Porcine reproductive and respiratory syndrome virus	28344	11046	1994-01-01	ssRNA viruses	ssRNA positive-strand viruses, no DNA stage					Viruses	Arteriviridae	Arterivirus		Nidovirales
387862497	12689	Viruses	species	Porcine reproductive and respiratory syndrome virus	28344	11046	1994-01-01	ssRNA viruses	ssRNA positive-strand viruses, no DNA stage					Viruses	Arteriviridae	Arterivirus		Nidovirales
387862506	12541	Viruses	species	Porcine reproductive and respiratory syndrome virus	28344	11046	1994-01-01	ssRNA viruses	ssRNA positive-strand viruses, no DNA stage					Viruses	Arteriviridae	Arterivirus		Nidovirales
387862515	12508	Viruses	species	Porcine reproductive and respiratory syndrome virus	28344	11046	1994-01-01	ssRNA viruses	ssRNA positive-strand viruses, no DNA stage					Viruses	Arteriviridae	Arterivirus		Nidovirales
387862524	12541	Viruses	species	Porcine reproductive and respiratory syndrome virus	28344	11046	1994-01-01	ssRNA viruses	ssRNA positive-strand viruses, no DNA stage					Viruses	Arteriviridae	Arterivirus		Nidovirales
387862533	12709	Viruses	species	Porcine reproductive and respiratory syndrome virus	28344	11046	1994-01-01	ssRNA viruses	ssRNA positive-strand viruses, no DNA stage					Viruses	Arteriviridae	Arterivirus		Nidovirales
387862542	12514	Viruses	species	Porcine reproductive and respiratory syndrome virus	28344	11046	1994-01-01	ssRNA viruses	ssRNA positive-strand viruses, no DNA stage					Viruses	Arteriviridae	Arterivirus		Nidovirales
387862551	12513	Viruses	species	Porcine reproductive and respiratory syndrome virus	28344	11046	1994-01-01	ssRNA viruses	ssRNA positive-strand viruses, no DNA stage					Viruses	Arteriviridae	Arterivirus		Nidovirales
387862560	12481	Viruses	species	Porcine reproductive and respiratory syndrome virus	28344	11046	1994-01-01	ssRNA viruses	ssRNA positive-strand viruses, no DNA stage					Viruses	Arteriviridae	Arterivirus		Nidovirales
387862569	12656	Viruses	species	Porcine reproductive and respiratory syndrome virus	28344	11046	1994-01-01	ssRNA viruses	ssRNA positive-strand viruses, no DNA stage					Viruses	Arteriviridae	Arterivirus		Nidovirales
387862578	12664	Viruses	species	Porcine reproductive and respiratory syndrome virus	28344	11046	1994-01-01	ssRNA viruses	ssRNA positive-strand viruses, no DNA stage					Viruses	Arteriviridae	Arterivirus		Nidovirales
387862587	12469	Viruses	species	Porcine reproductive and respiratory syndrome virus	28344	11046	1994-01-01	ssRNA viruses	ssRNA positive-strand viruses, no DNA stage					Viruses	Arteriviridae	Arterivirus		Nidovirales
387862596	11689	Viruses	species	Porcine reproductive and respiratory syndrome virus	28344	11046	1994-01-01	ssRNA viruses	ssRNA positive-strand viruses, no DNA stage					Viruses	Arteriviridae	Arterivirus		Nidovirales
387862605	12510	Viruses	species	Porcine reproductive and respiratory syndrome virus	28344	11046	1994-01-01	ssRNA viruses	ssRNA positive-strand viruses, no DNA stage					Viruses	Arteriviridae	Arterivirus		Nidovirales
387862614	12185	Viruses	species	Porcine reproductive and respiratory syndrome virus	28344	11046	1994-01-01	ssRNA viruses	ssRNA positive-strand viruses, no DNA stage					Viruses	Arteriviridae	Arterivirus		Nidovirales
387862623	12794	Viruses	species	Porcine reproductive and respiratory syndrome virus	28344	11046	1994-01-01	ssRNA viruses	ssRNA positive-strand viruses, no DNA stage					Viruses	Arteriviridae	Arterivirus		Nidovirales
387862632	12245	Viruses	species	Porcine reproductive and respiratory syndrome virus	28344	11046	1994-01-01	ssRNA viruses	ssRNA positive-strand viruses, no DNA stage					Viruses	Arteriviridae	Arterivirus		Nidovirales
387862641	12639	Viruses	species	Porcine reproductive and respiratory syndrome virus	28344	11046	1994-01-01	ssRNA viruses	ssRNA positive-strand viruses, no DNA stage					Viruses	Arteriviridae	Arterivirus		Nidovirales
387862650	12740	Viruses	species	Porcine reproductive and respiratory syndrome virus	28344	11046	1994-01-01	ssRNA viruses	ssRNA positive-strand viruses, no DNA stage					Viruses	Arteriviridae	Arterivirus		Nidovirales
387862659	12268	Viruses	species	Porcine reproductive and respiratory syndrome virus	28344	11046	1994-01-01	ssRNA viruses	ssRNA positive-strand viruses, no DNA stage					Viruses	Arteriviridae	Arterivirus		Nidovirales
387862668	12558	Viruses	species	Porcine reproductive and respiratory syndrome virus	28344	11046	1994-01-01	ssRNA viruses	ssRNA positive-strand viruses, no DNA stage					Viruses	Arteriviridae	Arterivirus		Nidovirales
387862677	12586	Viruses	species	Porcine reproductive and respiratory syndrome virus	28344	11046	1994-01-01	ssRNA viruses	ssRNA positive-strand viruses, no DNA stage					Viruses	Arteriviridae	Arterivirus		Nidovirales
387862686	12726	Viruses	species	Porcine reproductive and respiratory syndrome virus	28344	11046	1994-01-01	ssRNA viruses	ssRNA positive-strand viruses, no DNA stage					Viruses	Arteriviridae	Arterivirus		Nidovirales
387862695	12590	Viruses	species	Porcine reproductive and respiratory syndrome virus	28344	11046	1994-01-01	ssRNA viruses	ssRNA positive-strand viruses, no DNA stage					Viruses	Arteriviridae	Arterivirus		Nidovirales
387862704	12719	Viruses	species	Porcine reproductive and respiratory syndrome virus	28344	11046	1994-01-01	ssRNA viruses	ssRNA positive-strand viruses, no DNA stage					Viruses	Arteriviridae	Arterivirus		Nidovirales
387862713	11921	Viruses	species	Porcine reproductive and respiratory syndrome virus	28344	11046	1994-01-01	ssRNA viruses	ssRNA positive-strand viruses, no DNA stage					Viruses	Arteriviridae	Arterivirus		Nidovirales
387862722	11935	Viruses	species	Porcine reproductive and respiratory syndrome virus	28344	11046	1994-01-01	ssRNA viruses	ssRNA positive-strand viruses, no DNA stage					Viruses	Arteriviridae	Arterivirus		Nidovirales
387862731	12461	Viruses	species	Porcine reproductive and respiratory syndrome virus	28344	11046	1994-01-01	ssRNA viruses	ssRNA positive-strand viruses, no DNA stage					Viruses	Arteriviridae	Arterivirus		Nidovirales
387862740	11914	Viruses	species	Porcine reproductive and respiratory syndrome virus	28344	11046	1994-01-01	ssRNA viruses	ssRNA positive-strand viruses, no DNA stage					Viruses	Arteriviridae	Arterivirus		Nidovirales
388540923	14373	Viruses	species	Porcine reproductive and respiratory syndrome virus	28344	11046	1994-01-01	ssRNA viruses	ssRNA positive-strand viruses, no DNA stage					Viruses	Arteriviridae	Arterivirus		Nidovirales
392373119	131	Viruses	species	Porcine reproductive and respiratory syndrome virus	28344	11046	1994-01-01	ssRNA viruses	ssRNA positive-strand viruses, no DNA stage					Viruses	Arteriviridae	Arterivirus		Nidovirales
396582361	2792	Viruses	species	Porcine reproductive and respiratory syndrome virus	28344	11046	1994-01-01	ssRNA viruses	ssRNA positive-strand viruses, no DNA stage					Viruses	Arteriviridae	Arterivirus		Nidovirales
399145992	12057	Viruses	species	Porcine reproductive and respiratory syndrome virus	28344	11046	1994-01-01	ssRNA viruses	ssRNA positive-strand viruses, no DNA stage					Viruses	Arteriviridae	Arterivirus		Nidovirales
399518458	8007	Viruses	species	Porcine reproductive and respiratory syndrome virus	28344	11046	1994-01-01	ssRNA viruses	ssRNA positive-strand viruses, no DNA stage					Viruses	Arteriviridae	Arterivirus		Nidovirales
399518467	13424	Viruses	species	Porcine reproductive and respiratory syndrome virus	28344	11046	1994-01-01	ssRNA viruses	ssRNA positive-strand viruses, no DNA stage					Viruses	Arteriviridae	Arterivirus		Nidovirales
399518476	14285	Viruses	species	Porcine reproductive and respiratory syndrome virus	28344	11046	1994-01-01	ssRNA viruses	ssRNA positive-strand viruses, no DNA stage					Viruses	Arteriviridae	Arterivirus		Nidovirales
399569203	11776	Viruses	species	Porcine reproductive and respiratory syndrome virus	28344	11046	1994-01-01	ssRNA viruses	ssRNA positive-strand viruses, no DNA stage					Viruses	Arteriviridae	Arterivirus		Nidovirales
399569207	11511	Viruses	species	Porcine reproductive and respiratory syndrome virus	28344	11046	1994-01-01	ssRNA viruses	ssRNA positive-strand viruses, no DNA stage					Viruses	Arteriviridae	Arterivirus		Nidovirales
402245814	12036	Viruses	species	Porcine reproductive and respiratory syndrome virus	28344	11046	1994-01-01	ssRNA viruses	ssRNA positive-strand viruses, no DNA stage					Viruses	Arteriviridae	Arterivirus		Nidovirales
405795761	11710	Viruses	species	Porcine reproductive and respiratory syndrome virus	28344	11046	1994-01-01	ssRNA viruses	ssRNA positive-strand viruses, no DNA stage					Viruses	Arteriviridae	Arterivirus		Nidovirales
405795772	11626	Viruses	species	Porcine reproductive and respiratory syndrome virus	28344	11046	1994-01-01	ssRNA viruses	ssRNA positive-strand viruses, no DNA stage					Viruses	Arteriviridae	Arterivirus		Nidovirales
408537474	2464	Viruses	species	Porcine reproductive and respiratory syndrome virus	28344	11046	1994-01-01	ssRNA viruses	ssRNA positive-strand viruses, no DNA stage					Viruses	Arteriviridae	Arterivirus		Nidovirales
426272825	11457	Viruses	species	Porcine reproductive and respiratory syndrome virus	28344	11046	1994-01-01	ssRNA viruses	ssRNA positive-strand viruses, no DNA stage					Viruses	Arteriviridae	Arterivirus		Nidovirales
429141508	12027	Viruses	species	Porcine reproductive and respiratory syndrome virus	28344	11046	1994-01-01	ssRNA viruses	ssRNA positive-strand viruses, no DNA stage					Viruses	Arteriviridae	Arterivirus		Nidovirales
429327105	11928	Viruses	species	Porcine reproductive and respiratory syndrome virus	28344	11046	1994-01-01	ssRNA viruses	ssRNA positive-strand viruses, no DNA stage					Viruses	Arteriviridae	Arterivirus		Nidovirales
429327115	11755	Viruses	species	Porcine reproductive and respiratory syndrome virus	28344	11046	1994-01-01	ssRNA viruses	ssRNA positive-strand viruses, no DNA stage					Viruses	Arteriviridae	Arterivirus		Nidovirales
429327125	11994	Viruses	species	Porcine reproductive and respiratory syndrome virus	28344	11046	1994-01-01	ssRNA viruses	ssRNA positive-strand viruses, no DNA stage					Viruses	Arteriviridae	Arterivirus		Nidovirales
429843762	11983	Viruses	species	Porcine reproductive and respiratory syndrome virus	28344	11046	1994-01-01	ssRNA viruses	ssRNA positive-strand viruses, no DNA stage					Viruses	Arteriviridae	Arterivirus		Nidovirales
429843771	12133	Viruses	species	Porcine reproductive and respiratory syndrome virus	28344	11046	1994-01-01	ssRNA viruses	ssRNA positive-strand viruses, no DNA stage					Viruses	Arteriviridae	Arterivirus		Nidovirales
440495589	11755	Viruses	species	Porcine reproductive and respiratory syndrome virus	28344	11046	1994-01-01	ssRNA viruses	ssRNA positive-strand viruses, no DNA stage					Viruses	Arteriviridae	Arterivirus		Nidovirales
440495598	11826	Viruses	species	Porcine reproductive and respiratory syndrome virus	28344	11046	1994-01-01	ssRNA viruses	ssRNA positive-strand viruses, no DNA stage					Viruses	Arteriviridae	Arterivirus		Nidovirales
440495607	11756	Viruses	species	Porcine reproductive and respiratory syndrome virus	28344	11046	1994-01-01	ssRNA viruses	ssRNA positive-strand viruses, no DNA stage					Viruses	Arteriviridae	Arterivirus		Nidovirales
440495616	11878	Viruses	species	Porcine reproductive and respiratory syndrome virus	28344	11046	1994-01-01	ssRNA viruses	ssRNA positive-strand viruses, no DNA stage					Viruses	Arteriviridae	Arterivirus		Nidovirales
440495625	11729	Viruses	species	Porcine reproductive and respiratory syndrome virus	28344	11046	1994-01-01	ssRNA viruses	ssRNA positive-strand viruses, no DNA stage					Viruses	Arteriviridae	Arterivirus		Nidovirales
440495634	11749	Viruses	species	Porcine reproductive and respiratory syndrome virus	28344	11046	1994-01-01	ssRNA viruses	ssRNA positive-strand viruses, no DNA stage					Viruses	Arteriviridae	Arterivirus		Nidovirales
440495643	11767	Viruses	species	Porcine reproductive and respiratory syndrome virus	28344	11046	1994-01-01	ssRNA viruses	ssRNA positive-strand viruses, no DNA stage					Viruses	Arteriviridae	Arterivirus		Nidovirales
440551362	11713	Viruses	species	Porcine reproductive and respiratory syndrome virus	28344	11046	1994-01-01	ssRNA viruses	ssRNA positive-strand viruses, no DNA stage					Viruses	Arteriviridae	Arterivirus		Nidovirales
460838726	12567	Viruses	species	Porcine reproductive and respiratory syndrome virus	28344	11046	1994-01-01	ssRNA viruses	ssRNA positive-strand viruses, no DNA stage					Viruses	Arteriviridae	Arterivirus		Nidovirales
469665509	15061	Viruses	species	Porcine reproductive and respiratory syndrome virus	28344	11046	1994-01-01	ssRNA viruses	ssRNA positive-strand viruses, no DNA stage					Viruses	Arteriviridae	Arterivirus		Nidovirales
469665518	15058	Viruses	species	Porcine reproductive and respiratory syndrome virus	28344	11046	1994-01-01	ssRNA viruses	ssRNA positive-strand viruses, no DNA stage					Viruses	Arteriviridae	Arterivirus		Nidovirales
469665527	15058	Viruses	species	Porcine reproductive and respiratory syndrome virus	28344	11046	1994-01-01	ssRNA viruses	ssRNA positive-strand viruses, no DNA stage					Viruses	Arteriviridae	Arterivirus		Nidovirales
473175345	12748	Viruses	species	Porcine reproductive and respiratory syndrome virus	28344	11046	1994-01-01	ssRNA viruses	ssRNA positive-strand viruses, no DNA stage					Viruses	Arteriviridae	Arterivirus		Nidovirales
473175361	11738	Viruses	species	Porcine reproductive and respiratory syndrome virus	28344	11046	1994-01-01	ssRNA viruses	ssRNA positive-strand viruses, no DNA stage					Viruses	Arteriviridae	Arterivirus		Nidovirales
473175379	11766	Viruses	species	Porcine reproductive and respiratory syndrome virus	28344	11046	1994-01-01	ssRNA viruses	ssRNA positive-strand viruses, no DNA stage					Viruses	Arteriviridae	Arterivirus		Nidovirales
473175401	12197	Viruses	species	Porcine reproductive and respiratory syndrome virus	28344	11046	1994-01-01	ssRNA viruses	ssRNA positive-strand viruses, no DNA stage					Viruses	Arteriviridae	Arterivirus		Nidovirales
473175424	12242	Viruses	species	Porcine reproductive and respiratory syndrome virus	28344	11046	1994-01-01	ssRNA viruses	ssRNA positive-strand viruses, no DNA stage					Viruses	Arteriviridae	Arterivirus		Nidovirales
473175443	12408	Viruses	species	Porcine reproductive and respiratory syndrome virus	28344	11046	1994-01-01	ssRNA viruses	ssRNA positive-strand viruses, no DNA stage					Viruses	Arteriviridae	Arterivirus		Nidovirales
473175458	12352	Viruses	species	Porcine reproductive and respiratory syndrome virus	28344	11046	1994-01-01	ssRNA viruses	ssRNA positive-strand viruses, no DNA stage					Viruses	Arteriviridae	Arterivirus		Nidovirales
473175475	12044	Viruses	species	Porcine reproductive and respiratory syndrome virus	28344	11046	1994-01-01	ssRNA viruses	ssRNA positive-strand viruses, no DNA stage					Viruses	Arteriviridae	Arterivirus		Nidovirales
473175513	12402	Viruses	species	Porcine reproductive and respiratory syndrome virus	28344	11046	1994-01-01	ssRNA viruses	ssRNA positive-strand viruses, no DNA stage					Viruses	Arteriviridae	Arterivirus		Nidovirales
473175552	12581	Viruses	species	Porcine reproductive and respiratory syndrome virus	28344	11046	1994-01-01	ssRNA viruses	ssRNA positive-strand viruses, no DNA stage					Viruses	Arteriviridae	Arterivirus		Nidovirales
473175595	12271	Viruses	species	Porcine reproductive and respiratory syndrome virus	28344	11046	1994-01-01	ssRNA viruses	ssRNA positive-strand viruses, no DNA stage					Viruses	Arteriviridae	Arterivirus		Nidovirales
473175646	12245	Viruses	species	Porcine reproductive and respiratory syndrome virus	28344	11046	1994-01-01	ssRNA viruses	ssRNA positive-strand viruses, no DNA stage					Viruses	Arteriviridae	Arterivirus		Nidovirales
473175700	12619	Viruses	species	Porcine reproductive and respiratory syndrome virus	28344	11046	1994-01-01	ssRNA viruses	ssRNA positive-strand viruses, no DNA stage					Viruses	Arteriviridae	Arterivirus		Nidovirales
478733704	12229	Viruses	species	Porcine reproductive and respiratory syndrome virus	28344	11046	1994-01-01	ssRNA viruses	ssRNA positive-strand viruses, no DNA stage					Viruses	Arteriviridae	Arterivirus		Nidovirales
511774911	11615	Viruses	species	Porcine reproductive and respiratory syndrome virus	28344	11046	1994-01-01	ssRNA viruses	ssRNA positive-strand viruses, no DNA stage					Viruses	Arteriviridae	Arterivirus		Nidovirales
523706944	11508	Viruses	species	Porcine reproductive and respiratory syndrome virus	28344	11046	1994-01-01	ssRNA viruses	ssRNA positive-strand viruses, no DNA stage					Viruses	Arteriviridae	Arterivirus		Nidovirales
523706953	11690	Viruses	species	Porcine reproductive and respiratory syndrome virus	28344	11046	1994-01-01	ssRNA viruses	ssRNA positive-strand viruses, no DNA stage					Viruses	Arteriviridae	Arterivirus		Nidovirales
523706962	11136	Viruses	species	Porcine reproductive and respiratory syndrome virus	28344	11046	1994-01-01	ssRNA viruses	ssRNA positive-strand viruses, no DNA stage					Viruses	Arteriviridae	Arterivirus		Nidovirales
523706971	12170	Viruses	species	Porcine reproductive and respiratory syndrome virus	28344	11046	1994-01-01	ssRNA viruses	ssRNA positive-strand viruses, no DNA stage					Viruses	Arteriviridae	Arterivirus		Nidovirales
523706980	10911	Viruses	species	Porcine reproductive and respiratory syndrome virus	28344	11046	1994-01-01	ssRNA viruses	ssRNA positive-strand viruses, no DNA stage					Viruses	Arteriviridae	Arterivirus		Nidovirales
544388834	15111	Viruses	species	Porcine reproductive and respiratory syndrome virus	28344	11046	1994-01-01	ssRNA viruses	ssRNA positive-strand viruses, no DNA stage					Viruses	Arteriviridae	Arterivirus		Nidovirales
545484316	13086	Viruses	species	Porcine reproductive and respiratory syndrome virus	28344	11046	1994-01-01	ssRNA viruses	ssRNA positive-strand viruses, no DNA stage					Viruses	Arteriviridae	Arterivirus		Nidovirales
545484325	13626	Viruses	species	Porcine reproductive and respiratory syndrome virus	28344	11046	1994-01-01	ssRNA viruses	ssRNA positive-strand viruses, no DNA stage					Viruses	Arteriviridae	Arterivirus		Nidovirales
545484334	13298	Viruses	species	Porcine reproductive and respiratory syndrome virus	28344	11046	1994-01-01	ssRNA viruses	ssRNA positive-strand viruses, no DNA stage					Viruses	Arteriviridae	Arterivirus		Nidovirales
545484343	12554	Viruses	species	Porcine reproductive and respiratory syndrome virus	28344	11046	1994-01-01	ssRNA viruses	ssRNA positive-strand viruses, no DNA stage					Viruses	Arteriviridae	Arterivirus		Nidovirales
545484345	12488	Viruses	species	Porcine reproductive and respiratory syndrome virus	28344	11046	1994-01-01	ssRNA viruses	ssRNA positive-strand viruses, no DNA stage					Viruses	Arteriviridae	Arterivirus		Nidovirales
545484354	13627	Viruses	species	Porcine reproductive and respiratory syndrome virus	28344	11046	1994-01-01	ssRNA viruses	ssRNA positive-strand viruses, no DNA stage					Viruses	Arteriviridae	Arterivirus		Nidovirales
558623448	15098	Viruses	species	Porcine reproductive and respiratory syndrome virus	28344	11046	1994-01-01	ssRNA viruses	ssRNA positive-strand viruses, no DNA stage					Viruses	Arteriviridae	Arterivirus		Nidovirales
558623458	15109	Viruses	species	Porcine reproductive and respiratory syndrome virus	28344	11046	1994-01-01	ssRNA viruses	ssRNA positive-strand viruses, no DNA stage					Viruses	Arteriviridae	Arterivirus		Nidovirales
558623468	15099	Viruses	species	Porcine reproductive and respiratory syndrome virus	28344	11046	1994-01-01	ssRNA viruses	ssRNA positive-strand viruses, no DNA stage					Viruses	Arteriviridae	Arterivirus		Nidovirales
558623478	15111	Viruses	species	Porcine reproductive and respiratory syndrome virus	28344	11046	1994-01-01	ssRNA viruses	ssRNA positive-strand viruses, no DNA stage					Viruses	Arteriviridae	Arterivirus		Nidovirales
558623488	15111	Viruses	species	Porcine reproductive and respiratory syndrome virus	28344	11046	1994-01-01	ssRNA viruses	ssRNA positive-strand viruses, no DNA stage					Viruses	Arteriviridae	Arterivirus		Nidovirales
558623498	15102	Viruses	species	Porcine reproductive and respiratory syndrome virus	28344	11046	1994-01-01	ssRNA viruses	ssRNA positive-strand viruses, no DNA stage					Viruses	Arteriviridae	Arterivirus		Nidovirales
558623508	15087	Viruses	species	Porcine reproductive and respiratory syndrome virus	28344	11046	1994-01-01	ssRNA viruses	ssRNA positive-strand viruses, no DNA stage					Viruses	Arteriviridae	Arterivirus		Nidovirales
558623518	14889	Viruses	species	Porcine reproductive and respiratory syndrome virus	28344	11046	1994-01-01	ssRNA viruses	ssRNA positive-strand viruses, no DNA stage					Viruses	Arteriviridae	Arterivirus		Nidovirales
558623528	14889	Viruses	species	Porcine reproductive and respiratory syndrome virus	28344	11046	1994-01-01	ssRNA viruses	ssRNA positive-strand viruses, no DNA stage					Viruses	Arteriviridae	Arterivirus		Nidovirales
558623544	196	Viruses	species	Porcine reproductive and respiratory syndrome virus	28344	11046	1994-01-01	ssRNA viruses	ssRNA positive-strand viruses, no DNA stage					Viruses	Arteriviridae	Arterivirus		Nidovirales
558623554	213	Viruses	species	Porcine reproductive and respiratory syndrome virus	28344	11046	1994-01-01	ssRNA viruses	ssRNA positive-strand viruses, no DNA stage					Viruses	Arteriviridae	Arterivirus		Nidovirales
558623584	4454	Viruses	species	Porcine reproductive and respiratory syndrome virus	28344	11046	1994-01-01	ssRNA viruses	ssRNA positive-strand viruses, no DNA stage					Viruses	Arteriviridae	Arterivirus		Nidovirales
558623594	120	Viruses	species	Porcine reproductive and respiratory syndrome virus	28344	11046	1994-01-01	ssRNA viruses	ssRNA positive-strand viruses, no DNA stage					Viruses	Arteriviridae	Arterivirus		Nidovirales
558623614	2666	Viruses	species	Porcine reproductive and respiratory syndrome virus	28344	11046	1994-01-01	ssRNA viruses	ssRNA positive-strand viruses, no DNA stage					Viruses	Arteriviridae	Arterivirus		Nidovirales
558623624	338	Viruses	species	Porcine reproductive and respiratory syndrome virus	28344	11046	1994-01-01	ssRNA viruses	ssRNA positive-strand viruses, no DNA stage					Viruses	Arteriviridae	Arterivirus		Nidovirales
558623634	1697	Viruses	species	Porcine reproductive and respiratory syndrome virus	28344	11046	1994-01-01	ssRNA viruses	ssRNA positive-strand viruses, no DNA stage					Viruses	Arteriviridae	Arterivirus		Nidovirales
558623644	2025	Viruses	species	Porcine reproductive and respiratory syndrome virus	28344	11046	1994-01-01	ssRNA viruses	ssRNA positive-strand viruses, no DNA stage					Viruses	Arteriviridae	Arterivirus		Nidovirales
558705790	12722	Viruses	species	Porcine reproductive and respiratory syndrome virus	28344	11046	1994-01-01	ssRNA viruses	ssRNA positive-strand viruses, no DNA stage					Viruses	Arteriviridae	Arterivirus		Nidovirales
558705801	12395	Viruses	species	Porcine reproductive and respiratory syndrome virus	28344	11046	1994-01-01	ssRNA viruses	ssRNA positive-strand viruses, no DNA stage					Viruses	Arteriviridae	Arterivirus		Nidovirales
560220932	11874	Viruses	species	Porcine reproductive and respiratory syndrome virus	28344	11046	1994-01-01	ssRNA viruses	ssRNA positive-strand viruses, no DNA stage					Viruses	Arteriviridae	Arterivirus		Nidovirales
560940863	14497	Viruses	species	Porcine reproductive and respiratory syndrome virus	28344	11046	1994-01-01	ssRNA viruses	ssRNA positive-strand viruses, no DNA stage					Viruses	Arteriviridae	Arterivirus		Nidovirales
575522872	11277	Viruses	species	Porcine reproductive and respiratory syndrome virus	28344	11046	1994-01-01	ssRNA viruses	ssRNA positive-strand viruses, no DNA stage					Viruses	Arteriviridae	Arterivirus		Nidovirales
780375	4865	Viruses	species	African swine fever virus	10497	39743	1993-04-23 01:00:00	dsDNA viruses, no RNA stage						Viruses	Asfarviridae	Asfivirus
9628113	170101	Viruses	species	African swine fever virus	10497	39743	1993-04-23 01:00:00	dsDNA viruses, no RNA stage						Viruses	Asfarviridae	Asfivirus
33772320	99133	Viruses	species	African swine fever virus	10497	39743	1993-04-23 01:00:00	dsDNA viruses, no RNA stage						Viruses	Asfarviridae	Asfivirus
33772321	82011	Viruses	species	African swine fever virus	10497	39743	1993-04-23 01:00:00	dsDNA viruses, no RNA stage						Viruses	Asfarviridae	Asfivirus
33772322	43922	Viruses	species	African swine fever virus	10497	39743	1993-04-23 01:00:00	dsDNA viruses, no RNA stage						Viruses	Asfarviridae	Asfivirus
33772323	55490	Viruses	species	African swine fever virus	10497	39743	1993-04-23 01:00:00	dsDNA viruses, no RNA stage						Viruses	Asfarviridae	Asfivirus
33772324	51560	Viruses	species	African swine fever virus	10497	39743	1993-04-23 01:00:00	dsDNA viruses, no RNA stage						Viruses	Asfarviridae	Asfivirus
33772325	52197	Viruses	species	African swine fever virus	10497	39743	1993-04-23 01:00:00	dsDNA viruses, no RNA stage						Viruses	Asfarviridae	Asfivirus
33772326	50591	Viruses	species	African swine fever virus	10497	39743	1993-04-23 01:00:00	dsDNA viruses, no RNA stage						Viruses	Asfarviridae	Asfivirus
162849209	24363	Viruses	no rank	African swine fever virus Benin 97/1	443876	10497	2007-12-16 18:00:29	dsDNA viruses, no RNA stage						Viruses	Asfarviridae	Asfivirus	African swine fever virus
162849383	16611	Viruses	no rank	African swine fever virus OURT 88/3	443878	10497	2007-12-16 18:00:29	dsDNA viruses, no RNA stage						Viruses	Asfarviridae	Asfivirus	African swine fever virus
291289440	23766	Viruses	no rank	African swine fever virus E75	686262	10497	2010-03-20 18:00:42	dsDNA viruses, no RNA stage						Viruses	Asfarviridae	Asfivirus	African swine fever virus
303398661	48370	Viruses	no rank	African swine fever virus Georgia 2007/1	874269	10497	2010-08-19 18:00:43	dsDNA viruses, no RNA stage						Viruses	Asfarviridae	Asfivirus	African swine fever virus
348158	4356	Viruses	species	Mamastrovirus 1	1239565	249588	1993-08-04 01:00:00	ssRNA viruses	ssRNA positive-strand viruses, no DNA stage					Viruses	Astroviridae	Mamastrovirus
3550941	306	Viruses	no rank	Human astrovirus 1	12456	1239565	1993-08-02 01:00:00	ssRNA viruses	ssRNA positive-strand viruses, no DNA stage					Viruses	Astroviridae	Mamastrovirus	Mamastrovirus 1
4731637	6244	Viruses	species	Mamastrovirus 1	1239565	249588	1993-08-04 01:00:00	ssRNA viruses	ssRNA positive-strand viruses, no DNA stage					Viruses	Astroviridae	Mamastrovirus
9230736	5012	Viruses	no rank	Human astrovirus 8	43358	1239565	1995-10-31 11:20:00	ssRNA viruses	ssRNA positive-strand viruses, no DNA stage					Viruses	Astroviridae	Mamastrovirus	Mamastrovirus 1
9630726	6813	Viruses	species	Mamastrovirus 1	1239565	249588	1993-08-04 01:00:00	ssRNA viruses	ssRNA positive-strand viruses, no DNA stage					Viruses	Astroviridae	Mamastrovirus
9635572	6440	Viruses	species	Mamastrovirus 13	1239577	249588	1997-12-22	ssRNA viruses	ssRNA positive-strand viruses, no DNA stage					Viruses	Astroviridae	Mamastrovirus
9635576	7003	Viruses	species	Turkey astrovirus	70793	336962	1999-12-17	ssRNA viruses	ssRNA positive-strand viruses, no DNA stage	unclassified Avastrovirus				Viruses	Astroviridae	Avastrovirus
20514394	6927	Viruses	species	Chicken astrovirus	336959	336962	2005-08-28 18:01:31	ssRNA viruses	ssRNA positive-strand viruses, no DNA stage	unclassified Avastrovirus				Viruses	Astroviridae	Avastrovirus
28867239	6610	Viruses	species	Mamastrovirus 10	1239574	249588	2003-03-04 18:01:00	ssRNA viruses	ssRNA positive-strand viruses, no DNA stage					Viruses	Astroviridae	Mamastrovirus
45239034	7355	Viruses	no rank	Turkey astrovirus 2	246343	1239439	2004-01-01 18:04:31	ssRNA viruses	ssRNA positive-strand viruses, no DNA stage					Viruses	Astroviridae	Avastrovirus	Avastrovirus 3
57545930	5091	Viruses	no rank	Human astrovirus 4	35300	1239565	1994-03-13	ssRNA viruses	ssRNA positive-strand viruses, no DNA stage					Viruses	Astroviridae	Mamastrovirus	Mamastrovirus 1
57545934	3360	Viruses	no rank	Human astrovirus 1	12456	1239565	1993-08-02 01:00:00	ssRNA viruses	ssRNA positive-strand viruses, no DNA stage					Viruses	Astroviridae	Mamastrovirus	Mamastrovirus 1
66473260	5593	Viruses	no rank	Human astrovirus 5	35741	1239565	1994-12-07	ssRNA viruses	ssRNA positive-strand viruses, no DNA stage					Viruses	Astroviridae	Mamastrovirus	Mamastrovirus 1
68012761	4817	Viruses	no rank	Human astrovirus 4	35300	1239565	1994-03-13	ssRNA viruses	ssRNA positive-strand viruses, no DNA stage					Viruses	Astroviridae	Mamastrovirus	Mamastrovirus 1
84627320	5374	Viruses	no rank	Human astrovirus 4	35300	1239565	1994-03-13	ssRNA viruses	ssRNA positive-strand viruses, no DNA stage					Viruses	Astroviridae	Mamastrovirus	Mamastrovirus 1
160693731	4552	Viruses	species	Avastrovirus 3	1239439	249589	2012-10-04 18:01:01	ssRNA viruses	ssRNA positive-strand viruses, no DNA stage					Viruses	Astroviridae	Avastrovirus
160693735	7339	Viruses	species	Turkey astrovirus	70793	336962	1999-12-17	ssRNA viruses	ssRNA positive-strand viruses, no DNA stage	unclassified Avastrovirus				Viruses	Astroviridae	Avastrovirus
160693739	7343	Viruses	species	Turkey astrovirus	70793	336962	1999-12-17	ssRNA viruses	ssRNA positive-strand viruses, no DNA stage	unclassified Avastrovirus				Viruses	Astroviridae	Avastrovirus
160693743	7343	Viruses	species	Turkey astrovirus	70793	336962	1999-12-17	ssRNA viruses	ssRNA positive-strand viruses, no DNA stage	unclassified Avastrovirus				Viruses	Astroviridae	Avastrovirus
160693747	7352	Viruses	species	Turkey astrovirus	70793	336962	1999-12-17	ssRNA viruses	ssRNA positive-strand viruses, no DNA stage	unclassified Avastrovirus				Viruses	Astroviridae	Avastrovirus
160693751	7351	Viruses	species	Turkey astrovirus	70793	336962	1999-12-17	ssRNA viruses	ssRNA positive-strand viruses, no DNA stage	unclassified Avastrovirus				Viruses	Astroviridae	Avastrovirus
160693755	7346	Viruses	species	Turkey astrovirus	70793	336962	1999-12-17	ssRNA viruses	ssRNA positive-strand viruses, no DNA stage	unclassified Avastrovirus				Viruses	Astroviridae	Avastrovirus
160693759	7346	Viruses	species	Turkey astrovirus	70793	336962	1999-12-17	ssRNA viruses	ssRNA positive-strand viruses, no DNA stage	unclassified Avastrovirus				Viruses	Astroviridae	Avastrovirus
164456819	4601	Viruses	species	Mamastrovirus 1	1239565	249588	1993-08-04 01:00:00	ssRNA viruses	ssRNA positive-strand viruses, no DNA stage					Viruses	Astroviridae	Mamastrovirus
209902360	6171	Viruses	species	Astrovirus MLB1	568715	352926	2008-10-21 18:00:32	ssRNA viruses	ssRNA positive-strand viruses, no DNA stage	unclassified Astroviridae				Viruses	Astroviridae
224466255	2828	Viruses	species	Astrovirus MLB1	568715	352926	2008-10-21 18:00:32	ssRNA viruses	ssRNA positive-strand viruses, no DNA stage	unclassified Astroviridae				Viruses	Astroviridae
225001376	4263	Viruses	no rank	Human astrovirus 1 Beijing/128/2005/CHN	626160	12456	2009-03-21 18:00:37	ssRNA viruses	ssRNA positive-strand viruses, no DNA stage	Human astrovirus 1				Viruses	Astroviridae	Mamastrovirus	Mamastrovirus 1
225001380	3638	Viruses	no rank	Human astrovirus 1 Beijing/176/2006/CHN	626164	12456	2009-03-21 18:00:37	ssRNA viruses	ssRNA positive-strand viruses, no DNA stage	Human astrovirus 1				Viruses	Astroviridae	Mamastrovirus	Mamastrovirus 1
225001384	3856	Viruses	no rank	Human astrovirus 1 Beijing/291/2007/CHN	626180	12456	2009-03-21 18:00:37	ssRNA viruses	ssRNA positive-strand viruses, no DNA stage	Human astrovirus 1				Viruses	Astroviridae	Mamastrovirus	Mamastrovirus 1
225001388	3942	Viruses	no rank	Human astrovirus 1 Beijing/293/2007/CHN	626181	12456	2009-03-21 18:00:37	ssRNA viruses	ssRNA positive-strand viruses, no DNA stage	Human astrovirus 1				Viruses	Astroviridae	Mamastrovirus	Mamastrovirus 1
225676452	7722	Viruses	no rank	Duck astrovirus C-NGB	622438	905828	2009-03-25 18:00:34	ssRNA viruses	ssRNA positive-strand viruses, no DNA stage	unclassified Avastrovirus				Viruses	Astroviridae	Avastrovirus	Duck astrovirus GII.A
237651636	4753	Viruses	species	Mamastrovirus 1	1239565	249588	1993-08-04 01:00:00	ssRNA viruses	ssRNA positive-strand viruses, no DNA stage					Viruses	Astroviridae	Mamastrovirus
255357299	6586	Viruses	species	Astrovirus VA1	645687	352926	2009-08-05 18:00:36	ssRNA viruses	ssRNA positive-strand viruses, no DNA stage	unclassified Astroviridae				Viruses	Astroviridae
259121926	6757	Viruses	no rank	Human astrovirus 6	37130	1239565	1994-11-27	ssRNA viruses	ssRNA positive-strand viruses, no DNA stage					Viruses	Astroviridae	Mamastrovirus	Mamastrovirus 1
262166845	6534	Viruses	species	HMO Astrovirus A	682382	526119	2009-10-15 18:00:38	ssRNA viruses	ssRNA positive-strand viruses, no DNA stage	unclassified Mamastrovirus				Viruses	Astroviridae	Mamastrovirus
284157362	3723	Viruses	no rank	Duck astrovirus 1	707882	905828	2010-06-30 18:00:46	ssRNA viruses	ssRNA positive-strand viruses, no DNA stage	unclassified Avastrovirus				Viruses	Astroviridae	Avastrovirus	Duck astrovirus GII.A
284157366	3587	Viruses	no rank	Duck astrovirus 1	707882	905828	2010-06-30 18:00:46	ssRNA viruses	ssRNA positive-strand viruses, no DNA stage	unclassified Avastrovirus				Viruses	Astroviridae	Avastrovirus	Duck astrovirus GII.A
284157370	4067	Viruses	no rank	Duck astrovirus 1	707882	905828	2010-06-30 18:00:46	ssRNA viruses	ssRNA positive-strand viruses, no DNA stage	unclassified Avastrovirus				Viruses	Astroviridae	Avastrovirus	Duck astrovirus GII.A
284157374	2299	Viruses	no rank	Duck astrovirus 1	707882	905828	2010-06-30 18:00:46	ssRNA viruses	ssRNA positive-strand viruses, no DNA stage	unclassified Avastrovirus				Viruses	Astroviridae	Avastrovirus	Duck astrovirus GII.A
299150754	6772	Viruses	no rank	Human astrovirus 6	37130	1239565	1994-11-27	ssRNA viruses	ssRNA positive-strand viruses, no DNA stage					Viruses	Astroviridae	Mamastrovirus	Mamastrovirus 1
299766659	340	Viruses	no rank	Astrovirus MLB1 HK05	858367	568715	2010-07-03 18:00:44	ssRNA viruses	ssRNA positive-strand viruses, no DNA stage	unclassified Astroviridae				Viruses	Astroviridae		Astrovirus MLB1
313506252	4931	Viruses	species	Mamastrovirus 10	1239574	249588	2003-03-04 18:01:00	ssRNA viruses	ssRNA positive-strand viruses, no DNA stage					Viruses	Astroviridae	Mamastrovirus
313759913	1440	Viruses	no rank	Human astrovirus 1	12456	1239565	1993-08-02 01:00:00	ssRNA viruses	ssRNA positive-strand viruses, no DNA stage					Viruses	Astroviridae	Mamastrovirus	Mamastrovirus 1
345462124	6543	Viruses	species	Mouse astrovirus M-52/USA/2008	1074210	352926	2011-08-15 18:00:53	ssRNA viruses	ssRNA positive-strand viruses, no DNA stage	unclassified Astroviridae				Viruses	Astroviridae
367465397	4557	Viruses	species	Mamastrovirus 1	1239565	249588	1993-08-04 01:00:00	ssRNA viruses	ssRNA positive-strand viruses, no DNA stage					Viruses	Astroviridae	Mamastrovirus
376341991	2829	Viruses	no rank	Human astrovirus 1	12456	1239565	1993-08-02 01:00:00	ssRNA viruses	ssRNA positive-strand viruses, no DNA stage					Viruses	Astroviridae	Mamastrovirus	Mamastrovirus 1
378554472	6707	Viruses	species	Astrovirus wild boar/WBAstV-1/2011/HUN	1137931	526119	2012-02-12 18:00:59	ssRNA viruses	ssRNA positive-strand viruses, no DNA stage	unclassified Mamastrovirus				Viruses	Astroviridae	Mamastrovirus
380035083	6119	Viruses	species	Astrovirus MLB2	683172	352926	2009-10-19 18:00:39	ssRNA viruses	ssRNA positive-strand viruses, no DNA stage	unclassified Astroviridae				Viruses	Astroviridae
380467967	416	Viruses	species	Astrovirus MLB1	568715	352926	2008-10-21 18:00:32	ssRNA viruses	ssRNA positive-strand viruses, no DNA stage	unclassified Astroviridae				Viruses	Astroviridae
380846546	6071	Viruses	no rank	Human astrovirus 5	35741	1239565	1994-12-07	ssRNA viruses	ssRNA positive-strand viruses, no DNA stage					Viruses	Astroviridae	Mamastrovirus	Mamastrovirus 1
407179891	1701	Viruses	species	Murine astrovirus	1141625	352926	2012-03-29 18:00:56	ssRNA viruses	ssRNA positive-strand viruses, no DNA stage	unclassified Astroviridae				Viruses	Astroviridae
407868423	6531	Viruses	species	Astrovirus VA2	683173	352926	2009-10-19 18:00:39	ssRNA viruses	ssRNA positive-strand viruses, no DNA stage	unclassified Astroviridae				Viruses	Astroviridae
407868430	6838	Viruses	species	Murine astrovirus	1141625	352926	2012-03-29 18:00:56	ssRNA viruses	ssRNA positive-strand viruses, no DNA stage	unclassified Astroviridae				Viruses	Astroviridae
410428372	6581	Viruses	species	Astrovirus VA3	683174	352926	2009-10-19 18:00:39	ssRNA viruses	ssRNA positive-strand viruses, no DNA stage	unclassified Astroviridae				Viruses	Astroviridae
410428373	6518	Viruses	species	Astrovirus VA4	1247113	352926	2012-12-04 13:03:10	ssRNA viruses	ssRNA positive-strand viruses, no DNA stage	unclassified Astroviridae				Viruses	Astroviridae
410428374	6124	Viruses	species	Astrovirus MLB3	1247114	352926	2012-12-04 13:03:10	ssRNA viruses	ssRNA positive-strand viruses, no DNA stage	unclassified Astroviridae				Viruses	Astroviridae
422933787	6460	Viruses	species	Porcine astrovirus 3	1254425	526119	2012-12-04 13:03:10	ssRNA viruses	ssRNA positive-strand viruses, no DNA stage	unclassified Mamastrovirus				Viruses	Astroviridae	Mamastrovirus
425856881	121	Viruses	no rank	Duck astrovirus 1	707882	905828	2010-06-30 18:00:46	ssRNA viruses	ssRNA positive-strand viruses, no DNA stage	unclassified Avastrovirus				Viruses	Astroviridae	Avastrovirus	Duck astrovirus GII.A
512386561	432	Viruses	species	Astrovirus MLB1	568715	352926	2008-10-21 18:00:32	ssRNA viruses	ssRNA positive-strand viruses, no DNA stage	unclassified Astroviridae				Viruses	Astroviridae
512386565	413	Viruses	species	Astrovirus MLB1	568715	352926	2008-10-21 18:00:32	ssRNA viruses	ssRNA positive-strand viruses, no DNA stage	unclassified Astroviridae				Viruses	Astroviridae
523453979	118	Viruses	species	Astrovirus MLB2	683172	352926	2009-10-19 18:00:39	ssRNA viruses	ssRNA positive-strand viruses, no DNA stage	unclassified Astroviridae				Viruses	Astroviridae
538602652	6795	Viruses	species	Feline astrovirus 2	1389204	526119	2013-08-28 13:01:55	ssRNA viruses	ssRNA positive-strand viruses, no DNA stage	unclassified Mamastrovirus				Viruses	Astroviridae	Mamastrovirus
542716808	4959	Viruses	no rank	Human astrovirus 2	12701	1239565	1994-03-13	ssRNA viruses	ssRNA positive-strand viruses, no DNA stage					Viruses	Astroviridae	Mamastrovirus	Mamastrovirus 1
542717312	6763	Viruses	no rank	Human astrovirus 2	12701	1239565	1994-03-13	ssRNA viruses	ssRNA positive-strand viruses, no DNA stage					Viruses	Astroviridae	Mamastrovirus	Mamastrovirus 1
542717330	5472	Viruses	no rank	Human astrovirus 4	35300	1239565	1994-03-13	ssRNA viruses	ssRNA positive-strand viruses, no DNA stage					Viruses	Astroviridae	Mamastrovirus	Mamastrovirus 1
542717348	5529	Viruses	no rank	Human astrovirus 4	35300	1239565	1994-03-13	ssRNA viruses	ssRNA positive-strand viruses, no DNA stage					Viruses	Astroviridae	Mamastrovirus	Mamastrovirus 1
548797282	3259	Viruses	no rank	Human astrovirus 1	12456	1239565	1993-08-02 01:00:00	ssRNA viruses	ssRNA positive-strand viruses, no DNA stage					Viruses	Astroviridae	Mamastrovirus	Mamastrovirus 1
556522769	3548	Viruses	no rank	Feline astrovirus Viseu	1413815	1389204	2013-11-12 10:55:03	ssRNA viruses	ssRNA positive-strand viruses, no DNA stage	unclassified Mamastrovirus				Viruses	Astroviridae	Mamastrovirus	Feline astrovirus 2
58691	1789	Viruses	species	Infectious bursal disease virus	10995	39751	1993-04-24 01:00:00	dsRNA viruses						Viruses	Birnaviridae	Avibirnavirus
60444	385	Viruses	no rank	Infectious bursal disease virus CU-1	10998	10995	1993-04-24 01:00:00	dsRNA viruses						Viruses	Birnaviridae	Avibirnavirus	Infectious bursal disease virus
221891	339	Viruses	species	Infectious bursal disease virus	10995	39751	1993-04-24 01:00:00	dsRNA viruses						Viruses	Birnaviridae	Avibirnavirus
221894	223	Viruses	species	Infectious bursal disease virus	10995	39751	1993-04-24 01:00:00	dsRNA viruses						Viruses	Birnaviridae	Avibirnavirus
221910	3104	Viruses	species	Infectious pancreatic necrosis virus	11002	39750	1993-04-24 01:00:00	dsRNA viruses						Viruses	Birnaviridae	Aquabirnavirus
288314	3145	Viruses	species	Infectious bursal disease virus	10995	39751	1993-04-24 01:00:00	dsRNA viruses						Viruses	Birnaviridae	Avibirnavirus
308777	2505	Viruses	species	Infectious bursal disease virus	10995	39751	1993-04-24 01:00:00	dsRNA viruses						Viruses	Birnaviridae	Avibirnavirus
331203	3049	Viruses	species	Infectious bursal disease virus	10995	39751	1993-04-24 01:00:00	dsRNA viruses						Viruses	Birnaviridae	Avibirnavirus
331205	327	Viruses	species	Infectious bursal disease virus	10995	39751	1993-04-24 01:00:00	dsRNA viruses						Viruses	Birnaviridae	Avibirnavirus
331207	2631	Viruses	species	Infectious bursal disease virus	10995	39751	1993-04-24 01:00:00	dsRNA viruses						Viruses	Birnaviridae	Avibirnavirus
331315	2630	Viruses	species	Infectious pancreatic necrosis virus	11002	39750	1993-04-24 01:00:00	dsRNA viruses						Viruses	Birnaviridae	Aquabirnavirus
561660	1970	Viruses	species	Infectious pancreatic necrosis virus	11002	39750	1993-04-24 01:00:00	dsRNA viruses						Viruses	Birnaviridae	Aquabirnavirus
561661	132	Viruses	species	Infectious pancreatic necrosis virus	11002	39750	1993-04-24 01:00:00	dsRNA viruses						Viruses	Birnaviridae	Aquabirnavirus
854197	364	Viruses	species	Infectious bursal disease virus	10995	39751	1993-04-24 01:00:00	dsRNA viruses						Viruses	Birnaviridae	Avibirnavirus
854200	2660	Viruses	species	Infectious bursal disease virus	10995	39751	1993-04-24 01:00:00	dsRNA viruses						Viruses	Birnaviridae	Avibirnavirus
1045305	2755	Viruses	species	Infectious bursal disease virus	10995	39751	1993-04-24 01:00:00	dsRNA viruses						Viruses	Birnaviridae	Avibirnavirus
1469288	3115	Viruses	species	Infectious bursal disease virus	10995	39751	1993-04-24 01:00:00	dsRNA viruses						Viruses	Birnaviridae	Avibirnavirus
1469291	2512	Viruses	species	Infectious bursal disease virus	10995	39751	1993-04-24 01:00:00	dsRNA viruses						Viruses	Birnaviridae	Avibirnavirus
1669530	146	Viruses	species	Infectious bursal disease virus	10995	39751	1993-04-24 01:00:00	dsRNA viruses						Viruses	Birnaviridae	Avibirnavirus
1762324	2962	Viruses	species	Infectious pancreatic necrosis virus	11002	39750	1993-04-24 01:00:00	dsRNA viruses						Viruses	Birnaviridae	Aquabirnavirus
2351392	2615	Viruses	species	Infectious bursal disease virus	10995	39751	1993-04-24 01:00:00	dsRNA viruses						Viruses	Birnaviridae	Avibirnavirus
2588911	108	Viruses	species	Infectious bursal disease virus	10995	39751	1993-04-24 01:00:00	dsRNA viruses						Viruses	Birnaviridae	Avibirnavirus
2920317	300	Viruses	species	Yellowtail ascites virus	59816	39750	1997-05-08 13:20:00	dsRNA viruses						Viruses	Birnaviridae	Aquabirnavirus
2970630	531	Viruses	species	Infectious bursal disease virus	10995	39751	1993-04-24 01:00:00	dsRNA viruses						Viruses	Birnaviridae	Avibirnavirus
3800870	229	Viruses	species	Infectious bursal disease virus	10995	39751	1993-04-24 01:00:00	dsRNA viruses						Viruses	Birnaviridae	Avibirnavirus
3834555	1700	Viruses	species	Infectious pancreatic necrosis virus	11002	39750	1993-04-24 01:00:00	dsRNA viruses						Viruses	Birnaviridae	Aquabirnavirus
3834558	2006	Viruses	species	Infectious pancreatic necrosis virus	11002	39750	1993-04-24 01:00:00	dsRNA viruses						Viruses	Birnaviridae	Aquabirnavirus
4566479	183	Viruses	species	Infectious bursal disease virus	10995	39751	1993-04-24 01:00:00	dsRNA viruses						Viruses	Birnaviridae	Avibirnavirus
4566482	315	Viruses	species	Infectious bursal disease virus	10995	39751	1993-04-24 01:00:00	dsRNA viruses						Viruses	Birnaviridae	Avibirnavirus
4809194	343	Viruses	species	Infectious bursal disease virus	10995	39751	1993-04-24 01:00:00	dsRNA viruses						Viruses	Birnaviridae	Avibirnavirus
4894789	470	Viruses	species	Infectious bursal disease virus	10995	39751	1993-04-24 01:00:00	dsRNA viruses						Viruses	Birnaviridae	Avibirnavirus
4894792	2463	Viruses	species	Infectious bursal disease virus	10995	39751	1993-04-24 01:00:00	dsRNA viruses						Viruses	Birnaviridae	Avibirnavirus
5531907	450	Viruses	species	Infectious bursal disease virus	10995	39751	1993-04-24 01:00:00	dsRNA viruses						Viruses	Birnaviridae	Avibirnavirus
5714661	853	Viruses	species	Infectious bursal disease virus	10995	39751	1993-04-24 01:00:00	dsRNA viruses						Viruses	Birnaviridae	Avibirnavirus
5714664	148	Viruses	species	Infectious bursal disease virus	10995	39751	1993-04-24 01:00:00	dsRNA viruses						Viruses	Birnaviridae	Avibirnavirus
5714667	148	Viruses	species	Infectious bursal disease virus	10995	39751	1993-04-24 01:00:00	dsRNA viruses						Viruses	Birnaviridae	Avibirnavirus
5733932	2634	Viruses	species	Infectious bursal disease virus	10995	39751	1993-04-24 01:00:00	dsRNA viruses						Viruses	Birnaviridae	Avibirnavirus
5733934	121	Viruses	species	Infectious bursal disease virus	10995	39751	1993-04-24 01:00:00	dsRNA viruses						Viruses	Birnaviridae	Avibirnavirus
5733936	110	Viruses	species	Infectious bursal disease virus	10995	39751	1993-04-24 01:00:00	dsRNA viruses						Viruses	Birnaviridae	Avibirnavirus
6539893	299	Viruses	species	Infectious bursal disease virus	10995	39751	1993-04-24 01:00:00	dsRNA viruses						Viruses	Birnaviridae	Avibirnavirus
6539896	2672	Viruses	species	Infectious bursal disease virus	10995	39751	1993-04-24 01:00:00	dsRNA viruses						Viruses	Birnaviridae	Avibirnavirus
9230678	177	Viruses	species	Infectious bursal disease virus	10995	39751	1993-04-24 01:00:00	dsRNA viruses						Viruses	Birnaviridae	Avibirnavirus
9230681	309	Viruses	species	Infectious bursal disease virus	10995	39751	1993-04-24 01:00:00	dsRNA viruses						Viruses	Birnaviridae	Avibirnavirus
9630635	3097	Viruses	species	Infectious pancreatic necrosis virus	11002	39750	1993-04-24 01:00:00	dsRNA viruses						Viruses	Birnaviridae	Aquabirnavirus
9630638	2784	Viruses	species	Infectious pancreatic necrosis virus	11002	39750	1993-04-24 01:00:00	dsRNA viruses						Viruses	Birnaviridae	Aquabirnavirus
11139426	2456	Viruses	species	Infectious bursal disease virus	10995	39751	1993-04-24 01:00:00	dsRNA viruses						Viruses	Birnaviridae	Avibirnavirus
11692803	477	Viruses	species	Infectious bursal disease virus	10995	39751	1993-04-24 01:00:00	dsRNA viruses						Viruses	Birnaviridae	Avibirnavirus
11692806	298	Viruses	species	Infectious bursal disease virus	10995	39751	1993-04-24 01:00:00	dsRNA viruses						Viruses	Birnaviridae	Avibirnavirus
11692809	179	Viruses	species	Infectious bursal disease virus	10995	39751	1993-04-24 01:00:00	dsRNA viruses						Viruses	Birnaviridae	Avibirnavirus
13509240	2641	Viruses	species	Infectious bursal disease virus	10995	39751	1993-04-24 01:00:00	dsRNA viruses						Viruses	Birnaviridae	Avibirnavirus
13516341	515	Viruses	species	Infectious bursal disease virus	10995	39751	1993-04-24 01:00:00	dsRNA viruses						Viruses	Birnaviridae	Avibirnavirus
13991812	140	Viruses	species	Infectious bursal disease virus	10995	39751	1993-04-24 01:00:00	dsRNA viruses						Viruses	Birnaviridae	Avibirnavirus
13991814	2685	Viruses	species	Infectious bursal disease virus	10995	39751	1993-04-24 01:00:00	dsRNA viruses						Viruses	Birnaviridae	Avibirnavirus
14582973	309	Viruses	species	Infectious bursal disease virus	10995	39751	1993-04-24 01:00:00	dsRNA viruses						Viruses	Birnaviridae	Avibirnavirus
14582975	227	Viruses	species	Infectious bursal disease virus	10995	39751	1993-04-24 01:00:00	dsRNA viruses						Viruses	Birnaviridae	Avibirnavirus
14582977	2598	Viruses	species	Infectious bursal disease virus	10995	39751	1993-04-24 01:00:00	dsRNA viruses						Viruses	Birnaviridae	Avibirnavirus
14582979	3144	Viruses	species	Infectious bursal disease virus	10995	39751	1993-04-24 01:00:00	dsRNA viruses						Viruses	Birnaviridae	Avibirnavirus
14582981	2440	Viruses	species	Infectious bursal disease virus	10995	39751	1993-04-24 01:00:00	dsRNA viruses						Viruses	Birnaviridae	Avibirnavirus
14582983	2660	Viruses	species	Infectious bursal disease virus	10995	39751	1993-04-24 01:00:00	dsRNA viruses						Viruses	Birnaviridae	Avibirnavirus
14582985	138	Viruses	species	Infectious bursal disease virus	10995	39751	1993-04-24 01:00:00	dsRNA viruses						Viruses	Birnaviridae	Avibirnavirus
14715595	154	Viruses	species	Infectious bursal disease virus	10995	39751	1993-04-24 01:00:00	dsRNA viruses						Viruses	Birnaviridae	Avibirnavirus
15425534	175	Viruses	species	Infectious bursal disease virus	10995	39751	1993-04-24 01:00:00	dsRNA viruses						Viruses	Birnaviridae	Avibirnavirus
15425536	309	Viruses	species	Infectious bursal disease virus	10995	39751	1993-04-24 01:00:00	dsRNA viruses						Viruses	Birnaviridae	Avibirnavirus
19069999	233	Viruses	species	Infectious bursal disease virus	10995	39751	1993-04-24 01:00:00	dsRNA viruses						Viruses	Birnaviridae	Avibirnavirus
19879323	2595	Viruses	species	Infectious bursal disease virus	10995	39751	1993-04-24 01:00:00	dsRNA viruses						Viruses	Birnaviridae	Avibirnavirus
19879325	179	Viruses	species	Infectious bursal disease virus	10995	39751	1993-04-24 01:00:00	dsRNA viruses						Viruses	Birnaviridae	Avibirnavirus
20136466	2703	Viruses	species	Infectious bursal disease virus	10995	39751	1993-04-24 01:00:00	dsRNA viruses						Viruses	Birnaviridae	Avibirnavirus
20805925	183	Viruses	species	Infectious bursal disease virus	10995	39751	1993-04-24 01:00:00	dsRNA viruses						Viruses	Birnaviridae	Avibirnavirus
21435763	2684	Viruses	species	Infectious bursal disease virus	10995	39751	1993-04-24 01:00:00	dsRNA viruses						Viruses	Birnaviridae	Avibirnavirus
22091619	131	Viruses	species	Infectious bursal disease virus	10995	39751	1993-04-24 01:00:00	dsRNA viruses						Viruses	Birnaviridae	Avibirnavirus
22654955	2711	Viruses	species	Infectious bursal disease virus	10995	39751	1993-04-24 01:00:00	dsRNA viruses						Viruses	Birnaviridae	Avibirnavirus
22671638	273	Viruses	species	Infectious bursal disease virus	10995	39751	1993-04-24 01:00:00	dsRNA viruses						Viruses	Birnaviridae	Avibirnavirus
22671641	114	Viruses	species	Infectious bursal disease virus	10995	39751	1993-04-24 01:00:00	dsRNA viruses						Viruses	Birnaviridae	Avibirnavirus
22671645	383	Viruses	species	Infectious bursal disease virus	10995	39751	1993-04-24 01:00:00	dsRNA viruses						Viruses	Birnaviridae	Avibirnavirus
22770417	2208	Viruses	species	Infectious pancreatic necrosis virus	11002	39750	1993-04-24 01:00:00	dsRNA viruses						Viruses	Birnaviridae	Aquabirnavirus
22855166	3183	Viruses	species	Infectious bursal disease virus	10995	39751	1993-04-24 01:00:00	dsRNA viruses						Viruses	Birnaviridae	Avibirnavirus
22855169	2715	Viruses	species	Infectious bursal disease virus	10995	39751	1993-04-24 01:00:00	dsRNA viruses						Viruses	Birnaviridae	Avibirnavirus
22855189	2976	Viruses	species	Yellowtail ascites virus	59816	39750	1997-05-08 13:20:00	dsRNA viruses						Viruses	Birnaviridae	Aquabirnavirus
22855191	2735	Viruses	species	Yellowtail ascites virus	59816	39750	1997-05-08 13:20:00	dsRNA viruses						Viruses	Birnaviridae	Aquabirnavirus
27461243	288	Viruses	species	Infectious bursal disease virus	10995	39751	1993-04-24 01:00:00	dsRNA viruses						Viruses	Birnaviridae	Avibirnavirus
27463368	263	Viruses	species	Infectious bursal disease virus	10995	39751	1993-04-24 01:00:00	dsRNA viruses						Viruses	Birnaviridae	Avibirnavirus
27463371	2481	Viruses	species	Infectious bursal disease virus	10995	39751	1993-04-24 01:00:00	dsRNA viruses						Viruses	Birnaviridae	Avibirnavirus
27469338	139	Viruses	species	Infectious bursal disease virus	10995	39751	1993-04-24 01:00:00	dsRNA viruses						Viruses	Birnaviridae	Avibirnavirus
32492037	155	Viruses	species	Infectious bursal disease virus	10995	39751	1993-04-24 01:00:00	dsRNA viruses						Viruses	Birnaviridae	Avibirnavirus
34559180	3079	Viruses	species	Infectious pancreatic necrosis virus	11002	39750	1993-04-24 01:00:00	dsRNA viruses						Viruses	Birnaviridae	Aquabirnavirus
34559183	3083	Viruses	species	Infectious pancreatic necrosis virus	11002	39750	1993-04-24 01:00:00	dsRNA viruses						Viruses	Birnaviridae	Aquabirnavirus
34559186	3083	Viruses	species	Infectious pancreatic necrosis virus	11002	39750	1993-04-24 01:00:00	dsRNA viruses						Viruses	Birnaviridae	Aquabirnavirus
34559189	3083	Viruses	species	Infectious pancreatic necrosis virus	11002	39750	1993-04-24 01:00:00	dsRNA viruses						Viruses	Birnaviridae	Aquabirnavirus
34559192	2742	Viruses	species	Infectious pancreatic necrosis virus	11002	39750	1993-04-24 01:00:00	dsRNA viruses						Viruses	Birnaviridae	Aquabirnavirus
34559194	3083	Viruses	species	Infectious pancreatic necrosis virus	11002	39750	1993-04-24 01:00:00	dsRNA viruses						Viruses	Birnaviridae	Aquabirnavirus
34559197	2742	Viruses	species	Infectious pancreatic necrosis virus	11002	39750	1993-04-24 01:00:00	dsRNA viruses						Viruses	Birnaviridae	Aquabirnavirus
34559199	3083	Viruses	species	Infectious pancreatic necrosis virus	11002	39750	1993-04-24 01:00:00	dsRNA viruses						Viruses	Birnaviridae	Aquabirnavirus
34559202	2742	Viruses	species	Infectious pancreatic necrosis virus	11002	39750	1993-04-24 01:00:00	dsRNA viruses						Viruses	Birnaviridae	Aquabirnavirus
34559204	3083	Viruses	species	Infectious pancreatic necrosis virus	11002	39750	1993-04-24 01:00:00	dsRNA viruses						Viruses	Birnaviridae	Aquabirnavirus
34559206	3083	Viruses	species	Infectious pancreatic necrosis virus	11002	39750	1993-04-24 01:00:00	dsRNA viruses						Viruses	Birnaviridae	Aquabirnavirus
38049606	3083	Viruses	species	Infectious pancreatic necrosis virus	11002	39750	1993-04-24 01:00:00	dsRNA viruses						Viruses	Birnaviridae	Aquabirnavirus
38049624	3083	Viruses	species	Infectious pancreatic necrosis virus	11002	39750	1993-04-24 01:00:00	dsRNA viruses						Viruses	Birnaviridae	Aquabirnavirus
38049628	3083	Viruses	species	Infectious pancreatic necrosis virus	11002	39750	1993-04-24 01:00:00	dsRNA viruses						Viruses	Birnaviridae	Aquabirnavirus
38049632	2777	Viruses	species	Infectious pancreatic necrosis virus	11002	39750	1993-04-24 01:00:00	dsRNA viruses						Viruses	Birnaviridae	Aquabirnavirus
38049634	2777	Viruses	species	Infectious pancreatic necrosis virus	11002	39750	1993-04-24 01:00:00	dsRNA viruses						Viruses	Birnaviridae	Aquabirnavirus
38049636	2777	Viruses	species	Infectious pancreatic necrosis virus	11002	39750	1993-04-24 01:00:00	dsRNA viruses						Viruses	Birnaviridae	Aquabirnavirus
38566466	303	Viruses	species	Infectious bursal disease virus	10995	39751	1993-04-24 01:00:00	dsRNA viruses						Viruses	Birnaviridae	Avibirnavirus
38566469	2593	Viruses	species	Infectious bursal disease virus	10995	39751	1993-04-24 01:00:00	dsRNA viruses						Viruses	Birnaviridae	Avibirnavirus
41411195	3082	Viruses	species	Infectious pancreatic necrosis virus	11002	39750	1993-04-24 01:00:00	dsRNA viruses						Viruses	Birnaviridae	Aquabirnavirus
41411197	2782	Viruses	species	Infectious pancreatic necrosis virus	11002	39750	1993-04-24 01:00:00	dsRNA viruses						Viruses	Birnaviridae	Aquabirnavirus
41748319	2685	Viruses	species	Infectious bursal disease virus	10995	39751	1993-04-24 01:00:00	dsRNA viruses						Viruses	Birnaviridae	Avibirnavirus
41748321	2659	Viruses	species	Infectious bursal disease virus	10995	39751	1993-04-24 01:00:00	dsRNA viruses						Viruses	Birnaviridae	Avibirnavirus
41748323	835	Viruses	species	Infectious bursal disease virus	10995	39751	1993-04-24 01:00:00	dsRNA viruses						Viruses	Birnaviridae	Avibirnavirus
41748326	808	Viruses	species	Infectious bursal disease virus	10995	39751	1993-04-24 01:00:00	dsRNA viruses						Viruses	Birnaviridae	Avibirnavirus
46318079	298	Viruses	species	Infectious bursal disease virus	10995	39751	1993-04-24 01:00:00	dsRNA viruses						Viruses	Birnaviridae	Avibirnavirus
50198872	3429	Viruses	species	Blotched snakehead virus	311176	564643	2003-01-03 18:01:00	dsRNA viruses						Viruses	Birnaviridae	Blosnavirus
50234096	2750	Viruses	species	Blotched snakehead virus	311176	564643	2003-01-03 18:01:00	dsRNA viruses						Viruses	Birnaviridae	Blosnavirus
50365979	2743	Viruses	species	Infectious bursal disease virus	10995	39751	1993-04-24 01:00:00	dsRNA viruses						Viruses	Birnaviridae	Avibirnavirus
51242680	2590	Viruses	species	Infectious bursal disease virus	10995	39751	1993-04-24 01:00:00	dsRNA viruses						Viruses	Birnaviridae	Avibirnavirus
51242682	174	Viruses	species	Infectious bursal disease virus	10995	39751	1993-04-24 01:00:00	dsRNA viruses						Viruses	Birnaviridae	Avibirnavirus
55273947	2006	Viruses	species	Infectious pancreatic necrosis virus	11002	39750	1993-04-24 01:00:00	dsRNA viruses						Viruses	Birnaviridae	Aquabirnavirus
55273949	2745	Viruses	species	Infectious pancreatic necrosis virus	11002	39750	1993-04-24 01:00:00	dsRNA viruses						Viruses	Birnaviridae	Aquabirnavirus
55273951	2002	Viruses	species	Infectious pancreatic necrosis virus	11002	39750	1993-04-24 01:00:00	dsRNA viruses						Viruses	Birnaviridae	Aquabirnavirus
55273953	2002	Viruses	species	Infectious pancreatic necrosis virus	11002	39750	1993-04-24 01:00:00	dsRNA viruses						Viruses	Birnaviridae	Aquabirnavirus
55273955	2006	Viruses	species	Infectious pancreatic necrosis virus	11002	39750	1993-04-24 01:00:00	dsRNA viruses						Viruses	Birnaviridae	Aquabirnavirus
55273957	2006	Viruses	species	Infectious pancreatic necrosis virus	11002	39750	1993-04-24 01:00:00	dsRNA viruses						Viruses	Birnaviridae	Aquabirnavirus
55273959	2745	Viruses	species	Infectious pancreatic necrosis virus	11002	39750	1993-04-24 01:00:00	dsRNA viruses						Viruses	Birnaviridae	Aquabirnavirus
55273964	3078	Viruses	species	Infectious pancreatic necrosis virus	11002	39750	1993-04-24 01:00:00	dsRNA viruses						Viruses	Birnaviridae	Aquabirnavirus
56117954	175	Viruses	species	Infectious bursal disease virus	10995	39751	1993-04-24 01:00:00	dsRNA viruses						Viruses	Birnaviridae	Avibirnavirus
60550099	3083	Viruses	species	Infectious pancreatic necrosis virus	11002	39750	1993-04-24 01:00:00	dsRNA viruses						Viruses	Birnaviridae	Aquabirnavirus
60550101	2777	Viruses	species	Infectious pancreatic necrosis virus	11002	39750	1993-04-24 01:00:00	dsRNA viruses						Viruses	Birnaviridae	Aquabirnavirus
62860667	2647	Viruses	species	Infectious bursal disease virus	10995	39751	1993-04-24 01:00:00	dsRNA viruses						Viruses	Birnaviridae	Avibirnavirus
62860669	700	Viruses	species	Infectious bursal disease virus	10995	39751	1993-04-24 01:00:00	dsRNA viruses						Viruses	Birnaviridae	Avibirnavirus
62860672	2648	Viruses	species	Infectious bursal disease virus	10995	39751	1993-04-24 01:00:00	dsRNA viruses						Viruses	Birnaviridae	Avibirnavirus
62860674	732	Viruses	species	Infectious bursal disease virus	10995	39751	1993-04-24 01:00:00	dsRNA viruses						Viruses	Birnaviridae	Avibirnavirus
66394196	1792	Viruses	species	Infectious pancreatic necrosis virus	11002	39750	1993-04-24 01:00:00	dsRNA viruses						Viruses	Birnaviridae	Aquabirnavirus
66394199	1811	Viruses	species	Infectious pancreatic necrosis virus	11002	39750	1993-04-24 01:00:00	dsRNA viruses						Viruses	Birnaviridae	Aquabirnavirus
66394202	1841	Viruses	species	Infectious pancreatic necrosis virus	11002	39750	1993-04-24 01:00:00	dsRNA viruses						Viruses	Birnaviridae	Aquabirnavirus
66394205	1804	Viruses	species	Infectious pancreatic necrosis virus	11002	39750	1993-04-24 01:00:00	dsRNA viruses						Viruses	Birnaviridae	Aquabirnavirus
66394208	1807	Viruses	species	Infectious pancreatic necrosis virus	11002	39750	1993-04-24 01:00:00	dsRNA viruses						Viruses	Birnaviridae	Aquabirnavirus
66394211	1804	Viruses	species	Infectious pancreatic necrosis virus	11002	39750	1993-04-24 01:00:00	dsRNA viruses						Viruses	Birnaviridae	Aquabirnavirus
68235751	473	Viruses	species	Infectious bursal disease virus	10995	39751	1993-04-24 01:00:00	dsRNA viruses						Viruses	Birnaviridae	Avibirnavirus
71003495	120	Viruses	species	Infectious bursal disease virus	10995	39751	1993-04-24 01:00:00	dsRNA viruses						Viruses	Birnaviridae	Avibirnavirus
71068042	309	Viruses	species	Infectious bursal disease virus	10995	39751	1993-04-24 01:00:00	dsRNA viruses						Viruses	Birnaviridae	Avibirnavirus
74054537	308	Viruses	species	Infectious bursal disease virus	10995	39751	1993-04-24 01:00:00	dsRNA viruses						Viruses	Birnaviridae	Avibirnavirus
83764152	1983	Viruses	species	Infectious bursal disease virus	10995	39751	1993-04-24 01:00:00	dsRNA viruses						Viruses	Birnaviridae	Avibirnavirus
84372146	2593	Viruses	species	Infectious bursal disease virus	10995	39751	1993-04-24 01:00:00	dsRNA viruses						Viruses	Birnaviridae	Avibirnavirus
89112096	174	Viruses	species	Infectious bursal disease virus	10995	39751	1993-04-24 01:00:00	dsRNA viruses						Viruses	Birnaviridae	Avibirnavirus
89145880	526	Viruses	species	Infectious bursal disease virus	10995	39751	1993-04-24 01:00:00	dsRNA viruses						Viruses	Birnaviridae	Avibirnavirus
89145883	2590	Viruses	species	Infectious bursal disease virus	10995	39751	1993-04-24 01:00:00	dsRNA viruses						Viruses	Birnaviridae	Avibirnavirus
95116639	3092	Viruses	species	Marine birnavirus	79600	344417	1998-07-24 11:51:00	dsRNA viruses	unclassified Aquabirnavirus					Viruses	Birnaviridae	Aquabirnavirus
95116884	2778	Viruses	species	Marine birnavirus	79600	344417	1998-07-24 11:51:00	dsRNA viruses	unclassified Aquabirnavirus					Viruses	Birnaviridae	Aquabirnavirus
100913603	3048	Viruses	species	Infectious pancreatic necrosis virus	11002	39750	1993-04-24 01:00:00	dsRNA viruses						Viruses	Birnaviridae	Aquabirnavirus
100913606	3048	Viruses	species	Infectious pancreatic necrosis virus	11002	39750	1993-04-24 01:00:00	dsRNA viruses						Viruses	Birnaviridae	Aquabirnavirus
110808608	416	Viruses	species	Infectious bursal disease virus	10995	39751	1993-04-24 01:00:00	dsRNA viruses						Viruses	Birnaviridae	Avibirnavirus
110808610	124	Viruses	species	Infectious bursal disease virus	10995	39751	1993-04-24 01:00:00	dsRNA viruses						Viruses	Birnaviridae	Avibirnavirus
110808612	2529	Viruses	species	Infectious bursal disease virus	10995	39751	1993-04-24 01:00:00	dsRNA viruses						Viruses	Birnaviridae	Avibirnavirus
114153396	133	Viruses	species	Infectious bursal disease virus	10995	39751	1993-04-24 01:00:00	dsRNA viruses						Viruses	Birnaviridae	Avibirnavirus
114864532	548	Viruses	species	Infectious bursal disease virus	10995	39751	1993-04-24 01:00:00	dsRNA viruses						Viruses	Birnaviridae	Avibirnavirus
114864536	2660	Viruses	species	Infectious bursal disease virus	10995	39751	1993-04-24 01:00:00	dsRNA viruses						Viruses	Birnaviridae	Avibirnavirus
116178741	273	Viruses	species	Infectious bursal disease virus	10995	39751	1993-04-24 01:00:00	dsRNA viruses						Viruses	Birnaviridae	Avibirnavirus
116178743	273	Viruses	species	Infectious bursal disease virus	10995	39751	1993-04-24 01:00:00	dsRNA viruses						Viruses	Birnaviridae	Avibirnavirus
117582107	133	Viruses	species	Infectious bursal disease virus	10995	39751	1993-04-24 01:00:00	dsRNA viruses						Viruses	Birnaviridae	Avibirnavirus
118197076	153	Viruses	species	Yellowtail ascites virus	59816	39750	1997-05-08 13:20:00	dsRNA viruses						Viruses	Birnaviridae	Aquabirnavirus
126032562	434	Viruses	species	Infectious bursal disease virus	10995	39751	1993-04-24 01:00:00	dsRNA viruses						Viruses	Birnaviridae	Avibirnavirus
126032564	478	Viruses	species	Infectious bursal disease virus	10995	39751	1993-04-24 01:00:00	dsRNA viruses						Viruses	Birnaviridae	Avibirnavirus
126032566	464	Viruses	species	Infectious bursal disease virus	10995	39751	1993-04-24 01:00:00	dsRNA viruses						Viruses	Birnaviridae	Avibirnavirus
126032568	274	Viruses	species	Infectious bursal disease virus	10995	39751	1993-04-24 01:00:00	dsRNA viruses						Viruses	Birnaviridae	Avibirnavirus
145693790	3056	Viruses	species	Infectious pancreatic necrosis virus	11002	39750	1993-04-24 01:00:00	dsRNA viruses						Viruses	Birnaviridae	Aquabirnavirus
145864612	175	Viruses	species	Infectious bursal disease virus	10995	39751	1993-04-24 01:00:00	dsRNA viruses						Viruses	Birnaviridae	Avibirnavirus
145864615	2592	Viruses	species	Infectious bursal disease virus	10995	39751	1993-04-24 01:00:00	dsRNA viruses						Viruses	Birnaviridae	Avibirnavirus
151936655	2325	Viruses	species	Infectious bursal disease virus	10995	39751	1993-04-24 01:00:00	dsRNA viruses						Viruses	Birnaviridae	Avibirnavirus
154354081	2326	Viruses	species	Infectious bursal disease virus	10995	39751	1993-04-24 01:00:00	dsRNA viruses						Viruses	Birnaviridae	Avibirnavirus
154811067	301	Viruses	species	Infectious bursal disease virus	10995	39751	1993-04-24 01:00:00	dsRNA viruses						Viruses	Birnaviridae	Avibirnavirus
154811070	2608	Viruses	species	Infectious bursal disease virus	10995	39751	1993-04-24 01:00:00	dsRNA viruses						Viruses	Birnaviridae	Avibirnavirus
157886466	179	Viruses	species	Infectious bursal disease virus	10995	39751	1993-04-24 01:00:00	dsRNA viruses						Viruses	Birnaviridae	Avibirnavirus
157886469	484	Viruses	species	Infectious bursal disease virus	10995	39751	1993-04-24 01:00:00	dsRNA viruses						Viruses	Birnaviridae	Avibirnavirus
157931470	322	Viruses	species	Infectious bursal disease virus	10995	39751	1993-04-24 01:00:00	dsRNA viruses						Viruses	Birnaviridae	Avibirnavirus
157931472	443	Viruses	species	Infectious bursal disease virus	10995	39751	1993-04-24 01:00:00	dsRNA viruses						Viruses	Birnaviridae	Avibirnavirus
157931474	2641	Viruses	species	Infectious bursal disease virus	10995	39751	1993-04-24 01:00:00	dsRNA viruses						Viruses	Birnaviridae	Avibirnavirus
157931476	2641	Viruses	species	Infectious bursal disease virus	10995	39751	1993-04-24 01:00:00	dsRNA viruses						Viruses	Birnaviridae	Avibirnavirus
157931478	2641	Viruses	species	Infectious bursal disease virus	10995	39751	1993-04-24 01:00:00	dsRNA viruses						Viruses	Birnaviridae	Avibirnavirus
157931480	2641	Viruses	species	Infectious bursal disease virus	10995	39751	1993-04-24 01:00:00	dsRNA viruses						Viruses	Birnaviridae	Avibirnavirus
157931482	2590	Viruses	species	Infectious bursal disease virus	10995	39751	1993-04-24 01:00:00	dsRNA viruses						Viruses	Birnaviridae	Avibirnavirus
157931484	2641	Viruses	species	Infectious bursal disease virus	10995	39751	1993-04-24 01:00:00	dsRNA viruses						Viruses	Birnaviridae	Avibirnavirus
158324544	3091	Viruses	species	Paralichthys olivaceus birnavirus	475879	344417	2007-10-29 18:00:29	dsRNA viruses	unclassified Aquabirnavirus					Viruses	Birnaviridae	Aquabirnavirus
158324547	2780	Viruses	species	Paralichthys olivaceus birnavirus	475879	344417	2007-10-29 18:00:29	dsRNA viruses	unclassified Aquabirnavirus					Viruses	Birnaviridae	Aquabirnavirus
158426966	2326	Viruses	species	Infectious bursal disease virus	10995	39751	1993-04-24 01:00:00	dsRNA viruses						Viruses	Birnaviridae	Avibirnavirus
161513019	179	Viruses	species	Infectious bursal disease virus	10995	39751	1993-04-24 01:00:00	dsRNA viruses						Viruses	Birnaviridae	Avibirnavirus
161513022	309	Viruses	species	Infectious bursal disease virus	10995	39751	1993-04-24 01:00:00	dsRNA viruses						Viruses	Birnaviridae	Avibirnavirus
171906486	174	Viruses	species	Infectious bursal disease virus	10995	39751	1993-04-24 01:00:00	dsRNA viruses						Viruses	Birnaviridae	Avibirnavirus
171906489	174	Viruses	species	Infectious bursal disease virus	10995	39751	1993-04-24 01:00:00	dsRNA viruses						Viruses	Birnaviridae	Avibirnavirus
171906492	174	Viruses	species	Infectious bursal disease virus	10995	39751	1993-04-24 01:00:00	dsRNA viruses						Viruses	Birnaviridae	Avibirnavirus
171906495	288	Viruses	species	Infectious bursal disease virus	10995	39751	1993-04-24 01:00:00	dsRNA viruses						Viruses	Birnaviridae	Avibirnavirus
171906498	409	Viruses	species	Infectious bursal disease virus	10995	39751	1993-04-24 01:00:00	dsRNA viruses						Viruses	Birnaviridae	Avibirnavirus
171906501	408	Viruses	species	Infectious bursal disease virus	10995	39751	1993-04-24 01:00:00	dsRNA viruses						Viruses	Birnaviridae	Avibirnavirus
171906504	419	Viruses	species	Infectious bursal disease virus	10995	39751	1993-04-24 01:00:00	dsRNA viruses						Viruses	Birnaviridae	Avibirnavirus
171906506	439	Viruses	species	Infectious bursal disease virus	10995	39751	1993-04-24 01:00:00	dsRNA viruses						Viruses	Birnaviridae	Avibirnavirus
171906508	417	Viruses	species	Infectious bursal disease virus	10995	39751	1993-04-24 01:00:00	dsRNA viruses						Viruses	Birnaviridae	Avibirnavirus
171906510	2744	Viruses	species	Infectious bursal disease virus	10995	39751	1993-04-24 01:00:00	dsRNA viruses						Viruses	Birnaviridae	Avibirnavirus
171906512	2702	Viruses	species	Infectious bursal disease virus	10995	39751	1993-04-24 01:00:00	dsRNA viruses						Viruses	Birnaviridae	Avibirnavirus
171906514	2684	Viruses	species	Infectious bursal disease virus	10995	39751	1993-04-24 01:00:00	dsRNA viruses						Viruses	Birnaviridae	Avibirnavirus
187710949	2134	Viruses	no rank	Infectious pancreatic necrosis virus - Mexico	526519	11002	2008-05-12 18:00:21	dsRNA viruses						Viruses	Birnaviridae	Aquabirnavirus	Infectious pancreatic necrosis virus
199582622	2756	Viruses	species	Infectious bursal disease virus	10995	39751	1993-04-24 01:00:00	dsRNA viruses						Viruses	Birnaviridae	Avibirnavirus
219564803	2320	Viruses	species	Infectious bursal disease virus	10995	39751	1993-04-24 01:00:00	dsRNA viruses						Viruses	Birnaviridae	Avibirnavirus
224924196	177	Viruses	species	Infectious bursal disease virus	10995	39751	1993-04-24 01:00:00	dsRNA viruses						Viruses	Birnaviridae	Avibirnavirus
224924199	2827	Viruses	species	Infectious bursal disease virus	10995	39751	1993-04-24 01:00:00	dsRNA viruses						Viruses	Birnaviridae	Avibirnavirus
240017698	682	Viruses	species	Infectious bursal disease virus	10995	39751	1993-04-24 01:00:00	dsRNA viruses						Viruses	Birnaviridae	Avibirnavirus
240017701	401	Viruses	species	Infectious bursal disease virus	10995	39751	1993-04-24 01:00:00	dsRNA viruses						Viruses	Birnaviridae	Avibirnavirus
240017703	174	Viruses	species	Infectious bursal disease virus	10995	39751	1993-04-24 01:00:00	dsRNA viruses						Viruses	Birnaviridae	Avibirnavirus
258598143	2529	Viruses	species	Infectious bursal disease virus	10995	39751	1993-04-24 01:00:00	dsRNA viruses						Viruses	Birnaviridae	Avibirnavirus
270155120	177	Viruses	species	Infectious bursal disease virus	10995	39751	1993-04-24 01:00:00	dsRNA viruses						Viruses	Birnaviridae	Avibirnavirus
270155123	2763	Viruses	species	Infectious bursal disease virus	10995	39751	1993-04-24 01:00:00	dsRNA viruses						Viruses	Birnaviridae	Avibirnavirus
347582743	268	Viruses	species	Infectious bursal disease virus	10995	39751	1993-04-24 01:00:00	dsRNA viruses						Viruses	Birnaviridae	Avibirnavirus
347582746	2635	Viruses	species	Infectious bursal disease virus	10995	39751	1993-04-24 01:00:00	dsRNA viruses						Viruses	Birnaviridae	Avibirnavirus
350543517	110	Viruses	species	Infectious bursal disease virus	10995	39751	1993-04-24 01:00:00	dsRNA viruses						Viruses	Birnaviridae	Avibirnavirus
350543521	2364	Viruses	species	Infectious bursal disease virus	10995	39751	1993-04-24 01:00:00	dsRNA viruses						Viruses	Birnaviridae	Avibirnavirus
350543523	2433	Viruses	species	Infectious bursal disease virus	10995	39751	1993-04-24 01:00:00	dsRNA viruses						Viruses	Birnaviridae	Avibirnavirus
365198777	2304	Viruses	species	Infectious bursal disease virus	10995	39751	1993-04-24 01:00:00	dsRNA viruses						Viruses	Birnaviridae	Avibirnavirus
366091740	3250	Viruses	species	Espirito Santo virus	1127767	41995	2011-12-29 18:00:52	dsRNA viruses	unclassified Birnaviridae					Viruses	Birnaviridae
366091742	3427	Viruses	species	Espirito Santo virus	1127767	41995	2011-12-29 18:00:52	dsRNA viruses	unclassified Birnaviridae					Viruses	Birnaviridae
385139619	2338	Viruses	species	Infectious bursal disease virus	10995	39751	1993-04-24 01:00:00	dsRNA viruses						Viruses	Birnaviridae	Avibirnavirus
385259124	360	Viruses	species	Infectious bursal disease virus	10995	39751	1993-04-24 01:00:00	dsRNA viruses						Viruses	Birnaviridae	Avibirnavirus
385259127	2609	Viruses	species	Infectious bursal disease virus	10995	39751	1993-04-24 01:00:00	dsRNA viruses						Viruses	Birnaviridae	Avibirnavirus
400530105	761	Viruses	species	Infectious bursal disease virus	10995	39751	1993-04-24 01:00:00	dsRNA viruses						Viruses	Birnaviridae	Avibirnavirus
400530108	2463	Viruses	species	Infectious bursal disease virus	10995	39751	1993-04-24 01:00:00	dsRNA viruses						Viruses	Birnaviridae	Avibirnavirus
400530113	2743	Viruses	species	Infectious bursal disease virus	10995	39751	1993-04-24 01:00:00	dsRNA viruses						Viruses	Birnaviridae	Avibirnavirus
9627493	8910	Viruses	species	Borna disease virus	12455	186458	1994-01-06	ssRNA viruses	ssRNA negative-strand viruses					Viruses	Bornaviridae	Bornavirus		Mononegavirales
13488580	717	Viruses	species	Borna disease virus	12455	186458	1994-01-06	ssRNA viruses	ssRNA negative-strand viruses					Viruses	Bornaviridae	Bornavirus		Mononegavirales
15718092	711	Viruses	species	Borna disease virus	12455	186458	1994-01-06	ssRNA viruses	ssRNA negative-strand viruses					Viruses	Bornaviridae	Bornavirus		Mononegavirales
15718106	8866	Viruses	species	Borna disease virus	12455	186458	1994-01-06	ssRNA viruses	ssRNA negative-strand viruses					Viruses	Bornaviridae	Bornavirus		Mononegavirales
22265337	717	Viruses	species	Borna disease virus	12455	186458	1994-01-06	ssRNA viruses	ssRNA negative-strand viruses					Viruses	Bornaviridae	Bornavirus		Mononegavirales
22265344	677	Viruses	species	Borna disease virus	12455	186458	1994-01-06	ssRNA viruses	ssRNA negative-strand viruses					Viruses	Bornaviridae	Bornavirus		Mononegavirales
22265351	677	Viruses	species	Borna disease virus	12455	186458	1994-01-06	ssRNA viruses	ssRNA negative-strand viruses					Viruses	Bornaviridae	Bornavirus		Mononegavirales
195957100	8914	Viruses	species	Borna disease virus	12455	186458	1994-01-06	ssRNA viruses	ssRNA negative-strand viruses					Viruses	Bornaviridae	Bornavirus		Mononegavirales
61926	649	Viruses	species	Rift Valley fever virus	11588	11584	1993-04-24 01:00:00	ssRNA viruses	ssRNA negative-strand viruses					Viruses	Bunyaviridae	Phlebovirus
210733	200	Viruses	no rank	La Crosse virus	11577	35305	1993-04-24 01:00:00	ssRNA viruses	ssRNA negative-strand viruses					Viruses	Bunyaviridae	Orthobunyavirus	California encephalitis virus
210745	4534	Viruses	no rank	Germiston virus	11574	35304	1993-04-28 01:00:00	ssRNA viruses	ssRNA negative-strand viruses					Viruses	Bunyaviridae	Orthobunyavirus	Bunyamwera virus
210747	120	Viruses	no rank	La Crosse virus	11577	35305	1993-04-24 01:00:00	ssRNA viruses	ssRNA negative-strand viruses					Viruses	Bunyaviridae	Orthobunyavirus	California encephalitis virus
221046	2986	Viruses	no rank	La Crosse virus	11577	35305	1993-04-24 01:00:00	ssRNA viruses	ssRNA negative-strand viruses					Viruses	Bunyaviridae	Orthobunyavirus	California encephalitis virus
221492	720	Viruses	no rank	HoJo virus	11583	11599	1993-04-29 01:00:00	ssRNA viruses	ssRNA negative-strand viruses					Viruses	Bunyaviridae	Hantavirus	Hantaan virus
221973	281	Viruses	no rank	Hantaan virus Lee	11601	11599	1993-04-29 01:00:00	ssRNA viruses	ssRNA negative-strand viruses					Viruses	Bunyaviridae	Hantavirus	Hantaan virus
309903	3676	Viruses	species	Puumala virus	11604	11598	1993-04-24 01:00:00	ssRNA viruses	ssRNA negative-strand viruses					Viruses	Bunyaviridae	Hantavirus
323278	1490	Viruses	species	Crimean-Congo hemorrhagic fever virus	11593	11592	1993-04-24 01:00:00	ssRNA viruses	ssRNA negative-strand viruses					Viruses	Bunyaviridae	Nairovirus
325410	3528	Viruses	species	Hantaan virus	11599	11598	1993-04-24 01:00:00	ssRNA viruses	ssRNA negative-strand viruses					Viruses	Bunyaviridae	Hantavirus
325423	1677	Viruses	no rank	Hazara virus	11596	11593	1993-04-24 01:00:00	ssRNA viruses	ssRNA negative-strand viruses					Viruses	Bunyaviridae	Nairovirus	Crimean-Congo hemorrhagic fever virus
333361	6496	Viruses	species	Puumala virus	11604	11598	1993-04-24 01:00:00	ssRNA viruses	ssRNA negative-strand viruses					Viruses	Bunyaviridae	Hantavirus
333362	3456	Viruses	species	Puumala virus	11604	11598	1993-04-24 01:00:00	ssRNA viruses	ssRNA negative-strand viruses					Viruses	Bunyaviridae	Hantavirus
333364	3671	Viruses	species	Puumala virus	11604	11598	1993-04-24 01:00:00	ssRNA viruses	ssRNA negative-strand viruses					Viruses	Bunyaviridae	Hantavirus
334033	1045	Viruses	species	Sandfly fever Sicilian virus	28292	327794	1993-08-03 01:00:00	ssRNA viruses	ssRNA negative-strand viruses	unclassified Phlebovirus				Viruses	Bunyaviridae	Phlebovirus
335017	190	Viruses	no rank	Sapporo rat virus	11607	11608	1993-08-03 01:00:00	ssRNA viruses	ssRNA negative-strand viruses					Viruses	Bunyaviridae	Hantavirus	Seoul virus
335019	121	Viruses	no rank	Sapporo rat virus	11607	11608	1993-08-03 01:00:00	ssRNA viruses	ssRNA negative-strand viruses					Viruses	Bunyaviridae	Hantavirus	Seoul virus
335025	4527	Viruses	no rank	Snowshoe hare virus	11580	35305	1993-08-03 01:00:00	ssRNA viruses	ssRNA negative-strand viruses					Viruses	Bunyaviridae	Orthobunyavirus	California encephalitis virus
335030	808	Viruses	no rank	Snowshoe hare virus	11580	35305	1993-08-03 01:00:00	ssRNA viruses	ssRNA negative-strand viruses					Viruses	Bunyaviridae	Orthobunyavirus	California encephalitis virus
408101	159	Viruses	species	Seoul virus	11608	11598	1993-04-24 01:00:00	ssRNA viruses	ssRNA negative-strand viruses					Viruses	Bunyaviridae	Hantavirus
408102	159	Viruses	species	Seoul virus	11608	11598	1993-04-24 01:00:00	ssRNA viruses	ssRNA negative-strand viruses					Viruses	Bunyaviridae	Hantavirus
408103	176	Viruses	species	Seoul virus	11608	11598	1993-04-24 01:00:00	ssRNA viruses	ssRNA negative-strand viruses					Viruses	Bunyaviridae	Hantavirus
450228	1659	Viruses	species	Crimean-Congo hemorrhagic fever virus	11593	11592	1993-04-24 01:00:00	ssRNA viruses	ssRNA negative-strand viruses					Viruses	Bunyaviridae	Nairovirus
460059	1026	Viruses	species	Puumala virus	11604	11598	1993-04-24 01:00:00	ssRNA viruses	ssRNA negative-strand viruses					Viruses	Bunyaviridae	Hantavirus
460994	1465	Viruses	species	Puumala virus	11604	11598	1993-04-24 01:00:00	ssRNA viruses	ssRNA negative-strand viruses					Viruses	Bunyaviridae	Hantavirus
467707	890	Viruses	no rank	Batai virus	80942	35304	1998-08-13 16:49:00	ssRNA viruses	ssRNA negative-strand viruses					Viruses	Bunyaviridae	Orthobunyavirus	Bunyamwera virus
467710	816	Viruses	no rank	Cache Valley virus	80935	35304	1998-08-13 12:29:00	ssRNA viruses	ssRNA negative-strand viruses					Viruses	Bunyaviridae	Orthobunyavirus	Bunyamwera virus
467719	1077	Viruses	no rank	Lumbo virus	80940	35305	1998-08-13 16:48:00	ssRNA viruses	ssRNA negative-strand viruses					Viruses	Bunyaviridae	Orthobunyavirus	California encephalitis virus
467725	883	Viruses	no rank	Northway virus	80937	35304	1998-08-13 16:48:00	ssRNA viruses	ssRNA negative-strand viruses					Viruses	Bunyaviridae	Orthobunyavirus	Bunyamwera virus
556187	3057	Viruses	no rank	Convict Creek 107 virus	32614	37705	1994-10-08 01:00:00	ssRNA viruses	ssRNA negative-strand viruses					Viruses	Bunyaviridae	Hantavirus	Sin Nombre virus
556188	966	Viruses	species	Dobrava-Belgrade virus	12506	11598	1998-01-11	ssRNA viruses	ssRNA negative-strand viruses					Viruses	Bunyaviridae	Hantavirus
556190	1417	Viruses	no rank	Convict Creek 107 virus	32614	37705	1994-10-08 01:00:00	ssRNA viruses	ssRNA negative-strand viruses					Viruses	Bunyaviridae	Hantavirus	Sin Nombre virus
557857	1622	Viruses	species	Tula virus	37133	11598	1995-11-21	ssRNA viruses	ssRNA negative-strand viruses					Viruses	Bunyaviridae	Hantavirus
557858	1647	Viruses	species	Tula virus	37133	11598	1995-11-21	ssRNA viruses	ssRNA negative-strand viruses					Viruses	Bunyaviridae	Hantavirus
557859	1633	Viruses	species	Tula virus	37133	11598	1995-11-21	ssRNA viruses	ssRNA negative-strand viruses					Viruses	Bunyaviridae	Hantavirus
557860	1578	Viruses	species	Tula virus	37133	11598	1995-11-21	ssRNA viruses	ssRNA negative-strand viruses					Viruses	Bunyaviridae	Hantavirus
557861	1636	Viruses	species	Tula virus	37133	11598	1995-11-21	ssRNA viruses	ssRNA negative-strand viruses					Viruses	Bunyaviridae	Hantavirus
558060	3214	Viruses	no rank	Convict Creek 107 virus	32614	37705	1994-10-08 01:00:00	ssRNA viruses	ssRNA negative-strand viruses					Viruses	Bunyaviridae	Hantavirus	Sin Nombre virus
634073	1026	Viruses	species	Puumala virus	11604	11598	1993-04-24 01:00:00	ssRNA viruses	ssRNA negative-strand viruses					Viruses	Bunyaviridae	Hantavirus
634075	1035	Viruses	species	Puumala virus	11604	11598	1993-04-24 01:00:00	ssRNA viruses	ssRNA negative-strand viruses					Viruses	Bunyaviridae	Hantavirus
634077	957	Viruses	species	Puumala virus	11604	11598	1993-04-24 01:00:00	ssRNA viruses	ssRNA negative-strand viruses					Viruses	Bunyaviridae	Hantavirus
634079	1473	Viruses	species	Puumala virus	11604	11598	1993-04-24 01:00:00	ssRNA viruses	ssRNA negative-strand viruses					Viruses	Bunyaviridae	Hantavirus
634081	1474	Viruses	species	Puumala virus	11604	11598	1993-04-24 01:00:00	ssRNA viruses	ssRNA negative-strand viruses					Viruses	Bunyaviridae	Hantavirus
634083	1476	Viruses	species	Puumala virus	11604	11598	1993-04-24 01:00:00	ssRNA viruses	ssRNA negative-strand viruses					Viruses	Bunyaviridae	Hantavirus
758385	991	Viruses	no rank	Jamestown Canyon virus	35511	35305	1995-04-05 01:00:00	ssRNA viruses	ssRNA negative-strand viruses					Viruses	Bunyaviridae	Orthobunyavirus	California encephalitis virus
758388	902	Viruses	no rank	California encephalitis virus - BFS-283	685450	35305	2009-10-22 18:00:37	ssRNA viruses	ssRNA negative-strand viruses					Viruses	Bunyaviridae	Orthobunyavirus	California encephalitis virus
758397	902	Viruses	species	California encephalitis virus	35305	11572	1993-04-24 01:00:00	ssRNA viruses	ssRNA negative-strand viruses					Viruses	Bunyaviridae	Orthobunyavirus
758400	937	Viruses	no rank	Keystone virus	35514	35305	1995-04-05 01:00:00	ssRNA viruses	ssRNA negative-strand viruses					Viruses	Bunyaviridae	Orthobunyavirus	California encephalitis virus
758406	973	Viruses	no rank	Trivittatus virus	35516	35305	1995-04-05 01:00:00	ssRNA viruses	ssRNA negative-strand viruses					Viruses	Bunyaviridae	Orthobunyavirus	California encephalitis virus
836887	3673	Viruses	species	Puumala virus	11604	11598	1993-04-24 01:00:00	ssRNA viruses	ssRNA negative-strand viruses					Viruses	Bunyaviridae	Hantavirus
912489	3681	Viruses	species	Puumala virus	11604	11598	1993-04-24 01:00:00	ssRNA viruses	ssRNA negative-strand viruses					Viruses	Bunyaviridae	Hantavirus
912491	1829	Viruses	species	Puumala virus	11604	11598	1993-04-24 01:00:00	ssRNA viruses	ssRNA negative-strand viruses					Viruses	Bunyaviridae	Hantavirus
973314	2097	Viruses	species	Sandfly fever Sicilian virus	28292	327794	1993-08-03 01:00:00	ssRNA viruses	ssRNA negative-strand viruses	unclassified Phlebovirus				Viruses	Bunyaviridae	Phlebovirus
996067	764	Viruses	species	Puumala virus	11604	11598	1993-04-24 01:00:00	ssRNA viruses	ssRNA negative-strand viruses					Viruses	Bunyaviridae	Hantavirus
1136202	3647	Viruses	species	Puumala virus	11604	11598	1993-04-24 01:00:00	ssRNA viruses	ssRNA negative-strand viruses					Viruses	Bunyaviridae	Hantavirus
1200157	977	Viruses	no rank	Tahyna virus	45270	35305	1996-01-24 11:29:00	ssRNA viruses	ssRNA negative-strand viruses					Viruses	Bunyaviridae	Orthobunyavirus	California encephalitis virus
1399278	967	Viruses	no rank	Morro Bay virus	42159	35305	1996-07-02 01:00:00	ssRNA viruses	ssRNA negative-strand viruses					Viruses	Bunyaviridae	Orthobunyavirus	California encephalitis virus
1403520	1190	Viruses	species	Puumala virus	11604	11598	1993-04-24 01:00:00	ssRNA viruses	ssRNA negative-strand viruses					Viruses	Bunyaviridae	Hantavirus
1502387	986	Viruses	no rank	Inkoo virus	45269	35305	1996-01-24 11:28:00	ssRNA viruses	ssRNA negative-strand viruses					Viruses	Bunyaviridae	Orthobunyavirus	California encephalitis virus
1502390	987	Viruses	no rank	Inkoo virus	45269	35305	1996-01-24 11:28:00	ssRNA viruses	ssRNA negative-strand viruses					Viruses	Bunyaviridae	Orthobunyavirus	California encephalitis virus
1502393	976	Viruses	no rank	San Angelo virus	45767	35305	1996-08-23 01:00:00	ssRNA viruses	ssRNA negative-strand viruses					Viruses	Bunyaviridae	Orthobunyavirus	California encephalitis virus
1502396	967	Viruses	no rank	Serra do Navio virus	45768	35305	1996-08-23 01:00:00	ssRNA viruses	ssRNA negative-strand viruses					Viruses	Bunyaviridae	Orthobunyavirus	California encephalitis virus
1502402	976	Viruses	no rank	Tahyna virus	45270	35305	1996-01-24 11:29:00	ssRNA viruses	ssRNA negative-strand viruses					Viruses	Bunyaviridae	Orthobunyavirus	California encephalitis virus
1594279	2039	Viruses	no rank	Convict Creek 107 virus	32614	37705	1994-10-08 01:00:00	ssRNA viruses	ssRNA negative-strand viruses					Viruses	Bunyaviridae	Hantavirus	Sin Nombre virus
1857781	1683	Viruses	species	Crimean-Congo hemorrhagic fever virus	11593	11592	1993-04-24 01:00:00	ssRNA viruses	ssRNA negative-strand viruses					Viruses	Bunyaviridae	Nairovirus
1857783	1658	Viruses	species	Crimean-Congo hemorrhagic fever virus	11593	11592	1993-04-24 01:00:00	ssRNA viruses	ssRNA negative-strand viruses					Viruses	Bunyaviridae	Nairovirus
1857785	1370	Viruses	species	Crimean-Congo hemorrhagic fever virus	11593	11592	1993-04-24 01:00:00	ssRNA viruses	ssRNA negative-strand viruses					Viruses	Bunyaviridae	Nairovirus
1857787	1482	Viruses	species	Crimean-Congo hemorrhagic fever virus	11593	11592	1993-04-24 01:00:00	ssRNA viruses	ssRNA negative-strand viruses					Viruses	Bunyaviridae	Nairovirus
1857789	718	Viruses	species	Crimean-Congo hemorrhagic fever virus	11593	11592	1993-04-24 01:00:00	ssRNA viruses	ssRNA negative-strand viruses					Viruses	Bunyaviridae	Nairovirus
1857791	1627	Viruses	species	Crimean-Congo hemorrhagic fever virus	11593	11592	1993-04-24 01:00:00	ssRNA viruses	ssRNA negative-strand viruses					Viruses	Bunyaviridae	Nairovirus
2252779	1052	Viruses	no rank	La Crosse virus	11577	35305	1993-04-24 01:00:00	ssRNA viruses	ssRNA negative-strand viruses					Viruses	Bunyaviridae	Orthobunyavirus	California encephalitis virus
2252781	1075	Viruses	no rank	La Crosse virus	11577	35305	1993-04-24 01:00:00	ssRNA viruses	ssRNA negative-strand viruses					Viruses	Bunyaviridae	Orthobunyavirus	California encephalitis virus
2352476	624	Viruses	species	Andes virus	46607	11598	1997-09-03 01:00:00	ssRNA viruses	ssRNA negative-strand viruses					Viruses	Bunyaviridae	Hantavirus
2463555	364	Viruses	no rank	Tinaroo virus	66264	70566	1997-10-03 01:00:00	ssRNA viruses	ssRNA negative-strand viruses					Viruses	Bunyaviridae	Orthobunyavirus	Akabane virus
2578445	3659	Viruses	species	Puumala virus	11604	11598	1993-04-24 01:00:00	ssRNA viruses	ssRNA negative-strand viruses					Viruses	Bunyaviridae	Hantavirus
2578447	1475	Viruses	species	Puumala virus	11604	11598	1993-04-24 01:00:00	ssRNA viruses	ssRNA negative-strand viruses					Viruses	Bunyaviridae	Hantavirus
2641137	3590	Viruses	no rank	Blue River virus	69294	37705	1997-11-23	ssRNA viruses	ssRNA negative-strand viruses					Viruses	Bunyaviridae	Hantavirus	Sin Nombre virus
2641139	3569	Viruses	no rank	Blue River virus	69294	37705	1997-11-23	ssRNA viruses	ssRNA negative-strand viruses					Viruses	Bunyaviridae	Hantavirus	Sin Nombre virus
2653910	3653	Viruses	no rank	Lechiguanas virus	69245	46607	1997-12-01	ssRNA viruses	ssRNA negative-strand viruses					Viruses	Bunyaviridae	Hantavirus	Andes virus
2653912	3654	Viruses	no rank	Hu39694 virus	69244	46607	1997-12-01	ssRNA viruses	ssRNA negative-strand viruses					Viruses	Bunyaviridae	Hantavirus	Andes virus
2653914	3646	Viruses	no rank	Oran virus	69247	46607	1997-12-01	ssRNA viruses	ssRNA negative-strand viruses					Viruses	Bunyaviridae	Hantavirus	Andes virus
2735138	4506	Viruses	no rank	Inkoo virus	45269	35305	1996-01-24 11:28:00	ssRNA viruses	ssRNA negative-strand viruses					Viruses	Bunyaviridae	Orthobunyavirus	California encephalitis virus
2735140	4506	Viruses	no rank	Inkoo virus	45269	35305	1996-01-24 11:28:00	ssRNA viruses	ssRNA negative-strand viruses					Viruses	Bunyaviridae	Orthobunyavirus	California encephalitis virus
2735142	4510	Viruses	no rank	Jamestown Canyon virus	35511	35305	1995-04-05 01:00:00	ssRNA viruses	ssRNA negative-strand viruses					Viruses	Bunyaviridae	Orthobunyavirus	California encephalitis virus
2735144	4501	Viruses	no rank	Melao virus	35515	35305	1995-04-05 01:00:00	ssRNA viruses	ssRNA negative-strand viruses					Viruses	Bunyaviridae	Orthobunyavirus	California encephalitis virus
3116152	1505	Viruses	species	Tula virus	37133	11598	1995-11-21	ssRNA viruses	ssRNA negative-strand viruses					Viruses	Bunyaviridae	Hantavirus
3116154	1503	Viruses	species	Tula virus	37133	11598	1995-11-21	ssRNA viruses	ssRNA negative-strand viruses					Viruses	Bunyaviridae	Hantavirus
3273549	134	Viruses	no rank	Seoulvirus HB55	72683	11608	1998-07-02 01:00:00	ssRNA viruses	ssRNA negative-strand viruses					Viruses	Bunyaviridae	Hantavirus	Seoul virus
3273551	172	Viruses	no rank	Seoulvirus L99	72684	11608	1998-07-02 01:00:00	ssRNA viruses	ssRNA negative-strand viruses					Viruses	Bunyaviridae	Hantavirus	Seoul virus
3650473	170	Viruses	species	Akabane virus	70566	11572	1998-01-09	ssRNA viruses	ssRNA negative-strand viruses					Viruses	Bunyaviridae	Orthobunyavirus
3650476	170	Viruses	species	Akabane virus	70566	11572	1998-01-09	ssRNA viruses	ssRNA negative-strand viruses					Viruses	Bunyaviridae	Orthobunyavirus
3721997	3549	Viruses	no rank	Hantaan virus A9	73011	11599	1998-10-09 01:00:00	ssRNA viruses	ssRNA negative-strand viruses					Viruses	Bunyaviridae	Hantavirus	Hantaan virus
3860559	1760	Viruses	species	Puumala virus	11604	11598	1993-04-24 01:00:00	ssRNA viruses	ssRNA negative-strand viruses					Viruses	Bunyaviridae	Hantavirus
3970667	1379	Viruses	species	Dobrava-Belgrade virus	12506	11598	1998-01-11	ssRNA viruses	ssRNA negative-strand viruses					Viruses	Bunyaviridae	Hantavirus
3970671	1426	Viruses	species	Dobrava-Belgrade virus	12506	11598	1998-01-11	ssRNA viruses	ssRNA negative-strand viruses					Viruses	Bunyaviridae	Hantavirus
3982558	1376	Viruses	species	Tula virus	37133	11598	1995-11-21	ssRNA viruses	ssRNA negative-strand viruses					Viruses	Bunyaviridae	Hantavirus
4092825	1610	Viruses	species	Dobrava-Belgrade virus	12506	11598	1998-01-11	ssRNA viruses	ssRNA negative-strand viruses					Viruses	Bunyaviridae	Hantavirus
4092827	1610	Viruses	species	Dobrava-Belgrade virus	12506	11598	1998-01-11	ssRNA viruses	ssRNA negative-strand viruses					Viruses	Bunyaviridae	Hantavirus
5030422	3606	Viruses	no rank	Seoulvirus Gou3	93831	11608	1999-05-26 01:00:00	ssRNA viruses	ssRNA negative-strand viruses					Viruses	Bunyaviridae	Hantavirus	Seoul virus
5631305	3615	Viruses	species	Hantaan virus	11599	11598	1993-04-24 01:00:00	ssRNA viruses	ssRNA negative-strand viruses					Viruses	Bunyaviridae	Hantavirus
5731965	4463	Viruses	no rank	Cache Valley virus	80935	35304	1998-08-13 12:29:00	ssRNA viruses	ssRNA negative-strand viruses					Viruses	Bunyaviridae	Orthobunyavirus	Bunyamwera virus
5739095	4305	Viruses	no rank	Cache Valley virus	80935	35304	1998-08-13 12:29:00	ssRNA viruses	ssRNA negative-strand viruses					Viruses	Bunyaviridae	Orthobunyavirus	Bunyamwera virus
5823110	4508	Viruses	species	California encephalitis virus	35305	11572	1993-04-24 01:00:00	ssRNA viruses	ssRNA negative-strand viruses					Viruses	Bunyaviridae	Orthobunyavirus
5823112	4490	Viruses	no rank	Lumbo virus	80940	35305	1998-08-13 16:48:00	ssRNA viruses	ssRNA negative-strand viruses					Viruses	Bunyaviridae	Orthobunyavirus	California encephalitis virus
5823114	4490	Viruses	no rank	Tahyna virus	45270	35305	1996-01-24 11:29:00	ssRNA viruses	ssRNA negative-strand viruses					Viruses	Bunyaviridae	Orthobunyavirus	California encephalitis virus
5823116	4513	Viruses	no rank	San Angelo virus	45767	35305	1996-08-23 01:00:00	ssRNA viruses	ssRNA negative-strand viruses					Viruses	Bunyaviridae	Orthobunyavirus	California encephalitis virus
5823118	4510	Viruses	no rank	Jerry Slough virus	35513	35305	1995-04-05 01:00:00	ssRNA viruses	ssRNA negative-strand viruses					Viruses	Bunyaviridae	Orthobunyavirus	California encephalitis virus
5823120	4509	Viruses	no rank	South River virus	45769	35305	1996-08-23 01:00:00	ssRNA viruses	ssRNA negative-strand viruses					Viruses	Bunyaviridae	Orthobunyavirus	California encephalitis virus
5823122	4544	Viruses	no rank	Keystone virus	35514	35305	1995-04-05 01:00:00	ssRNA viruses	ssRNA negative-strand viruses					Viruses	Bunyaviridae	Orthobunyavirus	California encephalitis virus
5823126	4503	Viruses	no rank	Trivittatus virus	35516	35305	1995-04-05 01:00:00	ssRNA viruses	ssRNA negative-strand viruses					Viruses	Bunyaviridae	Orthobunyavirus	California encephalitis virus
6014593	1727	Viruses	no rank	Seoulvirus Gou3	93831	11608	1999-05-26 01:00:00	ssRNA viruses	ssRNA negative-strand viruses					Viruses	Bunyaviridae	Hantavirus	Seoul virus
6014641	396	Viruses	no rank	Hantavirus Z37	279233	11608	1999-09-23 01:00:00	ssRNA viruses	ssRNA negative-strand viruses					Viruses	Bunyaviridae	Hantavirus	Seoul virus
6407149	1622	Viruses	species	Hantaan virus	11599	11598	1993-04-24 01:00:00	ssRNA viruses	ssRNA negative-strand viruses					Viruses	Bunyaviridae	Hantavirus
6407345	1583	Viruses	species	Hantaan virus	11599	11598	1993-04-24 01:00:00	ssRNA viruses	ssRNA negative-strand viruses					Viruses	Bunyaviridae	Hantavirus
6407387	3594	Viruses	species	Seoul virus	11608	11598	1993-04-24 01:00:00	ssRNA viruses	ssRNA negative-strand viruses					Viruses	Bunyaviridae	Hantavirus
6425154	1552	Viruses	species	Hantaan virus	11599	11598	1993-04-24 01:00:00	ssRNA viruses	ssRNA negative-strand viruses					Viruses	Bunyaviridae	Hantavirus
6456597	385	Viruses	no rank	Hantavirus Z37	279233	11608	1999-09-23 01:00:00	ssRNA viruses	ssRNA negative-strand viruses					Viruses	Bunyaviridae	Hantavirus	Seoul virus
6689077	1235	Viruses	species	Puumala virus	11604	11598	1993-04-24 01:00:00	ssRNA viruses	ssRNA negative-strand viruses					Viruses	Bunyaviridae	Hantavirus
6689079	1273	Viruses	species	Puumala virus	11604	11598	1993-04-24 01:00:00	ssRNA viruses	ssRNA negative-strand viruses					Viruses	Bunyaviridae	Hantavirus
6689081	1051	Viruses	species	Puumala virus	11604	11598	1993-04-24 01:00:00	ssRNA viruses	ssRNA negative-strand viruses					Viruses	Bunyaviridae	Hantavirus
7229123	3626	Viruses	species	Hantaan virus	11599	11598	1993-04-24 01:00:00	ssRNA viruses	ssRNA negative-strand viruses					Viruses	Bunyaviridae	Hantavirus
7960189	4491	Viruses	no rank	Tahyna virus	45270	35305	1996-01-24 11:29:00	ssRNA viruses	ssRNA negative-strand viruses					Viruses	Bunyaviridae	Orthobunyavirus	California encephalitis virus
9630656	6875	Viruses	species	Bunyamwera virus	35304	11572	1993-04-28 01:00:00	ssRNA viruses	ssRNA negative-strand viruses					Viruses	Bunyaviridae	Orthobunyavirus
9630658	4458	Viruses	species	Bunyamwera virus	35304	11572	1993-04-28 01:00:00	ssRNA viruses	ssRNA negative-strand viruses					Viruses	Bunyaviridae	Orthobunyavirus
9630660	961	Viruses	species	Bunyamwera virus	35304	11572	1993-04-28 01:00:00	ssRNA viruses	ssRNA negative-strand viruses					Viruses	Bunyaviridae	Orthobunyavirus
9719049	1051	Viruses	species	Tula virus	37133	11598	1995-11-21	ssRNA viruses	ssRNA negative-strand viruses					Viruses	Bunyaviridae	Hantavirus
9719051	1380	Viruses	species	Tula virus	37133	11598	1995-11-21	ssRNA viruses	ssRNA negative-strand viruses					Viruses	Bunyaviridae	Hantavirus
9944925	317	Viruses	species	Sin Nombre virus	37705	11598	1994-01-28	ssRNA viruses	ssRNA negative-strand viruses					Viruses	Bunyaviridae	Hantavirus
9945029	110	Viruses	species	Seoul virus	11608	11598	1993-04-24 01:00:00	ssRNA viruses	ssRNA negative-strand viruses					Viruses	Bunyaviridae	Hantavirus
9965332	1582	Viruses	no rank	Hantavirus RG9	135736	11599	2000-09-08 12:01:00	ssRNA viruses	ssRNA negative-strand viruses					Viruses	Bunyaviridae	Hantavirus	Hantaan virus
10638944	1447	Viruses	species	Crimean-Congo hemorrhagic fever virus	11593	11592	1993-04-24 01:00:00	ssRNA viruses	ssRNA negative-strand viruses					Viruses	Bunyaviridae	Nairovirus
10638948	1435	Viruses	species	Crimean-Congo hemorrhagic fever virus	11593	11592	1993-04-24 01:00:00	ssRNA viruses	ssRNA negative-strand viruses					Viruses	Bunyaviridae	Nairovirus
11037527	280	Viruses	no rank	Hantavirus Z37	279233	11608	1999-09-23 01:00:00	ssRNA viruses	ssRNA negative-strand viruses					Viruses	Bunyaviridae	Hantavirus	Seoul virus
11066871	281	Viruses	no rank	Seoulvirus L99	72684	11608	1998-07-02 01:00:00	ssRNA viruses	ssRNA negative-strand viruses					Viruses	Bunyaviridae	Hantavirus	Seoul virus
11066873	171	Viruses	no rank	Seoulvirus L99	72684	11608	1998-07-02 01:00:00	ssRNA viruses	ssRNA negative-strand viruses					Viruses	Bunyaviridae	Hantavirus	Seoul virus
12484105	1693	Viruses	species	Hantaan virus	11599	11598	1993-04-24 01:00:00	ssRNA viruses	ssRNA negative-strand viruses					Viruses	Bunyaviridae	Hantavirus
12484107	333	Viruses	species	Hantaan virus	11599	11598	1993-04-24 01:00:00	ssRNA viruses	ssRNA negative-strand viruses					Viruses	Bunyaviridae	Hantavirus
12659335	6501	Viruses	species	Hantaan virus	11599	11598	1993-04-24 01:00:00	ssRNA viruses	ssRNA negative-strand viruses					Viruses	Bunyaviridae	Hantavirus
12659446	1572	Viruses	species	Hantaan virus	11599	11598	1993-04-24 01:00:00	ssRNA viruses	ssRNA negative-strand viruses					Viruses	Bunyaviridae	Hantavirus
12963349	1652	Viruses	species	Andes virus	46607	11598	1997-09-03 01:00:00	ssRNA viruses	ssRNA negative-strand viruses					Viruses	Bunyaviridae	Hantavirus
13173157	624	Viruses	species	Andes virus	46607	11598	1997-09-03 01:00:00	ssRNA viruses	ssRNA negative-strand viruses					Viruses	Bunyaviridae	Hantavirus
13310429	5364	Viruses	no rank	Crimean-Congo hemorrhagic fever virus strain BA88166	154120	11593	2001-03-14 18:01:00	ssRNA viruses	ssRNA negative-strand viruses					Viruses	Bunyaviridae	Nairovirus	Crimean-Congo hemorrhagic fever virus
13660742	1406	Viruses	no rank	Crimean-Congo Hemorrhagic Fever virus strain China	170517	11593	2001-09-17 11:36:00	ssRNA viruses	ssRNA negative-strand viruses					Viruses	Bunyaviridae	Nairovirus	Crimean-Congo hemorrhagic fever virus
13811442	1445	Viruses	no rank	Crimean-Congo Hemorrhagic Fever virus strain China	170517	11593	2001-09-17 11:36:00	ssRNA viruses	ssRNA negative-strand viruses					Viruses	Bunyaviridae	Nairovirus	Crimean-Congo hemorrhagic fever virus
13876787	1426	Viruses	no rank	Crimean-Congo Hemorrhagic Fever virus strain China	170517	11593	2001-09-17 11:36:00	ssRNA viruses	ssRNA negative-strand viruses					Viruses	Bunyaviridae	Nairovirus	Crimean-Congo hemorrhagic fever virus
14028810	1386	Viruses	no rank	Crimean-Congo Hemorrhagic Fever virus strain China	170517	11593	2001-09-17 11:36:00	ssRNA viruses	ssRNA negative-strand viruses					Viruses	Bunyaviridae	Nairovirus	Crimean-Congo hemorrhagic fever virus
14029591	5356	Viruses	species	Crimean-Congo hemorrhagic fever virus	11593	11592	1993-04-24 01:00:00	ssRNA viruses	ssRNA negative-strand viruses					Viruses	Bunyaviridae	Nairovirus
14029593	5360	Viruses	species	Crimean-Congo hemorrhagic fever virus	11593	11592	1993-04-24 01:00:00	ssRNA viruses	ssRNA negative-strand viruses					Viruses	Bunyaviridae	Nairovirus
14091351	3636	Viruses	species	Puumala virus	11604	11598	1993-04-24 01:00:00	ssRNA viruses	ssRNA negative-strand viruses					Viruses	Bunyaviridae	Hantavirus
14091357	1489	Viruses	species	Puumala virus	11604	11598	1993-04-24 01:00:00	ssRNA viruses	ssRNA negative-strand viruses					Viruses	Bunyaviridae	Hantavirus
14091359	1463	Viruses	species	Puumala virus	11604	11598	1993-04-24 01:00:00	ssRNA viruses	ssRNA negative-strand viruses					Viruses	Bunyaviridae	Hantavirus
14091361	1452	Viruses	species	Puumala virus	11604	11598	1993-04-24 01:00:00	ssRNA viruses	ssRNA negative-strand viruses					Viruses	Bunyaviridae	Hantavirus
14091363	1452	Viruses	species	Puumala virus	11604	11598	1993-04-24 01:00:00	ssRNA viruses	ssRNA negative-strand viruses					Viruses	Bunyaviridae	Hantavirus
14091365	1452	Viruses	species	Puumala virus	11604	11598	1993-04-24 01:00:00	ssRNA viruses	ssRNA negative-strand viruses					Viruses	Bunyaviridae	Hantavirus
14091367	1463	Viruses	species	Puumala virus	11604	11598	1993-04-24 01:00:00	ssRNA viruses	ssRNA negative-strand viruses					Viruses	Bunyaviridae	Hantavirus
14091369	1452	Viruses	species	Puumala virus	11604	11598	1993-04-24 01:00:00	ssRNA viruses	ssRNA negative-strand viruses					Viruses	Bunyaviridae	Hantavirus
14091371	1597	Viruses	species	Puumala virus	11604	11598	1993-04-24 01:00:00	ssRNA viruses	ssRNA negative-strand viruses					Viruses	Bunyaviridae	Hantavirus
14537805	1571	Viruses	no rank	Hantaan virus 84FLi	162161	11599	2001-06-26 19:01:00	ssRNA viruses	ssRNA negative-strand viruses					Viruses	Bunyaviridae	Hantavirus	Hantaan virus
14537808	3593	Viruses	no rank	Hantaan virus 84FLi	162161	11599	2001-06-26 19:01:00	ssRNA viruses	ssRNA negative-strand viruses					Viruses	Bunyaviridae	Hantavirus	Hantaan virus
14602467	103	Viruses	species	Oropouche virus	118655	11572	2000-03-27	ssRNA viruses	ssRNA negative-strand viruses					Viruses	Bunyaviridae	Orthobunyavirus
15788940	1472	Viruses	species	Crimean-Congo hemorrhagic fever virus	11593	11592	1993-04-24 01:00:00	ssRNA viruses	ssRNA negative-strand viruses					Viruses	Bunyaviridae	Nairovirus
16271971	110	Viruses	species	Crimean-Congo hemorrhagic fever virus	11593	11592	1993-04-24 01:00:00	ssRNA viruses	ssRNA negative-strand viruses					Viruses	Bunyaviridae	Nairovirus
16506782	6326	Viruses	no rank	Convict Creek 107 virus	32614	37705	1994-10-08 01:00:00	ssRNA viruses	ssRNA negative-strand viruses					Viruses	Bunyaviridae	Hantavirus	Sin Nombre virus
16755738	1310	Viruses	species	Hantaan virus	11599	11598	1993-04-24 01:00:00	ssRNA viruses	ssRNA negative-strand viruses					Viruses	Bunyaviridae	Hantavirus
16755740	1433	Viruses	species	Hantaan virus	11599	11598	1993-04-24 01:00:00	ssRNA viruses	ssRNA negative-strand viruses					Viruses	Bunyaviridae	Hantavirus
16755742	1433	Viruses	species	Hantaan virus	11599	11598	1993-04-24 01:00:00	ssRNA viruses	ssRNA negative-strand viruses					Viruses	Bunyaviridae	Hantavirus
16755746	1640	Viruses	species	Hantaan virus	11599	11598	1993-04-24 01:00:00	ssRNA viruses	ssRNA negative-strand viruses					Viruses	Bunyaviridae	Hantavirus
16755748	1639	Viruses	species	Hantaan virus	11599	11598	1993-04-24 01:00:00	ssRNA viruses	ssRNA negative-strand viruses					Viruses	Bunyaviridae	Hantavirus
16755750	1640	Viruses	species	Hantaan virus	11599	11598	1993-04-24 01:00:00	ssRNA viruses	ssRNA negative-strand viruses					Viruses	Bunyaviridae	Hantavirus
16950544	3594	Viruses	species	Hantaan virus	11599	11598	1993-04-24 01:00:00	ssRNA viruses	ssRNA negative-strand viruses					Viruses	Bunyaviridae	Hantavirus
17149016	1543	Viruses	species	Puumala virus	11604	11598	1993-04-24 01:00:00	ssRNA viruses	ssRNA negative-strand viruses					Viruses	Bunyaviridae	Hantavirus
17149018	3634	Viruses	species	Puumala virus	11604	11598	1993-04-24 01:00:00	ssRNA viruses	ssRNA negative-strand viruses					Viruses	Bunyaviridae	Hantavirus
17149020	3636	Viruses	species	Puumala virus	11604	11598	1993-04-24 01:00:00	ssRNA viruses	ssRNA negative-strand viruses					Viruses	Bunyaviridae	Hantavirus
17149022	3636	Viruses	species	Puumala virus	11604	11598	1993-04-24 01:00:00	ssRNA viruses	ssRNA negative-strand viruses					Viruses	Bunyaviridae	Hantavirus
17149024	3636	Viruses	species	Puumala virus	11604	11598	1993-04-24 01:00:00	ssRNA viruses	ssRNA negative-strand viruses					Viruses	Bunyaviridae	Hantavirus
17149032	1753	Viruses	species	Tula virus	37133	11598	1995-11-21	ssRNA viruses	ssRNA negative-strand viruses					Viruses	Bunyaviridae	Hantavirus
17149034	1315	Viruses	species	Dobrava-Belgrade virus	12506	11598	1998-01-11	ssRNA viruses	ssRNA negative-strand viruses					Viruses	Bunyaviridae	Hantavirus
17224491	157	Viruses	no rank	Seoul virus Hb8610	164246	11608	2001-12-03 18:02:00	ssRNA viruses	ssRNA negative-strand viruses					Viruses	Bunyaviridae	Hantavirus	Seoul virus
17224493	1606	Viruses	no rank	Hantaan virus E142	164247	11599	2001-12-03 18:02:00	ssRNA viruses	ssRNA negative-strand viruses					Viruses	Bunyaviridae	Hantavirus	Hantaan virus
17224495	3610	Viruses	no rank	Hantaan virus A16	164248	11599	2001-12-03 18:02:00	ssRNA viruses	ssRNA negative-strand viruses					Viruses	Bunyaviridae	Hantavirus	Hantaan virus
17224497	1610	Viruses	no rank	Hantaan virus A16	164248	11599	2001-12-03 18:02:00	ssRNA viruses	ssRNA negative-strand viruses					Viruses	Bunyaviridae	Hantavirus	Hantaan virus
17224505	3606	Viruses	no rank	Seoul virus Gou3-e5	164251	11608	2001-12-03 18:02:00	ssRNA viruses	ssRNA negative-strand viruses					Viruses	Bunyaviridae	Hantavirus	Seoul virus
17224507	1698	Viruses	no rank	Hantavirus Gou3-v9	164252	11608	2001-12-03 18:02:00	ssRNA viruses	ssRNA negative-strand viruses					Viruses	Bunyaviridae	Hantavirus	Seoul virus
17224509	400	Viruses	no rank	Seoul virus K24-e7	164253	11608	2001-12-03 18:02:00	ssRNA viruses	ssRNA negative-strand viruses					Viruses	Bunyaviridae	Hantavirus	Seoul virus
17224511	120	Viruses	no rank	Seoul virus K24-e7	164253	11608	2001-12-03 18:02:00	ssRNA viruses	ssRNA negative-strand viruses					Viruses	Bunyaviridae	Hantavirus	Seoul virus
17224513	280	Viruses	no rank	Seoul virus K24-v2	164254	11608	2001-12-03 18:02:00	ssRNA viruses	ssRNA negative-strand viruses					Viruses	Bunyaviridae	Hantavirus	Seoul virus
17224515	120	Viruses	no rank	Seoul virus K24-v2	164254	11608	2001-12-03 18:02:00	ssRNA viruses	ssRNA negative-strand viruses					Viruses	Bunyaviridae	Hantavirus	Seoul virus
17224517	3607	Viruses	no rank	Hantavirus SN7	164255	11599	2001-12-03 18:02:00	ssRNA viruses	ssRNA negative-strand viruses					Viruses	Bunyaviridae	Hantavirus	Hantaan virus
17224519	1580	Viruses	no rank	Hantavirus SN7	164255	11599	2001-12-03 18:02:00	ssRNA viruses	ssRNA negative-strand viruses					Viruses	Bunyaviridae	Hantavirus	Hantaan virus
17225332	863	Viruses	species	Bunyamwera virus	35304	11572	1993-04-28 01:00:00	ssRNA viruses	ssRNA negative-strand viruses					Viruses	Bunyaviridae	Orthobunyavirus
18124162	121	Viruses	no rank	Seoulvirus tchoupitoulas	147454	11608	2002-01-16 18:01:00	ssRNA viruses	ssRNA negative-strand viruses					Viruses	Bunyaviridae	Hantavirus	Seoul virus
18251950	470	Viruses	no rank	Seoulvirus IR461	147455	11608	2002-01-16 18:01:00	ssRNA viruses	ssRNA negative-strand viruses					Viruses	Bunyaviridae	Hantavirus	Seoul virus
18479058	1259	Viruses	species	Dugbe virus	11595	11592	1993-08-02 01:00:00	ssRNA viruses	ssRNA negative-strand viruses					Viruses	Bunyaviridae	Nairovirus
18565072	5368	Viruses	species	Crimean-Congo hemorrhagic fever virus	11593	11592	1993-04-24 01:00:00	ssRNA viruses	ssRNA negative-strand viruses					Viruses	Bunyaviridae	Nairovirus
18565077	5377	Viruses	species	Crimean-Congo hemorrhagic fever virus	11593	11592	1993-04-24 01:00:00	ssRNA viruses	ssRNA negative-strand viruses					Viruses	Bunyaviridae	Nairovirus
18565083	4337	Viruses	species	Crimean-Congo hemorrhagic fever virus	11593	11592	1993-04-24 01:00:00	ssRNA viruses	ssRNA negative-strand viruses					Viruses	Bunyaviridae	Nairovirus
18565087	4473	Viruses	species	Crimean-Congo hemorrhagic fever virus	11593	11592	1993-04-24 01:00:00	ssRNA viruses	ssRNA negative-strand viruses					Viruses	Bunyaviridae	Nairovirus
18565091	5377	Viruses	species	Crimean-Congo hemorrhagic fever virus	11593	11592	1993-04-24 01:00:00	ssRNA viruses	ssRNA negative-strand viruses					Viruses	Bunyaviridae	Nairovirus
18565095	5367	Viruses	species	Crimean-Congo hemorrhagic fever virus	11593	11592	1993-04-24 01:00:00	ssRNA viruses	ssRNA negative-strand viruses					Viruses	Bunyaviridae	Nairovirus
18565099	5367	Viruses	species	Crimean-Congo hemorrhagic fever virus	11593	11592	1993-04-24 01:00:00	ssRNA viruses	ssRNA negative-strand viruses					Viruses	Bunyaviridae	Nairovirus
18677197	611	Viruses	no rank	Yaba-7 virus	159137	70566	2002-02-20 18:01:00	ssRNA viruses	ssRNA negative-strand viruses					Viruses	Bunyaviridae	Orthobunyavirus	Akabane virus
18958561	1663	Viruses	no rank	Bermejo virus	69243	46607	1997-12-01	ssRNA viruses	ssRNA negative-strand viruses					Viruses	Bunyaviridae	Hantavirus	Andes virus
18958563	1644	Viruses	no rank	Lechiguanas virus	69245	46607	1997-12-01	ssRNA viruses	ssRNA negative-strand viruses					Viruses	Bunyaviridae	Hantavirus	Andes virus
18958565	1650	Viruses	no rank	Oran virus	69247	46607	1997-12-01	ssRNA viruses	ssRNA negative-strand viruses					Viruses	Bunyaviridae	Hantavirus	Andes virus
18958567	1864	Viruses	no rank	Maciel virus	69246	46607	1997-12-01	ssRNA viruses	ssRNA negative-strand viruses					Viruses	Bunyaviridae	Hantavirus	Andes virus
18958569	1837	Viruses	no rank	Pergamino virus	69248	46607	1997-12-01	ssRNA viruses	ssRNA negative-strand viruses					Viruses	Bunyaviridae	Hantavirus	Andes virus
19548629	1526	Viruses	species	Crimean-Congo hemorrhagic fever virus	11593	11592	1993-04-24 01:00:00	ssRNA viruses	ssRNA negative-strand viruses					Viruses	Bunyaviridae	Nairovirus
19548635	1661	Viruses	species	Crimean-Congo hemorrhagic fever virus	11593	11592	1993-04-24 01:00:00	ssRNA viruses	ssRNA negative-strand viruses					Viruses	Bunyaviridae	Nairovirus
19744949	1871	Viruses	species	Andes virus	46607	11598	1997-09-03 01:00:00	ssRNA viruses	ssRNA negative-strand viruses					Viruses	Bunyaviridae	Hantavirus
22203736	1451	Viruses	species	Crimean-Congo hemorrhagic fever virus	11593	11592	1993-04-24 01:00:00	ssRNA viruses	ssRNA negative-strand viruses					Viruses	Bunyaviridae	Nairovirus
22208553	148	Viruses	species	Akabane virus	70566	11572	1998-01-09	ssRNA viruses	ssRNA negative-strand viruses					Viruses	Bunyaviridae	Orthobunyavirus
22256023	6980	Viruses	no rank	La Crosse virus	11577	35305	1993-04-24 01:00:00	ssRNA viruses	ssRNA negative-strand viruses					Viruses	Bunyaviridae	Orthobunyavirus	California encephalitis virus
22256025	4527	Viruses	no rank	La Crosse virus	11577	35305	1993-04-24 01:00:00	ssRNA viruses	ssRNA negative-strand viruses					Viruses	Bunyaviridae	Orthobunyavirus	California encephalitis virus
22256027	984	Viruses	no rank	La Crosse virus	11577	35305	1993-04-24 01:00:00	ssRNA viruses	ssRNA negative-strand viruses					Viruses	Bunyaviridae	Orthobunyavirus	California encephalitis virus
22711880	414	Viruses	species	Andes virus	46607	11598	1997-09-03 01:00:00	ssRNA viruses	ssRNA negative-strand viruses					Viruses	Bunyaviridae	Hantavirus
22788698	1716	Viruses	species	Dugbe virus	11595	11592	1993-08-02 01:00:00	ssRNA viruses	ssRNA negative-strand viruses					Viruses	Bunyaviridae	Nairovirus
22788700	4888	Viruses	species	Dugbe virus	11595	11592	1993-08-02 01:00:00	ssRNA viruses	ssRNA negative-strand viruses					Viruses	Bunyaviridae	Nairovirus
22788702	12255	Viruses	species	Dugbe virus	11595	11592	1993-08-02 01:00:00	ssRNA viruses	ssRNA negative-strand viruses					Viruses	Bunyaviridae	Nairovirus
23464593	3671	Viruses	species	Andes virus	46607	11598	1997-09-03 01:00:00	ssRNA viruses	ssRNA negative-strand viruses					Viruses	Bunyaviridae	Hantavirus
23464594	6562	Viruses	species	Andes virus	46607	11598	1997-09-03 01:00:00	ssRNA viruses	ssRNA negative-strand viruses					Viruses	Bunyaviridae	Hantavirus
24743736	3597	Viruses	species	Dobrava-Belgrade virus	12506	11598	1998-01-11	ssRNA viruses	ssRNA negative-strand viruses					Viruses	Bunyaviridae	Hantavirus
27357003	1164	Viruses	species	Dobrava-Belgrade virus	12506	11598	1998-01-11	ssRNA viruses	ssRNA negative-strand viruses					Viruses	Bunyaviridae	Hantavirus
27357005	3628	Viruses	species	Dobrava-Belgrade virus	12506	11598	1998-01-11	ssRNA viruses	ssRNA negative-strand viruses					Viruses	Bunyaviridae	Hantavirus
30271915	1542	Viruses	species	Crimean-Congo hemorrhagic fever virus	11593	11592	1993-04-24 01:00:00	ssRNA viruses	ssRNA negative-strand viruses					Viruses	Bunyaviridae	Nairovirus
30271917	4103	Viruses	species	Crimean-Congo hemorrhagic fever virus	11593	11592	1993-04-24 01:00:00	ssRNA viruses	ssRNA negative-strand viruses					Viruses	Bunyaviridae	Nairovirus
30313861	720	Viruses	species	Andes virus	46607	11598	1997-09-03 01:00:00	ssRNA viruses	ssRNA negative-strand viruses					Viruses	Bunyaviridae	Hantavirus
30313864	470	Viruses	species	Andes virus	46607	11598	1997-09-03 01:00:00	ssRNA viruses	ssRNA negative-strand viruses					Viruses	Bunyaviridae	Hantavirus
30314003	1181	Viruses	species	Andes virus	46607	11598	1997-09-03 01:00:00	ssRNA viruses	ssRNA negative-strand viruses					Viruses	Bunyaviridae	Hantavirus
32693306	1645	Viruses	species	Crimean-Congo hemorrhagic fever virus	11593	11592	1993-04-24 01:00:00	ssRNA viruses	ssRNA negative-strand viruses					Viruses	Bunyaviridae	Nairovirus
33636959	4467	Viruses	no rank	Maguari virus	11575	35304	1993-08-04 01:00:00	ssRNA viruses	ssRNA negative-strand viruses					Viruses	Bunyaviridae	Orthobunyavirus	Bunyamwera virus
33636961	4467	Viruses	no rank	Maguari virus	11575	35304	1993-08-04 01:00:00	ssRNA viruses	ssRNA negative-strand viruses					Viruses	Bunyaviridae	Orthobunyavirus	Bunyamwera virus
33636963	3732	Viruses	no rank	Maguari virus	11575	35304	1993-08-04 01:00:00	ssRNA viruses	ssRNA negative-strand viruses					Viruses	Bunyaviridae	Orthobunyavirus	Bunyamwera virus
33636965	2754	Viruses	no rank	Maguari virus	11575	35304	1993-08-04 01:00:00	ssRNA viruses	ssRNA negative-strand viruses					Viruses	Bunyaviridae	Orthobunyavirus	Bunyamwera virus
37730125	5312	Viruses	species	Crimean-Congo hemorrhagic fever virus	11593	11592	1993-04-24 01:00:00	ssRNA viruses	ssRNA negative-strand viruses					Viruses	Bunyaviridae	Nairovirus
37730127	4758	Viruses	species	Crimean-Congo hemorrhagic fever virus	11593	11592	1993-04-24 01:00:00	ssRNA viruses	ssRNA negative-strand viruses					Viruses	Bunyaviridae	Nairovirus
38232100	3684	Viruses	no rank	Maporal virus	238817	46607	2004-12-16 18:02:43	ssRNA viruses	ssRNA negative-strand viruses					Viruses	Bunyaviridae	Hantavirus	Andes virus
38232205	130	Viruses	species	Crimean-Congo hemorrhagic fever virus	11593	11592	1993-04-24 01:00:00	ssRNA viruses	ssRNA negative-strand viruses					Viruses	Bunyaviridae	Nairovirus
38371701	6423	Viruses	species	Uukuniemi virus	11591	11584	1993-08-03 01:00:00	ssRNA viruses	ssRNA negative-strand viruses					Viruses	Bunyaviridae	Phlebovirus
38371703	3229	Viruses	species	Uukuniemi virus	11591	11584	1993-08-03 01:00:00	ssRNA viruses	ssRNA negative-strand viruses					Viruses	Bunyaviridae	Phlebovirus
38371707	1720	Viruses	species	Uukuniemi virus	11591	11584	1993-08-03 01:00:00	ssRNA viruses	ssRNA negative-strand viruses					Viruses	Bunyaviridae	Phlebovirus
38371710	1696	Viruses	species	Hantaan virus	11599	11598	1993-04-24 01:00:00	ssRNA viruses	ssRNA negative-strand viruses					Viruses	Bunyaviridae	Hantavirus
38371712	3616	Viruses	species	Hantaan virus	11599	11598	1993-04-24 01:00:00	ssRNA viruses	ssRNA negative-strand viruses					Viruses	Bunyaviridae	Hantavirus
38371716	6533	Viruses	species	Hantaan virus	11599	11598	1993-04-24 01:00:00	ssRNA viruses	ssRNA negative-strand viruses					Viruses	Bunyaviridae	Hantavirus
38371718	3682	Viruses	species	Puumala virus	11604	11598	1993-04-24 01:00:00	ssRNA viruses	ssRNA negative-strand viruses					Viruses	Bunyaviridae	Hantavirus
38371720	1830	Viruses	species	Puumala virus	11604	11598	1993-04-24 01:00:00	ssRNA viruses	ssRNA negative-strand viruses					Viruses	Bunyaviridae	Hantavirus
38371722	6550	Viruses	species	Puumala virus	11604	11598	1993-04-24 01:00:00	ssRNA viruses	ssRNA negative-strand viruses					Viruses	Bunyaviridae	Hantavirus
38371723	3696	Viruses	species	Sin Nombre virus	37705	11598	1994-01-28	ssRNA viruses	ssRNA negative-strand viruses					Viruses	Bunyaviridae	Hantavirus
38371725	2059	Viruses	species	Sin Nombre virus	37705	11598	1994-01-28	ssRNA viruses	ssRNA negative-strand viruses					Viruses	Bunyaviridae	Hantavirus
38371727	6562	Viruses	species	Sin Nombre virus	37705	11598	1994-01-28	ssRNA viruses	ssRNA negative-strand viruses					Viruses	Bunyaviridae	Hantavirus
38488686	6541	Viruses	species	Tula virus	37133	11598	1995-11-21	ssRNA viruses	ssRNA negative-strand viruses					Viruses	Bunyaviridae	Hantavirus
38488690	3694	Viruses	species	Tula virus	37133	11598	1995-11-21	ssRNA viruses	ssRNA negative-strand viruses					Viruses	Bunyaviridae	Hantavirus
38505523	1673	Viruses	species	Dobrava-Belgrade virus	12506	11598	1998-01-11	ssRNA viruses	ssRNA negative-strand viruses					Viruses	Bunyaviridae	Hantavirus
38505525	3635	Viruses	species	Dobrava-Belgrade virus	12506	11598	1998-01-11	ssRNA viruses	ssRNA negative-strand viruses					Viruses	Bunyaviridae	Hantavirus
38505527	6532	Viruses	species	Dobrava-Belgrade virus	12506	11598	1998-01-11	ssRNA viruses	ssRNA negative-strand viruses					Viruses	Bunyaviridae	Hantavirus
38505529	1769	Viruses	species	Seoul virus	11608	11598	1993-04-24 01:00:00	ssRNA viruses	ssRNA negative-strand viruses					Viruses	Bunyaviridae	Hantavirus
38505531	3651	Viruses	species	Seoul virus	11608	11598	1993-04-24 01:00:00	ssRNA viruses	ssRNA negative-strand viruses					Viruses	Bunyaviridae	Hantavirus
38505533	6530	Viruses	species	Seoul virus	11608	11598	1993-04-24 01:00:00	ssRNA viruses	ssRNA negative-strand viruses					Viruses	Bunyaviridae	Hantavirus
39573680	3458	Viruses	species	Hantaan virus	11599	11598	1993-04-24 01:00:00	ssRNA viruses	ssRNA negative-strand viruses					Viruses	Bunyaviridae	Hantavirus
39573686	1396	Viruses	species	Hantaan virus	11599	11598	1993-04-24 01:00:00	ssRNA viruses	ssRNA negative-strand viruses					Viruses	Bunyaviridae	Hantavirus
39840949	1672	Viruses	species	Crimean-Congo hemorrhagic fever virus	11593	11592	1993-04-24 01:00:00	ssRNA viruses	ssRNA negative-strand viruses					Viruses	Bunyaviridae	Nairovirus
40644146	1106	Viruses	species	Puumala virus	11604	11598	1993-04-24 01:00:00	ssRNA viruses	ssRNA negative-strand viruses					Viruses	Bunyaviridae	Hantavirus
40644148	1445	Viruses	species	Puumala virus	11604	11598	1993-04-24 01:00:00	ssRNA viruses	ssRNA negative-strand viruses					Viruses	Bunyaviridae	Hantavirus
40644150	1485	Viruses	species	Puumala virus	11604	11598	1993-04-24 01:00:00	ssRNA viruses	ssRNA negative-strand viruses					Viruses	Bunyaviridae	Hantavirus
41052462	1652	Viruses	species	Crimean-Congo hemorrhagic fever virus	11593	11592	1993-04-24 01:00:00	ssRNA viruses	ssRNA negative-strand viruses					Viruses	Bunyaviridae	Nairovirus
41052464	1535	Viruses	species	Crimean-Congo hemorrhagic fever virus	11593	11592	1993-04-24 01:00:00	ssRNA viruses	ssRNA negative-strand viruses					Viruses	Bunyaviridae	Nairovirus
41052466	4554	Viruses	species	Crimean-Congo hemorrhagic fever virus	11593	11592	1993-04-24 01:00:00	ssRNA viruses	ssRNA negative-strand viruses					Viruses	Bunyaviridae	Nairovirus
41052468	5081	Viruses	species	Crimean-Congo hemorrhagic fever virus	11593	11592	1993-04-24 01:00:00	ssRNA viruses	ssRNA negative-strand viruses					Viruses	Bunyaviridae	Nairovirus
42541160	6499	Viruses	species	Puumala virus	11604	11598	1993-04-24 01:00:00	ssRNA viruses	ssRNA negative-strand viruses					Viruses	Bunyaviridae	Hantavirus
42541162	3682	Viruses	species	Puumala virus	11604	11598	1993-04-24 01:00:00	ssRNA viruses	ssRNA negative-strand viruses					Viruses	Bunyaviridae	Hantavirus
42541164	1634	Viruses	species	Puumala virus	11604	11598	1993-04-24 01:00:00	ssRNA viruses	ssRNA negative-strand viruses					Viruses	Bunyaviridae	Hantavirus
44965086	4385	Viruses	species	Oropouche virus	118655	11572	2000-03-27	ssRNA viruses	ssRNA negative-strand viruses					Viruses	Bunyaviridae	Orthobunyavirus
44965093	6846	Viruses	species	Oropouche virus	118655	11572	2000-03-27	ssRNA viruses	ssRNA negative-strand viruses					Viruses	Bunyaviridae	Orthobunyavirus
44965100	754	Viruses	species	Oropouche virus	118655	11572	2000-03-27	ssRNA viruses	ssRNA negative-strand viruses					Viruses	Bunyaviridae	Orthobunyavirus
45332843	1859	Viruses	no rank	Maporal virus	238817	46607	2004-12-16 18:02:43	ssRNA viruses	ssRNA negative-strand viruses					Viruses	Bunyaviridae	Hantavirus	Andes virus
45827675	12102	Viruses	species	Crimean-Congo hemorrhagic fever virus	11593	11592	1993-04-24 01:00:00	ssRNA viruses	ssRNA negative-strand viruses					Viruses	Bunyaviridae	Nairovirus
46811324	4438	Viruses	no rank	Ngari virus	273357	35304	2004-05-04 18:04:21	ssRNA viruses	ssRNA negative-strand viruses					Viruses	Bunyaviridae	Orthobunyavirus	Bunyamwera virus
46811328	763	Viruses	no rank	Mboke virus	273342	35304	2004-05-04 18:04:21	ssRNA viruses	ssRNA negative-strand viruses					Viruses	Bunyaviridae	Orthobunyavirus	Bunyamwera virus
46811333	185	Viruses	no rank	Ngari virus	273357	35304	2004-05-04 18:04:21	ssRNA viruses	ssRNA negative-strand viruses					Viruses	Bunyaviridae	Orthobunyavirus	Bunyamwera virus
51490793	1112	Viruses	species	Sandfly fever Sicilian virus	28292	327794	1993-08-03 01:00:00	ssRNA viruses	ssRNA negative-strand viruses	unclassified Phlebovirus				Viruses	Bunyaviridae	Phlebovirus
52627072	1869	Viruses	species	Sandfly fever Naples virus	206160	11584	2003-02-26 18:01:00	ssRNA viruses	ssRNA negative-strand viruses					Viruses	Bunyaviridae	Phlebovirus
52627075	4215	Viruses	species	Sandfly fever Naples virus	206160	11584	2003-02-26 18:01:00	ssRNA viruses	ssRNA negative-strand viruses					Viruses	Bunyaviridae	Phlebovirus
52673227	6404	Viruses	species	Sandfly fever Naples virus	206160	11584	2003-02-26 18:01:00	ssRNA viruses	ssRNA negative-strand viruses					Viruses	Bunyaviridae	Phlebovirus
54633827	10651	Viruses	species	Crimean-Congo hemorrhagic fever virus	11593	11592	1993-04-24 01:00:00	ssRNA viruses	ssRNA negative-strand viruses					Viruses	Bunyaviridae	Nairovirus
55733701	1701	Viruses	species	Hantavirus Z10	93830	339351	1999-05-26 01:00:00	ssRNA viruses	ssRNA negative-strand viruses	unclassified Hantavirus				Viruses	Bunyaviridae	Hantavirus
55733703	6533	Viruses	species	Hantavirus Z10	93830	339351	1999-05-26 01:00:00	ssRNA viruses	ssRNA negative-strand viruses	unclassified Hantavirus				Viruses	Bunyaviridae	Hantavirus
55733705	3616	Viruses	species	Hantavirus Z10	93830	339351	1999-05-26 01:00:00	ssRNA viruses	ssRNA negative-strand viruses	unclassified Hantavirus				Viruses	Bunyaviridae	Hantavirus
56122593	12035	Viruses	species	Crimean-Congo hemorrhagic fever virus	11593	11592	1993-04-24 01:00:00	ssRNA viruses	ssRNA negative-strand viruses					Viruses	Bunyaviridae	Nairovirus
56555498	5341	Viruses	species	Crimean-Congo hemorrhagic fever virus	11593	11592	1993-04-24 01:00:00	ssRNA viruses	ssRNA negative-strand viruses					Viruses	Bunyaviridae	Nairovirus
56607100	1645	Viruses	species	Crimean-Congo hemorrhagic fever virus	11593	11592	1993-04-24 01:00:00	ssRNA viruses	ssRNA negative-strand viruses					Viruses	Bunyaviridae	Nairovirus
56608598	1611	Viruses	species	Hantaan virus	11599	11598	1993-04-24 01:00:00	ssRNA viruses	ssRNA negative-strand viruses					Viruses	Bunyaviridae	Hantavirus
58003959	757	Viruses	no rank	Ilesha virus	273341	35304	2004-05-12 18:01:10	ssRNA viruses	ssRNA negative-strand viruses					Viruses	Bunyaviridae	Orthobunyavirus	Bunyamwera virus
58272376	3504	Viruses	no rank	Hantavirus strain CJilin93	310790	11599	2005-10-01 18:00:13	ssRNA viruses	ssRNA negative-strand viruses					Viruses	Bunyaviridae	Hantavirus	Hantaan virus
58272378	1611	Viruses	no rank	Hantavirus strain YU61	310791	11599	2005-10-01 18:00:13	ssRNA viruses	ssRNA negative-strand viruses					Viruses	Bunyaviridae	Hantavirus	Hantaan virus
58272380	1611	Viruses	species	Hantaan virus	11599	11598	1993-04-24 01:00:00	ssRNA viruses	ssRNA negative-strand viruses					Viruses	Bunyaviridae	Hantavirus
59380665	451	Viruses	species	Crimean-Congo hemorrhagic fever virus	11593	11592	1993-04-24 01:00:00	ssRNA viruses	ssRNA negative-strand viruses					Viruses	Bunyaviridae	Nairovirus
59380667	2386	Viruses	species	Crimean-Congo hemorrhagic fever virus	11593	11592	1993-04-24 01:00:00	ssRNA viruses	ssRNA negative-strand viruses					Viruses	Bunyaviridae	Nairovirus
59380669	5100	Viruses	species	Crimean-Congo hemorrhagic fever virus	11593	11592	1993-04-24 01:00:00	ssRNA viruses	ssRNA negative-strand viruses					Viruses	Bunyaviridae	Nairovirus
59380671	4242	Viruses	species	Crimean-Congo hemorrhagic fever virus	11593	11592	1993-04-24 01:00:00	ssRNA viruses	ssRNA negative-strand viruses					Viruses	Bunyaviridae	Nairovirus
59380673	5070	Viruses	species	Crimean-Congo hemorrhagic fever virus	11593	11592	1993-04-24 01:00:00	ssRNA viruses	ssRNA negative-strand viruses					Viruses	Bunyaviridae	Nairovirus
60280372	146	Viruses	species	Crimean-Congo hemorrhagic fever virus	11593	11592	1993-04-24 01:00:00	ssRNA viruses	ssRNA negative-strand viruses					Viruses	Bunyaviridae	Nairovirus
61677759	4406	Viruses	no rank	Ilesha virus	273341	35304	2004-05-12 18:01:10	ssRNA viruses	ssRNA negative-strand viruses					Viruses	Bunyaviridae	Orthobunyavirus	Bunyamwera virus
62997547	11904	Viruses	species	Crimean-Congo hemorrhagic fever virus	11593	11592	1993-04-24 01:00:00	ssRNA viruses	ssRNA negative-strand viruses					Viruses	Bunyaviridae	Nairovirus
62997549	146	Viruses	species	Crimean-Congo hemorrhagic fever virus	11593	11592	1993-04-24 01:00:00	ssRNA viruses	ssRNA negative-strand viruses					Viruses	Bunyaviridae	Nairovirus
63030012	1534	Viruses	species	Dobrava-Belgrade virus	12506	11598	1998-01-11	ssRNA viruses	ssRNA negative-strand viruses					Viruses	Bunyaviridae	Hantavirus
63030014	3630	Viruses	species	Dobrava-Belgrade virus	12506	11598	1998-01-11	ssRNA viruses	ssRNA negative-strand viruses					Viruses	Bunyaviridae	Hantavirus
63030018	1534	Viruses	species	Dobrava-Belgrade virus	12506	11598	1998-01-11	ssRNA viruses	ssRNA negative-strand viruses					Viruses	Bunyaviridae	Hantavirus
66932911	1486	Viruses	species	Dobrava-Belgrade virus	12506	11598	1998-01-11	ssRNA viruses	ssRNA negative-strand viruses					Viruses	Bunyaviridae	Hantavirus
66932913	1534	Viruses	species	Dobrava-Belgrade virus	12506	11598	1998-01-11	ssRNA viruses	ssRNA negative-strand viruses					Viruses	Bunyaviridae	Hantavirus
71483096	1645	Viruses	species	Crimean-Congo hemorrhagic fever virus	11593	11592	1993-04-24 01:00:00	ssRNA viruses	ssRNA negative-strand viruses					Viruses	Bunyaviridae	Nairovirus
71648470	11838	Viruses	species	Crimean-Congo hemorrhagic fever virus	11593	11592	1993-04-24 01:00:00	ssRNA viruses	ssRNA negative-strand viruses					Viruses	Bunyaviridae	Nairovirus
71648472	1581	Viruses	species	Crimean-Congo hemorrhagic fever virus	11593	11592	1993-04-24 01:00:00	ssRNA viruses	ssRNA negative-strand viruses					Viruses	Bunyaviridae	Nairovirus
71648474	4225	Viruses	species	Crimean-Congo hemorrhagic fever virus	11593	11592	1993-04-24 01:00:00	ssRNA viruses	ssRNA negative-strand viruses					Viruses	Bunyaviridae	Nairovirus
71648476	621	Viruses	species	Crimean-Congo hemorrhagic fever virus	11593	11592	1993-04-24 01:00:00	ssRNA viruses	ssRNA negative-strand viruses					Viruses	Bunyaviridae	Nairovirus
71648478	621	Viruses	species	Crimean-Congo hemorrhagic fever virus	11593	11592	1993-04-24 01:00:00	ssRNA viruses	ssRNA negative-strand viruses					Viruses	Bunyaviridae	Nairovirus
71648480	4240	Viruses	species	Crimean-Congo hemorrhagic fever virus	11593	11592	1993-04-24 01:00:00	ssRNA viruses	ssRNA negative-strand viruses					Viruses	Bunyaviridae	Nairovirus
71648484	11980	Viruses	no rank	Hazara virus	11596	11593	1993-04-24 01:00:00	ssRNA viruses	ssRNA negative-strand viruses					Viruses	Bunyaviridae	Nairovirus	Crimean-Congo hemorrhagic fever virus
72255747	10726	Viruses	species	Crimean-Congo hemorrhagic fever virus	11593	11592	1993-04-24 01:00:00	ssRNA viruses	ssRNA negative-strand viruses					Viruses	Bunyaviridae	Nairovirus
73810193	120	Viruses	species	Seoul virus	11608	11598	1993-04-24 01:00:00	ssRNA viruses	ssRNA negative-strand viruses					Viruses	Bunyaviridae	Hantavirus
74039637	5387	Viruses	species	Crimean-Congo hemorrhagic fever virus	11593	11592	1993-04-24 01:00:00	ssRNA viruses	ssRNA negative-strand viruses					Viruses	Bunyaviridae	Nairovirus
75860490	5367	Viruses	species	Crimean-Congo hemorrhagic fever virus	11593	11592	1993-04-24 01:00:00	ssRNA viruses	ssRNA negative-strand viruses					Viruses	Bunyaviridae	Nairovirus
75905471	5366	Viruses	species	Crimean-Congo hemorrhagic fever virus	11593	11592	1993-04-24 01:00:00	ssRNA viruses	ssRNA negative-strand viruses					Viruses	Bunyaviridae	Nairovirus
76097088	649	Viruses	species	Crimean-Congo hemorrhagic fever virus	11593	11592	1993-04-24 01:00:00	ssRNA viruses	ssRNA negative-strand viruses					Viruses	Bunyaviridae	Nairovirus
76097090	454	Viruses	species	Crimean-Congo hemorrhagic fever virus	11593	11592	1993-04-24 01:00:00	ssRNA viruses	ssRNA negative-strand viruses					Viruses	Bunyaviridae	Nairovirus
76364065	12108	Viruses	species	Crimean-Congo hemorrhagic fever virus	11593	11592	1993-04-24 01:00:00	ssRNA viruses	ssRNA negative-strand viruses					Viruses	Bunyaviridae	Nairovirus
76365796	1641	Viruses	species	Crimean-Congo hemorrhagic fever virus	11593	11592	1993-04-24 01:00:00	ssRNA viruses	ssRNA negative-strand viruses					Viruses	Bunyaviridae	Nairovirus
77994346	1555	Viruses	species	Crimean-Congo hemorrhagic fever virus	11593	11592	1993-04-24 01:00:00	ssRNA viruses	ssRNA negative-strand viruses					Viruses	Bunyaviridae	Nairovirus
77994348	1555	Viruses	species	Crimean-Congo hemorrhagic fever virus	11593	11592	1993-04-24 01:00:00	ssRNA viruses	ssRNA negative-strand viruses					Viruses	Bunyaviridae	Nairovirus
78191698	12170	Viruses	species	Crimean-Congo hemorrhagic fever virus	11593	11592	1993-04-24 01:00:00	ssRNA viruses	ssRNA negative-strand viruses					Viruses	Bunyaviridae	Nairovirus
78191700	155	Viruses	species	Crimean-Congo hemorrhagic fever virus	11593	11592	1993-04-24 01:00:00	ssRNA viruses	ssRNA negative-strand viruses					Viruses	Bunyaviridae	Nairovirus
78191702	159	Viruses	species	Crimean-Congo hemorrhagic fever virus	11593	11592	1993-04-24 01:00:00	ssRNA viruses	ssRNA negative-strand viruses					Viruses	Bunyaviridae	Nairovirus
78191704	151	Viruses	species	Crimean-Congo hemorrhagic fever virus	11593	11592	1993-04-24 01:00:00	ssRNA viruses	ssRNA negative-strand viruses					Viruses	Bunyaviridae	Nairovirus
78191706	11980	Viruses	species	Crimean-Congo hemorrhagic fever virus	11593	11592	1993-04-24 01:00:00	ssRNA viruses	ssRNA negative-strand viruses					Viruses	Bunyaviridae	Nairovirus
78191708	10800	Viruses	species	Crimean-Congo hemorrhagic fever virus	11593	11592	1993-04-24 01:00:00	ssRNA viruses	ssRNA negative-strand viruses					Viruses	Bunyaviridae	Nairovirus
78191710	10562	Viruses	species	Crimean-Congo hemorrhagic fever virus	11593	11592	1993-04-24 01:00:00	ssRNA viruses	ssRNA negative-strand viruses					Viruses	Bunyaviridae	Nairovirus
78191712	12131	Viruses	species	Crimean-Congo hemorrhagic fever virus	11593	11592	1993-04-24 01:00:00	ssRNA viruses	ssRNA negative-strand viruses					Viruses	Bunyaviridae	Nairovirus
78191714	1076	Viruses	species	Crimean-Congo hemorrhagic fever virus	11593	11592	1993-04-24 01:00:00	ssRNA viruses	ssRNA negative-strand viruses					Viruses	Bunyaviridae	Nairovirus
78191716	3898	Viruses	species	Crimean-Congo hemorrhagic fever virus	11593	11592	1993-04-24 01:00:00	ssRNA viruses	ssRNA negative-strand viruses					Viruses	Bunyaviridae	Nairovirus
78191718	961	Viruses	species	Crimean-Congo hemorrhagic fever virus	11593	11592	1993-04-24 01:00:00	ssRNA viruses	ssRNA negative-strand viruses					Viruses	Bunyaviridae	Nairovirus
78191720	10361	Viruses	species	Crimean-Congo hemorrhagic fever virus	11593	11592	1993-04-24 01:00:00	ssRNA viruses	ssRNA negative-strand viruses					Viruses	Bunyaviridae	Nairovirus
78191722	12128	Viruses	species	Crimean-Congo hemorrhagic fever virus	11593	11592	1993-04-24 01:00:00	ssRNA viruses	ssRNA negative-strand viruses					Viruses	Bunyaviridae	Nairovirus
78191724	5416	Viruses	species	Crimean-Congo hemorrhagic fever virus	11593	11592	1993-04-24 01:00:00	ssRNA viruses	ssRNA negative-strand viruses					Viruses	Bunyaviridae	Nairovirus
78191726	5386	Viruses	species	Crimean-Congo hemorrhagic fever virus	11593	11592	1993-04-24 01:00:00	ssRNA viruses	ssRNA negative-strand viruses					Viruses	Bunyaviridae	Nairovirus
78191728	5386	Viruses	species	Crimean-Congo hemorrhagic fever virus	11593	11592	1993-04-24 01:00:00	ssRNA viruses	ssRNA negative-strand viruses					Viruses	Bunyaviridae	Nairovirus
78191730	5431	Viruses	species	Crimean-Congo hemorrhagic fever virus	11593	11592	1993-04-24 01:00:00	ssRNA viruses	ssRNA negative-strand viruses					Viruses	Bunyaviridae	Nairovirus
78191732	5367	Viruses	species	Crimean-Congo hemorrhagic fever virus	11593	11592	1993-04-24 01:00:00	ssRNA viruses	ssRNA negative-strand viruses					Viruses	Bunyaviridae	Nairovirus
78191734	5364	Viruses	species	Crimean-Congo hemorrhagic fever virus	11593	11592	1993-04-24 01:00:00	ssRNA viruses	ssRNA negative-strand viruses					Viruses	Bunyaviridae	Nairovirus
78191736	5364	Viruses	species	Crimean-Congo hemorrhagic fever virus	11593	11592	1993-04-24 01:00:00	ssRNA viruses	ssRNA negative-strand viruses					Viruses	Bunyaviridae	Nairovirus
78191738	5319	Viruses	species	Crimean-Congo hemorrhagic fever virus	11593	11592	1993-04-24 01:00:00	ssRNA viruses	ssRNA negative-strand viruses					Viruses	Bunyaviridae	Nairovirus
78191740	5340	Viruses	species	Crimean-Congo hemorrhagic fever virus	11593	11592	1993-04-24 01:00:00	ssRNA viruses	ssRNA negative-strand viruses					Viruses	Bunyaviridae	Nairovirus
78191742	2965	Viruses	species	Crimean-Congo hemorrhagic fever virus	11593	11592	1993-04-24 01:00:00	ssRNA viruses	ssRNA negative-strand viruses					Viruses	Bunyaviridae	Nairovirus
78191744	5340	Viruses	species	Crimean-Congo hemorrhagic fever virus	11593	11592	1993-04-24 01:00:00	ssRNA viruses	ssRNA negative-strand viruses					Viruses	Bunyaviridae	Nairovirus
78191746	5364	Viruses	species	Crimean-Congo hemorrhagic fever virus	11593	11592	1993-04-24 01:00:00	ssRNA viruses	ssRNA negative-strand viruses					Viruses	Bunyaviridae	Nairovirus
78191748	5388	Viruses	species	Crimean-Congo hemorrhagic fever virus	11593	11592	1993-04-24 01:00:00	ssRNA viruses	ssRNA negative-strand viruses					Viruses	Bunyaviridae	Nairovirus
78191750	1659	Viruses	species	Crimean-Congo hemorrhagic fever virus	11593	11592	1993-04-24 01:00:00	ssRNA viruses	ssRNA negative-strand viruses					Viruses	Bunyaviridae	Nairovirus
78191752	1683	Viruses	species	Crimean-Congo hemorrhagic fever virus	11593	11592	1993-04-24 01:00:00	ssRNA viruses	ssRNA negative-strand viruses					Viruses	Bunyaviridae	Nairovirus
78191754	1683	Viruses	species	Crimean-Congo hemorrhagic fever virus	11593	11592	1993-04-24 01:00:00	ssRNA viruses	ssRNA negative-strand viruses					Viruses	Bunyaviridae	Nairovirus
78191756	869	Viruses	species	Crimean-Congo hemorrhagic fever virus	11593	11592	1993-04-24 01:00:00	ssRNA viruses	ssRNA negative-strand viruses					Viruses	Bunyaviridae	Nairovirus
78191758	1370	Viruses	species	Crimean-Congo hemorrhagic fever virus	11593	11592	1993-04-24 01:00:00	ssRNA viruses	ssRNA negative-strand viruses					Viruses	Bunyaviridae	Nairovirus
78191760	1658	Viruses	species	Crimean-Congo hemorrhagic fever virus	11593	11592	1993-04-24 01:00:00	ssRNA viruses	ssRNA negative-strand viruses					Viruses	Bunyaviridae	Nairovirus
78191762	1660	Viruses	species	Crimean-Congo hemorrhagic fever virus	11593	11592	1993-04-24 01:00:00	ssRNA viruses	ssRNA negative-strand viruses					Viruses	Bunyaviridae	Nairovirus
78191764	1545	Viruses	species	Crimean-Congo hemorrhagic fever virus	11593	11592	1993-04-24 01:00:00	ssRNA viruses	ssRNA negative-strand viruses					Viruses	Bunyaviridae	Nairovirus
78191766	528	Viruses	species	Crimean-Congo hemorrhagic fever virus	11593	11592	1993-04-24 01:00:00	ssRNA viruses	ssRNA negative-strand viruses					Viruses	Bunyaviridae	Nairovirus
78191768	778	Viruses	species	Crimean-Congo hemorrhagic fever virus	11593	11592	1993-04-24 01:00:00	ssRNA viruses	ssRNA negative-strand viruses					Viruses	Bunyaviridae	Nairovirus
78191770	718	Viruses	species	Crimean-Congo hemorrhagic fever virus	11593	11592	1993-04-24 01:00:00	ssRNA viruses	ssRNA negative-strand viruses					Viruses	Bunyaviridae	Nairovirus
78191772	1645	Viruses	species	Crimean-Congo hemorrhagic fever virus	11593	11592	1993-04-24 01:00:00	ssRNA viruses	ssRNA negative-strand viruses					Viruses	Bunyaviridae	Nairovirus
78191774	1627	Viruses	species	Crimean-Congo hemorrhagic fever virus	11593	11592	1993-04-24 01:00:00	ssRNA viruses	ssRNA negative-strand viruses					Viruses	Bunyaviridae	Nairovirus
78217450	110	Viruses	no rank	Seoul virus BjHD01	280855	11608	2004-06-16 18:03:00	ssRNA viruses	ssRNA negative-strand viruses					Viruses	Bunyaviridae	Hantavirus	Seoul virus
82395415	1645	Viruses	species	Crimean-Congo hemorrhagic fever virus	11593	11592	1993-04-24 01:00:00	ssRNA viruses	ssRNA negative-strand viruses					Viruses	Bunyaviridae	Nairovirus
82395417	5364	Viruses	species	Crimean-Congo hemorrhagic fever virus	11593	11592	1993-04-24 01:00:00	ssRNA viruses	ssRNA negative-strand viruses					Viruses	Bunyaviridae	Nairovirus
87137932	3561	Viruses	no rank	Hantaan virus Q32	370830	11599	2006-06-02 18:00:21	ssRNA viruses	ssRNA negative-strand viruses					Viruses	Bunyaviridae	Hantavirus	Hantaan virus
87137934	6488	Viruses	no rank	Hantaan virus Q32	370830	11599	2006-06-02 18:00:21	ssRNA viruses	ssRNA negative-strand viruses					Viruses	Bunyaviridae	Hantavirus	Hantaan virus
87622256	106	Viruses	species	Rift Valley fever virus	11588	11584	1993-04-24 01:00:00	ssRNA viruses	ssRNA negative-strand viruses					Viruses	Bunyaviridae	Phlebovirus
87622272	106	Viruses	species	Rift Valley fever virus	11588	11584	1993-04-24 01:00:00	ssRNA viruses	ssRNA negative-strand viruses					Viruses	Bunyaviridae	Phlebovirus
87622291	110	Viruses	species	Rift Valley fever virus	11588	11584	1993-04-24 01:00:00	ssRNA viruses	ssRNA negative-strand viruses					Viruses	Bunyaviridae	Phlebovirus
87622508	109	Viruses	species	Rift Valley fever virus	11588	11584	1993-04-24 01:00:00	ssRNA viruses	ssRNA negative-strand viruses					Viruses	Bunyaviridae	Phlebovirus
87622527	148	Viruses	species	Rift Valley fever virus	11588	11584	1993-04-24 01:00:00	ssRNA viruses	ssRNA negative-strand viruses					Viruses	Bunyaviridae	Phlebovirus
87622544	106	Viruses	species	Rift Valley fever virus	11588	11584	1993-04-24 01:00:00	ssRNA viruses	ssRNA negative-strand viruses					Viruses	Bunyaviridae	Phlebovirus
87622587	106	Viruses	species	Rift Valley fever virus	11588	11584	1993-04-24 01:00:00	ssRNA viruses	ssRNA negative-strand viruses					Viruses	Bunyaviridae	Phlebovirus
87622607	103	Viruses	species	Rift Valley fever virus	11588	11584	1993-04-24 01:00:00	ssRNA viruses	ssRNA negative-strand viruses					Viruses	Bunyaviridae	Phlebovirus
87622622	192	Viruses	species	Rift Valley fever virus	11588	11584	1993-04-24 01:00:00	ssRNA viruses	ssRNA negative-strand viruses					Viruses	Bunyaviridae	Phlebovirus
87622644	182	Viruses	species	Rift Valley fever virus	11588	11584	1993-04-24 01:00:00	ssRNA viruses	ssRNA negative-strand viruses					Viruses	Bunyaviridae	Phlebovirus
87622723	143	Viruses	species	Rift Valley fever virus	11588	11584	1993-04-24 01:00:00	ssRNA viruses	ssRNA negative-strand viruses					Viruses	Bunyaviridae	Phlebovirus
87622743	106	Viruses	species	Rift Valley fever virus	11588	11584	1993-04-24 01:00:00	ssRNA viruses	ssRNA negative-strand viruses					Viruses	Bunyaviridae	Phlebovirus
87622754	158	Viruses	species	Rift Valley fever virus	11588	11584	1993-04-24 01:00:00	ssRNA viruses	ssRNA negative-strand viruses					Viruses	Bunyaviridae	Phlebovirus
87622757	403	Viruses	species	Rift Valley fever virus	11588	11584	1993-04-24 01:00:00	ssRNA viruses	ssRNA negative-strand viruses					Viruses	Bunyaviridae	Phlebovirus
87622759	403	Viruses	species	Rift Valley fever virus	11588	11584	1993-04-24 01:00:00	ssRNA viruses	ssRNA negative-strand viruses					Viruses	Bunyaviridae	Phlebovirus
87622761	473	Viruses	species	Rift Valley fever virus	11588	11584	1993-04-24 01:00:00	ssRNA viruses	ssRNA negative-strand viruses					Viruses	Bunyaviridae	Phlebovirus
87622763	382	Viruses	species	Rift Valley fever virus	11588	11584	1993-04-24 01:00:00	ssRNA viruses	ssRNA negative-strand viruses					Viruses	Bunyaviridae	Phlebovirus
87622765	329	Viruses	species	Rift Valley fever virus	11588	11584	1993-04-24 01:00:00	ssRNA viruses	ssRNA negative-strand viruses					Viruses	Bunyaviridae	Phlebovirus
87622767	461	Viruses	species	Rift Valley fever virus	11588	11584	1993-04-24 01:00:00	ssRNA viruses	ssRNA negative-strand viruses					Viruses	Bunyaviridae	Phlebovirus
87622769	486	Viruses	species	Rift Valley fever virus	11588	11584	1993-04-24 01:00:00	ssRNA viruses	ssRNA negative-strand viruses					Viruses	Bunyaviridae	Phlebovirus
87622771	318	Viruses	species	Rift Valley fever virus	11588	11584	1993-04-24 01:00:00	ssRNA viruses	ssRNA negative-strand viruses					Viruses	Bunyaviridae	Phlebovirus
87622773	208	Viruses	species	Rift Valley fever virus	11588	11584	1993-04-24 01:00:00	ssRNA viruses	ssRNA negative-strand viruses					Viruses	Bunyaviridae	Phlebovirus
87622775	231	Viruses	species	Rift Valley fever virus	11588	11584	1993-04-24 01:00:00	ssRNA viruses	ssRNA negative-strand viruses					Viruses	Bunyaviridae	Phlebovirus
87622777	342	Viruses	species	Rift Valley fever virus	11588	11584	1993-04-24 01:00:00	ssRNA viruses	ssRNA negative-strand viruses					Viruses	Bunyaviridae	Phlebovirus
87622779	144	Viruses	species	Rift Valley fever virus	11588	11584	1993-04-24 01:00:00	ssRNA viruses	ssRNA negative-strand viruses					Viruses	Bunyaviridae	Phlebovirus
87622781	121	Viruses	species	Rift Valley fever virus	11588	11584	1993-04-24 01:00:00	ssRNA viruses	ssRNA negative-strand viruses					Viruses	Bunyaviridae	Phlebovirus
87622835	433	Viruses	species	Rift Valley fever virus	11588	11584	1993-04-24 01:00:00	ssRNA viruses	ssRNA negative-strand viruses					Viruses	Bunyaviridae	Phlebovirus
88769989	275	Viruses	species	Rift Valley fever virus	11588	11584	1993-04-24 01:00:00	ssRNA viruses	ssRNA negative-strand viruses					Viruses	Bunyaviridae	Phlebovirus
88769991	275	Viruses	species	Rift Valley fever virus	11588	11584	1993-04-24 01:00:00	ssRNA viruses	ssRNA negative-strand viruses					Viruses	Bunyaviridae	Phlebovirus
88769993	275	Viruses	species	Rift Valley fever virus	11588	11584	1993-04-24 01:00:00	ssRNA viruses	ssRNA negative-strand viruses					Viruses	Bunyaviridae	Phlebovirus
88769995	275	Viruses	species	Rift Valley fever virus	11588	11584	1993-04-24 01:00:00	ssRNA viruses	ssRNA negative-strand viruses					Viruses	Bunyaviridae	Phlebovirus
88769997	121	Viruses	species	Rift Valley fever virus	11588	11584	1993-04-24 01:00:00	ssRNA viruses	ssRNA negative-strand viruses					Viruses	Bunyaviridae	Phlebovirus
90811594	1434	Viruses	species	Crimean-Congo hemorrhagic fever virus	11593	11592	1993-04-24 01:00:00	ssRNA viruses	ssRNA negative-strand viruses					Viruses	Bunyaviridae	Nairovirus
90811596	1423	Viruses	species	Crimean-Congo hemorrhagic fever virus	11593	11592	1993-04-24 01:00:00	ssRNA viruses	ssRNA negative-strand viruses					Viruses	Bunyaviridae	Nairovirus
90811598	1423	Viruses	species	Crimean-Congo hemorrhagic fever virus	11593	11592	1993-04-24 01:00:00	ssRNA viruses	ssRNA negative-strand viruses					Viruses	Bunyaviridae	Nairovirus
90811600	4390	Viruses	species	Crimean-Congo hemorrhagic fever virus	11593	11592	1993-04-24 01:00:00	ssRNA viruses	ssRNA negative-strand viruses					Viruses	Bunyaviridae	Nairovirus
90811602	4542	Viruses	species	Crimean-Congo hemorrhagic fever virus	11593	11592	1993-04-24 01:00:00	ssRNA viruses	ssRNA negative-strand viruses					Viruses	Bunyaviridae	Nairovirus
91214433	4404	Viruses	no rank	Batai virus	80942	35304	1998-08-13 16:49:00	ssRNA viruses	ssRNA negative-strand viruses					Viruses	Bunyaviridae	Orthobunyavirus	Bunyamwera virus
94408494	12128	Viruses	species	Crimean-Congo hemorrhagic fever virus	11593	11592	1993-04-24 01:00:00	ssRNA viruses	ssRNA negative-strand viruses					Viruses	Bunyaviridae	Nairovirus
109894627	1625	Viruses	species	Hantaan virus	11599	11598	1993-04-24 01:00:00	ssRNA viruses	ssRNA negative-strand viruses					Viruses	Bunyaviridae	Hantavirus
111154389	4576	Viruses	no rank	Hazara virus	11596	11593	1993-04-24 01:00:00	ssRNA viruses	ssRNA negative-strand viruses					Viruses	Bunyaviridae	Nairovirus	Crimean-Congo hemorrhagic fever virus
116109033	6533	Viruses	species	Hantaan virus	11599	11598	1993-04-24 01:00:00	ssRNA viruses	ssRNA negative-strand viruses					Viruses	Bunyaviridae	Hantavirus
118340159	3496	Viruses	no rank	Hantaan virus N8	412620	11599	2006-11-27 18:00:23	ssRNA viruses	ssRNA negative-strand viruses					Viruses	Bunyaviridae	Hantavirus	Hantaan virus
119352105	408	Viruses	species	Seoul virus	11608	11598	1993-04-24 01:00:00	ssRNA viruses	ssRNA negative-strand viruses					Viruses	Bunyaviridae	Hantavirus
119514278	1562	Viruses	species	Crimean-Congo hemorrhagic fever virus	11593	11592	1993-04-24 01:00:00	ssRNA viruses	ssRNA negative-strand viruses					Viruses	Bunyaviridae	Nairovirus
122720705	281	Viruses	species	Seoul virus	11608	11598	1993-04-24 01:00:00	ssRNA viruses	ssRNA negative-strand viruses					Viruses	Bunyaviridae	Hantavirus
125656351	1495	Viruses	no rank	Hantavirus CJAp93	424382	11599	2007-02-18 18:00:24	ssRNA viruses	ssRNA negative-strand viruses					Viruses	Bunyaviridae	Hantavirus	Hantaan virus
125656375	3480	Viruses	no rank	Hantavirus CJAp93	424382	11599	2007-02-18 18:00:24	ssRNA viruses	ssRNA negative-strand viruses					Viruses	Bunyaviridae	Hantavirus	Hantaan virus
125664344	6454	Viruses	species	Puumala virus	11604	11598	1993-04-24 01:00:00	ssRNA viruses	ssRNA negative-strand viruses					Viruses	Bunyaviridae	Hantavirus
134035933	1807	Viruses	no rank	Puumala-like virus isolate Fusong-Cr-247	428555	11604	2007-03-28 18:00:25	ssRNA viruses	ssRNA negative-strand viruses					Viruses	Bunyaviridae	Hantavirus	Puumala virus
139472789	1518	Viruses	species	Crimean-Congo hemorrhagic fever virus	11593	11592	1993-04-24 01:00:00	ssRNA viruses	ssRNA negative-strand viruses					Viruses	Bunyaviridae	Nairovirus
139472793	1485	Viruses	species	Crimean-Congo hemorrhagic fever virus	11593	11592	1993-04-24 01:00:00	ssRNA viruses	ssRNA negative-strand viruses					Viruses	Bunyaviridae	Nairovirus
139472795	1536	Viruses	species	Crimean-Congo hemorrhagic fever virus	11593	11592	1993-04-24 01:00:00	ssRNA viruses	ssRNA negative-strand viruses					Viruses	Bunyaviridae	Nairovirus
146230131	143	Viruses	no rank	La Crosse virus	11577	35305	1993-04-24 01:00:00	ssRNA viruses	ssRNA negative-strand viruses					Viruses	Bunyaviridae	Orthobunyavirus	California encephalitis virus
146230133	110	Viruses	no rank	La Crosse virus	11577	35305	1993-04-24 01:00:00	ssRNA viruses	ssRNA negative-strand viruses					Viruses	Bunyaviridae	Orthobunyavirus	California encephalitis virus
146336857	1002	Viruses	species	Sandfly fever Sicilian virus	28292	327794	1993-08-03 01:00:00	ssRNA viruses	ssRNA negative-strand viruses	unclassified Phlebovirus				Viruses	Bunyaviridae	Phlebovirus
146336860	1782	Viruses	species	Sandfly fever Sicilian virus	28292	327794	1993-08-03 01:00:00	ssRNA viruses	ssRNA negative-strand viruses	unclassified Phlebovirus				Viruses	Bunyaviridae	Phlebovirus
146336863	1644	Viruses	species	Sandfly fever Sicilian virus	28292	327794	1993-08-03 01:00:00	ssRNA viruses	ssRNA negative-strand viruses	unclassified Phlebovirus				Viruses	Bunyaviridae	Phlebovirus
146336869	287	Viruses	species	Sandfly fever Sicilian virus	28292	327794	1993-08-03 01:00:00	ssRNA viruses	ssRNA negative-strand viruses	unclassified Phlebovirus				Viruses	Bunyaviridae	Phlebovirus
146336872	1748	Viruses	species	Sandfly fever Sicilian virus	28292	327794	1993-08-03 01:00:00	ssRNA viruses	ssRNA negative-strand viruses	unclassified Phlebovirus				Viruses	Bunyaviridae	Phlebovirus
146336875	1839	Viruses	species	Sandfly fever Naples virus	206160	11584	2003-02-26 18:01:00	ssRNA viruses	ssRNA negative-strand viruses					Viruses	Bunyaviridae	Phlebovirus
146336878	1830	Viruses	species	Sandfly fever Naples virus	206160	11584	2003-02-26 18:01:00	ssRNA viruses	ssRNA negative-strand viruses					Viruses	Bunyaviridae	Phlebovirus
146336881	1911	Viruses	species	Sandfly fever Naples virus	206160	11584	2003-02-26 18:01:00	ssRNA viruses	ssRNA negative-strand viruses					Viruses	Bunyaviridae	Phlebovirus
146336884	1851	Viruses	species	Sandfly fever Naples virus	206160	11584	2003-02-26 18:01:00	ssRNA viruses	ssRNA negative-strand viruses					Viruses	Bunyaviridae	Phlebovirus
146336887	1837	Viruses	species	Sandfly fever Naples virus	206160	11584	2003-02-26 18:01:00	ssRNA viruses	ssRNA negative-strand viruses					Viruses	Bunyaviridae	Phlebovirus
146336890	1694	Viruses	no rank	Toscana virus	11590	206160	1993-04-21 01:00:00	ssRNA viruses	ssRNA negative-strand viruses					Viruses	Bunyaviridae	Phlebovirus	Sandfly fever Naples virus
146424409	778	Viruses	species	Bunyamwera virus	35304	11572	1993-04-28 01:00:00	ssRNA viruses	ssRNA negative-strand viruses					Viruses	Bunyaviridae	Orthobunyavirus
146424411	526	Viruses	no rank	Birao virus	273358	35304	2004-05-12 18:01:10	ssRNA viruses	ssRNA negative-strand viruses					Viruses	Bunyaviridae	Orthobunyavirus	Bunyamwera virus
146424413	841	Viruses	no rank	Bozo virus	273349	35304	2004-05-12 18:01:10	ssRNA viruses	ssRNA negative-strand viruses					Viruses	Bunyaviridae	Orthobunyavirus	Bunyamwera virus
146760254	790	Viruses	no rank	Ilesha virus	273341	35304	2004-05-12 18:01:10	ssRNA viruses	ssRNA negative-strand viruses					Viruses	Bunyaviridae	Orthobunyavirus	Bunyamwera virus
146760256	690	Viruses	no rank	Ilesha virus	273341	35304	2004-05-12 18:01:10	ssRNA viruses	ssRNA negative-strand viruses					Viruses	Bunyaviridae	Orthobunyavirus	Bunyamwera virus
146771498	1809	Viruses	no rank	Araraquara-like virus strain P5/Cajuru	443745	46607	2007-05-22 18:00:26	ssRNA viruses	ssRNA negative-strand viruses					Viruses	Bunyaviridae	Hantavirus	Andes virus
148361453	161	Viruses	species	Seoul virus	11608	11598	1993-04-24 01:00:00	ssRNA viruses	ssRNA negative-strand viruses					Viruses	Bunyaviridae	Hantavirus
148611494	1608	Viruses	species	Hantaan virus	11599	11598	1993-04-24 01:00:00	ssRNA viruses	ssRNA negative-strand viruses					Viruses	Bunyaviridae	Hantavirus
149773698	268	Viruses	species	Rift Valley fever virus	11588	11584	1993-04-24 01:00:00	ssRNA viruses	ssRNA negative-strand viruses					Viruses	Bunyaviridae	Phlebovirus
149774695	230	Viruses	species	Rift Valley fever virus	11588	11584	1993-04-24 01:00:00	ssRNA viruses	ssRNA negative-strand viruses					Viruses	Bunyaviridae	Phlebovirus
154622980	1607	Viruses	no rank	Hantaanvirus CGRn93P8	458678	11599	2008-03-04 18:00:31	ssRNA viruses	ssRNA negative-strand viruses					Viruses	Bunyaviridae	Hantavirus	Hantaan virus
154622982	1601	Viruses	no rank	Hantaanvirus CGRn93MP8	458677	11599	2008-03-04 18:00:31	ssRNA viruses	ssRNA negative-strand viruses					Viruses	Bunyaviridae	Hantavirus	Hantaan virus
154622984	1603	Viruses	no rank	Hantaanvirus CGRn5310	458676	11599	2008-03-04 18:00:31	ssRNA viruses	ssRNA negative-strand viruses					Viruses	Bunyaviridae	Hantavirus	Hantaan virus
154622986	1601	Viruses	no rank	Hantaanvirus CGRn53	458675	11599	2008-03-04 18:00:31	ssRNA viruses	ssRNA negative-strand viruses					Viruses	Bunyaviridae	Hantavirus	Hantaan virus
154622988	1610	Viruses	no rank	Hantaanvirus CGHu3614	458672	11599	2008-03-04 18:00:31	ssRNA viruses	ssRNA negative-strand viruses					Viruses	Bunyaviridae	Hantavirus	Hantaan virus
154622990	1610	Viruses	no rank	Hantaanvirus CGHu3612	458671	11599	2008-03-04 18:00:31	ssRNA viruses	ssRNA negative-strand viruses					Viruses	Bunyaviridae	Hantavirus	Hantaan virus
154622992	1601	Viruses	no rank	Hantaanvirus CGAa31P9	458670	11599	2008-03-04 18:00:31	ssRNA viruses	ssRNA negative-strand viruses					Viruses	Bunyaviridae	Hantavirus	Hantaan virus
154622994	1611	Viruses	no rank	Hantaanvirus CGAa31MP7	458669	11599	2008-03-04 18:00:31	ssRNA viruses	ssRNA negative-strand viruses					Viruses	Bunyaviridae	Hantavirus	Hantaan virus
154622996	1635	Viruses	no rank	Hantaanvirus CGAa1015	458668	11599	2008-03-04 18:00:31	ssRNA viruses	ssRNA negative-strand viruses					Viruses	Bunyaviridae	Hantavirus	Hantaan virus
154622998	1627	Viruses	no rank	Hantaanvirus CGAa1011	458667	11599	2008-03-04 18:00:31	ssRNA viruses	ssRNA negative-strand viruses					Viruses	Bunyaviridae	Hantavirus	Hantaan virus
154623000	1626	Viruses	no rank	Hantaanvirus CGAa4P15	458674	11599	2008-03-04 18:00:31	ssRNA viruses	ssRNA negative-strand viruses					Viruses	Bunyaviridae	Hantavirus	Hantaan virus
154623002	1625	Viruses	no rank	Hantaanvirus CGAa4MP9	458673	11599	2008-03-04 18:00:31	ssRNA viruses	ssRNA negative-strand viruses					Viruses	Bunyaviridae	Hantavirus	Hantaan virus
154623008	3528	Viruses	no rank	Hantaanvirus CGRn93P8	458678	11599	2008-03-04 18:00:31	ssRNA viruses	ssRNA negative-strand viruses					Viruses	Bunyaviridae	Hantavirus	Hantaan virus
154623010	3528	Viruses	no rank	Hantaanvirus CGRn93MP8	458677	11599	2008-03-04 18:00:31	ssRNA viruses	ssRNA negative-strand viruses					Viruses	Bunyaviridae	Hantavirus	Hantaan virus
154623012	3528	Viruses	no rank	Hantaanvirus CGRn5310	458676	11599	2008-03-04 18:00:31	ssRNA viruses	ssRNA negative-strand viruses					Viruses	Bunyaviridae	Hantavirus	Hantaan virus
154623014	3528	Viruses	no rank	Hantaanvirus CGRn53	458675	11599	2008-03-04 18:00:31	ssRNA viruses	ssRNA negative-strand viruses					Viruses	Bunyaviridae	Hantavirus	Hantaan virus
154623016	3572	Viruses	no rank	Hantaanvirus CGHu3614	458672	11599	2008-03-04 18:00:31	ssRNA viruses	ssRNA negative-strand viruses					Viruses	Bunyaviridae	Hantavirus	Hantaan virus
154623018	3572	Viruses	no rank	Hantaanvirus CGHu3612	458671	11599	2008-03-04 18:00:31	ssRNA viruses	ssRNA negative-strand viruses					Viruses	Bunyaviridae	Hantavirus	Hantaan virus
154623020	3608	Viruses	no rank	Hantaanvirus CGAa31P9	458670	11599	2008-03-04 18:00:31	ssRNA viruses	ssRNA negative-strand viruses					Viruses	Bunyaviridae	Hantavirus	Hantaan virus
154623022	3608	Viruses	no rank	Hantaanvirus CGAa31MP7	458669	11599	2008-03-04 18:00:31	ssRNA viruses	ssRNA negative-strand viruses					Viruses	Bunyaviridae	Hantavirus	Hantaan virus
154623024	3540	Viruses	no rank	Hantaanvirus CGAa1015	458668	11599	2008-03-04 18:00:31	ssRNA viruses	ssRNA negative-strand viruses					Viruses	Bunyaviridae	Hantavirus	Hantaan virus
154623026	3540	Viruses	no rank	Hantaanvirus CGAa1011	458667	11599	2008-03-04 18:00:31	ssRNA viruses	ssRNA negative-strand viruses					Viruses	Bunyaviridae	Hantavirus	Hantaan virus
154623028	3543	Viruses	no rank	Hantaanvirus CGAa4P15	458674	11599	2008-03-04 18:00:31	ssRNA viruses	ssRNA negative-strand viruses					Viruses	Bunyaviridae	Hantavirus	Hantaan virus
154623030	3554	Viruses	no rank	Hantaanvirus CGAa4MP9	458673	11599	2008-03-04 18:00:31	ssRNA viruses	ssRNA negative-strand viruses					Viruses	Bunyaviridae	Hantavirus	Hantaan virus
154756747	138	Viruses	no rank	Toscana virus	11590	206160	1993-04-21 01:00:00	ssRNA viruses	ssRNA negative-strand viruses					Viruses	Bunyaviridae	Phlebovirus	Sandfly fever Naples virus
154756749	412	Viruses	no rank	Toscana virus	11590	206160	1993-04-21 01:00:00	ssRNA viruses	ssRNA negative-strand viruses					Viruses	Bunyaviridae	Phlebovirus	Sandfly fever Naples virus
154756751	401	Viruses	no rank	Toscana virus	11590	206160	1993-04-21 01:00:00	ssRNA viruses	ssRNA negative-strand viruses					Viruses	Bunyaviridae	Phlebovirus	Sandfly fever Naples virus
154756753	530	Viruses	no rank	Toscana virus	11590	206160	1993-04-21 01:00:00	ssRNA viruses	ssRNA negative-strand viruses					Viruses	Bunyaviridae	Phlebovirus	Sandfly fever Naples virus
154756757	407	Viruses	no rank	Toscana virus	11590	206160	1993-04-21 01:00:00	ssRNA viruses	ssRNA negative-strand viruses					Viruses	Bunyaviridae	Phlebovirus	Sandfly fever Naples virus
154756759	231	Viruses	no rank	Toscana virus	11590	206160	1993-04-21 01:00:00	ssRNA viruses	ssRNA negative-strand viruses					Viruses	Bunyaviridae	Phlebovirus	Sandfly fever Naples virus
154756761	280	Viruses	no rank	Toscana virus	11590	206160	1993-04-21 01:00:00	ssRNA viruses	ssRNA negative-strand viruses					Viruses	Bunyaviridae	Phlebovirus	Sandfly fever Naples virus
156106930	3559	Viruses	species	Hantaan virus	11599	11598	1993-04-24 01:00:00	ssRNA viruses	ssRNA negative-strand viruses					Viruses	Bunyaviridae	Hantavirus
156138711	175	Viruses	species	Akabane virus	70566	11572	1998-01-09	ssRNA viruses	ssRNA negative-strand viruses					Viruses	Bunyaviridae	Orthobunyavirus
156138714	199	Viruses	species	Akabane virus	70566	11572	1998-01-09	ssRNA viruses	ssRNA negative-strand viruses					Viruses	Bunyaviridae	Orthobunyavirus
156138717	172	Viruses	species	Akabane virus	70566	11572	1998-01-09	ssRNA viruses	ssRNA negative-strand viruses					Viruses	Bunyaviridae	Orthobunyavirus
156138720	3744	Viruses	species	Akabane virus	70566	11572	1998-01-09	ssRNA viruses	ssRNA negative-strand viruses					Viruses	Bunyaviridae	Orthobunyavirus
156138724	3438	Viruses	species	Akabane virus	70566	11572	1998-01-09	ssRNA viruses	ssRNA negative-strand viruses					Viruses	Bunyaviridae	Orthobunyavirus
156140145	3573	Viruses	species	Hantaan virus	11599	11598	1993-04-24 01:00:00	ssRNA viruses	ssRNA negative-strand viruses					Viruses	Bunyaviridae	Hantavirus
157886243	3481	Viruses	no rank	Hantaanvirus CGHu1	470918	11599	2008-03-04 18:00:31	ssRNA viruses	ssRNA negative-strand viruses					Viruses	Bunyaviridae	Hantavirus	Hantaan virus
157886245	3565	Viruses	no rank	Hantaanvirus CGAa2	470916	11599	2008-03-04 18:00:31	ssRNA viruses	ssRNA negative-strand viruses					Viruses	Bunyaviridae	Hantavirus	Hantaan virus
157886247	3566	Viruses	no rank	Hantaanvirus CGAa75	470917	11599	2008-03-04 18:00:31	ssRNA viruses	ssRNA negative-strand viruses					Viruses	Bunyaviridae	Hantavirus	Hantaan virus
157886249	3565	Viruses	no rank	Hantaanvirus CGRn45	470919	11599	2008-03-04 18:00:31	ssRNA viruses	ssRNA negative-strand viruses					Viruses	Bunyaviridae	Hantavirus	Hantaan virus
157886271	1423	Viruses	no rank	Hantaanvirus CGHu1	470918	11599	2008-03-04 18:00:31	ssRNA viruses	ssRNA negative-strand viruses					Viruses	Bunyaviridae	Hantavirus	Hantaan virus
157886273	1601	Viruses	no rank	Hantaanvirus CGAa2	470916	11599	2008-03-04 18:00:31	ssRNA viruses	ssRNA negative-strand viruses					Viruses	Bunyaviridae	Hantavirus	Hantaan virus
157886275	1607	Viruses	no rank	Hantaanvirus CGAa75	470917	11599	2008-03-04 18:00:31	ssRNA viruses	ssRNA negative-strand viruses					Viruses	Bunyaviridae	Hantavirus	Hantaan virus
157886277	1601	Viruses	no rank	Hantaanvirus CGRn45	470919	11599	2008-03-04 18:00:31	ssRNA viruses	ssRNA negative-strand viruses					Viruses	Bunyaviridae	Hantavirus	Hantaan virus
157929984	5364	Viruses	species	Crimean-Congo hemorrhagic fever virus	11593	11592	1993-04-24 01:00:00	ssRNA viruses	ssRNA negative-strand viruses					Viruses	Bunyaviridae	Nairovirus
157939567	858	Viruses	species	Akabane virus	70566	11572	1998-01-09	ssRNA viruses	ssRNA negative-strand viruses					Viruses	Bunyaviridae	Orthobunyavirus
157939615	6868	Viruses	species	Akabane virus	70566	11572	1998-01-09	ssRNA viruses	ssRNA negative-strand viruses					Viruses	Bunyaviridae	Orthobunyavirus
157939617	4309	Viruses	species	Akabane virus	70566	11572	1998-01-09	ssRNA viruses	ssRNA negative-strand viruses					Viruses	Bunyaviridae	Orthobunyavirus
158121996	10414	Viruses	species	Crimean-Congo hemorrhagic fever virus	11593	11592	1993-04-24 01:00:00	ssRNA viruses	ssRNA negative-strand viruses					Viruses	Bunyaviridae	Nairovirus
158936966	130	Viruses	species	Akabane virus	70566	11572	1998-01-09	ssRNA viruses	ssRNA negative-strand viruses					Viruses	Bunyaviridae	Orthobunyavirus
158936969	1282	Viruses	species	Akabane virus	70566	11572	1998-01-09	ssRNA viruses	ssRNA negative-strand viruses					Viruses	Bunyaviridae	Orthobunyavirus
158936977	3407	Viruses	species	Akabane virus	70566	11572	1998-01-09	ssRNA viruses	ssRNA negative-strand viruses					Viruses	Bunyaviridae	Orthobunyavirus
158936979	3642	Viruses	species	Akabane virus	70566	11572	1998-01-09	ssRNA viruses	ssRNA negative-strand viruses					Viruses	Bunyaviridae	Orthobunyavirus
158936985	3741	Viruses	species	Akabane virus	70566	11572	1998-01-09	ssRNA viruses	ssRNA negative-strand viruses					Viruses	Bunyaviridae	Orthobunyavirus
158936987	3740	Viruses	species	Akabane virus	70566	11572	1998-01-09	ssRNA viruses	ssRNA negative-strand viruses					Viruses	Bunyaviridae	Orthobunyavirus
158936989	3882	Viruses	species	Akabane virus	70566	11572	1998-01-09	ssRNA viruses	ssRNA negative-strand viruses					Viruses	Bunyaviridae	Orthobunyavirus
158936991	4217	Viruses	species	Akabane virus	70566	11572	1998-01-09	ssRNA viruses	ssRNA negative-strand viruses					Viruses	Bunyaviridae	Orthobunyavirus
158936993	4221	Viruses	species	Akabane virus	70566	11572	1998-01-09	ssRNA viruses	ssRNA negative-strand viruses					Viruses	Bunyaviridae	Orthobunyavirus
158936995	4275	Viruses	species	Akabane virus	70566	11572	1998-01-09	ssRNA viruses	ssRNA negative-strand viruses					Viruses	Bunyaviridae	Orthobunyavirus
158936997	3522	Viruses	species	Akabane virus	70566	11572	1998-01-09	ssRNA viruses	ssRNA negative-strand viruses					Viruses	Bunyaviridae	Orthobunyavirus
158937081	4271	Viruses	no rank	Tinaroo virus	66264	70566	1997-10-03 01:00:00	ssRNA viruses	ssRNA negative-strand viruses					Viruses	Bunyaviridae	Orthobunyavirus	Akabane virus
158937089	3439	Viruses	species	Akabane virus	70566	11572	1998-01-09	ssRNA viruses	ssRNA negative-strand viruses					Viruses	Bunyaviridae	Orthobunyavirus
158937091	3382	Viruses	species	Akabane virus	70566	11572	1998-01-09	ssRNA viruses	ssRNA negative-strand viruses					Viruses	Bunyaviridae	Orthobunyavirus
158937093	3361	Viruses	species	Akabane virus	70566	11572	1998-01-09	ssRNA viruses	ssRNA negative-strand viruses					Viruses	Bunyaviridae	Orthobunyavirus
158937095	3369	Viruses	species	Akabane virus	70566	11572	1998-01-09	ssRNA viruses	ssRNA negative-strand viruses					Viruses	Bunyaviridae	Orthobunyavirus
158937097	3361	Viruses	species	Akabane virus	70566	11572	1998-01-09	ssRNA viruses	ssRNA negative-strand viruses					Viruses	Bunyaviridae	Orthobunyavirus
158937107	3254	Viruses	species	Akabane virus	70566	11572	1998-01-09	ssRNA viruses	ssRNA negative-strand viruses					Viruses	Bunyaviridae	Orthobunyavirus
158937109	3361	Viruses	species	Akabane virus	70566	11572	1998-01-09	ssRNA viruses	ssRNA negative-strand viruses					Viruses	Bunyaviridae	Orthobunyavirus
158937111	3385	Viruses	species	Akabane virus	70566	11572	1998-01-09	ssRNA viruses	ssRNA negative-strand viruses					Viruses	Bunyaviridae	Orthobunyavirus
158937113	3516	Viruses	species	Akabane virus	70566	11572	1998-01-09	ssRNA viruses	ssRNA negative-strand viruses					Viruses	Bunyaviridae	Orthobunyavirus
158937117	3814	Viruses	species	Akabane virus	70566	11572	1998-01-09	ssRNA viruses	ssRNA negative-strand viruses					Viruses	Bunyaviridae	Orthobunyavirus
158937119	958	Viruses	species	Akabane virus	70566	11572	1998-01-09	ssRNA viruses	ssRNA negative-strand viruses					Viruses	Bunyaviridae	Orthobunyavirus
160700821	4434	Viruses	no rank	Snowshoe hare virus	11580	35305	1993-08-03 01:00:00	ssRNA viruses	ssRNA negative-strand viruses					Viruses	Bunyaviridae	Orthobunyavirus	California encephalitis virus
162423255	747	Viruses	no rank	Snowshoe hare virus	11580	35305	1993-08-03 01:00:00	ssRNA viruses	ssRNA negative-strand viruses					Viruses	Bunyaviridae	Orthobunyavirus	California encephalitis virus
163937828	1706	Viruses	species	Puumala virus	11604	11598	1993-04-24 01:00:00	ssRNA viruses	ssRNA negative-strand viruses					Viruses	Bunyaviridae	Hantavirus
163937829	3676	Viruses	species	Puumala virus	11604	11598	1993-04-24 01:00:00	ssRNA viruses	ssRNA negative-strand viruses					Viruses	Bunyaviridae	Hantavirus
163937830	6485	Viruses	species	Puumala virus	11604	11598	1993-04-24 01:00:00	ssRNA viruses	ssRNA negative-strand viruses					Viruses	Bunyaviridae	Hantavirus
169794204	6882	Viruses	no rank	Snowshoe hare virus	11580	35305	1993-08-03 01:00:00	ssRNA viruses	ssRNA negative-strand viruses					Viruses	Bunyaviridae	Orthobunyavirus	California encephalitis virus
184216207	6894	Viruses	no rank	Chatanga virus	507486	35305	2008-03-05 18:00:29	ssRNA viruses	ssRNA negative-strand viruses					Viruses	Bunyaviridae	Orthobunyavirus	California encephalitis virus
186911969	4461	Viruses	no rank	Chatanga virus	507486	35305	2008-03-05 18:00:29	ssRNA viruses	ssRNA negative-strand viruses					Viruses	Bunyaviridae	Orthobunyavirus	California encephalitis virus
188543036	1530	Viruses	species	Thottapalayam virus	262967	11598	2004-02-19 18:03:27	ssRNA viruses	ssRNA negative-strand viruses					Viruses	Bunyaviridae	Hantavirus
188543069	6581	Viruses	species	Thottapalayam virus	262967	11598	2004-02-19 18:03:27	ssRNA viruses	ssRNA negative-strand viruses					Viruses	Bunyaviridae	Hantavirus
188543102	3621	Viruses	species	Thottapalayam virus	262967	11598	2004-02-19 18:03:27	ssRNA viruses	ssRNA negative-strand viruses					Viruses	Bunyaviridae	Hantavirus
189544556	809	Viruses	no rank	Fort Sherman virus	273345	35304	2004-05-12 18:01:10	ssRNA viruses	ssRNA negative-strand viruses					Viruses	Bunyaviridae	Orthobunyavirus	Bunyamwera virus
193084934	6895	Viruses	no rank	Inkoo virus	45269	35305	1996-01-24 11:28:00	ssRNA viruses	ssRNA negative-strand viruses					Viruses	Bunyaviridae	Orthobunyavirus	California encephalitis virus
193090028	726	Viruses	no rank	Shokwe virus	273359	35304	2004-05-12 18:01:10	ssRNA viruses	ssRNA negative-strand viruses					Viruses	Bunyaviridae	Orthobunyavirus	Bunyamwera virus
193884164	331	Viruses	species	Akabane virus	70566	11572	1998-01-09	ssRNA viruses	ssRNA negative-strand viruses					Viruses	Bunyaviridae	Orthobunyavirus
193884167	3697	Viruses	species	Akabane virus	70566	11572	1998-01-09	ssRNA viruses	ssRNA negative-strand viruses					Viruses	Bunyaviridae	Orthobunyavirus
193884169	309	Viruses	species	Akabane virus	70566	11572	1998-01-09	ssRNA viruses	ssRNA negative-strand viruses					Viruses	Bunyaviridae	Orthobunyavirus
193884172	333	Viruses	species	Akabane virus	70566	11572	1998-01-09	ssRNA viruses	ssRNA negative-strand viruses					Viruses	Bunyaviridae	Orthobunyavirus
193884175	329	Viruses	species	Akabane virus	70566	11572	1998-01-09	ssRNA viruses	ssRNA negative-strand viruses					Viruses	Bunyaviridae	Orthobunyavirus
193884178	333	Viruses	species	Akabane virus	70566	11572	1998-01-09	ssRNA viruses	ssRNA negative-strand viruses					Viruses	Bunyaviridae	Orthobunyavirus
193884181	331	Viruses	species	Akabane virus	70566	11572	1998-01-09	ssRNA viruses	ssRNA negative-strand viruses					Viruses	Bunyaviridae	Orthobunyavirus
193884184	331	Viruses	species	Akabane virus	70566	11572	1998-01-09	ssRNA viruses	ssRNA negative-strand viruses					Viruses	Bunyaviridae	Orthobunyavirus
193884187	331	Viruses	species	Akabane virus	70566	11572	1998-01-09	ssRNA viruses	ssRNA negative-strand viruses					Viruses	Bunyaviridae	Orthobunyavirus
193884190	331	Viruses	species	Akabane virus	70566	11572	1998-01-09	ssRNA viruses	ssRNA negative-strand viruses					Viruses	Bunyaviridae	Orthobunyavirus
193884193	331	Viruses	species	Akabane virus	70566	11572	1998-01-09	ssRNA viruses	ssRNA negative-strand viruses					Viruses	Bunyaviridae	Orthobunyavirus
193884196	331	Viruses	species	Akabane virus	70566	11572	1998-01-09	ssRNA viruses	ssRNA negative-strand viruses					Viruses	Bunyaviridae	Orthobunyavirus
193884199	331	Viruses	species	Akabane virus	70566	11572	1998-01-09	ssRNA viruses	ssRNA negative-strand viruses					Viruses	Bunyaviridae	Orthobunyavirus
193884202	3677	Viruses	species	Akabane virus	70566	11572	1998-01-09	ssRNA viruses	ssRNA negative-strand viruses					Viruses	Bunyaviridae	Orthobunyavirus
193884204	3674	Viruses	species	Akabane virus	70566	11572	1998-01-09	ssRNA viruses	ssRNA negative-strand viruses					Viruses	Bunyaviridae	Orthobunyavirus
193884206	3716	Viruses	species	Akabane virus	70566	11572	1998-01-09	ssRNA viruses	ssRNA negative-strand viruses					Viruses	Bunyaviridae	Orthobunyavirus
207365844	6402	Viruses	no rank	Massilia virus	391640	206160	2008-07-30 18:00:21	ssRNA viruses	ssRNA negative-strand viruses					Viruses	Bunyaviridae	Phlebovirus	Sandfly fever Naples virus
207365846	4219	Viruses	no rank	Massilia virus	391640	206160	2008-07-30 18:00:21	ssRNA viruses	ssRNA negative-strand viruses					Viruses	Bunyaviridae	Phlebovirus	Sandfly fever Naples virus
207365848	1864	Viruses	no rank	Massilia virus	391640	206160	2008-07-30 18:00:21	ssRNA viruses	ssRNA negative-strand viruses					Viruses	Bunyaviridae	Phlebovirus	Sandfly fever Naples virus
219918644	1536	Viruses	species	Tula virus	37133	11598	1995-11-21	ssRNA viruses	ssRNA negative-strand viruses					Viruses	Bunyaviridae	Hantavirus
223587117	1659	Viruses	no rank	Toscana virus	11590	206160	1993-04-21 01:00:00	ssRNA viruses	ssRNA negative-strand viruses					Viruses	Bunyaviridae	Phlebovirus	Sandfly fever Naples virus
223587120	1695	Viruses	no rank	Toscana virus	11590	206160	1993-04-21 01:00:00	ssRNA viruses	ssRNA negative-strand viruses					Viruses	Bunyaviridae	Phlebovirus	Sandfly fever Naples virus
226222575	1659	Viruses	no rank	Toscana virus	11590	206160	1993-04-21 01:00:00	ssRNA viruses	ssRNA negative-strand viruses					Viruses	Bunyaviridae	Phlebovirus	Sandfly fever Naples virus
269912916	1488	Viruses	species	Puumala virus	11604	11598	1993-04-24 01:00:00	ssRNA viruses	ssRNA negative-strand viruses					Viruses	Bunyaviridae	Hantavirus
269912918	1457	Viruses	species	Puumala virus	11604	11598	1993-04-24 01:00:00	ssRNA viruses	ssRNA negative-strand viruses					Viruses	Bunyaviridae	Hantavirus
302148443	3676	Viruses	species	Puumala virus	11604	11598	1993-04-24 01:00:00	ssRNA viruses	ssRNA negative-strand viruses					Viruses	Bunyaviridae	Hantavirus
302148445	1468	Viruses	species	Puumala virus	11604	11598	1993-04-24 01:00:00	ssRNA viruses	ssRNA negative-strand viruses					Viruses	Bunyaviridae	Hantavirus
302148447	3677	Viruses	species	Puumala virus	11604	11598	1993-04-24 01:00:00	ssRNA viruses	ssRNA negative-strand viruses					Viruses	Bunyaviridae	Hantavirus
302148451	1466	Viruses	species	Puumala virus	11604	11598	1993-04-24 01:00:00	ssRNA viruses	ssRNA negative-strand viruses					Viruses	Bunyaviridae	Hantavirus
302190128	6473	Viruses	species	Puumala virus	11604	11598	1993-04-24 01:00:00	ssRNA viruses	ssRNA negative-strand viruses					Viruses	Bunyaviridae	Hantavirus
302190130	6457	Viruses	species	Puumala virus	11604	11598	1993-04-24 01:00:00	ssRNA viruses	ssRNA negative-strand viruses					Viruses	Bunyaviridae	Hantavirus
302596920	6404	Viruses	species	Rift Valley fever virus	11588	11584	1993-04-24 01:00:00	ssRNA viruses	ssRNA negative-strand viruses					Viruses	Bunyaviridae	Phlebovirus
302596922	3885	Viruses	species	Rift Valley fever virus	11588	11584	1993-04-24 01:00:00	ssRNA viruses	ssRNA negative-strand viruses					Viruses	Bunyaviridae	Phlebovirus
302596924	1690	Viruses	species	Rift Valley fever virus	11588	11584	1993-04-24 01:00:00	ssRNA viruses	ssRNA negative-strand viruses					Viruses	Bunyaviridae	Phlebovirus
323145749	182	Viruses	no rank	SFTS virus AH12	992210	1003835	2011-03-05 18:00:36	ssRNA viruses	ssRNA negative-strand viruses	unclassified Phlebovirus				Viruses	Bunyaviridae	Phlebovirus	Severe fever with thrombocytopenia syndrome virus
325209531	110	Viruses	no rank	SFTS virus SD4	992220	1003835	2011-03-09 18:00:32	ssRNA viruses	ssRNA negative-strand viruses	unclassified Phlebovirus				Viruses	Bunyaviridae	Phlebovirus	Severe fever with thrombocytopenia syndrome virus
325209533	122	Viruses	no rank	SFTS virus SD4	992220	1003835	2011-03-09 18:00:32	ssRNA viruses	ssRNA negative-strand viruses	unclassified Phlebovirus				Viruses	Bunyaviridae	Phlebovirus	Severe fever with thrombocytopenia syndrome virus
325209541	134	Viruses	no rank	SFTS virus AH12	992210	1003835	2011-03-05 18:00:36	ssRNA viruses	ssRNA negative-strand viruses	unclassified Phlebovirus				Viruses	Bunyaviridae	Phlebovirus	Severe fever with thrombocytopenia syndrome virus
325209543	120	Viruses	no rank	SFTS virus AH12	992210	1003835	2011-03-05 18:00:36	ssRNA viruses	ssRNA negative-strand viruses	unclassified Phlebovirus				Viruses	Bunyaviridae	Phlebovirus	Severe fever with thrombocytopenia syndrome virus
325209548	265	Viruses	no rank	SFTS virus AH15	992211	1003835	2011-03-09 18:00:32	ssRNA viruses	ssRNA negative-strand viruses	unclassified Phlebovirus				Viruses	Bunyaviridae	Phlebovirus	Severe fever with thrombocytopenia syndrome virus
325209555	110	Viruses	no rank	SFTS virus HN6	992214	1003835	2011-03-09 18:00:32	ssRNA viruses	ssRNA negative-strand viruses	unclassified Phlebovirus				Viruses	Bunyaviridae	Phlebovirus	Severe fever with thrombocytopenia syndrome virus
325209562	143	Viruses	no rank	SFTS virus HN13	992213	1003835	2011-03-09 18:00:32	ssRNA viruses	ssRNA negative-strand viruses	unclassified Phlebovirus				Viruses	Bunyaviridae	Phlebovirus	Severe fever with thrombocytopenia syndrome virus
325209564	365	Viruses	no rank	SFTS virus HN13	992213	1003835	2011-03-09 18:00:32	ssRNA viruses	ssRNA negative-strand viruses	unclassified Phlebovirus				Viruses	Bunyaviridae	Phlebovirus	Severe fever with thrombocytopenia syndrome virus
325209569	147	Viruses	no rank	SFTS virus JS3	992215	1003835	2011-03-09 18:00:32	ssRNA viruses	ssRNA negative-strand viruses	unclassified Phlebovirus				Viruses	Bunyaviridae	Phlebovirus	Severe fever with thrombocytopenia syndrome virus
325209574	110	Viruses	no rank	SFTS virus JS4	992216	1003835	2011-03-09 18:00:32	ssRNA viruses	ssRNA negative-strand viruses	unclassified Phlebovirus				Viruses	Bunyaviridae	Phlebovirus	Severe fever with thrombocytopenia syndrome virus
325209576	122	Viruses	no rank	SFTS virus JS4	992216	1003835	2011-03-09 18:00:32	ssRNA viruses	ssRNA negative-strand viruses	unclassified Phlebovirus				Viruses	Bunyaviridae	Phlebovirus	Severe fever with thrombocytopenia syndrome virus
325209583	110	Viruses	no rank	SFTS virus LN2	992217	1003835	2011-03-09 18:00:32	ssRNA viruses	ssRNA negative-strand viruses	unclassified Phlebovirus				Viruses	Bunyaviridae	Phlebovirus	Severe fever with thrombocytopenia syndrome virus
325209590	185	Viruses	no rank	SFTS virus LN3	992218	1003835	2011-03-09 18:00:32	ssRNA viruses	ssRNA negative-strand viruses	unclassified Phlebovirus				Viruses	Bunyaviridae	Phlebovirus	Severe fever with thrombocytopenia syndrome virus
326416220	234	Viruses	no rank	Orthobunyavirus BX-2010/Henan/CHN	930075	1003835	2010-11-30 18:00:49	ssRNA viruses	ssRNA negative-strand viruses	unclassified Phlebovirus				Viruses	Bunyaviridae	Phlebovirus	Severe fever with thrombocytopenia syndrome virus
326416222	342	Viruses	no rank	Orthobunyavirus BX-2010/Henan/CHN	930075	1003835	2010-11-30 18:00:49	ssRNA viruses	ssRNA negative-strand viruses	unclassified Phlebovirus				Viruses	Bunyaviridae	Phlebovirus	Severe fever with thrombocytopenia syndrome virus
326416224	318	Viruses	no rank	Orthobunyavirus BX-2010/Henan/CHN	930075	1003835	2010-11-30 18:00:49	ssRNA viruses	ssRNA negative-strand viruses	unclassified Phlebovirus				Viruses	Bunyaviridae	Phlebovirus	Severe fever with thrombocytopenia syndrome virus
326784687	1351	Viruses	species	Hantaan virus	11599	11598	1993-04-24 01:00:00	ssRNA viruses	ssRNA negative-strand viruses					Viruses	Bunyaviridae	Hantavirus
326784689	3429	Viruses	species	Hantaan virus	11599	11598	1993-04-24 01:00:00	ssRNA viruses	ssRNA negative-strand viruses					Viruses	Bunyaviridae	Hantavirus
326784691	6015	Viruses	species	Hantaan virus	11599	11598	1993-04-24 01:00:00	ssRNA viruses	ssRNA negative-strand viruses					Viruses	Bunyaviridae	Hantavirus
327177665	5835	Viruses	no rank	Jacunda virus	1000411	629725	2011-04-02 18:00:37	ssRNA viruses	ssRNA negative-strand viruses					Viruses	Bunyaviridae	Phlebovirus	Candiru virus
327177667	3963	Viruses	no rank	Jacunda virus	1000411	629725	2011-04-02 18:00:37	ssRNA viruses	ssRNA negative-strand viruses					Viruses	Bunyaviridae	Phlebovirus	Candiru virus
327177669	1488	Viruses	no rank	Jacunda virus	1000411	629725	2011-04-02 18:00:37	ssRNA viruses	ssRNA negative-strand viruses					Viruses	Bunyaviridae	Phlebovirus	Candiru virus
327178153	4286	Viruses	no rank	Alenquer virus	629726	629725	2009-07-07 18:00:35	ssRNA viruses	ssRNA negative-strand viruses					Viruses	Bunyaviridae	Phlebovirus	Candiru virus
327178155	3989	Viruses	no rank	Maldonado virus	1004889	629725	2011-04-09 18:00:31	ssRNA viruses	ssRNA negative-strand viruses					Viruses	Bunyaviridae	Phlebovirus	Candiru virus
327178157	4526	Viruses	no rank	Ariquemes virus	1000645	629725	2011-04-02 18:00:37	ssRNA viruses	ssRNA negative-strand viruses					Viruses	Bunyaviridae	Phlebovirus	Candiru virus
327178161	4287	Viruses	no rank	Echarate virus	1000646	629725	2011-04-02 18:00:37	ssRNA viruses	ssRNA negative-strand viruses					Viruses	Bunyaviridae	Phlebovirus	Candiru virus
327178163	4365	Viruses	no rank	Itaituba virus	655689	629725	2009-07-12 18:00:35	ssRNA viruses	ssRNA negative-strand viruses					Viruses	Bunyaviridae	Phlebovirus	Candiru virus
327178165	4320	Viruses	no rank	Mucura virus	1000648	629725	2011-04-02 18:00:37	ssRNA viruses	ssRNA negative-strand viruses					Viruses	Bunyaviridae	Phlebovirus	Candiru virus
327178167	4387	Viruses	no rank	Morumbi virus	1000647	629725	2011-04-02 18:00:37	ssRNA viruses	ssRNA negative-strand viruses					Viruses	Bunyaviridae	Phlebovirus	Candiru virus
327178169	4235	Viruses	no rank	Nique virus	629739	629725	2009-07-07 18:00:35	ssRNA viruses	ssRNA negative-strand viruses					Viruses	Bunyaviridae	Phlebovirus	Candiru virus
327178171	4558	Viruses	no rank	Serra Norte virus	1000649	629725	2011-04-02 18:00:37	ssRNA viruses	ssRNA negative-strand viruses					Viruses	Bunyaviridae	Phlebovirus	Candiru virus
327178173	4420	Viruses	no rank	Turuna virus	629737	629725	2009-07-07 18:00:35	ssRNA viruses	ssRNA negative-strand viruses					Viruses	Bunyaviridae	Phlebovirus	Candiru virus
327178175	4424	Viruses	no rank	Oriximina virus	655691	629725	2011-04-02 18:00:37	ssRNA viruses	ssRNA negative-strand viruses					Viruses	Bunyaviridae	Phlebovirus	Candiru virus
327178177	6418	Viruses	no rank	Alenquer virus	629726	629725	2009-07-07 18:00:35	ssRNA viruses	ssRNA negative-strand viruses					Viruses	Bunyaviridae	Phlebovirus	Candiru virus
327178179	6276	Viruses	no rank	Maldonado virus	1004889	629725	2011-04-09 18:00:31	ssRNA viruses	ssRNA negative-strand viruses					Viruses	Bunyaviridae	Phlebovirus	Candiru virus
327178181	6380	Viruses	no rank	Ariquemes virus	1000645	629725	2011-04-02 18:00:37	ssRNA viruses	ssRNA negative-strand viruses					Viruses	Bunyaviridae	Phlebovirus	Candiru virus
327178185	6411	Viruses	no rank	Echarate virus	1000646	629725	2011-04-02 18:00:37	ssRNA viruses	ssRNA negative-strand viruses					Viruses	Bunyaviridae	Phlebovirus	Candiru virus
327178187	6448	Viruses	no rank	Itaituba virus	655689	629725	2009-07-12 18:00:35	ssRNA viruses	ssRNA negative-strand viruses					Viruses	Bunyaviridae	Phlebovirus	Candiru virus
327178189	5283	Viruses	no rank	Mucura virus	1000648	629725	2011-04-02 18:00:37	ssRNA viruses	ssRNA negative-strand viruses					Viruses	Bunyaviridae	Phlebovirus	Candiru virus
327178191	5555	Viruses	no rank	Morumbi virus	1000647	629725	2011-04-02 18:00:37	ssRNA viruses	ssRNA negative-strand viruses					Viruses	Bunyaviridae	Phlebovirus	Candiru virus
327178193	6408	Viruses	no rank	Nique virus	629739	629725	2009-07-07 18:00:35	ssRNA viruses	ssRNA negative-strand viruses					Viruses	Bunyaviridae	Phlebovirus	Candiru virus
327178195	6412	Viruses	no rank	Serra Norte virus	1000649	629725	2011-04-02 18:00:37	ssRNA viruses	ssRNA negative-strand viruses					Viruses	Bunyaviridae	Phlebovirus	Candiru virus
327178197	6405	Viruses	no rank	Turuna virus	629737	629725	2009-07-07 18:00:35	ssRNA viruses	ssRNA negative-strand viruses					Viruses	Bunyaviridae	Phlebovirus	Candiru virus
327178199	6408	Viruses	no rank	Oriximina virus	655691	629725	2011-04-02 18:00:37	ssRNA viruses	ssRNA negative-strand viruses					Viruses	Bunyaviridae	Phlebovirus	Candiru virus
327178201	1751	Viruses	no rank	Alenquer virus	629726	629725	2009-07-07 18:00:35	ssRNA viruses	ssRNA negative-strand viruses					Viruses	Bunyaviridae	Phlebovirus	Candiru virus
327178204	1888	Viruses	no rank	Ariquemes virus	1000645	629725	2011-04-02 18:00:37	ssRNA viruses	ssRNA negative-strand viruses					Viruses	Bunyaviridae	Phlebovirus	Candiru virus
327178210	1818	Viruses	no rank	Echarate virus	1000646	629725	2011-04-02 18:00:37	ssRNA viruses	ssRNA negative-strand viruses					Viruses	Bunyaviridae	Phlebovirus	Candiru virus
327178213	1827	Viruses	no rank	Maldonado virus	1004889	629725	2011-04-09 18:00:31	ssRNA viruses	ssRNA negative-strand viruses					Viruses	Bunyaviridae	Phlebovirus	Candiru virus
327178216	1894	Viruses	no rank	Itaituba virus	655689	629725	2009-07-12 18:00:35	ssRNA viruses	ssRNA negative-strand viruses					Viruses	Bunyaviridae	Phlebovirus	Candiru virus
327178219	1575	Viruses	no rank	Mucura virus	1000648	629725	2011-04-02 18:00:37	ssRNA viruses	ssRNA negative-strand viruses					Viruses	Bunyaviridae	Phlebovirus	Candiru virus
327178222	1583	Viruses	no rank	Morumbi virus	1000647	629725	2011-04-02 18:00:37	ssRNA viruses	ssRNA negative-strand viruses					Viruses	Bunyaviridae	Phlebovirus	Candiru virus
327178225	1744	Viruses	no rank	Nique virus	629739	629725	2009-07-07 18:00:35	ssRNA viruses	ssRNA negative-strand viruses					Viruses	Bunyaviridae	Phlebovirus	Candiru virus
327178228	1861	Viruses	no rank	Serra Norte virus	1000649	629725	2011-04-02 18:00:37	ssRNA viruses	ssRNA negative-strand viruses					Viruses	Bunyaviridae	Phlebovirus	Candiru virus
327178231	1827	Viruses	no rank	Turuna virus	629737	629725	2009-07-07 18:00:35	ssRNA viruses	ssRNA negative-strand viruses					Viruses	Bunyaviridae	Phlebovirus	Candiru virus
327178234	1866	Viruses	no rank	Oriximina virus	655691	629725	2011-04-02 18:00:37	ssRNA viruses	ssRNA negative-strand viruses					Viruses	Bunyaviridae	Phlebovirus	Candiru virus
328545954	1842	Viruses	species	Candiru virus	629725	11584	2009-07-07 18:00:35	ssRNA viruses	ssRNA negative-strand viruses					Viruses	Bunyaviridae	Phlebovirus
328550464	4326	Viruses	species	Candiru virus	629725	11584	2009-07-07 18:00:35	ssRNA viruses	ssRNA negative-strand viruses					Viruses	Bunyaviridae	Phlebovirus
328550466	6327	Viruses	species	Candiru virus	629725	11584	2009-07-07 18:00:35	ssRNA viruses	ssRNA negative-strand viruses					Viruses	Bunyaviridae	Phlebovirus
328933899	5861	Viruses	no rank	Armero virus	1006584	1006583	2011-04-20 18:00:31	ssRNA viruses	ssRNA negative-strand viruses	unclassified Phlebovirus				Viruses	Bunyaviridae	Phlebovirus	Aguacate virus
328933903	1290	Viruses	no rank	Armero virus	1006584	1006583	2011-04-20 18:00:31	ssRNA viruses	ssRNA negative-strand viruses	unclassified Phlebovirus				Viruses	Bunyaviridae	Phlebovirus	Aguacate virus
328933906	6379	Viruses	no rank	Durania virus	1006585	1006583	2011-04-20 18:00:31	ssRNA viruses	ssRNA negative-strand viruses	unclassified Phlebovirus				Viruses	Bunyaviridae	Phlebovirus	Aguacate virus
328933908	1834	Viruses	no rank	Durania virus	1006585	1006583	2011-04-20 18:00:31	ssRNA viruses	ssRNA negative-strand viruses	unclassified Phlebovirus				Viruses	Bunyaviridae	Phlebovirus	Aguacate virus
328933911	4186	Viruses	no rank	Durania virus	1006585	1006583	2011-04-20 18:00:31	ssRNA viruses	ssRNA negative-strand viruses	unclassified Phlebovirus				Viruses	Bunyaviridae	Phlebovirus	Aguacate virus
328933913	1808	Viruses	no rank	Ixcanal virus	1006586	1006583	2011-04-20 18:00:31	ssRNA viruses	ssRNA negative-strand viruses	unclassified Phlebovirus				Viruses	Bunyaviridae	Phlebovirus	Aguacate virus
328933916	6392	Viruses	no rank	Ixcanal virus	1006586	1006583	2011-04-20 18:00:31	ssRNA viruses	ssRNA negative-strand viruses	unclassified Phlebovirus				Viruses	Bunyaviridae	Phlebovirus	Aguacate virus
328933918	4158	Viruses	no rank	Ixcanal virus	1006586	1006583	2011-04-20 18:00:31	ssRNA viruses	ssRNA negative-strand viruses	unclassified Phlebovirus				Viruses	Bunyaviridae	Phlebovirus	Aguacate virus
328933920	5847	Viruses	no rank	Armero virus	1006584	1006583	2011-04-20 18:00:31	ssRNA viruses	ssRNA negative-strand viruses	unclassified Phlebovirus				Viruses	Bunyaviridae	Phlebovirus	Aguacate virus
328933922	4157	Viruses	no rank	Armero virus	1006584	1006583	2011-04-20 18:00:31	ssRNA viruses	ssRNA negative-strand viruses	unclassified Phlebovirus				Viruses	Bunyaviridae	Phlebovirus	Aguacate virus
328933924	1290	Viruses	no rank	Armero virus	1006584	1006583	2011-04-20 18:00:31	ssRNA viruses	ssRNA negative-strand viruses	unclassified Phlebovirus				Viruses	Bunyaviridae	Phlebovirus	Aguacate virus
330422507	230	Viruses	species	Rift Valley fever virus	11588	11584	1993-04-24 01:00:00	ssRNA viruses	ssRNA negative-strand viruses					Viruses	Bunyaviridae	Phlebovirus
330422509	265	Viruses	species	Rift Valley fever virus	11588	11584	1993-04-24 01:00:00	ssRNA viruses	ssRNA negative-strand viruses					Viruses	Bunyaviridae	Phlebovirus
330422511	230	Viruses	species	Rift Valley fever virus	11588	11584	1993-04-24 01:00:00	ssRNA viruses	ssRNA negative-strand viruses					Viruses	Bunyaviridae	Phlebovirus
330422513	271	Viruses	species	Rift Valley fever virus	11588	11584	1993-04-24 01:00:00	ssRNA viruses	ssRNA negative-strand viruses					Viruses	Bunyaviridae	Phlebovirus
330422519	230	Viruses	species	Rift Valley fever virus	11588	11584	1993-04-24 01:00:00	ssRNA viruses	ssRNA negative-strand viruses					Viruses	Bunyaviridae	Phlebovirus
330422521	230	Viruses	species	Rift Valley fever virus	11588	11584	1993-04-24 01:00:00	ssRNA viruses	ssRNA negative-strand viruses					Viruses	Bunyaviridae	Phlebovirus
330422523	265	Viruses	species	Rift Valley fever virus	11588	11584	1993-04-24 01:00:00	ssRNA viruses	ssRNA negative-strand viruses					Viruses	Bunyaviridae	Phlebovirus
330422525	110	Viruses	species	Rift Valley fever virus	11588	11584	1993-04-24 01:00:00	ssRNA viruses	ssRNA negative-strand viruses					Viruses	Bunyaviridae	Phlebovirus
330422528	110	Viruses	species	Rift Valley fever virus	11588	11584	1993-04-24 01:00:00	ssRNA viruses	ssRNA negative-strand viruses					Viruses	Bunyaviridae	Phlebovirus
330422531	110	Viruses	species	Rift Valley fever virus	11588	11584	1993-04-24 01:00:00	ssRNA viruses	ssRNA negative-strand viruses					Viruses	Bunyaviridae	Phlebovirus
330422534	110	Viruses	species	Rift Valley fever virus	11588	11584	1993-04-24 01:00:00	ssRNA viruses	ssRNA negative-strand viruses					Viruses	Bunyaviridae	Phlebovirus
330422537	110	Viruses	species	Rift Valley fever virus	11588	11584	1993-04-24 01:00:00	ssRNA viruses	ssRNA negative-strand viruses					Viruses	Bunyaviridae	Phlebovirus
330422540	110	Viruses	species	Rift Valley fever virus	11588	11584	1993-04-24 01:00:00	ssRNA viruses	ssRNA negative-strand viruses					Viruses	Bunyaviridae	Phlebovirus
330422543	110	Viruses	species	Rift Valley fever virus	11588	11584	1993-04-24 01:00:00	ssRNA viruses	ssRNA negative-strand viruses					Viruses	Bunyaviridae	Phlebovirus
330422546	110	Viruses	species	Rift Valley fever virus	11588	11584	1993-04-24 01:00:00	ssRNA viruses	ssRNA negative-strand viruses					Viruses	Bunyaviridae	Phlebovirus
330422549	110	Viruses	species	Rift Valley fever virus	11588	11584	1993-04-24 01:00:00	ssRNA viruses	ssRNA negative-strand viruses					Viruses	Bunyaviridae	Phlebovirus
330444744	4403	Viruses	no rank	Sandfly fever Turkey virus	688699	28292	2010-08-02 18:00:44	ssRNA viruses	ssRNA negative-strand viruses	unclassified Phlebovirus				Viruses	Bunyaviridae	Phlebovirus	Sandfly fever Sicilian virus
330444746	6439	Viruses	no rank	Sandfly fever Turkey virus	688699	28292	2010-08-02 18:00:44	ssRNA viruses	ssRNA negative-strand viruses	unclassified Phlebovirus				Viruses	Bunyaviridae	Phlebovirus	Sandfly fever Sicilian virus
330464826	1761	Viruses	no rank	Sandfly fever Turkey virus	688699	28292	2010-08-02 18:00:44	ssRNA viruses	ssRNA negative-strand viruses	unclassified Phlebovirus				Viruses	Bunyaviridae	Phlebovirus	Sandfly fever Sicilian virus
330850808	4185	Viruses	species	Aguacate virus	1006583	327794	2011-04-20 18:00:31	ssRNA viruses	ssRNA negative-strand viruses	unclassified Phlebovirus				Viruses	Bunyaviridae	Phlebovirus
330850810	6393	Viruses	species	Aguacate virus	1006583	327794	2011-04-20 18:00:31	ssRNA viruses	ssRNA negative-strand viruses	unclassified Phlebovirus				Viruses	Bunyaviridae	Phlebovirus
330850812	1830	Viruses	species	Aguacate virus	1006583	327794	2011-04-20 18:00:31	ssRNA viruses	ssRNA negative-strand viruses	unclassified Phlebovirus				Viruses	Bunyaviridae	Phlebovirus
331031491	161	Viruses	no rank	Phlebovirus JS24	1010663	1003835	2011-06-01 18:00:47	ssRNA viruses	ssRNA negative-strand viruses	unclassified Phlebovirus				Viruses	Bunyaviridae	Phlebovirus	Severe fever with thrombocytopenia syndrome virus
331031493	161	Viruses	no rank	Phlebovirus JS26	1010664	1003835	2011-06-01 18:00:47	ssRNA viruses	ssRNA negative-strand viruses	unclassified Phlebovirus				Viruses	Bunyaviridae	Phlebovirus	Severe fever with thrombocytopenia syndrome virus
331031495	143	Viruses	no rank	Phlebovirus JS6	1010665	1003835	2011-06-01 18:00:47	ssRNA viruses	ssRNA negative-strand viruses	unclassified Phlebovirus				Viruses	Bunyaviridae	Phlebovirus	Severe fever with thrombocytopenia syndrome virus
332157193	230	Viruses	species	Rift Valley fever virus	11588	11584	1993-04-24 01:00:00	ssRNA viruses	ssRNA negative-strand viruses					Viruses	Bunyaviridae	Phlebovirus
332167863	245	Viruses	no rank	Phlebovirus JS2007-01	1017370	1003835	2011-07-01 18:00:50	ssRNA viruses	ssRNA negative-strand viruses	unclassified Phlebovirus				Viruses	Bunyaviridae	Phlebovirus	Severe fever with thrombocytopenia syndrome virus
334108974	1534	Viruses	species	Hantaan virus	11599	11598	1993-04-24 01:00:00	ssRNA viruses	ssRNA negative-strand viruses					Viruses	Bunyaviridae	Hantavirus
337730197	907	Viruses	species	Crimean-Congo hemorrhagic fever virus	11593	11592	1993-04-24 01:00:00	ssRNA viruses	ssRNA negative-strand viruses					Viruses	Bunyaviridae	Nairovirus
337730199	4566	Viruses	species	Crimean-Congo hemorrhagic fever virus	11593	11592	1993-04-24 01:00:00	ssRNA viruses	ssRNA negative-strand viruses					Viruses	Bunyaviridae	Nairovirus
337730201	4739	Viruses	species	Crimean-Congo hemorrhagic fever virus	11593	11592	1993-04-24 01:00:00	ssRNA viruses	ssRNA negative-strand viruses					Viruses	Bunyaviridae	Nairovirus
337730203	4743	Viruses	species	Crimean-Congo hemorrhagic fever virus	11593	11592	1993-04-24 01:00:00	ssRNA viruses	ssRNA negative-strand viruses					Viruses	Bunyaviridae	Nairovirus
337730205	159	Viruses	species	Crimean-Congo hemorrhagic fever virus	11593	11592	1993-04-24 01:00:00	ssRNA viruses	ssRNA negative-strand viruses					Viruses	Bunyaviridae	Nairovirus
337730207	1124	Viruses	species	Crimean-Congo hemorrhagic fever virus	11593	11592	1993-04-24 01:00:00	ssRNA viruses	ssRNA negative-strand viruses					Viruses	Bunyaviridae	Nairovirus
337730209	1123	Viruses	species	Crimean-Congo hemorrhagic fever virus	11593	11592	1993-04-24 01:00:00	ssRNA viruses	ssRNA negative-strand viruses					Viruses	Bunyaviridae	Nairovirus
337730213	197	Viruses	species	Crimean-Congo hemorrhagic fever virus	11593	11592	1993-04-24 01:00:00	ssRNA viruses	ssRNA negative-strand viruses					Viruses	Bunyaviridae	Nairovirus
339830675	1570	Viruses	no rank	Hantaan virus CA09082007	1054851	11599	2011-07-19 18:00:49	ssRNA viruses	ssRNA negative-strand viruses					Viruses	Bunyaviridae	Hantavirus	Hantaan virus
[truncated: 42,842 more rows]
