# Supplementary figures and images for: Enhanced virome sequencing using targeted sequence capture
Source: HighWire-hosted journal article supplement (doi:10.1101/gr.191049.115), 2015-09-22

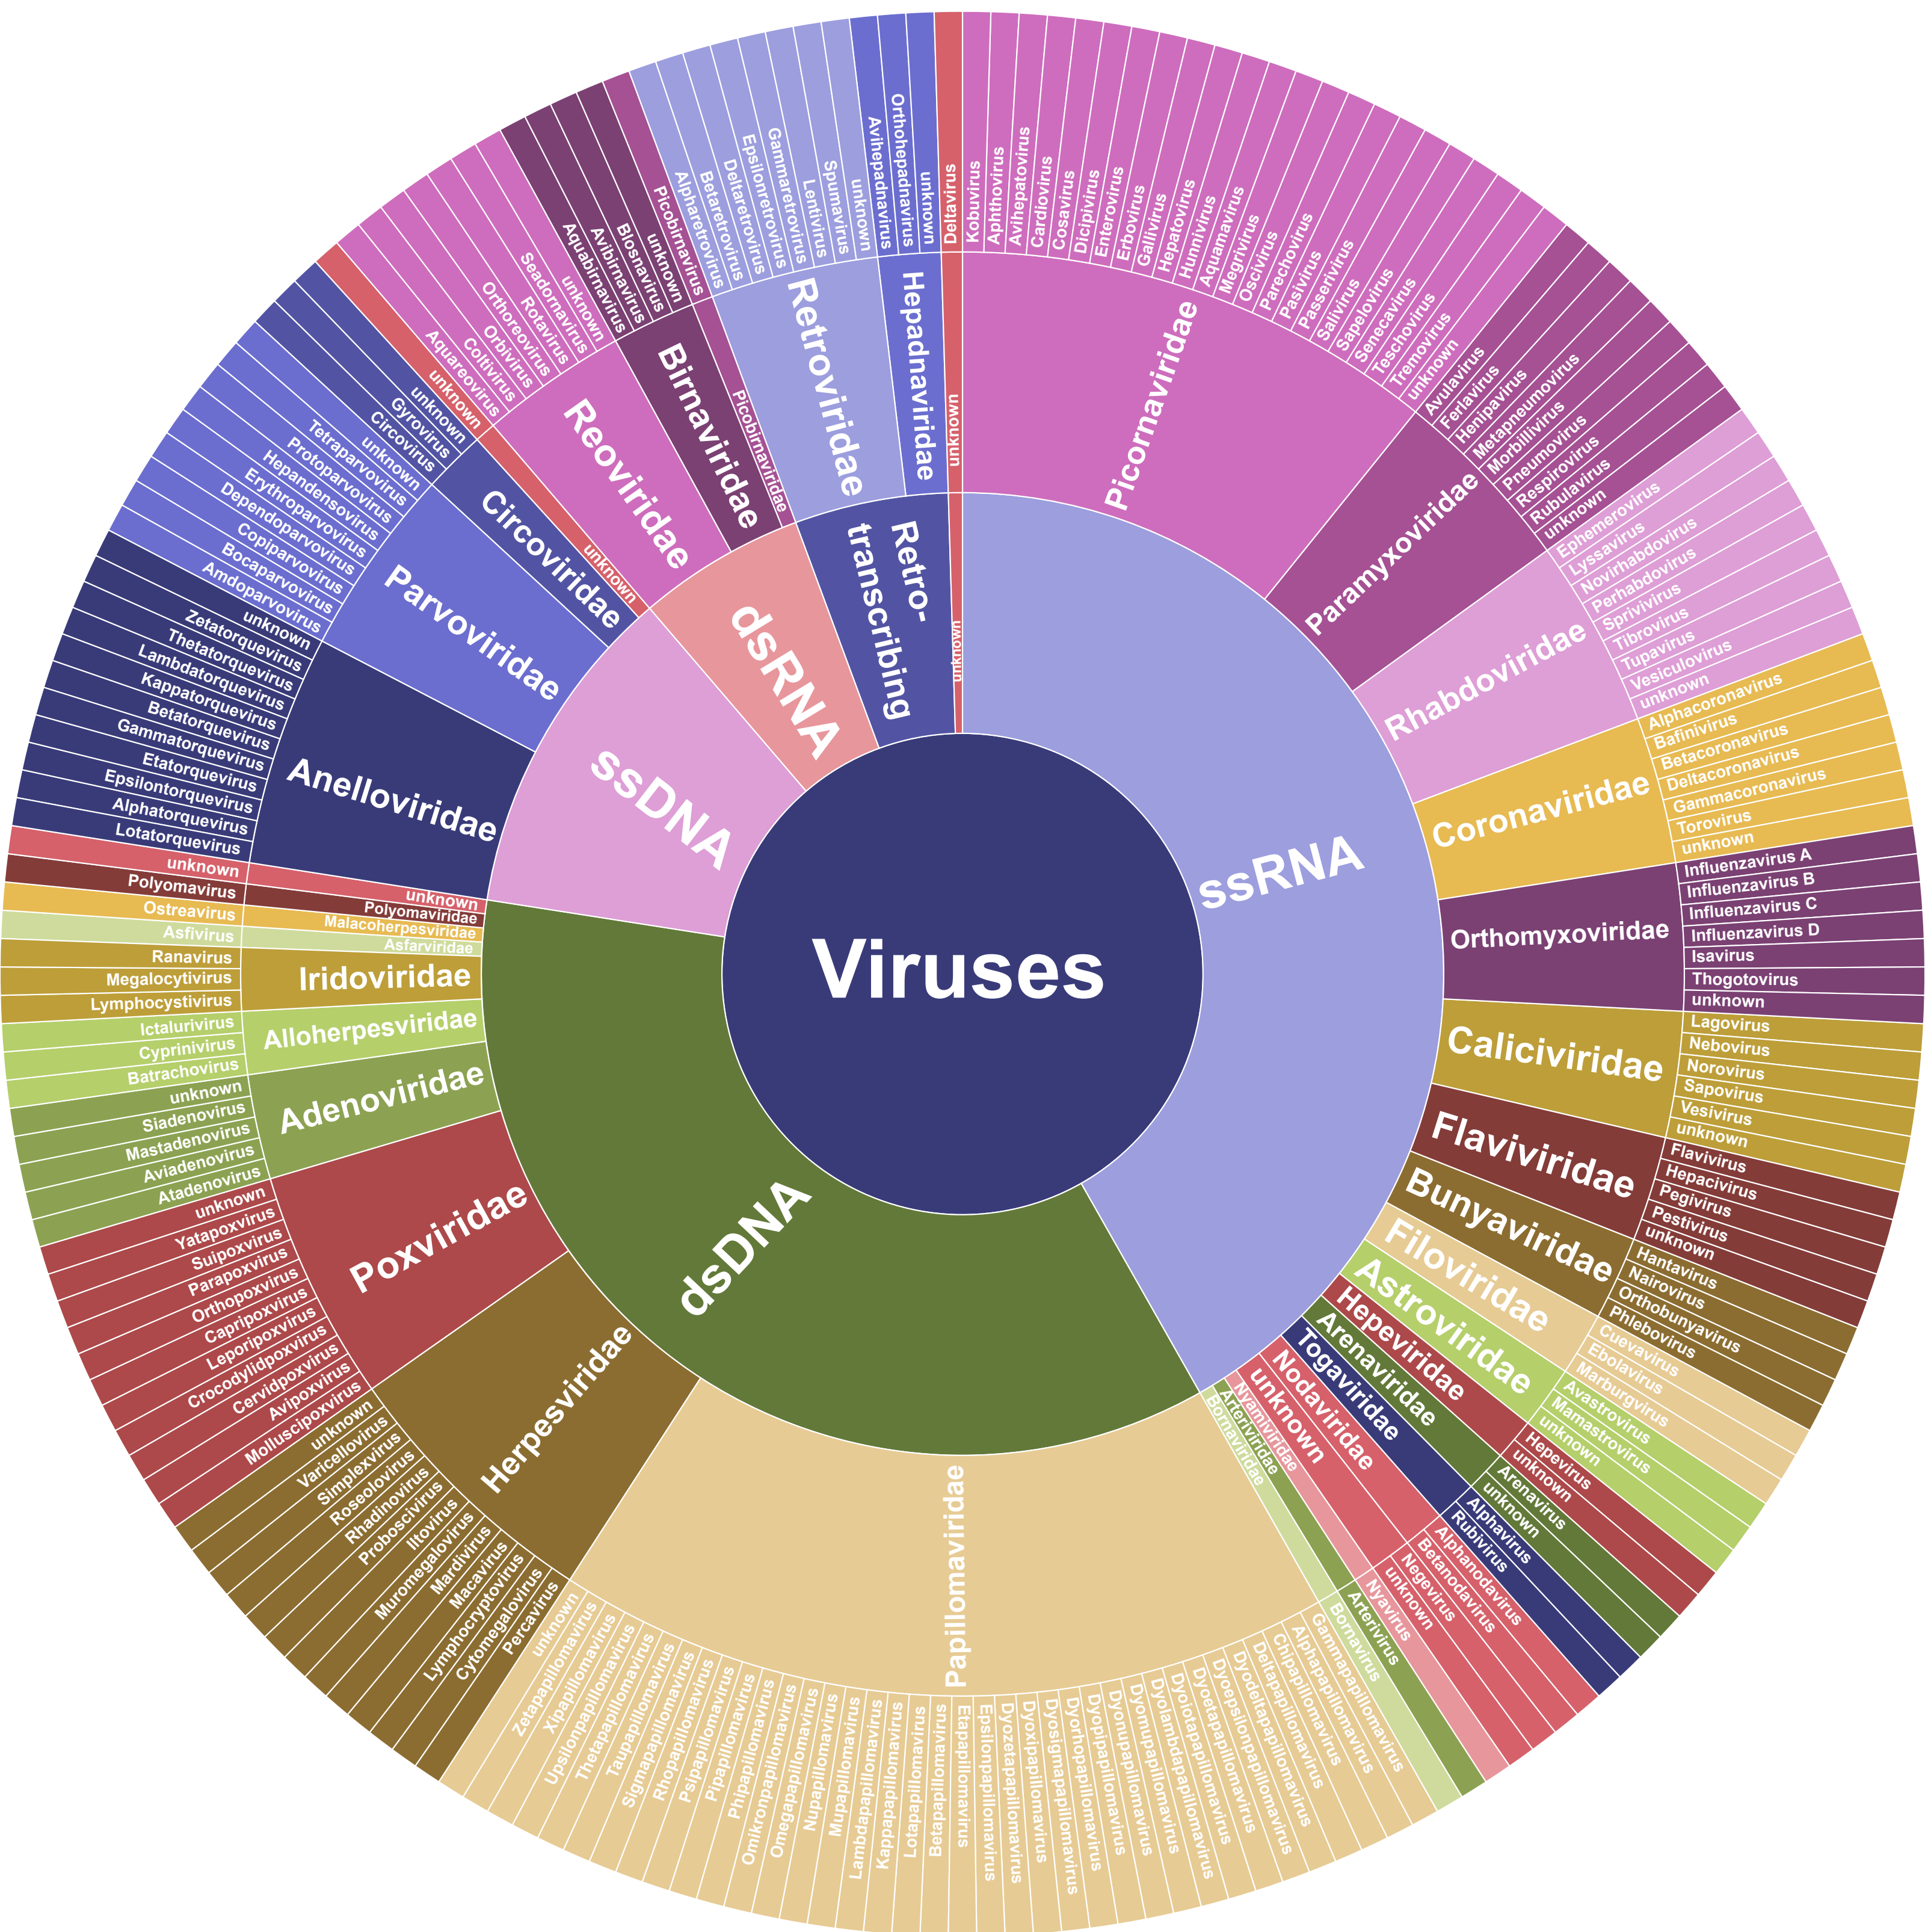

Supplement: ViroCap-1.0.zip [file ViroCap_taxonomy.pdf › ViroCap-1.0/capture/taxonomy/ViroCap_taxonomy.pdf]
